# Supplementary material for: Data-driven catalyst optimization for stereodivergent asymmetric synthesis of α-allyl carboxylic acids by iridium/boron hybrid catalysis
Source: Research Square preprint supplement (doi:10.21203/rs.3.rs-558825/v1), 2021-06-14
Supplement: Supplementary file 1 [file 1e2361616652466bfea05abf.pdf]

# **Data-driven catalyst optimization for stereodivergent asymmetric synthesis of $\alpha$ -allyl carboxylic acids by iridium/boron hybrid catalysis**

Hongyu Chen, Shigeru Yamaguchi\*, Yuya Morita, Hiroyasu Nakao, Xiangning Zhai, Yohei Shimizu, Harunobu Mitsunuma\* and Motomu Kanai\*

Correspondence to: shigeru.yamaguchi.hw@riken.jp (S.Y.); h-mitsunuma@mol.f.u-tokyo.ac.jp (H. M.); kanai@mol.f.u-tokyo.ac.jp (M. K.)

## Table of Contents

|                                                                                |      |
|--------------------------------------------------------------------------------|------|
| <b>1. General Method</b>                                                       | S3   |
| <b>2. Synthesis of Substrates</b>                                              | S4   |
| <b>3. General Procedure for the Reaction Conditions</b>                        | S21  |
| <b>4. Procedure for Phosphoramidite Ligand Synthesis</b>                       | S67  |
| <b>5. Determination of Relative and Absolute Configuration of the Products</b> | S75  |
| <b>6. Stereodivergent Transformation of 2a</b>                                 | S78  |
| <b>7. Initial Screening Results</b>                                            | S83  |
| <b>8. Limitations</b>                                                          | S86  |
| <b>9. Control Experiment using Carreira's Reaction Conditions</b>              | S88  |
| <b>10. Dataset</b>                                                             | S89  |
| <b>11. Details of the Molecular Field Analysis</b>                             | S92  |
| Python and R scripts for MFA                                                   | S95  |
| Calculations of the molecular fields                                           | S107 |
| Plots of the measured vs predicted values                                      | S108 |
| Details of the molecular design                                                | S112 |
| Determination of the threshold value                                           | S115 |
| Validation of the regression models using test samples                         | S120 |
| Discussion about conformers                                                    | S124 |
| Another design pathway                                                         | S125 |
| Possible diastereoiduction mechanism                                           | S131 |
| MFA using descriptor2                                                          | S133 |
| MFA using enantioselectivity data                                              | S140 |
| MFA using dr data of (2 <i>R</i> , 3 <i>R</i> )-2/(2 <i>S</i> , 3 <i>R</i> )-2 | S145 |
| MFA using structures optimized at the B3LYP-D3/LANL2DZ and 6-31G* level        | S160 |
| <b>12. References and Notes</b>                                                | S163 |
| <b>13. NMR Charts</b>                                                          | S166 |



## 1. General Methods

$^1\text{H}$  and  $^{13}\text{C}$  NMR spectra were recorded on a JEOL ECX500 (500 MHz for  $^1\text{H}$  NMR and 125 MHz for  $^{13}\text{C}$  NMR) or a JEOL ECS400 (400 MHz for  $^1\text{H}$  NMR and 100 MHz for  $^{13}\text{C}$  NMR) spectrometer. Chemical shifts were reported in the scale relative to the solvent used as an internal reference for  $^1\text{H}$  ( $\delta = 7.26$  ppm for  $\text{CDCl}_3$ ) and  $^{13}\text{C}$  NMR ( $\delta = 77.00$  ppm for  $\text{CDCl}_3$ ). Electrospray ionization (ESI)-mass spectra were measured on a JEOL JMS-T100LC AccuTOF spectrometer for HRMS. Infrared (IR) spectra were recorded on a JASCO FT/IR 410 Fourier transform infrared spectrophotometer. The enantiomeric excesses (ee's) were determined by HPLC analysis conducted by JASCO HPLC systems (pump: PU-2080; detector: UV-2075, measured at 254 nm or at 210 nm; chiral column OZ-H, IG, IB N-3, IB N-5, IC-3; mobile phase: hexane/2-propanol). Optical rotations were measured on a JASCO P-1010 polarimeter. Column chromatographies were performed with silica gel Merck 60 (230-400 mesh ASTM) or neutral silica gel 60 N (KANTO CHEMICAL, spherical, neutral, 40-100  $\mu\text{m}$ ), Biotage Isolera One and Biotage SNAP Ultra, or Yamazen Smart Flash and Universal Column Premium. DBU was purified by distillation from  $\text{CaH}_2$  and used under argon atmosphere. LiCl was dried under vacuum at 80  $^\circ\text{C}$  for 24 h and used under argon atmosphere. Reagents that were not further described were purchased from Aldrich, Tokyo Chemical Industry Co., Ltd. (TCI), Kanto Chemical Co., Inc., and Wako Pure Chemical Industries, Ltd. and used without further purification.

## 2. Synthesis of Substrates

### Procedure for preparation of 1a, 1d, 1e, 1p-w, 1y

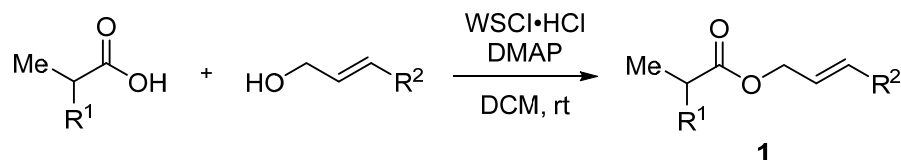

In a flame-dried flask, a solution of carboxylic acid (1.2 equiv) in DCM (ca. 1 M) was cooled to 0 °C. Alcohol (1.0 equiv),  $\text{WSCl}\cdot\text{HCl}$  (1.2 equiv) and DMAP (0.1 equiv) were added sequentially at 0 °C to the solution, and the mixture was stirred at room temperature for overnight. The resulting mixture was diluted with DCM and washed with aqueous HCl (1 M) and saturated  $\text{NaHCO}_3$  aq. The organic layer was washed with brine, and dried over  $\text{Na}_2\text{SO}_4$ . After filtration, the solvent was evaporated under reduced pressure. The residue was purified by silica gel column chromatography to afford pure product **1**.

#### (*E*)-hept-2-en-1-yl 2-phenylpropanoate (**1a**)

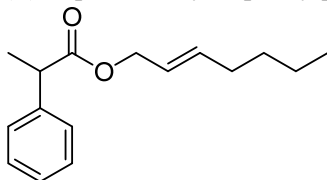

Yield: 80%

$^1\text{H}$  NMR (500 MHz,  $\text{CDCl}_3$ ):  $\delta$  = 0.88 (t,  $J$  = 7.2 Hz, 3H), 1.25-1.36 (m, 4H), 1.50 (d,  $J$  = 7.0 Hz, 3H), 2.02 (dt,  $J$  = 6.9, 6.9 Hz, 2H), 3.73 (q,  $J$  = 7.0 Hz, 1H), 4.46-4.55 (m, 2H), 5.47-5.53 (m, 1H), 5.65-5.71 (m, 1H), 7.23-7.28 (m, 1H), 7.30-7.32 (m, 4H);  $^{13}\text{C}$  NMR (125 MHz,  $\text{CDCl}_3$ ):  $\delta$  = 13.9, 18.6, 22.1, 31.0, 31.9, 45.5, 65.4, 123.6, 127.0, 127.5, 128.5, 136.4, 140.6, 174.3; IR (neat): 2930, 1736, 1455, 1165, 972, 698  $\text{cm}^{-1}$ ; HRMS (ESI):  $m/z$  calcd for  $\text{C}_{16}\text{H}_{22}\text{O}_2$  [ $\text{M}+\text{Na}$ ] $^+$  269.1512. Found 269.1525.

#### (*E*)-hept-2-en-1-yl 2-(4-chlorophenyl)propanoate (**1d**)

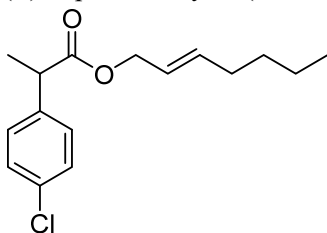

Yield: 54%

$^1\text{H}$  NMR (400 MHz,  $\text{CDCl}_3$ ):  $\delta$  = 0.87 (t,  $J$  = 7.3 Hz, 3H), 1.19-1.35 (m, 4H), 1.46 (d,  $J$  = 7.3 Hz, 3H), 2.00 (dt,  $J$  = 7.3, 7.3 Hz, 2H), 3.68 (q,  $J$  = 7.3 Hz, 1H), 4.44-4.53 (m, 2H), 5.43-5.50 (m, 1H), 5.63-5.70 (m, 1H), 7.21-7.28 (m, 4H);  $^{13}\text{C}$  NMR (100 MHz,  $\text{CDCl}_3$ ):  $\delta$  = 13.8, 18.5, 22.1, 30.9, 31.8, 44.9, 65.6, 123.4, 128.6, 128.9, 132.9, 136.6, 139.0, 173.8; IR (neat): 2930, 1736, 1493, 1164, 972, 834  $\text{cm}^{-1}$ ; HRMS (ESI):  $m/z$  calcd for  $\text{C}_{16}\text{H}_{21}\text{ClO}_2$  [ $\text{M}+\text{Na}$ ] $^+$  303.1122. Found 303.1115.

#### (*E*)-hept-2-en-1-yl 2-(4-bromophenyl)propanoate (**1e**)

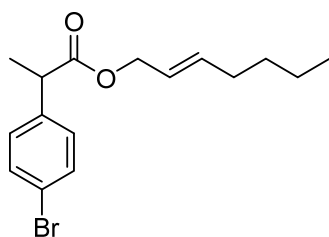

Yield: 69%

$^1\text{H}$  NMR (400 MHz,  $\text{CDCl}_3$ ):  $\delta$  = 0.88 (t,  $J$  = 7.1 Hz, 3H), 1.23-1.36 (m, 4H), 1.47 (d,  $J$  = 7.3 Hz, 3H), 2.01 (dt,  $J$  = 6.9, 6.9 Hz, 2H), 3.68 (q,  $J$  = 7.3 Hz, 1H), 4.45-4.54 (m, 2H), 5.45-5.52 (m, 1H), 5.64-5.72 (m, 1H), 7.18 (d,  $J$  = 8.7 Hz, 2H), 7.44 (d,  $J$  = 8.7 Hz, 2H);  $^{13}\text{C}$  NMR (100 MHz,  $\text{CDCl}_3$ ):  $\delta$  = 13.9, 18.4, 22.1, 30.9, 31.8, 45.0, 65.6, 121.0, 123.4, 129.3, 131.6, 136.7, 139.5, 173.8; IR (neat): 2929, 1735, 1489, 1165, 972, 831  $\text{cm}^{-1}$ ; HRMS (ESI):  $m/z$  calcd for  $\text{C}_{16}\text{H}_{21}\text{BrO}_2$   $[\text{M}+\text{Na}]^+$  347.0617. Found 347.0615.

(*E*)-hept-2-en-1-yl 2-phenylbutanoate (**1p**)

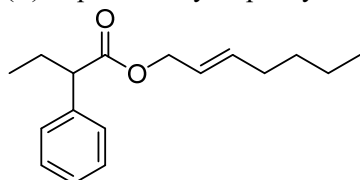

Yield: 70%

$^1\text{H}$  NMR (400 MHz,  $\text{CDCl}_3$ ):  $\delta$  = 0.82-0.87 (m, 6H), 1.19-1.30 (m, 4H), 1.70-1.81 (m, 1H), 1.94-2.11 (m, 3H), 3.41 (t,  $J$  = 7.8 Hz, 1H), 4.40-4.52 (m, 2H), 5.42-5.49 (m, 1H), 5.60-5.68 (m, 1H), 7.18-7.27 (m, 5H);  $^{13}\text{C}$  NMR (125 MHz,  $\text{CDCl}_3$ ):  $\delta$  = 12.1, 13.9, 22.1, 26.8, 30.9, 31.8, 53.5, 65.3, 123.6, 127.1, 128.0, 128.5, 136.4, 139.1, 173.8; IR (neat): 2961, 1734, 1455, 1162, 970, 698  $\text{cm}^{-1}$ ; HRMS (ESI):  $m/z$  calcd for  $\text{C}_{17}\text{H}_{24}\text{O}_2$   $[\text{M}+\text{Na}]^+$  283.1669. Found 283.1665.

(*E*)-hept-2-en-1-yl 2,3-diphenylpropanoate (**1q**)

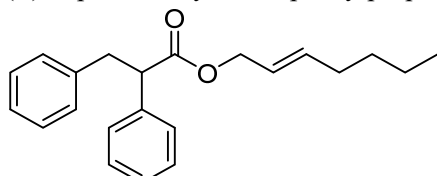

Yield: 62%

$^1\text{H}$  NMR (400 MHz,  $\text{CDCl}_3$ ):  $\delta$  = 0.84 (t,  $J$  = 7.3 Hz, 3H), 1.20-1.28 (m, 4H), 1.93 (dt,  $J$  = 6.7, 6.7 Hz, 2H), 2.98 (dd,  $J$  = 6.9, 13.7 Hz, 1H), 3.37 (dd,  $J$  = 9.2, 13.7 Hz, 1H), 3.82 (dd,  $J$  = 6.9, 9.2 Hz, 1H), 4.38-4.46 (m, 2H), 5.33-5.39 (m, 1H), 5.52-5.58 (m, 1H), 7.07-7.29 (m, 10H);  $^{13}\text{C}$  NMR (100 MHz,  $\text{CDCl}_3$ ):  $\delta$  = 13.9, 22.1, 30.9, 31.8, 39.8, 53.7, 65.5, 123.4, 126.3, 127.3, 128.0, 128.3, 128.6, 129.0, 136.4, 138.7, 139.0, 173.1; IR (neat): 3030, 2927, 1734, 1455, 1150, 971, 698  $\text{cm}^{-1}$ ; HRMS (ESI):  $m/z$  calcd for  $\text{C}_{22}\text{H}_{26}\text{O}_2$   $[\text{M}+\text{Na}]^+$  345.1825. Found 345.1832.

(*E*)-pent-2-en-1-yl 2-phenylpropanoate (**1r** [**1Et**])

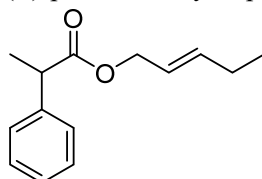

Yield: 89%

$^1\text{H}$  NMR (500 MHz,  $\text{CDCl}_3$ ):  $\delta$  = 0.97 (t,  $J$  = 7.4 Hz, 3H), 1.50 (d,  $J$  = 7.1 Hz, 3H), 2.01-2.06 (m, 2H), 3.73 (q,  $J$  = 7.1 Hz, 1H), 4.46-4.50 (m, 1H), 4.52-4.56 (m, 1H), 5.48-5.51 (m, 1H), 5.70-5.76 (m, 1H), 7.23-7.27 (m, 1H), 7.28-7.34 (m, 4H);  $^{13}\text{C}$  NMR (100 MHz,  $\text{CDCl}_3$ ):  $\delta$  = 13.1, 18.6, 25.2, 45.5, 65.5, 122.6, 127.0, 127.5, 128.5, 137.8, 140.6, 174.3; IR (neat): 2968, 1734, 1455, 1166, 969, 699  $\text{cm}^{-1}$ ; HRMS (ESI):  $m/z$  calcd for  $\text{C}_{14}\text{H}_{18}\text{O}_2$   $[\text{M}+\text{Na}]^+$  241.1199. Found 241.1190.

(*E*)-hex-2-en-1-yl 2-phenylpropanoate (**1s** [**1Pr**])

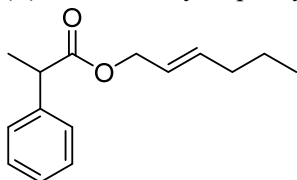

Yield: 85%

$^1\text{H}$  NMR (400 MHz,  $\text{CDCl}_3$ ):  $\delta$  = 0.82 (t,  $J$  = 7.4 Hz, 3H), 1.32 (tq,  $J$  = 7.4, 7.4 Hz, 2H), 1.45 (d,  $J$  = 7.3 Hz, 3H), 1.94 (dt,  $J$  = 7.4, 7.4 Hz, 2H), 3.68 (q,  $J$  = 7.3 Hz, 1H), 4.41-4.51 (m, 2H), 5.41-5.49 (m, 1H), 5.59-5.67 (m, 1H), 7.18-7.22 (m, 1H), 7.25-7.27 (m, 4H);  $^{13}\text{C}$  NMR (100 MHz,  $\text{CDCl}_3$ ):  $\delta$  = 13.6, 18.6, 22.0, 34.2, 45.5, 65.5, 123.8, 127.0, 127.5, 128.5, 136.2, 140.6, 174.3; IR (neat): 2959, 1735, 1455, 1165, 972, 698  $\text{cm}^{-1}$ ; HRMS (ESI):  $m/z$  calcd for  $\text{C}_{15}\text{H}_{20}\text{O}_2$   $[\text{M}+\text{Na}]^+$  255.1356. Found 255.1365.

(*E*)-5-phenylpent-2-en-1-yl 2-phenylpropanoate (**1t**)

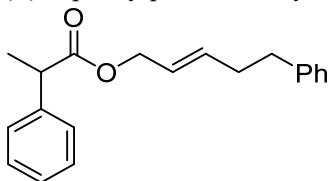

Yield: 72%

$^1\text{H}$  NMR (400 MHz,  $\text{CDCl}_3$ ):  $\delta$  = 1.48 (d,  $J$  = 7.3 Hz, 3H), 2.32 (dt,  $J$  = 7.3, 7.3 Hz, 2H), 2.64 (t,  $J$  = 8.0 Hz, 2H), 3.71 (q,  $J$  = 7.3 Hz, 1H), 4.43-4.54 (m, 2H), 5.48-5.55 (m, 1H), 5.66-5.74 (m, 1H), 7.13-7.19 (m, 3H), 7.24-7.33 (m, 7H);  $^{13}\text{C}$  NMR (125 MHz,  $\text{CDCl}_3$ ):  $\delta$  = 18.6, 34.0, 35.3, 45.5, 65.2, 124.3, 125.9, 127.1, 127.5, 128.3, 128.4, 128.6, 135.0, 140.5, 141.5, 174.3; IR (neat): 2931, 1733, 1456, 1163, 1075, 698  $\text{cm}^{-1}$ ; HRMS (ESI):  $m/z$  calcd for  $\text{C}_{20}\text{H}_{22}\text{O}_2$   $[\text{M}+\text{Na}]^+$  317.1512. Found 317.1497.

(*E*)-7-chlorohept-2-en-1-yl 2-phenylpropanoate (**1u**)

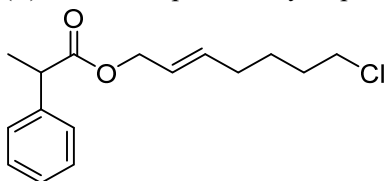

Yield: 75%

$^1\text{H}$  NMR (400 MHz,  $\text{CDCl}_3$ ):  $\delta$  = 1.41-1.49 (m, 5H), 1.65-1.72 (m, 2H), 2.00 (dt,  $J$  = 6.9, 6.9 Hz, 2H), 3.47 (t,  $J$  = 6.9 Hz, 2H), 3.68 (q,  $J$  = 7.3 Hz, 1H), 4.41-4.51 (m, 2H), 5.43-5.51 (m, 1H), 5.56-5.63 (m, 1H), 7.18-7.23 (m, 1H), 7.24-7.30 (m, 4H);  $^{13}\text{C}$  NMR (100 MHz,  $\text{CDCl}_3$ ):  $\delta$  = 18.6, 26.0, 31.3, 31.9, 44.8, 45.5, 65.2, 124.4, 127.1, 127.5, 128.6, 135.2, 140.6, 174.2; IR (neat): 2937, 1733, 1454, 1165, 971, 699  $\text{cm}^{-1}$ ; HRMS (ESI):  $m/z$  calcd for  $\text{C}_{16}\text{H}_{21}\text{ClO}_2$   $[\text{M}+\text{Na}]^+$  303.1122. Found 303.1127.

(*E*)-7-cyanohept-2-en-1-yl 2-phenylpropanoate (**1v**)

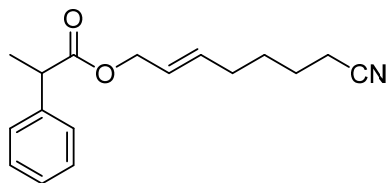

Yield: 34%

$^1\text{H}$  NMR (500 MHz,  $\text{CDCl}_3$ ):  $\delta$  = 1.48-1.64 (m, 7H), 2.06 (dt,  $J$  = 6.9, 6.9 Hz, 2H), 2.32 (t,  $J$  = 7.2 Hz, 2H), 3.73 (q,  $J$  = 7.1 Hz, 1H), 4.47-4.54 (m, 2H), 5.49-5.55 (m, 1H), 5.58-5.64 (m, 1H), 7.24-7.34 (m, 5H);  $^{13}\text{C}$  NMR (125 MHz,  $\text{CDCl}_3$ ):  $\delta$  = 16.9, 18.5, 24.6, 27.6, 31.2, 45.5, 65.0, 119.6, 124.8, 127.1, 127.5, 128.5, 134.4, 140.5, 174.2; IR (neat): 3030, 2936, 2246, 1733, 1454, 1166, 1076, 973, 700  $\text{cm}^{-1}$ ; HRMS (ESI):  $m/z$  calcd for  $\text{C}_{17}\text{H}_{21}\text{NO}_2$   $[\text{M}+\text{Na}]^+$  294.1465. Found 294.1476.

(*E*)-7-azidohept-2-en-1-yl 2-phenylpropanoate (**1w**)

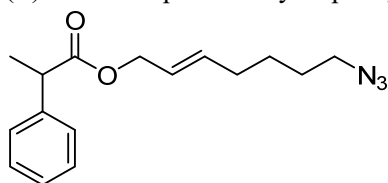

Yield: 62%

$^1\text{H}$  NMR (400 MHz,  $\text{CDCl}_3$ ):  $\delta$  = 1.34-1.42 (m, 2H), 1.45 (d,  $J$  = 7.3 Hz, 3H), 1.48-1.55 (m, 2H), 2.00 (dt,  $J$  = 7.2, 7.2 Hz, 2H), 3.20 (t,  $J$  = 7.2 Hz, 2H), 3.68 (q,  $J$  = 7.3 Hz, 1H), 4.41-4.51 (m, 2H), 5.43-5.50 (m, 1H), 5.56-5.63 (m, 1H), 7.18-7.30 (m, 5H);  $^{13}\text{C}$  NMR (100 MHz,  $\text{CDCl}_3$ ):  $\delta$  = 18.5, 25.8, 28.1, 31.6, 45.5, 51.2, 65.1, 124.4, 127.0, 127.5, 128.5, 135.1, 140.6, 174.2; IR (neat): 2934, 2096, 1733, 1453, 1165, 699  $\text{cm}^{-1}$ ; HRMS (ESI):  $m/z$  calcd for  $\text{C}_{16}\text{H}_{21}\text{N}_3\text{O}_2$   $[\text{M}+\text{Na}]^+$  310.1526. Found 310.1524.

(*E*)-hept-2-en-1-yl 2-(3-benzoylphenyl)propanoate (**1y**)

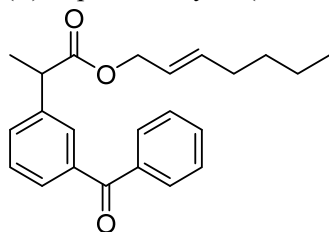

Yield: 85%

$^1\text{H}$  NMR (400 MHz,  $\text{CDCl}_3$ ):  $\delta$  = 0.87 (t,  $J$  = 7.3 Hz, 3H), 1.26-1.34 (m, 4H), 1.53 (d,  $J$  = 7.3 Hz, 3H), 2.01 (dt,  $J$  = 6.7, 6.7 Hz, 2H), 3.80 (q,  $J$  = 7.3 Hz, 1H), 4.48-4.54 (m, 2H), 5.48-5.53 (m, 1H), 5.66-5.72 (m, 1H), 7.42-7.50 (m, 3H), 7.54-7.61 (m, 2H), 7.67-7.69 (m, 1H), 7.75-7.81 (m, 3H);  $^{13}\text{C}$  NMR (125 MHz,  $\text{CDCl}_3$ ):  $\delta$  = 13.9, 18.5, 22.1, 30.9, 31.9, 45.4, 65.7, 123.4, 128.3, 128.5, 129.0, 129.3, 130.1, 131.5, 132.5, 136.7, 137.8, 140.9, 173.9, 196.5; IR (neat): 2930, 1733, 1660, 1448, 1282, 1166, 971, 721  $\text{cm}^{-1}$ ; HRMS (ESI):  $m/z$  calcd for  $\text{C}_{23}\text{H}_{26}\text{O}_3$   $[\text{M}+\text{Na}]^+$  373.1774. Found 373.1780.

**Procedure for preparation of 1b, 1c, 1f-j, 1l, 1m**

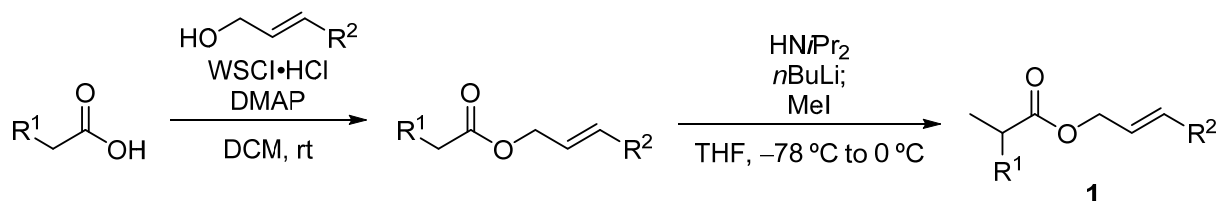

In a flame-dried flask, a solution of carboxylic acid (1.2 equiv) in DCM (ca. 1 M) was cooled to 0 °C. Alcohol (1.0 equiv), WSCI·HCl (1.2 equiv) and DMAP (0.1 equiv) were added sequentially at 0 °C to the solution, and the mixture was stirred at room temperature for overnight. The resulting mixture was diluted with DCM and washed with aqueous HCl (1 M) and saturated NaHCO<sub>3</sub> aq. The combined organic layer was washed with brine, and dried over Na<sub>2</sub>SO<sub>4</sub>. After filtration, the solvent was evaporated under reduced pressure. The residue was purified by silica gel column chromatography to afford allyl carboxylate.

In a flame-dried flask, to a solution of HNiPr<sub>2</sub> (1.2 equiv) in THF (0.2 M) was added *n*BuLi (1.2 equiv, 1.6 M in hexane) dropwise at -78 °C. The reaction mixture was warmed to 0 °C and stirred for 15 min at the temperature. The mixture was cooled to -78 °C again and allyl carboxylate (1.0 equiv) was added. After stirring for 1 h at -78 °C, MeI (3.0 equiv) was added at the same temperature. After stirring at room temperature for 4 h, the reaction was quenched with aqueous HCl (1 M), and products were extracted with EtOAc. The organic layer was washed with H<sub>2</sub>O and brine, and dried over Na<sub>2</sub>SO<sub>4</sub>. After filtration, the solvent was evaporated under reduced pressure. The residue was purified by silica gel column chromatography to afford pure product **1**.

*(E)*-hept-2-en-1-yl 2-(*p*-tolyl)propanoate (**1b**)

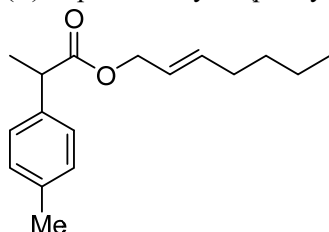

Yield: 32% (2 steps)

<sup>1</sup>H NMR (400 MHz, CDCl<sub>3</sub>): δ = 0.88 (t, *J* = 7.3 Hz, 3H), 1.23-1.37 (m, 4H), 1.48 (d, *J* = 7.3 Hz, 3H), 2.02 (dt, *J* = 6.9, 6.9 Hz, 2H), 2.33 (s, 3H), 3.69 (q, *J* = 7.3 Hz, 1H), 4.44-4.55 (m, 2H), 5.46-5.53 (m, 1H), 5.64-5.71 (m, 1H), 7.13 (d, *J* = 8.2 Hz, 2H), 7.20 (d, *J* = 8.2 Hz, 2H); <sup>13</sup>C NMR (100 MHz, CDCl<sub>3</sub>): δ = 13.9, 18.6, 21.0, 22.1, 31.0, 31.9, 45.1, 65.4, 123.6, 127.3, 129.2, 136.3, 136.6, 137.6, 174.5; IR (neat): 2929, 1735, 1457, 1163, 972, 819 cm<sup>-1</sup>; HRMS (ESI): *m/z* calcd for C<sub>17</sub>H<sub>24</sub>O<sub>2</sub> [M+Na]<sup>+</sup> 283.1669. Found 283.1665.

*(E)*-hept-2-en-1-yl 2-(4-fluorophenyl)propanoate (**1c**)

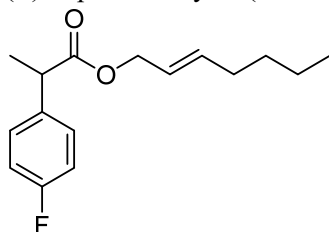

Yield: 44% (2 steps)

<sup>1</sup>H NMR (500 MHz, CDCl<sub>3</sub>): δ = 0.86 (t, *J* = 7.2 Hz, 3H), 1.23-1.34 (m, 4H), 1.46 (d, *J* = 7.1 Hz, 3H), 1.97-2.02 (m, 2H), 3.68 (q, *J* = 7.1 Hz, 1H), 4.45-4.52 (m, 2H), 5.44-5.50 (m, 1H), 5.63-5.69 (m, 1H), 6.96-7.00 (m, 2H), 7.23-7.28 (m, 2H); <sup>13</sup>C NMR (125 MHz, CDCl<sub>3</sub>): δ = 13.8, 18.6, 22.1, 30.9, 31.8, 44.8,

65.5, 115.3 (d,  $J = 20.3$  Hz), 123.5, 129.0 (d,  $J = 8.3$  Hz), 136.2 (d,  $J = 3.6$  Hz), 136.5, 161.9 (d,  $J = 242.2$  Hz), 174.1;  $^{19}\text{F}$  NMR (369 MHz,  $\text{CDCl}_3$ ):  $\delta = -115.77$ ; IR (neat): 2930, 1735, 1509, 1226, 1156, 972, 839  $\text{cm}^{-1}$ ; HRMS (ESI):  $m/z$  calcd for  $\text{C}_{16}\text{H}_{21}\text{FO}_2$   $[\text{M}+\text{Na}]^+$  287.1418. Found 287.1434.

(*E*)-hept-2-en-1-yl 2-(4-iodophenyl)propanoate (**1f**)

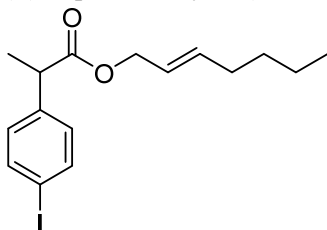

Yield: 59% (2 steps)

$^1\text{H}$  NMR (500 MHz,  $\text{CDCl}_3$ ):  $\delta = 0.89$  (t,  $J = 7.2$  Hz, 3H), 1.26-1.34 (m, 4H), 1.47 (d,  $J = 7.3$  Hz, 3H), 2.02 (dt,  $J = 6.9, 6.9$  Hz, 2H), 3.66 (q,  $J = 7.3$  Hz, 1H), 4.46-4.53 (m, 2H), 5.46-5.51 (m, 1H), 5.65-5.71 (m, 1H), 7.05-7.07 (m, 2H), 7.63-7.65 (m, 2H);  $^{13}\text{C}$  NMR (125 MHz,  $\text{CDCl}_3$ ):  $\delta = 13.9, 18.4, 22.1, 30.9, 31.8, 45.1, 65.6, 92.5, 123.4, 129.5, 136.7, 137.6, 140.2, 173.7$ ; IR (neat): 2928, 1734, 1486, 1164, 1007, 825  $\text{cm}^{-1}$ ; HRMS (ESI):  $m/z$  calcd for  $\text{C}_{16}\text{H}_{21}\text{IO}_2$   $[\text{M}+\text{Na}]^+$  395.0478. Found 395.0495.

(*E*)-hept-2-en-1-yl 2-(4-methoxyphenyl)propanoate (**1g**)

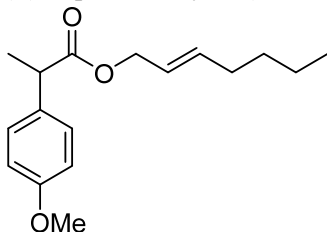

Yield: 39% (2 steps)

$^1\text{H}$  NMR (500 MHz,  $\text{CDCl}_3$ ):  $\delta = 0.90$  (t,  $J = 7.2$  Hz, 3H), 1.28-1.37 (m, 4H), 1.49 (d,  $J = 7.1$  Hz, 3H), 2.04 (dt,  $J = 6.7, 6.7$  Hz, 2H), 3.69 (q,  $J = 7.1$  Hz, 1H), 3.81 (s, 3H), 4.48-4.54 (m, 2H), 5.50-5.54 (m, 1H), 5.67-5.71 (m, 1H), 6.86-6.88 (m, 2H), 7.23-7.26 (m, 2H);  $^{13}\text{C}$  NMR (125 MHz,  $\text{CDCl}_3$ ):  $\delta = 13.9, 18.6, 22.1, 31.0, 31.9, 44.6, 55.2, 65.4, 113.9, 123.6, 128.5, 132.7, 136.3, 158.6, 174.6$ ; IR (neat): 2931, 1734, 1613, 1513, 1248, 1163, 1037, 972, 834  $\text{cm}^{-1}$ ; HRMS (ESI):  $m/z$  calcd for  $\text{C}_{17}\text{H}_{24}\text{O}_3$   $[\text{M}+\text{Na}]^+$  299.1618. Found 299.1618.

(*E*)-hept-2-en-1-yl 2-(4-cyanophenyl)propanoate (**1h**)

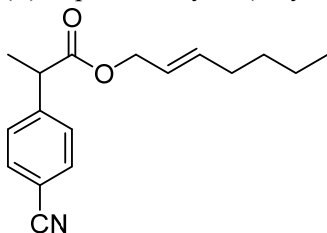

Yield: 23% (2 steps)

$^1\text{H}$  NMR (400 MHz,  $\text{CDCl}_3$ ):  $\delta = 0.88$  (t,  $J = 7.3$  Hz, 3H), 1.23-1.37 (m, 4H), 1.51 (d,  $J = 7.3$  Hz, 3H), 2.02 (dt,  $J = 6.9, 6.9$  Hz, 2H), 3.75-3.80 (m, 1H), 4.46-4.55 (m, 2H), 5.44-5.51 (m, 1H), 5.66-5.73 (m, 1H), 7.42 (d,  $J = 8.5$  Hz, 2H), 7.62 (d,  $J = 8.5$  Hz, 2H);  $^{13}\text{C}$  NMR (100 MHz,  $\text{CDCl}_3$ ):  $\delta = 13.9, 18.3, 22.1, 30.9, 31.8, 45.6, 65.9, 111.1, 118.7, 123.2, 128.4, 132.4, 137.1, 145.9, 173.2$ ; IR (neat): 2931, 2229, 1734, 1457, 1167, 1075, 972, 845  $\text{cm}^{-1}$ ; HRMS (ESI):  $m/z$  calcd for  $\text{C}_{17}\text{H}_{21}\text{NO}_2$   $[\text{M}+\text{Na}]^+$  294.1465. Found 294.1454.

(*E*)-hept-2-en-1-yl 2-(*m*-tolyl)propanoate (**1i**)

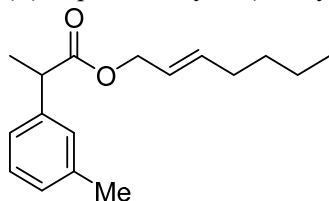

Yield: 32% (2 steps)

<sup>1</sup>H NMR (400 MHz, CDCl<sub>3</sub>): δ = 0.88 (t, *J* = 7.1 Hz, 3H), 1.24-1.36 (m, 4H), 1.48 (d, *J* = 7.3 Hz, 3H), 2.02 (dt, *J* = 6.9, 6.9 Hz, 2H), 2.34 (s, 3H), 3.69 (q, *J* = 7.3 Hz, 1H), 4.45-4.56 (m, 2H), 5.46-5.54 (m, 1H), 5.64-5.72 (m, 1H), 7.06-7.14 (m, 3H), 7.21 (t, *J* = 7.8 Hz, 1H); <sup>13</sup>C NMR (100 MHz, CDCl<sub>3</sub>): δ = 13.9, 18.6, 21.4, 22.1, 31.0, 31.9, 45.4, 65.4, 123.6, 124.5, 127.8, 128.2, 128.4, 136.3, 138.2, 140.7, 174.4; IR (neat): 2929, 1736, 1457, 1176, 971, 700 cm<sup>-1</sup>; HRMS (ESI): *m/z* calcd for C<sub>17</sub>H<sub>24</sub>O<sub>2</sub> [M+Na]<sup>+</sup> 283.1669. Found 283.1665.

(*E*)-hept-2-en-1-yl 2-(3-fluorophenyl)propanoate (**1j**)

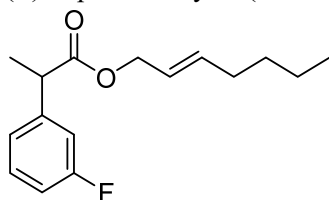

Yield: 46% (2 steps)

<sup>1</sup>H NMR (400 MHz, CDCl<sub>3</sub>): δ = 0.88 (t, *J* = 7.1 Hz, 3H), 1.25-1.35 (m, 4H), 1.49 (d, *J* = 7.3 Hz, 3H), 2.02 (dt, *J* = 6.9, 6.9 Hz, 2H), 3.72 (q, *J* = 7.3 Hz, 1H), 4.50-4.54 (m, 2H), 5.46-5.53 (m, 1H), 5.66-5.73 (m, 1H), 6.92-6.97 (m, 1H), 7.01-7.04 (m, 1H), 7.07 (d, *J* = 7.8 Hz, 1H), 7.25-7.30 (m, 1H); <sup>13</sup>C NMR (100 MHz, CDCl<sub>3</sub>): δ = 13.8, 18.4, 22.1, 30.9, 31.8, 45.2, 65.6, 114.0 (d, *J* = 21.0 Hz), 114.5 (d, *J* = 21.9 Hz), 123.2, 123.3 (d, *J* = 17.2 Hz), 129.9 (d, *J* = 8.6 Hz), 136.7, 142.9 (d, *J* = 7.6 Hz), 162.8 (d, *J* = 24.9 Hz), 173.7; <sup>19</sup>F NMR (369 MHz, CDCl<sub>3</sub>): δ = -113.15; IR (neat): 2931, 1736, 1450, 1176, 972, 780 cm<sup>-1</sup>; HRMS (ESI): *m/z* calcd for C<sub>16</sub>H<sub>21</sub>FO<sub>2</sub> [M+Na]<sup>+</sup> 287.1418. Found 287.1434.

(*E*)-hept-2-en-1-yl 2-(naphthalen-2-yl)propanoate (**1l**)

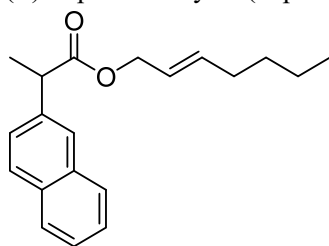

Yield: 57% (2 steps)

<sup>1</sup>H NMR (500 MHz, CDCl<sub>3</sub>): δ = 0.86 (t, *J* = 7.2 Hz, 3H), 1.24-1.33 (m, 4H), 1.60 (d, *J* = 7.0 Hz, 3H), 2.00 (dt, *J* = 6.9, 6.9 Hz, 2H), 3.90 (q, *J* = 7.0 Hz, 1H), 4.49-4.57 (m, 2H), 5.48-5.53 (m, 1H), 5.65-5.70 (m, 1H), 7.44-7.49 (m, 3H), 7.75 (s, 1H), 7.80-7.82 (m, 3H); <sup>13</sup>C NMR (125 MHz, CDCl<sub>3</sub>): δ = 13.8, 18.6, 22.1, 30.9, 31.8, 45.6, 65.5, 123.5, 125.7, 125.8, 126.1, 126.1, 127.6, 127.8, 128.2, 132.5, 133.4, 136.5, 138.0, 174.3; IR (neat): 2929, 2871, 1733, 1456, 1179, 971, 746 cm<sup>-1</sup>; HRMS (ESI): *m/z* calcd for C<sub>20</sub>H<sub>24</sub>O<sub>2</sub> [M+Na]<sup>+</sup> 319.1669. Found 319.1676.

(*E*)-hept-2-en-1-yl 2-(thiophen-3-yl)propanoate (**1m**)



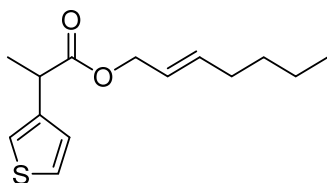

Yield: 56% (2 steps)

$^1\text{H}$  NMR (500 MHz,  $\text{CDCl}_3$ ):  $\delta$  = 0.89 (t,  $J$  = 6.9 Hz, 3H), 1.27-1.37 (m, 4H), 1.51 (d,  $J$  = 7.0 Hz, 3H), 2.03 (dt,  $J$  = 6.7, 6.7 Hz, 2H), 3.84 (q,  $J$  = 7.0 Hz, 1H), 4.50-4.53 (m, 2H), 5.49-5.55 (m, 1H), 5.68-5.74 (m, 1H), 7.07 (dd,  $J$  = 2.3, 5.2 Hz, 1H), 7.13 (d,  $J$  = 2.3 Hz, 1H), 7.26-7.27 (m, 1H);  $^{13}\text{C}$  NMR (100 MHz,  $\text{CDCl}_3$ ):  $\delta$  = 13.9, 18.2, 22.1, 31.0, 31.9, 41.0, 65.5, 121.1, 123.5, 125.6, 127.1, 136.5, 140.6, 173.9; IR (neat): 2929, 1736, 1457, 1173, 972, 768  $\text{cm}^{-1}$ ; HRMS (ESI):  $m/z$  calcd for  $\text{C}_{14}\text{H}_{20}\text{O}_2\text{S}$   $[\text{M}+\text{Na}]^+$  275.1076. Found 275.1068.

#### Procedure for preparation of **1k**

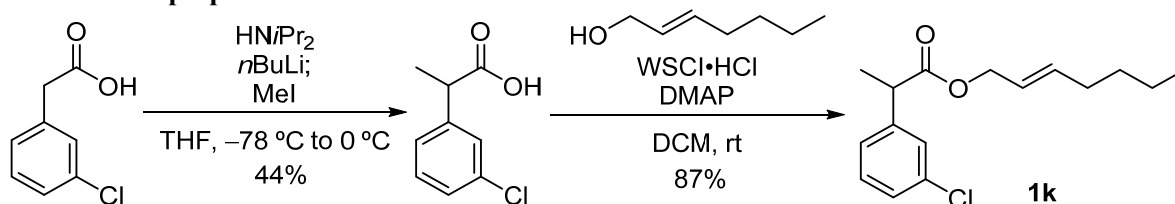

In a flame-dried flask, to a solution of  $\text{HNiPr}_2$  (2.5 mL, 17.6 mmol, 1.2 equiv) in THF (88 mL, 0.2 M) was added  $n\text{BuLi}$  (11 mL, 17.6 mmol, 1.2 equiv, 1.6 M in hexane) dropwise at  $-78^\circ\text{C}$ . The reaction mixture was warmed to  $0^\circ\text{C}$  and stirred for 15 min at the temperature. The mixture was cooled to  $-78^\circ\text{C}$  again and 2-(3-chlorophenyl)acetic acid (2.5 g, 14.7 mmol, 1.0 equiv) was added. After stirring for 1 h at  $-78^\circ\text{C}$ , MeI (2.7 mL, 44.1 mmol, 3.0 equiv) was added at the same temperature. After stirring at room temperature for 4 h, the reaction was quenched with aqueous HCl (1 M) and extracted with EtOAc. The combined organic layer was washed with  $\text{H}_2\text{O}$  and brine, and dried over  $\text{MgSO}_4$ . After filtration, the solvent was evaporated under reduced pressure. The residue was purified by silica gel column chromatography to afford 2-(3-chlorophenyl)propanoic acid (1.2 g, 44%).

In a flame-dried flask, a solution of 2-(3-chlorophenyl)propanoic acid (1.2 g, 6.4 mmol, 1.2 equiv) in DCM (ca. 1 M) was cooled to  $0^\circ\text{C}$ . (*E*)-Hept-2-en-1-ol (0.71 mL, 5.3 mmol, 1.0 equiv), WSCI·HCl (1.2 g, 6.4 mmol, 1.2 equiv) and DMAP (64.7 mg, 0.53 mmol, 0.1 equiv) were added sequentially at  $0^\circ\text{C}$  to the solution, and the mixture was stirred at room temperature overnight. The resulting mixture was diluted with DCM and washed with aqueous HCl (1 M) and saturated  $\text{NaHCO}_3$  aq. The organic layer was washed with brine, and dried over  $\text{Na}_2\text{SO}_4$ . After filtration, the solvent was evaporated under reduced pressure. The residue was purified by silica gel column chromatography to afford **1k** (1.30g, 87%).

#### (*E*)-hept-2-en-1-yl 2-(3-chlorophenyl)propanoate (**1k**)

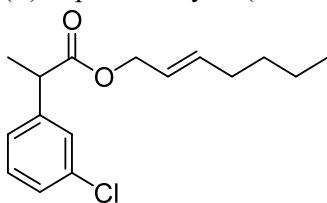

$^1\text{H}$  NMR (500 MHz,  $\text{CDCl}_3$ ):  $\delta$  = 0.91 (t,  $J$  = 7.2 Hz, 3H), 1.28-1.39 (m, 4H), 1.51 (d,  $J$  = 7.3 Hz, 3H), 2.05 (dt,  $J$  = 6.9, 6.9 Hz, 2H), 3.72 (q,  $J$  = 7.3 Hz, 1H), 4.50-4.58 (m, 2H), 5.50-5.55 (m, 1H), 5.69-5.75 (m, 1H), 7.20-7.33 (m, 4H);  $^{13}\text{C}$  NMR (125 MHz,  $\text{CDCl}_3$ ):  $\delta$  = 13.9, 18.4, 22.1, 30.9, 31.9, 45.2, 65.6, 123.4, 125.7, 127.3, 127.7, 129.8, 134.3, 136.7, 142.4, 173.6; IR (neat): 2930, 1736, 1457, 1165, 972, 694  $\text{cm}^{-1}$ ; HRMS (ESI):  $m/z$  calcd for  $\text{C}_{16}\text{H}_{21}\text{ClO}_2$   $[\text{M}+\text{Na}]^+$  303.1122. Found 303.1115.

### Procedure for preparation of **1n**

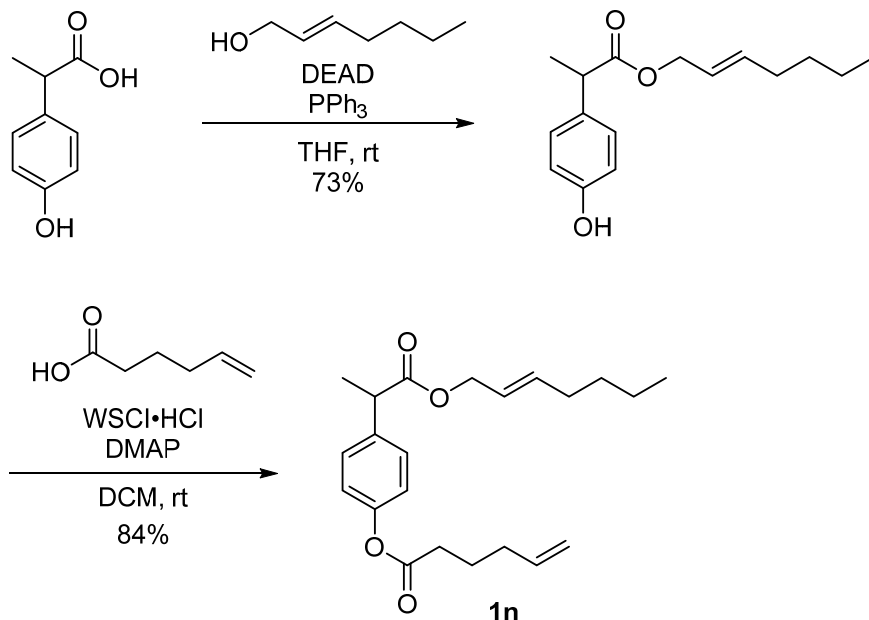

In a flame-dried flask, a solution of 2-(4-hydroxyphenyl)propanoic acid (1.75 g, 10.5 mmol, 1.2 equiv), (*E*)-hept-2-en-1-ol (1.20 mL, 8.76 mmol, 1.0 equiv) and triphenylphosphine (2.76 g, 10.5 mmol, 1.2 equiv) in THF (50 mL) was cooled to 0 °C. Diethyl azodicarboxylate (4.78 mL, 10.5 mmol, 1.2 equiv) was added dropwise at a rate such that the temperature of the reaction mixture was maintained at 0 °C. The solution temperature was allowed to increase at room temperature, and the mixture was stirred for overnight. The reaction mixture was diluted with ether, and washed with saturated NaHCO<sub>3</sub> aq. The organic layer was washed with brine, and dried over Na<sub>2</sub>SO<sub>4</sub>. After filtration, the solvent was evaporated under reduced pressure. The residue was purified by silica gel column chromatography to afford (*E*)-hept-2-en-1-yl 2-(4-hydroxyphenyl)propanoate (1.68 g, 73%).

In a flame-dried flask, a solution of hex-5-enoic acid (148 mg, 1.3 mmol, 1.2 equiv) in DCM (ca. 1 M) was cooled to 0 °C. (*E*)-Hept-2-en-1-yl 2-(4-hydroxyphenyl)propanoate (300 mg, 1.1 mmol, 1.0 equiv), WSCI·HCl (244 mg, 1.3 mmol, 1.2 equiv) and DMAP (13.4 mg, 0.11 mmol, 0.1 equiv) were added sequentially at 0 °C to the solution, and the mixture was stirred at room temperature for overnight. The resulting mixture was diluted with DCM and washed with aqueous HCl (1 M) and saturated NaHCO<sub>3</sub> aq. The organic layer was washed with brine, and dried over Na<sub>2</sub>SO<sub>4</sub>. After filtration, the solvent was evaporated under reduced pressure. The residue was purified by silica gel column chromatography to afford **1n** (333 mg, 84%).

(*E*)-4-(1-(hept-2-en-1-yloxy)-1-oxopropan-2-yl)phenyl hex-5-enoate (**1n**)

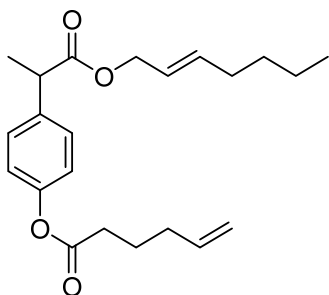

$^1\text{H}$  NMR (500 MHz,  $\text{CDCl}_3$ ):  $\delta$  = 0.88 (t,  $J$  = 7.2 Hz, 3H), 1.25-1.36 (m, 4H), 1.49 (d,  $J$  = 7.2 Hz, 3H), 1.85 (tt,  $J$  = 7.6, 7.6 Hz, 2H), 2.02 (dt,  $J$  = 6.9, 6.9 Hz, 2H), 2.18 (dt,  $J$  = 7.6, 7.6 Hz, 2H), 2.56 (t,  $J$  = 7.6 Hz, 2H), 3.72 (q,  $J$  = 7.2 Hz, 1H), 4.45-4.49 (m, 1H), 4.51-4.55 (m, 1H), 5.02-5.10 (m, 2H), 5.47-5.53 (m, 1H), 5.67-5.72 (m, 1H), 5.78-5.86 (m, 1H), 7.02 (d,  $J$  = 8.6 Hz, 2H), 7.31 (d,  $J$  = 8.6 Hz, 2H);  $^{13}\text{C}$  NMR (125 MHz,  $\text{CDCl}_3$ ):  $\delta$  = 13.8, 18.6, 22.1, 23.9, 30.9, 31.8, 32.9, 33.5, 44.9, 65.5, 115.6, 121.5, 123.5, 128.5, 136.5, 137.4, 137.9, 149.6, 172.0, 174.0; IR (neat): 2931, 1735, 1507, 1204, 914, 847  $\text{cm}^{-1}$ ; HRMS (ESI):  $m/z$  calcd for  $\text{C}_{22}\text{H}_{30}\text{O}_4$   $[\text{M}+\text{Na}]^+$  381.2036. Found 381.2037.

#### Procedure for preparation of 1o

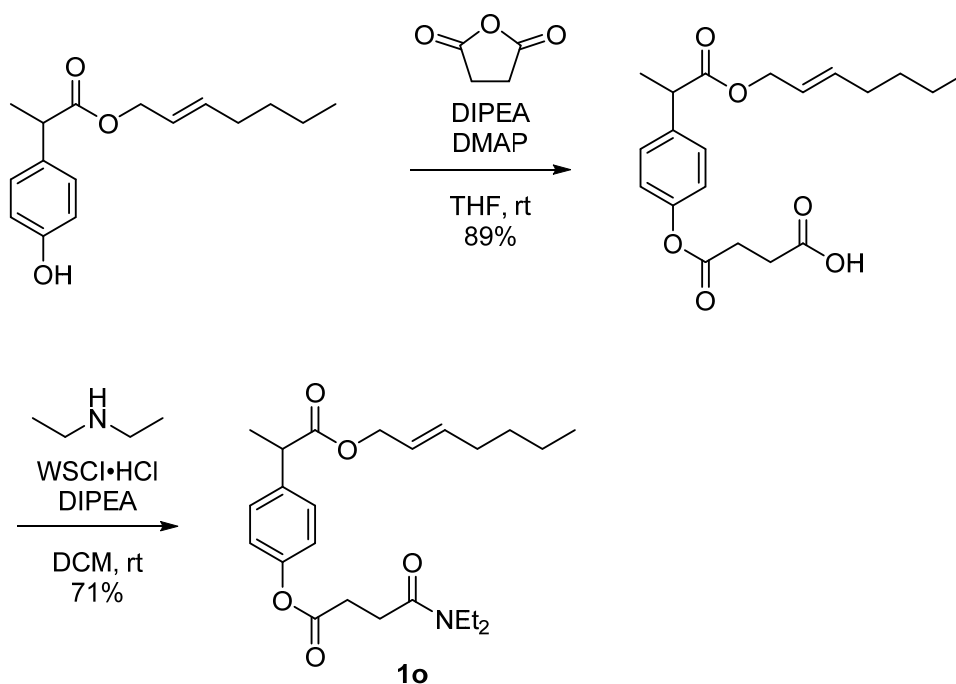

(*E*)-Hept-2-en-1-yl 2-(4-hydroxyphenyl)propanoate (4.0 g, 15.2 mmol, 1 equiv) and succinic anhydride (7.63 mg, 76.2 mmol, 5 equiv) were stirred together in DCM (100 mL) with diisopropylethylamine (5.3 mL, 30.5 mmol, 2.0 equiv) and DMAP (373 mg, 3.05 mmol, 0.2 equiv) at room temperature. After stirring for 2.5 h, the reaction was diluted with  $\text{H}_2\text{O}$ , and products were extracted with EtOAc. The organic layer was washed with  $\text{H}_2\text{O}$  and brine, and dried over  $\text{Na}_2\text{SO}_4$ . After filtration, the solvent was evaporated under reduced pressure. The residue was purified by silica gel column chromatography to afford (*E*)-4-(4-(1-(hept-2-en-1-yloxy)-1-oxopropan-2-yl)phenoxy)-4-oxobutanoic acid (4.92 g, 89%).

In a flame-dried flask, a solution of (*E*)-4-(4-(1-(hept-2-en-1-yloxy)-1-oxopropan-2-yl)phenoxy)-4-oxobutanoic acid (500 mg, 1.4 mmol, 1.2 equiv) in DCM (15 mL) was cooled to 0  $^\circ\text{C}$ . Diethylamine (0.17 mL, 1.7 mmol, 1.0 equiv), WSCI·HCl (320 mg, 1.7 mmol, 1.2 equiv) and diisopropylethylamine

(0.29 mL, 1.7 mmol, 1.2 equiv) were added sequentially at 0 °C to the solution, and the mixture was stirred at room temperature for overnight. The resulting mixture was diluted with DCM and washed with aqueous HCl (1 M) and saturated NaHCO<sub>3</sub> aq. The organic layer was washed with brine, and dried over Na<sub>2</sub>SO<sub>4</sub>. After filtration, the solvent was evaporated under reduced pressure. The residue was purified by silica gel column chromatography to afford **1o** (411.5 mg, 71%) as a colorless oil.

(*E*)-4-(1-(hept-2-en-1-yloxy)-1-oxopropan-2-yl)phenyl 4-(diethylamino)-4-oxobutanoate (**1o**)

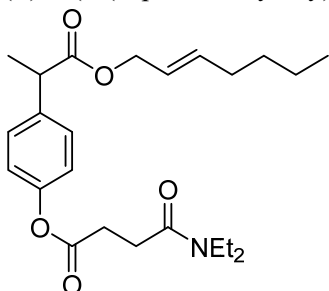

<sup>1</sup>H NMR (500 MHz, CDCl<sub>3</sub>): δ = 0.88 (t, *J* = 6.9 Hz, 3H), 1.12 (t, *J* = 7.1 Hz, 3H), 1.20 (t, *J* = 7.1 Hz, 3H), 1.26-1.35 (m, 4H), 1.48 (d, *J* = 7.1 Hz, 3H), 2.02 (dt, *J* = 6.9, 6.9 Hz, 2H), 2.71 (t, *J* = 6.6 Hz, 2H), 2.92 (t, *J* = 6.6 Hz, 2H), 3.34-3.40 (m, 4H), 3.71 (q, *J* = 7.1 Hz, 1H), 4.44-4.47 (m, 1H), 4.50-4.53 (m, 1H), 5.47-5.51 (m, 1H), 5.67-5.71 (m, 1H), 7.05 (d, *J* = 8.6 Hz, 2H), 7.30 (d, *J* = 8.6 Hz, 2H); <sup>13</sup>C NMR (125 MHz, CDCl<sub>3</sub>): δ = 13.0, 13.8, 14.1, 18.6, 22.1, 27.8, 29.6, 30.9, 31.8, 40.3, 41.8, 44.9, 65.5, 121.6, 123.5, 128.4, 136.5, 137.8, 149.7, 169.9, 171.9, 174.1; IR (neat): 2931, 1733, 1645, 1458, 1205, 1132, 973, 791 cm<sup>-1</sup>; HRMS (ESI): *m/z* calcd for C<sub>24</sub>H<sub>35</sub>NO<sub>5</sub> [M+Na]<sup>+</sup> 440.2407. Found 440.2426.

#### Procedure for preparation of **1x**

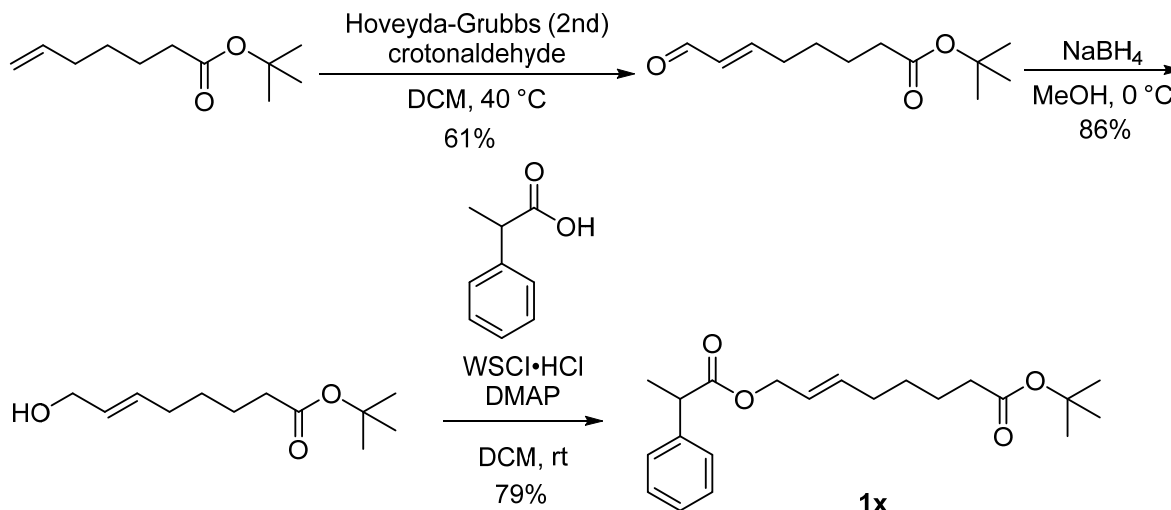

A solution of crotonaldehyde (4.5 mL, 54 mmol, 10 equiv) in DCM (30 mL) was added to a solution of the *tert*-butyl hept-6-enoate (1.0 mg, 5.4 mmol, 1.0 equiv) in DCM (5 mL). Second generation Hoveyda-Grubbs catalyst (100 mg, 0.16 mmol, 0.03 equiv) was added, and the mixture was stirred for 5 h at 40 °C. DMSO (1 mL) was added to the mixture, and the mixture was stirred at room temperature for overnight. Subsequently, the solvent was removed under reduced pressure, and the crude product was purified by silica gel chromatography to yield *tert*-butyl (*E*)-8-oxooct-6-enoate (699 mg, 61% yield).

To a solution of *tert*-butyl (*E*)-8-oxooct-6-enoate (699 mg, 3.29 mmol, 1.0 equiv) in MeOH (20 mL) at 0 °C was added NaBH<sub>4</sub> (155 mg, 3.95 mmol, 1.2 equiv). After stirring for 1 h at 0 °C, the reaction was quenched by the addition of saturated NH<sub>4</sub>Cl aq. Subsequently the mixture was extracted with DCM. The

organic layer was dried over Na<sub>2</sub>SO<sub>4</sub>. After filtration, the solvent was removed under reduced pressure. The residue was purified by silica gel column chromatography to afford *tert*-butyl (*E*)-8-hydroxyoct-6-enoate (604 mg, 86% yield).

In a flame-dried flask, a solution of 2-phenylpropanoic acid (593 mg, 3.95 mmol, 1.2 equiv) in DCM (15 mL) was cooled to 0 °C. *tert*-Butyl (*E*)-8-hydroxyoct-6-enoate (705.3 mg, 3.29 mmol, 1.0 equiv), WSCI·HCl (757 mg, 3.95 mmol, 1.2 equiv) and DMAP (40.2 mg, 0.33 mmol, 0.1 equiv) were added sequentially at 0 °C to the solution, and the mixture was stirred at room temperature for overnight. The resulting mixture was diluted with DCM and washed with aqueous HCl (1 M) and saturated NaHCO<sub>3</sub> aq. The organic layer was washed with brine, and dried over Na<sub>2</sub>SO<sub>4</sub>. After filtration, the solvent was evaporated under reduced pressure. The residue was purified by neural silica gel column chromatography to afford **1x** (895 mg, 79%) as a colorless oil.

*tert*-butyl (*E*)-8-((2-phenylpropanoyl)oxy)oct-6-enoate (**1x**)

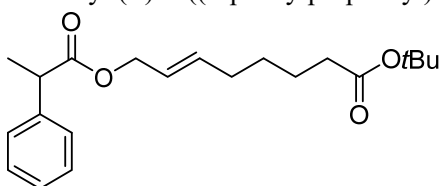

<sup>1</sup>H NMR (500 MHz, CDCl<sub>3</sub>): δ = 1.33-1.41 (m, 2H), 1.44 (s, 9H), 1.50 (d, *J* = 7.3 Hz, 3H), 1.53-1.59 (m, 2H), 2.03 (dt, *J* = 7.1, 7.1 Hz, 2H), 2.19 (t, *J* = 7.4 Hz, 2H), 3.72 (q, *J* = 7.3 Hz, 1H), 4.45-4.55 (m, 2H), 5.48-5.53 (m, 1H), 5.63-5.68 (m, 1H), 7.23-7.26 (m, 1H), 7.29-7.33 (m, 4H); <sup>13</sup>C NMR (125 MHz, CDCl<sub>3</sub>): δ = 18.6, 24.5, 28.1, 28.2, 31.8, 35.3, 45.5, 65.3, 80.0, 124.0, 127.0, 127.5, 128.5, 135.6, 140.6, 173.0, 174.3; IR (neat): 2978, 2934, 1732, 1455, 1153, 972, 699 cm<sup>-1</sup>; HRMS (ESI): *m/z* calcd for C<sub>21</sub>H<sub>30</sub>O<sub>4</sub> [M+Na]<sup>+</sup> 369.2036. Found 369.2024.

#### Procedure for preparation of **1z**

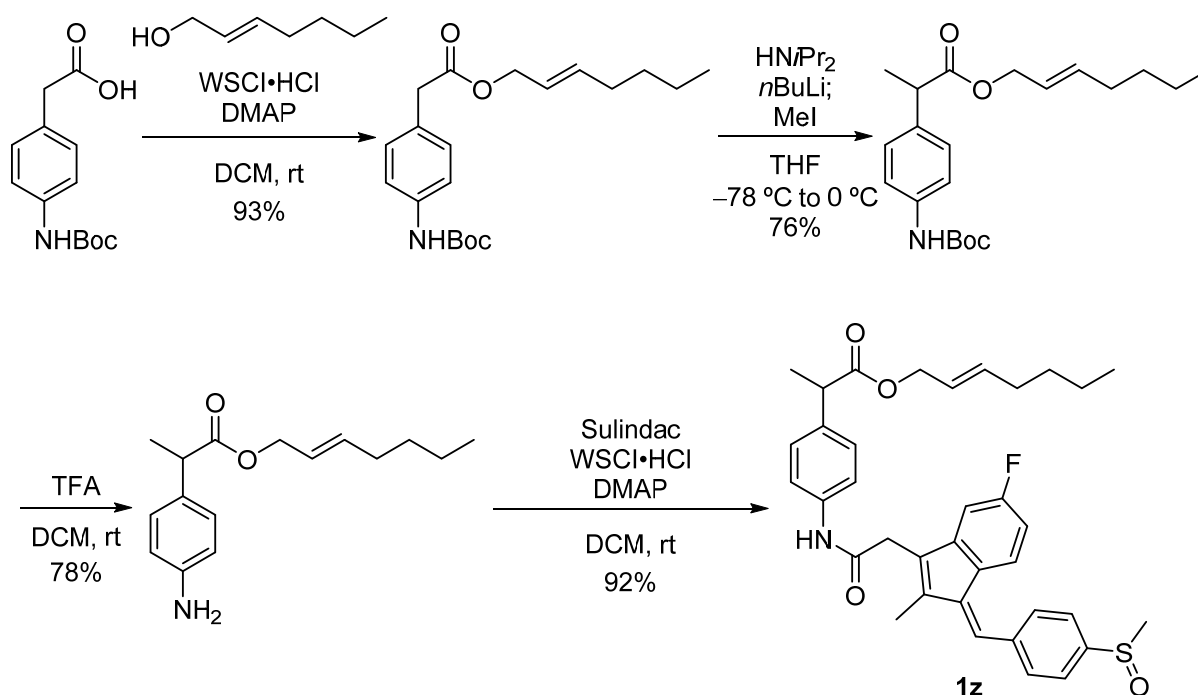

In a flame-dried flask, a solution of 2-(4-((*tert*-butoxycarbonyl)amino)phenyl)acetic acid<sup>1</sup> (9.30 g, 37.0 mmol, 1.05 equiv) in DCM (300 mL) was cooled to 0 °C. (*E*)-hept-2-en-1-ol (4.8 mL, 35.2 mmol, 1.0

equiv), WSCI•HCl (7.09 g, 37.0 mmol, 1.05 equiv) and DMAP (431 mg, 3.52 mmol, 0.1 equiv) were added sequentially at 0 °C to the solution, and the mixture was stirred at room temperature for overnight. The resulting mixture was diluted with DCM and washed with aqueous HCl (1 M) and saturated NaHCO<sub>3</sub> aq. The organic layer was washed with brine, and dried over Na<sub>2</sub>SO<sub>4</sub>. After filtration, the solvent was evaporated under reduced pressure. The residue was purified by neural silica gel column chromatography to afford (*E*)-hept-2-en-1-yl 2-(4-((*tert*-butoxycarbonyl)amino)phenyl)acetate (11.3 g, 93%) as a colorless oil.

In a flame-dried flask, to a solution of HNiPr<sub>2</sub> (10.7 mL, 76.0 mmol, 2.2 equiv) in THF (200 mL) was added *n*BuLi (47.8 mL, 76.0 mmol, 2.2 equiv, 1.6 M in hexane) dropwise at –78 °C. The reaction mixture was warmed to 0 °C and stirred for 15 min at the temperature. The mixture was cooled to –78 °C again and (*E*)-hept-2-en-1-yl 2-(4-((*tert*-butoxycarbonyl)amino)phenyl)acetate (12.0 g, 34.5 mmol, 1.0 equiv) was added. After stirring for 1 h at –78 °C, MeI (2.58 mL, 41.4 mmol, 1.2 equiv) was added at the same temperature. After stirring at room temperature for overnight, the reaction was quenched with aqueous HCl (1 M) and extracted with EtOAc. The combined organic layer was washed with H<sub>2</sub>O and brine, and dried over MgSO<sub>4</sub>. After filtration, the solvent was evaporated under reduced pressure. The residue was purified by silica gel column chromatography to afford (*E*)-hept-2-en-1-yl 2-(4-((*tert*-butoxycarbonyl)amino)phenyl)propanoate (9.53 g, 76%).

(*E*)-hept-2-en-1-yl 2-(4-((*tert*-butoxycarbonyl)amino)phenyl)propanoate (9.53 mL, 26.4 mmol, 1 equiv) was dissolved in DCM (100 mL). TFA (50 mL) was added, and the mixture was stirred for overnight at room temperature. The solvent was removed under reduced pressure, and the crude product was purified by silica gel chromatography to yield (*E*)-hept-2-en-1-yl 2-(4-aminophenyl)propanoate (5.38 g, 78% yield).

In a flame-dried flask, a solution of Sulindac (409 mg, 1.15 mmol, 1.0 equiv) in DCM (5 mL) was cooled to 0 °C. (*E*)-hept-2-en-1-yl 2-(4-aminophenyl)propanoate (300 mg, 1.15 mmol, 1.0 equiv), WSCI•HCl (231 mg, 1.21 mmol, 1.05 equiv), triethylamine (0.32 mL, 2.30 mmol, 2.0 equiv) and DMAP (14.0 mg, 0.115 mmol, 0.1 equiv) were added sequentially at 0 °C to the solution, and the mixture was stirred at room temperature for overnight. The resulting mixture was diluted with DCM and washed with aqueous HCl (1 M) and saturated NaHCO<sub>3</sub> aq. The organic layer was washed with brine, and dried over Na<sub>2</sub>SO<sub>4</sub>. After filtration, the solvent was evaporated under reduced pressure. The residue was purified by neural silica gel column chromatography to afford **1z** (630 mg, 92%) as a yellow powder.

(*E*)-hept-2-en-1-yl 2-(4-(2-(5-fluoro-2-methyl-1-((*Z*)-4-(methylsulfinyl)benzylidene)-1H-inden-3-yl)acetamido)phenyl)propanoate (**1z**)

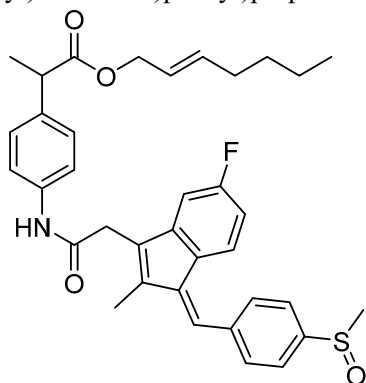

<sup>1</sup>H NMR (400 MHz, CDCl<sub>3</sub>): δ = 0.91 (t, *J* = 7.3 Hz, 3H), 1.26-1.40 (m, 4H), 1.49 (d, *J* = 7.3 Hz, 3H), 2.04 (dt, *J* = 6.9, 6.9 Hz, 2H), 2.27 (s, 3H), 2.87 (s, 3H), 3.67-3.74 (m, 3H), 4.46-4.58 (m, 2H), 5.49-5.56 (m, 1H), 5.68-5.76 (m, 1H), 6.60 (ddd, *J* = 2.3, 8.9, 8.9 Hz, 1H), 6.98 (dd, *J* = 2.3, 9.2 Hz, 1H), 7.20-7.26 (m, 4H), 7.49 (d, *J* = 8.7 Hz, 2H), 7.70 (d, *J* = 8.7 Hz, 2H), 7.77 (d, *J* = 8.7 Hz, 2H), 8.25 (s, 1H); <sup>13</sup>C NMR (100 MHz, CDCl<sub>3</sub>): δ = 10.5, 13.8, 18.4, 22.0, 30.8, 31.7, 34.3, 43.7, 44.8, 65.4, 106.0 (d, *J* = 23.8 Hz), 110.9 (d, *J* = 22.9 Hz), 120.2, 123.5 (d, *J* = 22.9 Hz), 123.7, 127.8, 128.5, 129.4, 129.4, 130.2, 132.3,

132.4, 136.4, 136.6, 138.7, 139.4, 141.4, 145.1, 146.4 (d,  $J = 8.6$  Hz), 163.2 (d,  $J = 250.8$  Hz), 167.7, 174.2;  $^{19}\text{F}$  NMR (369 MHz,  $\text{CDCl}_3$ ):  $\delta = -111.94$ ; IR (neat): 3300, 2929, 1731, 1604, 1538, 1324, 1166,  $855\text{ cm}^{-1}$ ; HRMS (ESI):  $m/z$  calcd for  $\text{C}_{36}\text{H}_{38}\text{FNO}_4\text{S} [\text{M}+\text{Na}]^+$  622.2398. Found 622.2377.

#### Procedure for preparation of **1aa**

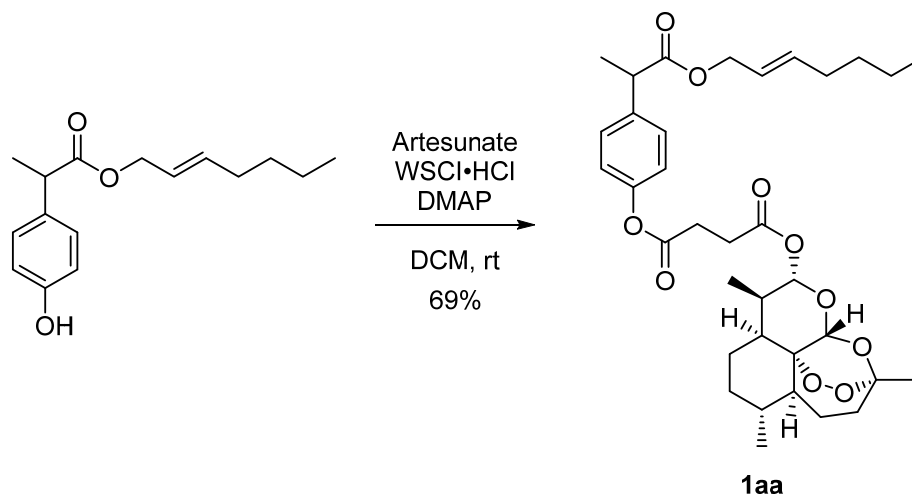

In a flame-dried flask, a solution of Artesunate (586.1 mg, 1.53 mmol, 1.0 equiv) in DCM (10 mL) was cooled to  $0\text{ }^{\circ}\text{C}$ . (*E*)-hept-2-en-1-yl 2-(4-hydroxyphenyl)propanoate (400 mg, 1.53 mmol, 1.0 equiv), WSCI·HCl (351 mg, 1.83 mmol, 1.2 equiv) and DMAP (18.6 mg, 0.153 mmol, 0.1 equiv) were added sequentially at  $0\text{ }^{\circ}\text{C}$  to the solution, and the mixture was stirred at room temperature for overnight. The resulting mixture was diluted with DCM and washed with aqueous HCl (1 M) and saturated  $\text{NaHCO}_3$  aq. The organic layer was washed with brine, and dried over  $\text{Na}_2\text{SO}_4$ . After filtration, the solvent was evaporated under reduced pressure. The residue was purified by silica gel column chromatography to afford **1aa** (664 mg, 69%) as a colorless liquid.

4-(1-(((*E*)-hept-2-en-1-yl)oxy)-1-oxopropan-2-yl)phenyl ((3*R*,5*aS*,6*R*,8*aS*,9*R*,10*S*,12*R*,12*aR*)-3,6,9-trimethyldecahydro-12*H*-3,12-epoxy[1,2]dioxepino[4,3-*i*]isochromen-10-yl) succinate (**1aa**)

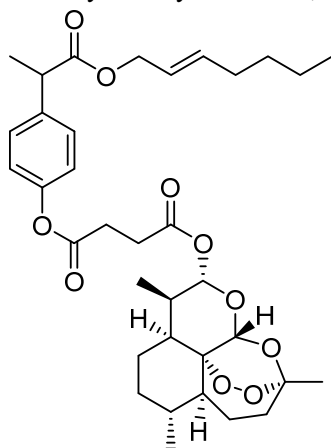

$^1\text{H}$  NMR (400 MHz,  $\text{CDCl}_3$ ):  $\delta = 0.85$  (t,  $J = 8.0$  Hz, 3H), 0.96 (d,  $J = 6.4$  Hz, 3H), 1.25-1.48 (m, 13H), 1.59-1.64 (m, 2H), 1.69-1.79 (m, 2H), 1.84-1.86 (m, 3H), 1.99-2.06 (m, 3H), 2.38 (dt,  $J = 4.1, 14.2$  Hz, 1H), 2.53-2.62 (m, 1H), 2.80-2.99 (m, 4H), 3.68-3.76 (m, 3H), 4.43-4.54 (m, 2H), 5.44-5.53 (m, 2H), 5.65-5.73 (m, 1H), 5.81 (d,  $J = 10.1$  Hz, 1H), 7.04 (d,  $J = 8.7$  Hz, 2H), 7.30 (d,  $J = 8.7$  Hz, 2H);  $^{13}\text{C}$  NMR

(100 MHz, CDCl<sub>3</sub>):  $\delta$  = 11.9, 13.7, 18.5, 20.1, 21.8, 22.0, 24.4, 25.8, 28.9, 29.0, 30.8, 31.6, 31.7, 33.9, 36.0, 37.1, 44.8, 45.0, 51.4, 65.4, 79.9, 91.3, 92.1, 104.3, 121.4, 123.4, 128.4, 136.4, 137.9, 149.4, 170.6, 170.8, 173.9; IR (neat): 2928, 1750, 1507, 1376, 1203, 1138, 1017 cm<sup>-1</sup>; HRMS (ESI):  $m/z$  calcd for C<sub>35</sub>H<sub>48</sub>O<sub>10</sub> [M+Na]<sup>+</sup> 651.3140. Found 651.3121.

#### Procedure for preparation of 1ab

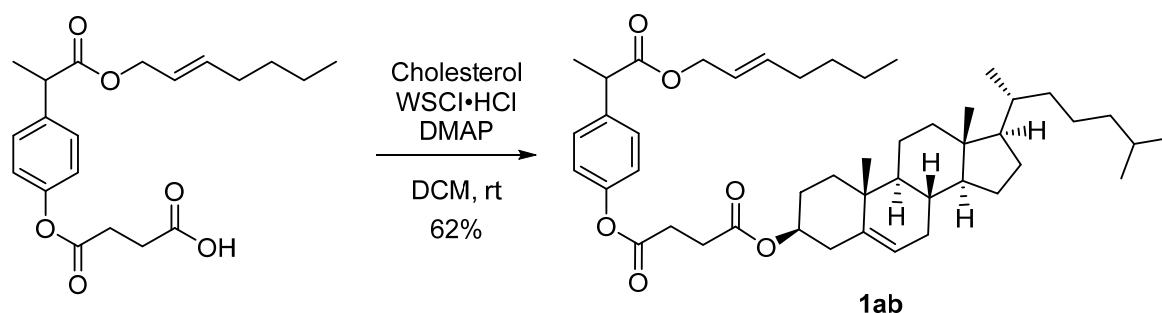

In a flame-dried flask, a solution of (*E*)-4-(4-(1-(hept-2-en-1-yloxy)-1-oxopropan-2-yl)phenoxy)-4-oxobutanoic acid (500 mg, 1.38 mmol, 1.0 equiv) in DCM (10 mL) was cooled to 0 °C. Cholesterol (533 mg, 1.38 mmol, 1.0 equiv), WSCI·HCl (317 mg, 1.66 mmol, 1.2 equiv) and DMAP (16.9 mg, 0.138 mmol, 0.1 equiv) were added sequentially at 0 °C to the solution, and the mixture was stirred at room temperature for overnight. The resulting mixture was diluted with DCM and washed with aqueous HCl (1 M) and saturated NaHCO<sub>3</sub> aq. The organic layer was washed with brine, and dried over Na<sub>2</sub>SO<sub>4</sub>. After filtration, the solvent was evaporated under reduced pressure. The residue was purified by silica gel column chromatography to afford **1ab** (621 mg, 62%) as a white solid.

(3*S*,8*S*,9*S*,10*R*,13*R*,14*S*,17*R*)-10,13-dimethyl-17-((*R*)-6-methylheptan-2-yl)-2,3,4,7,8,9,10,11,12,13,14,15,16,17-tetradecahydro-1*H*-cyclopenta[*a*]phenanthren-3-yl (4-(1-(((*E*)-hept-2-en-1-yl)oxy)-1-oxopropan-2-yl)phenyl) succinate (**1ab**)

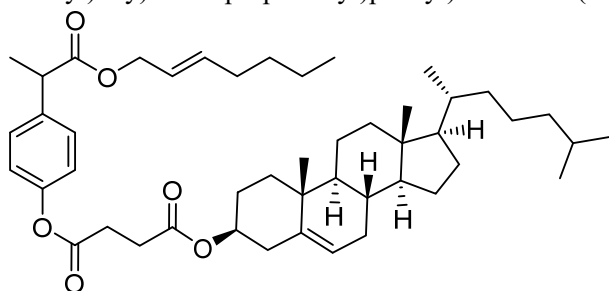

Yield: 62%

<sup>1</sup>H NMR (400 MHz, CDCl<sub>3</sub>):  $\delta$  = 0.67 (s, 3H), 0.85-1.64 (m, 43H), 1.78-1.87 (m, 3H), 1.94-2.05 (m, 4H), 2.32 (d,  $J$  = 7.8 Hz, 2H), 2.71 (t,  $J$  = 6.6 Hz, 2H), 2.86 (t,  $J$  = 6.6 Hz, 2H), 3.65-3.74 (m, 1H), 4.43-4.55 (m, 2H), 4.61-4.68 (m, 1H), 5.36-5.38 (m, 1H), 5.44-5.53 (m, 1H), 5.64-5.73 (m, 1H), 7.04 (d,  $J$  = 8.7 Hz, 2H), 7.30 (d,  $J$  = 8.7 Hz, 2H); <sup>13</sup>C NMR (100 MHz, CDCl<sub>3</sub>):  $\delta$  = 11.8, 13.9, 18.7, 19.3, 21.0, 22.1, 22.5, 22.8, 23.8, 24.2, 26.6, 27.7, 28.0, 28.2, 29.4, 29.4, 30.9, 31.8, 31.9, 35.8, 36.1, 36.5, 36.9, 38.0, 39.5, 39.7, 42.3, 44.9, 50.0, 56.1, 56.6, 65.6, 74.5, 121.5, 122.7, 123.5, 126.8, 128.5, 136.6, 139.5, 149.6, 171.0, 171.4, 174.0; IR (neat): 2935, 2869, 1735, 1467, 1311, 1204, 1137, 1014, 853 cm<sup>-1</sup>; HRMS (ESI):  $m/z$  calcd for C<sub>47</sub>H<sub>70</sub>O<sub>6</sub> [M+Na]<sup>+</sup> 753.5065. Found 753.5075.

#### Procedure for preparation of 1ac



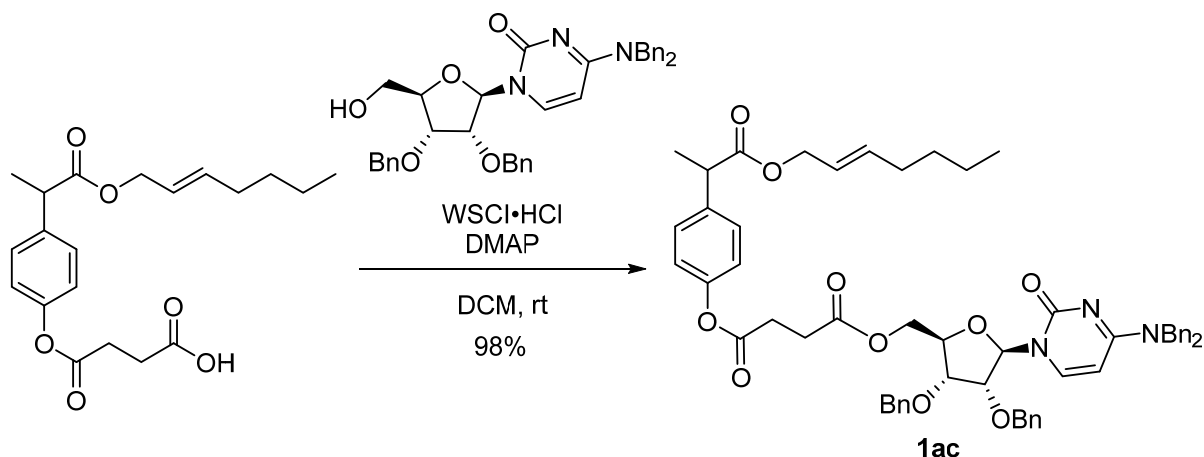

In a flame-dried flask, a solution of (*E*)-4-(4-(1-(hept-2-en-1-yloxy)-1-oxopropan-2-yl)phenoxy)-4-oxobutanoic acid (400 mg, 1.10 mmol, 1.0 equiv) in DCM (8 mL) was cooled to 0 °C. 1-((2*R*,3*R*,4*R*,5*R*)-3,4-bis(benzyloxy)-5-(hydroxymethyl)tetrahydrofuran-2-yl)-4-(dibenzylamino)pyrimidin-2(1*H*)-one (**3I**) (700 mg, 1.16 mmol, 1.05 equiv), WSCI·HCl (254 mg, 1.32 mmol, 1.2 equiv) and DMAP (13.5 mg, 0.11 mmol, 0.1 equiv) were added sequentially at 0 °C to the solution, and the mixture was stirred at room temperature for overnight. The resulting mixture was diluted with DCM and washed with aqueous HCl (1 M) and saturated NaHCO<sub>3</sub> aq. The organic layer was washed with brine, and dried over Na<sub>2</sub>SO<sub>4</sub>. After filtration, the solvent was evaporated under reduced pressure. The residue was purified by silica gel column chromatography to afford **1ac** (1.02g, 98%) as a colorless oil.

((2*R*,3*R*,4*R*,5*R*)-3,4-bis(benzyloxy)-5-(4-(dibenzylamino)-2-oxopyrimidin-1(2*H*)-yl)tetrahydrofuran-2-yl)methyl 4-(1-(((*E*)-hept-2-en-1-yl)oxy)-1-oxopropan-2-yl)phenyl succinate (**1ac**)

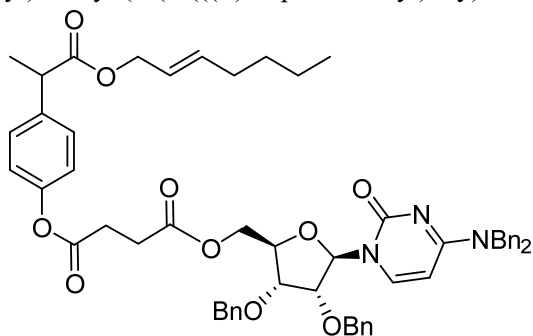

Yield: 98%

<sup>1</sup>H NMR (400 MHz, CDCl<sub>3</sub>): δ = 0.87 (t, *J* = 7.3 Hz, 3H), 1.23-1.37 (m, 4H), 1.44-1.46 (m, 3H), 2.01 (dt, *J* = 6.9, 6.9 Hz, 2H), 2.48-2.62 (m, 2H), 2.79 (t, *J* = 6.9 Hz, 2H), 3.66-3.71 (m, 1H), 3.75 (q, *J* = 4.6 Hz, 1H), 4.17 (d, *J* = 11.9 Hz, 1H), 4.27 (d, *J* = 5.0 Hz, 1H), 4.37-4.54 (m, 9H), 4.93-4.99 (m, 3H), 5.09-5.13 (m, 1H), 5.44-5.52 (m, 1H), 5.65-5.73 (m, 1H), 5.77 (d, *J* = 7.8 Hz, 1H), 5.95 (s, 1H), 6.94-6.97 (m, 2H), 7.09-7.12 (m, 2H), 7.19-7.35 (m, 17H), 7.52-7.54 (m, 2H), 7.65-7.68 (m, 1H); <sup>13</sup>C NMR (100 MHz, CDCl<sub>3</sub>): δ = 13.6, 18.4, 21.8, 21.8, 26.3, 28.4, 28.7, 30.6, 31.6, 44.6, 45.8, 49.7, 50.1, 62.4, 65.2, 71.1, 71.6, 74.4, 78.9, 90.5, 91.2, 120.8, 121.1, 123.2, 126.0, 126.6, 127.3, 127.4, 127.5, 127.6, 128.1, 128.2, 128.3, 128.5, 128.6, 135.6, 136.0, 136.3, 136.7, 137.0, 137.6, 137.9, 140.5, 142.0, 149.2, 155.0, 164.0, 170.5, 171.2, 173.7; IR (neat): 2929, 1735, 1654, 1497, 1205, 1139, 736, 699 cm<sup>-1</sup>; HRMS (ESI): *m/z* calcd for C<sub>57</sub>H<sub>61</sub>N<sub>3</sub>O<sub>10</sub> [M+Na]<sup>+</sup> 970.4249. Found 970.4263.

### Procedure for preparation of **1ad**

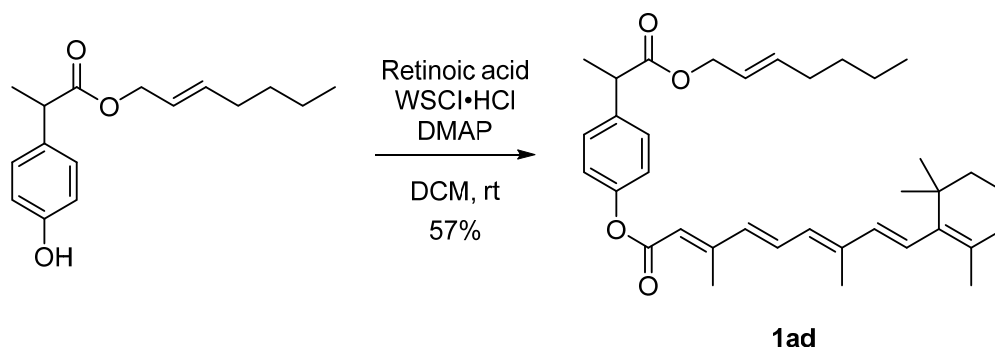

In a flame-dried flask, a solution of Retinoic acid (458.1 mg, 1.53 mmol, 1.0 equiv) in DCM (10 mL) was cooled to 0 °C. (*E*)-hept-2-en-1-yl 2-(4-hydroxyphenyl)propanoate (400 mg, 1.53 mmol, 1.0 equiv), WSCI·HCl (351 mg, 1.83 mmol, 1.2 equiv) and DMAP (18.6 mg, 0.153 mmol, 0.1 equiv) were added sequentially at 0 °C to the solution, and the mixture was stirred at room temperature for overnight. The resulting mixture was diluted with DCM and washed with aqueous HCl (1 M) and saturated NaHCO<sub>3</sub> aq. The organic layer was washed with brine, and dried over Na<sub>2</sub>SO<sub>4</sub>. After filtration, the solvent was evaporated under reduced pressure. The residue was purified by silica gel column chromatography to afford **1ad** (474 mg, 57%) as a yellow liquid.

4-(1-(((*E*)-hept-2-en-1-yl)oxy)-1-oxopropan-2-yl)phenyl (2*E*,4*E*,6*E*,8*E*)-3,7-dimethyl-9-(2,6,6-trimethylcyclohex-1-en-1-yl)nona-2,4,6,8-tetraenoate (**1ad**)

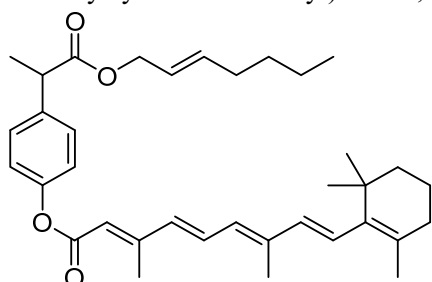

<sup>1</sup>H NMR (400 MHz, CDCl<sub>3</sub>): δ = 0.88 (t, *J* = 7.3 Hz, 3H), 1.04 (s, 6H), 1.24-1.37 (m, 4H), 1.46-1.50 (m, 5H), 1.58-1.65 (m, 2H), 1.72 (s, 3H), 1.83-1.87 (m, 2H), 1.99-2.04 (m, 5H), 2.40 (s, 3H), 3.73-3.75 (m, 1H), 4.44-4.55 (m, 2H), 5.46-5.54 (m, 1H), 5.66-5.74 (m, 1H), 5.98 (s, 1H), 6.14-6.20 (m, 2H), 6.29-6.39 (m, 2H), 7.05-7.11 (m, 3H), 7.32 (d, *J* = 8.7 Hz, 2H); <sup>13</sup>C NMR (100 MHz, CDCl<sub>3</sub>): δ = 12.9, 13.8, 14.0, 18.6, 19.1, 21.7, 22.1, 28.9, 30.9, 31.8, 33.1, 34.2, 39.5, 44.9, 65.5, 117.1, 121.8, 123.5, 128.4, 129.0, 129.4, 130.1, 131.9, 134.7, 136.5, 137.1, 137.6, 137.6, 140.3, 149.7, 155.5, 165.4, 174.1; IR (neat): 2931, 1733, 1507, 1457, 1203, 1165 cm<sup>-1</sup>; HRMS (ESI): *m/z* calcd for C<sub>36</sub>H<sub>48</sub>O<sub>4</sub> [M+Na]<sup>+</sup> 567.3445. Found 567.3452.

### 3. General Procedure for the Reaction Conditions

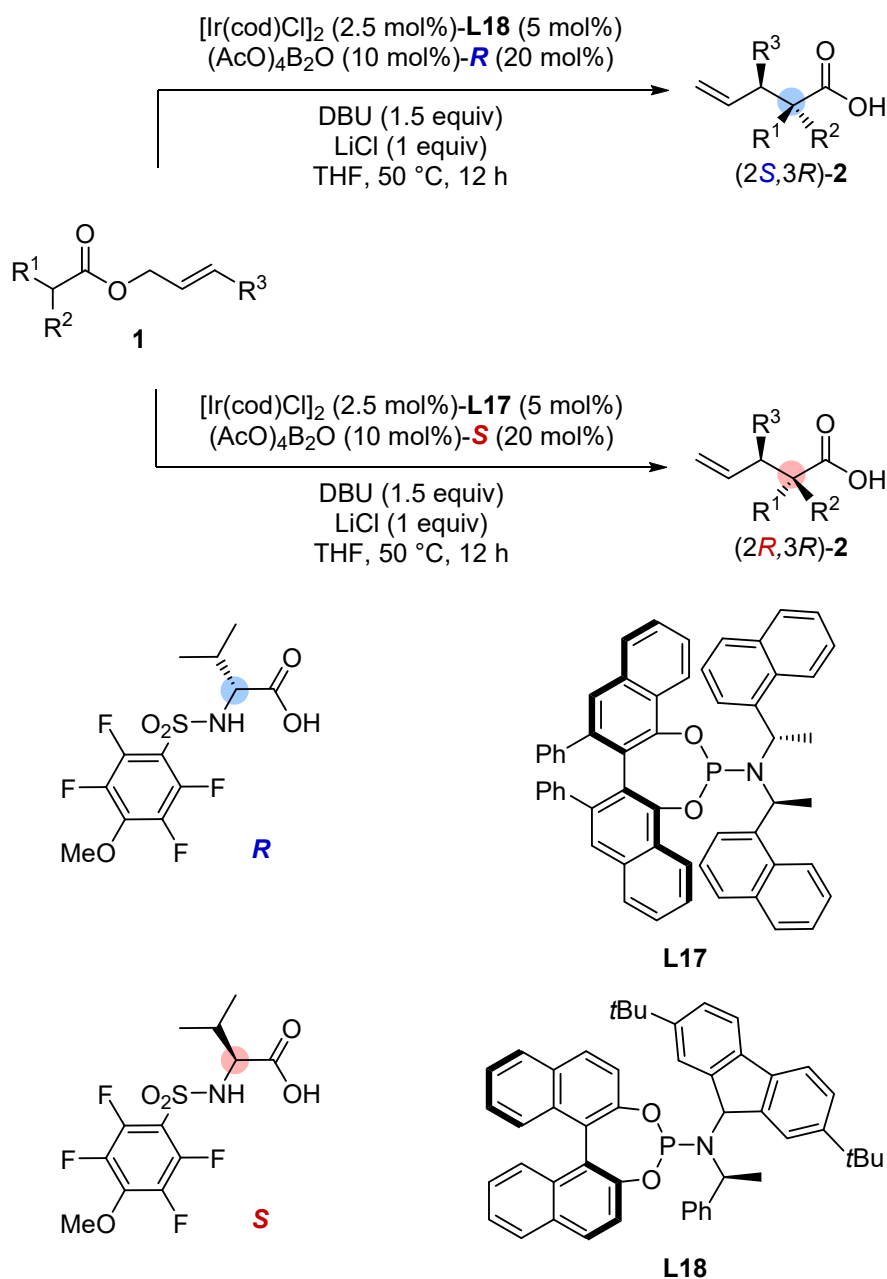

A flame-dried 10 ml test tube A, equipped with a magnetic stirring bar, was charged with  $[\text{Ir}(\text{cod})\text{Cl}]_2$  (5.0 mg, 0.0075 mmol, 0.025 equiv), ligand **L17** or **L18** (0.015 mmol, 0.05 equiv), LiCl (12.8 mg, 0.3 mmol, 1 equiv), DBU (67.2  $\mu\text{L}$ , 0.45 mmol, 1.5 equiv), and anhydrous THF (125  $\mu\text{L}$ ). Another flame-dried 10 ml test tube B, equipped with a magnetic stirring bar, was charged with  $(\text{AcO})_4\text{B}_2\text{O}$  (8.2 mg, 0.030 mmol, 0.1 equiv), (*R*)- or (*S*)-((2,3,5,6-tetrafluoro-4-methoxyphenyl)sulfonyl)-valine (**R** or **S**, 21.6 mg, 0.060 mmol, 0.2 equiv), and anhydrous THF (125  $\mu\text{L}$ ). After stirring the solution in test tube A for 1 h at 50 °C and stirring the solution in test tube B for 1 h at room temperature, the solution in test tube B and allyl ester **1** (0.30 mmol, 1 equiv) were added sequentially to the test tube A. The reaction mixture

was stirred for 12 h at 50 °C under argon atmosphere. The reaction was quenched with aq. HCl (1.0 M) and products were extracted with EtOAc. The organic layer was washed with aqueous HCl (1.0 M), dried over Na<sub>2</sub>SO<sub>4</sub>, filtered and concentrated under reduced pressure to afford the crude product. Diastereomeric ratio (dr) and branch/linear (b/l) selectivity were determined by <sup>1</sup>H NMR analysis of crude mixture. The crude product was purified by column chromatography (hexane/EtOAc = 5/1).

**(2*S*,3*R*)-2-methyl-2-phenyl-3-vinylheptanoic acid ((2*S*,3*R*)-**2a**)**

Yield: 82%; <sup>1</sup>H NMR (500 MHz, CDCl<sub>3</sub>): δ = 0.87 (t, *J* = 6.9 Hz, 3H), 1.19-1.45 (m, 6H), 1.54 (s, 3H), 2.86-2.90 (m, 1H), 4.75 (dd, *J* = 18.0, 1.4 Hz, 1H), 4.88 (dd, *J* = 10.3, 1.4 Hz, 1H), 5.32 (ddd, *J* = 18.0, 10.3, 9.2 Hz, 1H), 7.21-7.24 (m, 1H), 7.29-7.32 (m, 2H), 7.40-7.42 (m, 2H); <sup>13</sup>C NMR (125 MHz, CDCl<sub>3</sub>): δ = 14.1, 17.0, 22.6, 30.3, 30.5, 51.2, 53.7, 117.9, 126.7, 126.9, 128.1, 137.1, 141.6, 181.7; IR (neat): 2930, 1697, 1270, 1103, 917, 698 cm<sup>-1</sup>; HPLC (chiral column: CHIRALPAK IG; solvent: hexane/2-propanol = 100/1; flow rate: 1.0 mL/min; detection: at 210 nm; rt): *t*<sub>R</sub> = 12.3 min; HRMS (ESI): *m/z* calcd for C<sub>16</sub>H<sub>22</sub>O<sub>2</sub> [M+Na]<sup>+</sup> 269.1512. Found 269.1521; [α]<sub>D</sub><sup>20</sup> = 59.4 (*c* = 0.47, CHCl<sub>3</sub>).

**(2*R*,3*R*)-2-methyl-2-phenyl-3-vinylheptanoic acid ((2*R*,3*R*)-**2a**)**

Yield: 88%; <sup>1</sup>H NMR (400 MHz, CDCl<sub>3</sub>): δ = 0.78 (t, *J* = 6.9 Hz, 3H), 1.03-1.26 (m, 6H), 1.53 (s, 3H), 2.92-2.96 (m, 1H), 5.11-5.18 (m, 2H), 5.59 (ddd, *J* = 19.2, 10.1, 10.1 Hz, 1H), 7.26 (dd, *J* = 7.6, 7.6 Hz, 1H), 7.34 (dd, *J* = 7.6, 7.6 Hz, 2H), 7.47 (d, *J* = 7.8 Hz, 2H); <sup>13</sup>C NMR (100 MHz, CDCl<sub>3</sub>): δ = 14.0, 17.1, 22.4, 28.2, 30.0, 50.3, 53.9, 118.5, 127.0, 127.2, 128.1, 138.2, 140.9, 181.4; IR (neat): 2933, 1699, 1274, 1134, 921, 697 cm<sup>-1</sup>; HPLC (chiral column: CHIRALPAK IG; solvent: hexane/2-propanol = 100/1; flow rate: 1.0 mL/min; detection: at 210 nm; rt): *t*<sub>R</sub> = 18.4 min; HRMS (ESI): *m/z* calcd for C<sub>16</sub>H<sub>22</sub>O<sub>2</sub> [M+Na]<sup>+</sup> 269.1512. Found 269.1506; [α]<sub>D</sub><sup>20</sup> = 51.4 (*c* = 1.8, CHCl<sub>3</sub>).

**HPLC chart**

**Racemate**

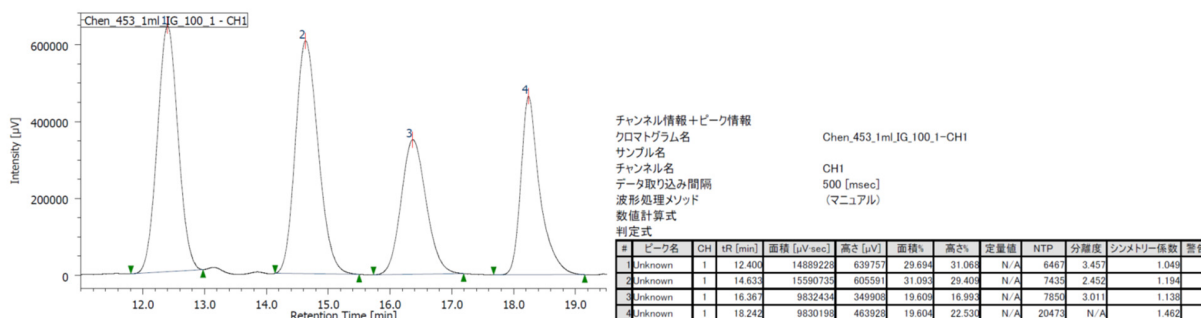

**(2*S*,3*R*)-**2a****

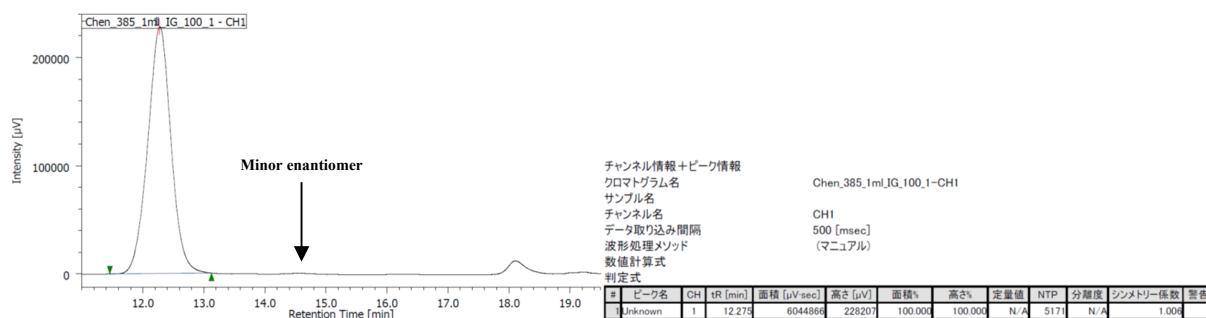

### (2R,3R)-2a

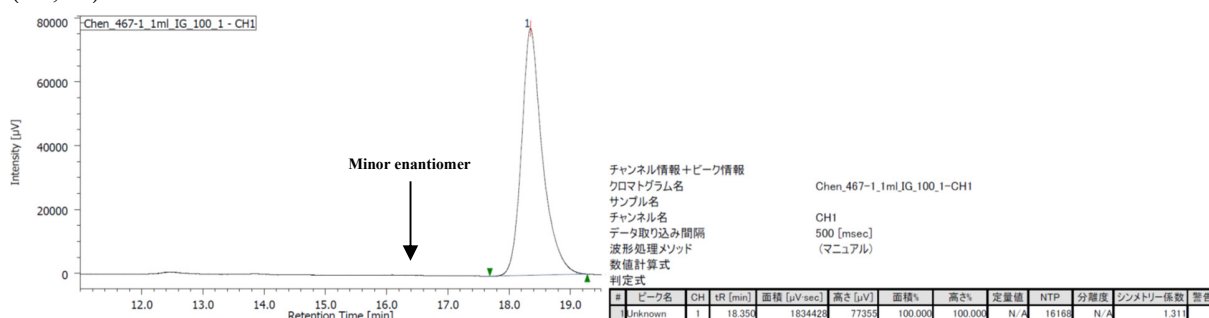

### (2S,3R)-2-methyl-2-(*p*-tolyl)-3-vinylheptanoic acid ((2S,3R)-2b)

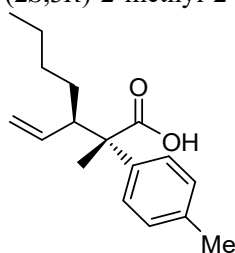

Yield: 84%;  $^1\text{H}$  NMR (400 MHz,  $\text{CDCl}_3$ ):  $\delta$  = 0.87 (t,  $J$  = 6.6 Hz, 3H), 1.20-1.43 (m, 6H), 1.52 (s, 3H), 2.31 (s, 3H), 2.85-2.90 (m, 1H), 4.77 (dd,  $J$  = 18.5, 2.1 Hz, 1H), 4.89 (dd,  $J$  = 10.5, 2.1 Hz, 1H), 5.32 (ddd,  $J$  = 18.5, 10.5, 9.6 Hz, 1H), 7.11 (d,  $J$  = 8.2 Hz, 2H), 7.29 (d,  $J$  = 8.2 Hz, 2H);  $^{13}\text{C}$  NMR (100 MHz,  $\text{CDCl}_3$ ):  $\delta$  = 14.1, 17.0, 20.9, 22.6, 30.3, 30.4, 51.0, 53.3, 117.8, 126.6, 128.8, 136.5, 137.1, 138.6, 181.3; IR (neat): 2928, 1698, 1514, 1270, 1099, 730  $\text{cm}^{-1}$ ; HPLC (chiral column: CHIRALPAK IG; solvent: hexane/2-propanol = 100/1; flow rate: 1.0 mL/min; detection: at 210 nm; rt):  $t_R$  = 13.5 min; HRMS (ESI):  $m/z$  calcd for  $\text{C}_{17}\text{H}_{24}\text{O}_2$   $[\text{M}+\text{Na}]^+$  283.1669. Found 283.1673;  $[\alpha]_D^{20}$  = -20.9 ( $c$  = 0.53,  $\text{CHCl}_3$ ).

### (2R,3R)-2-methyl-2-(*p*-tolyl)-3-vinylheptanoic acid ((2R,3R)-2b)

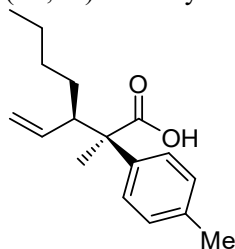

Yield: 75%;  $^1\text{H}$  NMR (500 MHz,  $\text{CDCl}_3$ ):  $\delta$  = 0.78 (t,  $J$  = 7.2 Hz, 3H), 1.00-1.25 (m, 6H), 1.50 (s, 3H), 2.33 (s, 3H), 2.90-2.93 (m, 1H), 5.11-5.16 (m, 2H), 5.58 (ddd,  $J$  = 18.0, 9.0, 9.0 Hz, 1H), 7.13 (d,  $J$  = 8.6 Hz, 2H), 7.33 (d,  $J$  = 8.6 Hz, 2H);  $^{13}\text{C}$  NMR (100 MHz,  $\text{CDCl}_3$ ):  $\delta$  = 14.0, 17.2, 20.9, 22.4, 28.2, 30.0, 50.1, 53.6, 118.4, 127.1, 128.9, 136.6, 137.8, 138.2, 181.7; IR (neat): 2931, 1698, 1514, 1273, 919, 730  $\text{cm}^{-1}$ .

cm<sup>-1</sup>; HPLC (chiral column: CHIRALPAK IG; solvent: hexane/2-propanol = 100/1; flow rate: 1.0 mL/min; detection: at 210 nm; rt):  $t_R$  = 17.2 min; HRMS (ESI):  $m/z$  calcd for C<sub>17</sub>H<sub>24</sub>O<sub>2</sub> [M+Na]<sup>+</sup> 283.1669. Found 283.1676;  $[\alpha]_D^{20}$  = 57.3 ( $c$  = 2.7, CHCl<sub>3</sub>).

### HPLC chart

#### Racemate

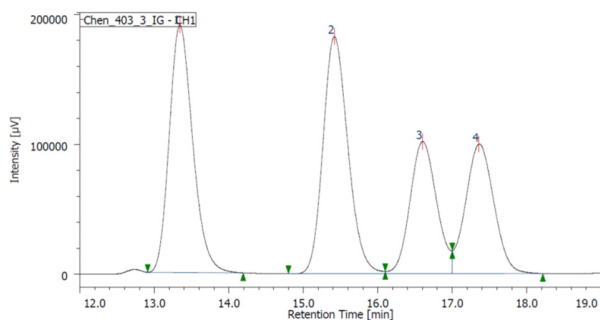

#### チャンネル情報+ピーク情報

クロマトグラム名 Chen\_403\_3\_IG-CHI

サンプル名 CHI

チャンネル名 500 [msec]

データ取り込み間隔

波形処理メソッド (マニュアル)

数値計算式

判定式

| # | ピーク名    | CH | tR [min] | 面積 [μVsec] | 高さ [μV] | 面積%    | 高さ%    | 定量値 | NTP   | 分離度   | シメトリ係数 | 警告 |
|---|---------|----|----------|------------|---------|--------|--------|-----|-------|-------|--------|----|
| 1 | Unknown | 1  | 13.342   | 4161698    | 190363  | 30.735 | 33.153 | N/A | 6776  | 3.534 | 1.216  |    |
| 2 | Unknown | 1  | 15.417   | 4237341    | 162528  | 31.292 | 31.785 | N/A | 10299 | 1.877 | 1.177  |    |
| 3 | Unknown | 1  | 16.600   | 2517596    | 101698  | 16.562 | 17.710 | N/A | 10234 | 1.121 | N/A    |    |
| 4 | Unknown | 1  | 17.358   | 2624255    | 99648   | 19.388 | 17.352 | N/A | 9843  | N/A   | N/A    |    |

#### (2S,3R)-2b

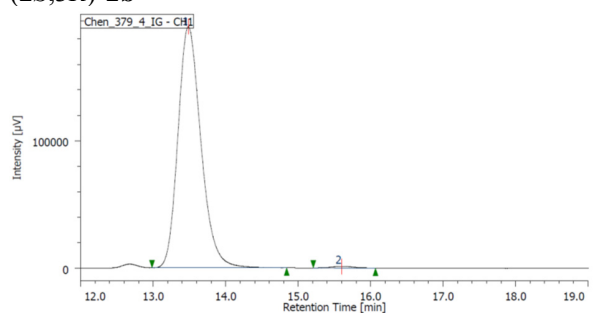

#### チャンネル情報+ピーク情報

クロマトグラム名 Chen\_379\_4\_IG-CHI

サンプル名 CHI

チャンネル名 500 [msec]

データ取り込み間隔

波形処理メソッド (マニュアル)

数値計算式

判定式

| # | ピーク名    | CH | tR [min] | 面積 [μVsec] | 高さ [μV] | 面積%    | 高さ%    | 定量値 | NTP   | 分離度   | シメトリ係数 | 警告 |
|---|---------|----|----------|------------|---------|--------|--------|-----|-------|-------|--------|----|
| 1 | Unknown | 1  | 13.483   | 4173769    | 189478  | 99.286 | 99.297 | N/A | 9020  | 3.635 | 1.227  |    |
| 2 | Unknown | 1  | 15.600   | 30012      | 1341    | 0.714  | 0.703  | N/A | 10826 | N/A   | 1.098  |    |

#### (2R,3R)-2b

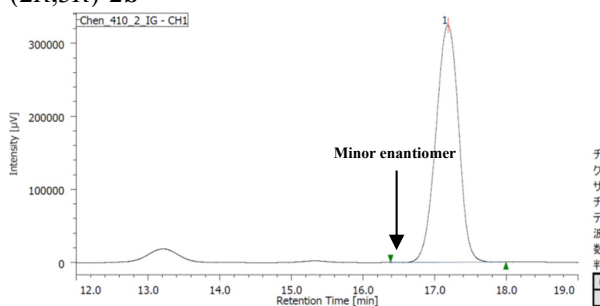

#### チャンネル情報+ピーク情報

クロマトグラム名 Chen\_410\_2\_IG-CHI

サンプル名 CHI

チャンネル名 500 [msec]

データ取り込み間隔

波形処理メソッド (マニュアル)

数値計算式

判定式

| # | ピーク名    | CH | tR [min] | 面積 [μVsec] | 高さ [μV] | 面積%     | 高さ%     | 定量値 | NTP   | 分離度 | シメトリ係数 | 警告 |
|---|---------|----|----------|------------|---------|---------|---------|-----|-------|-----|--------|----|
| 1 | Unknown | 1  | 17.183   | 7114671    | 324556  | 100.000 | 100.000 | N/A | 13673 | N/A | 0.945  |    |

#### (2S,3R)-2-(4-fluorophenyl)-2-methyl-3-vinylheptanoic acid ((2S,3R)-2c)

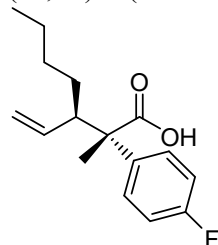

Yield: 81%; <sup>1</sup>H NMR (500 MHz, CDCl<sub>3</sub>): δ = 0.88 (t,  $J$  = 6.9 Hz, 3H), 1.19-1.43 (m, 6H), 1.53 (s, 3H), 2.84-2.88 (m, 1H), 4.73 (dd,  $J$  = 16.9, 1.4 Hz, 1H), 4.89 (dd,  $J$  = 9.5, 1.4 Hz, 1H), 5.29 (ddd,  $J$  = 16.9, 9.5, 8.3 Hz, 1H), 6.97-7.00 (m, 2H), 7.37-7.40 (m, 2H); <sup>13</sup>C NMR (125 MHz, CDCl<sub>3</sub>): δ = 14.0, 16.8, 22.5, 30.2, 30.5, 51.3, 53.2, 114.9 (d,  $J$  = 20.3 Hz), 118.2, 128.5 (d,  $J$  = 7.2 Hz), 136.8, 137.3 (d,  $J$  = 2.4 Hz), 161.7 (d,  $J$  = 246.8 Hz), 181.7; <sup>19</sup>F NMR (369 MHz, CDCl<sub>3</sub>): δ = -115.96; IR (neat): 2932, 1699, 1510,

1237, 919, 830  $\text{cm}^{-1}$ ; HPLC (chiral column: CHIRALPAK IG; solvent: hexane/2-propanol = 100/1; flow rate: 0.30 mL/min; detection: at 254 nm; rt):  $t_R$  = 39.5 min; HRMS (ESI):  $m/z$  calcd for  $\text{C}_{16}\text{H}_{21}\text{FO}_2$   $[\text{M}+\text{Na}]^+$  287.1418. Found 287.1428;  $[\alpha]_D^{20}$  = 47.1 ( $c$  = 1.1,  $\text{CHCl}_3$ ).

(2*R*,3*R*)-2-(4-fluorophenyl)-2-methyl-3-vinylheptanoic acid ((2*R*,3*R*)-**2c**)

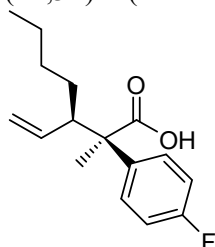

Yield: 76%;  $^1\text{H}$  NMR (500 MHz,  $\text{CDCl}_3$ ):  $\delta$  = 0.78 (t,  $J$  = 6.9 Hz, 3H), 1.01-1.26 (m, 6H), 1.52 (s, 3H), 2.86-2.90 (m, 1H), 5.13-5.17 (m, 2H), 5.55 (ddd,  $J$  = 17.8, 8.6, 8.3 Hz, 1H), 7.00-7.03 (m, 2H), 7.41-7.44 (m, 2H);  $^{13}\text{C}$  NMR (100 MHz,  $\text{CDCl}_3$ ):  $\delta$  = 13.9, 17.2, 22.4, 28.2, 29.9, 50.6, 53.5, 114.9 (d,  $J$  = 21.0 Hz), 118.7, 129.0 (d,  $J$  = 7.6 Hz), 136.5 (d,  $J$  = 3.8 Hz), 137.9, 161.9 (d,  $J$  = 236.5 Hz), 181.6;  $^{19}\text{F}$  NMR (369 MHz,  $\text{CDCl}_3$ ):  $\delta$  = -115.86; IR (neat): 2932, 1700, 1510, 1237, 920, 830  $\text{cm}^{-1}$ ; HPLC (chiral column: CHIRALPAK IG; solvent: hexane/2-propanol = 100/1; flow rate: 0.30 mL/min; detection: at 254 nm; rt):  $t_R$  = 51.8 min; HRMS (ESI):  $m/z$  calcd for  $\text{C}_{16}\text{H}_{21}\text{FO}_2$   $[\text{M}+\text{Na}]^+$  287.1418. Found 287.1410;  $[\alpha]_D^{20}$  = 49.4 ( $c$  = 1.7,  $\text{CHCl}_3$ ).

### HPLC chart

#### Racemate

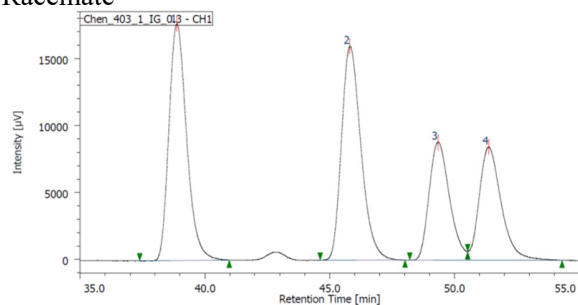

チャンネル情報+ピーク情報

クロマトグラム名

Chen\_403\_1\_IG,0.3-CH1

サンプル名

チャンネル名

CH1

データ取り込み間隔

500 [msec]

波形処理メソッド

(マニュアル)

数値計算式

判定式

| # | ピーク名    | CH | tR [min] | 面積 [μVsec] | 高さ [μV] | 面積%    | 高さ%    | 定量値 | NTP   | 分離度   | シメトリ係数 | 警告 |
|---|---------|----|----------|------------|---------|--------|--------|-----|-------|-------|--------|----|
| 1 | Unknown | 1  | 38.875   | 871027     | 17697   | 31.599 | 34.734 | N/A | 14765 | 5.153 | 1.271  |    |
| 2 | Unknown | 1  | 45.806   | 869504     | 16002   | 31.544 | 31.406 | N/A | 16685 | 2.422 | 1.300  |    |
| 3 | Unknown | 1  | 49.333   | 498776     | 8806    | 18.095 | 17.283 | N/A | 17319 | 1.332 | N/A    |    |
| 4 | Unknown | 1  | 51.367   | 517178     | 8446    | 18.762 | 16.577 | N/A | 17300 | N/A   | N/A    |    |

#### (2*S*,3*R*)-**2c**

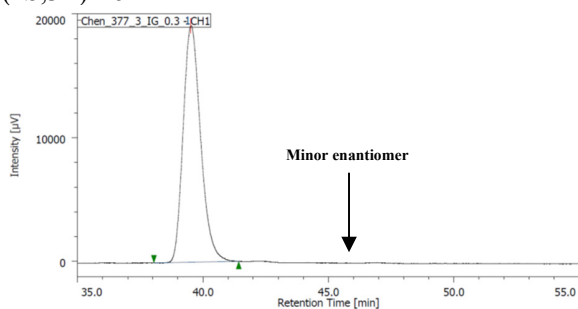

チャンネル情報+ピーク情報

クロマトグラム名

Chen\_377\_3\_IG,0.3-CH1

サンプル名

チャンネル名

CH1

データ取り込み間隔

500 [msec]

波形処理メソッド

(マニュアル)

数値計算式

判定式

| # | ピーク名    | CH | tR [min] | 面積 [μVsec] | 高さ [μV] | 面積%     | 高さ%     | 定量値 | NTP   | 分離度 | シメトリ係数 | 警告 |
|---|---------|----|----------|------------|---------|---------|---------|-----|-------|-----|--------|----|
| 1 | Unknown | 1  | 39.517   | 925751     | 19098   | 100.000 | 100.000 | N/A | 15703 | N/A | 1.261  |    |

#### (2*R*,3*R*)-**2c**

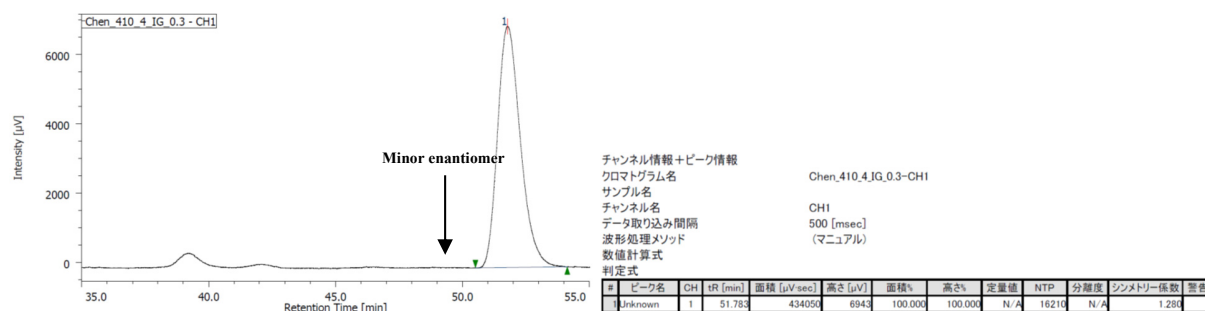

(2*S*,3*R*)-2-(4-chlorophenyl)-2-methyl-3-vinylheptanoic acid ((2*S*,3*R*)-**2d**)

Yield: 87%; <sup>1</sup>H NMR (500 MHz, CDCl<sub>3</sub>): δ = 0.88 (t, *J* = 6.6 Hz, 3H), 1.18-1.45 (m, 6H), 1.52 (s, 3H), 2.82-2.86 (m, 1H), 4.73-4.90 (m, 2H), 5.28 (ddd, *J* = 16.6, 8.6, 8.6 Hz, 1H), 7.27 (d, *J* = 8.6 Hz, 2H), 7.34 (d, *J* = 8.6 Hz, 2H); <sup>13</sup>C NMR (125 MHz, CDCl<sub>3</sub>): δ = 14.0, 16.8, 22.5, 30.2, 30.5, 51.2, 53.4, 118.4, 128.2, 128.2, 132.8, 136.6, 140.1, 181.3; IR (neat): 2931, 1699, 1494, 1270, 1098, 919 cm<sup>-1</sup>; HPLC (chiral column: CHIRALCEL OZ-H; solvent: hexane/2-propanol = 100/1; flow rate: 1.0 mL/min; detection: at 210 nm; rt): *t*<sub>R</sub> = 8.5 min; HRMS (ESI): *m/z* calcd for C<sub>16</sub>H<sub>21</sub>ClO<sub>2</sub> [M+Na]<sup>+</sup> 303.1122. Found 303.1125; [α]<sub>D</sub><sup>20</sup> = 57.5 (*c* = 1.6, CHCl<sub>3</sub>).

(2*R*,3*R*)-2-(4-chlorophenyl)-2-methyl-3-vinylheptanoic acid ((2*R*,3*R*)-**2d**)

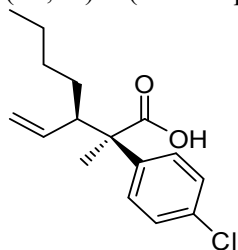

Yield: 91%; <sup>1</sup>H NMR (500 MHz, CDCl<sub>3</sub>): δ = 0.78 (t, *J* = 7.2 Hz, 3H), 1.01-1.28 (m, 6H), 1.51 (s, 3H), 2.85-2.90 (m, 1H), 5.13-5.17 (m, 2H), 5.54 (ddd, *J* = 16.6, 8.6, 8.6 Hz, 1H), 7.30 (d, *J* = 7.7 Hz, 2H), 7.40 (d, *J* = 7.7 Hz, 2H); <sup>13</sup>C NMR (100 MHz, CDCl<sub>3</sub>): δ = 14.0, 17.1, 22.4, 28.3, 29.9, 50.5, 53.7, 118.8, 128.3, 128.8, 133.0, 137.8, 139.3, 181.4; IR (neat): 2932, 1700, 1495, 1276, 1099, 921 cm<sup>-1</sup>; HPLC (chiral column: CHIRALCEL OZ-H; solvent: hexane/2-propanol = 100/1; flow rate: 1.0 mL/min; detection: at 210 nm; rt): *t*<sub>R</sub> = 7.0 min; HRMS (ESI): *m/z* calcd for C<sub>16</sub>H<sub>21</sub>ClO<sub>2</sub> [M+Na]<sup>+</sup> 303.1122. Found 303.1115; [α]<sub>D</sub><sup>20</sup> = 56.7 (*c* = 1.6, CHCl<sub>3</sub>).

HPLC chart

Racemate



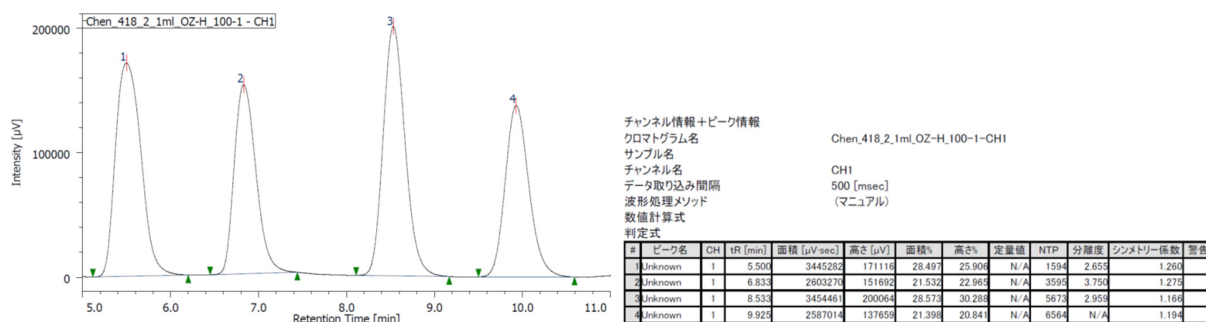

### (2*S*,3*R*)-2d

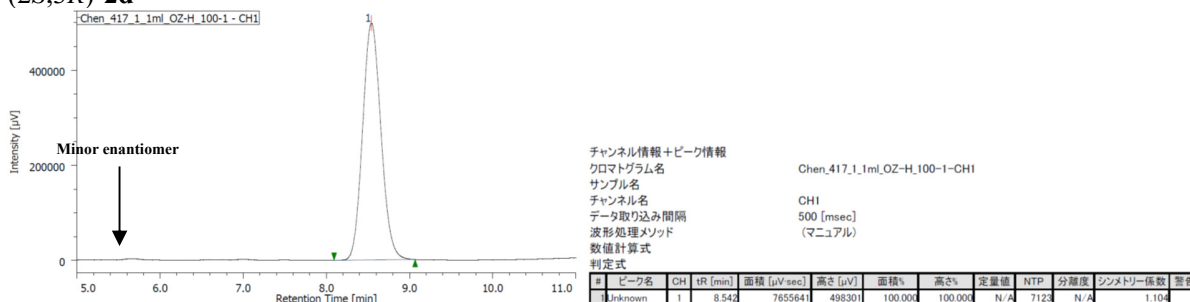

### (2*R*,3*R*)-2d

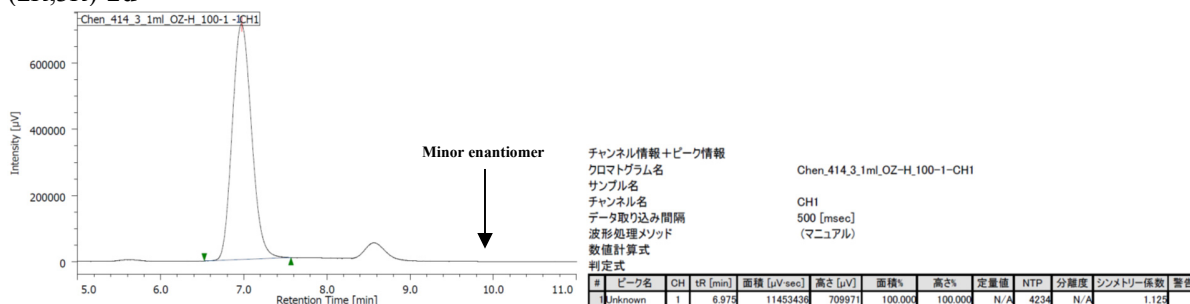

### (2*S*,3*R*)-2-(4-bromophenyl)-2-methyl-3-vinylheptanoic acid ((2*S*,3*R*)-2e)

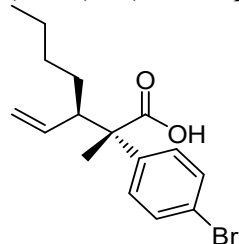

Yield: 90%;  $^1\text{H}$  NMR (500 MHz,  $\text{CDCl}_3$ ):  $\delta$  = 0.87 (t,  $J$  = 6.9 Hz, 3H), 1.18-1.42 (m, 6H), 1.52 (s, 3H), 2.81-2.85 (m, 1H), 4.75 (dd,  $J$  = 17.2, 1.7 Hz, 1H), 4.90 (dd,  $J$  = 9.5, 1.7 Hz, 1H), 5.28 (ddd,  $J$  = 17.2, 9.5, 8.6 Hz, 1H), 7.28 (d,  $J$  = 8.6 Hz, 2H), 7.42 (d,  $J$  = 8.6 Hz, 2H);  $^{13}\text{C}$  NMR (125 MHz,  $\text{CDCl}_3$ ):  $\delta$  = 14.0, 16.7, 22.5, 30.2, 30.5, 51.2, 53.5, 118.5, 121.1, 128.6, 131.2, 136.6, 140.7, 181.3; IR (neat): 2931, 1698, 1491, 1270, 919, 747  $\text{cm}^{-1}$ ; HPLC (chiral column: CHIRALCEL OZ-H; solvent: hexane/2-propanol = 100/1; flow rate: 1.0 mL/min; detection: at 210 nm; rt):  $t_R$  = 8.0 min; HRMS (ESI):  $m/z$  calcd for  $\text{C}_{16}\text{H}_{21}\text{BrO}_2$  [ $\text{M}+\text{Na}$ ] $^+$  347.0617. Found 347.0618;  $[\alpha]_D^{20}$  = 48.9 ( $c$  = 1.8,  $\text{CHCl}_3$ ).

### (2*R*,3*R*)-2-(4-bromophenyl)-2-methyl-3-vinylheptanoic acid ((2*R*,3*R*)-2e)

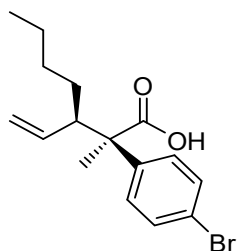

Yield: 95%;  $^1\text{H}$  NMR (500 MHz,  $\text{CDCl}_3$ ):  $\delta$  = 0.78 (t,  $J$  = 7.2 Hz, 3H), 1.04-1.25 (m, 6H), 1.50 (s, 3H), 2.85-2.89 (m, 1H), 5.13-5.16 (m, 2H), 5.54 (ddd,  $J$  = 17.8, 8.6, 8.6 Hz, 1H), 7.33 (d,  $J$  = 8.6 Hz, 2H), 7.45 (d,  $J$  = 8.6 Hz, 2H);  $^{13}\text{C}$  NMR (125 MHz,  $\text{CDCl}_3$ ):  $\delta$  = 14.0, 17.2, 22.4, 28.3, 29.9, 50.4, 53.7, 118.8, 121.3, 129.1, 131.2, 137.7, 140.0, 180.6; IR (neat): 2931, 1699, 1491, 1276, 921, 747  $\text{cm}^{-1}$ ; HPLC (chiral column: CHIRALCEL OZ-H; solvent: hexane/2-propanol = 100/1; flow rate: 1.0 mL/min; detection: at 210 nm; rt):  $t_R$  = 6.3 min; HRMS (ESI):  $m/z$  calcd for  $\text{C}_{16}\text{H}_{21}\text{BrO}_2$   $[\text{M}+\text{Na}]^+$  347.0617. Found 347.0627;  $[\alpha]_D^{20}$  = 55.5 ( $c$  = 0.91,  $\text{CHCl}_3$ ).

## HPLC chart

### Racemate

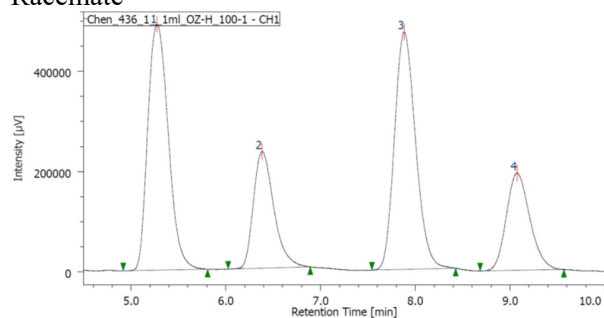

チャンネル情報+ピーク情報  
クロマトグラム名 Chen\_436\_1\_1ml\_OZ-H\_100-1-CH1  
サンプル名 CH1  
チャンネル名 CH1  
データ取り込み間隔 500 [msec]  
波形処理メソッド (マニュアル)  
数値計算式  
判定式

| # | ピーク名    | CH | tR [min] | 面積 [μVsec] | 高さ [μV] | 面積%    | 高さ%    | 定量値 | NTP  | 分離度   | シメトリ係数 | 警告 |
|---|---------|----|----------|------------|---------|--------|--------|-----|------|-------|--------|----|
| 1 | Unknown | 1  | 5.275    | 7348297    | 489590  | 34.233 | 35.266 | N/A | 2746 | 2.815 | 1.250  |    |
| 2 | Unknown | 1  | 6.383    | 3483232    | 232579  | 16.223 | 16.753 | N/A | 4356 | 3.792 | 1.381  |    |
| 3 | Unknown | 1  | 7.883    | 7303881    | 472659  | 34.028 | 34.047 | N/A | 6022 | 2.784 | 1.175  |    |
| 4 | Unknown | 1  | 9.075    | 3328940    | 193436  | 15.509 | 13.934 | N/A | 6449 | N/A   | 1.180  |    |

### (2S,3R)-2e

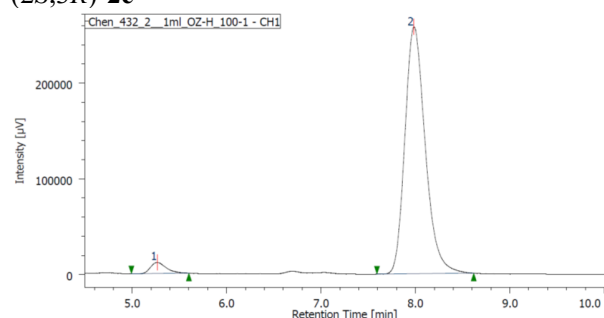

チャンネル情報+ピーク情報  
クロマトグラム名 Chen\_432\_2\_1ml\_OZ-H\_100-1-CH1  
サンプル名 CH1  
チャンネル名 CH1  
データ取り込み間隔 500 [msec]  
波形処理メソッド (マニュアル)  
数値計算式  
判定式

| # | ピーク名    | CH | tR [min] | 面積 [μVsec] | 高さ [μV] | 面積%    | 高さ%    | 定量値 | NTP  | 分離度   | シメトリ係数 | 警告 |
|---|---------|----|----------|------------|---------|--------|--------|-----|------|-------|--------|----|
| 1 | Unknown | 1  | 5.267    | 132654     | 11514   | 3.318  | 4.272  | N/A | 5022 | 7.977 | 1.408  |    |
| 2 | Unknown | 1  | 7.883    | 3863802    | 257998  | 96.681 | 95.728 | N/A | 6855 | N/A   | 1.261  |    |

### (2R,3R)-2e

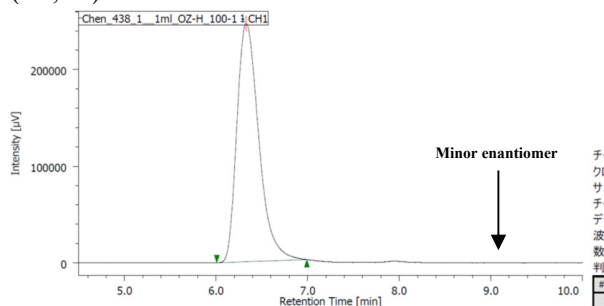

チャンネル情報+ピーク情報  
クロマトグラム名 Chen\_438\_1\_1ml\_OZ-H\_100-1-CH1  
サンプル名 CH1  
チャンネル名 CH1  
データ取り込み間隔 500 [msec]  
波形処理メソッド (マニュアル)  
数値計算式  
判定式

| # | ピーク名    | CH | tR [min] | 面積 [μVsec] | 高さ [μV] | 面積%     | 高さ%     | 定量値 | NTP  | 分離度 | シメトリ係数 | 警告 |
|---|---------|----|----------|------------|---------|---------|---------|-----|------|-----|--------|----|
| 1 | Unknown | 1  | 6.325    | 4095505    | 246463  | 100.000 | 100.000 | N/A | 3436 | N/A | 1.431  |    |

(2S,3R)-2-(4-iodophenyl)-2-methyl-3-vinylheptanoic acid ((2S,3R)-2f)

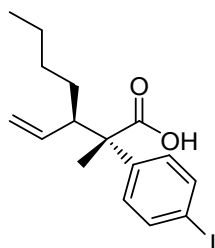

Yield: 75%;  $^1\text{H}$  NMR (400 MHz,  $\text{CDCl}_3$ ):  $\delta$  = 0.87 (t,  $J$  = 6.9 Hz, 3H), 1.17-1.42 (m, 6H), 1.50 (s, 3H), 2.81-2.85 (m, 1H), 4.75 (dd,  $J$  = 18.6, 1.6 Hz, 1H), 4.90 (dd,  $J$  = 10.3, 1.6 Hz, 1H), 5.28 (ddd,  $J$  = 18.6, 10.3, 9.2 Hz, 1H), 7.15 (d,  $J$  = 8.9 Hz, 2H), 7.62 (d,  $J$  = 8.9 Hz, 2H);  $^{13}\text{C}$  NMR (100 MHz,  $\text{CDCl}_3$ ):  $\delta$  = 14.0, 16.7, 22.5, 30.2, 30.5, 51.1, 53.6, 92.7, 118.5, 128.9, 136.6, 137.2, 141.4, 181.2; IR (neat): 2928, 1698, 1270, 1100, 919, 742  $\text{cm}^{-1}$ ; HPLC (chiral column: CHIRALPAK IB N-3; solvent: hexane/2-propanol = 100/1; flow rate: 1.0 mL/min; detection: at 210 nm; rt):  $t_R$  = 12.6 min; HRMS (ESI):  $m/z$  calcd for  $\text{C}_{16}\text{H}_{21}\text{IO}_2$   $[\text{M}+\text{Na}]^+$  395.0478. Found 395.0464;  $[\alpha]_D^{20}$  = 38.6 ( $c$  = 1.3,  $\text{CHCl}_3$ ).

(2R,3R)-2-(4-iodophenyl)-2-methyl-3-vinylheptanoic acid ((2R,3R)-2f)

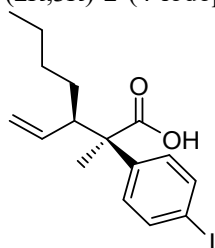

Yield: 81%;  $^1\text{H}$  NMR (400 MHz,  $\text{CDCl}_3$ ):  $\delta$  = 0.78 (t,  $J$  = 6.9 Hz, 3H), 1.00-1.28 (m, 6H), 1.49 (s, 3H), 2.83-2.89 (m, 1H), 5.12-5.16 (m, 2H), 5.48-5.58 (m, 1H), 7.20 (d,  $J$  = 8.7 Hz, 2H), 7.65 (d,  $J$  = 8.7 Hz, 2H);  $^{13}\text{C}$  NMR (100 MHz,  $\text{CDCl}_3$ ):  $\delta$  = 14.0, 17.1, 22.4, 28.3, 29.9, 50.3, 53.8, 92.9, 118.8, 129.4, 137.2, 137.7, 140.6, 181.0; IR (neat): 2931, 1698, 1275, 1004, 920, 742  $\text{cm}^{-1}$ ; HPLC (chiral column: CHIRALPAK IB N-3; solvent: hexane/2-propanol = 100/1; flow rate: 1.0 mL/min; detection: at 210 nm; rt):  $t_R$  = 15.1 min; HRMS (ESI):  $m/z$  calcd for  $\text{C}_{16}\text{H}_{21}\text{IO}_2$   $[\text{M}+\text{Na}]^+$  395.0478. Found 395.0493;  $[\alpha]_D^{20}$  = 50.0 ( $c$  = 1.5,  $\text{CHCl}_3$ ).

HPLC chart

Racemate

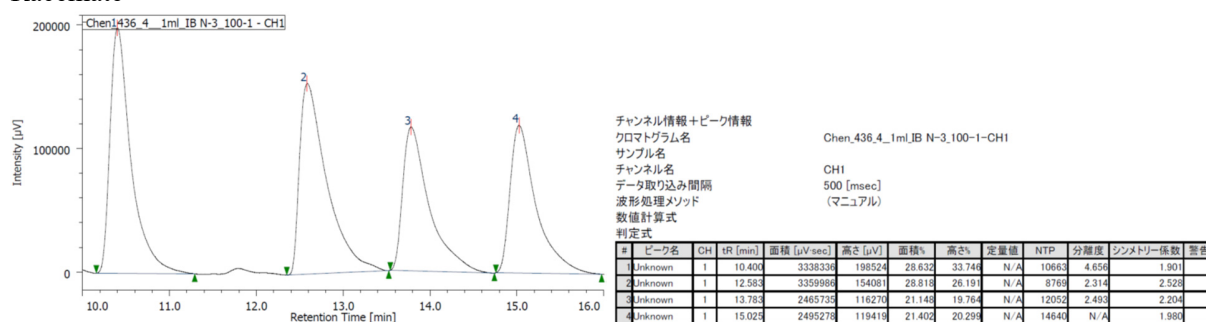

(2S,3R)-2f

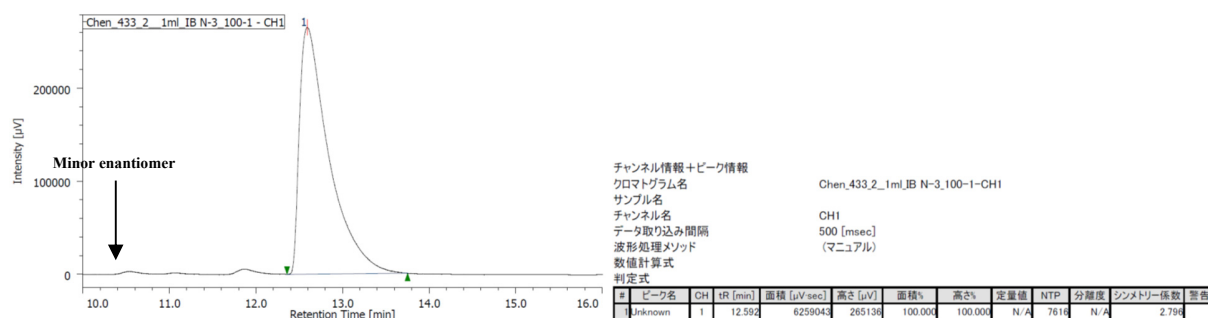

**(2R,3R)-2f**

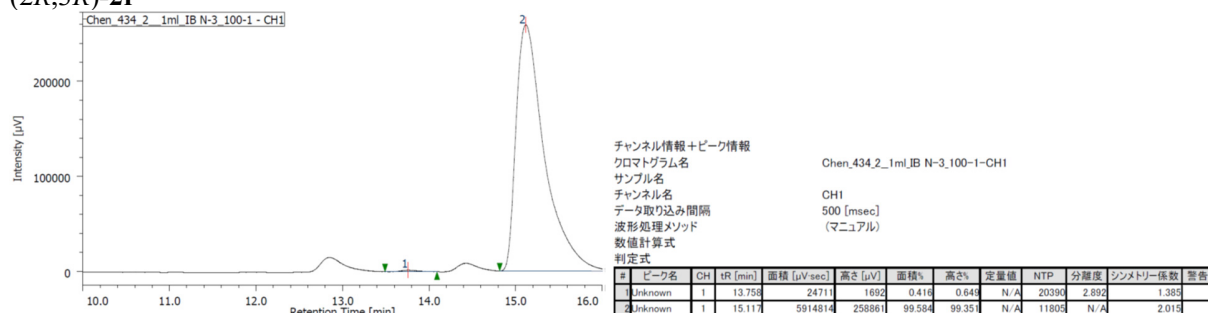

**(2S,3R)-2-(4-methoxyphenyl)-2-methyl-3-vinylheptanoic acid ((2S,3R)-2g)**

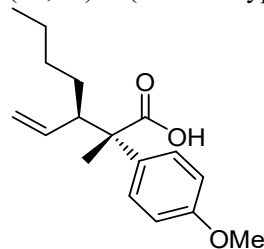

Yield: 50%;  $^1\text{H}$  NMR (400 MHz,  $\text{CDCl}_3$ ):  $\delta$  = 0.88 (t,  $J$  = 6.9 Hz, 3H), 1.19-1.42 (m, 6H), 1.51 (s, 3H), 2.85-2.90 (m, 1H), 3.79 (s, 3H), 4.76 (dd,  $J$  = 18.8, 1.8 Hz, 1H), 4.89 (dd,  $J$  = 10.5, 1.8 Hz, 1H), 5.31 (ddd,  $J$  = 18.8, 10.5, 9.6 Hz, 1H), 6.84 (d,  $J$  = 9.2 Hz, 2H), 7.34 (d,  $J$  = 9.2 Hz, 2H);  $^{13}\text{C}$  NMR (100 MHz,  $\text{CDCl}_3$ ):  $\delta$  = 14.1, 16.8, 22.6, 30.3, 30.5, 51.0, 53.0, 55.1, 113.4, 117.9, 127.9, 133.6, 137.1, 158.3, 181.7; IR (neat): 2932, 1697, 1610, 1513, 1253, 1187, 1036, 917, 826  $\text{cm}^{-1}$ ; HPLC (chiral column: CHIRALCEL OZ-H; solvent: hexane/2-propanol/TFA = 100/1/0.05; flow rate: 2.0 mL/min; detection: at 210 nm; rt):  $t_R$  = 13.2 min; HRMS (ESI):  $m/z$  calcd for  $\text{C}_{17}\text{H}_{24}\text{O}_3$   $[\text{M}+\text{Na}]^+$  299.1618. Found 299.1618;  $[\alpha]_D^{20}$  = 42.3 ( $c$  = 1.4,  $\text{CHCl}_3$ ).

**(2R,3R)-2-(4-methoxyphenyl)-2-methyl-3-vinylheptanoic acid ((2R,3R)-2g)**

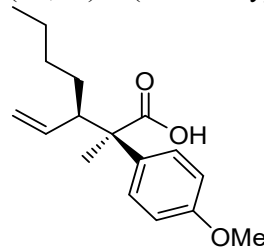

Yield: 80%;  $^1\text{H}$  NMR (500 MHz,  $\text{CDCl}_3$ ):  $\delta$  = 0.78 (t,  $J$  = 6.9 Hz, 3H), 1.00-1.28 (m, 6H), 1.49 (s, 3H), 2.88-2.92 (m, 1H), 3.80 (s, 3H), 5.11-5.16 (m, 2H), 5.57 (ddd,  $J$  = 17.2, 8.6, 8.6 Hz, 1H), 6.86 (d,  $J$  = 8.9 Hz, 2H), 7.38 (d,  $J$  = 8.9 Hz, 2H);  $^{13}\text{C}$  NMR (100 MHz,  $\text{CDCl}_3$ ):  $\delta$  = 14.0, 17.1, 22.4, 28.2, 30.0, 50.3, 53.2, 55.2, 113.4, 118.4, 128.4, 138.2, 138.2, 158.4, 181.5; IR (neat): 2933, 1697, 1609, 1513, 1254, 1187,

1035, 919, 827  $\text{cm}^{-1}$ ; HPLC (chiral column: CHIRALCEL OZ-H; solvent: hexane/2-propanol/TFA = 100/1/0.05; flow rate: 2.0 mL/min; detection: at 210 nm; rt):  $t_R$  = 4.4 min; HRMS (ESI):  $m/z$  calcd for  $\text{C}_{17}\text{H}_{24}\text{O}_3$   $[\text{M}+\text{Na}]^+$  299.1618. Found 299.1618;  $[\alpha]_D^{20}$  = 63.5 ( $c$  = 1.6,  $\text{CHCl}_3$ ).

### HPLC chart

#### Racemate

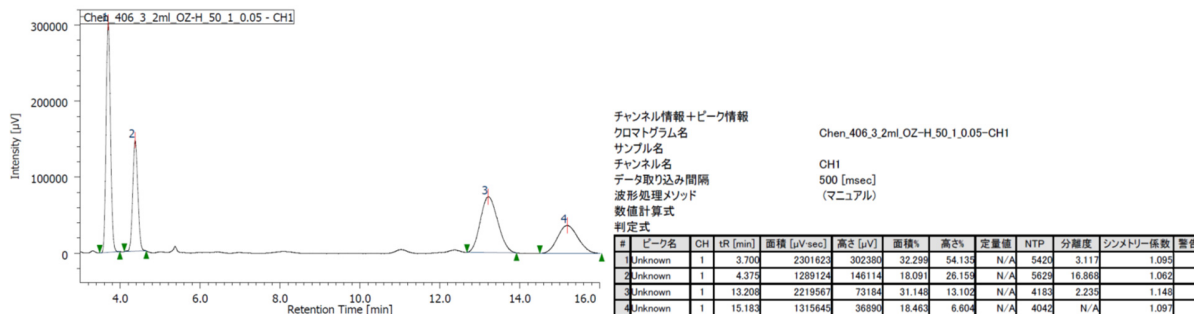

#### (2S,3R)-2g

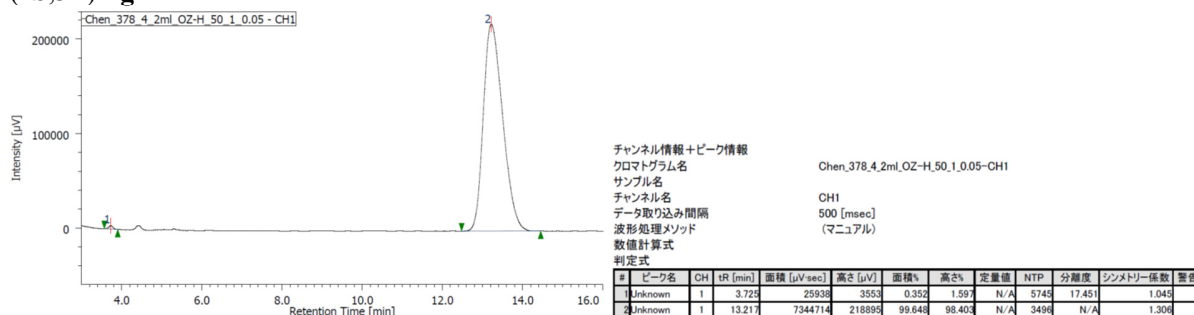

#### (2R,3R)-2g

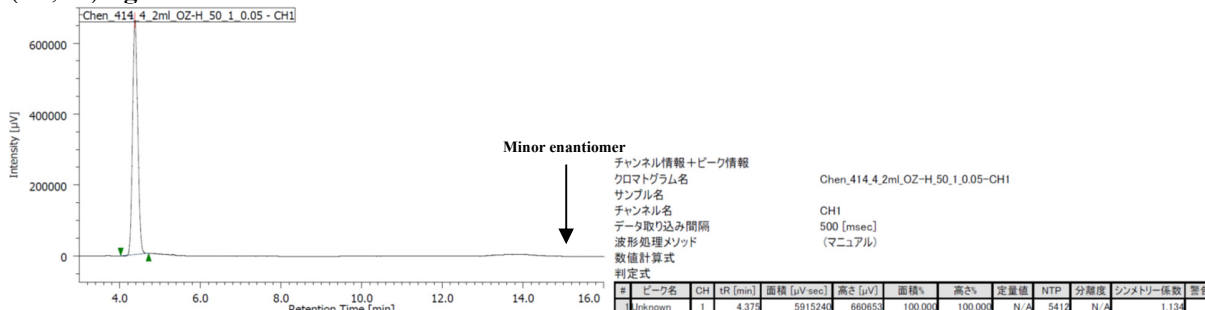

#### (2S,3R)-2-(4-cyanophenyl)-2-methyl-3-vinylheptanoic acid ((2S,3R)-2h)

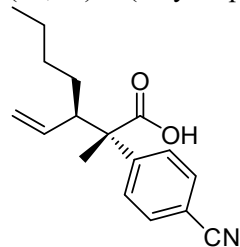

Yield: 87%;  $^1\text{H}$  NMR (400 MHz,  $\text{CDCl}_3$ ):  $\delta$  = 0.87 (t,  $J$  = 6.9 Hz, 3H), 1.17-1.49 (m, 6H), 1.56 (s, 3H), 2.82-2.87 (m, 1H), 4.71 (dd,  $J$  = 17.9, 1.8 Hz, 1H), 4.88 (dd,  $J$  = 9.6, 1.8 Hz, 1H), 5.26 (ddd,  $J$  = 17.9, 9.6, 8.7 Hz, 1H), 7.53 (d,  $J$  = 8.5 Hz, 2H), 7.60 (d,  $J$  = 8.5 Hz, 2H);  $^{13}\text{C}$  NMR (100 MHz,  $\text{CDCl}_3$ ):  $\delta$  = 14.0, 16.7, 22.4, 30.1, 30.5, 51.5, 54.1, 110.9, 118.6, 118.9, 127.7, 131.9, 136.1, 147.0, 180.7; IR (neat): 2931, 2229, 1702, 1466, 1270, 1099, 920, 830  $\text{cm}^{-1}$ ; HPLC (chiral column: CHIRALCEL OZ-H; solvent:

hexane/2-propanol = 100/1; flow rate: 1.0 mL/min; detection: at 210 nm; rt):  $t_R = 30.2$  min; HRMS (ESI):  $m/z$  calcd for  $C_{17}H_{21}NO_2$   $[2M+Na]^+$  565.3037. Found 565.3024;  $[\alpha]_D^{20} = 55.0$  ( $c = 2.1$ ,  $CHCl_3$ ).

(2*R*,3*R*)-2-(4-cyanophenyl)-2-methyl-3-vinylheptanoic acid ((2*R*,3*R*)-**2h**)

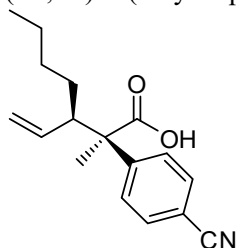

Yield: 86%;  $^1H$  NMR (400 MHz,  $CDCl_3$ ):  $\delta = 0.78$  (t,  $J = 7.1$  Hz, 3H), 1.04-1.39 (m, 6H), 1.55 (s, 3H), 2.86-2.90 (m, 1H), 5.13-5.17 (m, 2H), 5.47-5.56 (m, 1H), 7.58 (d,  $J = 8.7$  Hz, 2H), 7.64 (d,  $J = 8.7$  Hz, 2H);  $^{13}C$  NMR (100 MHz,  $CDCl_3$ ):  $\delta = 13.9$ , 17.3, 22.3, 28.4, 29.8, 50.7, 54.4, 111.0, 118.6, 119.2, 128.2, 131.9, 137.2, 146.2, 180.4; IR (neat): 2932, 2229, 1702, 1458, 1272, 1091, 921, 830  $cm^{-1}$ ; HPLC (chiral column: CHIRALCEL OZ-H; solvent: hexane/2-propanol = 100/1; flow rate: 1.0 mL/min; detection: at 210 nm; rt):  $t_R = 27.5$  min; HRMS (ESI):  $m/z$  calcd for  $C_{17}H_{21}NO_2$   $[M+Na]^+$  294.1465. Found 294.1476;  $[\alpha]_D^{20} = 57.9$  ( $c = 0.55$ ,  $CHCl_3$ ).

HPLC chart

Racemate

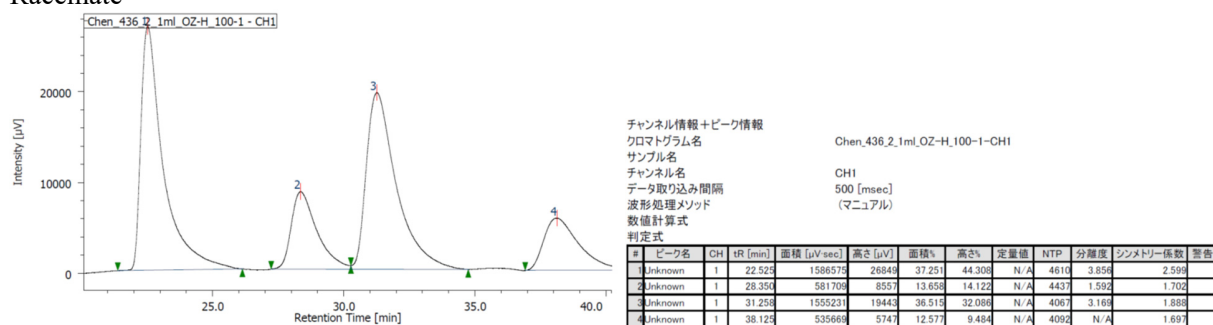

(2*S*,3*R*)-**2h**

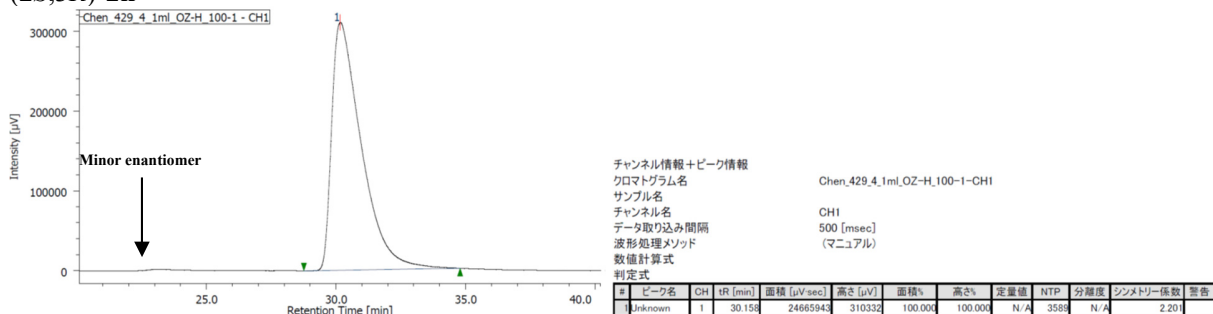

(2*R*,3*R*)-**2h**

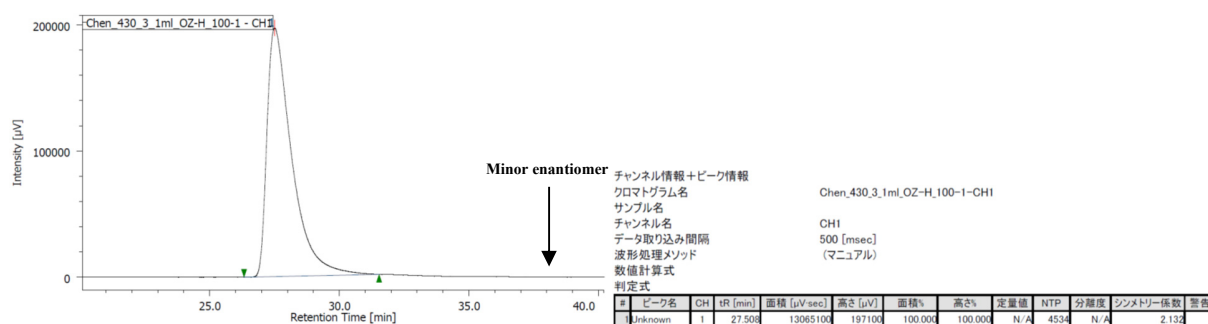

**(2*S*,3*R*)-2-methyl-2-(*m*-tolyl)-3-vinylheptanoic acid ((2*S*,3*R*)-**2i**)**

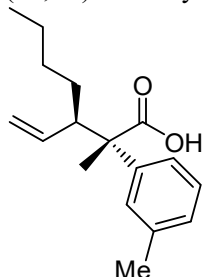

Yield: 80%;  $^1\text{H}$  NMR (400 MHz,  $\text{CDCl}_3$ ):  $\delta$  = 0.88 (t,  $J$  = 6.9 Hz, 3H), 1.15-1.49 (m, 6H), 1.53 (s, 3H), 2.34 (s, 3H), 2.87-2.91 (m, 1H), 4.77 (dd,  $J$  = 18.2, 1.6 Hz, 1H), 4.89 (dd,  $J$  = 10.1, 1.6 Hz, 1H), 5.32 (ddd,  $J$  = 18.2, 10.1, 8.0 Hz, 1H), 7.04-7.05 (m, 1H), 7.20-7.21 (m, 3H);  $^{13}\text{C}$  NMR (100 MHz,  $\text{CDCl}_3$ ):  $\delta$  = 14.1, 17.1, 21.7, 22.6, 30.3, 30.4, 51.0, 53.6, 117.8, 123.8, 127.4, 127.6, 128.0, 137.1, 137.6, 141.5, 181.8; IR (neat): 2930, 1697, 1465, 1270, 916, 723  $\text{cm}^{-1}$ ; HPLC (chiral column: CHIRALCEL OZ-H; solvent: hexane/2-propanol = 100/1; flow rate: 1.0 mL/min; detection: at 210 nm; rt):  $t_R$  = 11.0 min; HRMS (ESI):  $m/z$  calcd for  $\text{C}_{17}\text{H}_{24}\text{O}_2$   $[\text{M}+\text{Na}]^+$  283.1669. Found 283.1673;  $[\alpha]_D^{20}$  = 71.9 ( $c$  = 1.8,  $\text{CHCl}_3$ ).

**(2*R*,3*R*)-2-methyl-2-(*m*-tolyl)-3-vinylheptanoic acid ((2*R*,3*R*)-**2i**)**

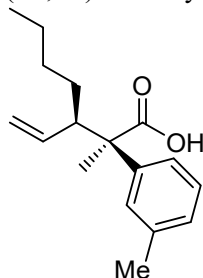

Yield: 69%;  $^1\text{H}$  NMR (500 MHz,  $\text{CDCl}_3$ ):  $\delta$  = 0.79 (t,  $J$  = 6.6 Hz, 3H), 1.02-1.26 (m, 6H), 1.52 (s, 3H), 2.36 (s, 3H), 2.93-2.96 (m, 1H), 5.12-5.18 (m, 2H), 5.60 (ddd,  $J$  = 17.2, 8.4, 8.4 Hz, 1H), 7.08 (d,  $J$  = 6.9 Hz, 1H), 7.20-7.27 (m, 3H);  $^{13}\text{C}$  NMR (125 MHz,  $\text{CDCl}_3$ ):  $\delta$  = 13.9, 17.1, 21.7, 22.3, 28.1, 29.9, 50.1, 53.8, 118.4, 124.3, 127.7, 127.9, 128.0, 137.7, 138.3, 140.8, 181.2; IR (neat): 2930, 1698, 1457, 1273, 920, 721  $\text{cm}^{-1}$ ; HPLC (chiral column: CHIRALCEL OZ-H; solvent: hexane/2-propanol = 100/1; flow rate: 1.0 mL/min; detection: at 210 nm; rt):  $t_R$  = 8.4 min; HRMS (ESI):  $m/z$  calcd for  $\text{C}_{17}\text{H}_{24}\text{O}_2$   $[\text{M}+\text{Na}]^+$  283.1669. Found 283.1673;  $[\alpha]_D^{20}$  = 41.3 ( $c$  = 1.1,  $\text{CHCl}_3$ ).

HPLC chart

Racemate

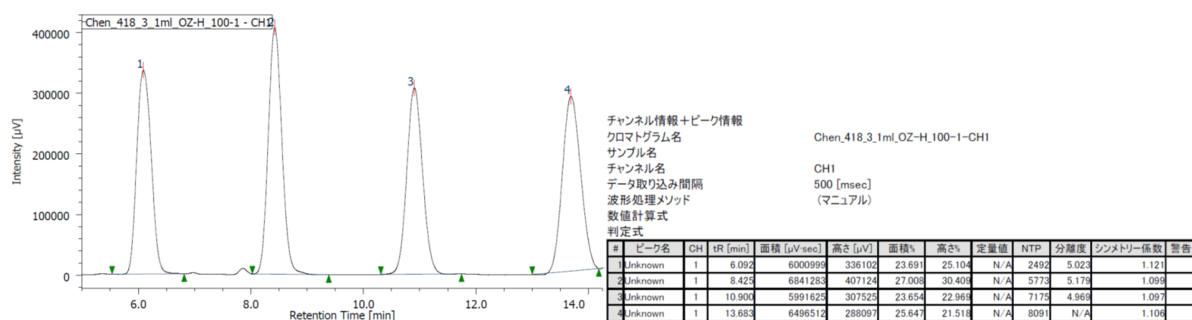

### (2*S*,3*R*)-2i

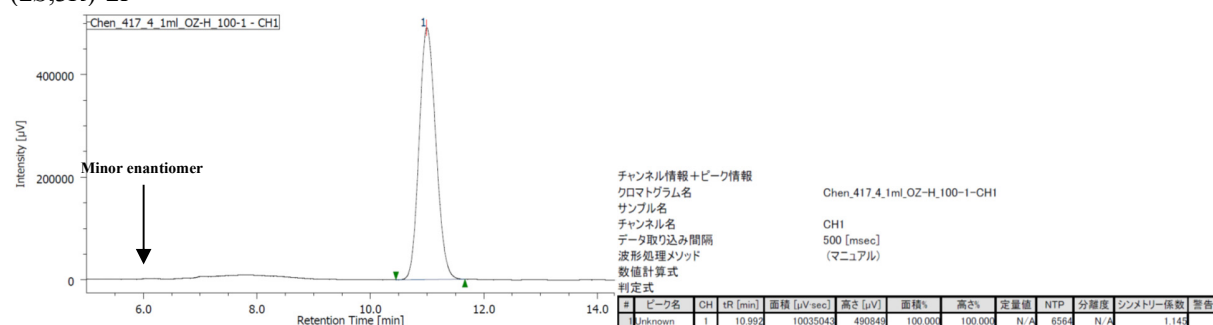

### (2*R*,3*R*)-2i

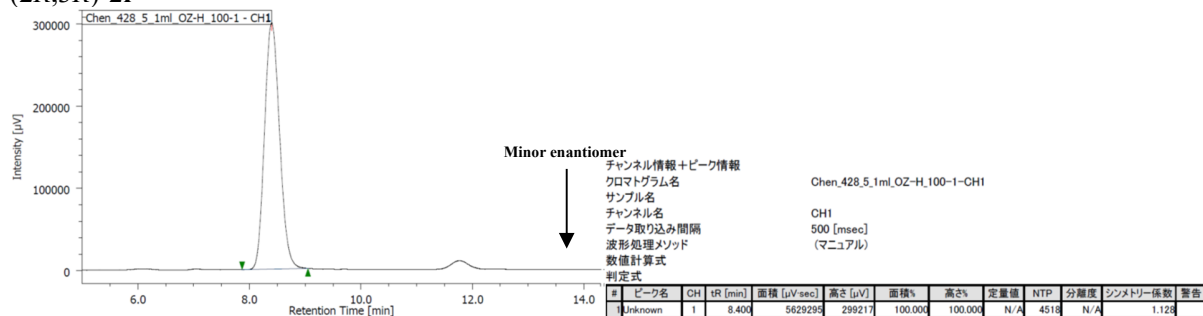

### (2*S*,3*R*)-2-(3-fluorophenyl)-2-methyl-3-vinylheptanoic acid ((2*S*,3*R*)-2j)

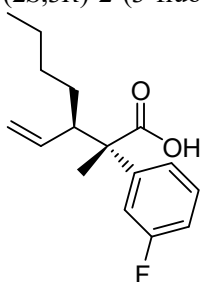

Yield: 92%; <sup>1</sup>H NMR (400 MHz, CDCl<sub>3</sub>): δ = 0.88 (t, *J* = 6.9 Hz, 3H), 1.19-1.50 (m, 6H), 1.53 (s, 3H), 2.83-2.88 (m, 1H), 4.75 (dd, *J* = 18.1, 1.6 Hz, 1H), 4.89 (dd, *J* = 10.0, 1.6 Hz, 1H), 5.30 (ddd, *J* = 18.1, 10.0, 8.0 Hz, 1H), 6.90-6.95 (m, 1H), 7.12-7.16 (m, 1H), 7.20 (d, *J* = 8.2 Hz, 1H), 7.24-7.30 (m, 1H); <sup>13</sup>C NMR (100 MHz, CDCl<sub>3</sub>): δ = 14.0, 16.7, 22.5, 30.2, 30.5, 51.3, 53.7, 113.8 (d, *J* = 21.0 Hz), 114.1 (d, *J* = 23.8 Hz), 118.3, 122.4 (d, *J* = 2.9 Hz), 129.4 (d, *J* = 8.6 Hz), 136.6, 144.3 (d, *J* = 7.6 Hz), 162.7 (d, *J* = 248 Hz), 181.4; <sup>19</sup>F NMR (369 MHz, CDCl<sub>3</sub>): δ = -41.90; IR (neat): 2932, 1700, 1590, 1269, 920, 726 cm<sup>-1</sup>; HPLC (chiral column: CHIRALPAK IG; solvent: hexane/2-propanol = 100/1; flow rate: 1.0 mL/min; detection: at 210 nm; rt): t<sub>R</sub> = 12.6 min; HRMS (ESI): m/z calcd for C<sub>16</sub>H<sub>21</sub>FO<sub>2</sub> [M+Na]<sup>+</sup> 287.1418. Found 287.1434; [α]<sub>D</sub><sup>20</sup> = 72.9 (*c* = 0.93, CHCl<sub>3</sub>).



(2*R*,3*R*)-2-(3-fluorophenyl)-2-methyl-3-vinylheptanoic acid ((2*R*,3*R*)-**2j**)

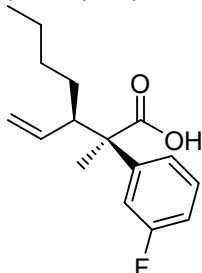

Yield: 90%; <sup>1</sup>H NMR (400 MHz, CDCl<sub>3</sub>): δ = 0.78 (t, *J* = 6.9 Hz, 3H), 1.06-1.25 (m, 6H), 1.51 (s, 3H), 2.85-2.91 (m, 1H), 5.13-5.18 (m, 2H), 5.56 (ddd, *J* = 17.4, 8.7, 8.7 Hz, 1H), 6.94-6.98 (m, 1H), 7.18-7.32 (m, 3H); <sup>13</sup>C NMR (100 MHz, CDCl<sub>3</sub>): δ = 13.9, 17.0, 22.4, 28.2, 29.9, 50.6, 53.9, 114.0 (d, *J* = 21.9 Hz), 114.6 (d, *J* = 23.8 Hz), 118.8, 123.0 (d, *J* = 2.9 Hz), 129.5 (d, *J* = 8.6 Hz), 137.8, 143.5, 162.7 (d, *J* = 24.9 Hz), 180.9; <sup>19</sup>F NMR (369 MHz, CDCl<sub>3</sub>): δ = -41.84; IR (neat): 2933, 1702, 1589, 1269, 921, 724 cm<sup>-1</sup>; HPLC (chiral column: CHIRALPAK IG; solvent: hexane/2-propanol = 100/1; flow rate: 1.0 mL/min; detection: at 210 nm; rt): t<sub>R</sub> = 18.2 min; HRMS (ESI): m/z calcd for C<sub>16</sub>H<sub>21</sub>FO<sub>2</sub> [M+Na]<sup>+</sup> 287.1418. Found 287.1428; [α]<sub>D</sub><sup>20</sup> = 50.3 (*c* = 1.2, CHCl<sub>3</sub>).

HPLC chart

Racemate

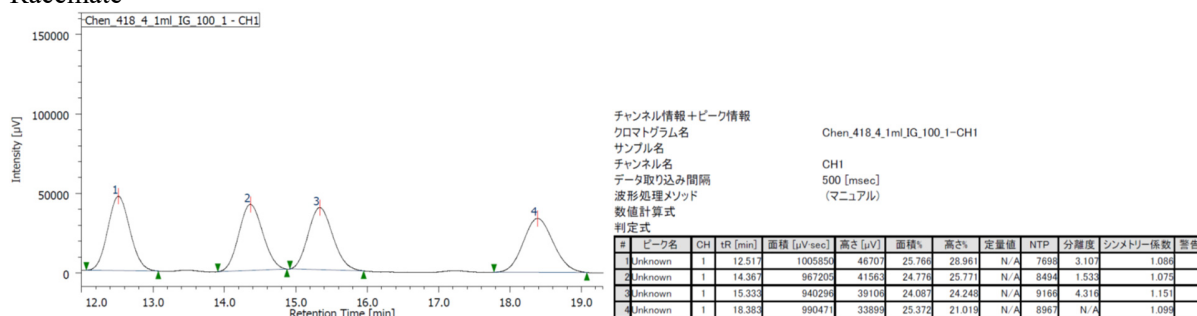

(2*S*,3*R*)-**2j**

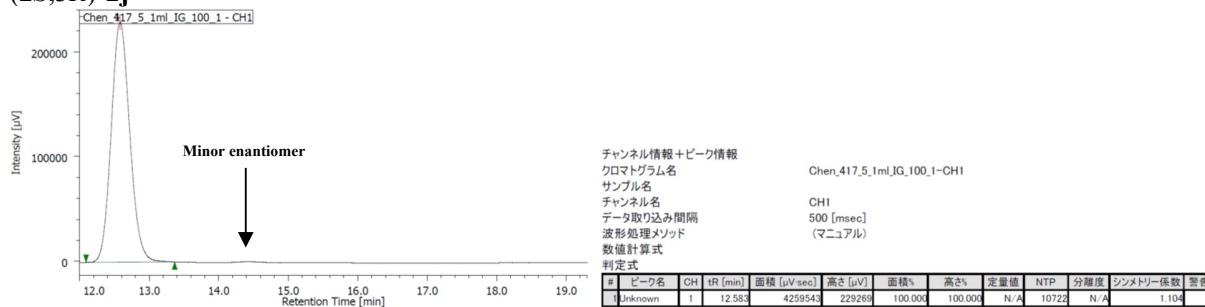

(2*R*,3*R*)-**2j**

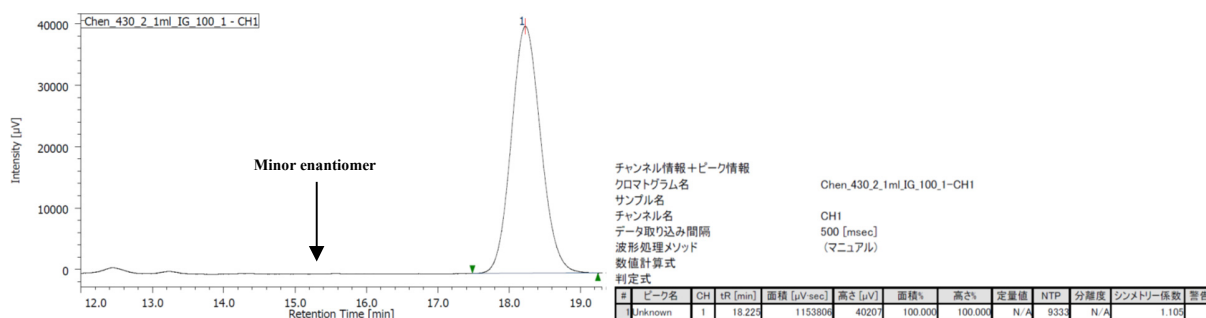

**(2*S*,3*R*)-2-(3-chlorophenyl)-2-methyl-3-vinylheptanoic acid ((2*S*,3*R*)-**2k**)**

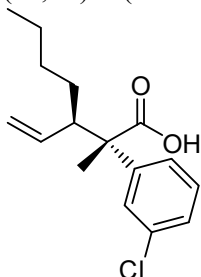

Yield: 86%; <sup>1</sup>H NMR (400 MHz, CDCl<sub>3</sub>): δ = 0.88 (t, *J* = 6.9 Hz, 3H), 1.20-1.42 (m, 6H), 1.53 (s, 3H), 2.83-2.87 (m, 1H), 4.75 (dd, *J* = 18.5, 1.6 Hz, 1H), 4.90 (dd, *J* = 10.5, 1.6 Hz, 1H), 5.29 (ddd, *J* = 18.5, 10.5, 9.2 Hz, 1H), 7.19-7.24 (m, 2H), 7.28-7.33 (m, 1H), 7.39-7.40 (m, 1H); <sup>13</sup>C NMR (100 MHz, CDCl<sub>3</sub>): δ = 14.0, 16.7, 22.5, 30.2, 30.4, 51.2, 53.7, 118.5, 125.1, 127.1, 127.1, 129.3, 134.1, 136.5, 143.7, 181.4; IR (neat): 2931, 1699, 1467, 1270, 920, 715 cm<sup>-1</sup>; HPLC (chiral column: CHIRALPAK IC-3-IC-3; solvent: hexane/2-propanol = 100/1; flow rate: 1.0 mL/min; detection: at 210 nm; rt): *t*<sub>R</sub> = 17.2 min; HRMS (ESI): *m/z* calcd for C<sub>16</sub>H<sub>21</sub>ClO<sub>2</sub> [M+Na]<sup>+</sup> 303.1122. Found 303.1115; [α]<sub>D</sub><sup>20</sup> = 76.6 (*c* = 0.74, CHCl<sub>3</sub>).

**(2*R*,3*R*)-2-(3-chlorophenyl)-2-methyl-3-vinylheptanoic acid ((2*R*,3*R*)-**2k**)**

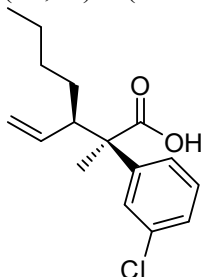

Yield: 91%; <sup>1</sup>H NMR (500 MHz, CDCl<sub>3</sub>): δ = 0.79 (t, *J* = 6.6 Hz, 3H), 1.07-1.26 (m, 6H), 1.52 (s, 3H), 2.87-2.92 (m, 1H), 5.14-5.18 (m, 2H), 5.56 (ddd, *J* = 17.4, 8.4, 8.4 Hz, 1H), 7.24-7.29 (m, 2H), 7.37 (d, *J* = 7.4 Hz, 1H), 7.46 (s, 1H); <sup>13</sup>C NMR (100 MHz, CDCl<sub>3</sub>): δ = 13.9, 17.0, 22.3, 28.2, 29.9, 50.5, 54.0, 118.9, 125.6, 127.2, 127.6, 129.3, 134.2, 137.7, 143.0, 181.1; IR (neat): 2932, 1701, 1468, 1277, 922, 706 cm<sup>-1</sup>; HPLC (chiral column: CHIRALPAK IC-3-IC-3; solvent: hexane/2-propanol = 100/1; flow rate: 1.0 mL/min; detection: at 210 nm; rt): *t*<sub>R</sub> = 15.4 min; HRMS (ESI): *m/z* calcd for C<sub>16</sub>H<sub>21</sub>ClO<sub>2</sub> [M+Na]<sup>+</sup> 303.1122. Found 303.1115; [α]<sub>D</sub><sup>20</sup> = 49.2 (*c* = 1.4, CHCl<sub>3</sub>).

HPLC chart

Racemate

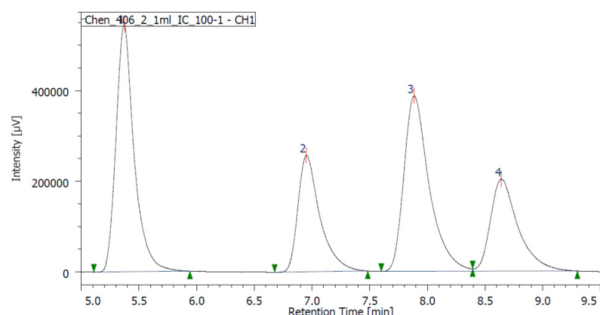

チャンネル情報+ピーク情報  
 クロマトグラム名 Chen\_406\_2\_1ml\_IC\_100-1-CH1  
 サンプル名  
 チャンネル名 CH1  
 データ取り込み間隔 500 [msec]  
 波形処理メソッド (マニュアル)  
 数値計算式  
 判定式

| # | ピーク名    | CH | tR [min] | 面積 [μV·sec] | 高さ [μV] | 面積%    | 高さ%    | 定量値 | NTP  | 分離度   | シンメトリー係数 | 警告 |
|---|---------|----|----------|-------------|---------|--------|--------|-----|------|-------|----------|----|
| 1 | Unknown | 1  | 5.375    | 5934067     | 544867  | 31.886 | 39.143 | N/A | 6465 | 5.347 | 1.308    |    |
| 2 | Unknown | 1  | 6.950    | 3388040     | 258906  | 18.205 | 18.456 | N/A | 7392 | 2.662 | 1.617    |    |
| 3 | Unknown | 1  | 7.883    | 5908525     | 387150  | 31.748 | 27.813 | N/A | 6892 | 1.924 | 1.506    |    |
| 4 | Unknown | 1  | 8.642    | 3378657     | 203052  | 18.166 | 14.587 | N/A | 7096 | N/A   | 1.527    |    |

### (2S,3R)-2k

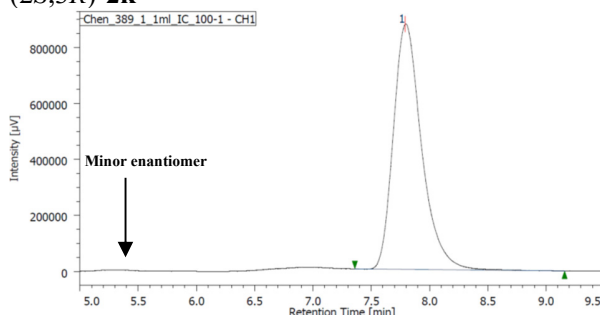

チャンネル情報+ピーク情報  
 クロマトグラム名 Chen\_389\_1\_1ml\_IC\_100-1-CH1  
 サンプル名  
 チャンネル名 CH1  
 データ取り込み間隔 500 [msec]  
 波形処理メソッド (マニュアル)  
 数値計算式  
 判定式

| # | ピーク名    | CH | tR [min] | 面積 [μV·sec] | 高さ [μV] | 面積%     | 高さ%     | 定量値 | NTP  | 分離度 | シンメトリー係数 | 警告 |
|---|---------|----|----------|-------------|---------|---------|---------|-----|------|-----|----------|----|
| 1 | Unknown | 1  | 7.792    | 14770630    | 876161  | 100.000 | 100.000 | N/A | 5304 | N/A | 1.352    |    |

### (2R,3R)-2k

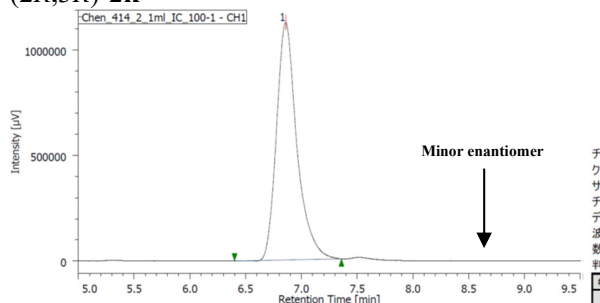

チャンネル情報+ピーク情報  
 クロマトグラム名 Chen\_414\_2\_1ml\_IC\_100-1-CH1  
 サンプル名  
 チャンネル名 CH1  
 データ取り込み間隔 500 [msec]  
 波形処理メソッド (マニュアル)  
 数値計算式  
 判定式

| # | ピーク名    | CH | tR [min] | 面積 [μV·sec] | 高さ [μV] | 面積%     | 高さ%     | 定量値 | NTP  | 分離度 | シンメトリー係数 | 警告 |
|---|---------|----|----------|-------------|---------|---------|---------|-----|------|-----|----------|----|
| 1 | Unknown | 1  | 6.858    | 14301574    | 1126729 | 100.000 | 100.000 | N/A | 7611 | N/A | 1.326    |    |

### (2S,3R)-2-methyl-2-(naphthalen-2-yl)-3-vinylheptanoic acid ((2S,3R)-2l)

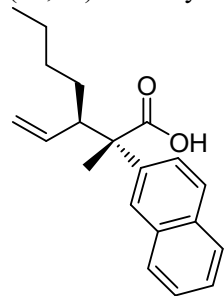

Yield: 62%; <sup>1</sup>H NMR (400 MHz, CDCl<sub>3</sub>): δ = 0.87 (t, *J* = 6.6 Hz, 3H), 1.21-1.52 (m, 6H), 1.64 (s, 3H), 3.00-3.04 (m, 1H), 4.75 (dd, *J* = 17.4, 1.6 Hz, 1H), 4.81 (dd, *J* = 10.1, 1.6 Hz, 1H), 5.32 (ddd, *J* = 17.4, 10.1, 10.1 Hz, 1H), 7.42-7.44 (m, 2H), 7.60 (dd, *J* = 9.2, 1.8 Hz, 1H), 7.75-7.81 (m, 4H); <sup>13</sup>C NMR (100 MHz, CDCl<sub>3</sub>): δ = 14.1, 17.1, 22.6, 30.4, 30.5, 50.9, 53.8, 118.0, 125.1, 125.5, 125.9, 127.3, 127.7, 128.2, 132.3, 133.1, 136.9, 139.1, 181.1; IR (neat): 2930, 2858, 1697, 1457, 1272, 918, 746 cm<sup>-1</sup>; HPLC (chiral column: CHIRALPAK IB N-5; solvent: hexane/2-propanol = 100/1; flow rate: 1.0 mL/min; detection: at 210 nm; rt): t<sub>R</sub> = 27.8 min; HRMS (ESI): m/z calcd for C<sub>20</sub>H<sub>24</sub>O<sub>2</sub> [M+Na]<sup>+</sup> 319.1669. Found 319.1664; [α]<sub>D</sub><sup>20</sup> = 34.1 (*c* = 0.74, CHCl<sub>3</sub>).

### (2R,3R)-2-methyl-2-(naphthalen-2-yl)-3-vinylheptanoic acid ((2R,3R)-2l)

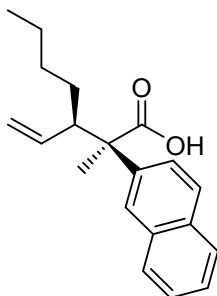

Yield: 77%;  $^1\text{H}$  NMR (500 MHz,  $\text{CDCl}_3$ ):  $\delta$  = 0.75 (t,  $J$  = 6.9 Hz, 3H), 1.07-1.25 (m, 6H), 1.65 (s, 3H), 3.05-3.09 (m, 1H), 5.14-5.21 (m, 2H), 5.63 (ddd,  $J$  = 17.2, 8.4, 8.4 Hz, 1H), 7.46-7.49 (m, 2H), 7.66 (dd,  $J$  = 8.6, 2.3 Hz, 1H), 7.79-7.85 (m, 4H);  $^{13}\text{C}$  NMR (100 MHz,  $\text{CDCl}_3$ ):  $\delta$  = 14.0, 17.2, 22.4, 28.3, 30.0, 50.2, 54.1, 118.6, 125.4, 126.0, 126.3, 127.3, 127.6, 128.2, 132.3, 133.1, 138.1, 138.4, 181.6; IR (neat): 2931, 2858, 1698, 1465, 1275, 920, 746  $\text{cm}^{-1}$ ; HPLC (chiral column: CHIRALPAK IB N-5; solvent: hexane/2-propanol = 100/1; flow rate: 1.0 mL/min; detection: at 210 nm; rt):  $t_R$  = 19.9 min; HRMS (ESI):  $m/z$  calcd for  $\text{C}_{20}\text{H}_{24}\text{O}_2$   $[\text{M}+\text{Na}]^+$  319.1669. Found 319.1676;  $[\alpha]_D^{20}$  = 33.7 ( $c$  = 0.82,  $\text{CHCl}_3$ ).

## HPLC chart

### Racemate

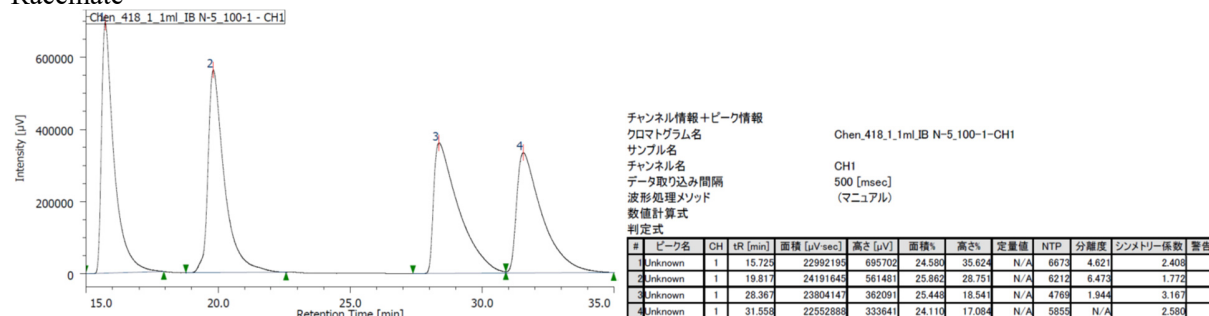

### (2S,3R)-21

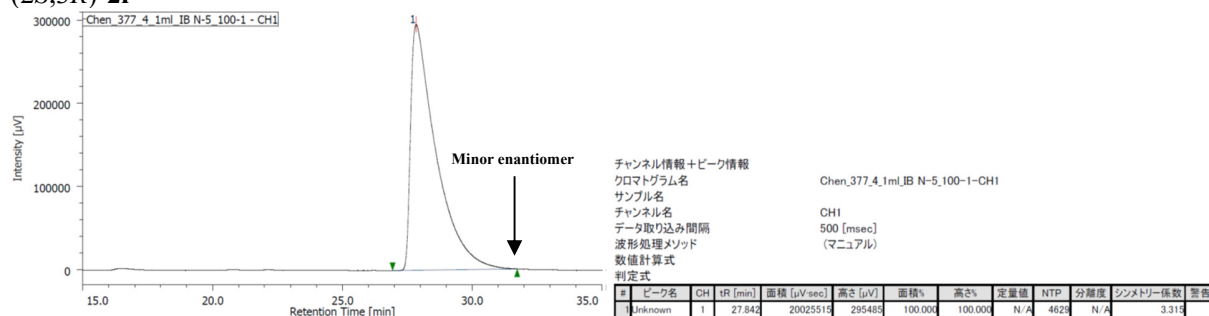

### (2R,3R)-21

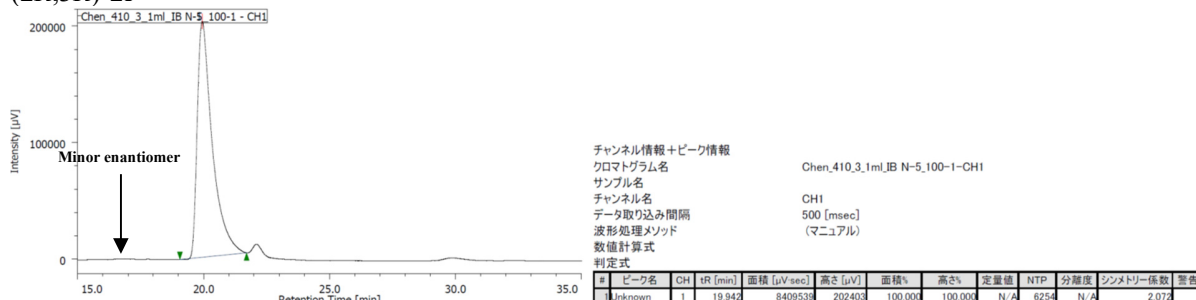

(2*S*,3*R*)-2-methyl-2-(thiophen-3-yl)-3-vinylheptanoic acid ((2*S*,3*R*)-**2m**)

Yield: 97%; <sup>1</sup>H NMR (500 MHz, CDCl<sub>3</sub>): δ = 0.87 (t, *J* = 6.6 Hz, 3H), 1.18-1.38 (m, 6H), 1.53 (s, 3H), 2.84-2.88 (m, 1H), 4.80 (dd, *J* = 17.7, 1.4 Hz, 1H), 4.93 (dd, *J* = 9.7, 1.4 Hz, 1H), 5.36 (ddd, *J* = 17.7, 9.7, 7.9 Hz, 1H), 7.11-7.12 (m, 1H), 7.18-7.19 (m, 1H), 7.23-7.25 (m, 1H); <sup>13</sup>C NMR (100 MHz, CDCl<sub>3</sub>): δ = 14.0, 17.1, 22.5, 30.1, 30.2, 51.3, 52.1, 118.0, 121.6, 124.9, 127.3, 137.0, 142.9, 181.2; IR (neat): 2930, 1699, 1465, 1273, 917, 714 cm<sup>-1</sup>; HPLC (chiral column: CHIRALCEL OZ-H; solvent: hexane/2-propanol = 100/1; flow rate: 1.0 mL/min; detection: at 210 nm; rt): *t<sub>R</sub>* = 29.1 min; HRMS (ESI): *m/z* calcd for C<sub>14</sub>H<sub>20</sub>O<sub>2</sub>S [M+Na]<sup>+</sup> 275.1076. Found 275.1082; [α]<sub>D</sub><sup>20</sup> = 46.4 (*c* = 0.87, CHCl<sub>3</sub>).

(2*R*,3*R*)-2-methyl-2-(thiophen-3-yl)-3-vinylheptanoic acid ((2*R*,3*R*)-**2m**)

Yield: 82%; <sup>1</sup>H NMR (400 MHz, CDCl<sub>3</sub>): δ = 0.78 (t, *J* = 6.9 Hz, 3H), 1.03-1.25 (m, 6H), 1.51 (s, 3H), 2.81-2.86 (m, 1H), 5.11-5.16 (m, 2H), 5.54 (ddd, *J* = 16.9, 8.7, 8.7 Hz, 1H), 7.15-7.16 (m, 1H), 7.21-7.22 (m, 1H), 7.26-7.28 (m, 1H); <sup>13</sup>C NMR (100 MHz, CDCl<sub>3</sub>): δ = 14.0, 17.2, 22.4, 28.2, 29.9, 51.2, 52.4, 118.6, 122.1, 125.0, 127.5, 137.8, 142.4, 181.0; IR (neat): 2931, 1701, 1278, 1091, 921, 773 cm<sup>-1</sup>; HPLC (chiral column: CHIRALCEL OZ-H; solvent: hexane/2-propanol = 100/1; flow rate: 1.0 mL/min; detection: at 210 nm; rt): *t<sub>R</sub>* = 10.7 min; HRMS (ESI): *m/z* calcd for C<sub>14</sub>H<sub>20</sub>O<sub>2</sub>S [M+Na]<sup>+</sup> 275.1076. Found 275.1084; [α]<sub>D</sub><sup>20</sup> = 51.9 (*c* = 1.2, CHCl<sub>3</sub>).

HPLC chart

Racemate

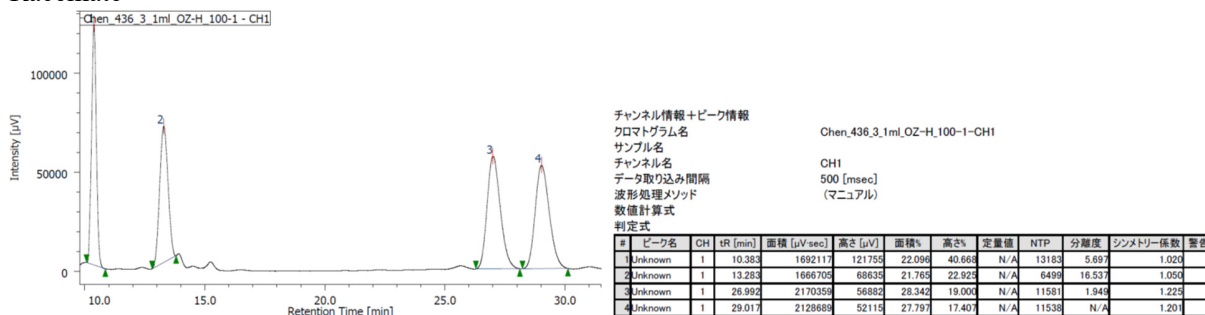

(2*S*,3*R*)-**2m**

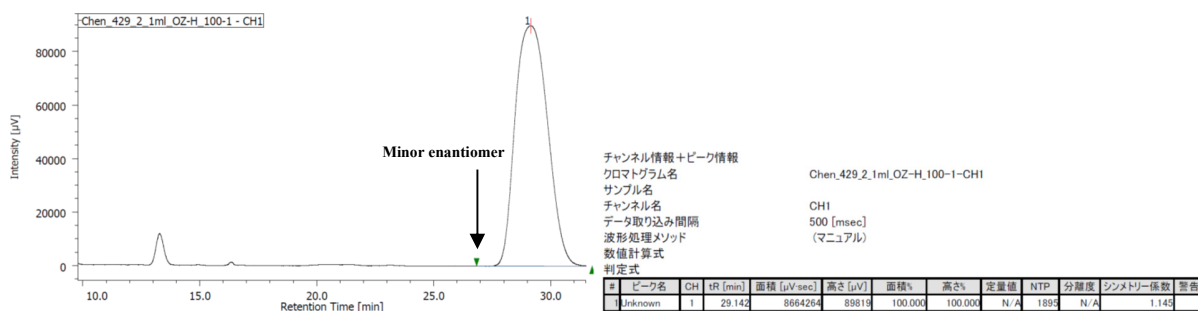

**(2*R*,3*R*)-2m**

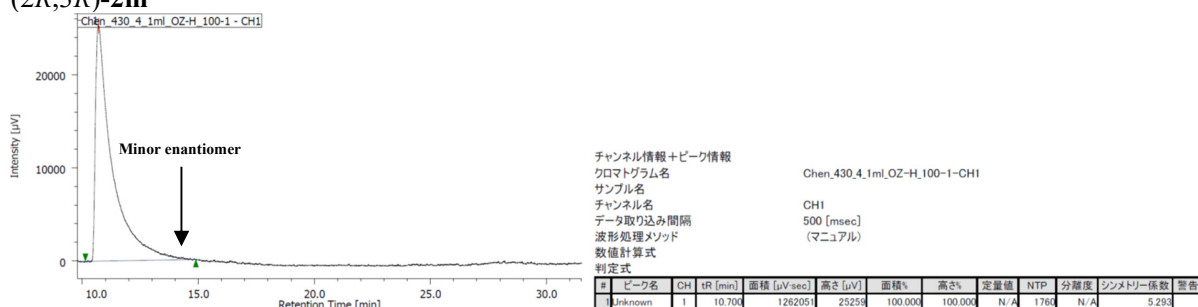

**(2*S*,3*R*)-2-(4-(hex-5-enoyloxy)phenyl)-2-methyl-3-vinylheptanoic acid ((2*S*,3*R*)-2n)**

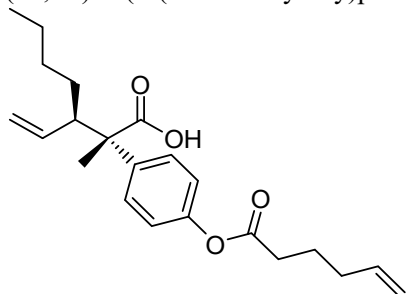

Yield: 84%;  $^1\text{H}$  NMR (500 MHz,  $\text{CDCl}_3$ ):  $\delta$  = 0.87 (t,  $J$  = 6.6 Hz, 3H), 1.22-1.43 (m, 6H), 1.53 (s, 3H), 1.85 (tt,  $J$  = 7.3, 7.3 Hz, 2H), 2.18 (dt,  $J$  = 7.3, 7.3 Hz, 2H), 2.55 (t,  $J$  = 7.3 Hz, 2H), 2.85-2.88 (m, 1H), 4.75 (dd,  $J$  = 17.2, 1.4 Hz, 1H), 4.89 (dd,  $J$  = 10.3, 1.4 Hz, 1H), 5.03 (dd,  $J$  = 9.2, 1.4 Hz, 1H), 5.07 (dd,  $J$  = 17.2, 1.4 Hz, 1H), 5.30 (ddd,  $J$  = 17.2, 9.2, 6.9 Hz, 1H), 5.78-5.86 (m, 1H), 7.02 (d,  $J$  = 8.9 Hz, 2H), 7.42 (d,  $J$  = 8.9 Hz, 2H);  $^{13}\text{C}$  NMR (125 MHz,  $\text{CDCl}_3$ ):  $\delta$  = 14.0, 16.9, 22.5, 24.0, 30.3, 30.4, 33.0, 33.6, 51.3, 53.4, 115.6, 118.2, 121.0, 127.9, 136.8, 137.5, 139.0, 149.5, 171.9, 181.4; IR (neat): 2932, 1698, 1508, 1173, 1017, 917  $\text{cm}^{-1}$ ; Enantiomeric excess was determined after hydrolysis of phenyl ester (2*S*,3*R*)-2n. HPLC (chiral column: CHIRALPAK IB N-5-IB N-5; solvent: hexane/2-propanol = 10/1; flow rate: 1.0 mL/min; detection: at 210 nm; rt):  $t_R$  = 23.5 min. HRMS (ESI):  $m/z$  calcd for  $\text{C}_{22}\text{H}_{30}\text{O}_4$   $[\text{M}+\text{Na}]^+$  381.2036. Found 381.2038;  $[\alpha]_D^{20}$  = 53.7 ( $c$  = 1.1,  $\text{CHCl}_3$ ).

**(2*R*,3*R*)-2-(4-(hex-5-enoyloxy)phenyl)-2-methyl-3-vinylheptanoic acid ((2*R*,3*R*)-2n)**

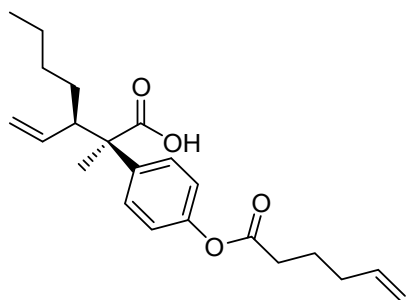

Yield: 84%;  $^1\text{H}$  NMR (400 MHz,  $\text{CDCl}_3$ ):  $\delta$  = 0.78 (t,  $J$  = 6.9 Hz, 3H), 1.04-1.23 (m, 6H), 1.52 (s, 3H), 1.86 (tt,  $J$  = 7.4, 7.4 Hz, 2H), 2.18 (dt,  $J$  = 7.4, 7.4 Hz, 2H), 2.57 (t,  $J$  = 7.4 Hz, 2H), 2.88-2.92 (m, 1H), 5.02-5.10 (m, 2H), 5.12-5.17 (m, 2H), 5.52-5.61 (m, 1H), 5.77-5.87 (m, 1H), 7.05 (d,  $J$  = 8.9 Hz, 2H), 7.47 (d,  $J$  = 8.9 Hz, 2H);  $^{13}\text{C}$  NMR (100 MHz,  $\text{CDCl}_3$ ):  $\delta$  = 14.0, 17.2, 22.4, 24.0, 28.2, 30.0, 33.0, 33.6, 50.5, 53.6, 115.6, 118.7, 121.0, 128.4, 137.5, 137.9, 138.2, 149.6, 172.0, 181.0; IR (neat): 2933, 1699, 1508, 1173, 1017, 918  $\text{cm}^{-1}$ ; Enantiomeric excess was determined after hydrolysis of phenyl ester (*2R,3R*)-**2n**. HPLC (chiral column: CHIRALPAK IB N-5-IB N-5; solvent: hexane/2-propanol = 10/1; flow rate: 1.0 mL/min; detection: at 210 nm; rt):  $t_R$  = 18.3 min. HRMS (ESI):  $m/z$  calcd for  $\text{C}_{22}\text{H}_{30}\text{O}_4$   $[\text{M}+\text{Na}]^+$  381.2036. Found 381.2039;  $[\alpha]_D^{20}$  = 42.6 ( $c$  = 1.2,  $\text{CHCl}_3$ ).

## HPLC chart

### Racemate

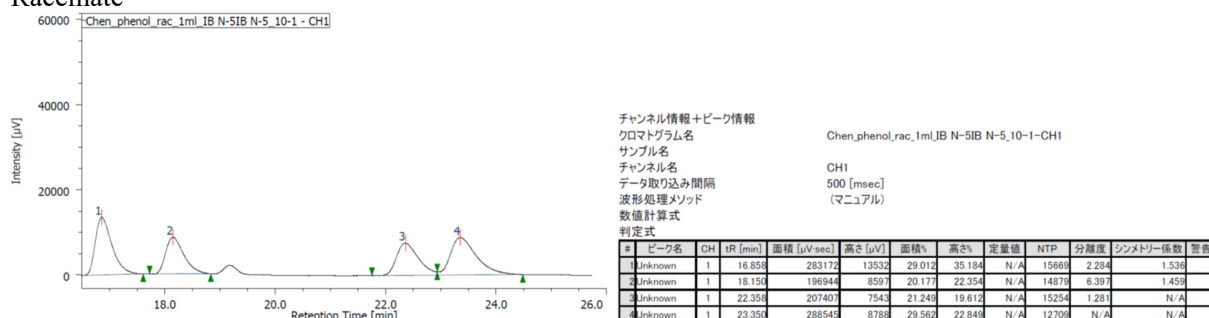

### (2*S*,3*R*)-**2n**

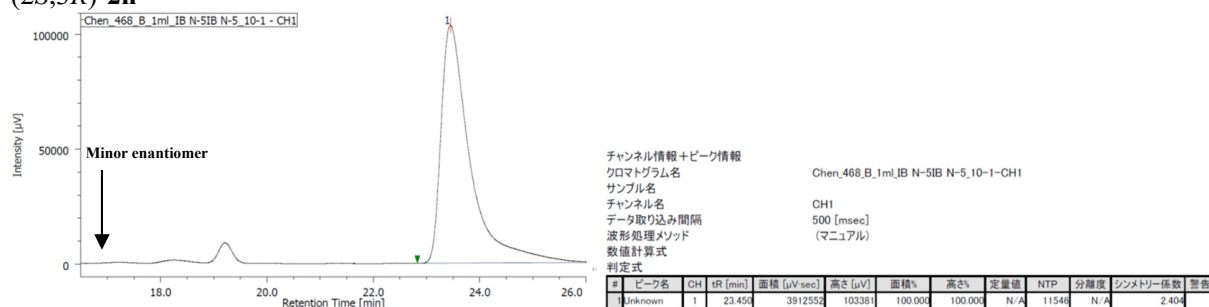

### (2*R*,3*R*)-**2n**

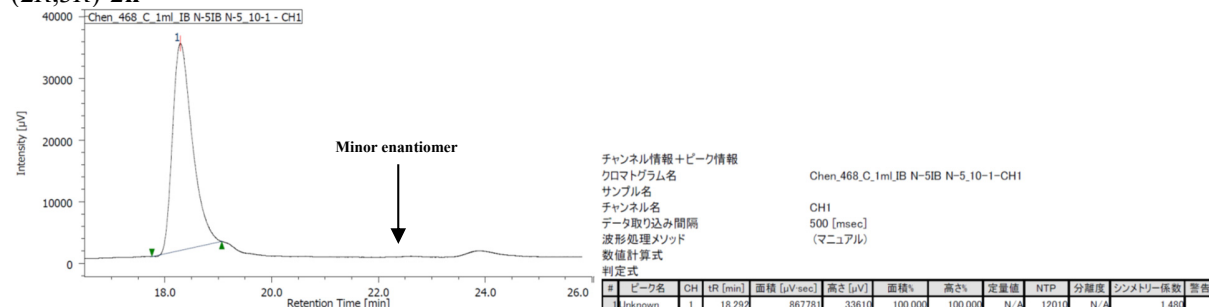

(2*S*,3*R*)-2-(4-((4-(diethylamino)-4-oxobutanoyl)oxy)phenyl)-2-methyl-3-vinylheptanoic acid ((2*S*,3*R*)-**2o**)

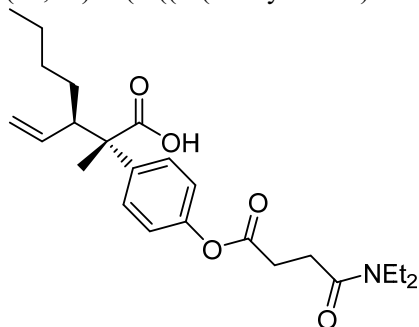

Yield: 89%;  $^1\text{H}$  NMR (500 MHz,  $\text{CDCl}_3$ ):  $\delta$  = 0.86 (t,  $J$  = 6.9 Hz, 3H), 1.10 (t,  $J$  = 7.0 Hz, 3H), 1.20 (t,  $J$  = 7.0 Hz, 3H), 1.24-1.44 (m, 6H), 1.51 (s, 3H), 2.70 (t,  $J$  = 6.7 Hz, 2H), 2.84-2.88 (m, 1H), 2.90 (t,  $J$  = 6.7 Hz, 2H), 3.32-3.41 (m, 4H), 4.74 (d,  $J$  = 18.1 Hz, 1H), 4.87 (d,  $J$  = 10.9 Hz, 1H), 5.30 (ddd,  $J$  = 18.1, 10.9, 10.9 Hz, 1H), 7.01 (d,  $J$  = 8.6 Hz, 2H), 7.40 (d,  $J$  = 8.6 Hz, 2H);  $^{13}\text{C}$  NMR (125 MHz,  $\text{CDCl}_3$ ):  $\delta$  = 13.0, 14.0, 14.1, 17.1, 22.5, 27.8, 29.6, 30.3, 30.4, 40.5, 41.9, 51.3, 53.3, 118.0, 121.0, 127.8, 137.0, 139.2, 149.5, 170.3, 171.8, 180.2; IR (neat): 2934, 1715, 1615, 1456, 1210, 1138, 917, 737  $\text{cm}^{-1}$ ; Enantiomeric excess was determined after hydrolysis of phenyl ester (2*S*,3*R*)-**2o**. HPLC (chiral column: CHIRALPAK IB N-5-IB N-5; solvent: hexane/2-propanol = 10/1; flow rate: 1.0 mL/min; detection: at 210 nm; rt):  $t_R$  = 23.8 min. HRMS (ESI):  $m/z$  calcd for  $\text{C}_{24}\text{H}_{35}\text{NO}_5$   $[\text{M}+\text{Na}]^+$  440.2407. Found 440.2428;  $[\alpha]_D^{20}$  = 39.7 ( $c$  = 1.8,  $\text{CHCl}_3$ ).

(2*R*,3*R*)-2-(4-((4-(diethylamino)-4-oxobutanoyl)oxy)phenyl)-2-methyl-3-vinylheptanoic acid ((2*R*,3*R*)-**2o**)

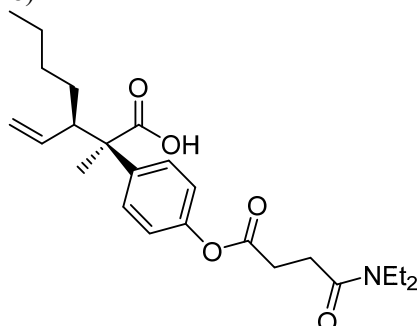

Yield: 85%;  $^1\text{H}$  NMR (400 MHz,  $\text{CDCl}_3$ ):  $\delta$  = 0.77 (t,  $J$  = 6.9 Hz, 3H), 1.00-1.27 (m, 12H), 1.51 (s, 3H), 2.71 (t,  $J$  = 6.9 Hz, 2H), 2.88-2.92 (m, 3H), 3.31-3.41 (m, 4H), 5.10-5.16 (m, 2H), 5.56 (ddd,  $J$  = 19.2, 10.1, 10.1 Hz, 1H), 7.05 (d,  $J$  = 9.2 Hz, 2H), 7.45 (d,  $J$  = 9.2 Hz, 2H);  $^{13}\text{C}$  NMR (100 MHz,  $\text{CDCl}_3$ ):  $\delta$  = 13.0, 14.0, 14.1, 17.3, 22.4, 27.9, 28.2, 29.6, 30.0, 40.4, 41.9, 50.4, 53.5, 118.5, 121.0, 128.3, 138.1, 138.3, 149.6, 170.2, 171.8, 180.1; IR (neat): 2933, 1731, 1614, 1457, 1211, 1136, 919, 737  $\text{cm}^{-1}$ ; Enantiomeric excess was determined after hydrolysis of phenyl ester (2*R*,3*R*)-**2o**. HPLC (chiral column: CHIRALPAK IB N-5-IB N-5; solvent: hexane/2-propanol = 10/1; flow rate: 1.0 mL/min; detection: at 210 nm; rt):  $t_R$  = 18.5 min. HRMS (ESI):  $m/z$  calcd for  $\text{C}_{24}\text{H}_{35}\text{NO}_5$   $[\text{M}+\text{Na}]^+$  440.2407. Found 440.2426;  $[\alpha]_D^{20}$  = 36.1 ( $c$  = 1.1,  $\text{CHCl}_3$ ).

HPLC chart  
Racemate



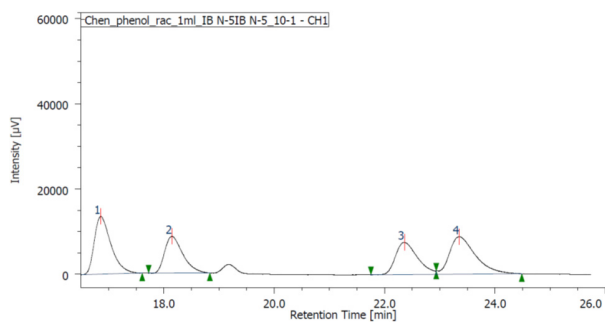

チャンネル情報+ピーク情報

クロマトグラム名  
サンプル名  
チャンネル名  
データ取り込み間隔  
波形処理メソッド  
数値計算式  
判定式

Chen\_phenol\_rac\_1ml\_IB N-5IB N-5\_10-1-CH1  
CH1  
500 [msec]  
(マニュアル)

| # | ピーク名    | CH | tR [min] | 面積 [μV·sec] | 高さ [μV] | 面積%    | 高さ%    | 定量値 | NTP   | 分離度   | シメトリ係数 | 警告 |
|---|---------|----|----------|-------------|---------|--------|--------|-----|-------|-------|--------|----|
| 1 | Unknown | 1  | 16.856   | 283172      | 13532   | 29.012 | 35.184 | N/A | 15669 | 2.284 | 1.536  |    |
| 2 | Unknown | 1  | 18.150   | 196944      | 8597    | 20.177 | 22.354 | N/A | 14879 | 6.397 | 1.459  |    |
| 3 | Unknown | 1  | 22.356   | 207407      | 7543    | 21.249 | 19.612 | N/A | 15254 | 1.281 | N/A    |    |
| 4 | Unknown | 1  | 23.350   | 288545      | 8788    | 29.562 | 22.849 | N/A | 12709 | N/A   | N/A    |    |

## (2*S*,3*R*)-2o

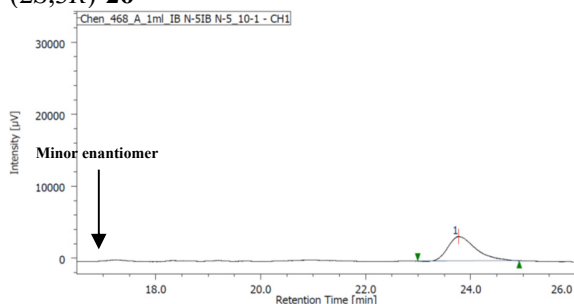

チャンネル情報+ピーク情報

クロマトグラム名  
サンプル名  
チャンネル名  
データ取り込み間隔  
波形処理メソッド  
数値計算式  
判定式

Chen\_468\_A\_1ml\_IB N-5IB N-5\_10-1-CH1  
CH1  
500 [msec]  
(マニュアル)

| # | ピーク名    | CH | tR [min] | 面積 [μV·sec] | 高さ [μV] | 面積%     | 高さ%     | 定量値 | NTP   | 分離度 | シメトリ係数 | 警告 |
|---|---------|----|----------|-------------|---------|---------|---------|-----|-------|-----|--------|----|
| 1 | Unknown | 1  | 23.767   | 125190      | 3391    | 100.000 | 100.000 | N/A | 10183 | N/A | 1.562  |    |

## (2*R*,3*R*)-2o

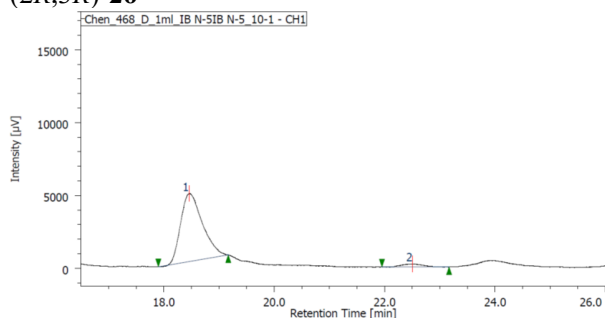

チャンネル情報+ピーク情報

クロマトグラム名  
サンプル名  
チャンネル名  
データ取り込み間隔  
波形処理メソッド  
数値計算式  
判定式

Chen\_468\_D\_1ml\_IB N-5IB N-5\_10-1-CH1  
CH1  
500 [msec]  
(マニュアル)

| # | ピーク名    | CH | tR [min] | 面積 [μV·sec] | 高さ [μV] | 面積%    | 高さ%    | 定量値 | NTP   | 分離度   | シメトリ係数 | 警告 |
|---|---------|----|----------|-------------|---------|--------|--------|-----|-------|-------|--------|----|
| 1 | Unknown | 1  | 18.458   | 128231      | 4869    | 95.729 | 95.709 | N/A | 10380 | 5.447 | 1.408  |    |
| 2 | Unknown | 1  | 22.508   | 5721        | 209     | 4.271  | 4.291  | N/A | 13805 | N/A   | 1.000  |    |

## (2*S*,3*R*)-2-ethyl-2-phenyl-3-vinylheptanoic acid ((2*S*,3*R*)-2p)

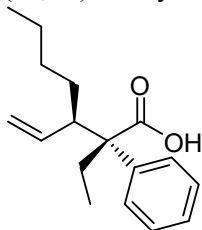

Yield: 70%;  $^1\text{H}$  NMR (400 MHz,  $\text{CDCl}_3$ ):  $\delta$  = 0.70 (t,  $J$  = 7.6 Hz, 3H), 0.80 (t,  $J$  = 7.1 Hz, 3H), 1.01-1.30 (m, 5H), 1.46-1.52 (m, 1H), 1.93-2.12 (m, 2H), 2.62-2.68 (m, 1H), 5.07-5.16 (m, 2H), 5.55 (ddd,  $J$  = 17.4, 10.1, 10.1 Hz, 1H), 7.24-7.26 (m, 3H), 7.30-7.34 (m, 2H);  $^{13}\text{C}$  NMR (100 MHz,  $\text{CDCl}_3$ ):  $\delta$  = 9.1, 14.1, 22.5, 29.2, 30.2, 30.4, 50.5, 59.2, 117.8, 126.5, 127.7, 128.4, 138.5, 139.2, 180.8; IR (neat): 2934, 1698, 1461, 1255, 918, 699  $\text{cm}^{-1}$ ; HPLC (chiral column: CHIRALPAK IB N-5; solvent: hexane/2-propanol = 100/1; flow rate: 1.0 mL/min; detection: at 210 nm; rt):  $t_R$  = 8.9 min; HRMS (ESI):  $m/z$  calcd for  $\text{C}_{17}\text{H}_{24}\text{O}_2$   $[\text{M}+\text{Na}]^+$  283.1669. Found 283.1673;  $[\alpha]_D^{20}$  = -1.1 ( $c$  = 1.5,  $\text{CHCl}_3$ ).

## (2*R*,3*R*)-2-ethyl-2-phenyl-3-vinylheptanoic acid ((2*R*,3*R*)-2p)

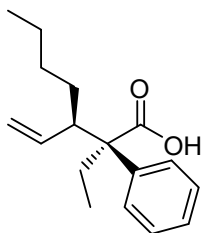

Yield: 77%;  $^1\text{H}$  NMR (500 MHz,  $\text{CDCl}_3$ ):  $\delta$  = 0.83 (t,  $J$  = 7.2 Hz, 3H), 0.89 (t,  $J$  = 7.4 Hz, 3H), 1.13-1.34 (m, 5H), 1.59-1.65 (m, 1H), 2.12-2.16 (m, 2H), 2.65-2.69 (m, 1H), 5.01-5.13 (m, 3H), 7.23-7.26 (m, 3H), 7.30-7.33 (m, 2H);  $^{13}\text{C}$  NMR (100 MHz,  $\text{CDCl}_3$ ):  $\delta$  = 9.0, 14.1, 22.5, 29.6, 30.0, 30.9, 49.6, 58.8, 102.9, 117.7, 126.7, 127.3, 129.1, 138.0, 181.4; IR (neat): 2932, 1699, 1459, 1251, 917, 702  $\text{cm}^{-1}$ ; HPLC (chiral column: CHIRALPAK IB N-5; solvent: hexane/2-propanol = 100/1; flow rate: 1.0 mL/min; detection: at 210 nm; rt):  $t_R$  = 15.1 min; HRMS (ESI):  $m/z$  calcd for  $\text{C}_{17}\text{H}_{24}\text{O}_2$   $[\text{M}+\text{Na}]^+$  283.1669. Found 283.1681;  $[\alpha]_D^{20}$  = 1.5 ( $c$  = 2.0,  $\text{CHCl}_3$ ).

## HPLC chart

### Racemate

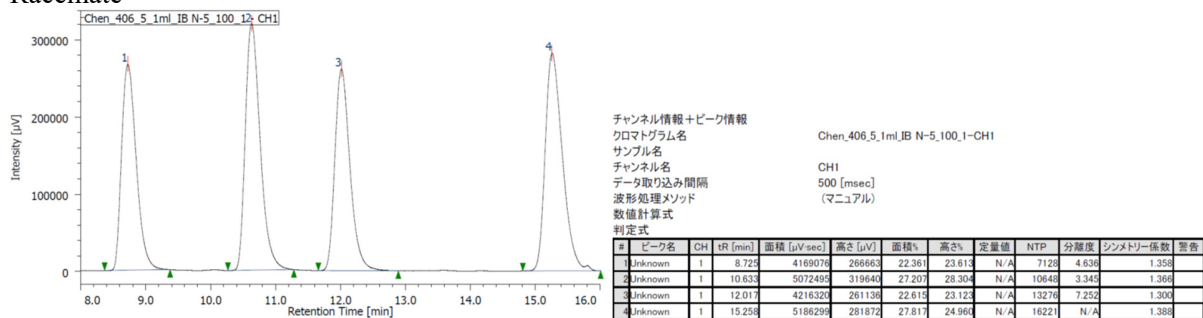

### (2S,3R)-2p

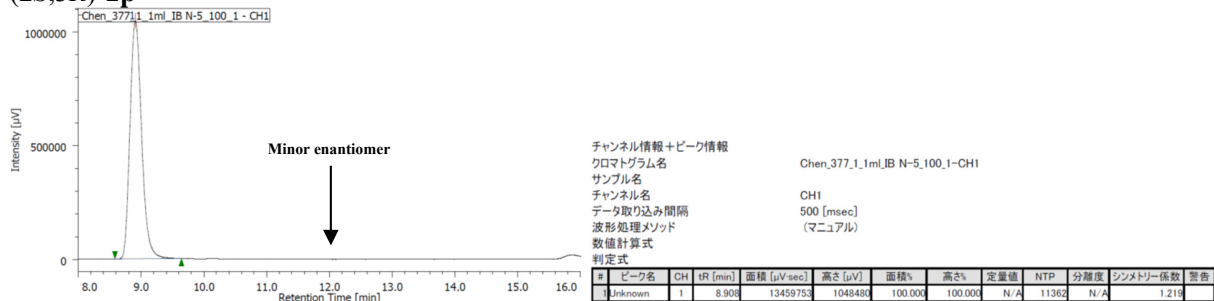

### (2R,3R)-2p

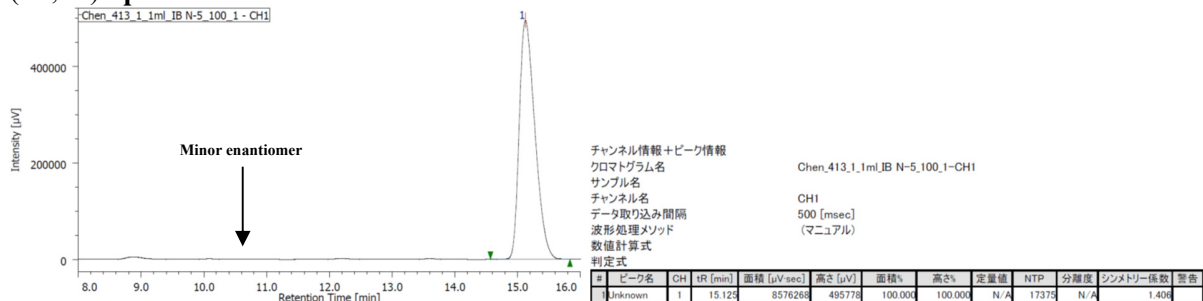

(2S,3R)-2-benzyl-2-phenyl-3-vinylheptanoic acid ((2S,3R)-2q)

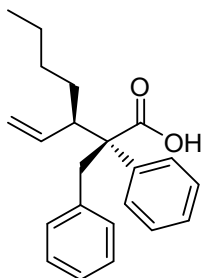

Yield: 72%;  $^1\text{H}$  NMR (400 MHz,  $\text{CDCl}_3$ ):  $\delta$  = 0.85 (t,  $J$  = 7.1 Hz, 3H), 1.10-1.41 (m, 5H), 1.66-1.71 (m, 1H), 2.77-2.81 (m, 1H), 3.08 (d,  $J$  = 14.2 Hz, 1H), 3.45 (d,  $J$  = 14.2 Hz, 1H), 5.25 (dd,  $J$  = 17.2, 1.8 Hz, 1H), 5.34 (dd,  $J$  = 10.3, 1.8 Hz, 1H), 5.72 (ddd,  $J$  = 17.2, 10.3, 10.3 Hz, 1H), 6.71 (d,  $J$  = 7.3 Hz, 2H), 7.03-7.11 (m, 5H), 7.25-7.27 (m, 3H);  $^{13}\text{C}$  NMR (125 MHz,  $\text{CDCl}_3$ ):  $\delta$  = 14.1, 22.6, 29.6, 30.3, 44.1, 49.3, 60.4, 118.7, 126.1, 126.7, 127.4, 127.6, 128.7, 130.8, 137.2, 138.2, 139.1, 180.1; IR (neat): 3031, 2930, 1698, 1496, 1234, 918, 700  $\text{cm}^{-1}$ ; HPLC (chiral column: CHIRALCEL OZ-H; solvent: hexane/2-propanol = 100/1; flow rate: 1.0 mL/min; detection: at 210 nm; rt):  $t_R$  = 14.9 min; HRMS (ESI):  $m/z$  calcd for  $\text{C}_{22}\text{H}_{26}\text{O}_2$   $[\text{M}+\text{Na}]^+$  345.1825. Found 345.1813;  $[\alpha]_D^{20}$  = 5.8 ( $c$  = 2.0,  $\text{CHCl}_3$ ).

**(2R,3R)-2-benzyl-2-phenyl-3-vinylheptanoic acid ((2R,3R)-2q)**

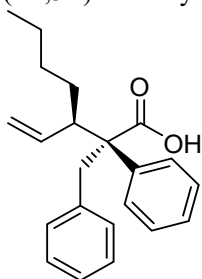

Yield: 69%;  $^1\text{H}$  NMR (500 MHz,  $\text{CDCl}_3$ ):  $\delta$  = 0.90 (t,  $J$  = 6.9 Hz, 3H), 1.20-1.36 (m, 5H), 1.77-1.80 (m, 1H), 2.76-2.80 (m, 1H), 3.40 (d,  $J$  = 13.7 Hz, 1H), 3.47 (d,  $J$  = 13.7 Hz, 1H), 5.14 (dd,  $J$  = 17.1, 1.9 Hz, 1H), 5.21 (dd,  $J$  = 9.3, 1.9 Hz, 1H), 5.43 (ddd,  $J$  = 17.1, 9.3, 8.4 Hz, 1H), 7.04 (d,  $J$  = 6.9 Hz, 2H), 7.15-7.20 (m, 3H), 7.25 (d,  $J$  = 7.4 Hz, 2H), 7.29-7.35 (m, 3H);  $^{13}\text{C}$  NMR (100 MHz,  $\text{CDCl}_3$ ):  $\delta$  = 14.1, 22.6, 29.9, 30.5, 42.8, 48.8, 60.0, 118.5, 126.5, 126.8, 127.2, 127.8, 129.4, 130.4, 137.0, 138.1, 138.6, 180.6; IR (neat): 3031, 2929, 1700, 1497, 1265, 917, 701  $\text{cm}^{-1}$ ; HPLC (chiral column: CHIRALCEL OZ-H; solvent: hexane/2-propanol = 100/1; flow rate: 1.0 mL/min; detection: at 210 nm; rt):  $t_R$  = 7.6 min; HRMS (ESI):  $m/z$  calcd for  $\text{C}_{22}\text{H}_{26}\text{O}_2$   $[\text{M}+\text{Na}]^+$  345.1825. Found 345.1813;  $[\alpha]_D^{20}$  = 10.6 ( $c$  = 3.8,  $\text{CHCl}_3$ ).

**HPLC chart**

**Racemate**

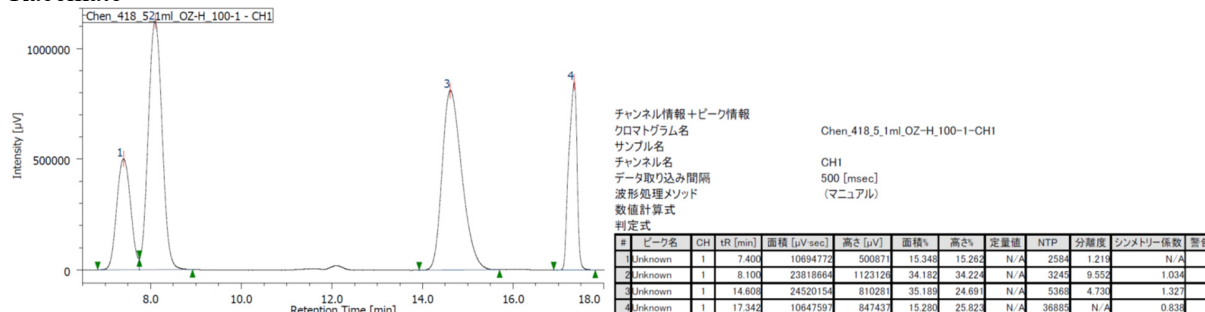

**(2S,3R)-2q**

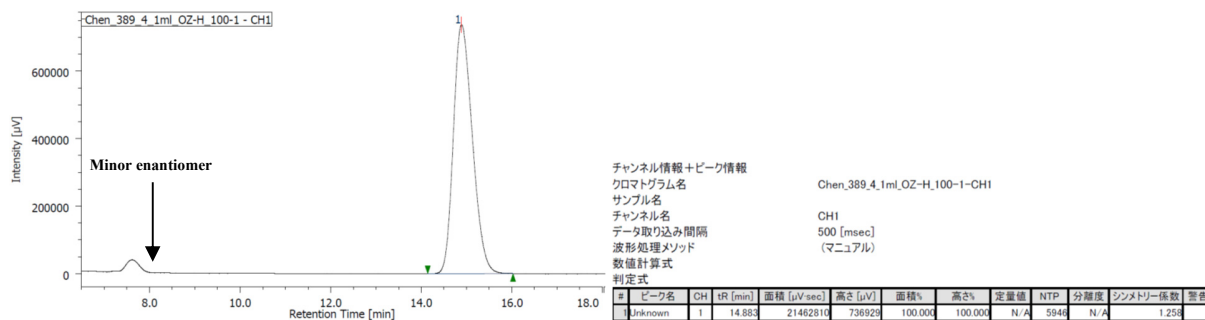

### (2R,3R)-2q

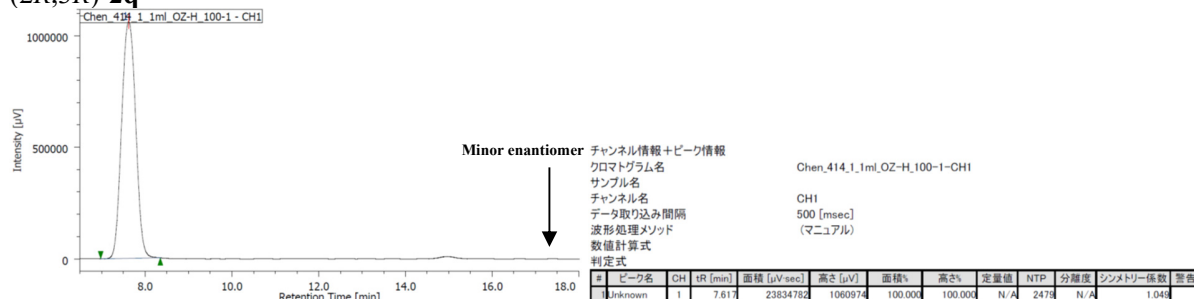

### (2S,3R)-3-ethyl-2-methyl-2-phenylpent-4-enoic acid ((2S,3R)-2r [(2S,3R)-2Et])

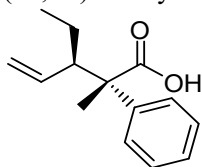

Yield: 89%;  $^1\text{H}$  NMR (400 MHz,  $\text{CDCl}_3$ ):  $\delta$  = 0.90 (t,  $J$  = 7.3 Hz, 3H), 1.26-1.39 (m, 2H), 1.54 (s, 3H), 2.77-2.82 (m, 1H), 4.77 (dd,  $J$  = 18.5, 1.8 Hz, 1H), 4.90 (dd,  $J$  = 10.3, 1.8 Hz, 1H), 5.30 (ddd,  $J$  = 18.5, 10.3, 9.2 Hz, 1H), 7.21-7.25 (m, 1H), 7.29-7.33 (m, 2H), 7.41-7.43 (m, 2H);  $^{13}\text{C}$  NMR (100 MHz,  $\text{CDCl}_3$ ):  $\delta$  = 12.8, 17.0, 23.7, 53.3, 53.7, 118.2, 126.7, 126.9, 128.1, 136.6, 141.6, 181.8; IR (neat): 2964, 1696, 1458, 1272, 918, 699  $\text{cm}^{-1}$ ; HPLC (chiral column: CHIRALPAK IG; solvent: hexane/2-propanol = 100/1; flow rate: 1.0 mL/min; detection: at 210 nm; rt):  $t_R$  = 15.1 min; HRMS (ESI):  $m/z$  calcd for  $\text{C}_{14}\text{H}_{18}\text{O}_2$   $[\text{M}+\text{Na}]^+$  241.1199. Found 241.1189;  $[\alpha]_D^{20}$  = 98.9 ( $c$  = 0.69,  $\text{CHCl}_3$ ).

### (2R,3R)-3-ethyl-2-methyl-2-phenylpent-4-enoic acid ((2R,3R)-2r [(2R,3R)-2Et])

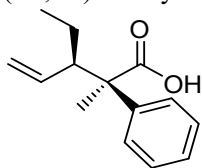

Yield: 70%;  $^1\text{H}$  NMR (400 MHz,  $\text{CDCl}_3$ ):  $\delta$  = 0.76 (t,  $J$  = 7.6 Hz, 3H), 0.96-1.07 (m, 1H), 1.13-1.24 (m, 1H), 1.52 (s, 3H), 2.79-2.84 (m, 1H), 5.12-5.17 (m, 2H), 5.55 (ddd,  $J$  = 19.7, 10.5, 9.2 Hz, 1H), 7.22-7.26 (m, 1H), 7.30-7.34 (m, 2H), 7.44 (d,  $J$  = 8.2 Hz, 2H);  $^{13}\text{C}$  NMR (100 MHz,  $\text{CDCl}_3$ ):  $\delta$  = 12.5, 17.2, 21.6, 52.5, 53.9, 118.8, 127.0, 127.2, 128.2, 137.7, 140.9, 181.2; IR (neat): 2963, 1698, 1457, 1273, 921, 697  $\text{cm}^{-1}$ ; HPLC (chiral column: CHIRALPAK IG; solvent: hexane/2-propanol = 100/1; flow rate: 1.0 mL/min; detection: at 210 nm; rt):  $t_R$  = 21.3 min; HRMS (ESI):  $m/z$  calcd for  $\text{C}_{14}\text{H}_{18}\text{O}_2$   $[\text{M}+\text{Na}]^+$  241.1199. Found 241.1198;  $[\alpha]_D^{20}$  = 79.2 ( $c$  = 0.85,  $\text{CHCl}_3$ ).

### HPLC chart

Racemate

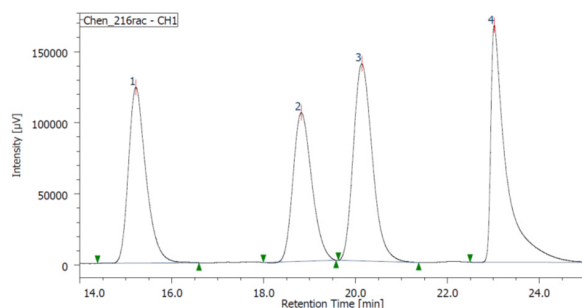

チャンネル情報+ピーク情報

クロマトグラム名 Chen\_216rac-CH1  
 サンプル名  
 チャンネル名 CH1  
 データ取り込み間隔 500 [msec]  
 波形処理メソッド (マニュアル)  
 数値計算式  
 判定式

| # | ピーク名    | CH | tR [min] | 面積 [μVsec] | 高さ [μV] | 面積%    | 高さ%    | 定量値 | NTP   | 分離度   | シメトリ係数 | 警告 |
|---|---------|----|----------|------------|---------|--------|--------|-----|-------|-------|--------|----|
| 1 | Unknown | I  | 15.217   | 3274956    | 123667  | 23.232 | 23.174 | N/A | 8165  | 5.076 | 1.358  |    |
| 2 | Unknown | I  | 18.817   | 2964459    | 104582  | 21.031 | 19.602 | N/A | 10126 | 1.758 | 1.245  |    |
| 3 | Unknown | I  | 20.133   | 3991837    | 138650  | 28.318 | 25.987 | N/A | 11415 | 4.695 | 1.271  |    |
| 4 | Unknown | I  | 23.017   | 3865227    | 166641  | 27.421 | 31.233 | N/A | 37135 | N/A   | 3.840  |    |

### (2S,3R)-2r

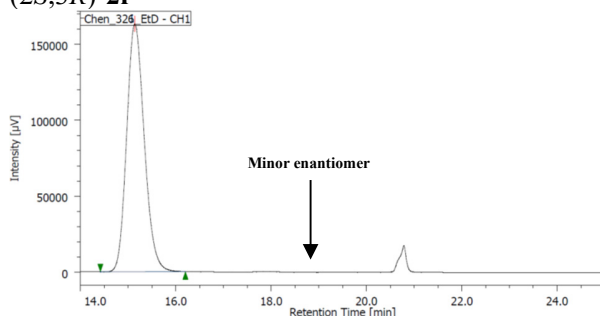

チャンネル情報+ピーク情報

クロマトグラム名 Chen\_326\_EtD-CH1  
 サンプル名  
 チャンネル名 CH1  
 データ取り込み間隔 500 [msec]  
 波形処理メソッド (マニュアル)  
 数値計算式  
 判定式

| # | ピーク名    | CH | tR [min] | 面積 [μVsec] | 高さ [μV] | 面積%     | 高さ%     | 定量値 | NTP  | 分離度 | シメトリ係数 | 警告 |
|---|---------|----|----------|------------|---------|---------|---------|-----|------|-----|--------|----|
| 1 | Unknown | I  | 15.142   | 4174378    | 163099  | 100.000 | 100.000 | N/A | 8176 | N/A | 1.183  |    |

### (2R,3R)-2r

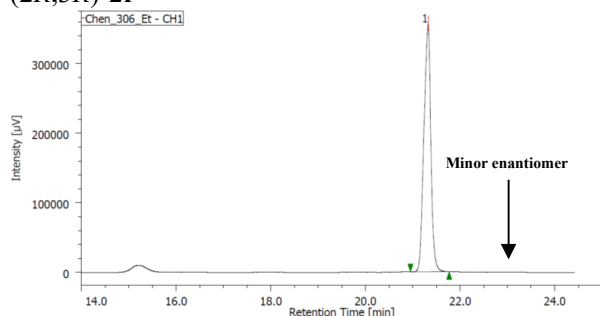

チャンネル情報+ピーク情報

クロマトグラム名 Chen\_306\_Et-CH1  
 サンプル名  
 チャンネル名 CH1  
 データ取り込み間隔 500 [msec]  
 波形処理メソッド (マニュアル)  
 数値計算式  
 判定式

| # | ピーク名    | CH | tR [min] | 面積 [μVsec] | 高さ [μV] | 面積%     | 高さ%     | 定量値 | NTP   | 分離度 | シメトリ係数 | 警告 |
|---|---------|----|----------|------------|---------|---------|---------|-----|-------|-----|--------|----|
| 1 | Unknown | I  | 21.325   | 3633475    | 356696  | 100.000 | 100.000 | N/A | 98794 | N/A | 0.907  |    |

### (2S,3R)-2-methyl-2-phenyl-3-vinylhexanoic acid ((2S,3R)-2s [(2S,3R)-2Pr])

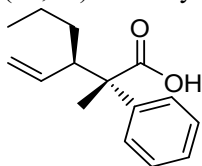

Yield: 95%; <sup>1</sup>H NMR (400 MHz, CDCl<sub>3</sub>): δ = 0.90 (t, *J* = 7.1 Hz, 3H), 1.19-1.43 (m, 4H), 1.55 (s, 3H), 2.88-2.93 (m, 1H), 4.75 (dd, *J* = 17.4, 1.8 Hz, 1H), 4.88 (dd, *J* = 10.1, 1.8 Hz, 1H), 5.32 (ddd, *J* = 17.4, 10.1, 10.1 Hz, 1H), 7.20-7.25 (m, 1H), 7.31 (t, *J* = 7.8 Hz, 2H), 7.42 (d, *J* = 7.3 Hz, 2H); <sup>13</sup>C NMR (100 MHz, CDCl<sub>3</sub>): δ = 14.0, 17.1, 21.1, 33.0, 51.0, 53.6, 117.9, 126.7, 126.9, 128.1, 137.0, 141.7, 181.0; IR (neat): 2961, 1697, 1457, 1267, 925, 697 cm<sup>-1</sup>; HPLC (chiral column: CHIRALPAK IG; solvent: hexane/2-propanol = 100/1; flow rate: 1.0 mL/min; detection: at 210 nm; rt): t<sub>R</sub> = 12.9 min; HRMS (ESI): m/z calcd for C<sub>15</sub>H<sub>20</sub>O<sub>2</sub> [M+Na]<sup>+</sup> 255.1356. Found 255.1344; [α]<sub>D</sub><sup>20</sup> = 97.4 (*c* = 0.39, CHCl<sub>3</sub>).

### (2R,3R)-2-methyl-2-phenyl-3-vinylhexanoic acid ((2R,3R)-2s [(2R,3R)-2Pr])

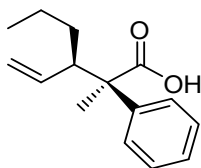

Yield: 82%;  $^1\text{H}$  NMR (400 MHz,  $\text{CDCl}_3$ ):  $\delta$  = 0.77 (t,  $J$  = 7.1 Hz, 3H), 1.02-1.36 (m, 4H), 1.53 (s, 3H), 2.93-2.99 (m, 1H), 5.11-5.18 (m, 2H), 5.59 (ddd,  $J$  = 19.7, 10.5, 9.2 Hz, 1H), 7.24-7.28 (m, 1H), 7.32-7.36 (m, 2H), 7.45-7.48 (m, 2H);  $^{13}\text{C}$  NMR (100 MHz,  $\text{CDCl}_3$ ):  $\delta$  = 13.8, 17.2, 20.8, 30.7, 50.1, 53.9, 118.5, 127.0, 127.2, 128.1, 138.1, 140.8, 181.2; IR (neat): 2957, 1698, 1458, 1277, 921, 697  $\text{cm}^{-1}$ ; HPLC (chiral column: CHIRALPAK IG; solvent: hexane/2-propanol = 100/1; flow rate: 1.0 mL/min; detection: at 210 nm; rt):  $t_R$  = 16.4 min; HRMS (ESI):  $m/z$  calcd for  $\text{C}_{15}\text{H}_{20}\text{O}_2$   $[\text{M}+\text{Na}]^+$  255.1356. Found 255.1363;  $[\alpha]_D^{20}$  = 52.1 ( $c$  = 1.1,  $\text{CHCl}_3$ ).

## HPLC chart

### Racemate

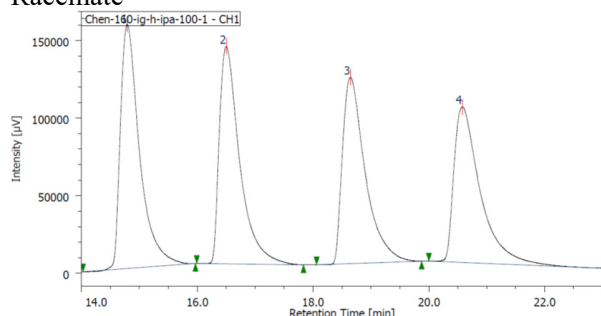

#### チャンネル情報+ピーク情報

クロマトグラム名 Chen-160-ig-h-100-1-CH1

サンプル名

チャンネル名 CH1

データ取り込み間隔 500 [msec]

波形処理メソッド (マニュアル)

数値計算式

判定式

| # | ピーク名    | CH | tR [min] | 面積 [μV·sec] | 高さ [μV] | 面積%    | 高さ%    | 定量値 | NTP   | 分離度   | シンメトリー係数 | 警告 |
|---|---------|----|----------|-------------|---------|--------|--------|-----|-------|-------|----------|----|
| 1 | Unknown | 1  | 14.792   | 3607596     | 157496  | 26.785 | 30.408 | N/A | 10992 | 2.933 | 1.908    |    |
| 2 | Unknown | 1  | 16.500   | 3416800     | 140133  | 25.369 | 27.056 | N/A | 11961 | 3.331 | 2.053    |    |
| 3 | Unknown | 1  | 18.642   | 3278221     | 120007  | 24.340 | 23.170 | N/A | 11819 | 2.668 | 1.963    |    |
| 4 | Unknown | 1  | 20.575   | 3166012     | 100305  | 23.507 | 19.366 | N/A | 11512 | N/A   | 2.236    |    |

### (2S,3R)-2s

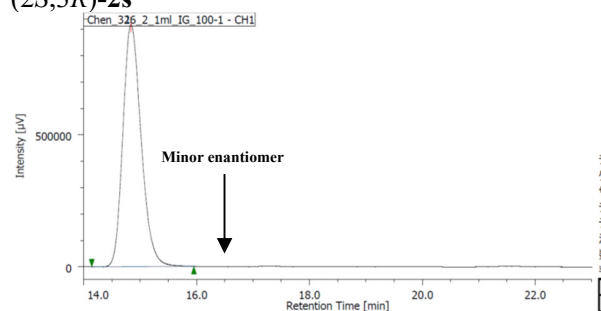

#### チャンネル情報+ピーク情報

クロマトグラム名 Chen\_326\_2\_1ml\_IG\_100-1-CH1

サンプル名

チャンネル名 CH1

データ取り込み間隔 500 [msec]

波形処理メソッド (マニュアル)

数値計算式

判定式

| # | ピーク名    | CH | tR [min] | 面積 [μV·sec] | 高さ [μV] | 面積%     | 高さ%     | 定量値 | NTP   | 分離度 | シンメトリー係数 | 警告 |
|---|---------|----|----------|-------------|---------|---------|---------|-----|-------|-----|----------|----|
| 1 | Unknown | 1  | 14.833   | 20614935    | 917107  | 100.000 | 100.000 | N/A | 10281 | N/A | 1.243    |    |

### (2R,3R)-2s

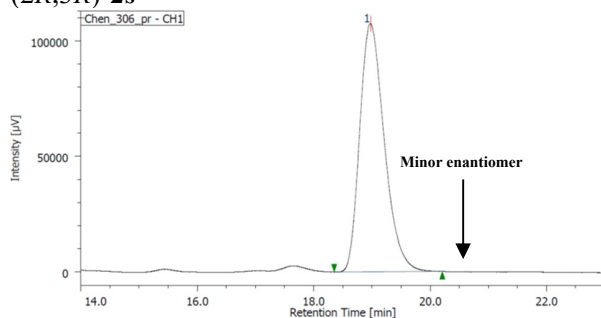

#### チャンネル情報+ピーク情報

クロマトグラム名 Chen\_306\_pr-CH1

サンプル名

チャンネル名 CH1

データ取り込み間隔 500 [msec]

波形処理メソッド (マニュアル)

数値計算式

判定式

| # | ピーク名    | CH | tR [min] | 面積 [μV·sec] | 高さ [μV] | 面積%     | 高さ%     | 定量値 | NTP  | 分離度 | シンメトリー係数 | 警告 |
|---|---------|----|----------|-------------|---------|---------|---------|-----|------|-----|----------|----|
| 1 | Unknown | 1  | 18.973   | 3155925     | 107599  | 100.000 | 100.000 | N/A | 9784 | N/A | 1.300    |    |

(2S,3R)-2-methyl-3-phenethyl-2-phenylpent-4-enoic acid ((2S,3R)-2t)

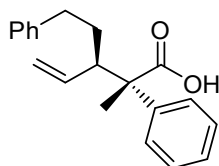

Yield: 63%;  $^1\text{H}$  NMR (400 MHz,  $\text{CDCl}_3$ ):  $\delta$  = 1.53 (s, 3H), 1.61-1.71 (m, 1H), 1.76-1.84 (m, 1H), 2.46-2.54 (m, 1H), 2.66-2.74 (m, 1H), 2.89-2.93 (m, 1H), 4.85 (dd,  $J$  = 18.8, 1.6 Hz, 1H), 4.99 (dd,  $J$  = 10.5, 1.6 Hz, 1H), 5.41 (ddd,  $J$  = 18.8, 10.5, 9.6 Hz, 1H), 7.13-7.36 (m, 10H);  $^{13}\text{C}$  NMR (100 MHz,  $\text{CDCl}_3$ ):  $\delta$  = 17.7, 32.7, 34.3, 51.1, 53.7, 118.6, 125.7, 126.6, 126.9, 128.2, 128.3, 128.5, 136.7, 141.5, 142.2, 181.3; IR (neat): 2930, 1697, 1496, 1268, 920, 699  $\text{cm}^{-1}$ ; HPLC (chiral column: CHIRALPAK IC-3; solvent: hexane/2-propanol = 50/1; flow rate: 1.0 mL/min; detection: at 210 nm; rt):  $t_R$  = 9.5 min; HRMS (ESI):  $m/z$  calcd for  $\text{C}_{20}\text{H}_{22}\text{O}_2$   $[\text{M}+\text{Na}]^+$  317.1512. Found 317.1523;  $[\alpha]_D^{20}$  = 35.0 ( $c$  = 1.8,  $\text{CHCl}_3$ ).

### (2R,3R)-2-methyl-3-phenethyl-2-phenylpent-4-enoic acid ((2R,3R)-2t)

Yield: 89%;  $^1\text{H}$  NMR (400 MHz,  $\text{CDCl}_3$ ):  $\delta$  = 1.33-1.48 (m, 2H), 1.53 (s, 3H), 2.32-2.40 (m, 1H), 2.61-2.68 (m, 1H), 2.96-3.01 (m, 1H), 5.20-5.25 (m, 2H), 5.63-5.72 (m, 1H), 6.99-7.01 (m, 2H), 7.11-7.33 (m, 8H);  $^{13}\text{C}$  NMR (100 MHz,  $\text{CDCl}_3$ ):  $\delta$  = 16.9, 30.3, 33.7, 49.4, 53.7, 119.3, 125.7, 127.0, 127.2, 128.2, 128.2, 128.5, 137.7, 140.5, 141.9, 181.1; IR (neat): 2945, 1698, 1496, 1274, 924, 698  $\text{cm}^{-1}$ ; HPLC (chiral column: CHIRALPAK IC-3; solvent: hexane/2-propanol = 50/1; flow rate: 1.0 mL/min; detection: at 210 nm; rt):  $t_R$  = 6.5 min; HRMS (ESI):  $m/z$  calcd for  $\text{C}_{20}\text{H}_{22}\text{O}_2$   $[\text{M}+\text{Na}]^+$  317.1512. Found 317.1523;  $[\alpha]_D^{20}$  = 30.5 ( $c$  = 1.4,  $\text{CHCl}_3$ ).

### HPLC chart

#### Racemate

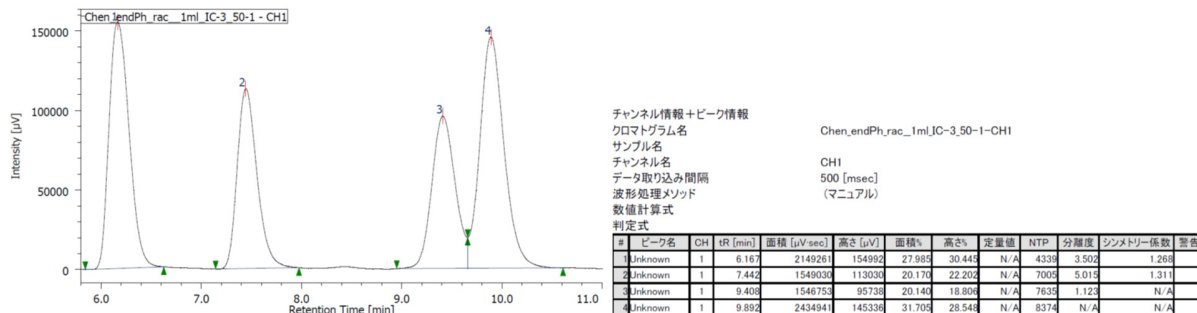

#### (2S,3R)-2t

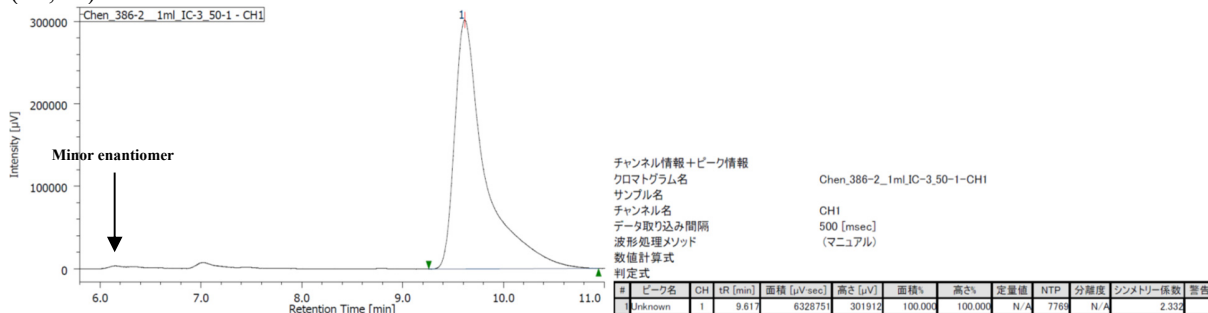

#### (2R,3R)-2t



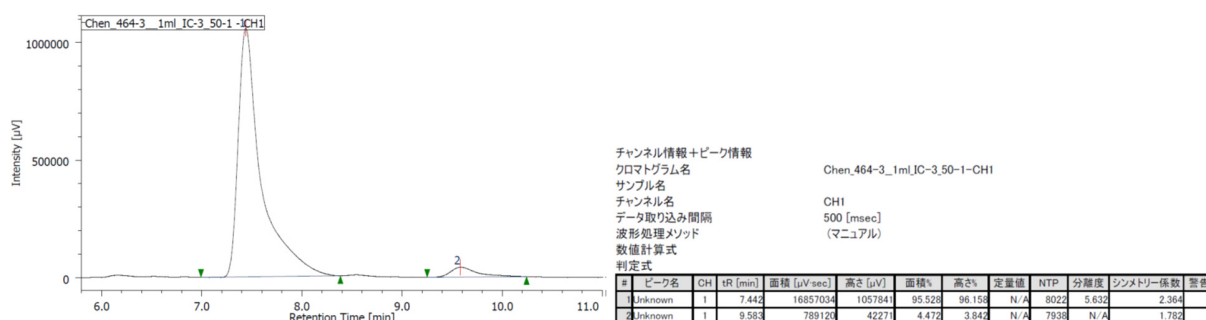

**(2*S*,3*R*)-7-chloro-2-methyl-2-phenyl-3-vinylheptanoic acid ((2*S*,3*R*)-**2u**)**

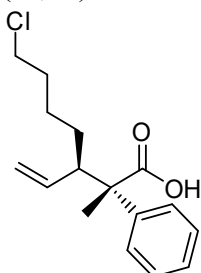

Yield: 84%;  $^1\text{H}$  NMR (400 MHz,  $\text{CDCl}_3$ ):  $\delta$  = 1.32-1.53 (m, 4H), 1.55 (s, 3H), 1.68-1.86 (m, 2H), 2.85-2.90 (m, 1H), 3.52 (t,  $J$  = 6.9 Hz, 2H), 4.77 (dd,  $J$  = 18.5, 1.6 Hz, 1H), 4.91 (dd,  $J$  = 10.3, 1.6 Hz, 1H), 5.32 (ddd,  $J$  = 18.5, 10.3, 9.2 Hz, 1H), 7.22-7.26 (m, 1H), 7.32 (t,  $J$  = 7.3 Hz, 2H), 7.40 (d,  $J$  = 8.7 Hz, 2H);  $^{13}\text{C}$  NMR (100 MHz,  $\text{CDCl}_3$ ):  $\delta$  = 17.1, 25.3, 29.9, 32.3, 45.0, 51.1, 53.7, 118.4, 126.6, 127.0, 128.2, 136.6, 141.4, 181.9; IR (neat): 2940, 1697, 1445, 1273, 920, 700  $\text{cm}^{-1}$ ; HPLC (chiral column: CHIRALCEL OZ-H; solvent: hexane/2-propanol = 100/1; flow rate: 1.0 mL/min; detection: at 210 nm; rt):  $t_R$  = 31.8 min; HRMS (ESI):  $m/z$  calcd for  $\text{C}_{16}\text{H}_{21}\text{ClO}_2$   $[\text{M}+\text{Na}]^+$  303.1122. Found 303.1115;  $[\alpha]_D^{20}$  = 54.4 ( $c$  = 0.90,  $\text{CHCl}_3$ ).

**(2*R*,3*R*)-7-chloro-2-methyl-2-phenyl-3-vinylheptanoic acid ((2*R*,3*R*)-**2u**)**

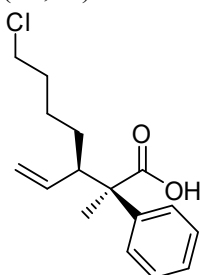

Yield: 81%;  $^1\text{H}$  NMR (500 MHz,  $\text{CDCl}_3$ ):  $\delta$  = 1.07-1.13 (m, 2H), 1.17-1.26 (m, 1H), 1.39-1.46 (m, 1H), 1.56 (s, 3H), 1.56-1.59 (m, 1H), 1.64-1.72 (m, 1H), 2.92-2.95 (m, 1H), 3.40 (td,  $J$  = 6.7, 1.9 Hz, 2H), 5.15-5.19 (m, 2H), 5.57 (ddd,  $J$  = 17.2, 8.3, 8.3 Hz, 1H), 7.25-7.28 (m, 1H), 7.34 (t,  $J$  = 7.7 Hz, 2H), 7.44-7.46 (m, 2H);  $^{13}\text{C}$  NMR (100 MHz,  $\text{CDCl}_3$ ):  $\delta$  = 17.2, 25.0, 27.8, 32.2, 44.8, 50.2, 53.8, 119.0, 127.1, 127.2, 128.2, 137.6, 140.5, 181.4; IR (neat): 2940, 1698, 1445, 1273, 923, 699  $\text{cm}^{-1}$ ; HPLC (chiral column: CHIRALCEL OZ-H; solvent: hexane/2-propanol = 100/1; flow rate: 1.0 mL/min; detection: at 210 nm; rt):  $t_R$  = 13.0 min; HRMS (ESI):  $m/z$  calcd for  $\text{C}_{16}\text{H}_{21}\text{ClO}_2$   $[\text{M}+\text{Na}]^+$  303.1122. Found 303.1115;  $[\alpha]_D^{20}$  = 40.2 ( $c$  = 1.8,  $\text{CHCl}_3$ ).

HPLC chart  
 Racemate



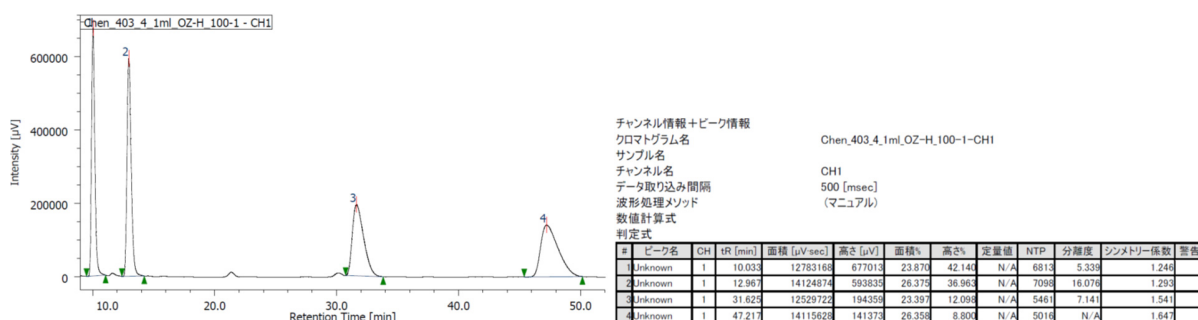

(2S,3R)-2u

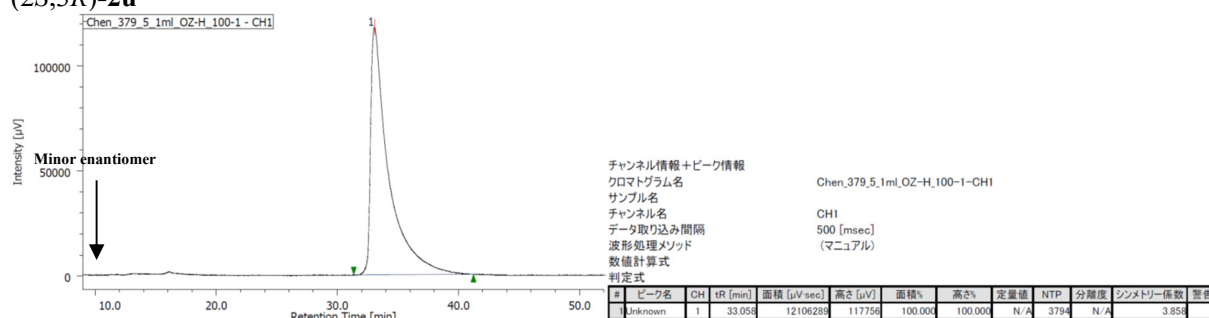

(2R,3R)-2u

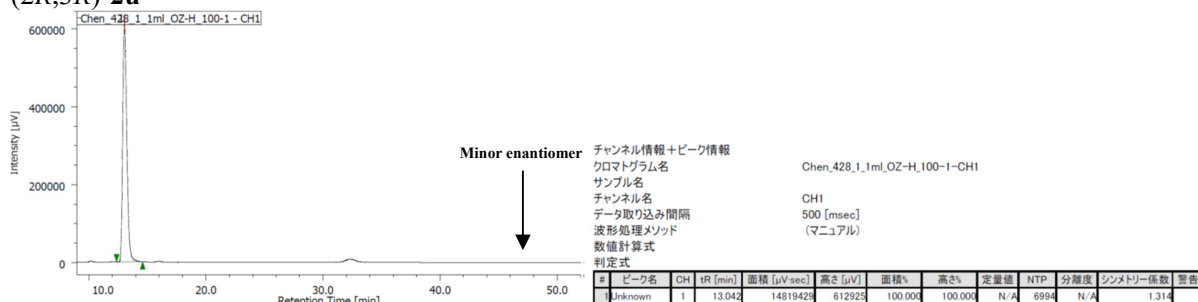

(2S,3R)-7-cyano-2-methyl-2-phenyl-3-vinylheptanoic acid ((2S,3R)-2v)

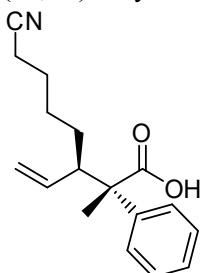

Yield: 54%;  $^1\text{H}$  NMR (400 MHz,  $\text{CDCl}_3$ ):  $\delta$  = 1.36-1.55 (m, 9H), 2.31 (t,  $J$  = 6.9 Hz, 2H), 2.82-2.86 (m, 1H), 4.77 (dd,  $J$  = 17.2, 1.1 Hz, 1H), 4.91 (dd,  $J$  = 9.3, 1.7 Hz, 1H), 5.32 (ddd,  $J$  = 17.2, 9.3, 8.3 Hz, 1H), 7.23-7.25 (m, 1H), 7.30-7.33 (m, 2H), 7.34-7.39 (m, 2H);  $^{13}\text{C}$  NMR (100 MHz,  $\text{CDCl}_3$ ):  $\delta$  = 17.0, 17.3, 25.0, 27.0, 29.7, 51.1, 53.5, 118.6, 119.7, 126.5, 127.1, 128.3, 136.4, 141.3, 180.8; IR (neat): 3074, 2935, 2247, 1698, 1446, 1270, 1095, 921, 701  $\text{cm}^{-1}$ ; HPLC (chiral column: CHIRALCEL OZ-H; solvent: hexane/2-propanol = 10/1; flow rate: 1.0 mL/min; detection: at 210 nm; rt):  $t_R$  = 10.0 min; HRMS (ESI):  $m/z$  calcd for  $\text{C}_{17}\text{H}_{21}\text{NO}_2$   $[\text{M}+\text{Na}]^+$  294.1465. Found 294.1473;  $[\alpha]_D^{20}$  = 55.6 ( $c$  = 0.77,  $\text{CHCl}_3$ ).

(2R,3R)-7-cyano-2-methyl-2-phenyl-3-vinylheptanoic acid ((2R,3R)-2v)

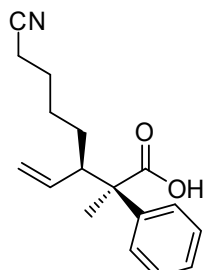

Yield: 82%;  $^1\text{H}$  NMR (400 MHz,  $\text{CDCl}_3$ ):  $\delta$  = 1.01-1.15 (m, 2H), 1.18-1.26 (m, 1H), 1.37-1.57 (m, 6H), 2.18 (t,  $J$  = 7.1 Hz, 2H), 2.89-2.94 (m, 1H), 5.15-5.19 (m, 2H), 5.56 (ddd,  $J$  = 16.9, 9.0, 9.0 Hz, 1H), 7.26-7.29 (m, 1H), 7.33-7.36 (m, 2H), 7.43-7.45 (m, 2H);  $^{13}\text{C}$  NMR (100 MHz,  $\text{CDCl}_3$ ):  $\delta$  = 16.9, 17.2, 24.9, 26.7, 27.6, 50.1, 53.7, 119.2, 119.6, 127.1, 127.2, 128.3, 137.4, 140.4, 181.2; IR (neat): 3062, 2942, 2247, 1697, 1445, 1271, 1121, 925, 701  $\text{cm}^{-1}$ ; HPLC (chiral column: CHIRALCEL OZ-H; solvent: hexane/2-propanol = 10/1; flow rate: 1.0 mL/min; detection: at 210 nm; rt):  $t_R$  = 7.1 min; HRMS (ESI):  $m/z$  calcd for  $\text{C}_{17}\text{H}_{21}\text{NO}_2$   $[\text{M}+\text{Na}]^+$  294.1465. Found 294.1492;  $[\alpha]_D^{20}$  = 40.0 ( $c$  = 1.9,  $\text{CHCl}_3$ ).

## HPLC chart

### Racemate

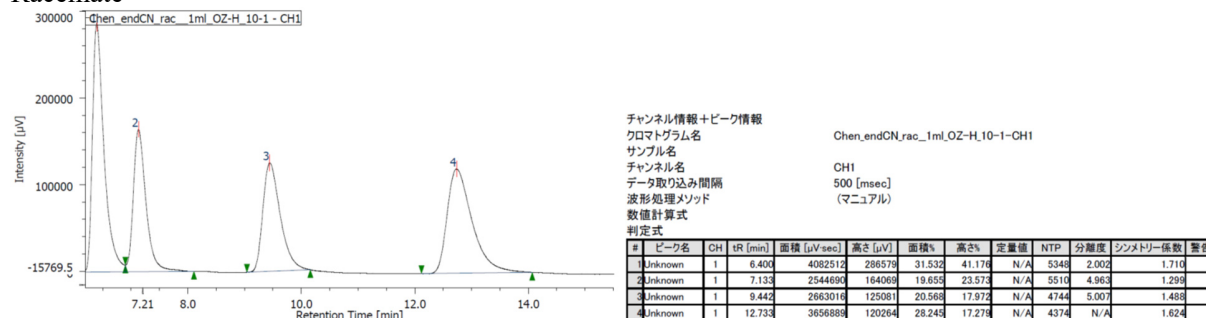

### (2S,3R)-2v

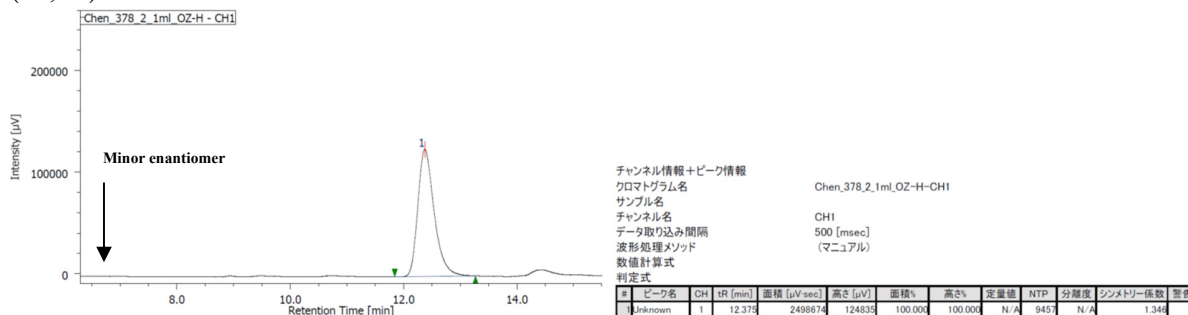

### (2R,3R)-2v

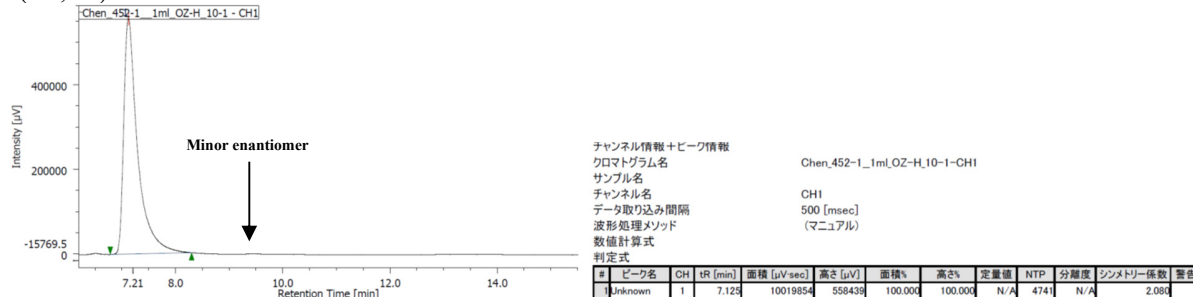

### (2S,3R)-7-azido-2-methyl-2-phenyl-3-vinylheptanoic acid ((2S,3R)-2w)

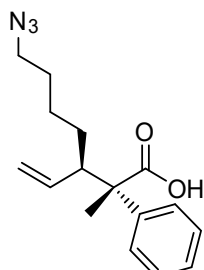

Yield: 87%;  $^1\text{H}$  NMR (400 MHz,  $\text{CDCl}_3$ ):  $\delta$  = 1.26-1.71 (m, 9H), 2.84-2.89 (m, 1H), 3.24 (t,  $J$  = 7.1 Hz, 2H), 4.76 (dd,  $J$  = 18.8, 1.8 Hz, 1H), 4.91 (dd,  $J$  = 10.5, 1.8 Hz, 1H), 5.32 (ddd,  $J$  = 18.8, 10.5, 10.5 Hz, 1H), 7.22-7.26 (m, 1H), 7.32 (dd,  $J$  = 7.8, 7.8 Hz, 2H), 7.39-7.41 (m, 2H);  $^{13}\text{C}$  NMR (100 MHz,  $\text{CDCl}_3$ ):  $\delta$  = 17.2, 25.1, 28.6, 30.2, 51.2, 51.3, 53.6, 118.4, 126.6, 127.0, 128.2, 136.6, 141.4, 181.5; IR (neat): 2939, 2095, 1697, 1269, 920, 700  $\text{cm}^{-1}$ ; HPLC (chiral column: CHIRALCEL OZ-H; solvent: hexane/2-propanol = 100/1; flow rate: 1.0 mL/min; detection: at 210 nm; rt):  $t_R$  = 34.0 min; HRMS (ESI):  $m/z$  calcd for  $\text{C}_{16}\text{H}_{21}\text{N}_3\text{O}_2$   $[\text{M}+\text{Na}]^+$  310.1526. Found 310.1541;  $[\alpha]_D^{20}$  = 67.5 ( $c$  = 1.1,  $\text{CHCl}_3$ ).

#### (2R,3R)-7-azido-2-methyl-2-phenyl-3-vinylheptanoic acid ((2R,3R)-2w)

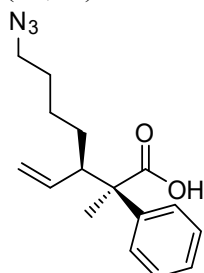

Yield: 70%;  $^1\text{H}$  NMR (400 MHz,  $\text{CDCl}_3$ ):  $\delta$  = 1.01-1.19 (m, 3H), 1.32-1.54 (m, 6H), 2.90-2.96 (m, 1H), 3.13 (t,  $J$  = 7.1 Hz, 2H), 5.14-5.19 (m, 2H), 5.57 (ddd,  $J$  = 19.7, 10.5, 9.2 Hz, 1H), 7.25-7.29 (m, 1H), 7.32-7.36 (m, 2H), 7.44-7.47 (m, 2H);  $^{13}\text{C}$  NMR (100 MHz,  $\text{CDCl}_3$ ):  $\delta$  = 17.2, 24.8, 28.0, 28.4, 50.3, 51.2, 53.8, 119.0, 127.1, 127.2, 128.2, 137.6, 140.5, 181.3; IR (neat): 2941, 2095, 1698, 1272, 924, 699  $\text{cm}^{-1}$ ; HPLC (chiral column: CHIRALCEL OZ-H; solvent: hexane/2-propanol = 100/1; flow rate: 1.0 mL/min; detection: at 210 nm; rt):  $t_R$  = 14.4 min; HRMS (ESI):  $m/z$  calcd for  $\text{C}_{16}\text{H}_{21}\text{N}_3\text{O}_2$   $[\text{M}+\text{Na}]^+$  310.1526. Found 310.1534;  $[\alpha]_D^{20}$  = 43.1 ( $c$  = 1.3,  $\text{CHCl}_3$ ).

#### HPLC chart

##### Racemate

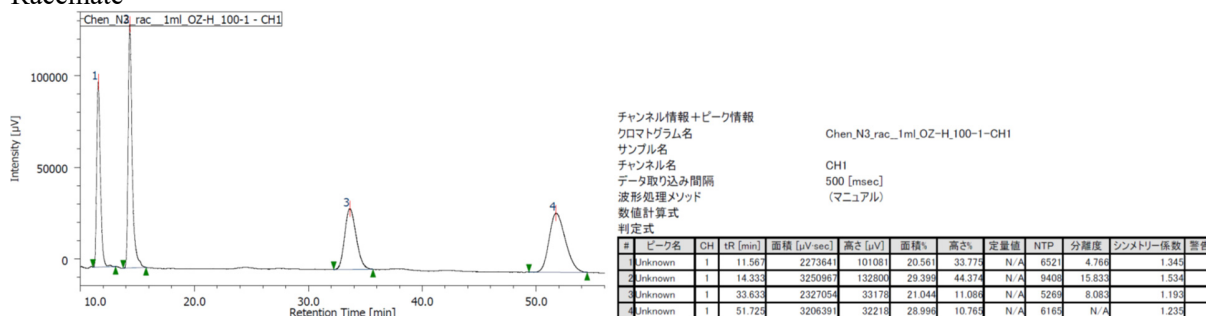

##### (2S,3R)-2w

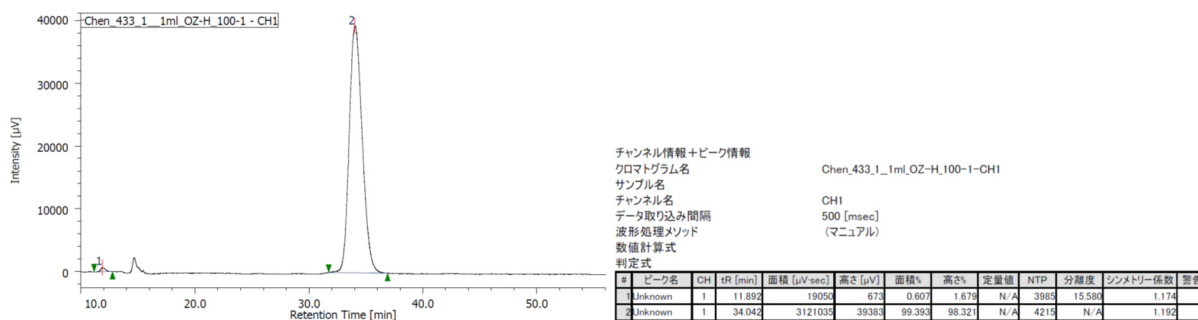

(2*R*,3*R*)-**2w**

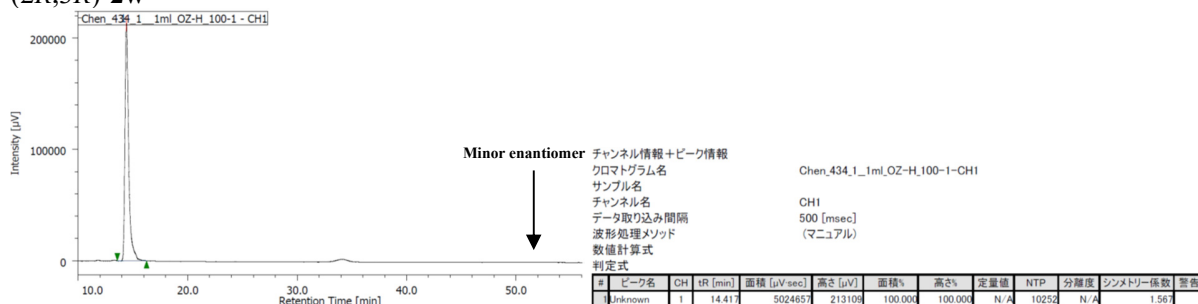

(2*S*,3*R*)-8-(*tert*-butoxy)-2-methyl-8-oxo-2-phenyl-3-vinyloctanoic acid ((2*S*,3*R*)-**2x**)

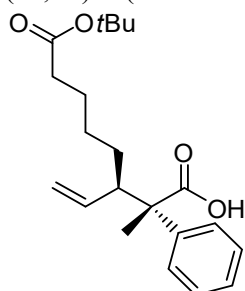

Yield: 97%;  $^1\text{H}$  NMR (500 MHz,  $\text{CDCl}_3$ ):  $\delta$  = 1.24-1.41 (m, 5H), 1.44 (s, 9H), 1.54 (s, 3H), 1.59-1.66 (m, 1H), 2.17-2.21 (m, 2H), 2.84-2.88 (m, 1H), 4.75 (dd,  $J$  = 17.6, 1.6 Hz, 1H), 4.88 (dd,  $J$  = 9.8, 1.6 Hz, 1H), 5.31 (ddd,  $J$  = 17.6, 9.8, 8.0 Hz, 1H), 7.21-7.24 (m, 1H), 7.31 (t,  $J$  = 7.7 Hz, 2H), 7.39-7.41 (m, 2H);  $^{13}\text{C}$  NMR (125 MHz,  $\text{CDCl}_3$ ):  $\delta$  = 17.2, 25.0, 27.5, 28.1, 30.4, 35.5, 51.2, 53.7, 79.9, 118.1, 126.6, 126.9, 128.2, 136.8, 141.6, 173.3, 181.3; IR (neat): 2979, 2935, 1731, 1257, 1154, 918, 700  $\text{cm}^{-1}$ ; HPLC (chiral column: CHIRALCEL OZ-H; solvent: hexane/2-propanol = 100/1; flow rate: 1.0 mL/min; detection: at 210 nm; rt):  $t_R$  = 72.9 min; HRMS (ESI):  $m/z$  calcd for  $\text{C}_{21}\text{H}_{30}\text{O}_4$   $[\text{M}+\text{Na}]^+$  369.2036. Found 369.2024;  $[\alpha]_D^{20}$  = 51.6 ( $c$  = 1.4,  $\text{CHCl}_3$ ).

(2*R*,3*R*)-8-(*tert*-butoxy)-2-methyl-8-oxo-2-phenyl-3-vinyloctanoic acid ((2*R*,3*R*)-**2x**)

Yield: 88%;  $^1\text{H}$  NMR (500 MHz,  $\text{CDCl}_3$ ):  $\delta$  = 1.06-1.13 (m, 3H), 1.25-1.38 (m, 3H), 1.40 (s, 9H), 1.53 (s, 3H), 2.06-2.09 (m, 2H), 2.91-2.95 (m, 1H), 5.12-5.17 (m, 2H), 5.57 (ddd,  $J$  = 16.0, 8.6, 8.6 Hz, 1H), 7.24-7.27 (m, 1H), 7.33 (t,  $J$  = 7.7 Hz, 2H), 7.45 (d,  $J$  = 7.4 Hz, 2H);  $^{13}\text{C}$  NMR (125 MHz,  $\text{CDCl}_3$ ):  $\delta$  = 17.1, 24.8, 27.2, 28.0, 28.2, 35.4, 50.2, 53.8, 79.9, 118.7, 127.0, 127.2, 128.2, 137.9, 140.7, 173.1, 181.1; IR (neat): 2979, 2936, 1731, 1257, 1154, 921, 699  $\text{cm}^{-1}$ ; HPLC (chiral column: CHIRALCEL OZ-H; solvent: hexane/2-propanol = 100/1; flow rate: 1.0 mL/min; detection: at 210 nm; rt):  $t_R$  = 23.5 min; HRMS (ESI):  $m/z$  calcd for  $\text{C}_{21}\text{H}_{30}\text{O}_4$   $[\text{M}+\text{Na}]^+$  369.2036. Found 369.2024;  $[\alpha]_D^{20}$  = 37.0 ( $c$  = 1.5,  $\text{CHCl}_3$ ).

## HPLC chart

### Racemate

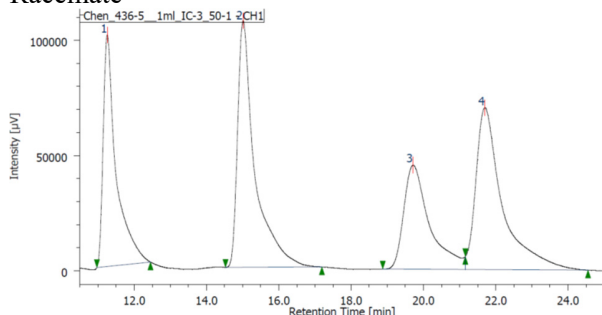

#### チャンネル情報+ピーク情報

クロマトグラム名 Chen\_436-5\_1ml\_IC-3\_50-1-CH1  
 サンプル名  
 チャンネル名 CH1  
 データ取り込み間隔 500 [msec]  
 波形処理メソッド (マニュアル)  
 数値計算式  
 判定式

| # | ピーク名    | CH | tR [min] | 面積 [μVsec] | 高さ [μV] | 面積%    | 高さ%    | 定量値 | NTP  | 分離度   | シメトリ係数 | 警告 |
|---|---------|----|----------|------------|---------|--------|--------|-----|------|-------|--------|----|
| 1 | Unknown | 1  | 11.258   | 2493042    | 100441  | 21.048 | 31.111 | N/A | 7517 | 6.208 | 2.395  |    |
| 2 | Unknown | 1  | 15.008   | 3535501    | 106988  | 29.850 | 33.138 | N/A | 7528 | 5.155 | 2.421  |    |
| 3 | Unknown | 1  | 19.708   | 2242475    | 45178   | 18.933 | 13.994 | N/A | 4811 | 1.782 | N/A    |    |
| 4 | Unknown | 1  | 21.700   | 3573031    | 70248   | 30.167 | 21.757 | N/A | 6176 | N/A   | N/A    |    |

### (2S,3R)-2x

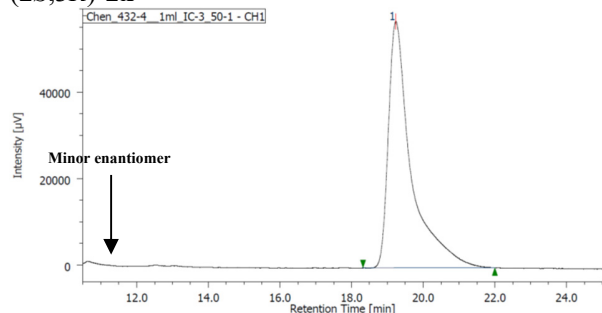

#### チャンネル情報+ピーク情報

クロマトグラム名 Chen\_432-4\_1ml\_IC-3\_50-1-CH1  
 サンプル名  
 チャンネル名 CH1  
 データ取り込み間隔 500 [msec]  
 波形処理メソッド (マニュアル)  
 数値計算式  
 判定式

| # | ピーク名    | CH | tR [min] | 面積 [μVsec] | 高さ [μV] | 面積%     | 高さ%     | 定量値 | NTP  | 分離度 | シメトリ係数 | 警告 |
|---|---------|----|----------|------------|---------|---------|---------|-----|------|-----|--------|----|
| 1 | Unknown | 1  | 19.233   | 2520190    | 56983   | 100.000 | 100.000 | N/A | 6745 | N/A | 2.403  |    |

### (2R,3R)-2x

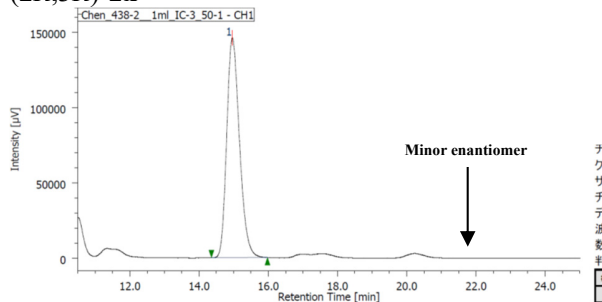

#### チャンネル情報+ピーク情報

クロマトグラム名 Chen\_438-2\_1ml\_IC-3\_50-1-CH1  
 サンプル名  
 チャンネル名 CH1  
 データ取り込み間隔 500 [msec]  
 波形処理メソッド (マニュアル)  
 数値計算式  
 判定式

| # | ピーク名    | CH | tR [min] | 面積 [μVsec] | 高さ [μV] | 面積%     | 高さ%     | 定量値 | NTP  | 分離度 | シメトリ係数 | 警告 |
|---|---------|----|----------|------------|---------|---------|---------|-----|------|-----|--------|----|
| 1 | Unknown | 1  | 14.958   | 3728213    | 145816  | 100.000 | 100.000 | N/A | 8030 | N/A | 1.260  |    |

(2S,3R)-2-(3-benzoylphenyl)-2-methyl-3-vinylheptanoic acid ((2S,3R)-2y)

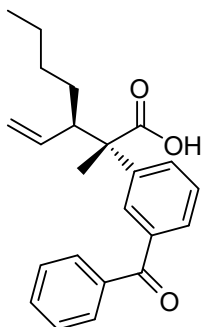

Yield: 81%;  $^1\text{H}$  NMR (400 MHz,  $\text{CDCl}_3$ ):  $\delta$  = 0.86 (t,  $J$  = 6.6 Hz, 3H), 1.20-1.45 (m, 6H), 1.58 (s, 3H), 2.87-2.92 (m, 1H), 4.75 (dd,  $J$  = 17.4, 1.8 Hz, 1H), 4.91 (dd,  $J$  = 10.3, 1.8 Hz, 1H), 5.33 (ddd,  $J$  = 17.4, 10.3, 10.3 Hz, 1H), 7.41-7.46 (m, 3H), 7.57 (t,  $J$  = 7.8 Hz, 1H), 7.67 (t,  $J$  = 8.2 Hz, 2H), 7.77 (d,  $J$  = 8.2 Hz, 2H), 7.85 (s, 1H);  $^{13}\text{C}$  NMR (100 MHz,  $\text{CDCl}_3$ ):  $\delta$  = 14.0, 17.0, 22.6, 30.2, 30.5, 51.3, 53.8, 118.5, 128.1, 128.2, 128.5, 128.8, 130.1, 131.0, 132.5, 136.7, 137.4, 137.4, 142.0, 181.1, 196.7; IR (neat): 2930, 1698, 1661, 1448, 1279, 1106, 920, 714  $\text{cm}^{-1}$ ; HPLC (chiral column: CHIRALCEL OZ-H; solvent: hexane/2-propanol = 100/1; flow rate: 1.0 mL/min; detection: at 210 nm; rt):  $t_R$  = 37.2 min; HRMS (ESI):  $m/z$  calcd for  $\text{C}_{23}\text{H}_{26}\text{O}_3$   $[\text{M}+\text{Na}]^+$  373.1774. Found 373.1788;  $[\alpha]_D^{20}$  = 65.1 ( $c$  = 1.6,  $\text{CHCl}_3$ ).

(2*R*,3*R*)-2-(3-benzoylphenyl)-2-methyl-3-vinylheptanoic acid ((2*R*,3*R*)-2y)

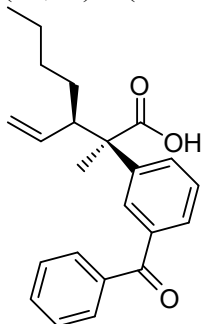

Yield: 75%;  $^1\text{H}$  NMR (500 MHz,  $\text{CDCl}_3$ ):  $\delta$  = 0.78 (t,  $J$  = 6.9 Hz, 3H), 1.05-1.28 (m, 6H), 1.57 (s, 3H), 2.90-2.94 (m, 1H), 5.13-5.16 (m, 2H), 5.53-5.60 (m, 1H), 7.42-7.48 (m, 3H), 7.59 (t,  $J$  = 7.4 Hz, 1H), 7.69-7.72 (m, 2H), 7.78-7.80 (m, 2H), 7.91 (s, 1H);  $^{13}\text{C}$  NMR (125 MHz,  $\text{CDCl}_3$ ):  $\delta$  = 14.0, 17.4, 22.4, 28.4, 29.9, 50.5, 54.1, 118.9, 128.1, 128.2, 128.9, 129.1, 130.1, 131.5, 132.5, 137.4, 137.4, 137.7, 141.2, 181.1, 196.6; IR (neat): 2931, 1700, 1661, 1448, 1278, 1133, 922, 710  $\text{cm}^{-1}$ ; HPLC (chiral column: CHIRALCEL OZ-H; solvent: hexane/2-propanol = 100/1; flow rate: 1.0 mL/min; detection: at 210 nm; rt):  $t_R$  = 55.9 min; HRMS (ESI):  $m/z$  calcd for  $\text{C}_{23}\text{H}_{26}\text{O}_3$   $[\text{M}+\text{Na}]^+$  373.1774. Found 373.1788;  $[\alpha]_D^{20}$  = 47.7 ( $c$  = 1.7,  $\text{CHCl}_3$ ).

## HPLC chart

### Racemate

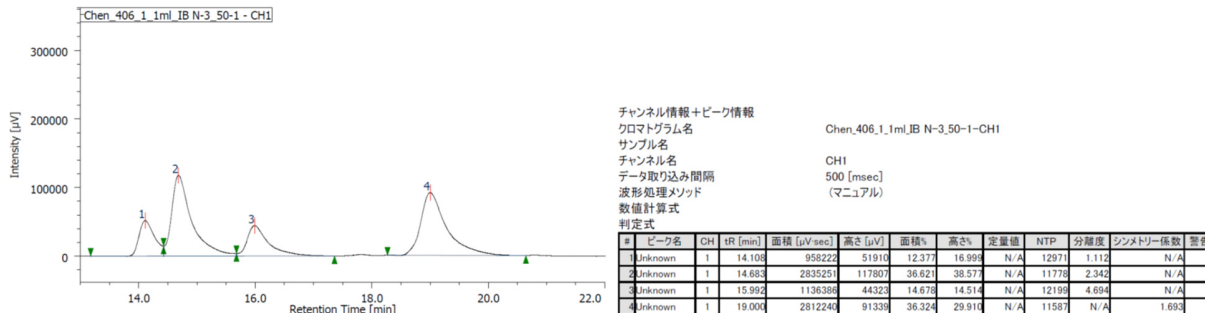

**(2*S*,3*R*)-2y**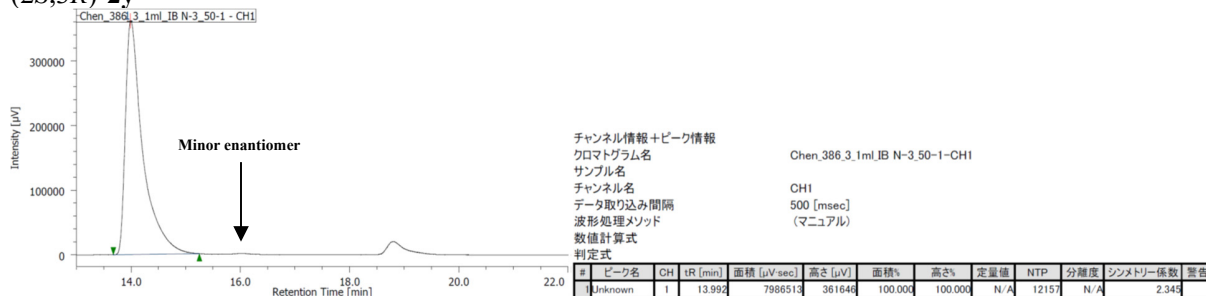**(2*R*,3*R*)-2y**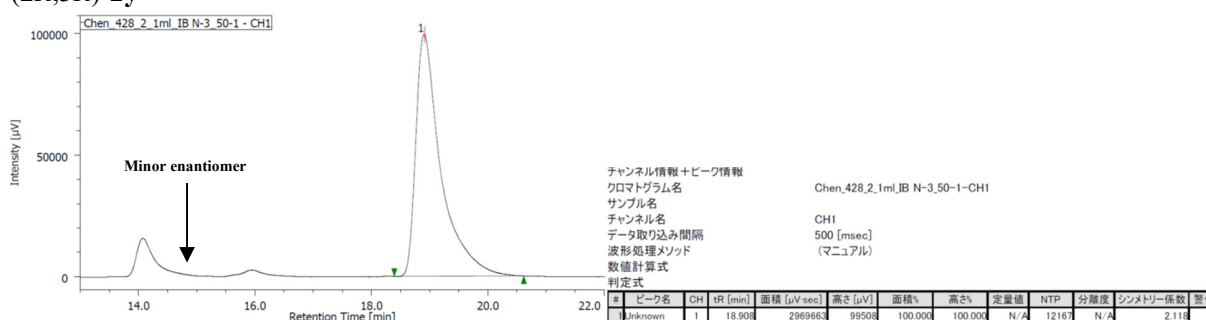

**(2*S*,3*R*)-2-(4-(2-(5-fluoro-2-methyl-1-((*Z*)-4-(methylsulfinyl)benzylidene)-1*H*-inden-3-yl)acetamido)phenyl)-2-methyl-3-vinylheptanoic acid**

**((2*S*,3*R*)-2z)**

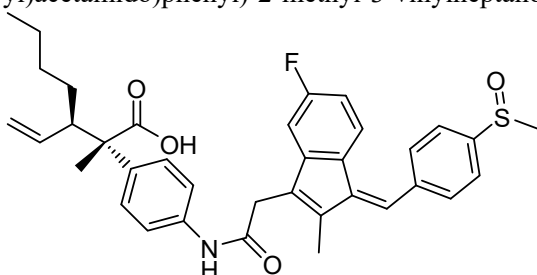

[Ir(cod)Cl]<sub>2</sub> (10.0 mg, 0.015 mmol, 0.05 equiv), ligand **L18** (0.030 mmol, 0.10 equiv), (AcO)<sub>4</sub>B<sub>2</sub>O (16.4 mg, 0.060 mmol, 0.2 equiv) and (*R*)-((2,3,5,6-tetrafluoro-4-methoxyphenyl)sulfonyl)-valine (**R**, 43.2 mg, 0.120 mmol, 0.4 equiv) were used.

Yield: 74%; <sup>1</sup>H NMR (400 MHz, CDCl<sub>3</sub>): δ = 0.85 (t, *J* = 6.6 Hz, 3H), 1.18-1.45 (m, 6H), 1.49 (s, 3H), 2.23 (s, 3H), 2.79-2.82 (m, 4H), 3.65 (s, 2H), 4.71 (dd, *J* = 18.5, 1.8 Hz, 1H), 4.84 (dd, *J* = 9.6, 1.8 Hz, 1H), 5.27 (ddd, *J* = 18.5, 9.6, 9.6 Hz, 1H), 6.55-6.60 (m, 1H), 6.90 (dd, *J* = 8.7, 1.8 Hz, 1H), 7.16-7.19 (m, 2H), 7.29 (d, *J* = 9.2 Hz, 2H), 7.38 (d, *J* = 8.7 Hz, 2H), 7.59 (s, 1H), 7.66 (d, *J* = 8.2 Hz, 2H), 7.73 (d, *J* = 8.2 Hz, 2H); <sup>13</sup>C NMR (125 MHz, CDCl<sub>3</sub>): δ = 10.6, 14.0, 16.8, 22.6, 30.3, 30.5, 34.5, 43.6, 51.1, 53.3, 106.0 (d, *J* = 23.9 Hz), 111.3 (d, *J* = 22.0 Hz), 118.0, 119.8, 123.9 (d, *J* = 11.5 Hz), 127.3, 128.9, 129.5, 129.5, 130.3, 132.2, 136.1, 137.0, 138.3, 139.0, 139.5, 141.4, 145.1, 146.3 (d, *J* = 7.7 Hz), 163.4 (d, *J* = 246.1 Hz), 167.7, 180.0; <sup>19</sup>F NMR (369 MHz, CDCl<sub>3</sub>): δ = -112.01; IR (neat): 2930, 2360, 1699, 1603, 1540, 1088, 756 cm<sup>-1</sup>; Enantiomeric excess was determined after hydrolysis of phenyl amide (**2S,3R**)-**2z**. HPLC (chiral column: CHIRALCEL OZ-H; solvent: hexane/2-propanol = 4/1; flow rate: 1.0 mL/min; detection: at 210 nm; rt): *t*<sub>R</sub> = 22.5 min. HRMS (ESI): *m/z* calcd for C<sub>36</sub>H<sub>38</sub>FN<sub>4</sub>O<sub>4</sub>S [M+Na]<sup>+</sup> 622.2398. Found 622.2375; [α]<sub>D</sub><sup>20</sup> = 20.8 (*c* = 2.05, CHCl<sub>3</sub>).

(2*R*,3*R*)-2-(4-(2-(5-fluoro-2-methyl-1-((*Z*)-4-(methylsulfinyl)benzylidene)-1*H*-inden-3-yl)acetamido)phenyl)-2-methyl-3-vinylheptanoic acid ((2*R*,3*R*)-**2z**)

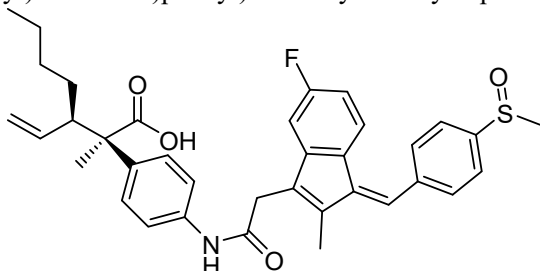

[Ir(cod)Cl]<sub>2</sub> (10.0 mg, 0.015 mmol, 0.05 equiv), ligand **L17** (0.030 mmol, 0.10 equiv), (AcO)<sub>4</sub>B<sub>2</sub>O (16.4 mg, 0.060 mmol, 0.2 equiv) and (*S*)-((2,3,5,6-tetrafluoro-4-methoxyphenyl)sulfonyl)-valine (**S**, 43.2 mg, 0.120 mmol, 0.4 equiv) were used.

Yield: 45%; <sup>1</sup>H NMR (500 MHz, CDCl<sub>3</sub>): δ = 0.76 (t, *J* = 6.9 Hz, 3H), 1.01-1.21 (m, 6H), 1.49 (s, 3H), 2.26 (s, 3H), 2.78-2.83 (m, 4H), 3.69 (s, 2H), 5.11-5.15 (m, 2H), 5.55 (ddd, *J* = 16.0, 6.9, 6.9 Hz, 1H), 6.57-6.62 (m, 1H), 6.92 (dd, *J* = 8.6, 2.3 Hz, 1H), 7.18-7.22 (m, 2H), 7.35-7.41 (m, 4H), 7.50 (s, 1H), 7.68 (d, *J* = 8.6 Hz, 2H), 7.74 (d, *J* = 8.0 Hz, 2H); <sup>13</sup>C NMR (125 MHz, CDCl<sub>3</sub>): δ = 10.6, 14.2, 17.0, 22.4, 28.2, 30.0, 34.5, 43.5, 50.2, 53.5, 106.0 (d, *J* = 23.9 Hz), 111.3 (d, *J* = 22.0 Hz), 118.5, 120.0, 124.0, 127.8, 128.9, 129.5, 129.5, 130.3, 132.1, 136.1, 137.5, 138.1, 139.1, 139.5, 141.4, 144.9, 146.2 (d, *J* = 7.7 Hz), 163.4 (d, *J* = 246.1 Hz), 167.9, 179.9; <sup>19</sup>F NMR (369 MHz, CDCl<sub>3</sub>): δ = -111.88; IR (neat): 2930, 2359, 1716, 1652, 1541, 1087, 757 cm<sup>-1</sup>; Enantiomeric excess was determined after hydrolysis of phenyl amide (2*R*,3*R*)-**2z**. HPLC (chiral column: CHIRALCEL OZ-H; solvent: hexane/2-propanol = 4/1; flow rate: 1.0 mL/min; detection: at 210 nm; rt): t<sub>R</sub> = 7.2 min. HRMS (ESI): m/z calcd for C<sub>36</sub>H<sub>38</sub>FNO<sub>4</sub>S [M+Na]<sup>+</sup> 622.2398. Found 622.2375; [α]<sub>D</sub><sup>20</sup> = 25.7 (*c* = 0.46, CHCl<sub>3</sub>).

## HPLC chart

### Racemate

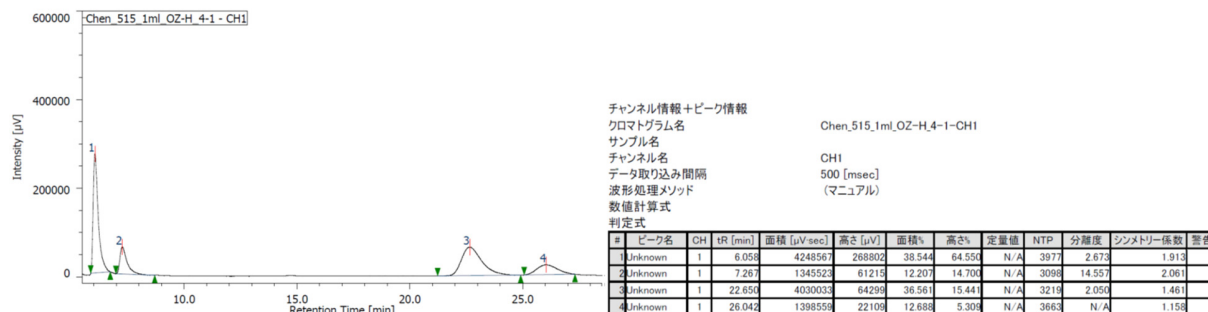

### (2*S*,3*R*)-**2z**

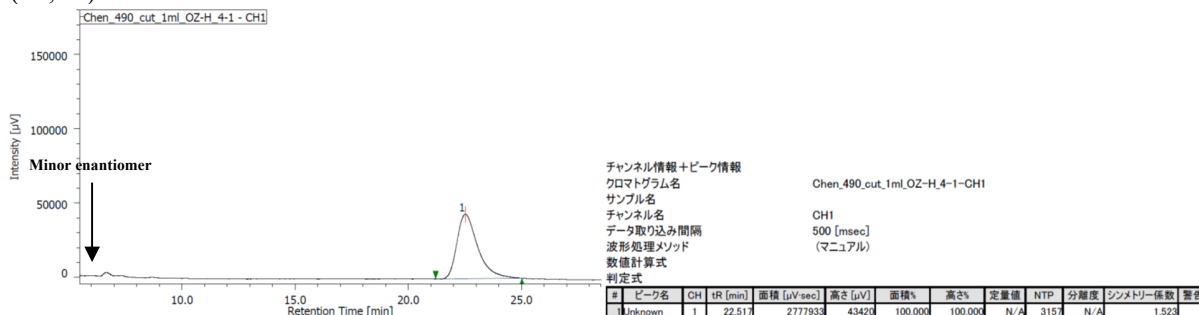

### (2*R*,3*R*)-**2z**



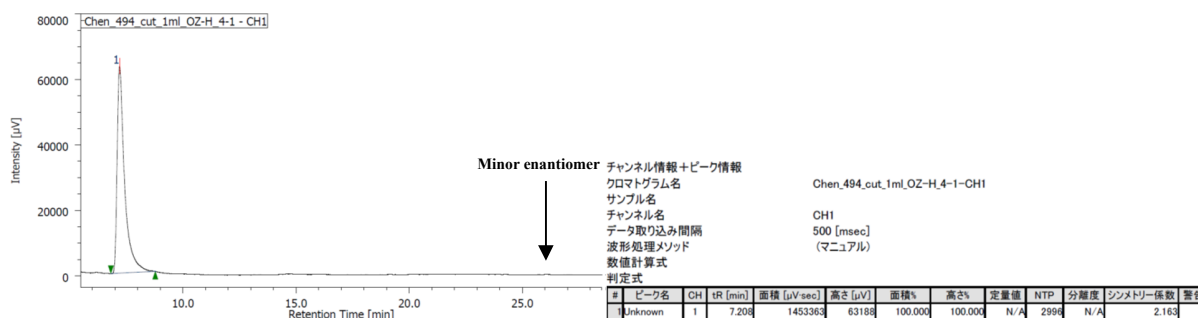

(2*S*,3*R*)-2-methyl-2-(4-((4-oxo-4-(((3*R*,5*aS*,6*R*,8*aS*,9*R*,10*S*,12*R*,12*aR*)-3,6,9-trimethyldecahydro-12*H*-3,12-epoxy[1,2]dioxepino[4,3-*i*]isochromen-10-yl)oxy)butanoyl)oxy)phenyl)-3-vinylheptanoic acid ((2*S*,3*R*)-**2aa**)

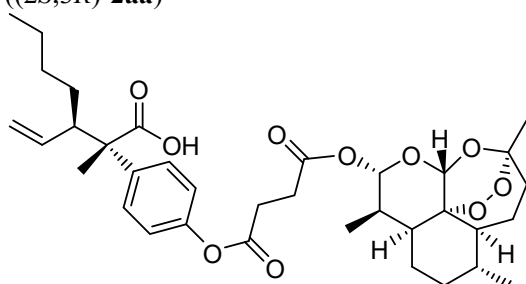

[Ir(cod)Cl]<sub>2</sub> (10.0 mg, 0.015 mmol, 0.05 equiv), ligand **L18** (0.030 mmol, 0.10 equiv), (AcO)<sub>4</sub>B<sub>2</sub>O (16.4 mg, 0.060 mmol, 0.2 equiv) and (*R*)-((2,3,5,6-tetrafluoro-4-methoxyphenyl)sulfonyl)-valine (**R**, 43.2 mg, 0.120 mmol, 0.4 equiv) were used.

Yield: 77%; <sup>1</sup>H NMR (400 MHz, CDCl<sub>3</sub>): δ = 0.83-0.88 (m, 6H), 0.95-1.05 (m, 4H), 1.15-1.52 (m, 16H), 1.59-1.65 (m, 1H), 1.69-1.80 (m, 2H), 1.87-1.92 (m, 1H), 2.00-2.06 (m, 1H), 2.37 (dt, *J* = 4.1, 14.2 Hz, 1H), 2.53-2.62 (m, 1H), 2.77-2.98 (m, 5H), 4.74 (dd, *J* = 18.3, 1.8 Hz, 1H), 4.88 (dd, *J* = 9.6, 1.8 Hz, 1H), 5.29 (ddd, *J* = 18.3, 9.6, 9.6 Hz, 1H), 5.45 (s, 1H), 5.81 (d, *J* = 10.1 Hz, 1H), 7.04 (d, *J* = 9.2 Hz, 2H), 7.40 (d, *J* = 8.7 Hz, 2H); <sup>13</sup>C NMR (100 MHz, CDCl<sub>3</sub>): δ = 12.1, 14.0, 17.0, 20.2, 22.0, 22.5, 24.6, 25.9, 29.1, 29.2, 30.3, 30.4, 31.8, 34.0, 36.2, 37.2, 45.2, 51.3, 51.5, 53.3, 80.1, 91.5, 92.3, 104.5, 118.2, 121.0, 127.9, 136.8, 139.1, 149.4, 170.6, 170.9, 180.6; IR (neat): 2926, 2357, 1748, 1507, 1095, 1013, 757 cm<sup>-1</sup>; Enantiomeric excess was determined after hydrolysis of phenyl ester (*2S*,3*R*)-**2aa**. HPLC (chiral column: CHIRALPAK IB N-5-IB N-5; solvent: hexane/2-propanol = 10/1; flow rate: 1.0 mL/min; detection: at 210 nm; rt): t<sub>R</sub> = 23.9 min. HRMS (ESI): *m/z* calcd for C<sub>35</sub>H<sub>48</sub>O<sub>10</sub> [M+Na]<sup>+</sup> 651.3140. Found 651.3131; [α]<sub>D</sub><sup>20</sup> = 29.2 (*c* = 0.76, CHCl<sub>3</sub>).

(2*R*,3*R*)-2-methyl-2-(4-((4-oxo-4-(((3*R*,5*aS*,6*R*,8*aS*,9*R*,10*S*,12*R*,12*aR*)-3,6,9-trimethyldecahydro-12*H*-3,12-epoxy[1,2]dioxepino[4,3-*i*]isochromen-10-yl)oxy)butanoyl)oxy)phenyl)-3-vinylheptanoic acid ((2*R*,3*R*)-**2aa**)

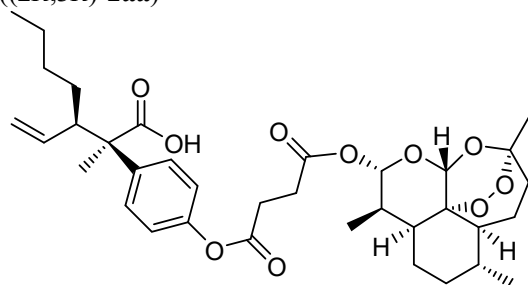

[Ir(cod)Cl]<sub>2</sub> (10.0 mg, 0.015 mmol, 0.05 equiv), ligand **L17** (0.030 mmol, 0.10 equiv), (AcO)<sub>4</sub>B<sub>2</sub>O (16.4 mg, 0.060 mmol, 0.2 equiv) and (*S*)-((2,3,5,6-tetrafluoro-4-methoxyphenyl)sulfonyl)-valine (**S**, 43.2 mg, 0.120 mmol, 0.4 equiv) were used.

Yield: 73%; <sup>1</sup>H NMR (500 MHz, CDCl<sub>3</sub>): δ = 0.77 (t, *J* = 7.2 Hz, 3H), 0.85 (d, *J* = 6.9 Hz, 3H), 0.92-1.11 (m, 8H), 1.18-1.51 (m, 12H), 1.62 (dt, *J* = 13.7, 4.6 Hz, 1H), 1.69-1.80 (m, 2H), 1.86-1.92 (m, 1H), 2.01-2.05 (m, 1H), 2.38 (dt, *J* = 3.4, 13.7 Hz, 1H), 2.54-2.61 (m, 1H), 2.77-2.98 (m, 5H), 5.12-5.16 (m, 2H), 5.45 (s, 1H), 5.55 (ddd, *J* = 16.6, 8.3, 8.3 Hz, 1H), 5.82 (d, *J* = 9.7 Hz, 1H), 7.07 (d, *J* = 9.2 Hz, 2H), 7.45 (d, *J* = 8.6 Hz, 2H); <sup>13</sup>C NMR (125 MHz, CDCl<sub>3</sub>): δ = 12.1, 14.0, 17.3, 20.2, 22.0, 22.4, 24.6, 25.9, 28.2, 29.1, 29.2, 30.0, 31.8, 34.1, 36.2, 37.2, 45.2, 50.5, 51.5, 53.6, 80.1, 91.5, 92.3, 104.5, 118.6, 121.0, 128.4, 137.9, 138.4, 149.5, 170.6, 171.0, 180.4; IR (neat): 2928, 2359, 1749, 1507, 1135, 1016, 757 cm<sup>-1</sup>; Enantiomeric excess was determined after hydrolysis of phenyl ester (*2R,3R*)-**2aa**. HPLC (chiral column: CHIRALPAK IB N-5-IB N-5; solvent: hexane/2-propanol = 10/1; flow rate: 1.0 mL/min; detection: at 210 nm; rt): *t*<sub>R</sub> = 18.3 min. HRMS (ESI): *m/z* calcd for C<sub>35</sub>H<sub>48</sub>O<sub>10</sub> [M+Na]<sup>+</sup> 651.3140. Found 651.3165; [α]<sub>D</sub><sup>20</sup> = 21.1 (*c* = 0.97, CHCl<sub>3</sub>).

## HPLC chart Racemate

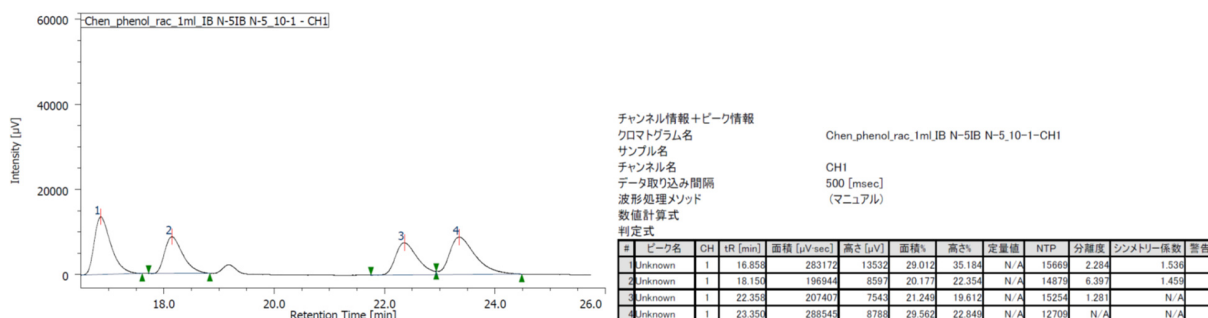

## (*2S,3R*)-**2aa**

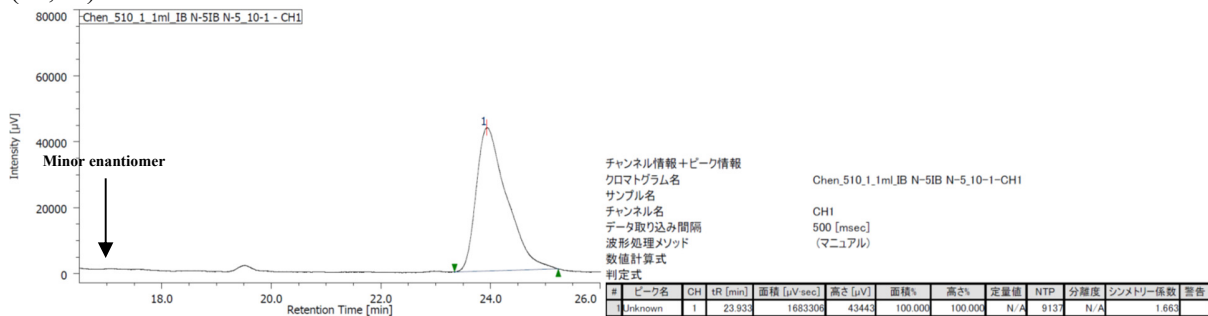

## (*2R,3R*)-**2aa**

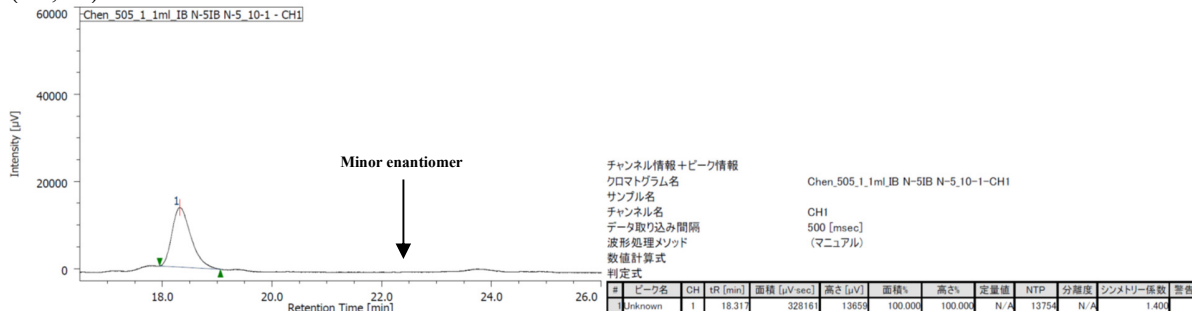

(2*S*,3*R*)-2-(4-(((4-(((3*S*,8*S*,9*S*,10*R*,13*R*,14*S*,17*R*)-10,13-dimethyl-17-((*R*)-6-methylheptan-2-yl)-2,3,4,7,8,9,10,11,12,13,14,15,16,17-tetradecahydro-1*H*-cyclopenta[*a*]phenanthren-3-yl)oxy)-4-oxobutanoyl)oxy)phenyl)-2-methyl-3-vinylheptanoic acid ((2*S*,3*R*)-**2ab**)

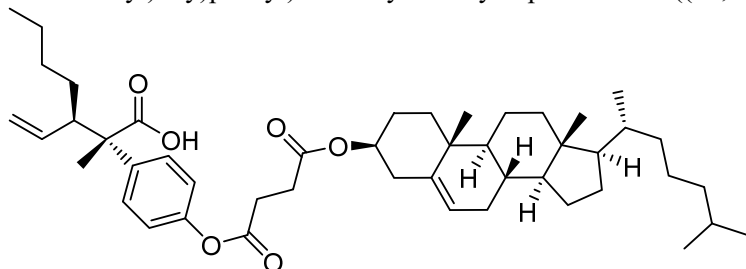

Yield: 67%; <sup>1</sup>H NMR (500 MHz, CDCl<sub>3</sub>): δ = 0.68 (s, 3H), 0.86-1.60 (m, 45H), 1.80-1.87 (m, 3H), 1.95-2.02 (m, 2H), 2.33 (d, *J* = 6.9 Hz, 2H), 2.70 (t, *J* = 6.6 Hz, 2H), 2.84-2.87 (m, 3H), 4.62-4.68 (m, 1H), 4.75 (m, 1H), 4.89 (dd, *J* = 8.6, 1.7 Hz, 1H), 5.29 (ddd, *J* = 16.6, 8.6, 8.6 Hz, 1H), 5.37 (d, *J* = 4.6 Hz, 1H), 7.04 (d, *J* = 8.9 Hz, 2H), 7.41 (d, *J* = 8.9 Hz, 2H); <sup>13</sup>C NMR (125 MHz, CDCl<sub>3</sub>): δ = 11.8, 14.0, 17.0, 18.7, 19.3, 21.0, 22.5, 22.5, 22.8, 23.8, 24.3, 27.7, 28.0, 28.2, 29.4, 30.3, 30.4, 31.8, 31.9, 35.8, 36.2, 36.5, 36.9, 38.0, 39.5, 39.7, 42.3, 50.0, 51.3, 53.4, 56.1, 56.7, 74.5, 118.2, 120.9, 122.7, 127.9, 136.8, 139.1, 139.5, 149.5, 170.9, 171.5, 181.0; IR (neat): 2935, 2868, 1734, 1507, 1209, 1173, 1138, 1017, 738 cm<sup>-1</sup>; Enantiomeric excess was determined after hydrolysis of phenyl ester (2*S*,3*R*)-**2z**. HPLC (chiral column: CHIRALPAK IB N-5-IB N-5; solvent: hexane/2-propanol = 10/1; flow rate: 1.0 mL/min; detection: at 210 nm; rt): *t*<sub>R</sub> = 23.4 min. HRMS (ESI): *m/z* calcd for C<sub>47</sub>H<sub>70</sub>O<sub>6</sub> [M+Na]<sup>+</sup> 753.5065. Found 753.5053; [α]<sub>D</sub><sup>20</sup> = 2.2 (*c* = 0.95, CHCl<sub>3</sub>).

(2*R*,3*R*)-2-(4-(((4-(((3*S*,8*S*,9*S*,10*R*,13*R*,14*S*,17*R*)-10,13-dimethyl-17-((*R*)-6-methylheptan-2-yl)-2,3,4,7,8,9,10,11,12,13,14,15,16,17-tetradecahydro-1*H*-cyclopenta[*a*]phenanthren-3-yl)oxy)-4-oxobutanoyl)oxy)phenyl)-2-methyl-3-vinylheptanoic acid ((2*R*,3*R*)-**2ab**)

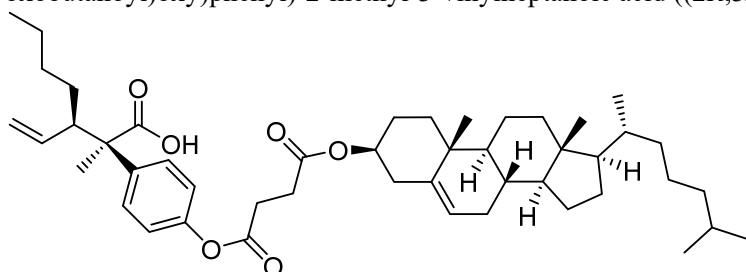

Yield: 76%; <sup>1</sup>H NMR (400 MHz, CDCl<sub>3</sub>): δ = 0.68 (s, 3H), 0.77 (t, *J* = 6.9 Hz, 3H), 0.86 (d, *J* = 1.8 Hz, 3H), 0.87 (d, *J* = 1.4 Hz, 3H), 0.91 (d, *J* = 6.4 Hz, 3H), 0.94-1.68 (m, 33H), 1.79-1.87 (m, 3H), 1.93-2.04 (m, 2H), 2.33 (d, *J* = 7.3 Hz, 2H), 2.71 (t, *J* = 6.6 Hz, 2H), 2.85-2.92 (m, 3H), 4.62-4.69 (m, 1H), 5.12-5.16 (m, 2H), 5.37 (d, *J* = 4.6 Hz, 1H), 5.55 (ddd, *J* = 19.7, 9.2, 9.2 Hz, 1H), 7.06 (d, *J* = 8.9 Hz, 2H), 7.46 (d, *J* = 8.9 Hz, 2H); <sup>13</sup>C NMR (100 MHz, CDCl<sub>3</sub>): δ = 11.8, 14.0, 17.2, 18.7, 19.3, 21.0, 22.4, 22.5, 22.8, 23.8, 24.3, 27.7, 28.0, 28.2, 29.4, 29.4, 30.0, 31.8, 31.9, 35.8, 36.1, 36.5, 36.9, 38.0, 39.5, 39.7, 42.3, 50.0, 50.5, 53.6, 56.1, 56.6, 74.5, 118.7, 121.0, 122.7, 128.4, 137.9, 138.3, 139.5, 149.5, 170.9, 171.5, 181.0; IR (neat): 2951, 2868, 1732, 1508, 1267, 1210, 1138, 1017, 739 cm<sup>-1</sup>; Enantiomeric excess was determined after hydrolysis of phenyl ester (2*R*,3*R*)-**2ab**. HPLC (chiral column: CHIRALPAK IB N-5-IB N-5; solvent: hexane/2-propanol = 10/1; flow rate: 1.0 mL/min; detection: at 210 nm; rt): *t*<sub>R</sub> = 18.3 min. HRMS (ESI): *m/z* calcd for C<sub>47</sub>H<sub>70</sub>O<sub>6</sub> [M+Na]<sup>+</sup> 753.5065. Found 753.5070; [α]<sub>D</sub><sup>20</sup> = 0.71 (*c* = 1.8, CHCl<sub>3</sub>).

HPLC chart  
Racemate

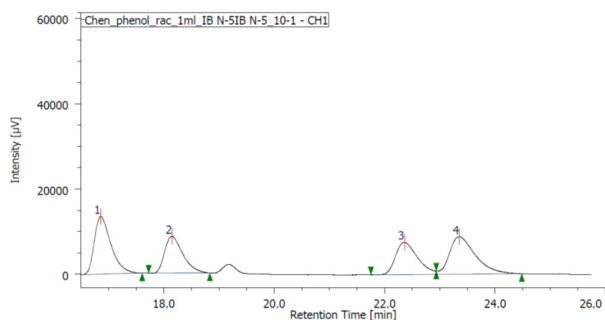

チャンネル情報+ピーク情報

クロマトグラム名  
サンプル名  
チャンネル名  
データ取り込み間隔  
波形処理メソッド  
数値計算式  
判定式

Chen\_phenol\_rac\_1ml\_IB N-5IB N-5\_10-1-CH1  
CH1  
500 [msec]  
(マニュアル)

| # | ピーク名    | CH | tR [min] | 面積 [μV·sec] | 高さ [μV] | 面積%    | 高さ%    | 定量値 | NTP   | 分離度   | シメトリ係数 | 警告 |
|---|---------|----|----------|-------------|---------|--------|--------|-----|-------|-------|--------|----|
| 1 | Unknown | 1  | 16.856   | 283172      | 13532   | 29.012 | 35.184 | N/A | 15669 | 2.284 | 1.536  |    |
| 2 | Unknown | 1  | 18.150   | 196944      | 8597    | 20.177 | 22.354 | N/A | 14879 | 6.397 | 1.459  |    |
| 3 | Unknown | 1  | 22.356   | 207407      | 7543    | 21.249 | 19.612 | N/A | 15254 | 1.281 | N/A    |    |
| 4 | Unknown | 1  | 23.350   | 288545      | 8788    | 29.562 | 22.849 | N/A | 12709 | N/A   | N/A    |    |

## (2*S*,3*R*)-2ab

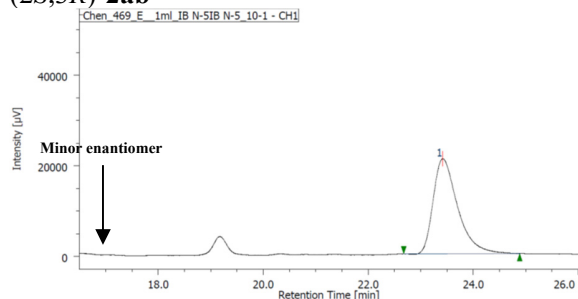

チャンネル情報+ピーク情報

クロマトグラム名  
サンプル名  
チャンネル名  
データ取り込み間隔  
波形処理メソッド  
数値計算式  
判定式

Chen\_469\_E\_1ml\_IB N-5IB N-5\_10-1-CH1  
CH1  
500 [msec]  
(マニュアル)

| # | ピーク名    | CH | tR [min] | 面積 [μV·sec] | 高さ [μV] | 面積%     | 高さ%     | 定量値 | NTP   | 分離度 | シメトリ係数 | 警告 |
|---|---------|----|----------|-------------|---------|---------|---------|-----|-------|-----|--------|----|
| 1 | Unknown | 1  | 23.417   | 679218      | 20970   | 100.000 | 100.000 | N/A | 13148 | N/A | 1.541  |    |

## (2*R*,3*R*)-2ab

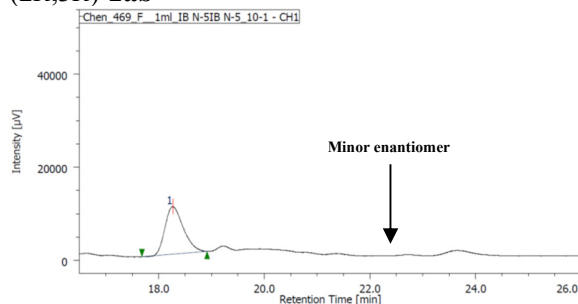

チャンネル情報+ピーク情報

クロマトグラム名  
サンプル名  
チャンネル名  
データ取り込み間隔  
波形処理メソッド  
数値計算式  
判定式

Chen\_469\_F\_1ml\_IB N-5IB N-5\_10-1-CH1  
CH1  
500 [msec]  
(マニュアル)

| # | ピーク名    | CH | tR [min] | 面積 [μV·sec] | 高さ [μV] | 面積%     | 高さ%     | 定量値 | NTP   | 分離度 | シメトリ係数 | 警告 |
|---|---------|----|----------|-------------|---------|---------|---------|-----|-------|-----|--------|----|
| 1 | Unknown | 1  | 18.267   | 247754      | 10226   | 100.000 | 100.000 | N/A | 13111 | N/A | 1.323  |    |

(2*S*,3*R*)-2-(4-(((2*R*,3*R*,4*R*,5*R*)-3,4-bis(benzyloxy)-5-(4-(dibenzylamino)-2-oxopyrimidin-1(2*H*)-yl)tetrahydrofuran-2-yl)methoxy)-4-oxobutanoyl)oxy)phenyl)-2-methyl-3-vinylheptanoic acid ((2*S*,3*R*)-2ac)

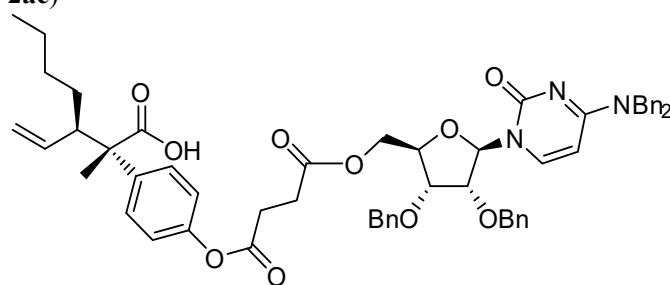

[Ir(cod)Cl]<sub>2</sub> (10.0 mg, 0.015 mmol, 0.05 equiv), ligand **L18** (0.030 mmol, 0.10 equiv), (AcO)<sub>4</sub>B<sub>2</sub>O (16.4 mg, 0.060 mmol, 0.2 equiv) and (*R*)-((2,3,5,6-tetrafluoro-4-methoxyphenyl)sulfonyl)-valine (**R**, 43.2 mg, 0.120 mmol, 0.4 equiv) were used.

NMR yield: 53%; Product was isolated after methyl esterification.

## Procedure of methylation

A solution of crude (2*S*,3*R*)-2ac in MeOH (1.0 mL) and toluene (1.0 mL) was treated with TMSCHN<sub>2</sub> (2.0 M in Et<sub>2</sub>O, 0.45 mL, 0.9 mmol), which resulted in a solution color change to yellow. After stirring

for 30 min at room temperature, a few drops of acetic acid were added until the color of the solution disappeared. The reaction mixture was concentrated under reduced pressure and the remaining residue was purified by column chromatography on silica gel (EtOAc/hexane = 1/1), affording the pure (2*S*,3*R*)-**2ae**.

((2*R*,3*R*,4*R*,5*R*)-3,4-bis(benzyloxy)-5-(4-(dibenzylamino)-2-oxypyrimidin-1(2*H*)-yl)tetrahydrofuran-2-yl)methyl (4-((2*S*,3*R*)-1-methoxy-2-methyl-1-oxo-3-vinylheptan-2-yl)phenyl) succinate ((2*S*,3*R*)-**2ae**)

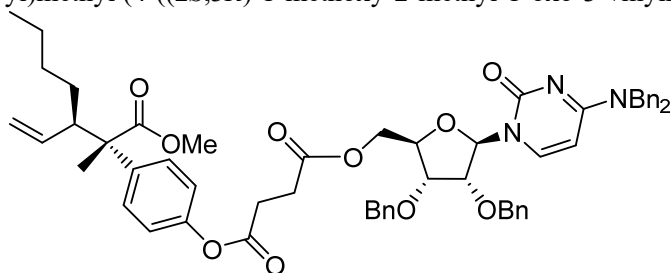

Yield: 49%; <sup>1</sup>H NMR (400 MHz, CDCl<sub>3</sub>): δ = 0.83 (t, *J* = 6.6 Hz, 3H), 1.14-1.29 (m, 6H), 1.44 (s, 3H), 2.42-2.56 (m, 2H), 2.72-2.81 (m, 3H), 3.60 (s, 3H), 3.70-3.74 (m, 1H), 4.13 (d, *J* = 11.4 Hz, 1H), 4.25 (d, *J* = 4.6 Hz, 1H), 4.33-4.46 (m, 5H), 4.65 (dd, *J* = 18.8, 1.8 Hz, 1H), 4.80 (dd, *J* = 10.5, 1.8 Hz, 1H), 4.90-4.95 (m, 3H), 5.08-5.12 (m, 1H), 5.22 (ddd, *J* = 18.8, 10.5, 9.2 Hz, 1H), 5.74 (d, *J* = 8.2 Hz, 1H), 5.91 (s, 1H), 6.89-6.91 (m, 2H), 7.06-7.08 (m, 2H), 7.16-7.18 (m, 2H), 7.22-7.31 (m, 17H), 7.49 (d, *J* = 6.9 Hz, 2H), 7.65 (d, *J* = 8.2 Hz, 1H); <sup>13</sup>C NMR (125 MHz, CDCl<sub>3</sub>): δ = 14.0, 17.2, 22.5, 28.7, 29.0, 30.3, 30.5, 50.5, 50.7, 51.5, 51.6, 52.1, 53.5, 62.7, 71.5, 72.0, 73.9, 74.6, 79.2, 90.9, 91.5, 118.0, 120.7, 126.3, 127.5, 127.7, 127.8, 127.8, 127.9, 128.4, 128.5, 128.6, 128.8, 129.0, 135.7, 136.6, 137.0, 137.2, 137.8, 140.0, 140.9, 149.0, 154.8, 163.9, 170.7, 171.5, 175.6; IR (neat): 2929, 1746, 1652, 1520, 1362, 1139, 981, 699 cm<sup>-1</sup>; Enantiomeric excess was determined after hydrolysis of methyl ester and phenyl ester of (2*S*,3*R*)-**2ae**. HPLC (chiral column: CHIRALPAK IB N-5-IB N-5; solvent: hexane/2-propanol = 10/1; flow rate: 1.0 mL/min; detection: at 210 nm; rt): *t*<sub>R</sub> = 23.5 min. HRMS (ESI): *m/z* calcd for C<sub>58</sub>H<sub>63</sub>N<sub>3</sub>O<sub>10</sub> [M+Na]<sup>+</sup> 984.4406. Found 984.4391; [α]<sub>D</sub><sup>20</sup> = 120.5 (*c* = 0.70, CHCl<sub>3</sub>).

(2*R*,3*R*)-2-(4-(((2*R*,3*R*,4*R*,5*R*)-3,4-bis(benzyloxy)-5-(4-(dibenzylamino)-2-oxypyrimidin-1(2*H*)-yl)tetrahydrofuran-2-yl)methoxy)-4-oxobutanoyl)oxy)phenyl)-2-methyl-3-vinylheptanoic acid ((2*R*,3*R*)-**2ac**)

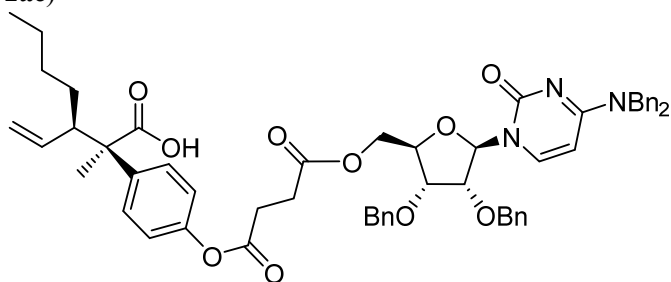

[Ir(cod)Cl]<sub>2</sub> (10.0 mg, 0.015 mmol, 0.05 equiv), ligand **L17** (0.030 mmol, 0.10 equiv), (AcO)<sub>4</sub>B<sub>2</sub>O (16.4 mg, 0.060 mmol, 0.2 equiv) and (*S*)-((2,3,5,6-tetrafluoro-4-methoxyphenyl)sulfonyl)-valine (**S**, 43.2 mg, 0.120 mmol, 0.4 equiv) were used.

NMR yield: 40%; Product was isolated after methyl esterification.

((2*R*,3*R*,4*R*,5*R*)-3,4-bis(benzyloxy)-5-(4-(dibenzylamino)-2-oxypyrimidin-1(2*H*)-yl)tetrahydrofuran-2-yl)methyl (4-((2*R*,3*R*)-1-methoxy-2-methyl-1-oxo-3-vinylheptan-2-yl)phenyl) succinate ((2*R*,3*R*)-**2ae**)

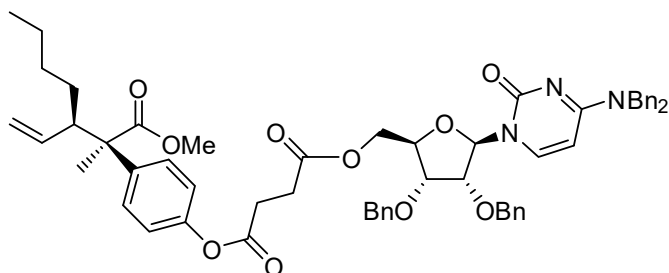

Yield: 34%;  $^1\text{H}$  NMR (500 MHz,  $\text{CDCl}_3$ ):  $\delta$  = 0.76 (t,  $J$  = 6.6 Hz, 3H), 1.02-1.35 (m, 6H), 1.52 (s, 3H), 2.50-2.61 (m, 2H), 2.79 (t,  $J$  = 6.6 Hz, 2H), 2.88-2.91 (m, 1H), 3.56 (s, 3H), 3.75-3.78 (m, 1H), 4.19 (d,  $J$  = 12.0 Hz, 1H), 4.28 (d,  $J$  = 4.6 Hz, 1H), 4.39-4.49 (m, 5H), 4.94-5.02 (m, 3H), 5.08-5.12 (m, 3H), 5.55 (ddd,  $J$  = 16.6, 9.2, 9.2 Hz, 1H), 5.77 (d,  $J$  = 8.0 Hz, 1H), 5.95 (s, 1H), 6.98 (d,  $J$  = 8.6 Hz, 2H), 7.11 (br, 1H), 7.20-7.38 (m, 19H), 7.52 (d,  $J$  = 7.4 Hz, 3H), 7.66 (d,  $J$  = 8.0 Hz, 1H);  $^{13}\text{C}$  NMR (125 MHz,  $\text{CDCl}_3$ ):  $\delta$  = 13.9, 14.0, 17.5, 22.4, 25.3, 28.2, 28.7, 29.0, 29.9, 50.7, 51.9, 53.8, 62.9, 64.4, 65.6, 71.5, 72.0, 74.8, 79.1, 91.0, 91.4, 118.2, 120.8, 121.4, 126.3, 127.6, 127.8, 127.8, 127.9, 128.2, 128.3, 128.4, 128.5, 128.6, 128.8, 129.0, 137.2, 137.9, 138.4, 139.3, 140.7, 149.2, 155.3, 164.3, 170.7, 171.5, 175.4; IR (neat): 2924, 1735, 1653, 1496, 1453, 1094, 839, 698  $\text{cm}^{-1}$ ; Enantiomeric excess was determined after hydrolysis of methyl ester and phenyl ester of (2*R*,3*R*)-**2ae**. HPLC (chiral column: CHIRALPAK IB N-5-IB N-5; solvent: hexane/2-propanol = 10/1; flow rate: 1.0 mL/min; detection: at 210 nm; rt):  $t_R$  = 18.4 min. HRMS (ESI):  $m/z$  calcd for  $\text{C}_{58}\text{H}_{63}\text{N}_3\text{O}_{10}$  [ $\text{M}+\text{Na}$ ] $^+$  984.4406. Found 984.4391;

## HPLC chart

### Racemate

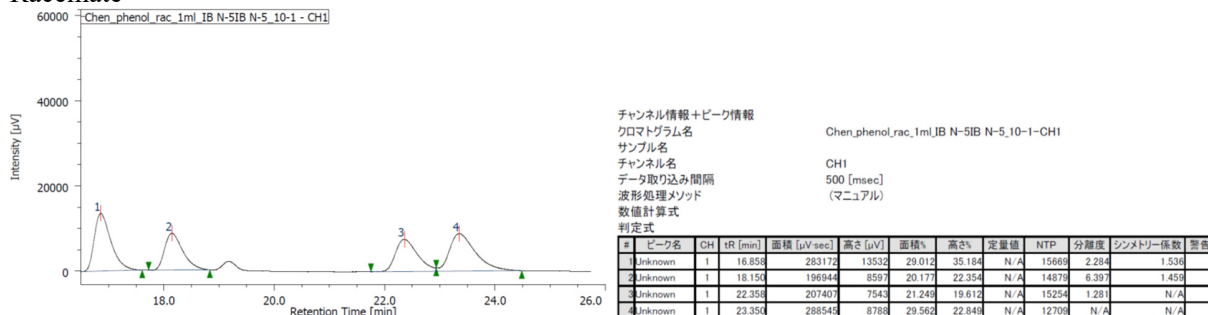

### (2*S*,3*R*)-**2ac**

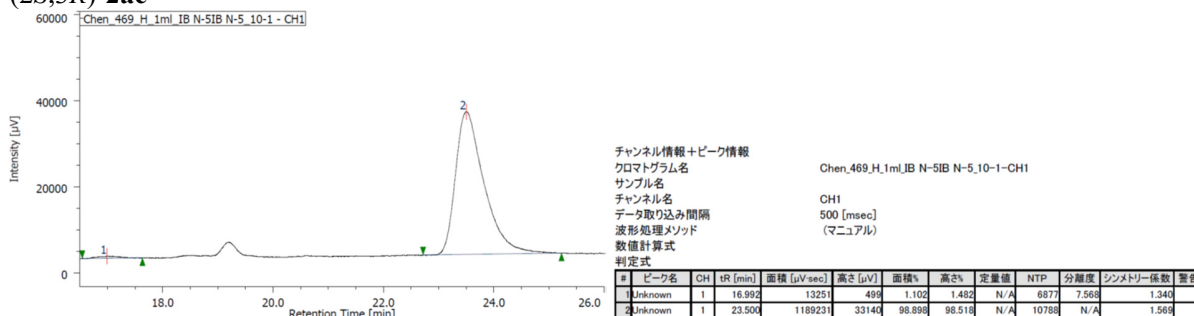

### (2*R*,3*R*)-**2ac**

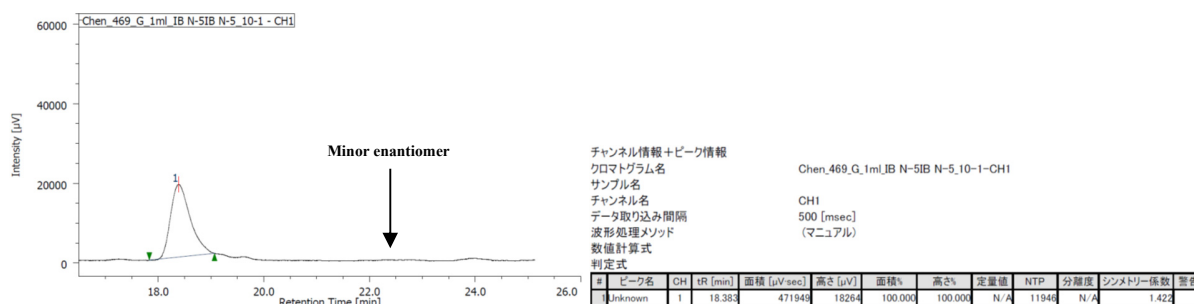

(2*S*,3*R*)-2-(4-(((2*E*,4*E*,6*E*,8*E*)-3,7-dimethyl-9-(2,6,6-trimethylcyclohex-1-en-1-yl)nona-2,4,6,8-tetraenoyl)oxy)phenyl)-2-methyl-3-vinylheptanoic acid ((2*S*,3*R*)-**2ad**)

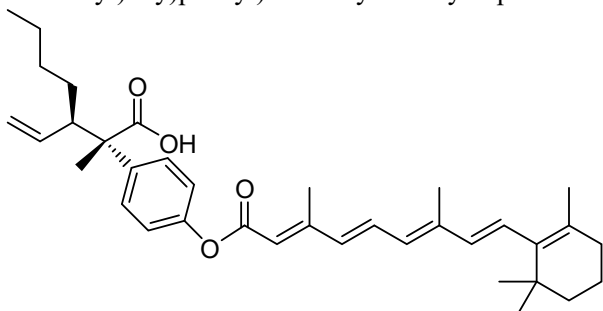

[Ir(cod)Cl]<sub>2</sub> (10.0 mg, 0.015 mmol, 0.05 equiv), ligand **L18** (0.030 mmol, 0.10 equiv), (AcO)<sub>4</sub>B<sub>2</sub>O (16.4 mg, 0.060 mmol, 0.2 equiv) and (*R*)-((2,3,5,6-tetrafluoro-4-methoxyphenyl)sulfonyl)-valine (**R**, 43.2 mg, 0.120 mmol, 0.4 equiv) were used.

Yield: 72%; <sup>1</sup>H NMR (400 MHz, CDCl<sub>3</sub>): δ = 0.88 (t, *J* = 6.9 Hz, 3H), 1.02-1.04 (m, 6H), 1.22-1.49 (m, 8H), 1.54 (s, 3H), 1.59-1.64 (m, 2H), 1.70-1.73 (m, 3H), 2.01-2.05 (m, 5H), 2.40 (s, 3H), 2.86-2.90 (m, 1H), 4.77 (dd, *J* = 18.8, 1.6 Hz, 1H), 4.90 (dd, *J* = 10.7, 1.6 Hz, 1H), 5.32 (ddd, *J* = 18.8, 10.7, 9.6 Hz, 1H), 5.97 (s, 1H), 6.11-6.23 (m, 2H), 6.26-6.39 (m, 2H), 7.05-7.11 (m, 3H), 7.43 (d, *J* = 8.7 Hz, 2H); <sup>13</sup>C NMR (100 MHz, CDCl<sub>3</sub>): δ = 12.9, 14.0, 14.1, 17.0, 19.2, 21.8, 22.6, 29.0, 30.3, 30.4, 33.1, 34.2, 39.6, 51.2, 53.4, 117.2, 118.1, 121.3, 127.8, 129.1, 129.4, 130.2, 131.9, 134.8, 136.9, 137.2, 137.6, 138.7, 140.3, 149.6, 155.5, 165.3, 181.0; IR (neat): 2930, 2359, 1717, 1507, 1213, 1124, 752 cm<sup>-1</sup>; Enantiomeric excess was determined after hydrolysis of phenyl ester (2*S*,3*R*)-**2ad**. HPLC (chiral column: CHIRALPAK IB N-5-IB N-5; solvent: hexane/2-propanol = 10/1; flow rate: 1.0 mL/min; detection: at 210 nm; rt): *t*<sub>R</sub> = 24.4 min. HRMS (ESI): *m/z* calcd for C<sub>36</sub>H<sub>48</sub>O<sub>4</sub> [M+Na]<sup>+</sup> 567.3445. Found 567.3452; [α]<sub>D</sub><sup>20</sup> = 26.0 (*c* = 1.02, CHCl<sub>3</sub>).

(2*R*,3*R*)-2-(4-(((2*E*,4*E*,6*E*,8*E*)-3,7-dimethyl-9-(2,6,6-trimethylcyclohex-1-en-1-yl)nona-2,4,6,8-tetraenoyl)oxy)phenyl)-2-methyl-3-vinylheptanoic acid ((2*R*,3*R*)-**2ad**)

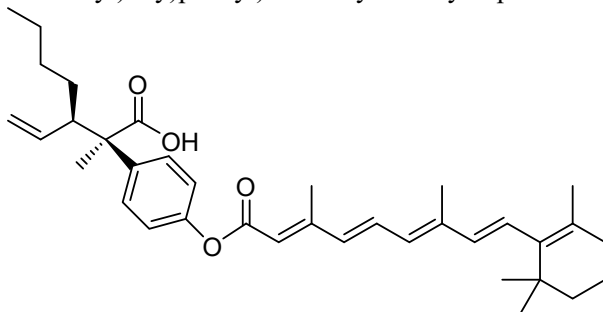

[Ir(cod)Cl]<sub>2</sub> (10.0 mg, 0.015 mmol, 0.05 equiv), ligand **L17** (0.030 mmol, 0.10 equiv), (AcO)<sub>4</sub>B<sub>2</sub>O (16.4 mg, 0.060 mmol, 0.2 equiv) and (*S*)-((2,3,5,6-tetrafluoro-4-methoxyphenyl)sulfonyl)-valine (**S**, 43.2 mg, 0.120 mmol, 0.4 equiv) were used.

Yield: 67%; <sup>1</sup>H NMR (500 MHz, CDCl<sub>3</sub>): δ = 0.79 (t, *J* = 6.9 Hz, 3H), 1.03-1.27 (m, 12H), 1.47-1.49 (m, 2H), 1.53 (s, 3H), 1.60-1.65 (m, 2H), 1.73 (s, 3H), 2.01-2.05 (m, 5H), 2.41 (s, 3H), 2.90-2.94 (m, 1H), 5.13-5.17 (m, 2H), 5.57 (ddd, *J* = 19.5, 8.9, 8.9 Hz, 1H), 5.99 (s, 1H), 6.15-6.20 (m, 2H), 6.30-6.39 (m, 2H), 7.06-7.11 (m, 3H), 7.48 (d, *J* = 8.6 Hz, 2H); <sup>13</sup>C NMR (125 MHz, CDCl<sub>3</sub>): δ = 12.9, 14.0, 14.1, 17.3, 19.2, 21.7, 22.4, 28.2, 28.9, 30.0, 33.1, 34.2, 39.6, 50.4, 53.6, 117.2, 118.6, 121.3, 128.3, 129.1, 129.4, 130.2, 132.0, 134.7, 137.2, 137.6, 137.9, 138.0, 140.4, 149.7, 155.6, 165.4, 181.1; IR (neat): 2930, 2359, 1717, 1507, 1218, 1122, 757 cm<sup>-1</sup>; Enantiomeric excess was determined after hydrolysis of phenyl ester (**2R,3R**)-**2ad**. HPLC (chiral column: CHIRALPAK IB N-5-IB N-5; solvent: hexane/2-propanol = 10/1; flow rate: 1.0 mL/min; detection: at 210 nm; rt): *t*<sub>R</sub> = 18.6 min. HRMS (ESI): *m/z* calcd for C<sub>36</sub>H<sub>48</sub>O<sub>4</sub> [M+Na]<sup>+</sup> 567.3445. Found 567.3454 [α]<sub>D</sub><sup>20</sup> = 24.6 (*c* = 1.56, CHCl<sub>3</sub>).

## HPLC chart

### Racemate

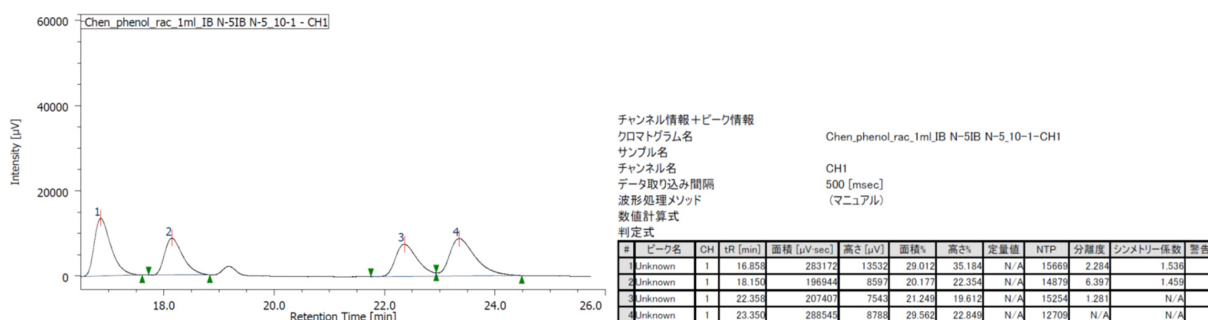

### (2*S*,3*R*)-**2ad**

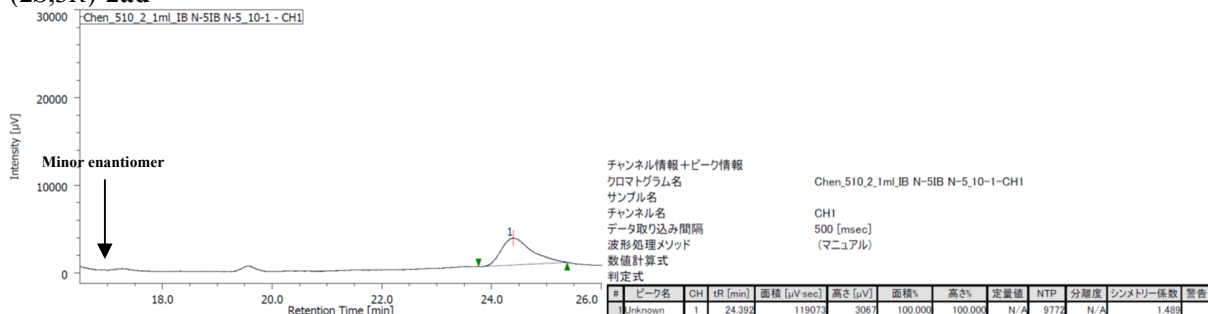

### (2*R*,3*R*)-**2ad**

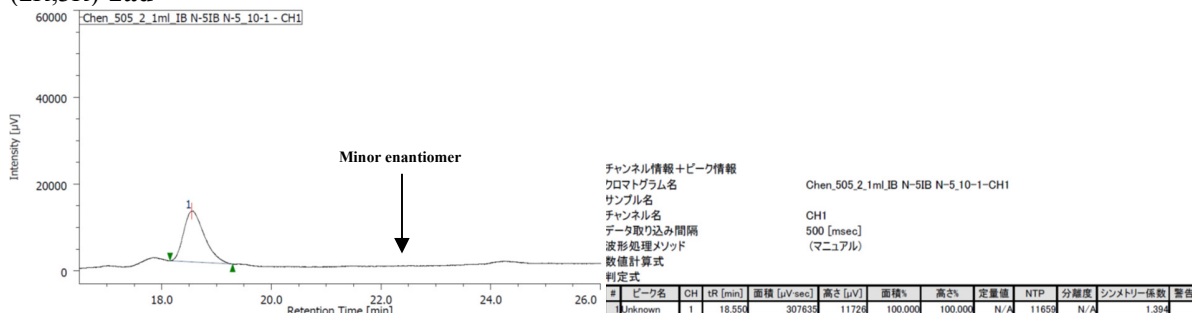



#### 4. Procedure for Phosphoramidite Ligand Synthesis

**L1** and **L3** were purchased from Aldrich. **L2**, **L4**, **L13** and **L15** were prepared according to the reported methods.<sup>2-5</sup>

(11*bS*)-*N,N*-bis((*S*)-1-(2-methoxyphenyl)ethyl)-8,9,10,11,12,13,14,15-octahydrodinaphtho[2,1-*d*:1',2'-*f*][1,3,2]dioxaphosphepin-4-amine (**L4**)

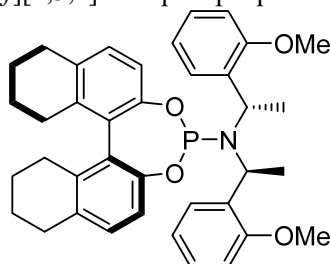

Yield: 30%; <sup>1</sup>H NMR (400 MHz, CDCl<sub>3</sub>): δ = 1.40 (d, *J* = 7.3 Hz, 6H), 1.72-1.79 (m, 8H), 2.21-2.27 (m, 2H), 2.59-2.82 (m, 6H), 3.62 (s, 6H), 4.78-4.86 (m, 2H), 6.48 (d, *J* = 7.8 Hz, 2H), 6.71-6.79 (m, 4H), 6.99-7.10 (m, 4H), 7.50-7.52 (m, 2H); <sup>13</sup>C NMR (100 MHz, CDCl<sub>3</sub>): δ = 21.9, 22.1, 22.6, 22.7, 22.8, 27.7, 27.9, 29.0, 29.2, 50.7 (d, *J* = 13.4 Hz), 54.7, 109.1, 118.8, 119.1, 119.5, 127.2, 127.6, 127.7, 128.6, 129.3, 129.6, 132.0, 132.8, 133.8, 137.2, 138.0, 149.1, 149.6 (d, *J* = 8.6 Hz), 156.1; <sup>31</sup>P NMR (159 MHz, CDCl<sub>3</sub>): δ = 152.0; IR (neat): 2933, 1600, 1466, 1239, 1096, 938, 833, 751 cm<sup>-1</sup>; HRMS (ESI): *m/z* calcd for C<sub>38</sub>H<sub>42</sub>NO<sub>4</sub>P [M+Na]<sup>+</sup> 630.2749. Found 630.2750; [α]<sub>D</sub><sup>20</sup> = 78.7 (*c* = 0.86, CHCl<sub>3</sub>).

#### Preparation of **L5-12**, **14**, **16**

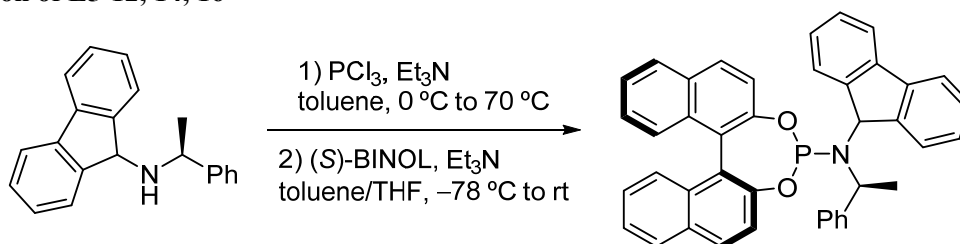

A flame-dried 250 mL flask, equipped with a magnetic stirring bar, was charged with toluene (50 mL) and PCl<sub>3</sub> (0.67 mL, 7.7 mmol, 1.1 equiv), and then the solution was cooled to 0 °C. Another flame-dried, 25 mL flask was charged with secondary amine (7.7 mmol, 1.1 equiv), toluene (8.0 mL), and Et<sub>3</sub>N (1.8 mL, 12.9 mmol, 1.84 equiv). This mixture was added dropwise to the above mentioned PCl<sub>3</sub> solution at 0 °C. After the addition was complete, the reaction mixture was heated at 70 °C for 6 h, and then was cooled to -78 °C. To this flask at -78 °C, a solution of (*S*)-BINOL (2.0 g, 7.0 mmol, 1 equiv) and Et<sub>3</sub>N (3.5 mL, 25.2 mmol, 3.6 equiv) in toluene (30 mL) and THF (6.0 mL) was added slowly. The resulting mixture was stirred at room temperature for overnight, then filtered through celite, and the residue was washed with Et<sub>2</sub>O. The filtrate was concentrated in vacuo. The product was purified by column chromatography (hexane/EtOAc = 15/1). The solvent was evaporated in vacuo to afford the pure ligand.

(11*bS*)-*N*-(9*H*-fluoren-9-yl)-*N*-((*S*)-1-phenylethyl)dinaphtho[2,1-*d*:1',2'-*f*][1,3,2]dioxaphosphepin-4-amine (**L5**)

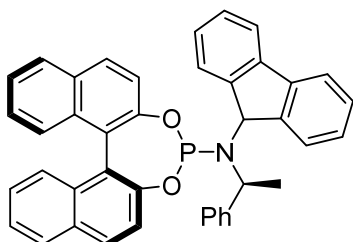

Yield: 32%;  $^1\text{H}$  NMR (500 MHz,  $\text{CDCl}_3$ ):  $\delta$  = 1.54 (d,  $J$  = 13.7 Hz, 3H), 3.37-3.45 (m, 1H), 5.30 (s, 1H), 7.00 (t,  $J$  = 7.4 Hz, 1H), 7.12-7.35 (m, 14H), 7.43 (t,  $J$  = 7.4 Hz, 1H), 7.57-7.62 (m, 3H), 7.72-7.76 (m, 3H), 7.91-7.96 (m, 2H), 8.06 (d,  $J$  = 8.6 Hz, 1H);  $^{13}\text{C}$  NMR (125 MHz,  $\text{CDCl}_3$ ):  $\delta$  = 26.1 (d,  $J$  = 25.0 Hz), 56.5 (d,  $J$  = 28.6 Hz), 62.1, 119.4, 119.5, 121.5 (d,  $J$  = 2.4 Hz), 122.3, 124.1 (d,  $J$  = 4.8 Hz), 124.4, 124.8, 125.9, 126.1, 126.3, 126.5, 126.9, 127.1, 127.1, 127.4, 127.9 (d,  $J$  = 4.8 Hz), 128.1, 128.2, 128.3, 129.7, 130.4 (d,  $J$  = 2.4 Hz), 131.4, 132.6, 132.8 (d,  $J$  = 2.4 Hz), 140.8, 140.9, 142.7, 144.5, 145.5, 149.5;  $^{31}\text{P}$  NMR (159 MHz,  $\text{CDCl}_3$ ):  $\delta$  = 144.7; IR (neat): 2919, 1590, 1449, 1385, 1092, 947, 746, 695  $\text{cm}^{-1}$ ; HRMS (ESI):  $m/z$  calcd for  $\text{C}_{41}\text{H}_{30}\text{NO}_2\text{P}$   $[\text{M}+\text{Na}]^+$  622.1906. Found 622.1914;  $[\alpha]_{\text{D}}^{20}$  = -24.9 ( $c$  = 0.73,  $\text{CHCl}_3$ ).

(11bS)-N-(9H-fluoren-9-yl)-N-((S)-1-phenylethyl)-8,9,10,11,12,13,14,15-octahydrodinaphtho[2,1- $d'$ :1',2'- $f$ ][1,3,2]dioxaphosphepin-4-amine (**L6**)

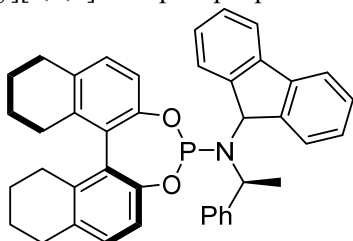

Yield: 71%;  $^1\text{H}$  NMR (500 MHz,  $\text{CDCl}_3$ ):  $\delta$  = 1.44-1.55 (m, 5H), 1.64-1.70 (m, 3H), 1.75-1.82 (m, 3H), 2.18-2.28 (m, 2H), 2.54-2.72 (m, 4H), 2.79-2.89 (m, 2H), 3.27-3.34 (m, 1H), 5.27 (s, 1H), 6.84 (d,  $J$  = 8.0 Hz, 1H), 6.98 (t,  $J$  = 7.4 Hz, 1H), 7.05-7.28 (m, 10H), 7.31-7.39 (m, 2H), 7.64 (dd,  $J$  = 16.0, 7.4 Hz, 2H), 7.94 (d,  $J$  = 6.9 Hz, 1H);  $^{13}\text{C}$  NMR (125 MHz,  $\text{CDCl}_3$ ):  $\delta$  = 22.5, 22.5, 22.6, 22.7, 26.0 (d,  $J$  = 28.6 Hz), 27.7, 27.8, 28.9, 29.2, 56.3 (d,  $J$  = 25.0 Hz), 62.0, 118.8, 119.1 (d,  $J$  = 2.4 Hz), 119.2, 119.4, 126.3 (d,  $J$  = 6.0 Hz), 126.8, 126.9 (d,  $J$  = 2.4 Hz), 127.0, 127.1 (d,  $J$  = 2.4 Hz), 127.3, 127.8 (d,  $J$  = 6.0 Hz), 128.0, 128.9, 129.3 (d,  $J$  = 4.8 Hz), 129.4, 132.8, 134.2, 137.3, 138.1 (d,  $J$  = 2.4 Hz), 140.8, 140.9, 143.1, 145.2, 145.7, 147.8 (d,  $J$  = 7.2 Hz), 149.0;  $^{31}\text{P}$  NMR (159 MHz,  $\text{CDCl}_3$ ):  $\delta$  = 138.5; IR (neat): 2928, 1580, 1469, 1218, 1092, 937, 759, 699  $\text{cm}^{-1}$ ; HRMS (ESI):  $m/z$  calcd for  $\text{C}_{41}\text{H}_{38}\text{NO}_2\text{P}$   $[\text{M}+\text{Na}]^+$  630.2532. Found 630.2554;  $[\alpha]_{\text{D}}^{20}$  = -122.4 ( $c$  = 1.2,  $\text{CHCl}_3$ ).

(11bS)-N-cyclohexyl-N-((S)-1-phenylethyl)dinaphtho[2,1- $d'$ :1',2'- $f$ ][1,3,2]dioxaphosphepin-4-amine (**L7**)

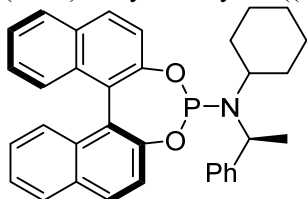

Yield: 27%;  $^1\text{H}$  NMR (500 MHz,  $\text{CDCl}_3$ ):  $\delta$  = 0.48-0.56 (m, 1H), 0.73-0.81 (m, 1H), 0.86-0.94 (m, 1H), 1.31-1.34 (m, 1H), 1.37-1.43 (m, 1H), 1.49-1.57 (m, 4H), 1.69 (d,  $J$  = 6.9 Hz, 3H), 1.82-1.84 (m, 1H), 2.71-2.77 (m, 1H), 4.49-4.56 (m, 1H), 7.21-7.34 (m, 5H), 7.37-7.42 (m, 5H), 7.53 (d,  $J$  = 8.6 Hz, 1H), 7.58 (d,  $J$  = 7.4 Hz, 2H), 7.76 (d,  $J$  = 8.6 Hz, 1H), 7.85 (d,  $J$  = 8.0 Hz, 1H), 7.91 (d,  $J$  = 8.0 Hz, 1H), 7.97 (d,  $J$  = 9.2 Hz, 1H);  $^{13}\text{C}$  NMR (125 MHz,  $\text{CDCl}_3$ ):  $\delta$  = 24.4 (d,  $J$  = 17.9 Hz), 25.3, 26.1, 33.9 (d,  $J$  = 6.0 Hz), 34.6, 53.7 (d,  $J$  = 16.7 Hz), 55.4 (d,  $J$  = 3.6 Hz), 121.6 (d,  $J$  = 2.4 Hz), 122.0, 122.4 (d,  $J$  = 2.4 Hz),

124.0, 124.1, 124.3, 124.6, 125.8, 125.9, 126.5, 127.0 (t,  $J = 2.4$  Hz), 128.0, 128.2, 128.3, 129.4, 130.2, 130.4, 131.3, 132.6, 132.8, 145.5, 150.0, 150.4, 150.4;  $^{31}\text{P}$  NMR (159 MHz,  $\text{CDCl}_3$ ):  $\delta = 150.7$ ; IR (neat): 2927, 1590, 1463, 1231, 1071, 944, 822, 750  $\text{cm}^{-1}$ ; HRMS (ESI):  $m/z$  calcd for  $\text{C}_{34}\text{H}_{32}\text{NO}_2\text{P}$   $[\text{M}+\text{Na}]^+$  540.2063. Found 540.2054;  $[\alpha]_{\text{D}}^{20} = 177.8$  ( $c = 0.82$ ,  $\text{CHCl}_3$ ).

(11b*S*)-*N*-cyclohexyl-*N*-((*S*)-1-phenylethyl)-8,9,10,11,12,13,14,15-octahydrodinaphtho[2,1-*d*:1',2'-*f*][1,3,2]dioxaphosphepin-4-amine (**L8**)

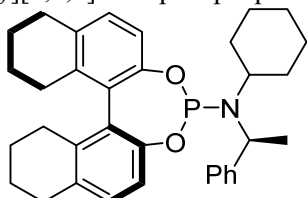

Yield: 60%;  $^1\text{H}$  NMR (500 MHz,  $\text{CDCl}_3$ ):  $\delta = 0.50$ -0.58 (m, 1H), 0.79-0.93 (m, 2H), 1.16-1.24 (m, 1H), 1.30-1.33 (m, 1H), 1.37-1.43 (m, 2H), 1.46-1.58 (m, 4H), 1.67-1.84 (m, 10H), 2.18-2.24 (m, 1H), 2.32-2.37 (m, 1H), 2.49-2.56 (m, 1H), 2.57-2.67 (m, 2H), 2.69-2.86 (m, 4H), 4.39-4.47 (m, 1H), 6.78 (d,  $J = 8.0$  Hz, 1H), 6.88 (d,  $J = 8.0$  Hz, 1H), 7.01 (d,  $J = 8.0$  Hz, 1H), 7.06 (d,  $J = 8.0$  Hz, 1H), 7.24 (t,  $J = 7.2$  Hz, 1H), 7.36 (t,  $J = 7.7$  Hz, 2H), 7.54 (d,  $J = 7.4$  Hz, 2H);  $^{13}\text{C}$  NMR (125 MHz,  $\text{CDCl}_3$ ):  $\delta = 22.6$ , 22.7, 25.4 (d,  $J = 22.7$  Hz), 25.6, 26.2, 26.4, 27.5, 27.8, 29.0, 29.2, 33.4 (d,  $J = 2.4$  Hz), 33.8, 53.8 (d,  $J = 22.7$  Hz), 55.4, 118.3, 118.8 (d,  $J = 2.4$  Hz), 126.3, 126.9 (d,  $J = 3.6$  Hz), 127.6, 128.1, 128.7, 129.3 (d,  $J = 4.8$  Hz), 132.6, 133.7, 137.5, 137.9, 146.6, 148.6, 148.6, 149.4;  $^{31}\text{P}$  NMR (159 MHz,  $\text{CDCl}_3$ ):  $\delta = 146.1$ ; IR (neat): 2923, 1581, 1469, 1221, 1094, 937, 757  $\text{cm}^{-1}$ ; HRMS (ESI):  $m/z$  calcd for  $\text{C}_{34}\text{H}_{40}\text{NO}_2\text{P}$   $[\text{M}+\text{Na}]^+$  548.2689. Found 548.2692;  $[\alpha]_{\text{D}}^{20} = 62.2$  ( $c = 0.88$ ,  $\text{CHCl}_3$ ).

(11b*S*)-*N*-cycloheptyl-*N*-((*S*)-1-phenylethyl)dinaphtho[2,1-*d*:1',2'-*f*][1,3,2]dioxaphosphepin-4-amine (**L9**)

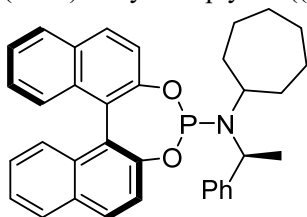

Yield: 37%;  $^1\text{H}$  NMR (500 MHz,  $\text{CDCl}_3$ ):  $\delta = 0.62$ -0.71 (m, 1H), 1.03-1.56 (m, 9H), 1.67-1.76 (m, 4H), 1.91-1.96 (m, 1H), 2.90-2.97 (m, 1H), 4.47-4.54 (m, 1H), 7.21-7.31 (m, 5H), 7.36-7.42 (m, 5H), 7.53-7.58 (m, 3H), 7.75 (d,  $J = 8.6$  Hz, 1H), 7.84 (d,  $J = 8.0$  Hz, 1H), 7.91 (d,  $J = 8.0$  Hz, 1H), 7.98 (d,  $J = 8.6$  Hz, 1H);  $^{13}\text{C}$  NMR (125 MHz,  $\text{CDCl}_3$ ):  $\delta = 24.9$ , 25.1, 26.8, 27.2, 31.6, 35.3, 37.1, 54.4 (d,  $J = 16.7$  Hz), 57.3 (d,  $J = 3.6$  Hz), 121.6 (d,  $J = 2.4$  Hz), 122.0, 122.4 (d,  $J = 2.4$  Hz), 124.0, 124.0, 124.3, 124.6, 125.8, 125.9, 126.5, 127.0 (t,  $J = 3.6$  Hz), 128.0, 128.2, 128.3, 129.5, 130.2, 130.4, 131.3, 132.6, 132.8, 145.7, 150.0, 150.3, 150.3;  $^{31}\text{P}$  NMR (159 MHz,  $\text{CDCl}_3$ ):  $\delta = 149.7$ ; IR (neat): 2925, 1462, 1231, 1071, 946, 822, 750, 626  $\text{cm}^{-1}$ ; HRMS (ESI):  $m/z$  calcd for  $\text{C}_{35}\text{H}_{34}\text{NO}_2\text{P}$   $[\text{M}+\text{Na}]^+$  554.2219. Found 554.2197;  $[\alpha]_{\text{D}}^{20} = 163.5$  ( $c = 1.2$ ,  $\text{CHCl}_3$ ).

(11b*S*)-*N*-cycloheptyl-*N*-((*S*)-1-phenylethyl)-8,9,10,11,12,13,14,15-octahydrodinaphtho[2,1-*d*:1',2'-*f*][1,3,2]dioxaphosphepin-4-amine (**L10**)

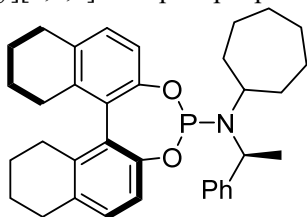

Yield: 29%;  $^1\text{H}$  NMR (500 MHz,  $\text{CDCl}_3$ ):  $\delta$  = 0.70-0.78 (m, 1H), 1.05-1.37 (m, 8H), 1.43-1.53 (m, 3H), 1.58-1.84 (m, 11H), 2.17-2.23 (m, 1H), 2.32-2.37 (m, 1H), 2.57-2.72 (m, 3H), 2.74-2.86 (m, 4H), 4.37-4.44 (m, 1H), 6.74 (d,  $J$  = 8.0 Hz, 1H), 6.88 (d,  $J$  = 8.0 Hz, 1H), 7.02 (d,  $J$  = 8.0 Hz, 1H), 7.07 (d,  $J$  = 8.0 Hz, 1H), 7.24 (t,  $J$  = 7.4 Hz, 1H), 7.36 (t,  $J$  = 7.4 Hz, 2H), 7.54 (d,  $J$  = 7.4 Hz, 2H);  $^{13}\text{C}$  NMR (125 MHz,  $\text{CDCl}_3$ ):  $\delta$  = 22.6, 22.7 (d,  $J$  = 2.4 Hz), 25.2, 25.4, 26.6, 27.4, 27.6, 27.9, 29.0, 29.2, 34.5, 36.4, 54.5 (d,  $J$  = 21.5 Hz), 57.0, 118.3, 118.8 (d,  $J$  = 2.4 Hz), 126.3, 126.8 (d,  $J$  = 3.6 Hz), 127.7, 128.2, 128.9, 129.2, 132.5, 133.7, 137.5, 137.9, 146.8, 148.5, 148.5, 149.5;  $^{31}\text{P}$  NMR (159 MHz,  $\text{CDCl}_3$ ):  $\delta$  = 144.5; IR (neat): 2924, 1716, 1541, 1221, 1094, 938, 758  $\text{cm}^{-1}$ ; HRMS (ESI):  $m/z$  calcd for  $\text{C}_{35}\text{H}_{42}\text{NO}_2\text{P}$   $[\text{M}+\text{Na}]^+$  562.2845. Found 562.2844;  $[\alpha]_{\text{D}}^{20}$  = 67.0 ( $c$  = 0.99,  $\text{CHCl}_3$ ).

(11b*S*)-*N*-cyclooctyl-*N*-((*S*)-1-phenylethyl)dinaphtho[2,1-*d*:1',2'-*f*][1,3,2]dioxaphosphepin-4-amine (**L11**)

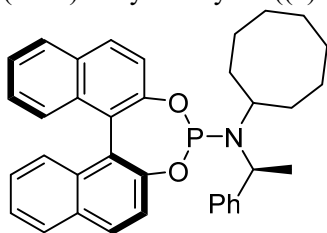

Yield: 16%;  $^1\text{H}$  NMR (400 MHz,  $\text{CDCl}_3$ ):  $\delta$  = 0.47-0.61 (br, 1H), 0.85-1.12 (m, 6H), 1.21-1.58 (m, 5H), 1.69 (d,  $J$  = 6.9 Hz, 3H), 1.77-1.87 (m, 2H), 3.11-3.18 (m, 1H), 4.44-4.53 (m, 1H), 7.21-7.27 (m, 2H), 7.29-7.32 (m, 2H), 7.34-7.43 (m, 6H), 7.54-7.59 (m, 3H), 7.78 (d,  $J$  = 9.2 Hz, 1H), 7.84 (d,  $J$  = 8.2 Hz, 1H), 7.92 (d,  $J$  = 8.2 Hz, 1H), 7.98 (d,  $J$  = 9.2 Hz, 1H);  $^{13}\text{C}$  NMR (100 MHz,  $\text{CDCl}_3$ ):  $\delta$  = 23.7, 25.0, 25.7, 25.7, 26.0, 28.9, 35.0, 36.0, 54.7 (d,  $J$  = 17.2 Hz), 55.3 (d,  $J$  = 2.9 Hz), 121.7 (d,  $J$  = 1.9 Hz), 122.1, 122.4 (d,  $J$  = 1.9 Hz), 123.9, 124.0, 124.3, 124.6, 125.8, 125.9, 126.5, 126.9 (t,  $J$  = 2.9 Hz), 127.0, 128.0, 128.2 (d,  $J$  = 1.9 Hz), 129.7, 130.2, 130.5, 131.2, 132.8, 132.8, 132.8, 150.0, 150.2, 150.3;  $^{31}\text{P}$  NMR (159 MHz,  $\text{CDCl}_3$ ):  $\delta$  = 149.8; IR (neat): 2920, 1716, 1507, 1231, 1070, 947, 822, 749  $\text{cm}^{-1}$ ; HRMS (ESI):  $m/z$  calcd for  $\text{C}_{36}\text{H}_{36}\text{NO}_2\text{P}$   $[\text{M}+\text{Na}]^+$  568.2376. Found 568.2366;  $[\alpha]_{\text{D}}^{20}$  = 146.5 ( $c$  = 0.97,  $\text{CHCl}_3$ ).

(11b*S*)-*N*-cyclooctyl-*N*-((*S*)-1-phenylethyl)-8,9,10,11,12,13,14,15-octahydrodinaphtho[2,1-*d*:1',2'-*f*][1,3,2]dioxaphosphepin-4-amine (**L12**)

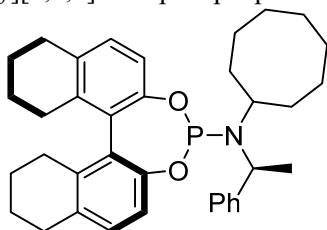

Yield: 44%;  $^1\text{H}$  NMR (500 MHz,  $\text{CDCl}_3$ ):  $\delta$  = 0.86-0.96 (m, 2H), 1.07-1.44 (m, 10H), 1.49-1.56 (m, 3H), 1.69-1.78 (m, 10H), 2.20-2.24 (m, 1H), 2.30-2.35 (m, 1H), 2.59-2.71 (m, 3H), 2.75-2.86 (m, 3H), 3.07-3.12 (m, 1H), 4.34-4.41 (m, 1H), 6.80 (d,  $J$  = 8.3 Hz, 1H), 6.91 (d,  $J$  = 8.3 Hz, 1H), 7.03 (d,  $J$  = 8.0 Hz, 1H), 7.08 (d,  $J$  = 8.0 Hz, 1H), 7.24 (t,  $J$  = 7.4 Hz, 1H), 7.36 (t,  $J$  = 7.7 Hz, 2H), 7.55 (d,  $J$  = 7.4 Hz, 2H);  $^{13}\text{C}$  NMR (125 MHz,  $\text{CDCl}_3$ ):  $\delta$  = 22.6, 22.7, 22.7, 22.8, 23.5, 24.7, 25.9, 26.0, 26.6, 27.6, 28.0, 29.1, 29.2, 34.7, 35.4, 54.8 (d,  $J$  = 20.3 Hz), 55.1, 118.4, 118.9 (d,  $J$  = 2.4 Hz), 126.3, 126.7 (d,  $J$  = 3.6 Hz), 127.7, 128.2, 129.2, 129.2, 132.5, 133.8, 137.3, 137.9, 147.3, 148.5, 148.5, 149.5;  $^{31}\text{P}$  NMR (159 MHz,  $\text{CDCl}_3$ ):  $\delta$  = 143.1; IR (neat): 2924, 1653, 1470, 1221, 1101, 939, 758, 699  $\text{cm}^{-1}$ ; HRMS (ESI):  $m/z$  calcd for  $\text{C}_{36}\text{H}_{44}\text{NO}_2\text{P}$   $[\text{M}+\text{Na}]^+$  576.3002. Found 576.2986;  $[\alpha]_{\text{D}}^{20}$  = 73.6 ( $c$  = 1.0,  $\text{CHCl}_3$ ).

(11b*S*)-*N,N*-bis((*S*)-1-(2-methoxyphenyl)ethyl)-2,6-dimethyldinaphtho[2,1-*d*:1',2'-*f*][1,3,2]dioxaphosphepin-4-amine (**L14**)

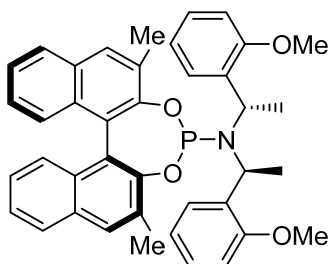

Yield: 64%;  $^1\text{H}$  NMR (400 MHz,  $\text{CDCl}_3$ ):  $\delta$  = 1.56 (d,  $J$  = 7.8 Hz, 6H), 2.14 (s, 3H), 2.76 (s, 3H), 3.55 (s, 6H), 4.99-5.06 (m, 2H), 6.60 (d,  $J$  = 8.2 Hz, 2H), 6.77 (t,  $J$  = 7.8 Hz, 2H), 7.05-7.12 (m, 5H), 7.21-7.34 (m, 3H), 7.46 (s, 1H), 7.60 (d,  $J$  = 7.8 Hz, 2H), 7.70 (d,  $J$  = 8.2 Hz, 1H), 7.81-7.83 (m, 2H);  $^{13}\text{C}$  NMR (125 MHz,  $\text{CDCl}_3$ ):  $\delta$  = 17.8 (d,  $J$  = 14.3 Hz), 22.3, 51.5 (d,  $J$  = 15.5 Hz), 54.7, 109.4, 119.7, 121.3 (d,  $J$  = 3.6 Hz), 123.9, 124.1, 124.4, 124.6 (d,  $J$  = 2.4 Hz), 124.9, 127.1 (d,  $J$  = 3.6 Hz), 127.4, 127.6 (d,  $J$  = 4.8 Hz), 129.0, 129.2, 129.6, 129.7, 130.1, 130.3, 130.8, 131.2, 131.8, 131.8, 132.8, 149.3, 150.4, 150.4, 156.0;  $^{31}\text{P}$  NMR (159 MHz,  $\text{CDCl}_3$ ):  $\delta$  = 150.7; IR (neat): 2930, 1601, 1461, 1240, 1094, 1034, 903, 750  $\text{cm}^{-1}$ ; HRMS (ESI):  $m/z$  calcd for  $\text{C}_{40}\text{H}_{38}\text{NO}_4\text{P}$   $[\text{M}+\text{Na}]^+$  650.2431. Found 650.2431;  $[\alpha]_{\text{D}}^{20}$  = -242.0 ( $c$  = 1.14,  $\text{CHCl}_3$ ).

(9a*S*)-*N,N*-bis((*S*)-1-(2-methoxyphenyl)ethyl)-9,10-diphenyldinaphtho[1,2-*d*:2',1'-*f*][1,3,2]dioxaphosphepin-2-amine (**L16**)

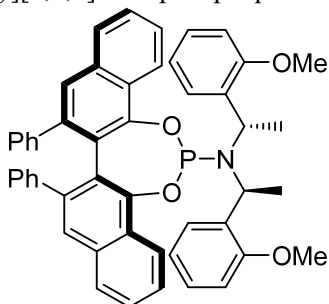

Yield: 91%;  $^1\text{H}$  NMR (500 MHz,  $\text{CDCl}_3$ ):  $\delta$  = 1.49 (d,  $J$  = 5.2 Hz, 6H), 3.61 (s, 6H), 5.06-5.12 (m, 2H), 6.48 (d,  $J$  = 6.9 Hz, 2H), 6.56 (t,  $J$  = 7.2 Hz, 4H), 6.84-6.92 (m, 6H), 7.03-7.09 (m, 4H), 7.16-7.19 (m, 1H), 7.26 (s, 1H), 7.34-7.37 (m, 1H), 7.42 (s, 1H), 7.55-7.58 (m, 1H), 7.65-7.70 (m, 2H), 7.72-7.74 (m, 2H), 7.83 (d,  $J$  = 8.6 Hz, 1H), 7.93 (d,  $J$  = 8.6 Hz, 1H), 8.58 (d,  $J$  = 8.6 Hz, 1H);  $^{13}\text{C}$  NMR (125 MHz,  $\text{CDCl}_3$ ):  $\delta$  = 22.3 (d,  $J$  = 10.7 Hz), 52.1 (d,  $J$  = 15.5 Hz), 54.7, 109.5, 119.8, 122.3, 122.3 (d,  $J$  = 2.4 Hz), 123.2, 123.8, 125.1, 125.5, 125.5, 125.8, 126.0, 126.1, 126.3, 126.6, 126.7, 126.8, 127.0, 127.4, 127.4, 127.6 (d,  $J$  = 4.8 Hz), 128.0, 129.1, 129.2, 132.9 (d,  $J$  = 2.4 Hz), 133.7, 134.2, 140.5, 140.6, 140.8, 140.8, 147.9, 149.1, 149.2, 156.0;  $^{31}\text{P}$  NMR (159 MHz,  $\text{CDCl}_3$ ):  $\delta$  = 157.2; IR (neat): 2925, 2378, 1716, 1489, 1362, 1240, 1087, 750  $\text{cm}^{-1}$ ; HRMS (ESI):  $m/z$  calcd for  $\text{C}_{50}\text{H}_{42}\text{NO}_4\text{P}$   $[\text{M}+\text{Na}]^+$  774.2744. Found 774.2720;  $[\alpha]_{\text{D}}^{20}$  = 109.1 ( $c$  = 1.4,  $\text{CHCl}_3$ ).

## Preparation of L17

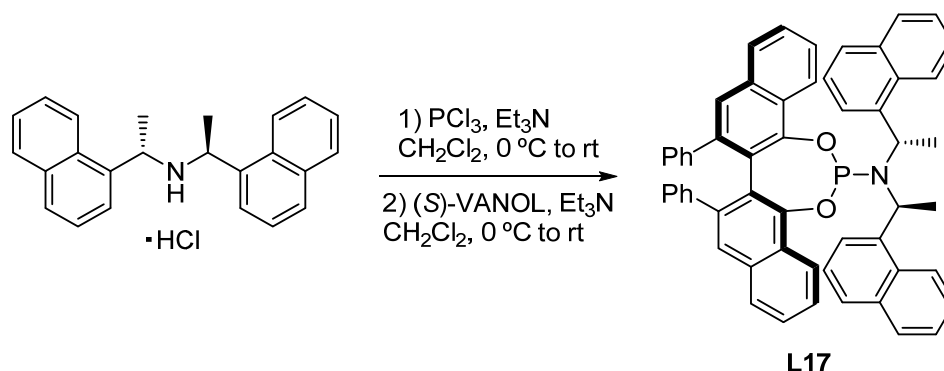

A solution of bis[(*S*)-(-)-(1-naphthyl)ethyl]amine hydrochloride (74 mg, 0.20 mmol, 1.1 equiv) and Et<sub>3</sub>N (120  $\mu$ L, 0.84 mmol, 6 equiv) in dry CH<sub>2</sub>Cl<sub>2</sub> (2.0 mL) was added to a dry Schlenk tube containing 3A molecular sieves (600 mg) under argon atmosphere. The mixture was cooled down to 0 °C and PCl<sub>3</sub> (162  $\mu$ L, 1.86 mmol, 10.3 equiv) was added dropwise. The mixture was stirred at room temperature for 2 h and the volatiles were carefully removed connecting the Schlenk tube to high vacuum. The resulting yellowish solid was dissolved in dry CH<sub>2</sub>Cl<sub>2</sub> (2.0 mL) under argon atmosphere and then volatiles were removed again under vacuum. This procedure was repeated twice in order to remove excess of PCl<sub>3</sub>. Then, the resulting residue was dissolved in dry CH<sub>2</sub>Cl<sub>2</sub> (2.0 mL), Et<sub>3</sub>N (120  $\mu$ L, 0.84 mmol, 6 equiv) was added and the mixture was cooled down to 0 °C. A solution of (*S*)-VANOL (79 mg, 0.18 mmol, 1 equiv) and Et<sub>3</sub>N (120  $\mu$ L, 0.84 mmol, 6 equiv) in dry CH<sub>2</sub>Cl<sub>2</sub> (2.0 mL) was then added dropwise at 0 °C. The resulting mixture was allowed to warm to room temperature and stirred for 16 h. The solvent was evaporated and the crude residue was purified by column chromatography (hexane/EtOAc = 15/1) to yield the pure ligand **L17** (69 mg, 48%).

(9a*S*)-*N,N*-bis((*S*)-1-(naphthalen-1-yl)ethyl)-9,10-diphenyldinaphtho[1,2-*d*:2',1'-*f*][1,3,2]dioxaphosphepin-2-amine (**L17**)

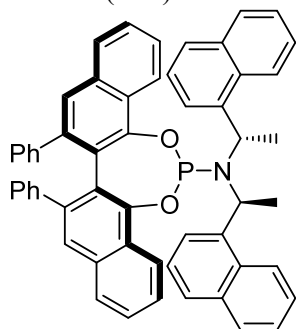

<sup>1</sup>H NMR (500 MHz, CDCl<sub>3</sub>):  $\delta$  = 1.60-1.70 (m, 6H), 5.49-5.58 (m, 2H), 6.48-6.51 (m, 4H), 6.87-6.92 (m, 4H), 6.99 (t, *J* = 7.7 Hz, 2H), 7.03-7.09 (m, 2H), 7.15-7.19 (m, 2H), 7.27-7.33 (m, 3H), 7.38-7.41 (m, 4H), 7.46 (s, 1H), 7.53 (d, *J* = 8.6 Hz, 1H), 7.63-7.75 (m, 5H), 7.78-7.84 (m, 3H), 7.89 (d, *J* = 8.6 Hz, 1H), 8.05 (d, *J* = 8.6 Hz, 1H), 8.66 (d, *J* = 8.6 Hz, 1H); <sup>13</sup>C NMR (125 MHz, CDCl<sub>3</sub>):  $\delta$  = 22.9 (d, *J* = 8.3 Hz), 54.1 (d, *J* = 19.2 Hz), 122.3, 122.4 (d, *J* = 2.4 Hz), 122.7, 122.9 (d, *J* = 3.6 Hz), 124.2, 124.4 (d, *J* = 2.4 Hz), 124.8, 125.0, 125.3, 125.5, 125.6, 125.6, 126.1, 126.2, 126.5, 126.6, 126.6, 126.9, 127.0, 127.0, 127.3, 127.4 (d, *J* = 3.6 Hz), 128.2, 128.7, 129.2, 129.2, 130.5 (d, *J* = 2.4 Hz), 133.3, 133.8, 134.4, 139.3 (d, *J* = 2.4 Hz), 140.4, 140.5, 140.7, 140.8, 147.7, 149.1, 149.2; <sup>31</sup>P NMR (159 MHz, CDCl<sub>3</sub>):  $\delta$  = 154.2; IR (neat): 2926, 2374, 1716, 1508, 1362, 1086, 761, 698 cm<sup>-1</sup>; HRMS (ESI): *m/z* calcd for C<sub>56</sub>H<sub>42</sub>NO<sub>2</sub>P [M+Na]<sup>+</sup> 814.2845. Found 814.2863; [ $\alpha$ ]<sub>D</sub><sup>20</sup> = 169.6 (*c* = 1.3, CHCl<sub>3</sub>).

## Preparation of L18

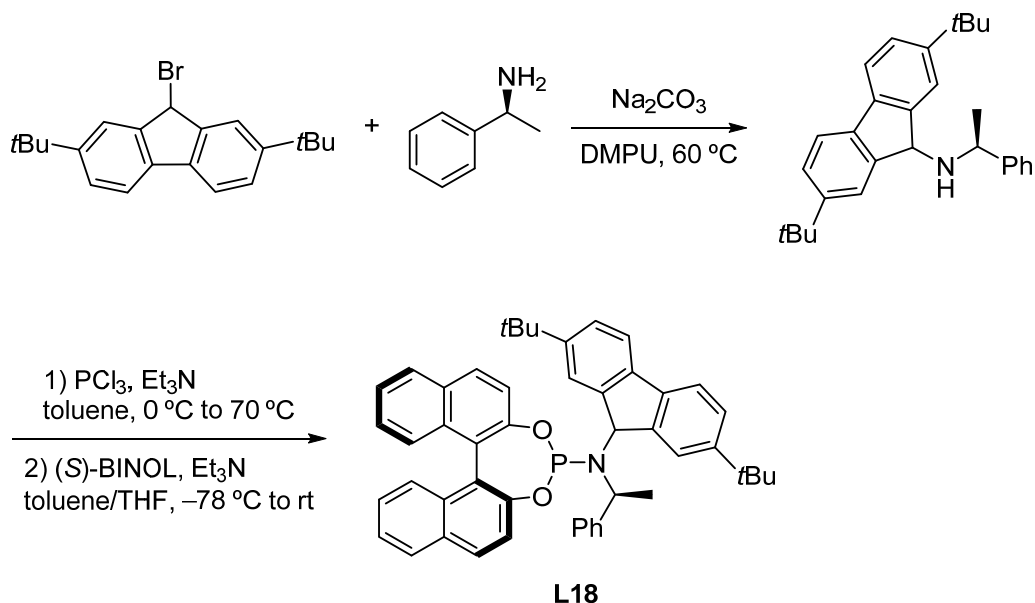

Under argon atmosphere, 9-bromo-2,7-di-*tert*-butyl-9*H*-fluorene (2.0 g, 5.6 mmol, 1.19 equiv) and  $\text{Na}_2\text{CO}_3$  (1.0 g, 9.3 mmol, 1.98 equiv) were mixed with 19 mL of dry DMPU. The resulting white suspension was then treated with (*S*)-1-phenylethan-1-amine (0.57 g, 4.7 mmol, 1 equiv), and the reaction mixture was stirred in an oil bath at 60 °C for 12 hours. At the end of the reaction, the suspension was cooled down to 0 °C, and diluted with 15 mL of  $\text{H}_2\text{O}$ . Products were extracted with  $\text{Et}_2\text{O}$  (15 mL x 3). The combined organic extracts were washed with  $\text{H}_2\text{O}$  (15 mL x 3), dried over  $\text{Na}_2\text{SO}_4$ , filtered, and evaporated. The resulting residue was directly subjected to silica gel flash chromatography (hexane/ $\text{EtOAc}$  = 10/1) to give (*S*)-2,7-di-*tert*-butyl-*N*-(1-phenylethyl)-9*H*-fluoren-9-amine (1.8 g, 97%).

(*S*)-2,7-di-*tert*-butyl-*N*-(1-phenylethyl)-9*H*-fluoren-9-amine

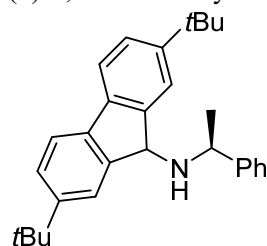

$^1\text{H}$  NMR (500 MHz,  $\text{CDCl}_3$ ):  $\delta$  = 1.32 (s, 12H), 1.39 (s, 9H), 4.08 (q,  $J$  = 6.5 Hz, 1H), 4.73 (s, 1H), 7.21-7.24 (m, 1H), 7.31-7.41 (m, 6H), 7.47 (s, 1H), 7.55 (d,  $J$  = 8.0 Hz, 2H), 7.60 (s, 1H);  $^{13}\text{C}$  NMR (125 MHz,  $\text{CDCl}_3$ ):  $\delta$  = 25.5, 31.5, 31.6, 34.7, 34.9, 55.6, 61.8, 118.8, 119.0, 122.0, 122.1, 124.8, 124.9, 126.9, 126.9, 128.4, 137.8, 137.9, 146.2, 146.4, 146.5, 149.6, 150.0; IR (neat): 3335, 2961, 1477, 1362, 1257, 820, 700  $\text{cm}^{-1}$ ; HRMS (ESI):  $m/z$  calcd for  $\text{C}_{29}\text{H}_{35}\text{N}$   $[\text{M}+\text{H}]^+$  398.2842. Found 398.2827;

A flame-dried 200 mL flask, equipped with a magnetic stirring bar, was charged with toluene (30 mL) and  $\text{PCl}_3$  (0.39 mL, 4.5 mmol, 1.1 equiv), and then the solution was cooled to 0 °C. Another flame-dried, 20 mL flask was charged with secondary amine (1.8 g, 4.5 mmol, 1.1 equiv), toluene (4.8 mL), and  $\text{Et}_3\text{N}$  (1.1 mL, 7.4 mmol, 1.8 equiv). This mixture was added dropwise to the above mentioned  $\text{PCl}_3$  solution at 0 °C. After the addition was complete, the reaction mixture was heated at 70 °C for 6 h, and then was cooled to -78 °C. To this flask at -78 °C, a solution of (*S*)-BINOL (1.2 g, 4.1 mmol, 1 equiv) and  $\text{Et}_3\text{N}$  (2.2 mL, 14.8 mmol, 3.6 equiv) in toluene (18 mL) and THF (3.5 mL) was added slowly. The resulting

mixture was stirred at room temperature overnight, then filtered through celite, and washed with Et<sub>2</sub>O. The organic phase was concentrated in vacuo. The product was purified by column chromatography (hexane/EtOAc = 15/1). The solvent was evaporated in vacuo to afford the pure ligand **L18** (2.4 g, 80%).

(11b*S*)-*N*-(2,7-di-*tert*-butyl-9*H*-fluoren-9-yl)-*N*-((*S*)-1-phenylethyl)dinaphtho[2,1-*d*:1',2'-*f*][1,3,2]dioxaphosphin-4-amine (**L18**)

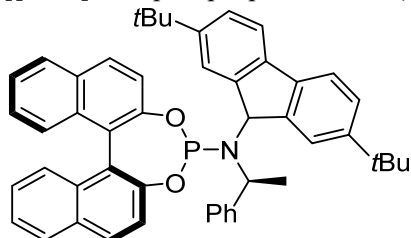

<sup>1</sup>H NMR (500 MHz, CDCl<sub>3</sub>): δ = 1.31 (s, 9H), 1.45 (s, 9H), 1.57 (d, *J* = 6.9 Hz, 3H), 3.39-3.47 (m, 1H), 5.32 (s, 1H), 7.20-7.41 (m, 13H), 7.48 (t, *J* = 7.4 Hz, 1H), 7.53 (t, *J* = 8.6 Hz, 2H), 7.67 (d, *J* = 9.2 Hz, 1H), 7.77-7.82 (m, 3H), 8.01 (d, *J* = 8.6 Hz, 1H), 8.11-8.13 (m, 2H); <sup>13</sup>C NMR (125 MHz, CDCl<sub>3</sub>): δ = 14.2, 22.7, 26.5 (d, *J* = 25.0 Hz), 31.5 (d, *J* = 9.5 Hz), 34.8 (d, *J* = 20.3 Hz), 56.6 (d, *J* = 25.0 Hz), 62.4 (d, *J* = 4.8 Hz), 118.7, 118.8, 121.9 (d, *J* = 2.4 Hz), 122.0, 122.5, 123.4, 123.8, 124.0, 124.1, 124.5, 124.8, 125.2 (d, *J* = 3.6 Hz), 125.9, 126.1, 126.5, 126.7 (d, *J* = 4.8 Hz), 127.1 (d, *J* = 6.0 Hz), 128.1, 128.1, 128.3, 129.5, 130.5, 130.6, 131.4, 132.7, 132.9, 138.2, 138.5, 142.7, 144.6, 145.9, 148.9, 149.3, 149.3, 149.7, 149.9; <sup>31</sup>P NMR (159 MHz, CDCl<sub>3</sub>): δ = 146.4; IR (neat): 2961, 1458, 1230, 1093, 948, 819, 771, 695 cm<sup>-1</sup>; HRMS (ESI): *m/z* calcd for C<sub>49</sub>H<sub>46</sub>NO<sub>2</sub>P [M+Na]<sup>+</sup> 734.3158. Found 734.3152; [α]<sub>D</sub><sup>20</sup> = -41.0 (*c* = 1.3, CHCl<sub>3</sub>).



## 5. Determination of Relative and Absolute Configuration of the Products

The relative and absolute configuration of **2a** was determined by comparing with the spectra data of **4** (Ref.14 in main text) after conversion into **9** as shown in the following scheme. NMR spectra of **3** matched with that of **9**, suggesting **3** has the same relative configuration with **9**. HPLC analysis revealed that absolute configuration of **3** and **9** were opposite. From these results, we confirmed product **2a** in the reaction with Ir/**L18** and B/*R* to be (2*S*,3*R*)-**2a**. Those of other products **2** were assigned by analogy.

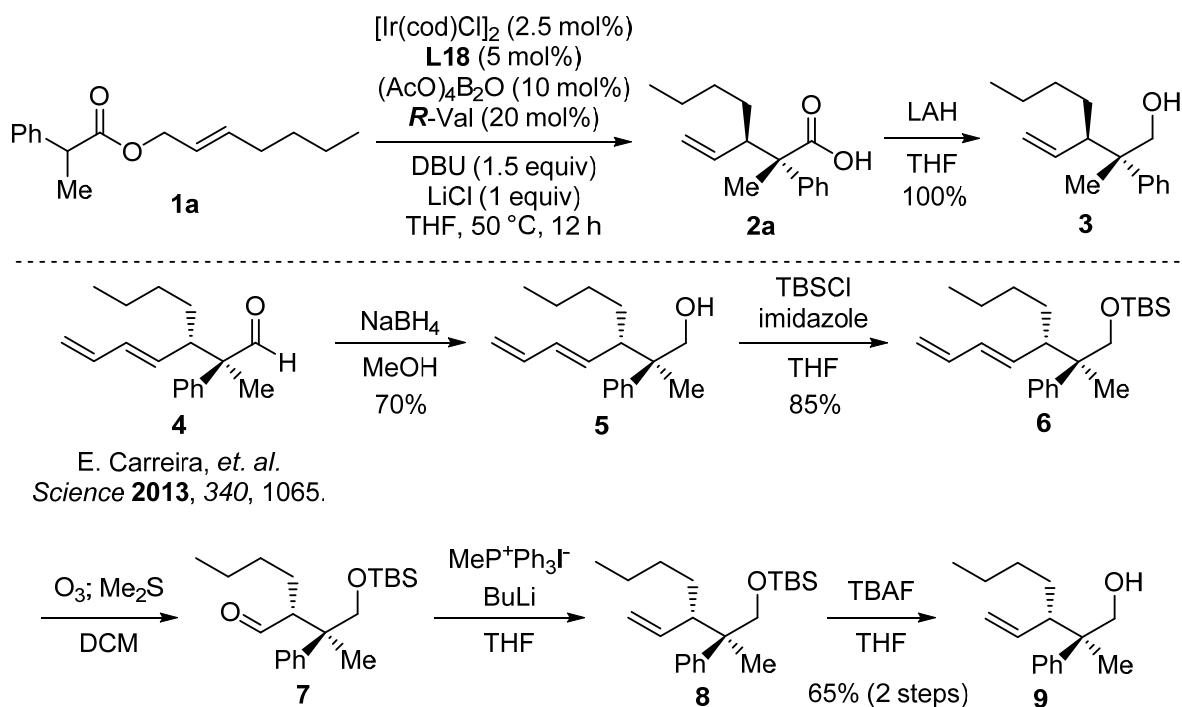

E. Carreira, *et. al.*  
*Science* **2013**, 340, 1065.

### Procedure for preparation of **3** from **2a**

To a solution of  $\text{LiAlH}_4$  (77.0 mg, 2.0 mmol, 10 equiv) in THF (2 ml), **2a** (50.0 mg, 0.20 mmol, 1 equiv) was added at  $-78^\circ\text{C}$  and the reaction mixture was stirred at reflux temperature for overnight. The reaction was quenched with  $\text{H}_2\text{O}$  (0.05 mL). 15% NaOH solution in  $\text{H}_2\text{O}$  (0.05 mL) and  $\text{H}_2\text{O}$  (0.15 mL) were added successively. The mixture was stirred for 1 h and the solid was filtered through pad of celite. The crude solution was evaporated to give **3** (47 mg, 10/1 dr, 100%) as a colorless oil.

(2*S*,3*R*)-2-methyl-2-phenyl-3-vinylheptan-1-ol (**3**)

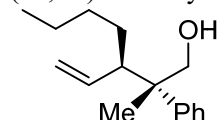

$^1\text{H}$  NMR (500 MHz,  $\text{CDCl}_3$ ): major diastereomer  $\delta$  = 0.78-1.50 (m, 9H), 1.55 (s, 3H), 2.32-2.42 (m, 1H), 3.71 (d,  $J$  = 9.2 Hz, 1H), 3.78 (d,  $J$  = 9.2 Hz, 1H), 4.87 (dd,  $J$  = 17.2, 2.3 Hz, 1H), 4.96 (dd,  $J$  = 10.0, 2.3 Hz, 1H), 5.42 (ddd,  $J$  = 17.2, 10.0, 9.7 Hz, 1H), 7.16 (t,  $J$  = 7.4 Hz, 1H), 7.18-7.27 (m, 2H), 7.30-7.36 (m, 2H); HPLC (chiral column: CHIRALCEL OZ-H; solvent: hexane/2-propanol = 100/1; flow rate: 1.0 mL/min; detection: at 210 nm; rt): 99% ee,  $t_R$  = 11.2 min (major),  $t_R$  = 11.6 min (minor)

### Procedure for preparation of **9** from **4**

To a solution of **4** (217.1 mg, 0.85 mmol, 1equiv) in MeOH (4 ml),  $\text{NaBH}_4$  (64.1 mg, 1.69 mmol, 2 equiv) was added at  $0^\circ\text{C}$  and the reaction mixture was stirred at room temperature for 2 h. The reaction

was quenched with NH<sub>4</sub>Cl aq and products were extracted with EtOAc. The organic layer was dried over Na<sub>2</sub>SO<sub>4</sub>, filtered and concentrated under reduced pressure to afford the crude product. The crude product was purified by column chromatography (hexane/EtOAc). **5** was obtained as a colorless oil (153.8 mg, 70%).

To a solution of **5** (153.8 mg, 0.60 mmol, 1 equiv) and imidazole (101.3 mg, 1.49 mmol, 2.47 equiv) in DCM (3 ml), TBSCl (134.6 mg, 0.89 mmol, 1.48 equiv) was added at room temperature and the reaction mixture was stirred for 2 h. The reaction was quenched with H<sub>2</sub>O and products were extracted with EtOAc. The organic layer was dried over Na<sub>2</sub>SO<sub>4</sub>, filtered and concentrated under reduced pressure to afford the crude product. The crude product was purified by column chromatography (hexane/EtOAc). **6** was obtained as a colorless oil (187.5 mg, 85%).

Ozone was bubbled through a solution of **6** (187.5 mg, 0.50 mmol) in DCM (4 ml) at -78 °C until the solution took on a characteristic blue color. Two drops of Me<sub>2</sub>S was added to the reaction mixture. The mixture was stirred at room temperature for 1 h. After evaporation, the crude product was purified by column chromatography (hexane/EtOAc). **7** was obtained as a colorless oil (82.3 mg, 50%).

A flame-dried round-bottom flask was charged with methyltriphenylphosphonium iodide (487 mg, 1.20 mmol, 5 equiv) and THF (8 mL), and the solution was cooled to -78 °C. *n*BuLi (0.74 ml, 1.59 M in hexane, 1.18 mmol, 4.9 equiv) was added dropwise over 3 min, and the reaction was stirred for 30 min at 0 °C, then 1 h at room temperature. The solution was then cooled to -78 °C, and **7** (82.3 mg, 0.24 mmol, 1 equiv) in THF (1 mL) was added via syringe with rinsing with THF (2 × 0.5 mL). The reaction mixture was allowed to warm to room temperature, and the mixture was stirred for overnight. H<sub>2</sub>O was added, and the solution was extracted with EtOAc. The organic layer was dried over Na<sub>2</sub>SO<sub>4</sub>, filtered and concentrated under reduced pressure to afford the crude product. The crude product was purified by column chromatography (hexane/EtOAc). **8** was obtained as a colorless oil.

To a solution of **8** in THF (2 mL), TBAF (0.38 ml, 1.0 M in THF, 0.38 mmol, 1.6 equiv) was added at room temperature and the reaction mixture was stirred for 5 h. The reaction was quenched with H<sub>2</sub>O and products were extracted with EtOAc. The organic layer was dried over Na<sub>2</sub>SO<sub>4</sub>, filtered and concentrated under reduced pressure to afford the crude product. The crude product was purified by column chromatography (hexane/EtOAc). **9** was obtained as a colorless oil (22.9 mg, 4/1 dr, 65% in 2 steps).

(2*R*,3*S*)-2-methyl-2-phenyl-3-vinylheptan-1-ol (**9**)

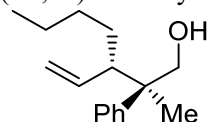

<sup>1</sup>H NMR (500 MHz, CDCl<sub>3</sub>): major diastereomer δ = 0.78-1.50 (m, 9H), 1.55 (s, 3H), 2.32-2.42 (m, 1H), 3.71 (d, *J* = 9.2 Hz, 1H), 3.78 (d, *J* = 9.2 Hz, 1H), 4.87 (dd, *J* = 17.2, 2.3 Hz, 1H), 4.96 (dd, *J* = 10.0, 2.3 Hz, 1H), 5.42 (ddd, *J* = 17.2, 10.0, 9.7 Hz, 1H), 7.16 (t, *J* = 7.4 Hz, 1H), 7.18-7.27 (m, 2H), 7.30-7.36 (m, 2H); HPLC (chiral column: CHIRALCEL OZ-H; solvent: hexane/2-propanol = 100/1; flow rate: 1.0 mL/min; detection: at 210 nm; rt): 99% ee, *t<sub>R</sub>* = 10.8 min (minor), *t<sub>R</sub>* = 11.6 min (major)

HPLC chart  
Racemate

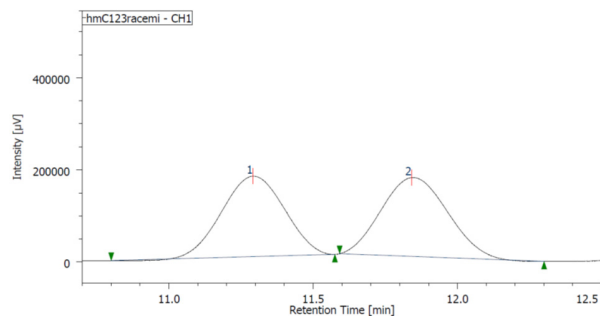

チャンネル情報+ピーク情報  
クロマトグラム名 hmC123racemi-CH1  
サンプル名  
チャンネル名 CH1  
データ取り込み間隔 500 [msec]  
波形処理メソッド (マニュアル)  
数値計算式  
判定式

| # | ピーク名    | CH | tR [min] | 面積 [μV·sec] | 高さ [μV] | 面積%    | 高さ%    | 定量値 | NTP   | 分離度   | シンメトリー係数 | 警告 |
|---|---------|----|----------|-------------|---------|--------|--------|-----|-------|-------|----------|----|
| 1 | Unknown | 1  | 11.292   | 2642422     | 174955  | 49.082 | 50.511 | N/A | 11964 | 1.296 | 0.985    |    |
| 2 | Unknown | 1  | 11.842   | 2741273     | 171413  | 50.918 | 49.488 | N/A | 11686 | N/A   | 1.119    |    |

3

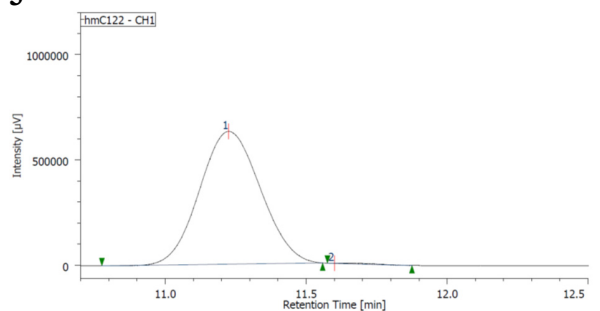

チャンネル情報+ピーク情報  
クロマトグラム名 hmC122-CH1  
サンプル名  
チャンネル名 CH1  
データ取り込み間隔 500 [msec]  
波形処理メソッド (マニュアル)  
数値計算式  
判定式

| # | ピーク名    | CH | tR [min] | 面積 [μV·sec] | 高さ [μV] | 面積%    | 高さ%    | 定量値 | NTP   | 分離度   | シンメトリー係数 | 警告 |
|---|---------|----|----------|-------------|---------|--------|--------|-----|-------|-------|----------|----|
| 1 | Unknown | 1  | 11.225   | 9459911     | 630757  | 99.724 | 99.930 | N/A | 12394 | 0.964 | 1.064    |    |
| 2 | Unknown | 1  | 11.600   | 26229       | 438     | 0.276  | 0.070  | N/A | 15154 | N/A   | 6.211    |    |

9

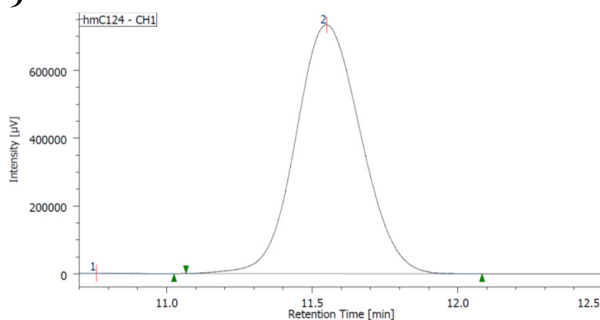

チャンネル情報+ピーク情報  
クロマトグラム名 hmC124-CH1  
サンプル名  
チャンネル名 CH1  
データ取り込み間隔 500 [msec]  
波形処理メソッド (マニュアル)  
数値計算式  
判定式

| # | ピーク名    | CH | tR [min] | 面積 [μV·sec] | 高さ [μV] | 面積%    | 高さ%    | 定量値 | NTP   | 分離度   | シンメトリー係数 | 警告 |
|---|---------|----|----------|-------------|---------|--------|--------|-----|-------|-------|----------|----|
| 1 | Unknown | 1  | 10.798   | 14648       | 1484    | 0.128  | 0.202  | N/A | 22877 | 2.281 | 1.068    |    |
| 2 | Unknown | 1  | 11.550   | 11419560    | 733304  | 99.872 | 99.798 | N/A | 12611 | N/A   | 1.070    |    |

## 6. Stereodivergent Transformation of 2a

### Procedure for preparation of (3*S*,4*S*,5*S*)-3a

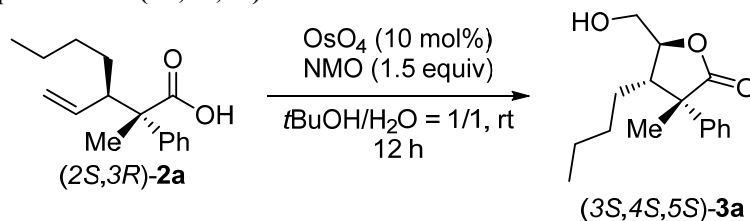

To a solution of (2*S*,3*R*)-**2a** (20.0 mg, 0.0812 mmol, 1 equiv) and *N*-methylmorpholine (14.3 mg, 0.122 mmol, 1.5 equiv) in *t*BuOH (0.4 mL) and H<sub>2</sub>O (0.5 mL), OsO<sub>4</sub> (105  $\mu$ L, 8.12  $\mu$ mol, 10 mol%, 2.5 w% in *t*BuOH) was added at rt and the reaction mixture was stirred for 12 h. The reaction was diluted with H<sub>2</sub>O and EtOAc and products were extracted with EtOAc three times. The organic layer was dried over Na<sub>2</sub>SO<sub>4</sub>, filtered and concentrated under reduced pressure to afford the crude product. Diastereomeric ratio was determined by <sup>1</sup>H NMR analysis (>50/1 dr). The crude product was purified by column chromatography (hexane/EtOAc). (3*S*,4*S*,5*S*)-**3a** was obtained as a colorless oil (22.8 mg, 100%).

### (3*S*,4*S*,5*S*)-4-butyl-5-(hydroxymethyl)-3-methyl-3-phenyldihydrofuran-2(3*H*)-one ((3*S*,4*S*,5*S*)-**3a**)

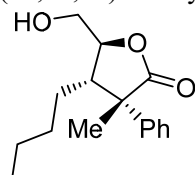

<sup>1</sup>H NMR (400 MHz, CDCl<sub>3</sub>):  $\delta$  = 0.84 (t, *J* = 7.1 Hz, 3H), 1.21-1.38 (m, 6H), 1.74 (s, 3H), 2.39-2.42 (m, 1H), 3.73 (dd, *J* = 12.8, 4.1 Hz, 1H), 4.08-4.11 (m, 1H), 4.19-4.22 (m, 1H), 7.25 (d, *J* = 8.2 Hz, 2H), 7.32-7.43 (m, 3H); <sup>13</sup>C NMR (100 MHz, CDCl<sub>3</sub>):  $\delta$  = 13.7, 22.7, 23.2, 27.8, 29.8, 47.3, 52.6, 62.6, 83.1, 126.5, 127.5, 128.6, 137.6, 180.6; IR (neat): 3405, 2932, 1771, 1230, 1033, 700 cm<sup>-1</sup>; HRMS (ESI): *m/z* calcd for C<sub>16</sub>H<sub>22</sub>O<sub>3</sub> [M+Na]<sup>+</sup> 285.1461. Found 285.1468; [ $\alpha$ ]<sub>D</sub><sup>20</sup> = 45.4 (*c* = 1.59, CHCl<sub>3</sub>).

### Procedure for preparation of (3*S*,4*S*,5*R*)-3a

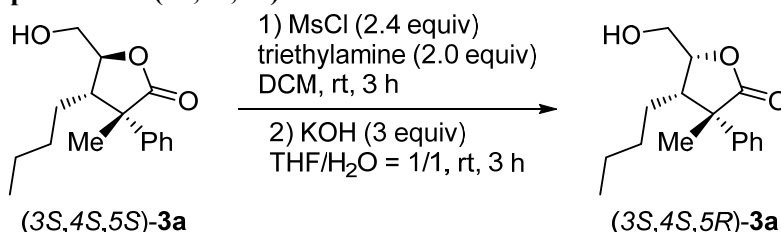

To a solution of (3*S*,4*S*,5*S*)-**3a** (20.2 mg, 0.077 mmol, 1 equiv) and methanesulfonyl chloride (14.4  $\mu$ L, 0.185 mmol, 2.4 equiv) in DCM (0.4 mL), triethylamine (21.5  $\mu$ L, 0.154 mmol, 2.0 equiv) was added at 0 °C and the reaction mixture was stirred at room temperature for 3 h. The reaction was quenched with saturated NaHCO<sub>3</sub> aq. and products were extracted with EtOAc three times. The organic layer was dried over Na<sub>2</sub>SO<sub>4</sub>, filtered and concentrated under reduced pressure to afford the crude product. The crude product was purified by column chromatography (hexane/EtOAc) to afford mesylated product.

To a solution of mesylated product (0.077 mmol, 1 equiv) in THF (0.25 mL) and H<sub>2</sub>O (0.25 mL), KOH (13.0 mg, 0.231 mmol, 3.0 equiv) was added at 0 °C and the reaction mixture was stirred at room temperature for 3 h. The reaction was quenched with aqueous HCl (1M) and products were extracted with EtOAc three times. The organic layer was dried over Na<sub>2</sub>SO<sub>4</sub>, filtered and concentrated under reduced pressure to afford the crude product. Diastereomeric ratio was determined by <sup>1</sup>H NMR analysis (10/1 dr).

The crude product was purified by column chromatography (DCM/EtOAc). (3*S*,4*S*,5*R*)-**3a** was obtained as a colorless oil (18.6 mg, 92%).

(3*S*,4*S*,5*R*)-4-butyl-5-(hydroxymethyl)-3-methyl-3-phenyldihydrofuran-2(3H)-one ((3*S*,4*S*,5*R*)-**3a**)

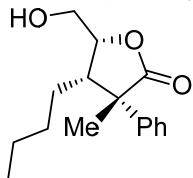

<sup>1</sup>H NMR (500 MHz, CDCl<sub>3</sub>): δ = 0.85 (t, *J* = 7.2 Hz, 3H), 1.22-1.30 (m, 5H), 1.44-1.50 (m, 1H), 1.65 (s, 3H), 2.60-2.64 (m, 1H), 3.44-3.46 (m, 1H), 3.60 (dd, *J* = 12.6, 9.7 Hz, 1H), 4.68-4.73 (m, 1H), 7.22-7.24 (m, 2H), 7.27-7.35 (m, 3H); <sup>13</sup>C NMR (125 MHz, CDCl<sub>3</sub>): δ = 13.8, 22.8, 26.0, 26.1, 30.0, 49.2, 51.0, 61.5, 81.7, 127.4, 127.4, 128.4, 139.1, 180.3; IR (neat): 3409, 2932, 1769, 1383, 1069, 704 cm<sup>-1</sup>; HRMS (ESI): *m/z* calcd for C<sub>16</sub>H<sub>22</sub>O<sub>3</sub> [M+Na]<sup>+</sup> 285.1461. Found 285.1468; [α]<sub>D</sub><sup>20</sup> = -74.9 (*c* = 1.50, CHCl<sub>3</sub>).

#### Procedure for preparation of (3*R*,4*S*,5*S*)-**3a**

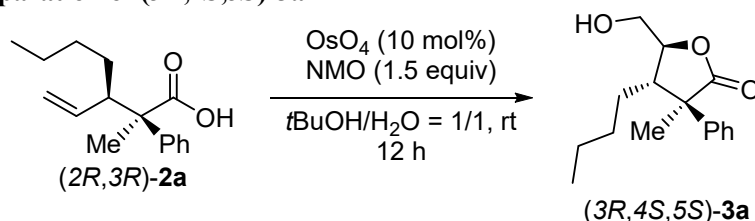

To a solution of (2*R*,3*R*)-**2a** (26.8 mg, 0.109 mmol, 1 equiv) and *N*-methylmorpholine (19.1 mg, 0.163 mmol, 1.5 equiv) in *t*BuOH (0.55 mL) and H<sub>2</sub>O (0.7 mL), OsO<sub>4</sub> (142 μL, 10.9 μmol, 10 mol%, 2.5 w% in *t*BuOH) was added at rt and the reaction mixture was stirred for 12 h. The reaction was diluted with H<sub>2</sub>O and EtOAc and products were extracted with EtOAc three times. The organic layer was dried over Na<sub>2</sub>SO<sub>4</sub>, filtered and concentrated under reduced pressure to afford the crude product. Diastereomeric ratio was determined by <sup>1</sup>H NMR analysis (>50/1 dr). The crude product was purified by column chromatography (hexane/EtOAc). (3*R*,4*S*,5*S*)-**3a** was obtained as a colorless oil (28.1 mg, 92%).

(3*R*,4*S*,5*S*)-4-butyl-5-(hydroxymethyl)-3-methyl-3-phenyldihydrofuran-2(3H)-one ((3*R*,4*S*,5*S*)-**3a**)

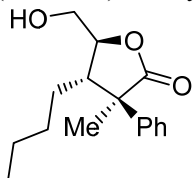

<sup>1</sup>H NMR (400 MHz, CDCl<sub>3</sub>): δ = 0.77 (t, *J* = 7.3 Hz, 3H), 1.09-1.18 (m, 4H), 1.40-1.52 (m, 2H), 1.58 (s, 3H), 2.68-2.74 (m, 1H), 3.69-3.75 (m, 1H), 4.04-4.07 (m, 1H), 4.26-4.29 (m, 1H), 7.28-7.38 (m, 5H); <sup>13</sup>C NMR (100 MHz, CDCl<sub>3</sub>): δ = 13.6, 16.4, 22.6, 26.8, 29.4, 47.5, 51.6, 62.5, 83.4, 126.7, 127.2, 128.5, 142.0, 180.7; IR (neat): 3396, 2926, 1761, 1383, 1093, 700 cm<sup>-1</sup>; HRMS (ESI): *m/z* calcd for C<sub>16</sub>H<sub>22</sub>O<sub>3</sub> [M+Na]<sup>+</sup> 285.1461. Found 285.1460; [α]<sub>D</sub><sup>20</sup> = 51.1 (*c* = 0.69, CHCl<sub>3</sub>).

#### Procedure for preparation of (3*R*,4*S*,5*R*)-**3a**

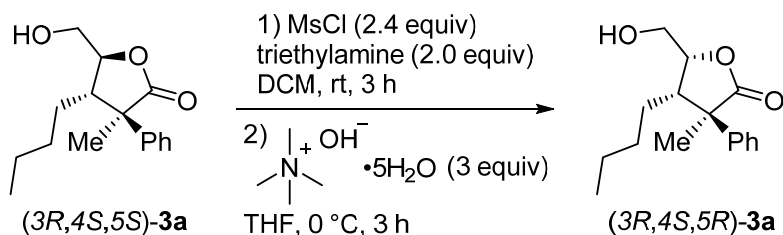

To a solution of  $(3R,4S,5S)\text{-}\mathbf{3a}$  (31.0 mg, 0.118 mmol, 1 equiv) and methanesulfonyl chloride (22.1  $\mu\text{L}$ , 0.284 mmol, 2.4 equiv) in DCM (1.0 mL), triethylamine (32.9  $\mu\text{L}$ , 0.236 mmol, 2.0 equiv) was added at 0  $^{\circ}\text{C}$  and the reaction mixture was stirred at room temperature for 3 h. The reaction was quenched with saturated  $\text{NaHCO}_3$  aq. and products were extracted with EtOAc three times. The organic layer was dried over  $\text{Na}_2\text{SO}_4$ , filtered and concentrated under reduced pressure to afford the crude product. The crude product was purified by column chromatography (hexane/EtOAc) to afford mesylated product as a colorless oil (40.2 mg, 100%).

To a solution of mesylated product (8.1 mg, 0.024 mmol, 1 equiv) in THF (0.25 mL), tetramethylammonium hydroxide pentahydrate (12.9 mg, 0.714 mmol, 3.0 equiv) was added at 0  $^{\circ}\text{C}$  and the reaction mixture was stirred at 0  $^{\circ}\text{C}$  for 3 h. The reaction was quenched with aqueous HCl (1M) and products were extracted with EtOAc three times. The organic layer was dried over  $\text{Na}_2\text{SO}_4$ , filtered and concentrated under reduced pressure to afford the crude product. Diastereomeric ratio was determined by  $^1\text{H}$  NMR analysis (6.4/1 dr). The crude product was purified by column chromatography (DCM/EtOAc).  $(3R,4S,5R)\text{-}\mathbf{3a}$  was obtained as a colorless oil (4.35 mg, 70%).

$(3R,4S,5R)\text{-}4\text{-butyl-5-(hydroxymethyl)-3-methyl-3-phenyldihydrofuran-2(3H)-one}$  ( $(3R,4S,5R)\text{-}\mathbf{3a}$ )

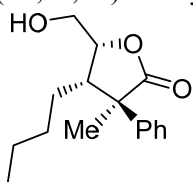

$^1\text{H}$  NMR (500 MHz,  $\text{CDCl}_3$ ):  $\delta$  = 0.87 (t,  $J$  = 7.2 Hz, 3H), 1.25-1.29 (m, 6H), 1.57 (s, 3H), 2.78-2.82 (m, 1H), 3.83-3.85 (m, 1H), 3.89-3.93 (m, 1H), 4.58-4.62 (m, 1H), 7.27-7.38 (m, 5H);  $^{13}\text{C}$  NMR (125 MHz,  $\text{CDCl}_3$ ):  $\delta$  = 13.8, 19.8, 22.9, 24.7, 30.2, 49.2, 51.7, 62.3, 81.1, 126.1, 127.3, 128.8, 143.2, 180.4; IR (neat): 3374, 2926, 1769, 1652, 1092, 700  $\text{cm}^{-1}$ ; HRMS (ESI):  $m/z$  calcd for  $\text{C}_{16}\text{H}_{22}\text{O}_3$   $[\text{M}+\text{Na}]^+$  285.1461. Found 285.1460;  $[\alpha]_{\text{D}}^{20}$  = -3.91 ( $c$  = 0.44,  $\text{CHCl}_3$ ).

#### Determination of relative configuration of $\mathbf{3a}$

The relative configurations of  $\mathbf{3a}$  were determined by  $^1\text{H}$  NOE analysis. The results indicated that the proton  $\text{H}_A$  was located close to the proton  $\text{H}_B$  (*syn*-configuration) in the case of  $(3S,4S,5R)\text{-}\mathbf{3a}$  and  $(3R,4S,5R)\text{-}\mathbf{3a}$ .

C:\Users\valice\Desktop\Gousei\mitsunuma\note\carboxylic acid\hmC170tm NOE1-2-1-1.als

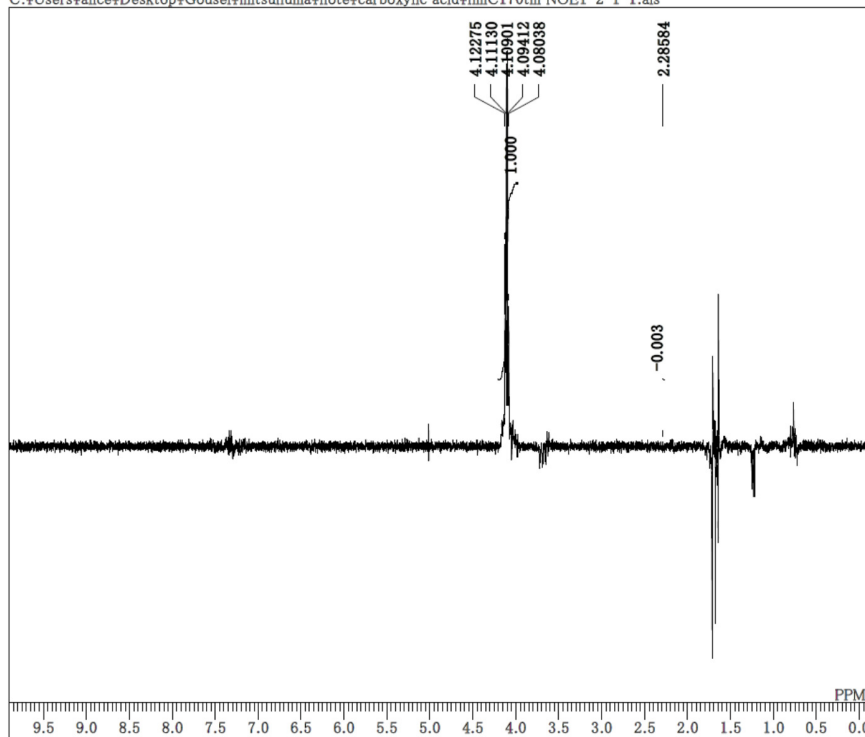

DFILE hmC170tm NOE1-2-1-1.als  
 COMNT  
 DATIM 2020-11-07 18:53:18  
 OBNUC 1H  
 EXMOD noe\_1d\_dpfgse\_zq  
 OBFRQ 500.16 MHz  
 OBSET 2.41 KHz  
 OBFIN 6.01 Hz  
 POINT 13107  
 FREQU 7507.51 Hz  
 SCANS 100  
 ACQTM 1.7459 sec  
 PD 7.0000 sec  
 PW1 11.10 usec  
 IRNUC 1H  
 CTEMP 21.9 c  
 SLVNT CDCL3  
 EXREF 7.24 ppm  
 BF 0.12 Hz  
 RGAIN 36

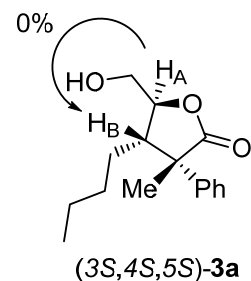

I:\Chen\20210316\hmC167tm NOE1-1-1.als

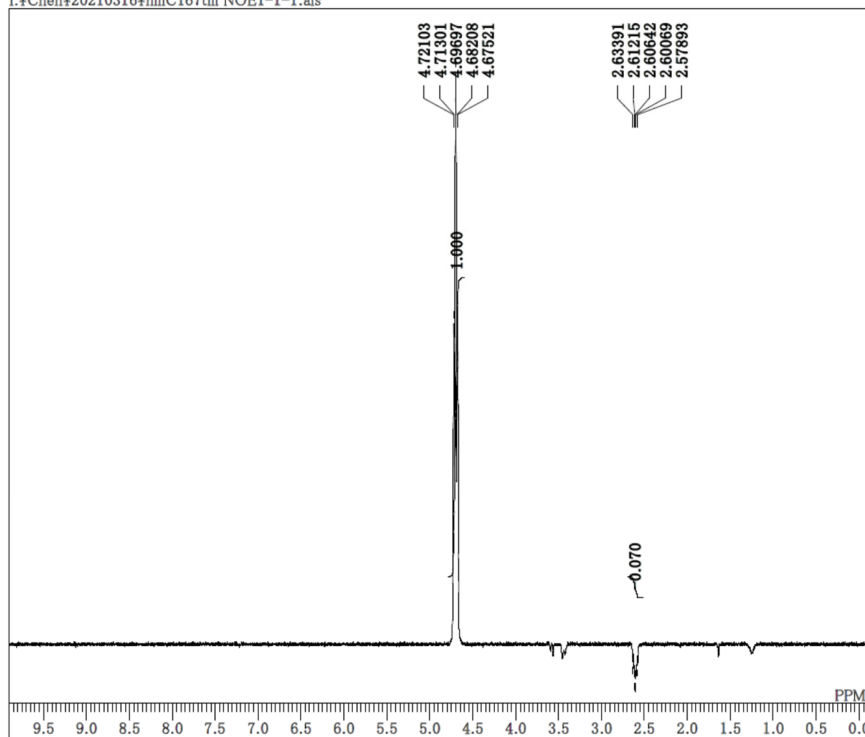

DFILE hmC167tm NOE1-1-1.als  
 COMNT  
 DATIM 07-11-2020 23:28:47  
 OBNUC 1H  
 EXMOD noe\_1d\_dpfgse\_jx  
 OBFRQ 391.78 MHz  
 OBSET 8.51 KHz  
 OBFIN 3.34 Hz  
 POINT 13107  
 FREQU 5882.35 Hz  
 SCANS 48  
 ACQTM 2.2282 sec  
 PD 7.0000 sec  
 PW1 10.34 usec  
 IRNUC 1H  
 CTEMP 20.8 c  
 SLVNT CDCL3  
 EXREF 7.24 ppm  
 BF 0.12 Hz  
 RGAIN 52

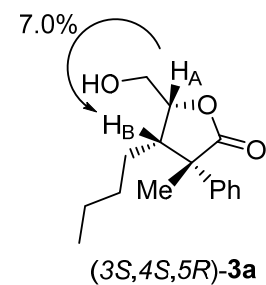

C:\Users\alice\Desktop\Gousei\mitsunuma\note\carboxylic acid\hmC160tm NOE1-1-1.als

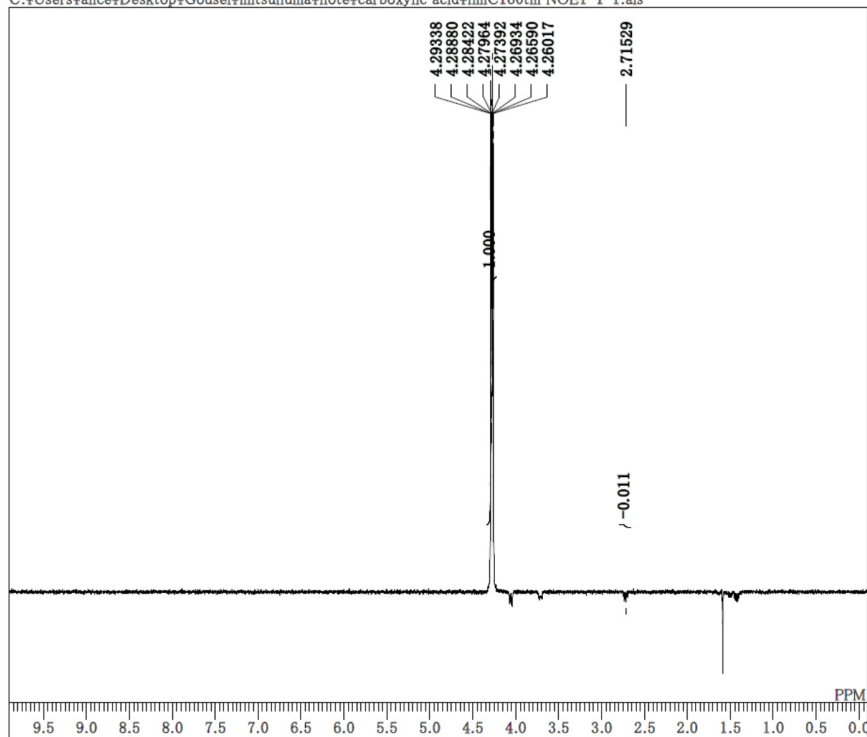

DFILE hmC160tm NOE1-1-1.als  
 COMNT  
 DATIM 2020-11-07 21:31:15  
 OBNUC 1H  
 EXMOD noe\_1d\_dpfgse\_zq  
 OBFRQ 500.16 MHz  
 OBSET 2.41 KHz  
 OBFIN 6.01 Hz  
 POINT 13107  
 FREQU 7507.51 Hz  
 SCANS 100  
 ACQTM 1.7459 sec  
 PD 7.0000 sec  
 PW1 11.10 usec  
 IRNUC 1H  
 CTEMP 21.9 c  
 SLVNT CDCL3  
 EXREF 7.24 ppm  
 BF 0.12 Hz  
 RGAIN 38

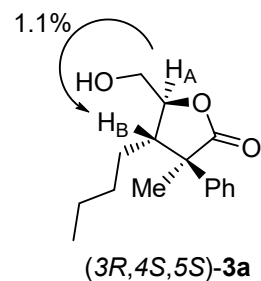

C:\Users\alice\Desktop\Gousei\mitsunuma\note\carboxylic acid\hmC175-3tm NOE1-1-1.als

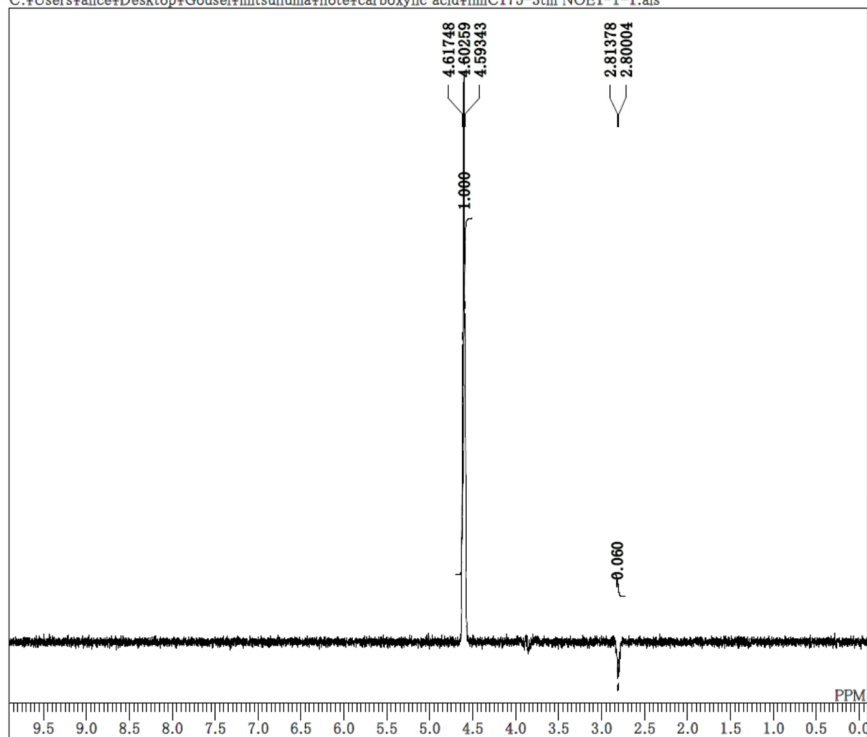

DFILE hmC175-3tm NOE1-1-1.als  
 COMNT  
 DATIM 2020-11-07 20:22:52  
 OBNUC 1H  
 EXMOD noe\_1d\_dpfgse\_zq  
 OBFRQ 500.16 MHz  
 OBSET 2.41 KHz  
 OBFIN 6.01 Hz  
 POINT 13107  
 FREQU 7507.51 Hz  
 SCANS 100  
 ACQTM 1.7459 sec  
 PD 7.0000 sec  
 PW1 11.10 usec  
 IRNUC 1H  
 CTEMP 22.1 c  
 SLVNT CDCL3  
 EXREF 7.24 ppm  
 BF 0.12 Hz  
 RGAIN 38

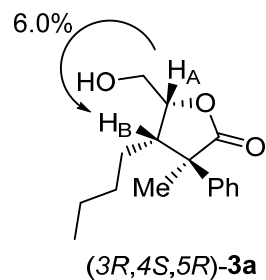



## 7. Initial Screening Results

### Screening of phosphoramidite ligand

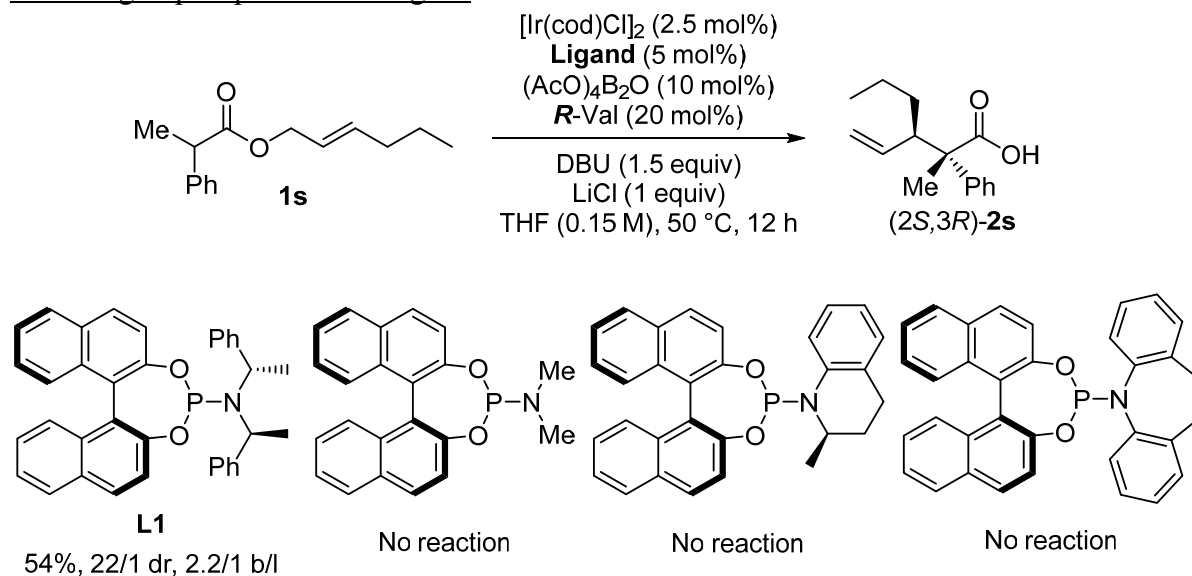

### Screening of boron ligand

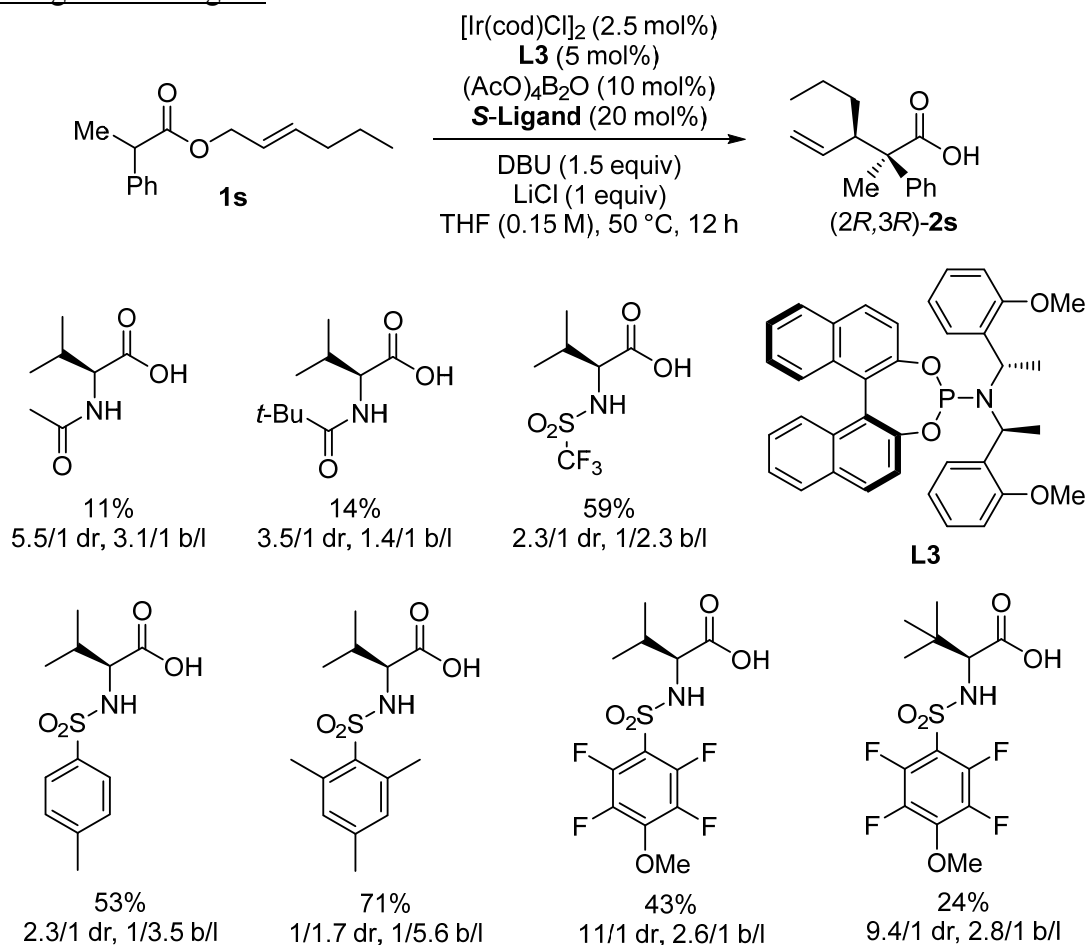

### Screening of base

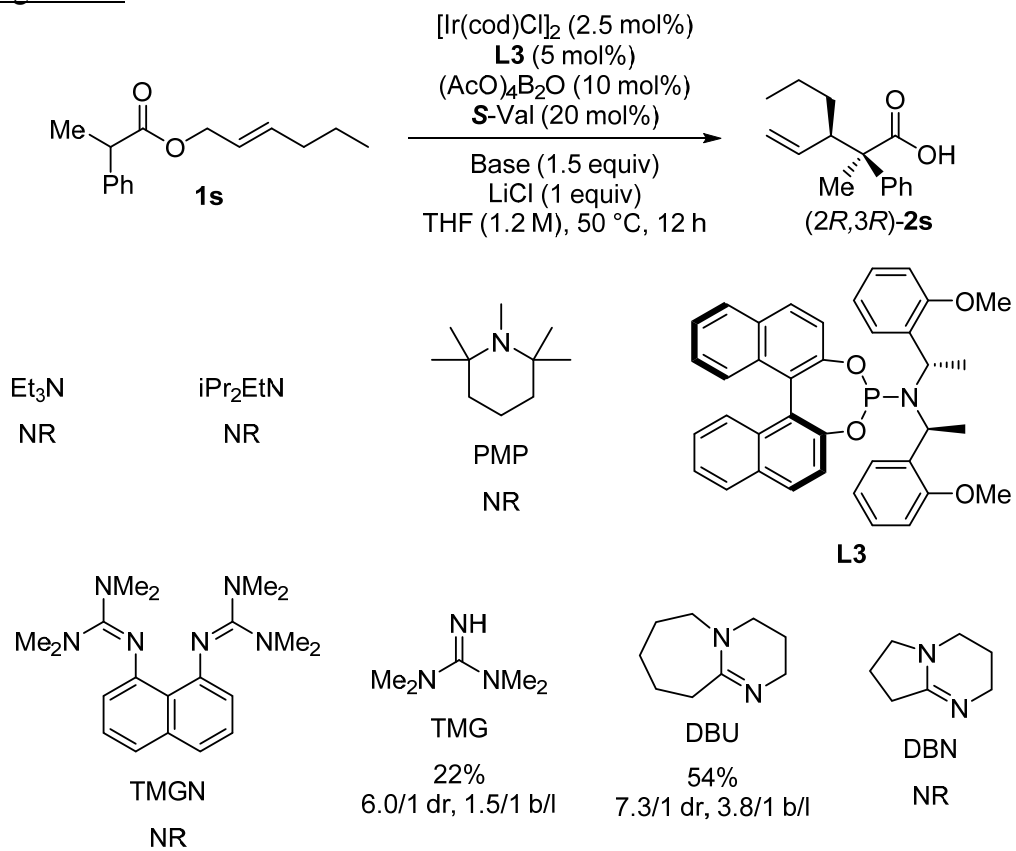

Screening of activation method

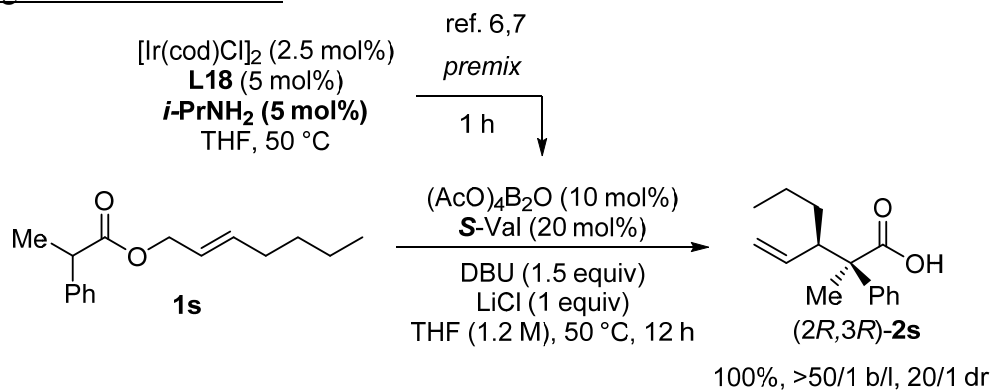

## 8. Limitations

### Application to cinnamyl 2-phenylpropanoate (**1ae**)

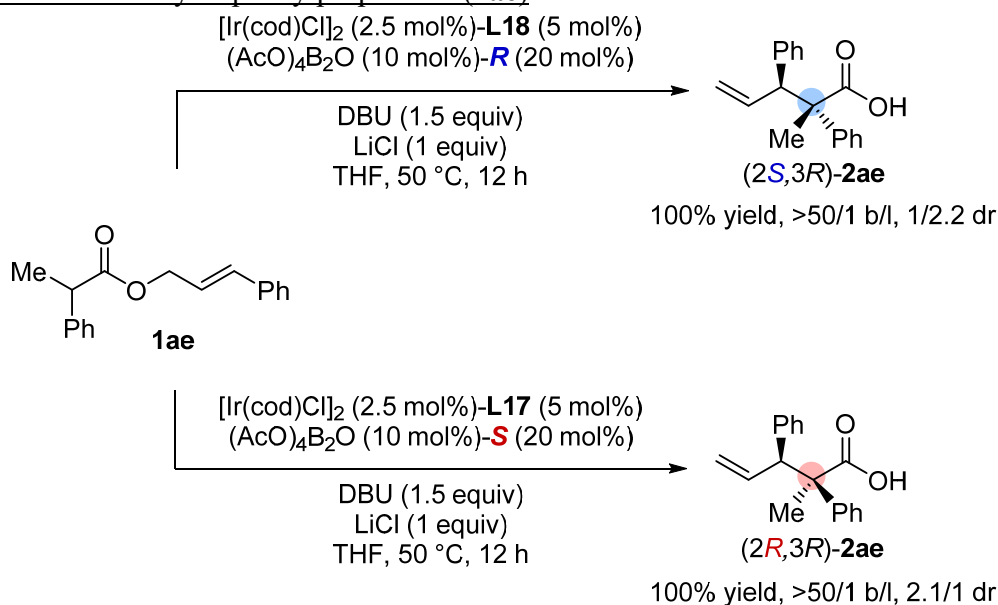

The current optimized condition could not be applied to the stereodivergent synthesis of  $\beta$ -aryl substituted carboxylic acid.

### Application to (*E*)-hept-2-en-1-yl 2-methyl-3-phenylpropanoate (**1af**)

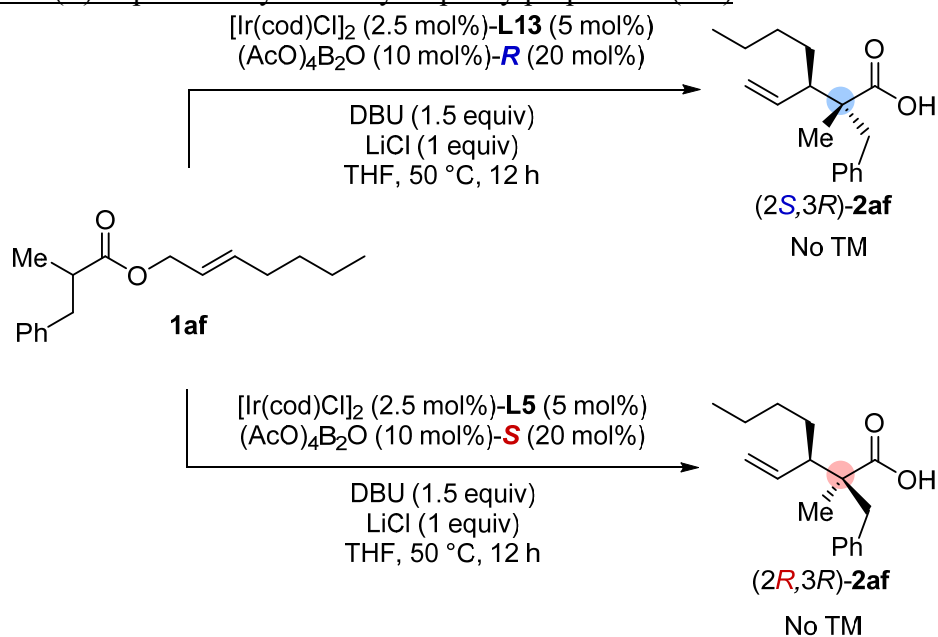

Application to (*E*)-hept-2-en-1-yl 2-(4-methoxyphenyl)-2-phenylacetate (**1ag**)

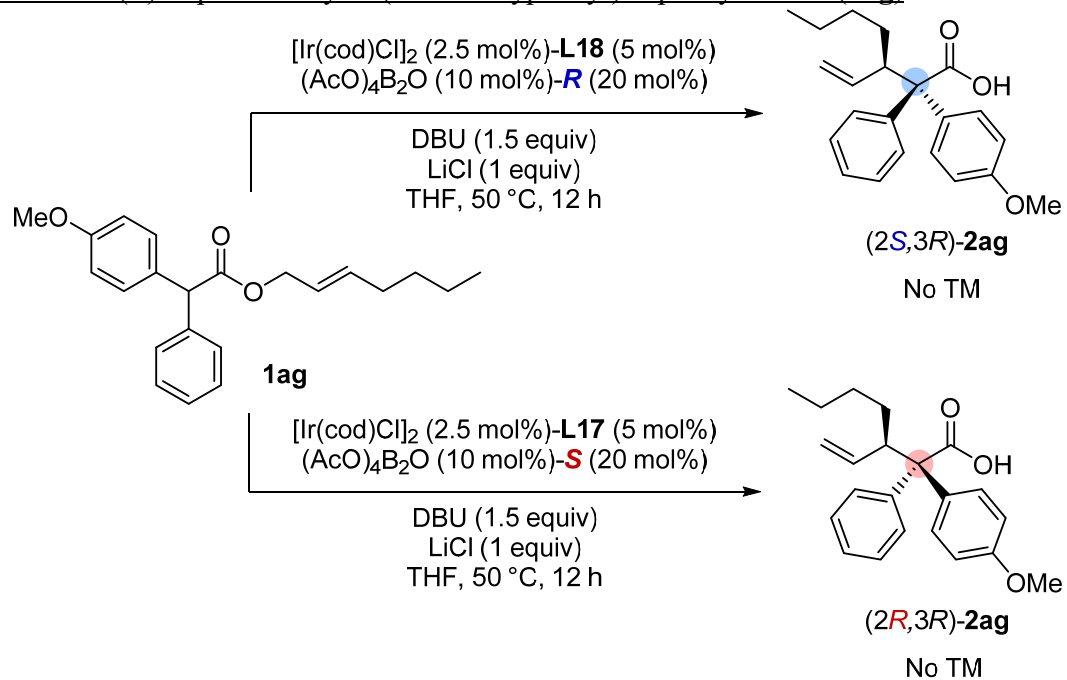

## 9. Control Experiment using Carreira's Reaction Conditions

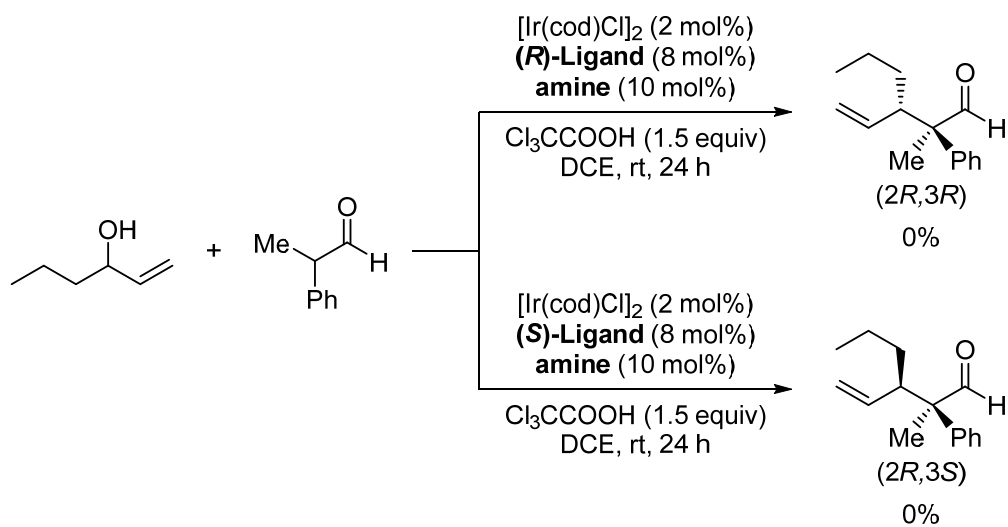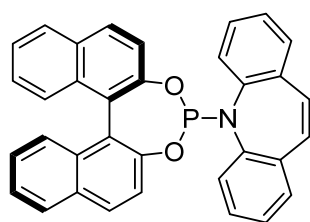

**(R)-Ligand**

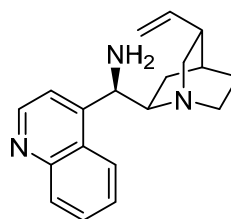

**amine**

## 10. Dataset

All the experiment was conducted twice under the same condition in S3. Yield, diastereomeric ratio (dr) and branch/linear (b/l) selectivity were determined by  $^1\text{H}$  NMR analysis of crude mixture using 1,1,2,2-tetrachloroethane (10.0  $\mu\text{L}$ , 0.0953 mmol) as an internal standard. Enantiomeric excess (ee) was determined by HPLC analysis. The  $^1\text{H}$  NMR peaks of linear-**2Pr** were determined by reported spectra (Ref. 34 in main text). Linear-**2Et** was synthesized according to a related procedure (Ref. 34 in main text). All the crude NMR charts are listed in Chapter 11. **NMR Charts**. For Tables of the dataset, please see from the next page.

(*E*)-2-methyl-2-phenylhept-4-enoic acid

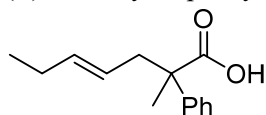

$^1\text{H}$  NMR (500 MHz,  $\text{CDCl}_3$ ):  $\delta$  = 0.91 (t,  $J$  = 7.4 Hz, 3H), 1.54 (s, 3H), 1.96 (dq,  $J$  = 7.0, 7.1 Hz, 2H), 2.59 (dd,  $J$  = 13.7, 7.4 Hz, 1H), 2.77 (dd,  $J$  = 13.7, 7.4 Hz, 1H), 5.24 (dt,  $J$  = 15.2, 7.1 Hz, 1H), 5.52 (dt,  $J$  = 15.2, 7.4 Hz, 1H), 7.25-7.39 (m, 5H).; IR (neat): 2962, 1700, 1277, 971, 697  $\text{cm}^{-1}$ ; HRMS (ESI):  $m/z$  calcd for  $\text{C}_{14}\text{H}_{18}\text{O}_2$   $[\text{M}-\text{H}+2\text{Na}]^+$  263.1018. Found 263.1012.

**Table S1. Phosphoramidite ligands used in this study and experimental results.** Ar = 2-MeOC<sub>6</sub>H<sub>4</sub>.

Reaction conditions: [Ir(cod)Cl]<sub>2</sub> (2.5 mol% Ir), phosphoramidite ligand (5 mol%), (AcO)<sub>4</sub>B<sub>2</sub>O (10 mol%), *S* (20 mol%), DBU (1.5 equiv), LiCl (1.0 equiv), THF, 50 °C, 12 h. Each reaction was performed twice. Average values of selectivity data in the 1st and 2nd reactions were used for the MFA.

|                                                                                                                                                                                                                                                         |                                                                                                                                                                                                                                                           |                                                                                                                                                                                                                                                                       |                 |
|---------------------------------------------------------------------------------------------------------------------------------------------------------------------------------------------------------------------------------------------------------|-----------------------------------------------------------------------------------------------------------------------------------------------------------------------------------------------------------------------------------------------------------|-----------------------------------------------------------------------------------------------------------------------------------------------------------------------------------------------------------------------------------------------------------------------|-----------------|
| <p>1Et (R = Et)<br/>1Pr (R = Pr)</p> <p>2Et (R = Et)<br/>2Pr (R = Pr)</p>                                                                                                                                                                               |                                                                                                                                                                                                                                                           |                                                                                                                                                                                                                                                                       | <p><b>S</b></p> |
| <p><b>L1</b></p> <p>2Et <b>1st</b>. 1.7/1 b/l, 1.9/1 dr, 77% yield, 98% ee<br/><b>2nd</b>. 1.7/1 b/l, 1.9/1 dr, 70% yield, 98% ee<br/>2Pr <b>1st</b>. 1.2/1 b/l, 2.8/1 dr, 87% yield, 97% ee<br/><b>2nd</b>. 1.2/1 b/l, 2.8/1 dr, 77% yield, 99% ee</p> | <p><b>L7</b></p> <p>2Et <b>1st</b>. 1.1/1 b/l, 1.1/1 dr, 84% yield, 90% ee<br/><b>2nd</b>. 1.1/1 b/l, 1.0/1 dr, 83% yield, 90% ee<br/>2Pr <b>1st</b>. 1/1.2 b/l, 1.4/1 dr, 83% yield, 95% ee<br/><b>2nd</b>. 1/1.2 b/l, 1.3/1 dr, 72% yield, 93% ee</p>   | <p><b>L13</b></p> <p>2Et <b>1st</b>. 2.8/1 b/l, 1.7/1 dr, 68% yield, 99% ee<br/><b>2nd</b>. 3.3/1 b/l, 2.0/1 dr, 67% yield, 97% ee<br/>2Pr <b>1st</b>. 4.0/1 b/l, 2.9/1 dr, 65% yield, 99% ee<br/><b>2nd</b>. 4.6/1 b/l, 3.2/1 dr, 70% yield, 99% ee</p>              |                 |
| <p><b>L2</b></p> <p>2Et <b>1st</b>. 1.9/1 b/l, 2.3/1 dr, 73% yield, 99% ee<br/><b>2nd</b>. 1.8/1 b/l, 2.3/1 dr, 57% yield, 99% ee<br/>2Pr <b>1st</b>. 1.3/1 b/l, 3.2/1 dr, 81% yield, 99% ee<br/><b>2nd</b>. 1.4/1 b/l, 3.3/1 dr, 65% yield, 99% ee</p> | <p><b>L8</b></p> <p>2Et <b>1st</b>. 1.2/1 b/l, 1.4/1 dr, 78% yield, 92% ee<br/><b>2nd</b>. 1.3/1 b/l, 1.5/1 dr, 90% yield, 92% ee<br/>2Pr <b>1st</b>. 1/1.3 b/l, 1.8/1 dr, 91% yield, 94% ee<br/><b>2nd</b>. 1/1.2 b/l, 1.7/1 dr, 70% yield, 93% ee</p>   | <p><b>L14</b></p> <p>2Et <b>1st</b>. 5.8/1 b/l, 2.9/1 dr, 56% yield, 99% ee<br/><b>2nd</b>. 5.9/1 b/l, 3.1/1 dr, 65% yield, 99% ee<br/>2Pr <b>1st</b>. 11/1 b/l, 6.5/1 dr, 65% yield, 99% ee<br/><b>2nd</b>. 12/1 b/l, 6.5/1 dr, 64% yield, 99% ee</p>                |                 |
| <p><b>L3</b></p> <p>2Et <b>1st</b>. 5.0/1 b/l, 4.5/1 dr, 50% yield, 99% ee<br/><b>2nd</b>. 5.0/1 b/l, 4.9/1 dr, 66% yield, 99% ee<br/>2Pr <b>1st</b>. 3.8/1 b/l, 7.3/1 dr, 54% yield, 99% ee<br/><b>2nd</b>. 4.0/1 b/l, 7.6/1 dr, 69% yield, 99% ee</p> | <p><b>L9</b></p> <p>2Et <b>1st</b>. 1.1/1 b/l, 1/1.1 dr, 83% yield, 91% ee<br/><b>2nd</b>. 1.2/1 b/l, 1/1.1 dr, 73% yield, 92% ee<br/>2Pr <b>1st</b>. 1/1.2 b/l, 1.2/1 dr, 95% yield, 93% ee<br/><b>2nd</b>. 1/1.2 b/l, 1.2/1 dr, 81% yield, 92% ee</p>   | <p><b>L15</b></p> <p>2Et <b>1st</b>. 22.4/1 b/l, 3.9/1 dr, 44% yield, 99% ee<br/><b>2nd</b>. 11.4/1 b/l, 3.1/1 dr, 60% yield, 99% ee<br/>2Pr <b>1st</b>. 15.2/1 b/l, 4.3/1 dr, 73% yield, 99% ee<br/><b>2nd</b>. 20.2/1 b/l, 4.4/1 dr, 60% yield, 99% ee</p>          |                 |
| <p><b>L4</b></p> <p>2Et <b>1st</b>. 4.0/1 b/l, 4.6/1 dr, 57% yield, 99% ee<br/><b>2nd</b>. 4.7/1 b/l, 4.6/1 dr, 59% yield, 99% ee<br/>2Pr <b>1st</b>. 3.2/1 b/l, 8.6/1 dr, 47% yield, 99% ee<br/><b>2nd</b>. 3.5/1 b/l, 8.3/1 dr, 46% yield, 99% ee</p> | <p><b>L10</b></p> <p>2Et <b>1st</b>. 1.3/1 b/l, 1.1/1 dr, 88% yield, 91% ee<br/><b>2nd</b>. 1.2/1 b/l, 1.1/1 dr, 78% yield, 92% ee<br/>2Pr <b>1st</b>. 1/1.3 b/l, 1.5/1 dr, 93% yield, 94% ee<br/><b>2nd</b>. 1/1.1 b/l, 1.6/1 dr, 83% yield, 93% ee</p>  | <p><b>L16</b></p> <p>2Et <b>1st</b>. &gt;50/1 b/l, 4.5/1 dr, 56% yield, 99% ee<br/><b>2nd</b>. &gt;50/1 b/l, 5.4/1 dr, 52% yield, 99% ee<br/>2Pr <b>1st</b>. &gt;50/1 b/l, 9.4/1 dr, 51% yield, 99% ee<br/><b>2nd</b>. &gt;50/1 b/l, 10.1/1 dr, 68% yield, 99% ee</p> |                 |
| <p><b>L5</b></p> <p>2Et <b>1st</b>. 4.4/1 b/l, 1.1/1 dr, 68% yield, 99% ee<br/><b>2nd</b>. 4.6/1 b/l, 1.1/1 dr, 75% yield, 99% ee<br/>2Pr <b>1st</b>. 3.7/1 b/l, 1.7/1 dr, 66% yield, 99% ee<br/><b>2nd</b>. 4.0/1 b/l, 1.8/1 dr, 63% yield, 99% ee</p> | <p><b>L11</b></p> <p>2Et <b>1st</b>. 1.2/1 b/l, 1/1.1 dr, 100% yield, 91% ee<br/><b>2nd</b>. 1.2/1 b/l, 1/1.1 dr, 91% yield, 89% ee<br/>2Pr <b>1st</b>. 1/1.2 b/l, 1.2/1 dr, 96% yield, 93% ee<br/><b>2nd</b>. 1/1.2 b/l, 1.2/1 dr, 84% yield, 91% ee</p> | <p><b>L17</b></p> <p>2Et <b>1st</b>. 17/1 b/l, 12.5/1 dr, 72% yield, 99% ee<br/><b>2nd</b>. 22/1 b/l, 14.5/1 dr, 73% yield, 99% ee<br/>2Pr <b>1st</b>. &gt;50/1 b/l, 56.4/1 dr, 84% yield, 99% ee<br/><b>2nd</b>. &gt;50/1 b/l, 23.3/1 dr, 56% yield, 99% ee</p>      |                 |
| <p><b>L6</b></p> <p>2Et <b>1st</b>. 3.9/1 b/l, 1.0/1 dr, 72% yield, 99% ee<br/><b>2nd</b>. 3.6/1 b/l, 1.1/1 dr, 83% yield, 99% ee<br/>2Pr <b>1st</b>. 3.4/1 b/l, 1.7/1 dr, 87% yield, 98% ee<br/><b>2nd</b>. 3.5/1 b/l, 1.6/1 dr, 82% yield, 99% ee</p> | <p><b>L12</b></p> <p>2Et <b>1st</b>. 1.2/1 b/l, 1.1/1 dr, 84% yield, 91% ee<br/><b>2nd</b>. 1.2/1 b/l, 1.2/1 dr, 80% yield, 91% ee<br/>2Pr <b>1st</b>. 1/1.3 b/l, 1.5/1 dr, 85% yield, 91% ee<br/><b>2nd</b>. 1/1.2 b/l, 1.6/1 dr, 85% yield, 94% ee</p>  | <p><b>L18</b></p> <p>2Et <b>1st</b>. &gt;50/1 b/l, 2.8/1 dr, 55% yield, 99% ee<br/><b>2nd</b>. &gt;50/1 b/l, 2.7/1 dr, 55% yield, 99% ee<br/>2Pr <b>1st</b>. &gt;50/1 b/l, 6.3/1 dr, 57% yield, 99% ee<br/><b>2nd</b>. &gt;50/1 b/l, 7.2/1 dr, 67% yield, 99% ee</p>  |                 |



**Table S2. Phosphoramidite ligands used in this study and experimental results.** Ar = 2-MeOC<sub>6</sub>H<sub>4</sub>.

Reaction conditions: [Ir(cod)Cl]<sub>2</sub> (2.5 mol% Ir), phosphoramidite ligand (5 mol%), (AcO)<sub>4</sub>B<sub>2</sub>O (10 mol%), **R** (20 mol%), DBU (1.5 equiv), LiCl (1.0 equiv), THF, 50 °C, 12 h. Each reaction was performed twice. Average values of selectivity data in the 1st and 2nd reactions were used for the MFA.

|                                                                                                                                                                                                                                                                                |                                                                                                                                                                                                                                                                               |                                                                                                                                                                                                                                                                                              |
|--------------------------------------------------------------------------------------------------------------------------------------------------------------------------------------------------------------------------------------------------------------------------------|-------------------------------------------------------------------------------------------------------------------------------------------------------------------------------------------------------------------------------------------------------------------------------|----------------------------------------------------------------------------------------------------------------------------------------------------------------------------------------------------------------------------------------------------------------------------------------------|
| <p>1Et (R = Et)<br/>1Pr (R = Pr)</p> <p>2Et (R = Et)<br/>2Pr (R = Pr)</p> <p><b>R</b></p>                                                                                                                                                                                      |                                                                                                                                                                                                                                                                               |                                                                                                                                                                                                                                                                                              |
| <p><b>L1</b></p> <p>2Et <b>1st</b>. 2.0/1 b/l, 5.2/1 dr, 94% yield, 97% ee<br/> <b>2nd</b>. 2.1/1 b/l, 6.5/1 dr, 85% yield, 97% ee<br/>                 2Pr <b>1st</b>. 2.4/1 b/l, 9.6/1 dr, 100% yield, 99% ee<br/> <b>2nd</b>. 2.7/1 b/l, 10.0/1 dr, 77% yield, 97% ee</p>   | <p><b>L7</b></p> <p>2Et <b>1st</b>. 1.1/5 b/l, 3.2/1 dr, 87% yield, 92% ee<br/> <b>2nd</b>. 1.1/6 b/l, 3.5/1 dr, 68% yield, 92% ee<br/>                 2Pr <b>1st</b>. 1.1/5 b/l, 4.6/1 dr, 82% yield, 93% ee<br/> <b>2nd</b>. 1.1/4 b/l, 5.1/1 dr, 66% yield, 93% ee</p>    | <p><b>L13</b></p> <p>2Et <b>1st</b>. 4.1/1 b/l, 9.9/1 dr, 89% yield, 98% ee<br/> <b>2nd</b>. 4.7/1 b/l, 8.5/1 dr, 80% yield, 98% ee<br/>                 2Pr <b>1st</b>. 9.9/1 b/l, 10.0/1 dr, 81% yield, 99% ee<br/> <b>2nd</b>. 7.5/1 b/l, 9.8/1 dr, 64% yield, 99% ee</p>                 |
| <p><b>L2</b></p> <p>2Et <b>1st</b>. 2.4/1 b/l, 6.1/1 dr, 97% yield, 98% ee<br/> <b>2nd</b>. 2.5/1 b/l, 7.4/1 dr, 76% yield, 97% ee<br/>                 2Pr <b>1st</b>. 2.6/1 b/l, 11.3/1 dr, 100% yield, 98% ee<br/> <b>2nd</b>. 2.7/1 b/l, 14.1/1 dr, 94% yield, 99% ee</p>  | <p><b>L8</b></p> <p>2Et <b>1st</b>. 1.0/1 b/l, 3.6/1 dr, 87% yield, 95% ee<br/> <b>2nd</b>. 1.1/1 b/l, 2.5/1 dr, 98% yield, 94% ee<br/>                 2Pr <b>1st</b>. 1/1.1 b/l, 6.2/1 dr, 98% yield, 95% ee<br/> <b>2nd</b>. 1/1.0 b/l, 7.5/1 dr, 86% yield, 95% ee</p>    | <p><b>L14</b></p> <p>2Et <b>1st</b>. 11.0/1 b/l, 13.1/1 dr, 77% yield, 99% ee<br/> <b>2nd</b>. 10.7/1 b/l, 10.6/1 dr, 93% yield, 99% ee<br/>                 2Pr <b>1st</b>. &gt;50/1 b/l, 15.2/1 dr, 80% yield, 99% ee<br/> <b>2nd</b>. &gt;50/1 b/l, 14.9/1 dr, 88% yield, 99% ee</p>      |
| <p><b>L3</b></p> <p>2Et <b>1st</b>. 4.6/1 b/l, 6.7/1 dr, 70% yield, 99% ee<br/> <b>2nd</b>. 5.3/1 b/l, 6.0/1 dr, 74% yield, 98% ee<br/>                 2Pr <b>1st</b>. 4.5/1 b/l, 10.4/1 dr, 65% yield, 99% ee<br/> <b>2nd</b>. 4.8/1 b/l, 9.8/1 dr, 85% yield, 98% ee</p>    | <p><b>L9</b></p> <p>2Et <b>1st</b>. 1/1.5 b/l, 2.7/1 dr, 83% yield, 93% ee<br/> <b>2nd</b>. 1/1.6 b/l, 4.0/1 dr, 84% yield, 93% ee<br/>                 2Pr <b>1st</b>. 1/1.5 b/l, 4.6/1 dr, 95% yield, 94% ee<br/> <b>2nd</b>. 1/1.5 b/l, 5.9/1 dr, 85% yield, 93% ee</p>    | <p><b>L15</b></p> <p>2Et <b>1st</b>. 19.8/1 b/l, 3.0/1 dr, 85% yield, 99% ee<br/> <b>2nd</b>. 22.8/1 b/l, 3.1/1 dr, 73% yield, 99% ee<br/>                 2Pr <b>1st</b>. 38.5/1 b/l, 3.9/1 dr, 87% yield, 99% ee<br/> <b>2nd</b>. 35.2/1 b/l, 4.0/1 dr, 84% yield, 99% ee</p>              |
| <p><b>L4</b></p> <p>2Et <b>1st</b>. 4.8/1 b/l, 6.5/1 dr, 81% yield, 98% ee<br/> <b>2nd</b>. 5.4/1 b/l, 6.8/1 dr, 72% yield, 99% ee<br/>                 2Pr <b>1st</b>. 4.5/1 b/l, 16.7/1 dr, 56% yield, 99% ee<br/> <b>2nd</b>. 5.3/1 b/l, 10.5/1 dr, 84% yield, 99% ee</p>   | <p><b>L10</b></p> <p>2Et <b>1st</b>. 1/1.1 b/l, 3.8/1 dr, 88% yield, 95% ee<br/> <b>2nd</b>. 1/1.1 b/l, 5.2/1 dr, 80% yield, 95% ee<br/>                 2Pr <b>1st</b>. 1/1.2 b/l, 6.7/1 dr, 100% yield, 95% ee<br/> <b>2nd</b>. 1/1.0 b/l, 6.4/1 dr, 86% yield, 95% ee</p>  | <p><b>L16</b></p> <p>2Et <b>1st</b>. &gt;50/1 b/l, 8.2/1 dr, 69% yield, 99% ee<br/> <b>2nd</b>. &gt;50/1 b/l, 8.8/1 dr, 76% yield, 99% ee<br/>                 2Pr <b>1st</b>. &gt;50/1 b/l, 10.9/1 dr, 71% yield, 99% ee<br/> <b>2nd</b>. &gt;50/1 b/l, 11.6/1 dr, 80% yield, 99% ee</p>    |
| <p><b>L5</b></p> <p>2Et <b>1st</b>. 4.0/1 b/l, 11.0/1 dr, 83% yield, 98% ee<br/> <b>2nd</b>. 4.2/1 b/l, 10.8/1 dr, 83% yield, 98% ee<br/>                 2Pr <b>1st</b>. 4.2/1 b/l, 16.7/1 dr, 95% yield, 99% ee<br/> <b>2nd</b>. 4.5/1 b/l, 15.9/1 dr, 85% yield, 97% ee</p> | <p><b>L11</b></p> <p>2Et <b>1st</b>. 1/1.4 b/l, 2.7/1 dr, 86% yield, 93% ee<br/> <b>2nd</b>. 1/1.6 b/l, 4.9/1 dr, 87% yield, 94% ee<br/>                 2Pr <b>1st</b>. 1/1.6 b/l, 5.4/1 dr, 85% yield, 95% ee<br/> <b>2nd</b>. 1/1.5 b/l, 6.2/1 dr, 84% yield, 94% ee</p>   | <p><b>L17</b></p> <p>2Et <b>1st</b>. &gt;50/1 b/l, 1.5/1 dr, 77% yield, 99% ee<br/> <b>2nd</b>. &gt;50/1 b/l, 1.5/1 dr, 85% yield, 99% ee<br/>                 2Pr <b>1st</b>. &gt;50/1 b/l, 1.9/1 dr, 85% yield, 99% ee<br/> <b>2nd</b>. &gt;50/1 b/l, 1.9/1 dr, 98% yield, 99% ee</p>      |
| <p><b>L6</b></p> <p>2Et <b>1st</b>. 3.9/1 b/l, 10.6/1 dr, 100% yield, 98% ee<br/> <b>2nd</b>. 3.4/1 b/l, 9.9/1 dr, 96% yield, 98% ee<br/>                 2Pr <b>1st</b>. 3.8/1 b/l, 16.4/1 dr, 96% yield, 98% ee<br/> <b>2nd</b>. 4.1/1 b/l, 17.7/1 dr, 98% yield, 97% ee</p> | <p><b>L12</b></p> <p>2Et <b>1st</b>. 1/1.1 b/l, 3.8/1 dr, 88% yield, 95% ee<br/> <b>2nd</b>. 1.0/1 b/l, 2.5/1 dr, 100% yield, 94% ee<br/>                 2Pr <b>1st</b>. 1/1.2 b/l, 6.7/1 dr, 100% yield, 95% ee<br/> <b>2nd</b>. 1/1.2 b/l, 9.1/1 dr, 95% yield, 95% ee</p> | <p><b>L18</b></p> <p>2Et <b>1st</b>. &gt;50/1 b/l, 19.8/1 dr, 91% yield, 99% ee<br/> <b>2nd</b>. &gt;50/1 b/l, 23.2/1 dr, 89% yield, 99% ee<br/>                 2Pr <b>1st</b>. &gt;50/1 b/l, 19.9/1 dr, 97% yield, 99% ee<br/> <b>2nd</b>. &gt;50/1 b/l, 23.1/1 dr, 100% yield, 99% ee</p> |

## 11. Details of the Molecular Field Analysis.

Scripts for the MFA are available at <https://github.com/sh-yamaguchi/MFA>. Brief summary about how to run the scripts are shown on page S95. Important structural information with all the 36 Ir- $\pi$ -allyl intermediate structures (xyz files) obtained by running the scripts is found in “output” folder of SI. Under the output folder, three major folders “text”, “test”, “another” can be found. The “text” folder includes xyz files described in the text (Figure 2, figs S4-S6). The “test” folder includes xyz files described in the external validation section (fig S12). The “another” folder includes xyz files described in another design pathway (figs S14-S17). Two types of descriptors were employed for the MFA described in the text (For the details, see: Calculations of the molecular fields section below). Descriptor 1 was used for the MFA in the text and MFA using descriptor 2 and the same training samples with the MFA shown in the text was described in the SI (figs S23-S25). Thus, two folders “descriptor 1” and descriptor 2” can be found under the “text” folder. For example, xyz files generated by the MFA of the 24 constitutional selectivity data in the reaction using the ligand **S** shown in the text are found in output/text/descriptor1/S/24/bl. A few lines from the bottom of the xyz files correspond to the important structural information visualized. N/C atoms are the structural information corresponding to the positive coefficients that overlap(N)/do not overlap(C) with the intermediate structure. O/F atoms are the structural information corresponding to the negative coefficients that overlap(O)/do not overlap(F) with the intermediate structure.

**DFT Calculations.** All calculations were performed using Gaussian 16, Revision C.01<sup>8</sup>. We performed optimization of ground state geometries using the B3LYP<sup>9-13</sup> functional and the LANL2DZ<sup>14</sup> effective core potential for Ir, and 6-31G(d) for all other atoms. The MFA using the intermediate structures optimized using the B3LYP<sup>9-13</sup> functional augmented with Grimme’s D3 empirical dispersion term<sup>15</sup> could not lead to design of the ligands **L14**, **L16** (fig. S40) and **L18** (fig. S42). One of the possible explanations is that some of weak non-covalent interactions in the Ir- $\pi$ -allyl complexes do not exist in the corresponding transition state structures consisting of the Ir- $\pi$ -allyl complexes and the boron enolate species or overestimation of the dispersion effects. Frequency calculations were performed to characterize the structures as minima (no imaginary frequency) on the potential surface, and to obtain thermal corrections to the Gibbs free energies. We employed the most stable conformers for the MFA unless otherwise noted (discussion about conformers, see fig. S13). To find the most stable conformers, conformational analysis was performed with the Merck molecular force field implemented in Spartan’18. Conformers within 4 kcal/mol were considered for further computations.

**Calculations of the molecular fields.** In the typical MFA, probe atoms are employed to calculate molecular (interaction) fields<sup>16</sup>. In this study, however, indicator fields were employed, which are one of the molecular fields for MFA<sup>17</sup> and often used for the MFA in asymmetric catalysis<sup>18-21</sup>. (Further discussion for the reason that we employed the indicator fields, see the text.) The protocol for calculations of indicator fields is as follows (fig. S1a). (I) A set of the Ir- $\pi$ -allyl intermediates was optimized using the DFT method at the B3LYP/LANL2DZ (Ir) and 6-31G(d) level. As a reference structure, we used an X-ray crystal structure of well-established intermediates in the related allylic substitution reactions<sup>22,23</sup>. Superimposed structures of the reference X-ray structure and **L1/1Et** aligned based on the allyl group are shown in fig. S1b. (II) The coordinates of the set of the molecules obtained in step I were aligned. For alignment, first, we defined an xy plane based on the mean plane of the allyl group of **L1/1Et** as shown in fig. S1c. The central carbon atom of the allyl group was set as the origin. Then, alignment was performed through the least squares method by minimizing the distances between the allyl groups (the 7 atoms highlighted by red shown in fig. S1b) of **1L/1Et** and other intermediates. (III) The structures were placed in a grid space. The unit cell size is 1 Å per side. We used the molecular structures around the reaction center for calculations of the molecular fields instead of the use of the whole molecular structures to reduce dimensions of descriptors and avoid overfitting. The size of the grid space, which is centered at the origin, is 10 × 12 × 6 Å<sup>3</sup>. Each unit cell is regarded as an element of the descriptor vectors. The unit cells that included Bondi van der Waals radii of C (1.70 Å), H (1.20 Å), O (1.52 Å) atoms were counted as 1, or were otherwise counted as 0. Columns of all 0 and all 1 were removed to give the descriptor matrix (**descriptor 1**). We also employed the descriptor obtained by removal of the columns showing  $|r| \leq 0.3$

(**descriptor 2:**  $|r|$  is an absolute value of a correlation coefficient with the target variables.). In the text, we show the results obtained by using descriptor 1. For the MFA using descriptor 2, the important structural information used for the design was also observed (figs S23-S25). In the models built by using descriptor 1, some regression coefficients for the descriptors showing  $|r| \leq 0.3$  took non-zero values. In some cases, however, the important structural information with  $|r| \leq 0.3$  was useful for the molecular design. For example, the important structural information visualized by the MFA from 20 b/l ratio and dr values in the reactions using ligand **R** (figs S14D and E) showed  $r = 0.29$  for b/l ratios and  $r = 0.23$  for dr. Thus, we recommend to perform MFA using both the descriptors and to compare both the results. All the regression coefficient values including standardized regression coefficients in the regression models used for the molecular design along with correlation coefficient  $r$  and coordinates of unit cell centers are summarized in parameters folder. In the folder, two excel files, text\_test.xlsx and another.xlsx can be found. In the “text\_test” folder, parameters such as regression coefficients of the MFA using descriptor1, descriptor2, and test samples for the molecular design are summarized. In the “another” folder, parameters such as regression coefficients of the MFA described in another design pathway (figs S14-S17) are summarized. Correlation coefficients between the descriptors are also summarized in the excel files.

**LASSO and Elastic Net regression.** Logarithms of constitutional selectivity (b/l) and diastereoselectivity (dr) were employed as target variables (Tables S3 and S4), which correspond to energy differences between the transition states that lead to each isomer ( $\Delta\Delta G^\ddagger = -RT\log(\text{b/l or dr})$ ).  $R$  is the gas constant and  $T$  is the temperature of the reactions, 323.15 K. The indicator fields and  $\Delta\Delta G^\ddagger$  values (kcal/mol) were correlated using LASSO (Least Absolute Shrinkage and Selection Operator)<sup>24</sup> or Elastic Net<sup>25</sup> to generate the regression models. The LASSO and Elastic Net regressions were performed according to the reported procedure<sup>19</sup> using the R package, glmnet<sup>24</sup>. By minimizing the

$$E(\beta) = \sum_{i=1}^n (y_i - \mathbf{x}_i^T \beta)^2 + \lambda \sum_{j=1}^p \{ (1 - \alpha) \beta_j^2 + \alpha |\beta_j| \}$$

above loss function, we can estimate coefficients  $\beta = (\beta_1, \beta_2, \dots, \beta_j, \dots, \beta_p)^T$  while simultaneously assigning unimportant coefficients for reaction outcomes to be 0 (In this study,  $y_i$  is  $\Delta\Delta G^\ddagger$ .  $\mathbf{x}_i = (x_{i1}, x_{i2}, \dots, x_{ij}, \dots, x_{ip})^T$  is the indicator field.  $n$  and  $p$  denote the number of samples and descriptors, respectively.). If  $\alpha$  is 1, this method corresponds to LASSO regression<sup>24</sup>. If  $\alpha$  is  $0 < \alpha < 1$ , this method corresponds to Elastic Net regression<sup>25</sup>. In all cases in this study, we selected values of the hyper parameter  $\lambda$  that minimized the mean squared error calculated from predicted values obtained from leave-one-out cross-validation by using glmnet<sup>19,26</sup>. Among descriptors that are correlated, LASSO will select one. In contrast, Elastic Net can extract multiple correlated descriptors<sup>25</sup>. We performed Elastic Net regression if structural information that led to molecular design could not be found through LASSO regression. For Elastic Net, we varied the parameter  $\alpha$  from 0.1 to 0.9 in steps of 0.1, and for each choice of  $\alpha$  we selected the parameter  $\lambda$  according to the procedure described above using glmnet. Among the models in which the important structural information that led to molecular design was included, we employed the model showing the highest  $q^2$  (coefficient of determination calculated from predicted values of leave-one-out cross-validation [LOOCV]). Coefficients of determination calculated from the resulting regression models ( $R^2$ ) and  $q^2$  are shown in fig. S2 (24 reactions) and fig. S3 (32 reactions) along with plots of the measured and predicted values. The numbers of all descriptors and extracted descriptors are also shown in figs S2 and S3. The measured and predicted values are summarized in Table S3 and S4. We also performed 4-fold CV and y-randomization. The analysis was repeated 100 times for 4-fold CV and 50 times for y-randomization. The average values of the coefficients of determination are shown in fig. S2 and S3 ( $Q^2$  for 4-fold CV and  $R^2_{\text{yrandom}}$  for y-randomization). In all cases,  $Q^2$  showed good values over 0.6, indicating the models are robust. Low values of  $R^2_{\text{yrandom}}$  close to 0 indicate the probability of chance correlation is low.

**Molecular design.** We describe the workflow for the molecular design in this study.

(I) MFA using the sets of selectivity data and the intermediate structures is performed and the quality of the resulting regression models is checked. In this study, we have successfully designed the molecules based on structural information visualized by the MFA. All the regression models showed  $R^2$ ,  $q^2$ ,  $Q^2 > 0.6$  and  $R^2_{y\text{-random}} < 0.2$ . Thus, we tentatively employ these metrics ( $R^2$ ,  $q^2$ ,  $Q^2 > 0.6$  and  $R^2_{y\text{-random}} < 0.2$ ) to determine whether the models are used for the design. (\*In the QSAR [Quantitative Structure-Activity Relationships]/QSPR [Quantitative Structure-Property Relationships] fields, various discussions about metrics to evaluate regression models have been reported<sup>27,28</sup>. However, data-driven design of molecules showing improved selectivity in asymmetric catalysis through the visualized information by MFA is still rare<sup>17</sup>. Thus, further discussion about metrics to evaluate the regression models in this method should be needed after sufficient accumulation of related examples.)

(II) Extracted structural information is visualized on the intermediate structures and all the intermediate structures in the training samples and visualized structural information are thoroughly compared. By considering synthetic accessibility, substituents are introduced to the intermediate structures to overlap light blue points as shown in the text. For the design, we basically employ the structural information that fulfills  $|r| > 0.3$  and shows the same sign with correlation coefficient  $r$  (i.e. the structural information corresponding to positive regression coefficients should show a positive value of correlation coefficient  $r$  with the target variables). If predicted  $\Delta\Delta G^\ddagger$  values of the designed molecules are higher than those of the template molecules, the designed ligands are synthesized and the reactions using the ligands are examined. (III) If the selectivity values are not satisfactory, MFA using all the sets of target variables including those in the reactions with the designed ligands is again performed. This workflow is repeated until designed molecules show high selectivity.

The important structural information with intermediate structures used for the design is shown in Fig. 2, and figs. S4–S6. Structural information from coefficients with absolute values of  $<0.01$  was not visualized (We discuss threshold values in figs. S7, S27c, and S28c.). In figs S4–S6, we also show the origins of the structural information. As shown in fig. S12, we confirmed that the regression model validated by a test set included the structural information corresponding to the information used for the molecular design.

**Interpretation of the important structural information.** We can obtain insights into the diastereoselection mechanisms from the visualized structural information as shown in figs. S19 and S20.

### Python and R scripts for MFA.

Scripts for the molecular field analysis are available at <https://github.com/sh-yamaguchi/MFA>. Here, we describe a brief summary about how to run the scripts. To run the scripts, Mac OS (the environment in which we checked the scripts: Mac OS 10.14), python 3.7, numpy, R, glmnet are required.

#### Calculations of the descriptors

The descriptors (molecular fields) are calculated as follows; Download the folder “data” from SI to a directory. To the same directory, put the lib folder downloaded from the above github site. Then, run the python script shown below.

```
#!/usr/bin/env python
# -*- coding: utf-8 -*-

import numpy as np
import lib.pymfa as pymfa

setting = np.loadtxt("data/setting.txt",str)
mean_plane = int(setting[0,1]); origin = int(setting[1,1]); x_axis = int(setting[2,1]); n = list(setting[3,1]); n = [int(i)
for i in n]
grid_x = int(setting[4,1]); grid_y = int(setting[5,1]); grid_z = int(setting[6,1])
threshold = float(setting[7,1])

ex = pymfa.MolecularFieldAnalysis(mean_plane, origin, x_axis, n, grid_x, grid_y, grid_z, threshold)
mol_name = np.loadtxt("data/mol_name_36.txt",str)

#text/descriptor1
descriptor24 = ex.indicator_field(mol_name[range(24)])
descriptor32 = ex.indicator_field(mol_name[range(32)])
np.savetxt("output/text/descriptor1/descriptor24.txt",descriptor24[1])
np.savetxt("output/text/descriptor1/descriptor32.txt",descriptor32[1])

#text/descriptor2
R36bl = np.loadtxt("data/target_variables/R36bl.txt",usecols = [1,])
R24bl = R36bl[range(24)]
R32bl = R36bl[range(32)]
R36dr = np.loadtxt("data/target_variables/R36dr.txt",usecols = [1,])
R24dr = R36dr[range(24)]
R32dr = R36dr[range(32)]
S36bl = np.loadtxt("data/target_variables/S36bl.txt",usecols = [1,])
S24bl = S36bl[range(24)]
S32bl = S36bl[range(32)]
S36dr = np.loadtxt("data/target_variables/S36dr.txt",usecols = [1,])
S24dr = S36dr[range(24)]
S32dr = S36dr[range(32)]
S36ee = np.loadtxt("data/target_variables/S36ee.txt",usecols = [1,])
S24ee = S36ee[range(24)]
S32ee = S36ee[range(32)]
R36ee = np.loadtxt("data/target_variables/R36ee.txt",usecols = [1,])
```

```

R24ee = R36ee[range(24)]
R32ee = R36ee[range(32)]

descriptorS24bl = ex.indicator_field_corr(mol_name[range(24)],S24bl)
descriptorS32bl = ex.indicator_field_corr(mol_name[range(32)],S32bl)
descriptorS24dr = ex.indicator_field_corr(mol_name[range(24)],S24dr)
descriptorS32dr = ex.indicator_field_corr(mol_name[range(32)],S32dr)
descriptorR24bl = ex.indicator_field_corr(mol_name[range(24)],R24bl)
descriptorR32bl = ex.indicator_field_corr(mol_name[range(32)],R32bl)
descriptorR24dr = ex.indicator_field_corr(mol_name[range(24)],R24dr)
descriptorR32dr = ex.indicator_field_corr(mol_name[range(32)],R32dr)
descriptorR24ee = ex.indicator_field_corr(mol_name[range(24)],R24ee)
descriptorR32ee = ex.indicator_field_corr(mol_name[range(32)],R32ee)
descriptorS24ee = ex.indicator_field_corr(mol_name[range(24)],S24ee)
descriptorS32ee = ex.indicator_field_corr(mol_name[range(32)],S32ee)

np.savetxt("output/text/descriptor2/descriptorS24bl.txt",descriptorS24bl[1])
np.savetxt("output/text/descriptor2/descriptorS32bl.txt",descriptorS32bl[1])
np.savetxt("output/text/descriptor2/descriptorS24dr.txt",descriptorS24dr[1])
np.savetxt("output/text/descriptor2/descriptorS32dr.txt",descriptorS32dr[1])
np.savetxt("output/text/descriptor2/descriptorR24bl.txt",descriptorR24bl[1])
np.savetxt("output/text/descriptor2/descriptorR32bl.txt",descriptorR32bl[1])
np.savetxt("output/text/descriptor2/descriptorR24dr.txt",descriptorR24dr[1])
np.savetxt("output/text/descriptor2/descriptorR32dr.txt",descriptorR32dr[1])
np.savetxt("output/text/descriptor2/descriptorS24ee.txt",descriptorS24ee[1])
np.savetxt("output/text/descriptor2/descriptorS32ee.txt",descriptorS32ee[1])
np.savetxt("output/text/descriptor2/descriptorR24ee.txt",descriptorR24ee[1])
np.savetxt("output/text/descriptor2/descriptorR32ee.txt",descriptorR32ee[1])

#test
mol_name_training24 = np.loadtxt("data/mol_name_24_training.txt",str)
mol_name_training32 = np.loadtxt("data/mol_name_32_training.txt",str)

descriptor_training24 = ex.indicator_field(mol_name_training24)
descriptor_training32 = ex.indicator_field(mol_name_training32)
np.savetxt("output/test/descriptor_training24.txt",descriptor_training24[1])
np.savetxt("output/test/descriptor_training32.txt",descriptor_training32[1])

#another design path
mol_name = np.loadtxt("data/mol_name_28.txt",str)

descriptor20 = ex.indicator_field(mol_name[range(20)])
descriptor22 = ex.indicator_field(mol_name[range(22)])
descriptor26 = ex.indicator_field(mol_name[range(26)])
np.savetxt("output/another/descriptor20.txt",descriptor20[1])
np.savetxt("output/another/descriptor22.txt",descriptor22[1])
np.savetxt("output/another/descriptor26.txt",descriptor26[1])

```

### Regression analysis

The R script for LASSO and Elastic Net regression using the descriptors and the calculated  $\Delta\Delta G^\ddagger$  values is shown below. The text files of the regression coefficients can be obtained by running the R script. All the coefficient values along with 3-dimensional coordinates of unit cell centers etc. are summarized as excel files which can be found in “parameters” folder (SI)

```
#text/descriptor1
S24dr <- read.table("data/target_variables/S36dr.txt",row.names=1,nrows=24)
S24bl <- read.table("data/target_variables/S36bl.txt",row.names=1,nrows=24)
S24ee <- read.table("data/target_variables/S36ee.txt",row.names=1,nrows=24)
R24dr <- read.table("data/target_variables/R36dr.txt",row.names=1,nrows=24)
R24bl <- read.table("data/target_variables/R36bl.txt",row.names=1,nrows=24)
R24ee <- read.table("data/target_variables/R36ee.txt",row.names=1,nrows=24)

S32dr <- read.table("data/target_variables/S36dr.txt",row.names=1,nrows=32)
S32bl <- read.table("data/target_variables/S36bl.txt",row.names=1,nrows=32)
S32ee <- read.table("data/target_variables/S36ee.txt",row.names=1,nrows=32)
R32dr <- read.table("data/target_variables/R36dr.txt",row.names=1,nrows=32)
R32bl <- read.table("data/target_variables/R36bl.txt",row.names=1,nrows=32)
R32ee <- read.table("data/target_variables/R36ee.txt",row.names=1,nrows=32)

S24dr <- as.matrix(S24dr$V2)
S24bl <- as.matrix(S24bl$V2)
S24ee <- as.matrix(S24ee$V2)
R24dr <- as.matrix(R24dr$V2)
R24bl <- as.matrix(R24bl$V2)
R24ee <- as.matrix(R24ee$V2)

S32dr <- as.matrix(S32dr$V2)
S32bl <- as.matrix(S32bl$V2)
S32ee <- as.matrix(S32ee$V2)
R32dr <- as.matrix(R32dr$V2)
R32bl <- as.matrix(R32bl$V2)
R32ee <- as.matrix(R32ee$V2)

descriptor24 <- read.table("output/text/descriptor1/descriptor24.txt", header=TRUE)
descriptor32 <- read.table("output/text/descriptor1/descriptor32.txt", header=TRUE)
library(glmnet)
lasso_S24dr <- cv.glmnet(as.matrix(descriptor24), as.matrix(S24dr), nfold=24, alpha=1.0, grouped=FALSE)
lasso_S24bl <- cv.glmnet(as.matrix(descriptor24), as.matrix(S24bl), nfold=24, alpha=1.0, grouped=FALSE)
lasso_S24ee <- cv.glmnet(as.matrix(descriptor24), as.matrix(S24ee), nfold=24, alpha=1.0, grouped=FALSE)
lasso_R24dr <- cv.glmnet(as.matrix(descriptor24), as.matrix(R24dr), nfold=24, alpha=1.0, grouped=FALSE)
lasso_R24bl <- cv.glmnet(as.matrix(descriptor24), as.matrix(R24bl), nfold=24, alpha=1.0, grouped=FALSE)
lasso_R24ee <- cv.glmnet(as.matrix(descriptor24), as.matrix(R24ee), nfold=24, alpha=1.0, grouped=FALSE)

lasso_S32dr <- cv.glmnet(as.matrix(descriptor32), as.matrix(S32dr), nfold=32, alpha=1.0, grouped=FALSE)
lasso_S32bl <- cv.glmnet(as.matrix(descriptor32), as.matrix(S32bl), nfold=32, alpha=1.0, grouped=FALSE)
lasso_S32ee <- cv.glmnet(as.matrix(descriptor32), as.matrix(S32ee), nfold=32, alpha=1.0, grouped=FALSE)
```

```

lasso_R32dr <- cv.glmnet(as.matrix(descriptor32), as.matrix(R32dr), nfold=32, alpha=1.0, grouped=FALSE)
lasso_R32bl <- cv.glmnet(as.matrix(descriptor32), as.matrix(R32bl), nfold=32, alpha=1.0, grouped=FALSE)
lasso_R32ee <- cv.glmnet(as.matrix(descriptor32), as.matrix(R32ee), nfold=32, alpha=1.0, grouped=FALSE)

s_S24dr = lasso_S24dr$lambda.min
s_S24bl = lasso_S24bl$lambda.min
s_S24ee = lasso_S24ee$lambda.min
s_R24dr = lasso_R24dr$lambda.min
s_R24bl = lasso_R24bl$lambda.min
s_R24ee = lasso_R24ee$lambda.min

s_S32dr = lasso_S32dr$lambda.min
s_S32bl = lasso_S32bl$lambda.min
s_S32ee = lasso_S32ee$lambda.min
s_R32dr = lasso_R32dr$lambda.min
s_R32bl = lasso_R32bl$lambda.min
s_R32ee = lasso_R32ee$lambda.min

coefficient_S24dr = coef(lasso_S24dr, s_S24dr)
coefficient_S24bl = coef(lasso_S24bl, s_S24bl)
coefficient_S24ee = coef(lasso_S24ee, s_S24ee)
coefficient_R24dr = coef(lasso_R24dr, s_R24dr)
coefficient_R24bl = coef(lasso_R24bl, s_R24bl)
coefficient_R24ee = coef(lasso_R24ee, s_R24ee)

coefficient_S32dr = coef(lasso_S32dr, s_S32dr)
coefficient_S32bl = coef(lasso_S32bl, s_S32bl)
coefficient_S32ee = coef(lasso_S32ee, s_S32ee)
coefficient_R32dr = coef(lasso_R32dr, s_R32dr)
coefficient_R32bl = coef(lasso_R32bl, s_R32bl)
coefficient_R32ee = coef(lasso_R32ee, s_R32ee)

write.table(as.matrix(coefficient_S24dr), file="output/text/descriptor1/coefficient_S24dr.txt", col.name=FALSE,
quote=FALSE)
write.table(as.matrix(coefficient_S24bl), file="output/text/descriptor1/coefficient_S24bl.txt", col.name=FALSE,
quote=FALSE)
write.table(as.matrix(coefficient_S24ee), file="output/text/descriptor1/coefficient_S24ee.txt", col.name=FALSE,
quote=FALSE)
write.table(as.matrix(coefficient_R24dr), file="output/text/descriptor1/coefficient_R24dr.txt", col.name=FALSE,
quote=FALSE)
write.table(as.matrix(coefficient_R24bl), file="output/text/descriptor1/coefficient_R24bl.txt", col.name=FALSE,
quote=FALSE)
write.table(as.matrix(coefficient_R24ee), file="output/text/descriptor1/coefficient_R24ee.txt",
col.name=FALSE,quote=FALSE)

write.table(as.matrix(coefficient_S32dr), file="output/text/descriptor1/coefficient_S32dr.txt", col.name=FALSE,
quote=FALSE)
write.table(as.matrix(coefficient_S32bl), file="output/text/descriptor1/coefficient_S32bl.txt", col.name=FALSE,
quote=FALSE)

```



```

write.table(as.matrix(coefficient_S32ee), file="output/text/descriptor1/coefficient_S32ee.txt", col.name=FALSE,
quote=FALSE)
write.table(as.matrix(coefficient_R32dr), file="output/text/descriptor1/coefficient_R32dr.txt", col.name=FALSE,
quote=FALSE)
write.table(as.matrix(coefficient_R32bl), file="output/text/descriptor1/coefficient_R32bl.txt", col.name=FALSE,
quote=FALSE)
write.table(as.matrix(coefficient_R32ee), file="output/text/descriptor1/coefficient_R32ee.txt",
col.name=FALSE,quote=FALSE)

```

```

#text/descriptor2

```

```

descriptorS24bl <- read.table("output/text/descriptor2/descriptorS24bl.txt", header=TRUE)
descriptorS32bl <- read.table("output/text/descriptor2/descriptorS32bl.txt", header=TRUE)
descriptorS24dr <- read.table("output/text/descriptor2/descriptorS24dr.txt", header=TRUE)
descriptorS32dr <- read.table("output/text/descriptor2/descriptorS32dr.txt", header=TRUE)
descriptorR24bl <- read.table("output/text/descriptor2/descriptorR24bl.txt", header=TRUE)
descriptorR32bl <- read.table("output/text/descriptor2/descriptorR32bl.txt", header=TRUE)
descriptorR24dr <- read.table("output/text/descriptor2/descriptorR24dr.txt", header=TRUE)
descriptorR32dr <- read.table("output/text/descriptor2/descriptorR32dr.txt", header=TRUE)
descriptorS24ee <- read.table("output/text/descriptor2/descriptorS24ee.txt", header=TRUE)
descriptorS32ee <- read.table("output/text/descriptor2/descriptorS32ee.txt", header=TRUE)
descriptorR24ee <- read.table("output/text/descriptor2/descriptorR24ee.txt", header=TRUE)
descriptorR32ee <- read.table("output/text/descriptor2/descriptorR32ee.txt", header=TRUE)

```

```

lasso_S24dr <- cv.glmnet(as.matrix(descriptorS24dr), as.matrix(S24dr), nfold=24, alpha=1.0, grouped=FALSE)
lasso_S24bl <- cv.glmnet(as.matrix(descriptorS24bl), as.matrix(S24bl), nfold=24, alpha=0.5, grouped=FALSE)
lasso_S24ee <- cv.glmnet(as.matrix(descriptorS24ee), as.matrix(S24ee), nfold=24, alpha=1.0, grouped=FALSE)
lasso_R24dr <- cv.glmnet(as.matrix(descriptorR24dr), as.matrix(R24dr), nfold=24, alpha=1.0, grouped=FALSE)
lasso_R24bl <- cv.glmnet(as.matrix(descriptorR24bl), as.matrix(R24bl), nfold=24, alpha=1.0, grouped=FALSE)
lasso_R24ee <- cv.glmnet(as.matrix(descriptorR24ee), as.matrix(R24ee), nfold=24, alpha=1.0, grouped=FALSE)

```

```

lasso_S32dr <- cv.glmnet(as.matrix(descriptorS32dr), as.matrix(S32dr), nfold=32, alpha=1.0, grouped=FALSE)
lasso_S32bl <- cv.glmnet(as.matrix(descriptorS32bl), as.matrix(S32bl), nfold=32, alpha=1.0, grouped=FALSE)
lasso_S32ee <- cv.glmnet(as.matrix(descriptorS32ee), as.matrix(S32ee), nfold=32, alpha=1.0, grouped=FALSE)
lasso_R32dr <- cv.glmnet(as.matrix(descriptorR32dr), as.matrix(R32dr), nfold=32, alpha=1.0, grouped=FALSE)
lasso_R32bl <- cv.glmnet(as.matrix(descriptorR32bl), as.matrix(R32bl), nfold=32, alpha=1.0, grouped=FALSE)
lasso_R32ee <- cv.glmnet(as.matrix(descriptorR32ee), as.matrix(R32ee), nfold=32, alpha=1.0, grouped=FALSE)

```

```

s_S24dr = lasso_S24dr$lambda.min
s_S24bl = lasso_S24bl$lambda.min
s_S24ee = lasso_S24ee$lambda.min
s_R24dr = lasso_R24dr$lambda.min
s_R24bl = lasso_R24bl$lambda.min
s_R24ee = lasso_R24ee$lambda.min

```

```

s_S32dr = lasso_S32dr$lambda.min
s_S32bl = lasso_S32bl$lambda.min
s_S32ee = lasso_S32ee$lambda.min
s_R32dr = lasso_R32dr$lambda.min

```

```

s_R32bl = lasso_R32bl$lambda.min
s_R32ee = lasso_R32ee$lambda.min

coefficient_S24dr = coef(lasso_S24dr, s_S24dr)
coefficient_S24bl = coef(lasso_S24bl, s_S24bl)
coefficient_S24ee = coef(lasso_S24ee, s_S24ee)
coefficient_R24dr = coef(lasso_R24dr, s_R24dr)
coefficient_R24bl = coef(lasso_R24bl, s_R24bl)
coefficient_R24ee = coef(lasso_R24ee, s_R24ee)

coefficient_S32dr = coef(lasso_S32dr, s_S32dr)
coefficient_S32bl = coef(lasso_S32bl, s_S32bl)
coefficient_S32ee = coef(lasso_S32ee, s_S32ee)
coefficient_R32dr = coef(lasso_R32dr, s_R32dr)
coefficient_R32bl = coef(lasso_R32bl, s_R32bl)
coefficient_R32ee = coef(lasso_R32ee, s_R32ee)

write.table(as.matrix(coefficient_S24dr), file="output/text/descriptor2/coefficient_S24dr.txt", col.name=FALSE,
quote=FALSE)
write.table(as.matrix(coefficient_S24bl), file="output/text/descriptor2/coefficient_S24bl.txt", col.name=FALSE,
quote=FALSE)
write.table(as.matrix(coefficient_S24ee), file="output/text/descriptor2/coefficient_S24ee.txt", col.name=FALSE,
quote=FALSE)
write.table(as.matrix(coefficient_R24dr), file="output/text/descriptor2/coefficient_R24dr.txt", col.name=FALSE,
quote=FALSE)
write.table(as.matrix(coefficient_R24bl), file="output/text/descriptor2/coefficient_R24bl.txt", col.name=FALSE,
quote=FALSE)
write.table(as.matrix(coefficient_R24ee), file="output/text/descriptor2/coefficient_R24ee.txt", col.name=FALSE,
quote=FALSE)

write.table(as.matrix(coefficient_S32dr), file="output/text/descriptor2/coefficient_S32dr.txt", col.name=FALSE,
quote=FALSE)
write.table(as.matrix(coefficient_S32bl), file="output/text/descriptor2/coefficient_S32bl.txt", col.name=FALSE,
quote=FALSE)
write.table(as.matrix(coefficient_S32ee), file="output/text/descriptor2/coefficient_S32ee.txt", col.name=FALSE,
quote=FALSE)
write.table(as.matrix(coefficient_R32dr), file="output/text/descriptor2/coefficient_R32dr.txt", col.name=FALSE,
quote=FALSE)
write.table(as.matrix(coefficient_R32bl), file="output/text/descriptor2/coefficient_R32bl.txt", col.name=FALSE,
quote=FALSE)
write.table(as.matrix(coefficient_R32ee), file="output/text/descriptor2/coefficient_R32ee.txt", col.name=FALSE,
quote=FALSE)

#another design path
R20dr <- read.table("data/target_variables/R28dr.txt",row.names=1,nrows=20)
R20bl <- read.table("data/target_variables/R28bl.txt",row.names=1,nrows=20)

S22bl <- read.table("data/target_variables/S28bl.txt",row.names=1,nrows=22)

```

```

S26dr <- read.table("data/target_variables/S28dr.txt",row.names=1,nrows=26)
S26bl <- read.table("data/target_variables/S28bl.txt",row.names=1,nrows=26)

R20dr <- as.matrix(R20dr$V2)
R20bl <- as.matrix(R20bl$V2)
S22bl <- as.matrix(S22bl$V2)
S26dr <- as.matrix(S26dr$V2)
S26bl <- as.matrix(S26bl$V2)

descriptor20 <- read.table("output/another/descriptor20.txt", header=TRUE)
descriptor22 <- read.table("output/another/descriptor22.txt", header=TRUE)
descriptor26 <- read.table("output/another/descriptor26.txt", header=TRUE)

lasso_R20dr <- cv.glmnet(as.matrix(descriptor20), as.matrix(R20dr), nfold=20, alpha=1.0, grouped=FALSE)
lasso_R20bl <- cv.glmnet(as.matrix(descriptor20), as.matrix(R20bl), nfold=20, alpha=1.0, grouped=FALSE)
lasso_S22bl <- cv.glmnet(as.matrix(descriptor22), as.matrix(S22bl), nfold=22, alpha=1.0, grouped=FALSE)
lasso_S26dr <- cv.glmnet(as.matrix(descriptor26), as.matrix(S26dr), nfold=26, alpha=0.4, grouped=FALSE)
lasso_S26bl <- cv.glmnet(as.matrix(descriptor26), as.matrix(S26bl), nfold=26, alpha=1.0, grouped=FALSE)

s_R20dr = lasso_R20dr$lambda.min
s_R20bl = lasso_R20bl$lambda.min
s_S22bl = lasso_S22bl$lambda.min
s_S26dr = lasso_S26dr$lambda.min
s_S26bl = lasso_S26bl$lambda.min

coefficient_R20dr = coef(lasso_R20dr, s_R20dr)
coefficient_R20bl = coef(lasso_R20bl, s_R20bl)
coefficient_S22bl = coef(lasso_S22bl, s_S22bl)
coefficient_S26dr = coef(lasso_S26dr, s_S26dr)
coefficient_S26bl = coef(lasso_S26bl, s_S26bl)

write.table(as.matrix(coefficient_R20dr), file="output/another/coefficient_R20dr.txt", col.name=FALSE,
quote=FALSE)
write.table(as.matrix(coefficient_R20bl), file="output/another/coefficient_R20bl.txt", col.name=FALSE,
quote=FALSE)
write.table(as.matrix(coefficient_S22bl), file="output/another/coefficient_S22bl.txt", col.name=FALSE,
quote=FALSE)
write.table(as.matrix(coefficient_S26dr), file="output/another/coefficient_S26dr.txt", col.name=FALSE,
quote=FALSE)
write.table(as.matrix(coefficient_S26bl), file="output/another/coefficient_S26bl.txt", col.name=FALSE,
quote=FALSE)

#test
S24bl_training <- read.table("data/target_variables/S24bl_training.txt",row.names=1)

S32dr_training <- read.table("data/target_variables/S32dr_training.txt",row.names=1)
S32bl_training <- read.table("data/target_variables/S32bl_training.txt",row.names=1)
R32dr_training <- read.table("data/target_variables/R32dr_training.txt",row.names=1)

```

```

R32bl_training <- read.table("data/target_variables/R32bl_training.txt",row.names=1)

S24bl_training <- as.matrix(S24bl_training$V2)
S32dr_training <- as.matrix(S32dr_training$V2)
S32bl_training <- as.matrix(S32bl_training$V2)
R32dr_training <- as.matrix(R32dr_training$V2)
R32bl_training <- as.matrix(R32bl_training$V2)

descriptor24_training <- read.table("output/test/descriptor_training24.txt", header=TRUE)
descriptor32_training <- read.table("output/test/descriptor_training32.txt", header=TRUE)

lasso_S24bl <- cv.glmnet(as.matrix(descriptor24_training), as.matrix(S24bl_training), nfold=24, alpha=0.5,
grouped=FALSE)
lasso_S32dr <- cv.glmnet(as.matrix(descriptor32_training), as.matrix(S32dr_training), nfold=32, alpha=1.0,
grouped=FALSE)
lasso_S32bl <- cv.glmnet(as.matrix(descriptor32_training), as.matrix(S32bl_training), nfold=32, alpha=1.0,
grouped=FALSE)
lasso_R32dr <- cv.glmnet(as.matrix(descriptor32_training), as.matrix(R32dr_training), nfold=32, alpha=1.0,
grouped=FALSE)
lasso_R32bl <- cv.glmnet(as.matrix(descriptor32_training), as.matrix(R32bl_training), nfold=32, alpha=1.0,
grouped=FALSE)

s_S24bl = lasso_S24bl$lambda.min
s_S32dr = lasso_S32dr$lambda.min
s_S32bl = lasso_S32bl$lambda.min
s_R32dr = lasso_R32dr$lambda.min
s_R32bl = lasso_R32bl$lambda.min

coefficient_S24bl = coef(lasso_S24bl, s_S24bl)
coefficient_S32dr = coef(lasso_S32dr, s_S32dr)
coefficient_S32bl = coef(lasso_S32bl, s_S32bl)
coefficient_R32dr = coef(lasso_R32dr, s_R32dr)
coefficient_R32bl = coef(lasso_R32bl, s_R32bl)

write.table(as.matrix(coefficient_S24bl), file="output/test/coefficient_S24bl.txt", col.name=FALSE, quote=FALSE)
write.table(as.matrix(coefficient_S32dr), file="output/test/coefficient_S32dr.txt", col.name=FALSE, quote=FALSE)
write.table(as.matrix(coefficient_S32bl), file="output/test/coefficient_S32bl.txt", col.name=FALSE, quote=FALSE)
write.table(as.matrix(coefficient_R32dr), file="output/test/coefficient_R32dr.txt", col.name=FALSE,
quote=FALSE)
write.table(as.matrix(coefficient_R32bl), file="output/test/coefficient_R32bl.txt", col.name=FALSE,
quote=FALSE)

```

### Visualization

The python script for visualization of the important structural information is shown below. The xyz files that include the extracted structural information can be obtained by running the script. The resulting xyz files can be found in the “output” folder (SI). A few lines from the bottom of the xyz files correspond to the important structural information visualized. N/C atoms are the structural information corresponding to the positive coefficients that overlap(N)/do not overlap(C) with the intermediate structure. O/F atoms are

the structural information corresponding to the negative coefficients that overlap(O)/do not overlap(F) with the intermediate structure. Before running the script, download the “output” folder from SI to the directory where the “data” folder was downloaded and remove all the xyz files in the “output” folder.

```
#!/usr/bin/env python
# -*- coding: utf-8 -*-

import numpy as np
import lib.pymfa as pymfa

setting = np.loadtxt("data/setting.txt",str)
mean_plane = int(setting[0,1]); origin = int(setting[1,1]); x_axis = int(setting[2,1]); n = list(setting[3,1]); n = [int(i)
for i in n]
grid_x = int(setting[4,1]); grid_y = int(setting[5,1]); grid_z = int(setting[6,1])
threshold = float(setting[7,1])

ex = pymfa.MolecularFieldAnalysis(mean_plane, origin, x_axis, n, grid_x, grid_y, grid_z, threshold)
mol_name = np.loadtxt("data/mol_name_36.txt",str)

#descriptor1
descriptor24 = ex.indicator_field(mol_name[range(24)])
descriptor32 = ex.indicator_field(mol_name[range(32)])

directory24_1 = "output/text/descriptor1/S/24/dr/"; directory24_2 = "output/text/descriptor1/S/24/bl/";
directory24_3 = "output/text/descriptor1/R/24/dr/"; directory24_4 = "output/text/descriptor1/R/24/bl/";directory24_5
= "output/text/descriptor1/S/24/ee/";directory24_6 = "output/text/descriptor1/R/24/ee/"
directory32_1 = "output/text/descriptor1/S/32/dr/"; directory32_2 = "output/text/descriptor1/S/32/bl/";
directory32_3 = "output/text/descriptor1/R/32/dr/"; directory32_4 = "output/text/descriptor1/R/32/bl/";directory32_5
= "output/text/descriptor1/S/32/ee/";directory32_6 = "output/text/descriptor1/R/32/ee/"

for i in range(len(mol_name)):
    ex.xyz_file("data/mol_name_36.txt",i,ex.structure_info("output/text/descriptor1/coefficient_S24dr.txt",mol
_name,i,descriptor24[0]),directory24_1)
    ex.xyz_file("data/mol_name_36.txt",i,ex.structure_info("output/text/descriptor1/coefficient_S24bl.txt",mol
_name,i,descriptor24[0]),directory24_2)
    ex.xyz_file("data/mol_name_36.txt",i,ex.structure_info("output/text/descriptor1/coefficient_R24dr.txt",mol
_name,i,descriptor24[0]),directory24_3)
    ex.xyz_file("data/mol_name_36.txt",i,ex.structure_info("output/text/descriptor1/coefficient_R24bl.txt",mol
_name,i,descriptor24[0]),directory24_4)
    ex.xyz_file("data/mol_name_36.txt",i,ex.structure_info("output/text/descriptor1/coefficient_S24ee.txt",mol
_name,i,descriptor24[0]),directory24_5)
    ex.xyz_file("data/mol_name_36.txt",i,ex.structure_info("output/text/descriptor1/coefficient_R24ee.txt",mol
_name,i,descriptor24[0]),directory24_6)

    ex.xyz_file("data/mol_name_36.txt",i,ex.structure_info("output/text/descriptor1/coefficient_S32dr.txt",mol
_name,i,descriptor32[0]),directory32_1)
    ex.xyz_file("data/mol_name_36.txt",i,ex.structure_info("output/text/descriptor1/coefficient_S32bl.txt",mol
_name,i,descriptor32[0]),directory32_2)
```

```

        ex.xyz_file("data/mol_name_36.txt",i,ex.structure_info("output/text/descriptor1/coefficient_R32dr.txt",mol
_name,i,descriptor32[0]),directory32_3)
        ex.xyz_file("data/mol_name_36.txt",i,ex.structure_info("output/text/descriptor1/coefficient_R32bl.txt",mol
_name,i,descriptor32[0]),directory32_4)
        ex.xyz_file("data/mol_name_36.txt",i,ex.structure_info("output/text/descriptor1/coefficient_S32ee.txt",mol
_name,i,descriptor32[0]),directory32_5)
        ex.xyz_file("data/mol_name_36.txt",i,ex.structure_info("output/text/descriptor1/coefficient_R32ee.txt",mol
_name,i,descriptor32[0]),directory32_6)

#descriptor2

R36bl = np.loadtxt("data/target_variables/R36bl.txt",usecols = [1,])
R24bl = R36bl[range(24)]
R32bl = R36bl[range(32)]
R36dr = np.loadtxt("data/target_variables/R36dr.txt",usecols = [1,])
R24dr = R36dr[range(24)]
R32dr = R36dr[range(32)]
S36bl = np.loadtxt("data/target_variables/S36bl.txt",usecols = [1,])
S24bl = S36bl[range(24)]
S32bl = S36bl[range(32)]
S36dr = np.loadtxt("data/target_variables/S36dr.txt",usecols = [1,])
S24dr = S36dr[range(24)]
S32dr = S36dr[range(32)]
S36ee = np.loadtxt("data/target_variables/S36ee.txt",usecols = [1,])
S24ee = S36ee[range(24)]
S32ee = S36ee[range(32)]
R36ee = np.loadtxt("data/target_variables/R36ee.txt",usecols = [1,])
R24ee = R36ee[range(24)]
R32ee = R36ee[range(32)]

directory24_1 = "output/text/descriptor2/S/24/dr/"; directory24_2 = "output/text/descriptor2/S/24/bl/";
directory24_3 = "output/text/descriptor2/R/24/dr/"; directory24_4 = "output/text/descriptor2/R/24/bl/";directory24_5
= "output/text/descriptor2/S/24/ee/";directory24_6 = "output/text/descriptor2/R/24/ee/"
directory32_1 = "output/text/descriptor2/S/32/dr/"; directory32_2 = "output/text/descriptor2/S/32/bl/";
directory32_3 = "output/text/descriptor2/R/32/dr/"; directory32_4 = "output/text/descriptor2/R/32/bl/";directory32_5
= "output/text/descriptor2/S/32/ee/";directory32_6 = "output/text/descriptor2/R/32/ee/"

for i in range(len(mol_name)):
    ex.xyz_file("data/mol_name_36.txt",i,ex.structure_info_corr("output/text/descriptor2/coefficient_S24dr.txt
",mol_name,i,descriptor24[0],S24dr),directory24_1)
    ex.xyz_file("data/mol_name_36.txt",i,ex.structure_info_corr("output/text/descriptor2/coefficient_S24bl.txt
",mol_name,i,descriptor24[0],S24bl),directory24_2)
    ex.xyz_file("data/mol_name_36.txt",i,ex.structure_info_corr("output/text/descriptor2/coefficient_R24dr.txt
",mol_name,i,descriptor24[0],R24dr),directory24_3)
    ex.xyz_file("data/mol_name_36.txt",i,ex.structure_info_corr("output/text/descriptor2/coefficient_R24bl.txt
",mol_name,i,descriptor24[0],R24bl),directory24_4)
    ex.xyz_file("data/mol_name_36.txt",i,ex.structure_info_corr("output/text/descriptor2/coefficient_S24ee.txt
",mol_name,i,descriptor24[0],S24ee),directory24_5)

```

```

        ex.xyz_file("data/mol_name_36.txt",i,ex.structure_info_corr("output/text/descriptor2/coefficient_R24ee.txt",mol_name,i,descriptor24[0],R24ee),directory24_6)

        ex.xyz_file("data/mol_name_36.txt",i,ex.structure_info_corr("output/text/descriptor2/coefficient_S32dr.txt",mol_name,i,descriptor32[0],S32dr),directory32_1)
        ex.xyz_file("data/mol_name_36.txt",i,ex.structure_info_corr("output/text/descriptor2/coefficient_S32bl.txt",mol_name,i,descriptor32[0],S32bl),directory32_2)
        ex.xyz_file("data/mol_name_36.txt",i,ex.structure_info_corr("output/text/descriptor2/coefficient_R32dr.txt",mol_name,i,descriptor32[0],R32dr),directory32_3)
        ex.xyz_file("data/mol_name_36.txt",i,ex.structure_info_corr("output/text/descriptor2/coefficient_R32bl.txt",mol_name,i,descriptor32[0],R32bl),directory32_4)
        ex.xyz_file("data/mol_name_36.txt",i,ex.structure_info_corr("output/text/descriptor2/coefficient_S32ee.txt",mol_name,i,descriptor32[0],S32ee),directory32_5)
        ex.xyz_file("data/mol_name_36.txt",i,ex.structure_info_corr("output/text/descriptor2/coefficient_R32ee.txt",mol_name,i,descriptor32[0],R32ee),directory32_6)

#another
mol_name = np.loadtxt("data/mol_name_28.txt",str)

descriptor20 = ex.indicator_field(mol_name[range(20)])
descriptor22 = ex.indicator_field(mol_name[range(22)])
descriptor26 = ex.indicator_field(mol_name[range(26)])

directory26_1 = "output/another/S/26/dr/"; directory26_2 = "output/another/S/26/bl/"; directory22_1 =
"output/another/S/22/bl/"; directory20_1 = "output/another/R/20/dr/"; directory20_2 = "output/another/R/20/bl/"

for i in range(len(mol_name)):
    ex.xyz_file("data/mol_name_28.txt",i,ex.structure_info("output/another/coefficient_S26dr.txt",mol_name,i,descriptor26[0]),directory26_1)
    ex.xyz_file("data/mol_name_28.txt",i,ex.structure_info("output/another/coefficient_S26bl.txt",mol_name,i,descriptor26[0]),directory26_2)
    ex.xyz_file("data/mol_name_28.txt",i,ex.structure_info("output/another/coefficient_S22bl.txt",mol_name,i,descriptor22[0]),directory22_1)
    ex.xyz_file("data/mol_name_28.txt",i,ex.structure_info("output/another/coefficient_R20dr.txt",mol_name,i,descriptor20[0]),directory20_1)
    ex.xyz_file("data/mol_name_28.txt",i,ex.structure_info("output/another/coefficient_R20bl.txt",mol_name,i,descriptor20[0]),directory20_2)

#test
mol_name = np.loadtxt("data/mol_name_36.txt",str)
mol_name_training24 = np.loadtxt("data/mol_name_24_training.txt",str)
mol_name_training32 = np.loadtxt("data/mol_name_32_training.txt",str)

descriptor_training24 = ex.indicator_field(mol_name_training24)
descriptor_training32 = ex.indicator_field(mol_name_training32)

directory24_2 = "output/test/S/24/bl/"
directory32_1 = "output/test/S/32/dr/"; directory32_2 = "output/test/S/32/bl/"; directory32_3 =
"output/test/R/32/dr/"; directory32_4 = "output/test/R/32/bl/"

```

```

for i in range(len(mol_name)):
    ex.xyz_file("data/mol_name_36.txt",i,ex.structure_info("output/test/coefficient_S24bl.txt",mol_name,i,des
criptor_training24[0]),directory24_2)

    ex.xyz_file("data/mol_name_36.txt",i,ex.structure_info("output/test/coefficient_S32dr.txt",mol_name,i,des
criptor_training32[0]),directory32_1)
    ex.xyz_file("data/mol_name_36.txt",i,ex.structure_info("output/test/coefficient_S32bl.txt",mol_name,i,des
criptor_training32[0]),directory32_2)
    ex.xyz_file("data/mol_name_36.txt",i,ex.structure_info("output/test/coefficient_R32dr.txt",mol_name,i,des
criptor_training32[0]),directory32_3)
    ex.xyz_file("data/mol_name_36.txt",i,ex.structure_info("output/test/coefficient_R32bl.txt",mol_name,i,des
criptor_training32[0]),directory32_4)

```



### Calculations of the molecular fields.

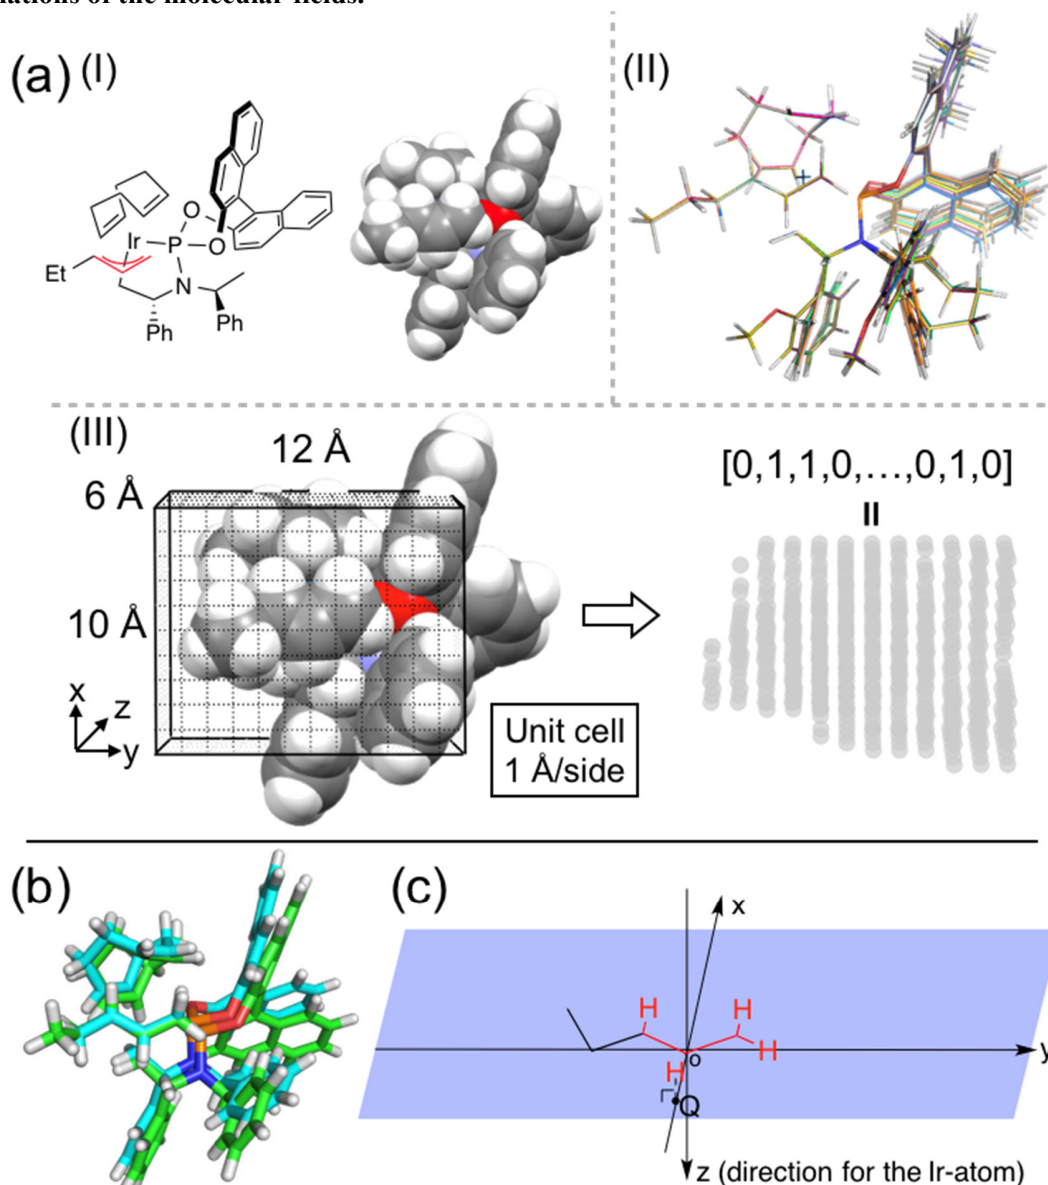

**Fig. S1.** (a) Protocol for molecular field calculations. (I) Optimization of the intermediate structures. (II) Alignment of the intermediate structures (Superposed intermediate structures are shown.). (III) Conversion of 3D-molecular structures to 0,1 vectors. More details are described on page S92 (Calculations of the molecular fields), (b) Superimposed structures of **L1/1Et** (color of carbon atoms: green) and the X-ray crystal structure from Ref 21 (**L1/1Me** : the substituents of allyl group is Me group instead of Et group in **L1/1Et**. color of carbon atoms: light blue). The structures were aligned based on the allyl group highlighted by red in fig. S1a. (c) Definition of the xy plane.

For the alignment of the molecular structures, the xy plane was defined as follows. A mean plane of 7 atoms that compose the  $\pi$ -allyl moiety of **1L/1Et** was defined as the xy plane (fig. S1c). The central  $\pi$ -allyl carbon atom was set as an origin. A hydrogen atom on the central  $\pi$ -allyl carbon atom was used to define an x-axis. A point Q shown in fig. S1b is a foot of a perpendicular drawn from the hydrogen atom to the xy plane. A straight line passing through the origin and point Q was defined as the x axis.

# Plots of the measured vs predicted values

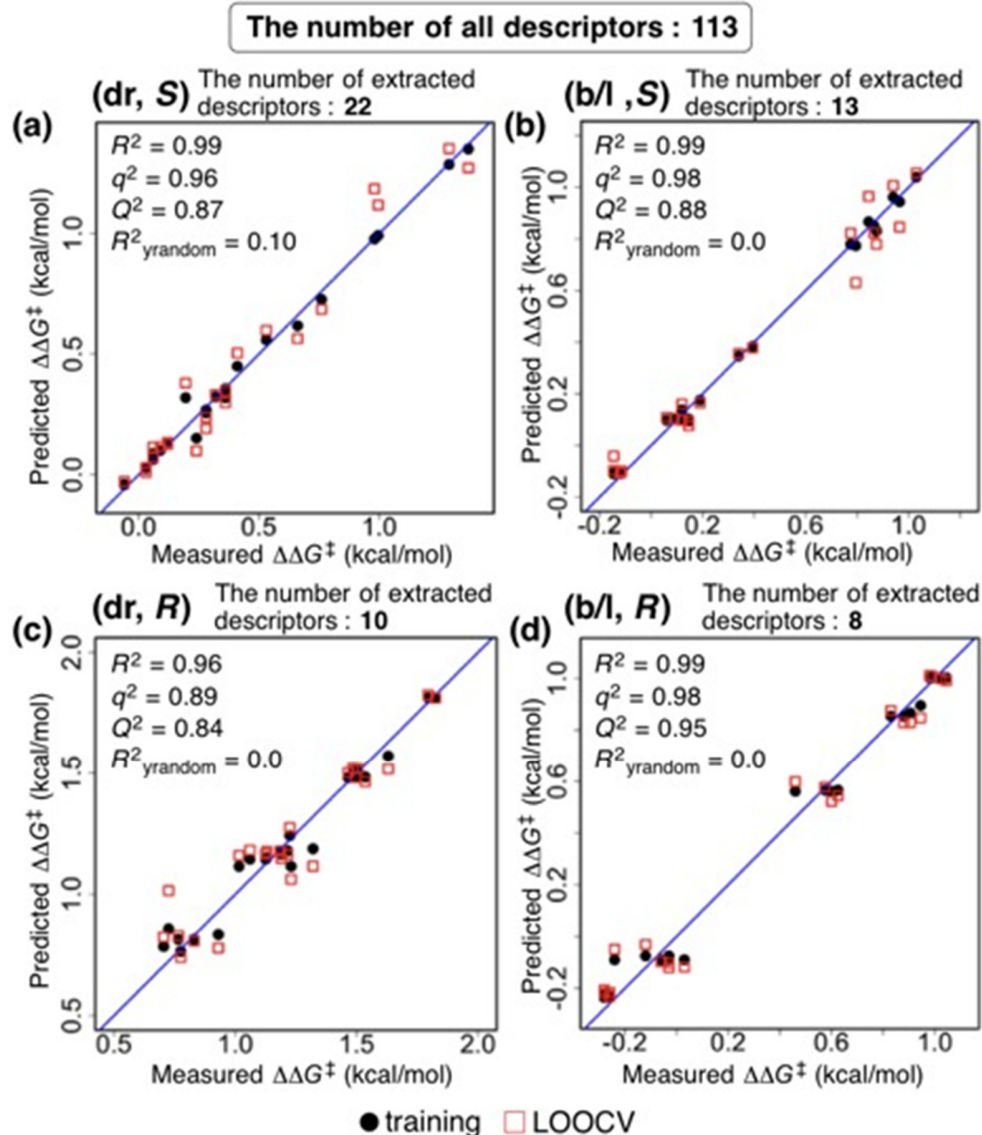

**Fig. S2.** Results of the MFA using 24 training samples. (a)–(d) Plots of the predicted (black dots) and the leave-one-out predicted (red squares) vs. measured  $\Delta\Delta G^\ddagger$  values.  $R^2$  : Coefficient of determination  $q^2$  : Leave-one-out cross-validated coefficient of determination.  $Q^2$  : 4-fold cross-validated coefficient of determination.  $R^2_{\text{yrandom}}$  : Coefficient of determination calculated by y-randomization. The blue line is the  $x=y$  line.

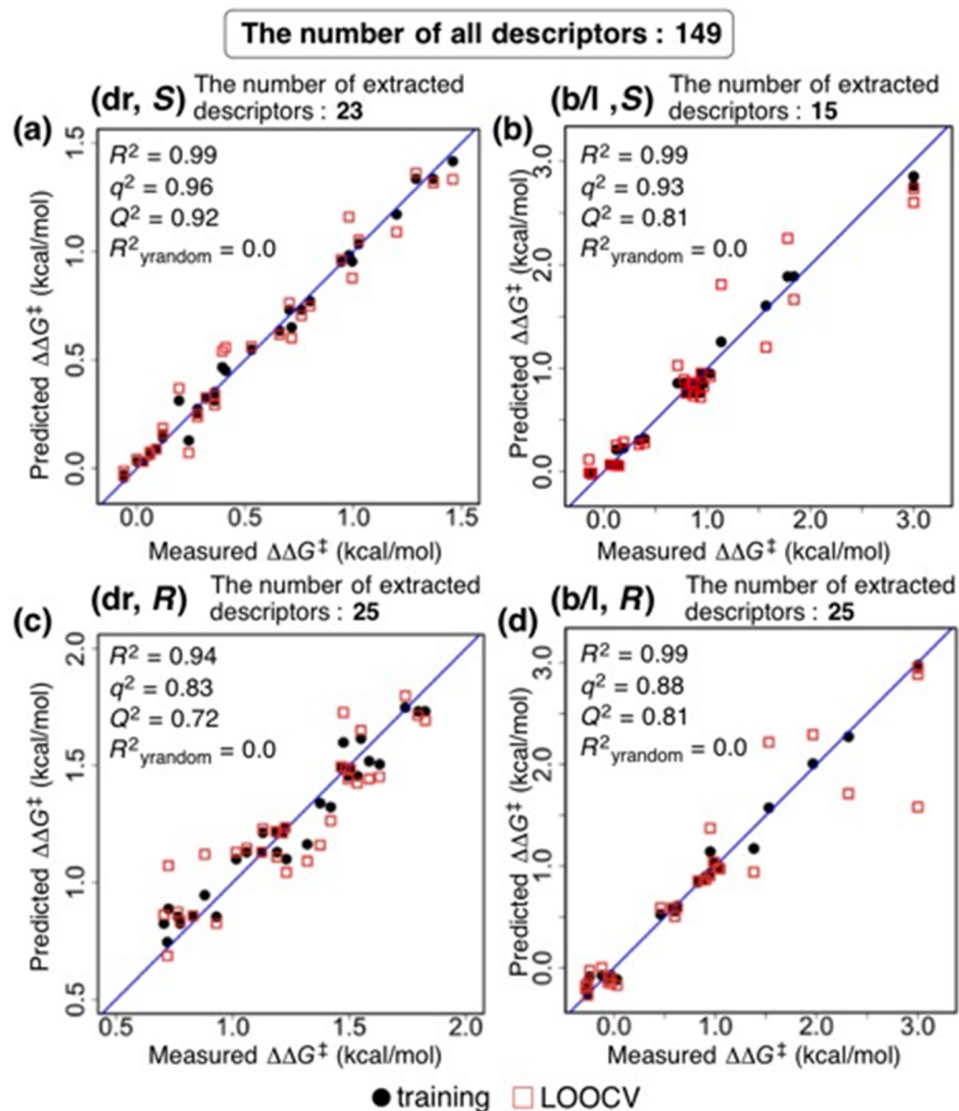

**Fig. S3.** Results of the MFA using 32 training samples. (a)–(d) Plots of the predicted (black dots) and the leave-one-out predicted (red squares) vs. measured  $\Delta\Delta G^\ddagger$  values.  $R^2$ : Coefficient of determination  $q^2$ : Leave-one-out cross-validated coefficient of determination.  $Q^2$ : 4-fold cross-validated coefficient of determination.  $R^2_{\text{yrandom}}$ : Coefficient of determination calculated by y-randomization. The blue line is the  $x=y$  line.

**Table S3. Data of the reactions using valine derived ligand *S* and predicted values.**

Constitutional selectivity (b/l) and diastereoselectivity (dr) of products **2Et** and **2Pr** are shown as  $\Delta\Delta G^\ddagger$  values (kcal/mol), which were used as the target variables for the regression analysis (**Exp.**). Predicted values (**Pred.**) and predicted values from leave-one-out cross-validation [**Pred. (CV)**] are also shown. Ligands for the 1st MFA are highlighted by yellow. Ligands designed at the 1st MFA are highlighted by green. The 2nd MFA was performed including the designed ligands. **L17** is the optimum ligand for the reactions using valine derived ligand *S*. Predicted and measured  $\Delta\Delta G^\ddagger$  values in the reactions using the template and designed molecules are highlighted by red.

|         | 24 reactions (b/l) |        |            | 24 reactions (dr) |        |            | 32 reactions (b/l) |        |            | 32 reactions (dr) |        |            |
|---------|--------------------|--------|------------|-------------------|--------|------------|--------------------|--------|------------|-------------------|--------|------------|
|         | Exp.               | Pred.  | Pred. (CV) | Exp.              | Pred.  | Pred. (CV) | Exp.               | Pred.  | Pred. (CV) | Exp.              | Pred.  | Pred. (CV) |
| L1/1Et  | 0.34               | 0.346  | 0.355      | 0.41              | 0.449  | 0.504      | 0.34               | 0.304  | 0.260      | 0.41              | 0.451  | 0.557      |
| L1/1Pr  | 0.12               | 0.138  | 0.160      | 0.66              | 0.617  | 0.564      | 0.12               | 0.212  | 0.257      | 0.66              | 0.634  | 0.615      |
| L2/1Et  | 0.395              | 0.384  | 0.378      | 0.53              | 0.558  | 0.598      | 0.395              | 0.317  | 0.277      | 0.53              | 0.547  | 0.561      |
| L2/1Pr  | 0.19               | 0.175  | 0.164      | 0.76              | 0.726  | 0.685      | 0.19               | 0.226  | 0.287      | 0.76              | 0.731  | 0.701      |
| L3/1Et  | 1.03               | 1.039  | 1.056      | 0.995             | 0.991  | 1.118      | 1.03               | 0.948  | 0.917      | 0.995             | 0.956  | 0.878      |
| L3/1Pr  | 0.875              | 0.831  | 0.779      | 1.29              | 1.286  | 1.352      | 0.875              | 0.857  | 0.849      | 1.29              | 1.335  | 1.362      |
| L4/1Et  | 0.94               | 0.962  | 1.007      | 0.98              | 0.977  | 1.185      | 0.94               | 0.948  | 0.953      | 0.98              | 0.984  | 1.161      |
| L4/1Pr  | 0.775              | 0.779  | 0.822      | 1.37              | 1.350  | 1.272      | 0.775              | 0.857  | 0.890      | 1.37              | 1.335  | 1.318      |
| L5/1Et  | 0.965              | 0.944  | 0.845      | 0.06              | 0.062  | 0.070      | 0.965              | 0.855  | 0.821      | 0.06              | 0.065  | 0.077      |
| L5/1Pr  | 0.865              | 0.851  | 0.824      | 0.36              | 0.356  | 0.348      | 0.865              | 0.764  | 0.733      | 0.36              | 0.351  | 0.338      |
| L6/1Et  | 0.845              | 0.867  | 0.965      | 0.03              | 0.029  | 0.028      | 0.845              | 0.855  | 0.863      | 0.03              | 0.040  | 0.043      |
| L6/1Pr  | 0.795              | 0.774  | 0.631      | 0.32              | 0.323  | 0.332      | 0.795              | 0.764  | 0.758      | 0.32              | 0.326  | 0.339      |
| L7/1Et  | 0.06               | 0.098  | 0.108      | 0.03              | 0.023  | 0.010      | 0.06               | 0.067  | 0.067      | 0.03              | 0.040  | 0.043      |
| L7/1Pr  | -0.12              | -0.111 | -0.108     | 0.195             | 0.319  | 0.379      | -0.12              | -0.025 | -0.014     | 0.195             | 0.315  | 0.370      |
| L8/1Et  | 0.145              | 0.098  | 0.076      | 0.24              | 0.151  | 0.098      | 0.145              | 0.067  | 0.055      | 0.24              | 0.131  | 0.073      |
| L8/1Pr  | -0.145             | -0.111 | -0.097     | 0.36              | 0.319  | 0.298      | -0.145             | -0.025 | -0.011     | 0.36              | 0.315  | 0.295      |
| L9/1Et  | 0.09               | 0.102  | 0.105      | -0.06             | -0.040 | -0.029     | 0.09               | 0.067  | 0.063      | -0.06             | -0.024 | -0.006     |
| L9/1Pr  | -0.12              | -0.106 | -0.103     | 0.12              | 0.127  | 0.134      | -0.12              | -0.025 | -0.014     | 0.12              | 0.160  | 0.190      |
| L10/1Et | 0.145              | 0.103  | 0.093      | 0.06              | 0.088  | 0.114      | 0.145              | 0.067  | 0.055      | 0.06              | 0.067  | 0.071      |
| L10/1Pr | -0.115             | -0.106 | -0.099     | 0.28              | 0.256  | 0.238      | -0.115             | -0.025 | -0.015     | 0.28              | 0.251  | 0.232      |
| L11/1Et | 0.12               | 0.102  | 0.098      | -0.06             | -0.043 | -0.028     | 0.12               | 0.067  | 0.059      | -0.06             | -0.042 | -0.034     |
| L11/1Pr | -0.12              | -0.106 | -0.103     | 0.12              | 0.125  | 0.126      | -0.12              | -0.025 | -0.014     | 0.12              | 0.142  | 0.156      |
| L12/1Et | 0.12               | 0.102  | 0.098      | 0.09              | 0.100  | 0.115      | 0.12               | 0.067  | 0.059      | 0.09              | 0.091  | 0.092      |
| L12/1Pr | -0.145             | -0.106 | -0.041     | 0.28              | 0.268  | 0.191      | -0.145             | -0.025 | 0.115      | 0.28              | 0.275  | 0.251      |
| L13/1Et | 0.715              | 1.060  |            | 0.395             | 0.277  |            | 0.715              | 0.855  | 1.029      | 0.395             | 0.466  | 0.541      |
| L13/1Pr | 0.935              | 0.851  |            | 0.715             | 0.444  |            | 0.935              | 0.764  | 0.718      | 0.715             | 0.649  | 0.599      |
| L14/1Et | 1.135              | 1.123  |            | 0.705             | 0.818  |            | 1.135              | 1.256  | 1.811      | 0.705             | 0.729  | 0.764      |
| L14/1Pr | 1.57               | 0.914  |            | 1.2               | 1.112  |            | 1.57               | 1.603  | 1.203      | 1.2               | 1.172  | 1.087      |
| L15/1Et | 1.78               | 1.060  |            | 0.8               | 0.320  |            | 1.78               | 1.886  | 2.256      | 0.8               | 0.773  | 0.750      |
| L15/1Pr | 1.84               | 0.851  |            | 0.945             | 0.488  |            | 1.84               | 1.887  | 1.665      | 0.945             | 0.950  | 0.964      |
| L16/1Et | 3                  | 1.123  |            | 1.025             | 0.862  |            | 3                  | 2.854  | 2.734      | 1.025             | 1.037  | 1.054      |
| L16/1Pr | 3                  | 0.914  |            | 1.46              | 1.156  |            | 3                  | 2.763  | 2.603      | 1.46              | 1.416  | 1.338      |
| L17/1Et | 1.82               |        |            | 1.62              |        |            | 1.82               | 2.014  |            | 1.62              | 0.773  |            |
| L17/1Pr | 3                  |        |            | 2.59              |        |            | 3                  | 1.923  |            | 2.59              | 0.957  |            |
| L18/1Et | 3                  |        |            | 0.66              |        |            | 3                  | 1.695  |            | 0.66              | 0.366  |            |
| L18/1Pr | 3                  |        |            | 1.18              |        |            | 3                  | 1.603  |            | 1.18              | 0.549  |            |

**Table S4. Data of the reactions using valine derived ligand *R* and predicted values.**

Constitutional selectivity (b/l) and diastereoselectivity (dr) of products **2Et** and **2Pr** are shown as  $\Delta\Delta G^\ddagger$  values (kcal/mol) used as the target variables for the regression analysis (**Exp.**). Predicted values (**Pred.**) and predicted values from leave-one-out cross-validation [**Pred. (CV)**] are also shown. Ligands for the 1st MFA are highlighted by yellow. Ligands designed at the 1st MFA are highlighted by green. The 2nd MFA was performed including the designed ligands. **L18** is the optimum ligand for the reactions using valine derived ligand *R*. Predicted and measured  $\Delta\Delta G^\ddagger$  values in the reactions using the template and designed molecules are highlighted by red.

|         | 24 reactions (b/l) |        |            | 24 reactions (dr) |       |            | 32 reactions (b/l) |        |            | 32 reactions (dr) |       |            |
|---------|--------------------|--------|------------|-------------------|-------|------------|--------------------|--------|------------|-------------------|-------|------------|
|         | Exp.               | Pred.  | Pred. (CV) | Exp.              | Pred. | Pred. (CV) | Exp.               | Pred.  | Pred. (CV) | Exp.              | Pred. | Pred. (CV) |
| L1/1Et  | 0.46               | 0.561  | 0.599      | 1.13              | 1.151 | 1.176      | 0.46               | 0.526  | 0.589      | 1.13              | 1.213 | 1.230      |
| L1/1Pr  | 0.6                | 0.561  | 0.522      | 1.465             | 1.481 | 1.501      | 0.6                | 0.557  | 0.505      | 1.465             | 1.489 | 1.495      |
| L2/1Et  | 0.575              | 0.566  | 0.577      | 1.225             | 1.242 | 1.275      | 0.575              | 0.576  | 0.587      | 1.225             | 1.229 | 1.236      |
| L2/1Pr  | 0.625              | 0.566  | 0.544      | 1.63              | 1.572 | 1.517      | 0.625              | 0.607  | 0.594      | 1.63              | 1.506 | 1.452      |
| L3/1Et  | 1.025              | 1.003  | 0.999      | 1.185             | 1.179 | 1.177      | 1.025              | 0.993  | 0.981      | 1.185             | 1.213 | 1.218      |
| L3/1Pr  | 0.99               | 1.003  | 1.009      | 1.485             | 1.509 | 1.520      | 0.99               | 1.024  | 1.038      | 1.485             | 1.489 | 1.490      |
| L4/1Et  | 1.045              | 1.003  | 0.992      | 1.215             | 1.179 | 1.164      | 1.045              | 0.993  | 0.973      | 1.215             | 1.213 | 1.212      |
| L4/1Pr  | 0.98               | 1.003  | 1.011      | 1.505             | 1.509 | 1.518      | 0.98               | 1.024  | 1.042      | 1.505             | 1.489 | 1.486      |
| L5/1Et  | 0.905              | 0.867  | 0.830      | 1.535             | 1.484 | 1.465      | 0.905              | 0.895  | 0.866      | 1.535             | 1.456 | 1.425      |
| L5/1Pr  | 0.945              | 0.896  | 0.848      | 1.795             | 1.814 | 1.824      | 0.945              | 0.926  | 0.905      | 1.795             | 1.732 | 1.715      |
| L6/1Et  | 0.83               | 0.855  | 0.877      | 1.495             | 1.484 | 1.482      | 0.83               | 0.842  | 0.854      | 1.495             | 1.456 | 1.442      |
| L6/1Pr  | 0.88               | 0.855  | 0.830      | 1.825             | 1.814 | 1.812      | 0.88               | 0.873  | 0.862      | 1.825             | 1.732 | 1.694      |
| L7/1Et  | -0.28              | -0.226 | -0.207     | 0.775             | 0.765 | 0.741      | -0.28              | -0.223 | -0.178     | 0.775             | 0.825 | 0.838      |
| L7/1Pr  | -0.24              | -0.090 | -0.049     | 1.015             | 1.115 | 1.160      | -0.24              | -0.085 | -0.026     | 1.015             | 1.101 | 1.130      |
| L8/1Et  | 0.03               | -0.090 | -0.118     | 0.705             | 0.785 | 0.824      | 0.03               | -0.116 | -0.170     | 0.705             | 0.825 | 0.862      |
| L8/1Pr  | -0.03              | -0.090 | -0.103     | 1.23              | 1.115 | 1.061      | -0.03              | -0.085 | -0.100     | 1.23              | 1.101 | 1.044      |
| L9/1Et  | -0.28              | -0.226 | -0.207     | 0.765             | 0.814 | 0.829      | -0.28              | -0.223 | -0.195     | 0.765             | 0.854 | 0.874      |
| L9/1Pr  | -0.26              | -0.226 | -0.216     | 1.06              | 1.145 | 1.182      | -0.26              | -0.192 | -0.149     | 1.06              | 1.130 | 1.147      |
| L10/1Et | -0.06              | -0.090 | -0.096     | 0.93              | 0.835 | 0.779      | -0.06              | -0.116 | -0.144     | 0.93              | 0.854 | 0.826      |
| L10/1Pr | -0.06              | -0.090 | -0.096     | 1.19              | 1.165 | 1.148      | -0.06              | -0.085 | -0.092     | 1.19              | 1.130 | 1.109      |
| L11/1Et | -0.26              | -0.236 | -0.232     | 0.83              | 0.814 | 0.808      | -0.26              | -0.255 | -0.270     | 0.83              | 0.854 | 0.858      |
| L11/1Pr | -0.28              | -0.236 | -0.220     | 1.125             | 1.145 | 1.165      | -0.28              | -0.224 | -0.182     | 1.125             | 1.130 | 1.130      |
| L12/1Et | -0.03              | -0.075 | -0.120     | 0.725             | 0.858 | 1.015      | -0.03              | -0.073 | -0.151     | 0.725             | 0.888 | 1.072      |
| L12/1Pr | -0.12              | -0.075 | -0.031     | 1.32              | 1.188 | 1.116      | -0.12              | -0.073 | 0.003      | 1.32              | 1.164 | 1.091      |
| L13/1Et | 0.95               | 0.867  |            | 1.42              | 1.484 |            | 0.95               | 1.142  | 1.372      | 1.42              | 1.323 | 1.264      |
| L13/1Pr | 1.38               | 0.867  |            | 1.475             | 1.814 |            | 1.38               | 1.173  | 0.942      | 1.475             | 1.599 | 1.727      |
| L14/1Et | 1.53               | 0.872  |            | 1.585             | 1.575 |            | 1.53               | 1.574  | 2.216      | 1.585             | 1.519 | 1.443      |
| L14/1Pr | 3                  | 0.872  |            | 1.74              | 1.905 |            | 3                  | 2.957  | 1.581      | 1.74              | 1.748 | 1.798      |
| L15/1Et | 1.965              | 0.867  |            | 0.72              | 1.484 |            | 1.965              | 2.007  | 2.292      | 0.72              | 0.746 | 0.686      |
| L15/1Pr | 2.315              | 0.867  |            | 0.88              | 1.814 |            | 2.315              | 2.273  | 1.711      | 0.88              | 0.946 | 1.121      |
| L16/1Et | 3                  | 0.872  |            | 1.375             | 1.575 |            | 3                  | 2.944  | 2.887      | 1.375             | 1.339 | 1.161      |
| L16/1Pr | 3                  | 0.872  |            | 1.55              | 1.905 |            | 3                  | 2.975  | 2.956      | 1.55              | 1.615 | 1.650      |
| L17/1Et | 3                  |        |            | 0.26              |       |            | 3                  | 2.123  |            | 0.26              | 0.712 |            |
| L17/1Pr | 3                  |        |            | 0.41              |       |            | 3                  | 2.154  |            | 0.41              | 0.988 |            |
| L18/1Et | 3                  |        |            | 1.92              |       |            | 3                  | 2.926  |            | 1.92              | 1.472 |            |
| L18/1Pr | 3                  |        |            | 1.92              |       |            | 3                  | 2.957  |            | 1.92              | 1.748 |            |



## Details of the molecular design

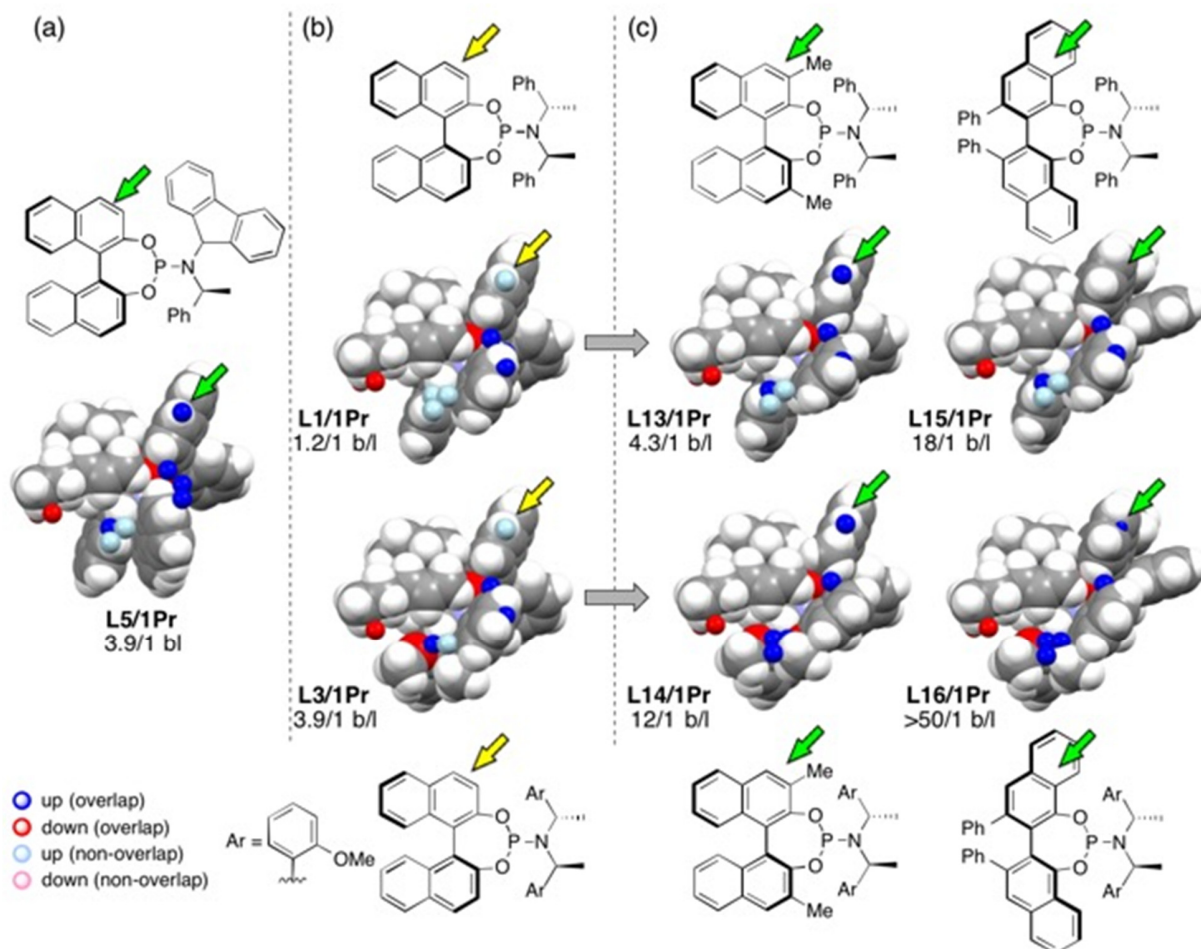

**Fig. S4.** Results of the MFA using b/l data obtained from the 24 reactions with valine ligand **S**. (a) The origin of the blue point used for the molecular design. (b) Design templates. (c) Designed molecules.

The blue point used for the design is derived from, for example, **L5/1Pr**. In comparison to the binaphthyl skeletons of **L1/1Pr** and **L3/1Pr**, that of **L5/1Pr** is closer to the reactive site that affords the linear product, due to the steric repulsion with the fluorene group. On the basis of the light blue point on **L1/1Pr** and **L3/1Pr** indicated by yellow arrow, we designed **L13/1Pr-L16/1Pr** bearing the 3,3'-dimethyl BINOL or VANOL skeleton.

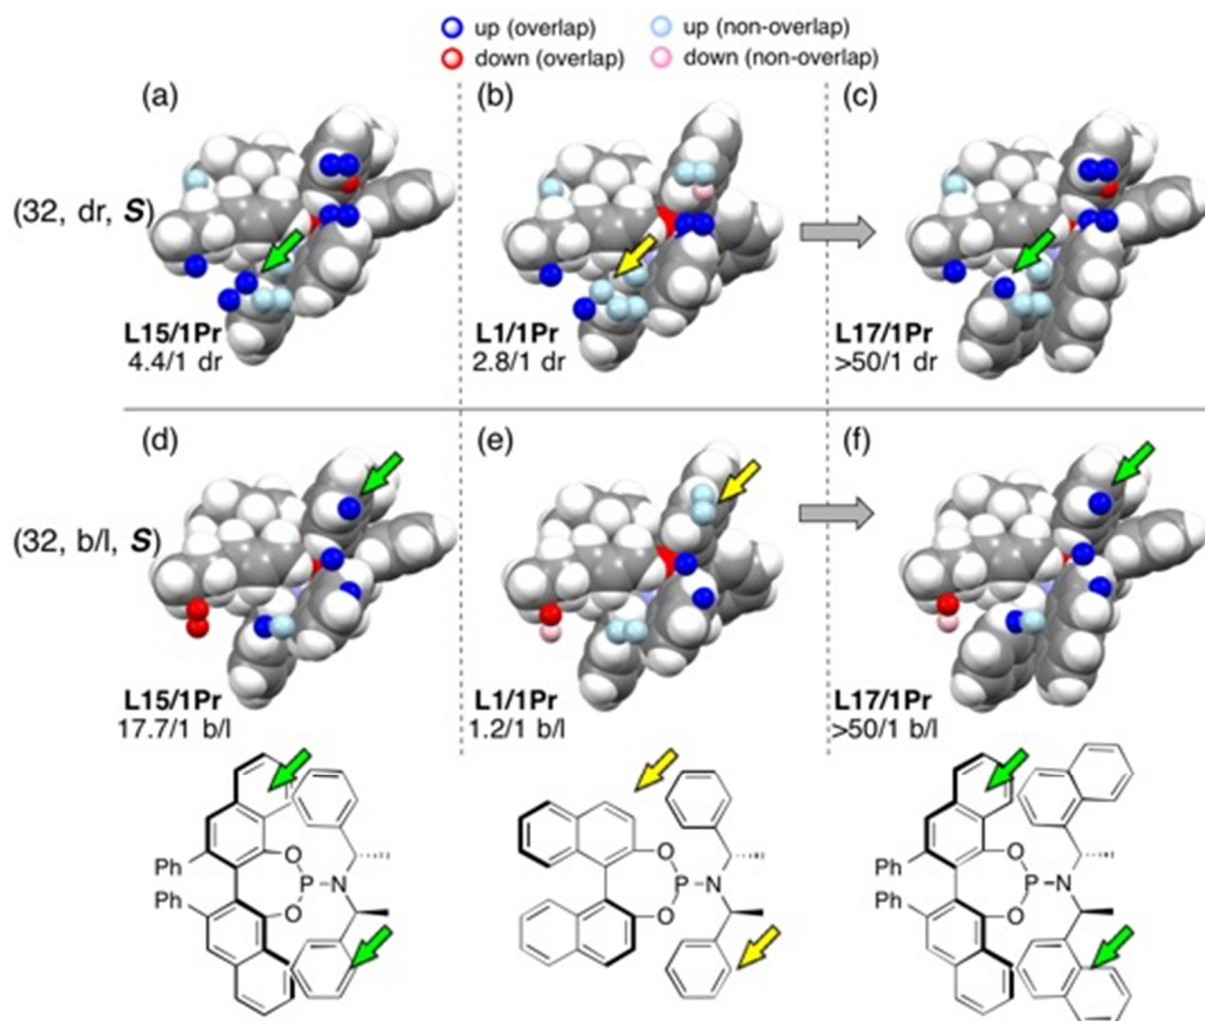

**Fig. S5.** Results of the MFA using b/l and dr data obtained from the 32 reactions with valine ligand **S**. (a), (d) The origin of the blue point used for the molecular design. (b), (e) Design templates. (c), (f) Designed molecules.

As to the structural information for dr, the blue point used for the design is derived from, for example, **L15/1Pr**. The phenyl group of **L15/1Pr** is closer to the allyl group in comparison to that of **L1/1Pr** due to steric repulsion with the VANOL skeleton, indicating increase of the steric demand under the allyl group improves dr. Thus, we designed **L17/1Pr** by introducing the naphthyl group in place of the Ph group of **L1/1Pr** along with employment of the VANOL skeleton.

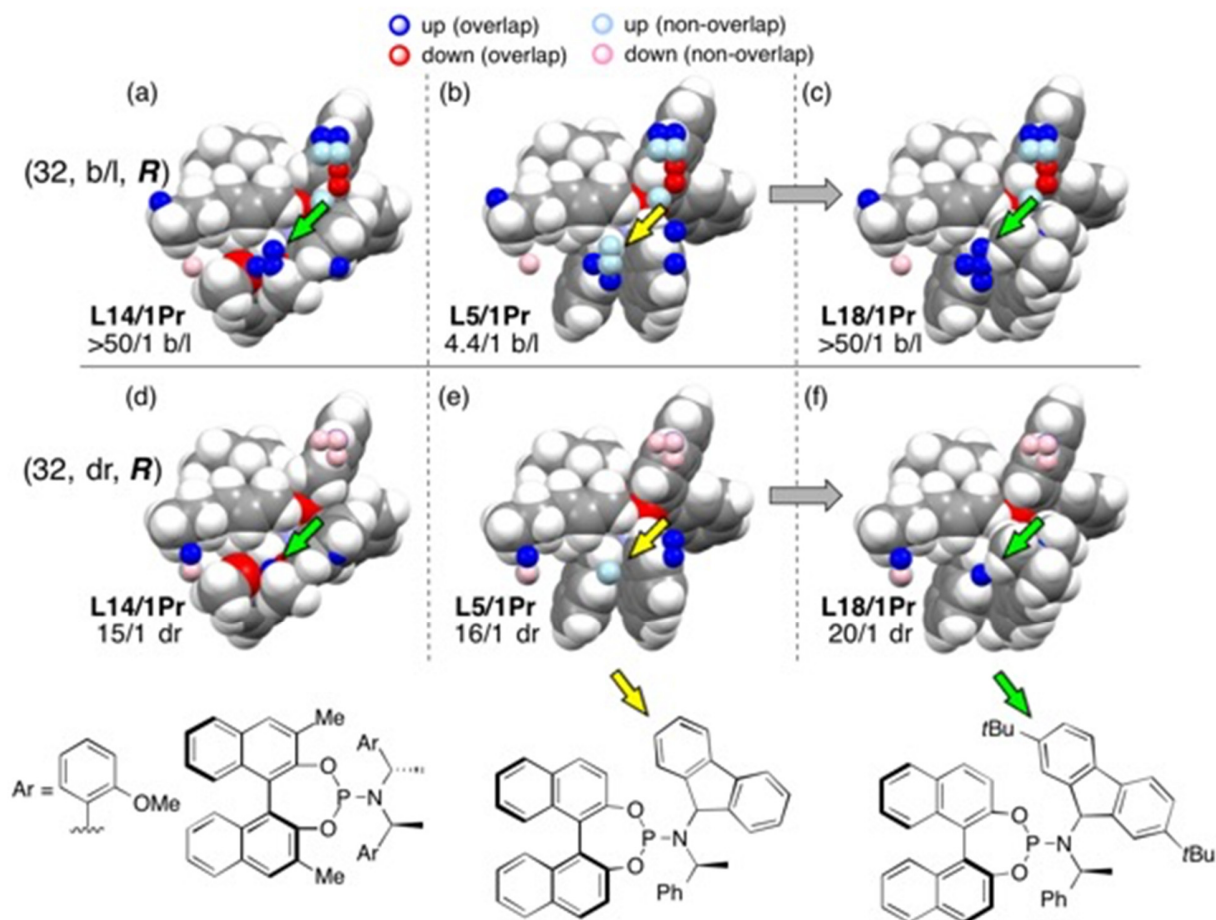

**Fig. S6.** Results of the MFA using b/l and dr data obtained from the 32 reactions with valine ligand *R*. (a), (d) The origin of the blue point used for the molecular design. (b), (e) Design templates. (c), (f) Designed molecules.

The blue points used for the design are derived from, for example, the methoxy group of **L14/1Pr** as shown in figs. **S6a** and **S6d**. On the basis of the light blue point around the 2-position of the fluorene group of **L5/1Pr**, we designed **L18/1Pr** by introducing the *t*Bu group.



### Determination of the threshold value

In the MFA, we did not visualize structural information from coefficients with absolute values of  $<0.01$ . As described in the molecular design section on page S94, we carefully evaluated the regression models and selected the structural information for the molecular design. After the evaluation, practitioners can determine threshold values based on one's intuition to make it easy to obtain insights into reactions (see also figs. S24, S27 and S28). All the results of the MFA used for the design were shown in figs. S8–S11 with threshold values of 0.01 and 0.1. Note that our molecular design is not based on predicted values obtained from the regression models. From the visualized structural information, we obtained the insights into a direction in chemical space where molecules showing improved selectivity would exist, and designed molecules by considering synthetic accessibility. In all cases, however, we confirmed predicted  $\Delta\Delta G^\ddagger$  values of the designed molecules were at least higher than those of the template molecules used for the design (Tables S3, S4 and figs. S7–S11). In medicinal chemistry, it is known that prediction of the activities of molecules that have largely different structures from those included in a training set is difficult by MFA in comparison to conventional QSAR/free energy relationships. MFA is, however, useful to obtain insights into biological activities of molecules from visualized structural information<sup>29</sup>. Although some groups tried to design molecules through visualized structural information by MFA in asymmetric catalysis, enantioselectivity of the designed molecules lay within the range of those in the training samples<sup>19, 30–32</sup>. Most MFA has employed molecular structures without complexation to substrates (e.g. catalyst alone) in calculations of molecular fields. In our study, however, we employed the structures of catalyst-substrate complexes (i.e., Ir- $\pi$ -allyl intermediates) in the selectivity determining step<sup>16</sup>. Formation of the Ir- $\pi$ -allyl intermediates markedly reduced conformational flexibilities and induced structural changes compared to the catalysts alone and substrates alone (as shown in figs S4–S6). These features led to extraction of highly interpretable structural information that resulted in designing the molecules showing improved selectivity.

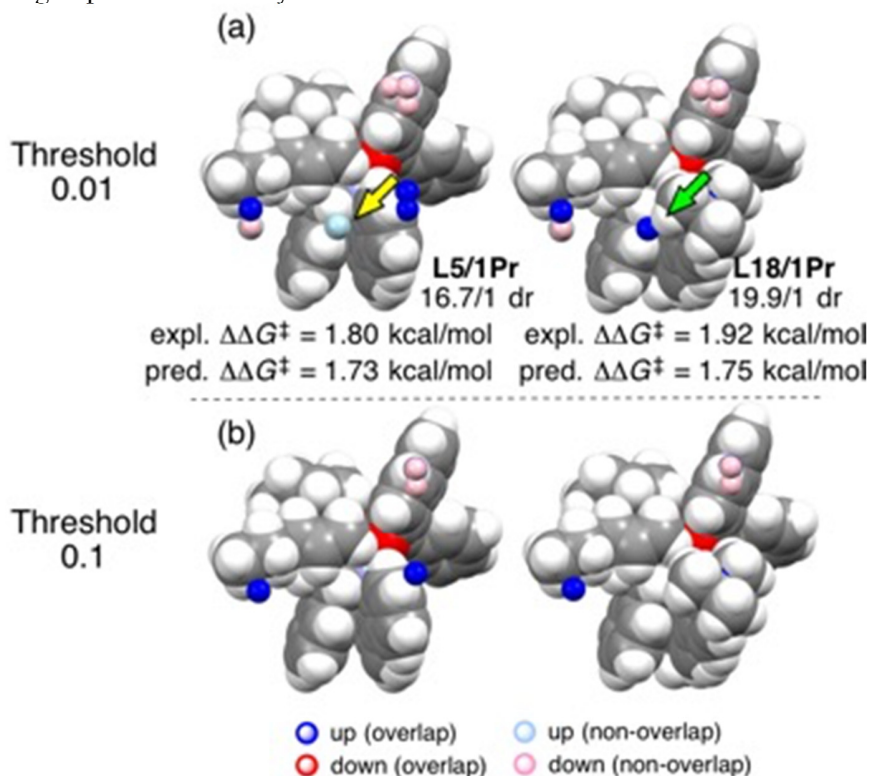

**Fig. S7.** The important structural information visualized from the MFA of dr data in the 32 reactions using ligand **R** with threshold values of (a) 0.01 and (b) 0.1. Template molecules for the molecular design and the designed molecules are shown on the left and right sides, respectively.

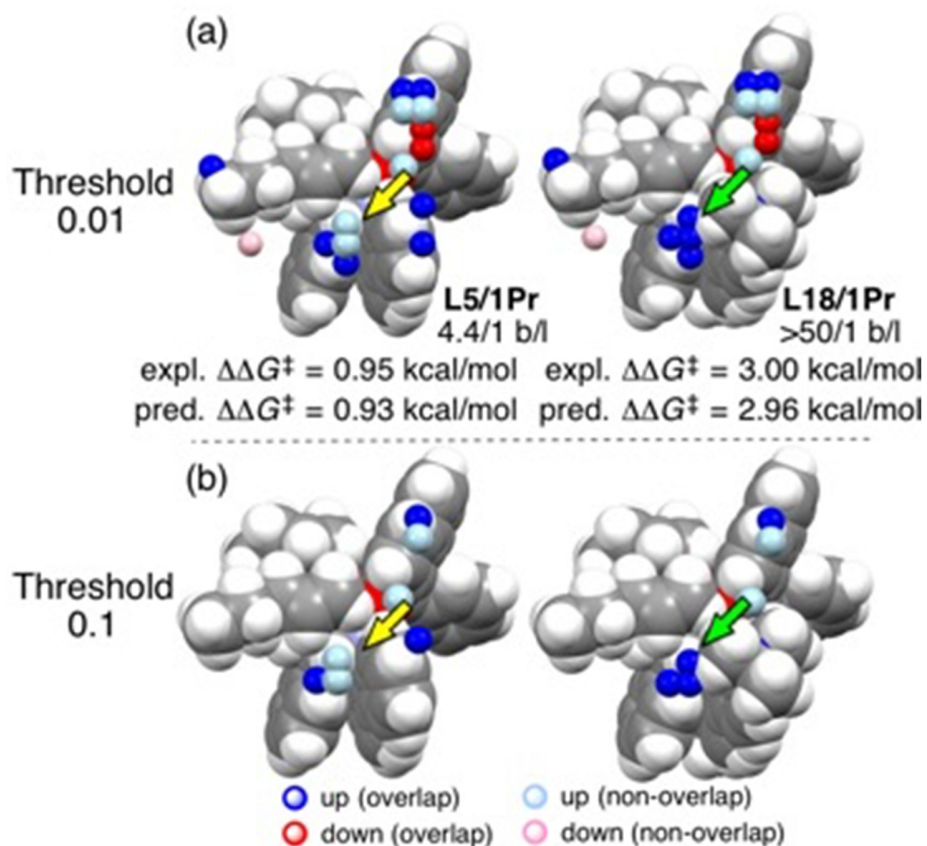

**Fig. S8.** The important structural information visualized from the MFA of b/l data in the 32 reactions using ligand **R** with threshold values of (a) 0.01 and (b) 0.1. Template molecules for the molecular design and the designed molecules are shown on the left and right sides, respectively.

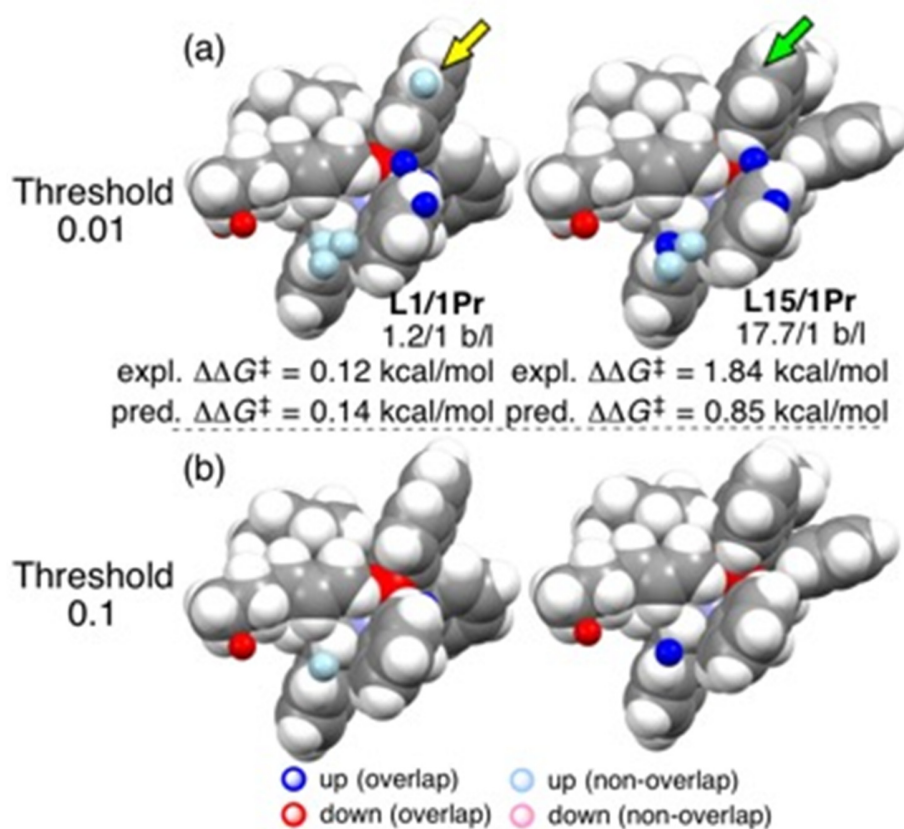

**Fig. S9.** The important structural information visualized from the MFA of b/l data in the 24 reactions using ligand *S* with threshold values of (a) 0.01 and (b) 0.1. Template molecules for the molecular design and the designed molecules are shown on the left and right sides, respectively.

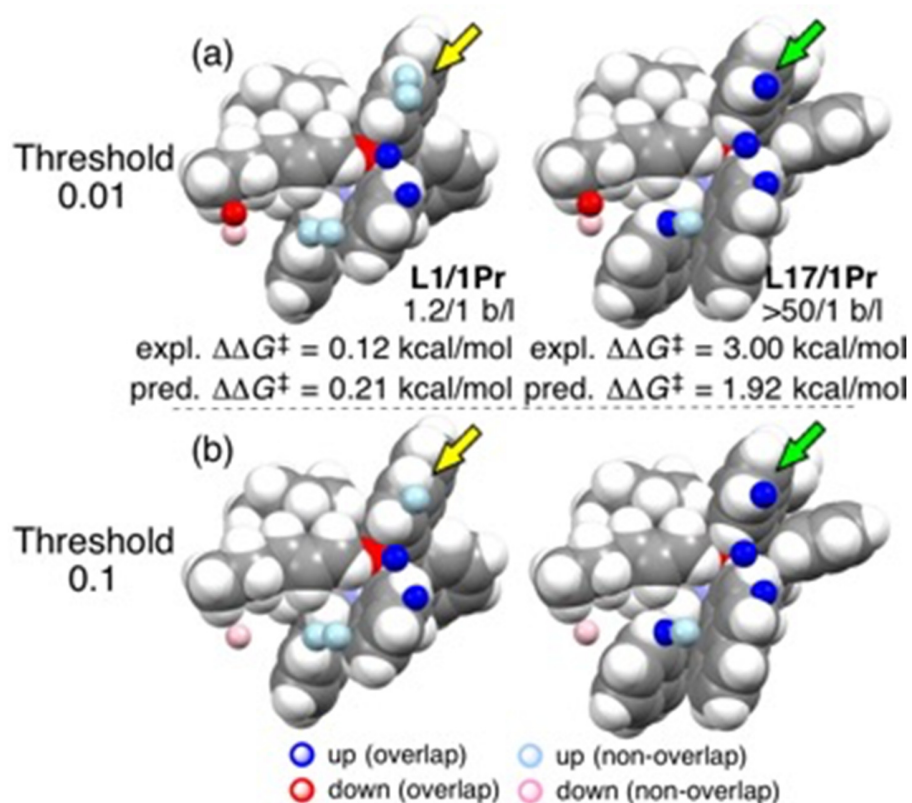

**Fig. S10.** The important structural information visualized from the MFA of b/l data in the 32 reactions using ligand **S** with threshold values of (a) 0.01 and (b) 0.1. Template molecules for the molecular design and the designed molecules are shown on the left and right sides, respectively.

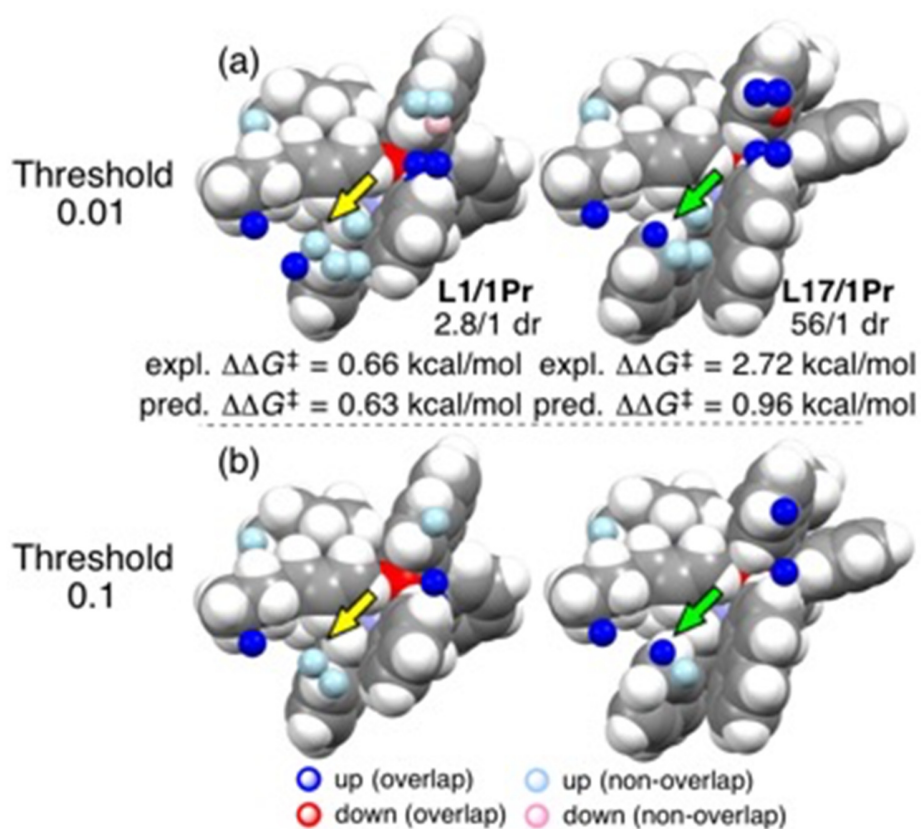

**Fig. S11.** The important structural information visualized from the MFA of dr data in the 32 reactions using ligand **S** with threshold values of (a) 0.01 and (b) 0.1. Template molecules for the molecular design and the designed molecules are shown on the left and right sides, respectively.



### Validation of the regression models using test samples

We evaluate the regression models using leave-one-out cross validation, 4-fold cross-validation and y-randomization (figs S2 and S3). Here, we also evaluate the regression models using test samples. We divided the samples into 19 training and 5 test samples (24 samples), and into 25 training and 7 test samples (32 samples). Test samples were selected to cover the entire region of the sample space visualized on the descriptor space reduced from 113 (24 samples) and 149 (32 samples) to 2 dimensions by PCA (principle component analysis) (fig. S12a and S12b). PCA was performed using scikit-learn<sup>33</sup>. All the 5 regression models used for the molecular design fulfilled the Golbraikh-Trophsa criteria<sup>27</sup> (Table S4) that are frequently used to evaluate QSAR/QSPR models. As shown in figs. S12c–S12g, we can find important structural information corresponding to the information used for the molecular design as indicated by yellow and green arrows.

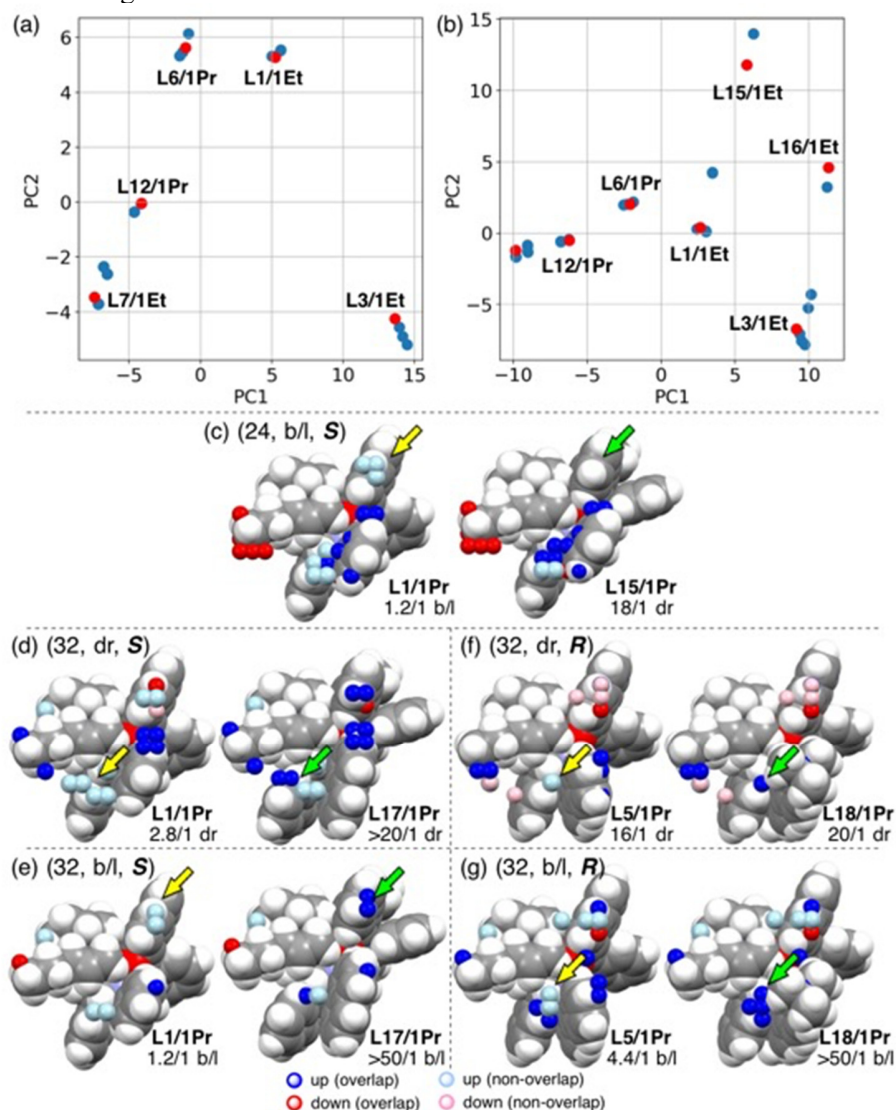

**Fig. S12.** The samples visualized on a descriptor space compressed to 2-dimension by PCA for (a) 24 samples and (b) 32 samples. Blue and red dots indicate training and test samples, respectively. (c)–(g) Visualized important information from the regression models using 19 and 25 training samples. In parenthesis, the numbers of all samples including test samples are shown. The structural information from coefficients with absolute values of  $<0.01$  was not visualized.

**Table S5.** Summary of the MFA using test samples.  $N_{\text{sel}}$  means the number of extracted descriptors.  $\alpha$  is the hyperparameter of Elastic Net shown in LASSO and Elastic Net regression section on page S93. The numbers of all the descriptors are 113 (24 samples) and 149 (36 samples). We evaluated the model based on Golbraikh-Trophsa criteria shown below<sup>27</sup>. Although some regression models show low  $q^2$  values in comparison to  $R^2$  due to the small sample size and the sample selection method, all models fulfil Golbraikh-Trophsa criteria.

1. Coefficient of determination for a test set  $R^2_{\text{pred}} > 0.6$ ;
2. Leave-one-out cross-validated coefficient of determination  $q^2 > 0.5$ ;
3. One of the coefficients of determination for regressions of a test set through the origin (either predicted vs observed values  $R_{\text{o pred}}^2$  or observed vs predicted values  $R_{\text{o pred}}'^2$ ) should have value close to  $R^2_{\text{pred}}$ ;  
 $(R^2_{\text{pred}} - R_{\text{o pred}}^2)/R^2_{\text{pred}}$  or  $(R^2_{\text{pred}} - R_{\text{o pred}}'^2)/R^2_{\text{pred}} < 0.1$  and  $0.85 < k$  or  $k' < 1.15$ , where  $k$  and  $k'$  are slopes of the regression line through the origin.

|                                                                | Valine derived ligand<br><b>S</b> (24 samples) | Valine derived ligand<br><b>S</b> (32 samples) |       | Valine derived ligand<br><b>R</b> (32 samples) |       |
|----------------------------------------------------------------|------------------------------------------------|------------------------------------------------|-------|------------------------------------------------|-------|
|                                                                | b/l                                            | dr                                             | b/l   | dr                                             | b/l   |
| $\alpha$                                                       | 0.5                                            | 1                                              | 1     | 1                                              | 1     |
| $R^2$                                                          | 0.99                                           | 0.99                                           | 0.98  | 0.97                                           | 0.99  |
| $q^2$                                                          | 0.97                                           | 0.93                                           | 0.64  | 0.67                                           | 0.73  |
| $R^2_{\text{pred}}$                                            | 0.96                                           | 0.95                                           | 0.90  | 0.87                                           | 0.96  |
| $N_{\text{sel}}$                                               | 65                                             | 32                                             | 12    | 43                                             | 24    |
| $R_{\text{o pred}}^2$                                          | 0.96                                           | 0.94                                           | 0.90  | 0.87                                           | 0.96  |
| $R_{\text{o pred}}'^2$                                         | 0.96                                           | 0.95                                           | 0.90  | 0.84                                           | 0.96  |
| $k$                                                            | 1.04                                           | 1.06                                           | 1.14  | 1.07                                           | 1.02  |
| $k'$                                                           | 0.94                                           | 0.93                                           | 0.83  | 0.92                                           | 0.96  |
| $(R^2_{\text{pred}} - R_{\text{o pred}}^2)/R^2_{\text{pred}}$  | <0.01                                          | <0.01                                          | <0.01 | <0.01                                          | <0.01 |
| $(R^2_{\text{pred}} - R_{\text{o pred}}'^2)/R^2_{\text{pred}}$ | <0.01                                          | <0.01                                          | <0.01 | 0.03                                           | <0.01 |

**Table S6. Data of the reactions using valine derived ligand *S* and predicted values (external validation).**

Constitutional selectivity (b/l) and diastereoselectivity (dr) of products **2Et** and **2Pr** are shown as  $\Delta\Delta G^\ddagger$  values (kcal/mol), which were used as the target variables for the regression analysis (**Exp.**). Predicted values (**Pred.**) and predicted values from leave-one-out cross-validation [**Pred. (CV)**] are also shown. Training and test samples are highlighted by yellow and purple respectively. Ligands designed are highlighted by green. **L17** is the optimum ligand for the reactions using valine derived ligand *S*. Predicted and measured  $\Delta\Delta G^\ddagger$  values in the reactions using the template and designed molecules are highlighted by red.

|         | 24 reactions (b/l) |        |            |         | 32 reactions (b/l) |       |            |         | 32 reactions (dr) |        |            |
|---------|--------------------|--------|------------|---------|--------------------|-------|------------|---------|-------------------|--------|------------|
|         | Exp.               | Pred.  | Pred. (CV) |         | Exp.               | Pred. | Pred. (CV) |         | Exp.              | Pred.  | Pred. (CV) |
| L1/1Pr  | 0.12               | 0.144  | 0.189      | L1/1Pr  | 0.12               | 0.187 | 0.271      | L1/1Pr  | 0.66              | 0.659  | 0.697      |
| L2/1Et  | 0.395              | 0.403  | 0.417      | L2/1Et  | 0.395              | 0.289 | 0.189      | L2/1Et  | 0.53              | 0.554  | 0.587      |
| L2/1Pr  | 0.19               | 0.176  | 0.159      | L2/1Pr  | 0.19               | 0.237 | 0.327      | L2/1Pr  | 0.76              | 0.733  | 0.697      |
| L3/1Pr  | 0.875              | 0.826  | 0.757      | L3/1Pr  | 0.875              | 0.842 | 0.822      | L3/1Pr  | 1.29              | 1.306  | 1.355      |
| L4/1Et  | 0.94               | 0.937  | 1.002      | L4/1Et  | 0.94               | 0.893 | 0.870      | L4/1Et  | 0.98              | 0.977  | 1.165      |
| L4/1Pr  | 0.775              | 0.801  | 0.858      | L4/1Pr  | 0.775              | 0.842 | 0.878      | L4/1Pr  | 1.37              | 1.337  | 1.278      |
| L5/1Et  | 0.965              | 0.951  | 0.841      | L5/1Et  | 0.965              | 0.844 | 0.815      | L5/1Et  | 0.06              | 0.060  | 0.036      |
| L5/1Pr  | 0.865              | 0.847  | 0.706      | L5/1Pr  | 0.865              | 0.792 | 0.769      | L5/1Pr  | 0.36              | 0.360  | 0.238      |
| L6/1Et  | 0.845              | 0.849  | 0.946      | L6/1Et  | 0.845              | 0.844 | 0.850      | L6/1Et  | 0.03              | 0.037  | 0.059      |
| L7/1Pr  | -0.12              | -0.110 | -0.109     | L7/1Pr  | -0.12              | 0.005 | 0.023      | L7/1Pr  | 0.195             | 0.316  | 0.382      |
| L8/1Et  | 0.145              | 0.117  | 0.094      | L8/1Et  | 0.145              | 0.056 | 0.007      | L8/1Et  | 0.24              | 0.137  | 0.051      |
| L8/1Pr  | -0.145             | -0.110 | -0.103     | L8/1Pr  | -0.145             | 0.005 | 0.027      | L8/1Pr  | 0.36              | 0.316  | 0.292      |
| L9/1Et  | 0.09               | 0.117  | 0.125      | L9/1Et  | 0.09               | 0.056 | 0.049      | L9/1Et  | -0.06             | -0.027 | -0.006     |
| L9/1Pr  | -0.12              | -0.110 | -0.109     | L9/1Pr  | -0.12              | 0.005 | 0.023      | L9/1Pr  | 0.12              | 0.152  | 0.182      |
| L10/1Et | 0.145              | 0.117  | 0.107      | L10/1Et | 0.145              | 0.056 | 0.037      | L10/1Et | 0.06              | 0.073  | 0.084      |
| L10/1Pr | -0.115             | -0.110 | -0.110     | L10/1Pr | -0.115             | 0.005 | 0.022      | L10/1Pr | 0.28              | 0.252  | 0.228      |
| L11/1Et | 0.12               | 0.117  | 0.117      | L11/1Et | 0.12               | 0.056 | 0.043      | L11/1Et | -0.06             | -0.041 | -0.029     |
| L11/1Pr | -0.12              | -0.110 | -0.103     | L11/1Pr | -0.12              | 0.005 | 0.103      | L11/1Pr | 0.12              | 0.138  | 0.150      |
| L12/1Et | 0.12               | 0.119  | 0.104      | L12/1Et | 0.12               | 0.126 | 0.056      | L12/1Et | 0.09              | 0.090  | 0.041      |
| L1/1Et  | 0.34               | 0.384  |            | L13/1Et | 0.715              | 0.844 | 0.981      | L13/1Et | 0.395             | 0.474  | 0.548      |
| L3/1Et  | 1.03               | 1.052  |            | L13/1Pr | 0.935              | 0.792 | 0.745      | L13/1Pr | 0.715             | 0.653  | 0.579      |
| L6/1Pr  | 0.795              | 0.622  |            | L14/1Et | 1.135              | 1.181 | 1.697      | L14/1Et | 0.705             | 0.702  | 0.999      |
| L7/1Et  | 0.06               | 0.117  |            | L14/1Pr | 1.57               | 1.571 | 1.640      | L14/1Pr | 1.2               | 1.180  | 1.138      |
| L12/1Pr | -0.145             | -0.089 |            | L15/1Pr | 1.84               | 1.927 | 2.237      | L15/1Pr | 0.945             | 0.921  | 0.834      |
| L13/1Et | 0.715              | 0.964  |            | L16/1Pr | 3                  | 2.706 | 1.013      | L16/1Pr | 1.46              | 1.447  | 1.201      |
| L13/1Pr | 0.935              | 0.737  |            | L1/1Et  | 0.34               | 0.238 |            | L1/1Et  | 0.41              | 0.554  |            |
| L14/1Et | 1.135              | 1.100  |            | L3/1Et  | 1.03               | 0.451 |            | L3/1Et  | 0.995             | 0.828  |            |
| L14/1Pr | 1.57               | 0.873  |            | L6/1Pr  | 0.795              | 0.792 |            | L6/1Pr  | 0.32              | 0.338  |            |
| L15/1Et | 1.78               | 0.964  |            | L7/1Et  | 0.06               | 0.056 |            | L7/1Et  | 0.03              | 0.037  |            |
| L15/1Pr | 1.84               | 0.737  |            | L12/1Pr | -0.145             | 0.126 |            | L12/1Pr | 0.28              | 0.218  |            |
| L16/1Et | 3                  | 1.100  |            | L15/1Et | 1.78               | 1.978 |            | L15/1Et | 0.8               | 0.742  |            |
| L16/1Pr | 3                  | 0.873  |            | L16/1Et | 3                  | 2.315 |            | L16/1Et | 1.025             | 0.969  |            |
| L17/1Et | 1.82               |        |            | L17/1Et | 1.82               | 2.014 |            | L17/1Et | 1.62              | 0.684  |            |
| L17/1Pr | 3                  |        |            | L17/1Pr | 3                  | 1.923 |            | L17/1Pr | 2.59              | 0.863  |            |
| L18/1Et | 3                  |        |            | L18/1Et | 3                  | 1.695 |            | L18/1Et | 0.66              | 0.374  |            |
| L18/1Pr | 3                  |        |            | L18/1Pr | 3                  | 1.603 |            | L18/1Pr | 1.18              | 0.553  |            |



**Table S7. Data of the reactions using valine derived ligand *R* and predicted values (external validation).**

Constitutional selectivity (b/l) and diastereoselectivity (dr) of products **2Et** and **2Pr** are shown as  $\Delta\Delta G^\ddagger$  values (kcal/mol) used as the target variables for the regression analysis (**Exp.**). Predicted values (**Pred.**) and predicted values from leave-one-out cross-validation [**Pred. (CV)**] are also shown. Training and test samples are highlighted by yellow and purple respectively. Ligands designed are highlighted by green. **L18** is the optimum ligand for the reactions using valine derived ligand *R*. Predicted and measured  $\Delta\Delta G^\ddagger$  values in the reactions using the template and designed molecules are highlighted by red.

|         | 32 reactions (b/l) |        |            | 32 reactions (dr) |       |            |
|---------|--------------------|--------|------------|-------------------|-------|------------|
|         | Exp.               | Pred.  | Pred. (CV) | Exp.              | Pred. | Pred. (CV) |
| L1/1Pr  | 0.6                | 0.607  | 0.609      | 1.465             | 1.489 | 1.544      |
| L2/1Et  | 0.575              | 0.590  | 0.604      | 1.225             | 1.279 | 1.346      |
| L2/1Pr  | 0.625              | 0.607  | 0.596      | 1.63              | 1.553 | 1.475      |
| L3/1Pr  | 0.99               | 1.011  | 1.022      | 1.485             | 1.493 | 1.497      |
| L4/1Et  | 1.045              | 0.994  | 0.955      | 1.215             | 1.218 | 1.221      |
| L4/1Pr  | 0.98               | 1.011  | 1.029      | 1.505             | 1.493 | 1.487      |
| L5/1Et  | 0.905              | 0.907  | 0.832      | 1.535             | 1.500 | 1.465      |
| L5/1Pr  | 0.945              | 0.927  | 0.904      | 1.795             | 1.783 | 1.767      |
| L6/1Et  | 0.83               | 0.833  | 0.910      | 1.495             | 1.497 | 1.502      |
| L7/1Pr  | -0.24              | -0.084 | 0.003      | 1.015             | 1.082 | 1.117      |
| L8/1Et  | 0.03               | -0.100 | -0.152     | 0.705             | 0.807 | 0.885      |
| L8/1Pr  | -0.03              | -0.084 | -0.100     | 1.23              | 1.082 | 0.997      |
| L9/1Et  | -0.28              | -0.212 | -0.133     | 0.765             | 0.805 | 0.841      |
| L9/1Pr  | -0.26              | -0.196 | -0.121     | 1.06              | 1.079 | 1.102      |
| L10/1Et | -0.06              | -0.101 | -0.156     | 0.93              | 0.897 | 0.857      |
| L10/1Pr | -0.06              | -0.084 | -0.118     | 1.19              | 1.172 | 1.148      |
| L11/1Et | -0.26              | -0.253 | -0.262     | 0.83              | 0.833 | 0.840      |
| L11/1Pr | -0.28              | -0.237 | -0.199     | 1.125             | 1.108 | 1.087      |
| L12/1Et | -0.03              | -0.032 | -0.216     | 0.725             | 0.740 | 0.842      |
| L13/1Et | 0.95               | 1.153  | 1.369      | 1.42              | 1.313 | 1.179      |
| L13/1Pr | 1.38               | 1.170  | 0.951      | 1.475             | 1.588 | 1.719      |
| L14/1Et | 1.53               | 1.544  | 2.438      | 1.585             | 1.573 | 1.456      |
| L14/1Pr | 3                  | 2.964  | 1.547      | 1.74              | 1.746 | 1.851      |
| L15/1Pr | 2.315              | 2.303  | 2.168      | 0.88              | 0.892 | 1.607      |
| L16/1Pr | 3                  | 2.962  | 1.430      | 1.55              | 1.555 | 1.634      |
| L1/1Et  | 0.46               | 0.590  |            | 1.13              | 1.215 |            |
| L3/1Et  | 1.025              | 0.726  |            | 1.185             | 1.218 |            |
| L6/1Pr  | 0.88               | 0.853  |            | 1.825             | 1.771 |            |
| L7/1Et  | -0.28              | -0.212 |            | 0.775             | 0.715 |            |
| L12/1Pr | -0.12              | -0.032 |            | 1.32              | 1.015 |            |
| L15/1Et | 1.965              | 2.286  |            | 0.72              | 0.629 |            |
| L16/1Et | 3                  | 2.677  |            | 1.375             | 1.126 |            |
| L17/1Et | 3                  | 2.122  |            | 0.26              | 0.629 |            |
| L17/1Pr | 3                  | 2.139  |            | 0.41              | 0.904 |            |
| L18/1Et | 3                  | 2.444  |            | 1.92              | 1.569 |            |
| L18/1Pr | 3                  | 2.461  |            | 1.92              | 1.844 |            |

### Discussion about conformers

Here, we discuss conformers. Our analysis employed intermediate structures in the selectivity-determining step. Complexation with the Ir salt largely reduces conformational flexibility of the phosphoramidite ligands and the substrates. In some cases, however, conformers with similar energies were found through conformational analysis and the result of the MFA will change depending on conformers. In such a case, we selected conformers according to our intuition as described below. **L18/1Et** and **L18/1Pr** are included in the MFA shown on the next page (fig. S14). Directions of *t*Bu moiety in the most stable conformers **L18/1Et\_1** and **L18/1Pr\_1** were different. Thus, we employed **L18/1Et\_4** for the analysis that had the same conformation with the most stable conformer of **L18/1Pr**.

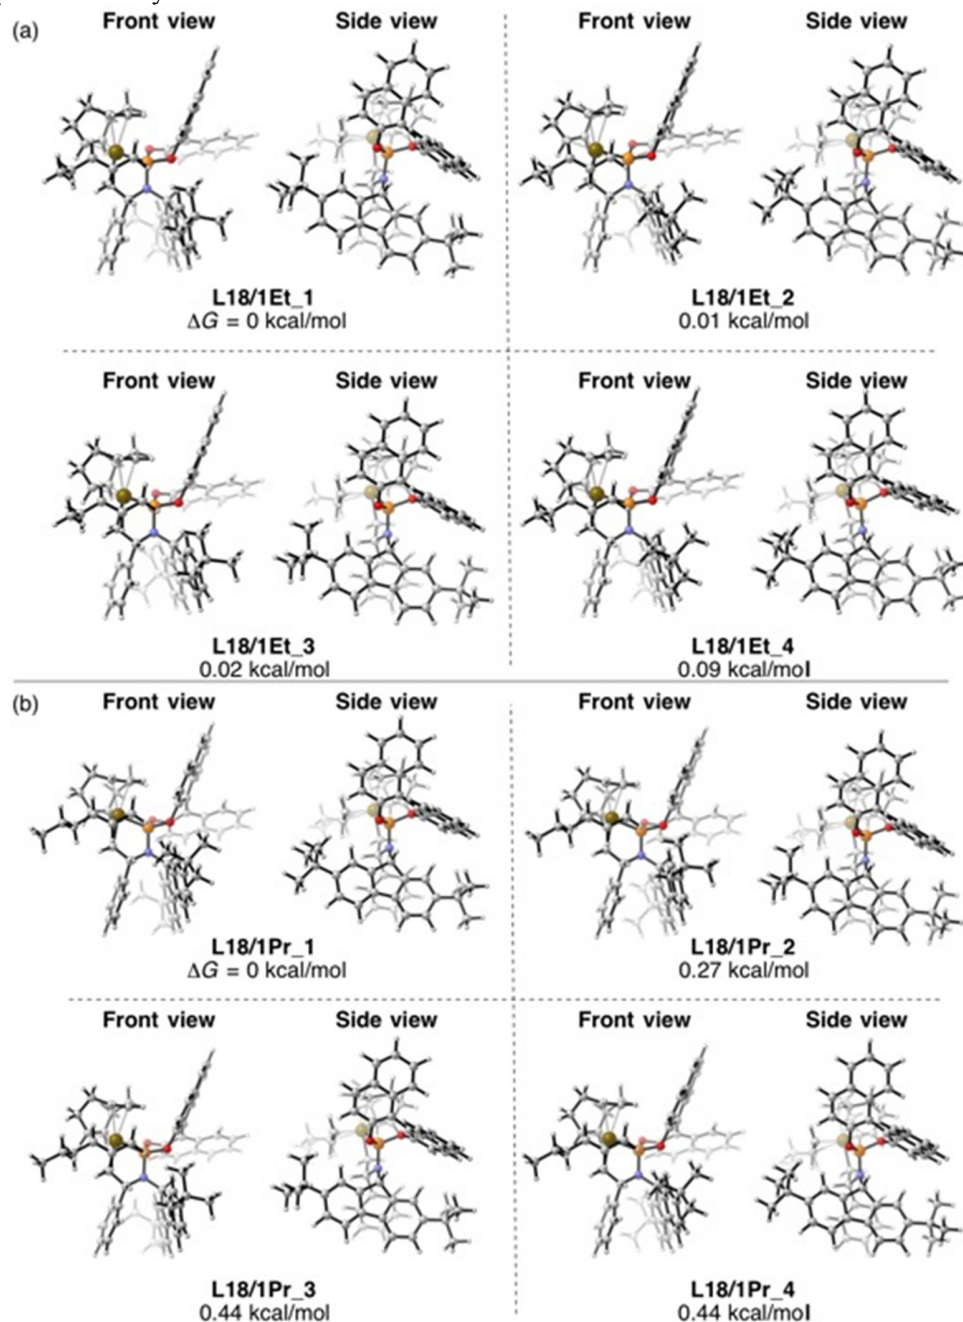

Fig. S13. Conformers of (a) L18/1Et and (b) L18/1Pr with relative free energies.

## Another design pathway

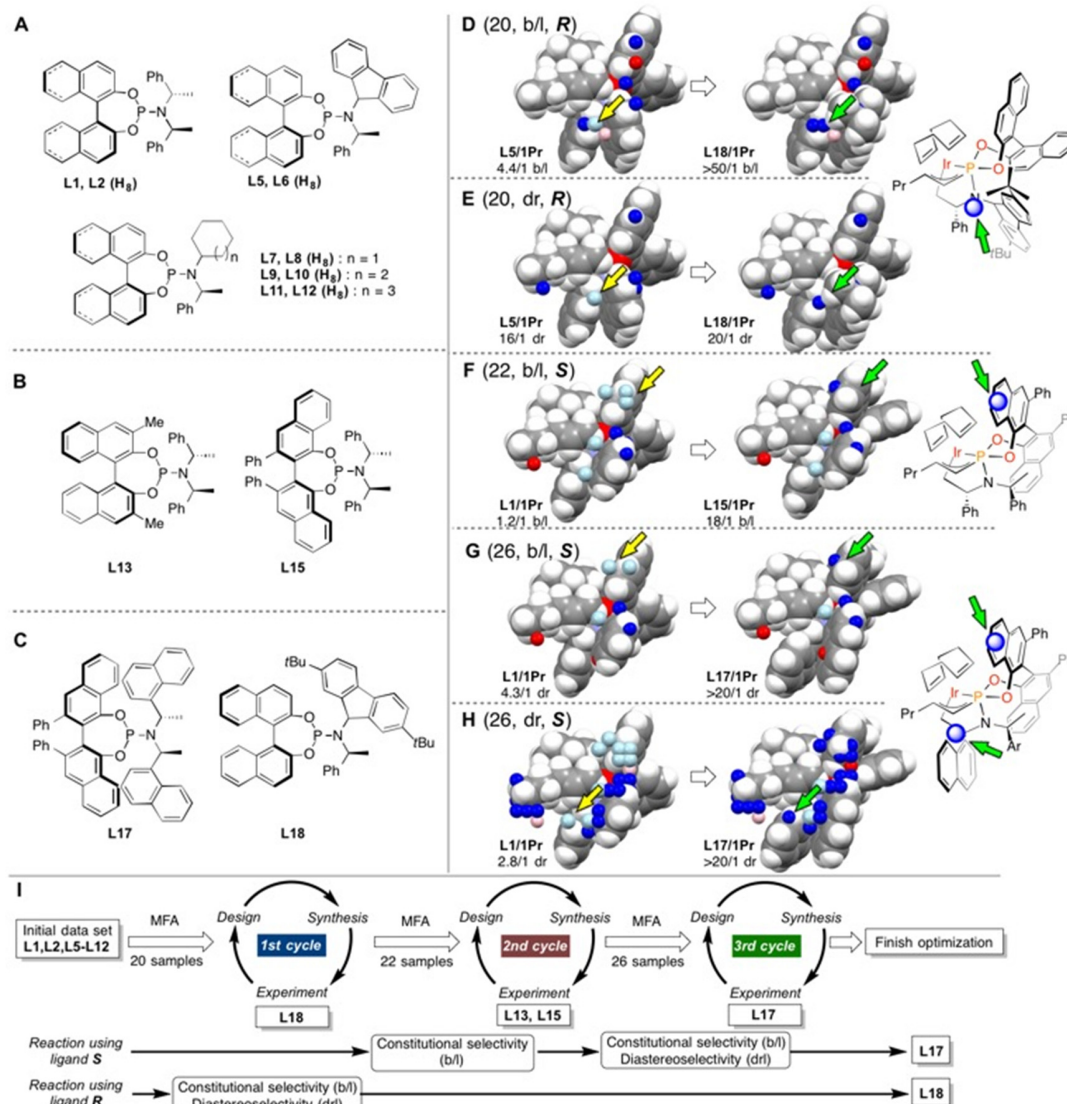

**Fig. S14.** Another design pathway. **(A)** An initial training set. **(B), (C)** Designed ligands. **(D)–(H)** Important structural information (threshold = 0.01) shown on the template molecules (left sides) and the designed molecules (right sides). Structural information shown in fig S14H was extracted using Elastic Net ( $\alpha = 0.4$ ). All the other information was extracted by LASSO. **(I)** Overall design flow.

In this design pathway, first, we performed the MFA using the 20 reactions with the 10 phosphoramidite ligands shown in fig. S14A. For b/l and dr in the reactions using ligand **R**, a light blue point existed around the 2-position of the fluorene moiety of **L5/1Pr** as shown in figs. S14D, S14E and S15. Thus, we designed **L18/1Pr** by introducing a *t*Bu group at the 2-position of the fluorene moiety of **L5/1Pr**. We again performed MFA using the 22 reactions including those with ligand **L18**. As shown in figs. S14F and S16, we could design **L13** and **L15** from **L1/1Pr** based on the information extracted from b/l data in the reactions using the ligand **S**. We then performed the MFA using the 26 reactions. As shown in figs. S14G, S14H and S17, we could design **L17** from **L1/1Pr** based on the information extracted from b/l and dr data in the reactions using ligand **S**. Coefficients of determination calculated from the resulting regression models used for the design are shown in fig. S18 along with plots of the measured and predicted values.

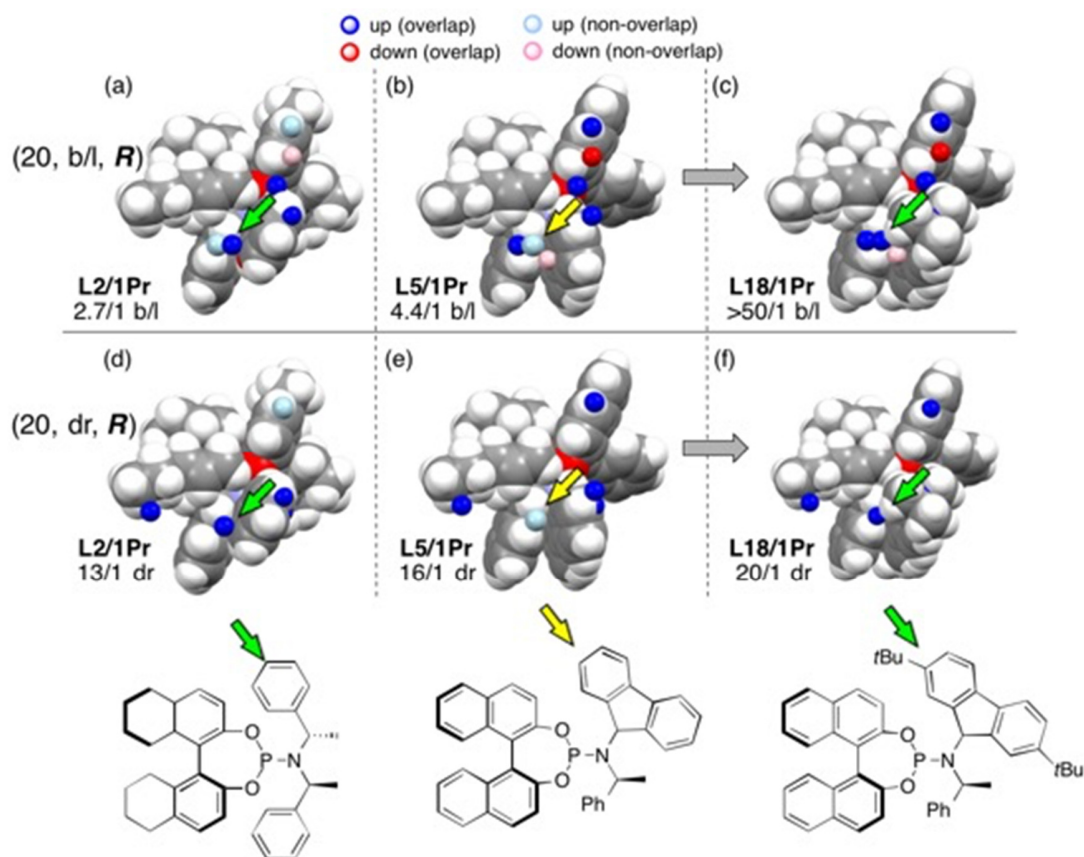

**Fig. S15.** Results of the MFA using b/l and dr data obtained from the 20 reactions with valine ligand **R**. (a), (d) The origin of the blue point used for the molecular design. (b), (e) Design templates. (c), (f) Designed molecules.

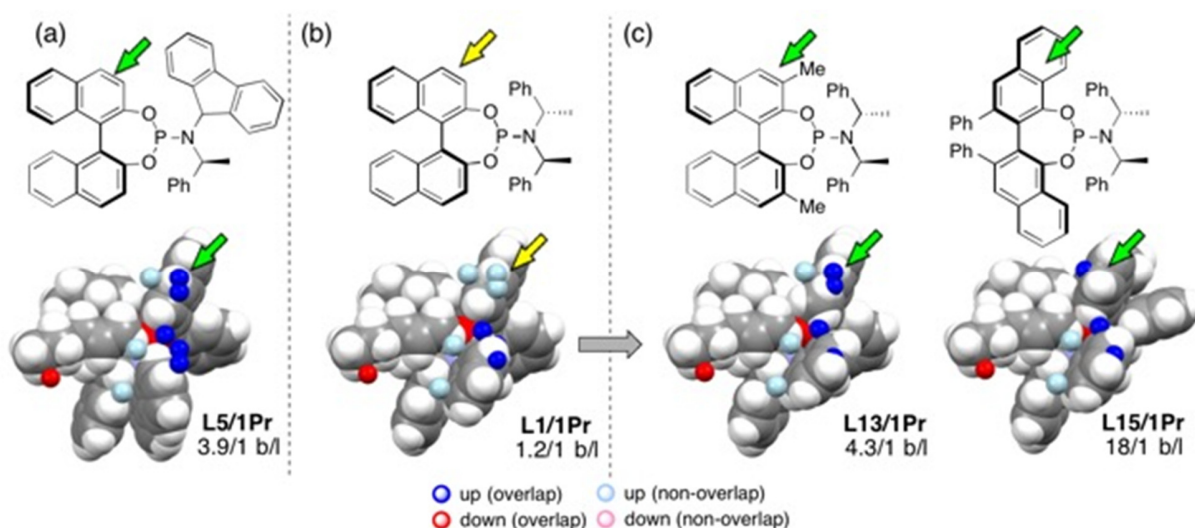

**Fig. S16.** Results of the MFA using b/l data obtained from the 22 reactions with valine ligand **S**. (a), The origin of the blue point used for the molecular design. (b) Design templates. (c) Designed molecules.



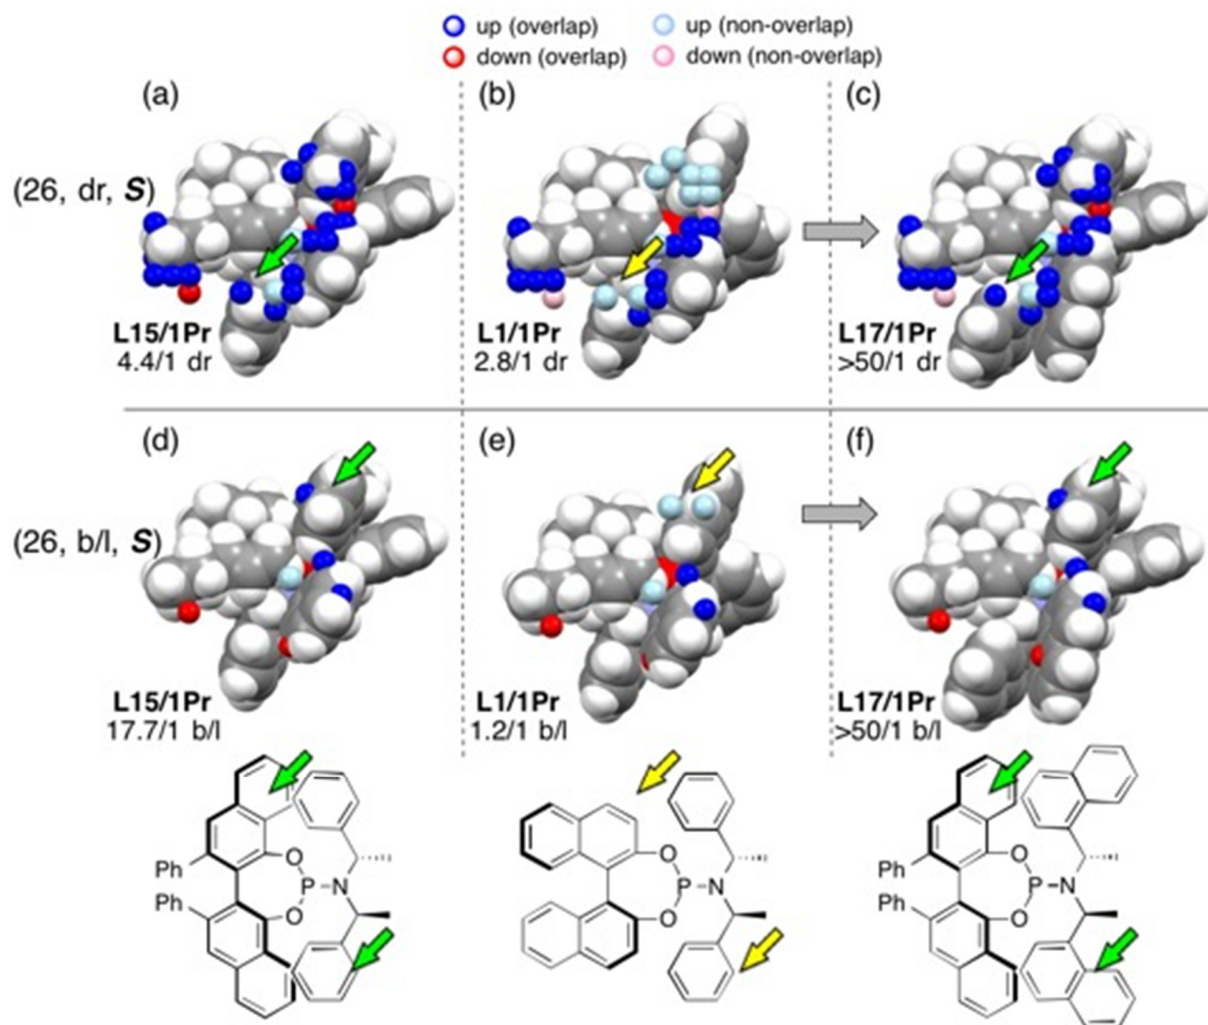

**Fig. S17.** Results of the MFA using b/l and dr data obtained from the 26 reactions with valine ligand **S**. (a), (d) The origin of the blue point used for the molecular design. (b), (e) Design templates. (c), (f) Designed molecules.

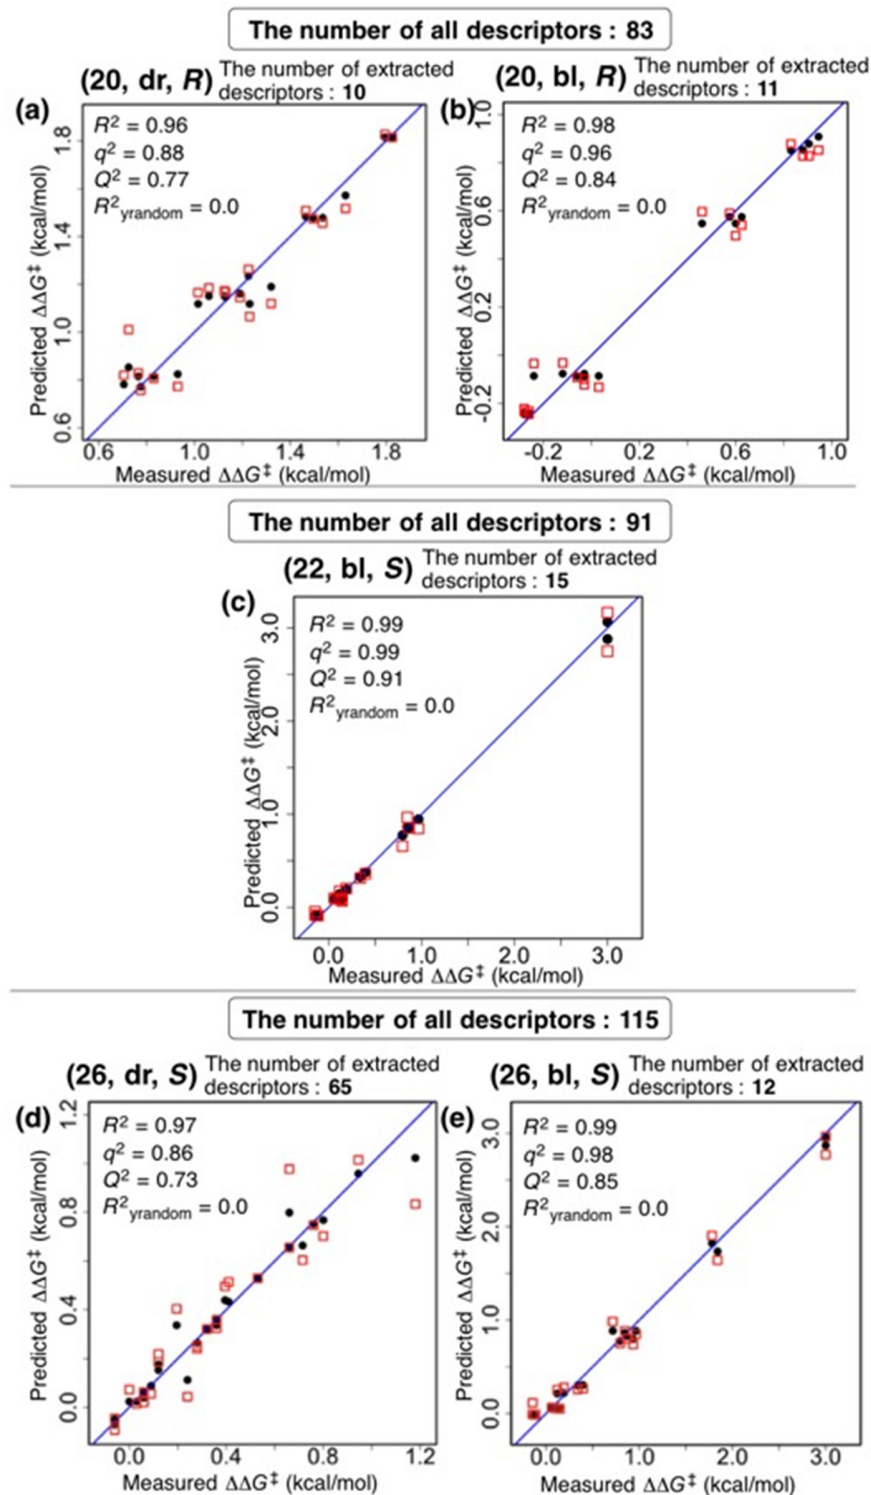

**Fig. S18.** Results of the MFA in another design pathway. (a)–(e) Plots of the predicted (black dots) and the leave-one-out predicted (red squares) vs. measured  $\Delta\Delta G^\ddagger$  values.  $R^2$  : Coefficient of determination  $q^2$  : Leave-one-out cross-validated coefficient of determination.  $Q^2$  : 4-fold cross-validated coefficient of determination.  $R^2_{\text{yrandom}}$ : Coefficient of determination calculated by y-randomization. The blue line is the  $x = y$  line

**Table S8. Data of the reactions using valine derived ligand *S* and predicted values (another design pathway).**

Constitutional selectivity (b/l) and diastereoselectivity (dr) of products **2Et** and **2Pr** are shown as  $\Delta\Delta G^\ddagger$  values (kcal/mol), which were used as the target variables for the regression analysis (**Exp.**). Predicted values (**Pred.**) and predicted values from leave-one-out cross-validation [**Pred. (CV)**] are also shown. Ligands for the 1st MFA are highlighted by yellow. Ligands designed at the 1st MFA are highlighted by green. The 2nd MFA was performed including the designed ligands. **L17** is the optimum ligand for the reactions using valine derived ligand *S*. Predicted and measured  $\Delta\Delta G^\ddagger$  values of the reactions using the template and designed molecules are highlighted by red.

|         | 22 reactions (b/l) |        |            | 26 reactions (b/l) |        |            | 26 reactions (dr) |        |            |
|---------|--------------------|--------|------------|--------------------|--------|------------|-------------------|--------|------------|
|         | Exp.               | Pred.  | Pred. (CV) | Exp.               | Pred.  | Pred. (CV) | Exp.              | Pred.  | Pred. (CV) |
| L1/IEt  | 0.34               | 0.327  | 0.314      | 0.34               | 0.301  | 0.257      | 0.41              | 0.433  | 0.514      |
| L1/1Pr  | 0.12               | 0.143  | 0.173      | 0.12               | 0.214  | 0.254      | 0.66              | 0.658  | 0.655      |
| L2/IEt  | 0.395              | 0.375  | 0.361      | 0.395              | 0.305  | 0.267      | 0.53              | 0.528  | 0.529      |
| L2/1Pr  | 0.19               | 0.191  | 0.201      | 0.19               | 0.218  | 0.280      | 0.76              | 0.752  | 0.746      |
| L5/IEt  | 0.965              | 0.946  | 0.846      | 0.965              | 0.886  | 0.848      | 0.06              | 0.060  | 0.062      |
| L5/1Pr  | 0.865              | 0.856  | 0.850      | 0.865              | 0.830  | 0.801      | 0.36              | 0.357  | 0.359      |
| L6/IEt  | 0.845              | 0.864  | 0.965      | 0.845              | 0.864  | 0.885      | 0.03              | 0.023  | 0.072      |
| L6/1Pr  | 0.795              | 0.775  | 0.656      | 0.795              | 0.776  | 0.754      | 0.32              | 0.320  | 0.321      |
| L7/IEt  | 0.06               | 0.092  | 0.098      | 0.06               | 0.063  | 0.063      | 0.03              | 0.023  | 0.015      |
| L7/1Pr  | -0.12              | -0.092 | -0.088     | -0.12              | -0.024 | -0.013     | 0.195             | 0.336  | 0.404      |
| L8/IEt  | 0.145              | 0.092  | 0.070      | 0.145              | 0.063  | 0.051      | 0.24              | 0.112  | 0.043      |
| L8/1Pr  | -0.145             | -0.092 | -0.084     | -0.145             | -0.024 | -0.009     | 0.36              | 0.336  | 0.325      |
| L9/IEt  | 0.09               | 0.092  | 0.093      | 0.09               | 0.063  | 0.059      | -0.06             | -0.050 | -0.046     |
| L9/1Pr  | -0.12              | -0.092 | -0.088     | -0.12              | -0.024 | -0.013     | 0.12              | 0.175  | 0.219      |
| L10/IEt | 0.145              | 0.092  | 0.084      | 0.145              | 0.063  | 0.051      | 0.06              | 0.039  | 0.021      |
| L10/1Pr | -0.115             | -0.092 | -0.089     | -0.115             | -0.024 | -0.014     | 0.28              | 0.263  | 0.253      |
| L11/IEt | 0.12               | 0.092  | 0.088      | 0.12               | 0.063  | 0.055      | -0.06             | -0.071 | -0.093     |
| L11/1Pr | -0.12              | -0.092 | -0.088     | -0.12              | -0.024 | -0.013     | 0.12              | 0.153  | 0.186      |
| L12/IEt | 0.12               | 0.092  | 0.088      | 0.12               | 0.063  | 0.055      | 0.09              | 0.088  | 0.055      |
| L12/1Pr | -0.145             | -0.092 | -0.047     | -0.145             | -0.024 | 0.113      | 0.28              | 0.263  | 0.241      |
| L18/IEt | 3                  | 3.066  | 3.166      | 3                  | 2.959  | 2.965      | 0.66              | 0.798  | 0.977      |
| L18/1Pr | 3                  | 2.882  | 2.751      | 3                  | 2.872  | 2.773      | 1.18              | 1.023  | 0.834      |
| L13/IEt | 0.715              | 1.040  |            | 0.715              | 0.886  | 0.986      | 0.395             | 0.439  | 0.496      |
| L13/1Pr | 0.935              | 0.856  |            | 0.935              | 0.799  | 0.740      | 0.715             | 0.664  | 0.603      |
| L15/IEt | 1.78               | 1.064  |            | 1.78               | 1.823  | 1.905      | 0.8               | 0.768  | 0.702      |
| L15/1Pr | 1.84               | 0.880  |            | 1.84               | 1.735  | 1.641      | 0.945             | 0.959  | 1.015      |
| L17/IEt | 1.82               |        |            | 1.82               | 1.823  |            | 1.62              | 0.768  |            |
| L17/1Pr | 3                  |        |            | 3                  | 1.735  |            | 2.59              | 0.992  |            |

**Table S9. Data of the reactions using valine derived ligand *R* and predicted values (another design pathway).**

Constitutional selectivity (b/l) and diastereoselectivity (dr) of products **2Et** and **2Pr** are shown as  $\Delta\Delta G^\ddagger$  values (kcal/mol) used as the target variables for the regression analysis (**Exp.**). Predicted values (**Pred.**) and predicted values from leave-one-out cross-validation [**Pred. (CV)**] are also shown. Ligands for the 1st MFA are highlighted by yellow. Ligands designed at the 1st MFA are highlighted by green. The 2nd MFA was performed including the designed ligands. **L18** is the optimum ligand for the reactions using valine derived ligand *R*. Predicted and measured  $\Delta\Delta G^\ddagger$  values of the reactions using the template and designed molecules are highlighted by red.

|         | 20 reactions (b/l) |        |            | 20 reactions (dr) |       |            |
|---------|--------------------|--------|------------|-------------------|-------|------------|
|         | Exp.               | Pred.  | Pred. (CV) | Exp.              | Pred. | Pred. (CV) |
| L1/1Et  | 0.46               | 0.548  | 0.597      | 1.13              | 1.146 | 1.168      |
| L1/1Pr  | 0.6                | 0.548  | 0.497      | 1.465             | 1.483 | 1.508      |
| L2/1Et  | 0.575              | 0.575  | 0.590      | 1.225             | 1.235 | 1.262      |
| L2/1Pr  | 0.625              | 0.575  | 0.541      | 1.63              | 1.572 | 1.517      |
| L5/1Et  | 0.905              | 0.879  | 0.828      | 1.535             | 1.478 | 1.456      |
| L5/1Pr  | 0.945              | 0.909  | 0.853      | 1.795             | 1.815 | 1.827      |
| L6/1Et  | 0.83               | 0.852  | 0.878      | 1.495             | 1.478 | 1.473      |
| L6/1Pr  | 0.88               | 0.854  | 0.828      | 1.825             | 1.815 | 1.814      |
| L7/1Et  | -0.28              | -0.240 | -0.222     | 0.775             | 0.771 | 0.756      |
| L7/1Pr  | -0.24              | -0.086 | -0.034     | 1.015             | 1.118 | 1.166      |
| L8/1Et  | 0.03               | -0.086 | -0.132     | 0.705             | 0.781 | 0.820      |
| L8/1Pr  | -0.03              | -0.086 | -0.099     | 1.23              | 1.118 | 1.065      |
| L9/1Et  | -0.28              | -0.240 | -0.222     | 0.765             | 0.814 | 0.829      |
| L9/1Pr  | -0.26              | -0.240 | -0.232     | 1.06              | 1.151 | 1.185      |
| L10/1Et | -0.06              | -0.086 | -0.091     | 0.93              | 0.824 | 0.773      |
| L10/1Pr | -0.06              | -0.086 | -0.091     | 1.19              | 1.161 | 1.145      |
| L11/1Et | -0.26              | -0.245 | -0.245     | 0.83              | 0.814 | 0.807      |
| L11/1Pr | -0.28              | -0.245 | -0.234     | 1.125             | 1.151 | 1.173      |
| L12/1Et | -0.03              | -0.076 | -0.122     | 0.725             | 0.853 | 1.011      |
| L12/1Pr | -0.12              | -0.076 | -0.032     | 1.32              | 1.190 | 1.120      |
| L18/1Et | 3                  | 0.936  |            | 1.92              | 1.566 |            |
| L18/1Pr | 3                  | 0.936  |            | 1.92              | 1.903 |            |



### Possible diastereoiduction mechanism

The blue points for b/l were observed near the reactive site that afforded the linear product. Here we explain interpretation of the important structural information for dr. This reaction proceeded via nucleophilic attack of the boron enolate species to the Ir- $\pi$ -allyl complex. For sake of simplicity, here we employ a mononuclear boron enolate structure for the explanation while the structure of the boron enolate species is under discussion. In this section, we performed DFT calculations of the boron enolate structures using the B3LYP functional augmented with Grimme's D3 empirical dispersion term<sup>15</sup>, and 6-31G(d) basis set. Frequency calculations were performed at the same level of theory described above to obtain thermal corrections to the Gibbs free energies. Single point energy calculations were performed with the M06 functional<sup>34</sup> using 6-311++G(d,p) basis set. Solvation effects were included using the SMD<sup>35</sup> solvation model with tetrahydrofuran as the solvent. Although we have not considered the boron enolate structures explicitly, the information about the boron enolates is included in the experimental selectivity data. Therefore, on the basis of the visualized information, we can discuss diastereoiduction mechanisms including the facial selectivity of the boron enolates as shown in figs. S19 and S20.

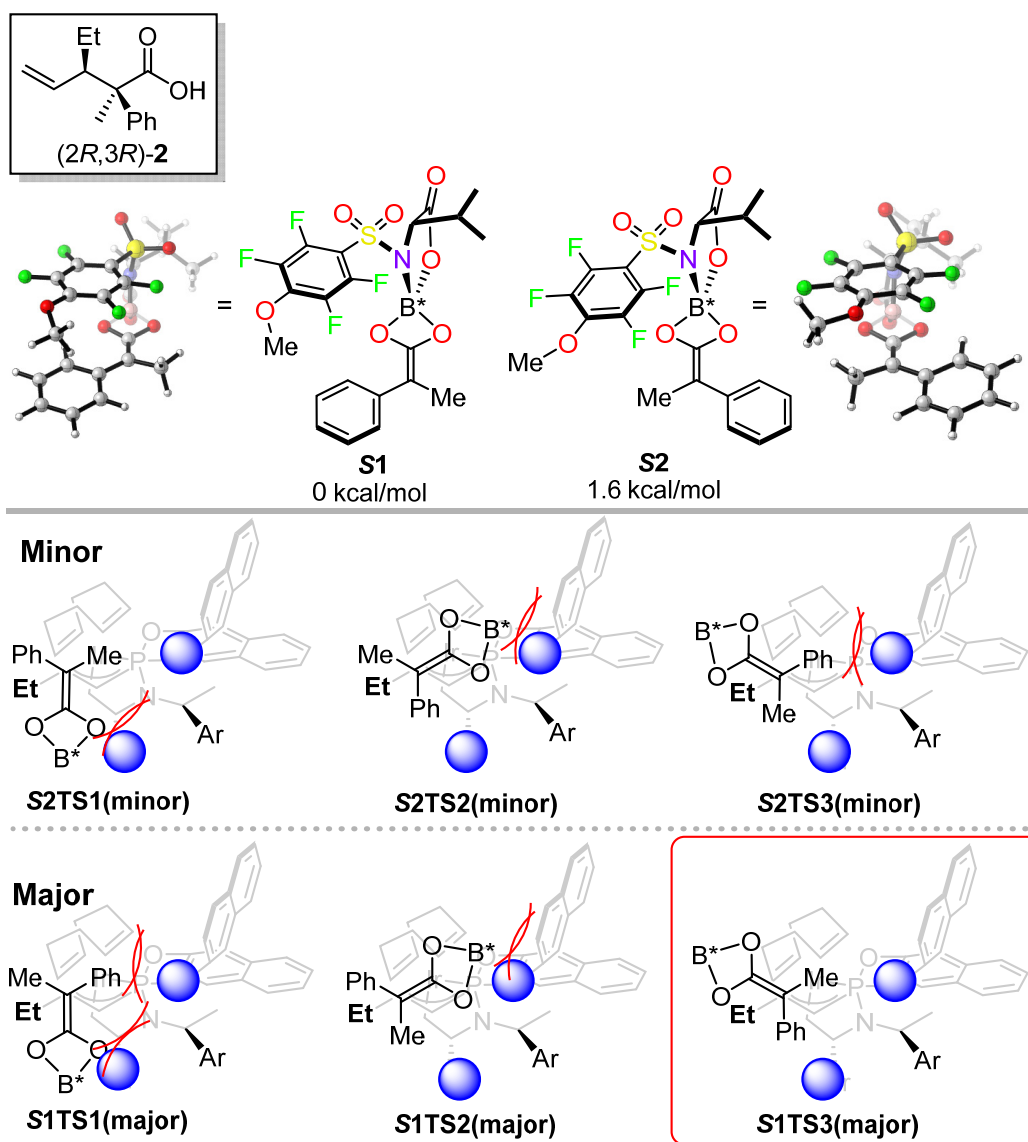

Fig. S19. The possible diastereoiduction mechanism for the reactions using ligand *S*.

**S1** and **S2** are the conformers of the boron enolate having valine-derived ligand **S**. According to the DFT calculations, the conformer **S1**, in which *Si*-face is covered by the substituent on the boron catalyst, is more stable than the conformer **S2**. We showed possible 6 transition state geometries having the staggered conformation along with the important structural information extracted by the MFA of the dr data obtained from the 32 reactions. When substituents are introduced to the blue points, only **S1TS3** is not destabilized by the substituents.

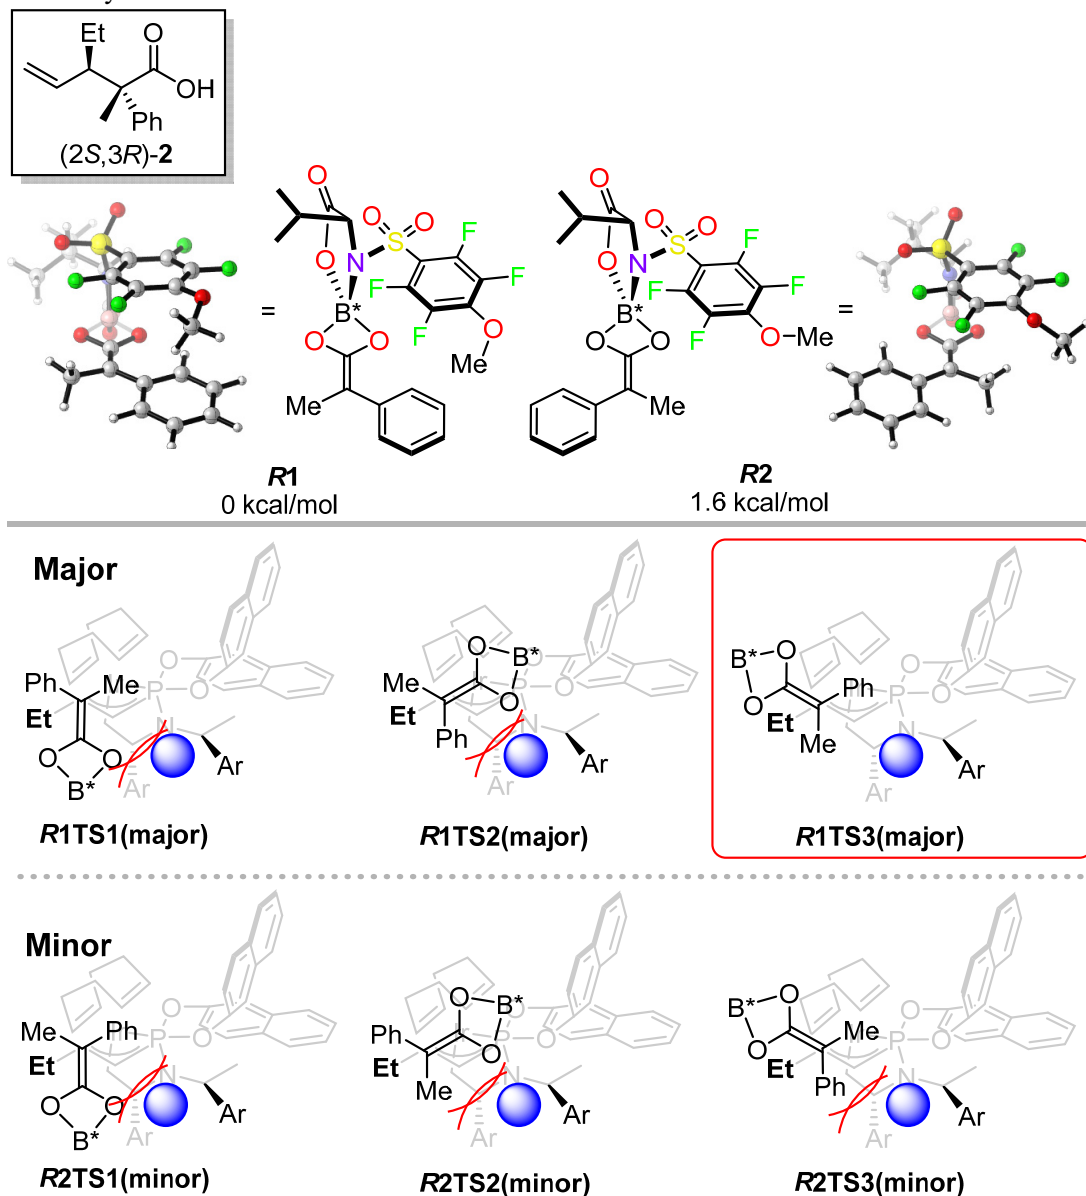

**Fig. S20.** The possible diastereoselection mechanism for the reactions using ligand **R**.

**R1** and **R2** are the conformers of the boron enolate having valine-derived ligand **R**. According to the DFT calculations, the conformer **R1**, in which *Re*-face is covered by the substituent on the boron catalyst, is more stable than the conformer **R2**. We showed possible 6 transition state geometries having the staggered conformation along with the important structural information extracted by the MFA of the dr data obtained from the 32 reactions. When substituents are introduced to the blue points, only **R1TS3** is not destabilized by the substituents.

MFA using descriptor2 (descriptors calculated by removing the columns showing  $|r| \leq 0.3$  ( $|r|$  is an absolute value of a correlation coefficient with the target variables.)

Plots of the measured vs predicted values

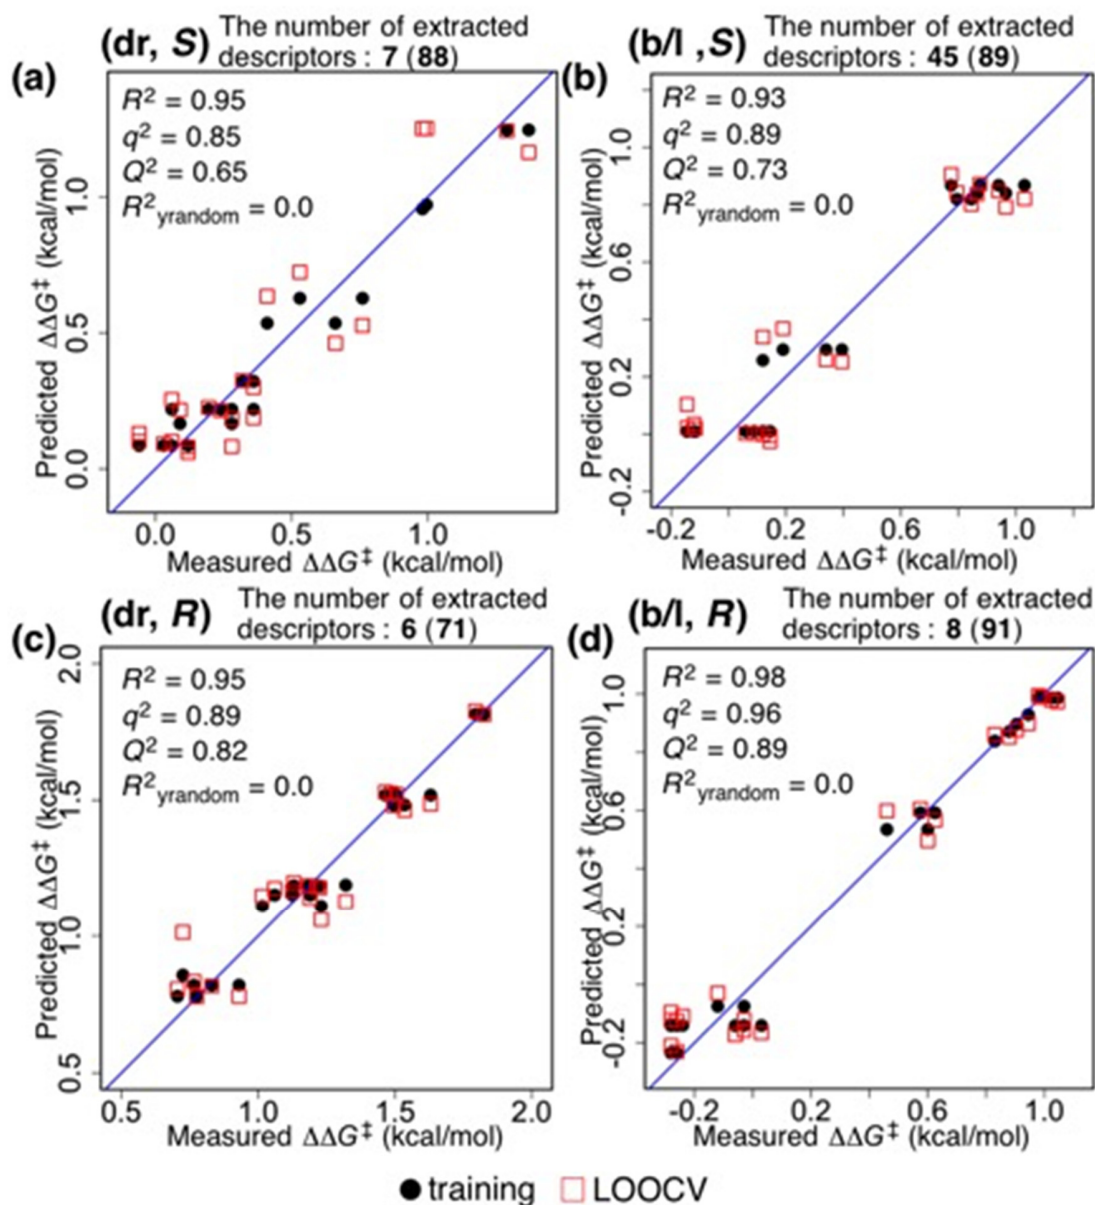

**Fig. S21.** Results of the MFA using 24 training samples and descriptor 2. (a)–(d) Plots of the predicted (black dots) and the leave-one-out predicted (red squares) vs. measured  $\Delta\Delta G^\ddagger$  values. The number in parenthesis is the number of all descriptors.  $R^2$ : Coefficient of determination  $q^2$ : Leave-one-out cross-validated coefficient of determination.  $Q^2$ : 4-fold cross-validated coefficient of determination.  $R^2_{\text{yrandom}}$ : Coefficient of determination calculated by y-randomization. The blue line is the  $x=y$  line.

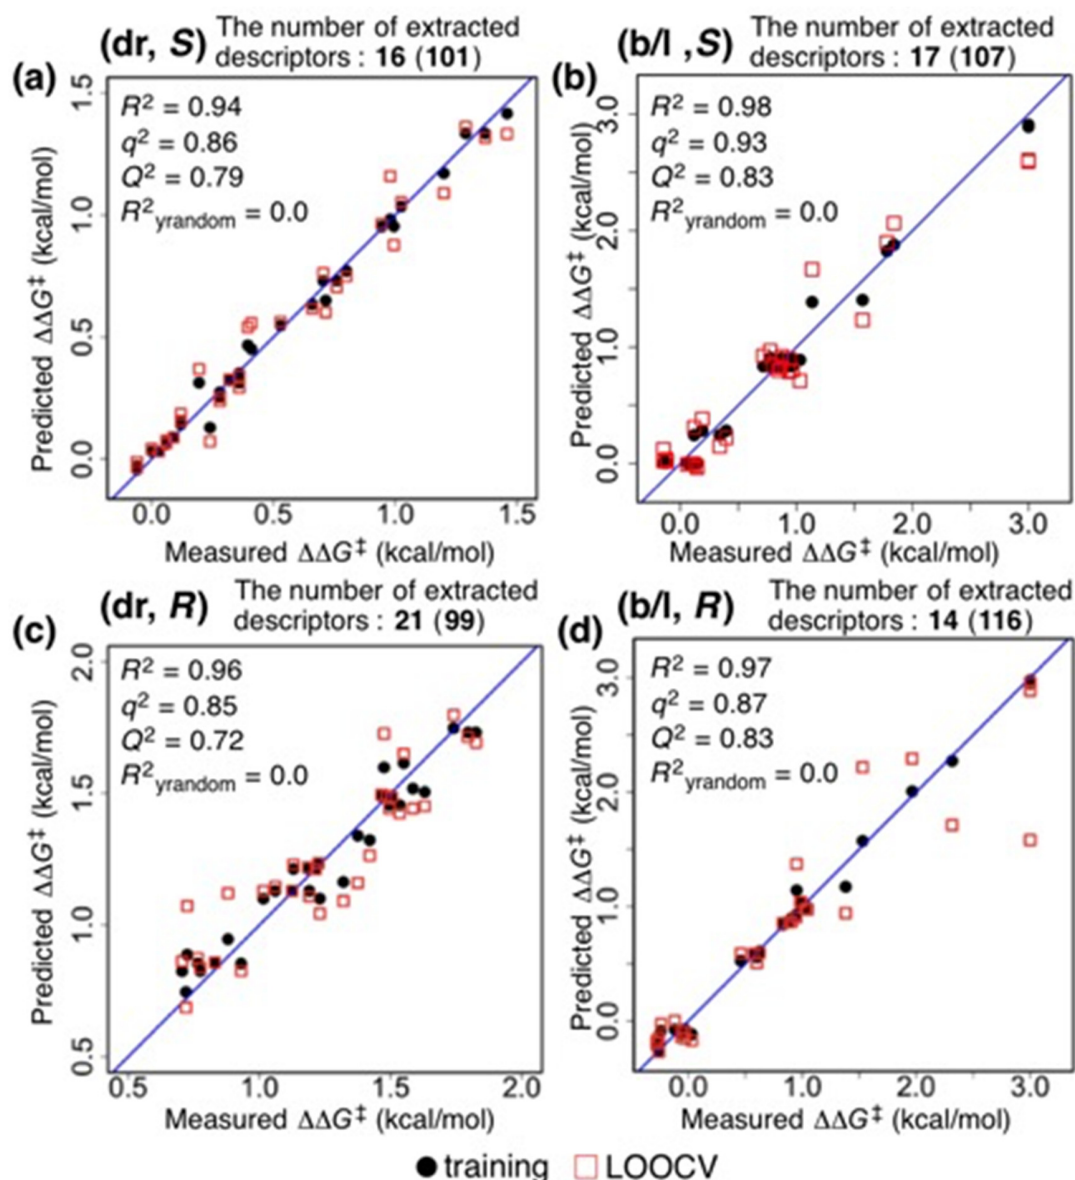

**Fig. S22.** Results of the MFA using 32 training samples and descriptor 2. (a)–(d) Plots of the predicted (black dots) and the leave-one-out predicted (red squares) vs. measured  $\Delta\Delta G^\ddagger$  values. The number in parenthesis is the number of all descriptors.  $R^2$ : Coefficient of determination  $q^2$ : Leave-one-out cross-validated coefficient of determination.  $Q^2$ : 4-fold cross-validated coefficient of determination.  $R^2_{\text{yrandom}}$ : Coefficient of determination calculated by y-randomization. The blue line is the  $x=y$  line.

**Table S10. Data of the reactions using valine derived ligand *S* and predicted values.**

Constitutional selectivity (b/l) and diastereoselectivity (dr) of products **2Et** and **2Pr** are shown as  $\Delta\Delta G^\ddagger$  values (kcal/mol), which were used as the target variables for the regression analysis (**Exp.**). Predicted values (**Pred.**) and predicted values from leave-one-out cross-validation [**Pred. (CV)**] are also shown. Ligands for the 1st MFA are highlighted by yellow. Ligands designed at the 1st MFA are highlighted by green. The 2nd MFA was performed including the designed ligands. **L17** is the optimum ligand for the reactions using valine derived ligand *S*. Predicted and measured  $\Delta\Delta G^\ddagger$  values in the reactions using the template and designed molecules are highlighted by red.

|         | 24 reactions (b/l) |       |            | 24 reactions (dr) |       |            | 32 reactions (b/l) |       |            | 32 reactions (dr) |       |            |
|---------|--------------------|-------|------------|-------------------|-------|------------|--------------------|-------|------------|-------------------|-------|------------|
|         | Exp.               | Pred. | Pred. (CV) | Exp.              | Pred. | Pred. (CV) | Exp.               | Pred. | Pred. (CV) | Exp.              | Pred. | Pred. (CV) |
| L1/1Et  | 0.34               | 0.295 | 0.259      | 0.41              | 0.536 | 0.635      | 0.34               | 0.244 | 0.147      | 0.41              | 0.584 | 0.648      |
| L1/1Pr  | 0.12               | 0.257 | 0.339      | 0.66              | 0.536 | 0.462      | 0.12               | 0.244 | 0.310      | 0.66              | 0.584 | 0.535      |
| L2/1Et  | 0.395              | 0.295 | 0.252      | 0.53              | 0.628 | 0.724      | 0.395              | 0.282 | 0.218      | 0.53              | 0.592 | 0.641      |
| L2/1Pr  | 0.19               | 0.295 | 0.368      | 0.76              | 0.628 | 0.527      | 0.19               | 0.282 | 0.383      | 0.76              | 0.592 | 0.536      |
| L3/1Et  | 1.03               | 0.868 | 0.821      | 0.995             | 0.971 | 1.252      | 1.03               | 0.890 | 0.710      | 0.995             | 0.947 | 0.892      |
| L3/1Pr  | 0.875              | 0.868 | 0.872      | 1.29              | 1.246 | 1.243      | 0.875              | 0.907 | 0.923      | 1.29              | 1.278 | 1.279      |
| L4/1Et  | 0.94               | 0.868 | 0.848      | 0.98              | 0.956 | 1.251      | 0.94               | 0.907 | 0.897      | 0.98              | 1.061 | 1.316      |
| L4/1Pr  | 0.775              | 0.868 | 0.906      | 1.37              | 1.246 | 1.163      | 0.775              | 0.907 | 0.969      | 1.37              | 1.278 | 1.241      |
| L5/1Et  | 0.965              | 0.840 | 0.792      | 0.06              | 0.086 | 0.102      | 0.965              | 0.835 | 0.799      | 0.06              | 0.136 | 0.181      |
| L5/1Pr  | 0.865              | 0.840 | 0.837      | 0.36              | 0.322 | 0.299      | 0.865              | 0.835 | 0.827      | 0.36              | 0.341 | 0.320      |
| L6/1Et  | 0.845              | 0.820 | 0.801      | 0.03              | 0.086 | 0.092      | 0.845              | 0.822 | 0.799      | 0.03              | 0.136 | 0.146      |
| L6/1Pr  | 0.795              | 0.820 | 0.843      | 0.32              | 0.322 | 0.325      | 0.795              | 0.822 | 0.839      | 0.32              | 0.341 | 0.361      |
| L7/1Et  | 0.06               | 0.010 | 0.002      | 0.03              | 0.086 | 0.092      | 0.06               | 0.007 | -0.007     | 0.03              | 0.136 | 0.146      |
| L7/1Pr  | -0.12              | 0.010 | 0.021      | 0.195             | 0.219 | 0.226      | -0.12              | 0.007 | 0.018      | 0.195             | 0.136 | 0.130      |
| L8/1Et  | 0.145              | 0.010 | -0.026     | 0.24              | 0.219 | 0.214      | 0.145              | 0.007 | -0.037     | 0.24              | 0.136 | 0.126      |
| L8/1Pr  | -0.145             | 0.010 | 0.023      | 0.36              | 0.219 | 0.188      | -0.145             | 0.007 | 0.020      | 0.36              | 0.136 | 0.115      |
| L9/1Et  | 0.09               | 0.010 | 0.002      | -0.06             | 0.086 | 0.102      | 0.09               | 0.007 | -0.002     | -0.06             | 0.136 | 0.154      |
| L9/1Pr  | -0.12              | 0.010 | 0.021      | 0.12              | 0.086 | 0.060      | -0.12              | 0.007 | 0.020      | 0.12              | 0.136 | 0.137      |
| L10/1Et | 0.145              | 0.010 | -0.006     | 0.06              | 0.219 | 0.255      | 0.145              | 0.007 | -0.026     | 0.06              | 0.136 | 0.142      |
| L10/1Pr | -0.115             | 0.010 | 0.020      | 0.28              | 0.219 | 0.185      | -0.115             | 0.007 | 0.019      | 0.28              | 0.136 | 0.090      |
| L11/1Et | 0.12               | 0.010 | -0.001     | -0.06             | 0.086 | 0.131      | 0.12               | 0.007 | -0.004     | -0.06             | 0.136 | 0.159      |
| L11/1Pr | -0.12              | 0.010 | 0.036      | 0.12              | 0.086 | 0.080      | -0.12              | 0.007 | 0.036      | 0.12              | 0.136 | 0.137      |
| L12/1Et | 0.12               | 0.010 | -0.001     | 0.09              | 0.167 | 0.217      | 0.12               | 0.007 | -0.004     | 0.09              | 0.186 | 0.254      |
| L12/1Pr | -0.145             | 0.010 | 0.103      | 0.28              | 0.167 | 0.082      | -0.145             | 0.007 | 0.123      | 0.28              | 0.186 | 0.132      |
| L13/1Et | 0.715              | 0.880 |            | 0.395             | 0.403 |            | 0.715              | 0.835 | 0.925      | 0.395             | 0.557 | 0.696      |
| L13/1Pr | 0.935              | 0.880 |            | 0.715             | 0.403 |            | 0.935              | 0.835 | 0.787      | 0.715             | 0.557 | 0.470      |
| L14/1Et | 1.135              | 0.920 |            | 0.705             | 0.838 |            | 1.135              | 1.387 | 1.668      | 0.705             | 0.781 | 0.852      |
| L14/1Pr | 1.57               | 0.920 |            | 1.2               | 1.113 |            | 1.57               | 1.404 | 1.233      | 1.2               | 1.111 | 1.037      |
| L15/1Et | 1.78               | 0.880 |            | 0.8               | 0.403 |            | 1.78               | 1.825 | 1.900      | 0.8               | 0.797 | 0.828      |
| L15/1Pr | 1.84               | 0.880 |            | 0.945             | 0.403 |            | 1.84               | 1.880 | 2.065      | 0.945             | 0.827 | 0.748      |
| L16/1Et | 3                  | 0.920 |            | 1.025             | 0.838 |            | 3                  | 2.892 | 2.607      | 1.025             | 1.051 | 1.094      |
| L16/1Pr | 3                  | 0.920 |            | 1.46              | 1.113 |            | 3                  | 2.909 | 2.591      | 1.46              | 1.382 | 1.318      |
| L17/1Et | 1.82               |       |            | 1.62              |       |            | 1.82               | 1.880 |            | 1.62              | 0.827 |            |
| L17/1Pr | 3                  |       |            | 2.59              |       |            | 3                  | 1.880 |            | 2.59              | 0.827 |            |
| L18/1Et | 3                  |       |            | 0.66              |       |            | 3                  | 1.387 |            | 0.66              | 0.505 |            |
| L18/1Pr | 3                  |       |            | 1.18              |       |            | 3                  | 1.387 |            | 1.18              | 0.505 |            |

**Table S11. Data of the reactions using valine derived ligand *R* and predicted values.**

Constitutional selectivity (b/l) and diastereoselectivity (dr) of products **2Et** and **2Pr** are shown as  $\Delta\Delta G^\ddagger$  values (kcal/mol) used as the target variables for the regression analysis (**Exp.**). Predicted values (**Pred.**) and predicted values from leave-one-out cross-validation [**Pred. (CV)**] are also shown. Ligands for the 1st MFA are highlighted by yellow. Ligands designed at the 1st MFA are highlighted by green. The 2nd MFA was performed including the designed ligands. **L18** is the optimum ligand for the reactions using valine derived ligand *R*. Predicted and measured  $\Delta\Delta G^\ddagger$  values in the reactions using the template and designed molecules are highlighted by red.

|         | 24 reactions (b/l) |        |            | 24 reactions (dr) |       |            | 32 reactions (b/l) |        |            | 32 reactions (dr) |       |            |
|---------|--------------------|--------|------------|-------------------|-------|------------|--------------------|--------|------------|-------------------|-------|------------|
|         | Exp.               | Pred.  | Pred. (CV) | Exp.              | Pred. | Pred. (CV) | Exp.               | Pred.  | Pred. (CV) | Exp.              | Pred. | Pred. (CV) |
| L1/1Et  | 0.46               | 0.535  | 0.598      | 1.13              | 1.187 | 1.198      | 0.46               | 0.574  | 0.610      | 1.13              | 1.188 | 1.232      |
| L1/1Pr  | 0.6                | 0.535  | 0.497      | 1.465             | 1.519 | 1.530      | 0.6                | 0.574  | 0.563      | 1.465             | 1.476 | 1.484      |
| L2/1Et  | 0.575              | 0.592  | 0.605      | 1.225             | 1.187 | 1.179      | 0.575              | 0.574  | 0.572      | 1.225             | 1.250 | 1.273      |
| L2/1Pr  | 0.625              | 0.592  | 0.566      | 1.63              | 1.519 | 1.486      | 0.625              | 0.574  | 0.555      | 1.63              | 1.538 | 1.467      |
| L3/1Et  | 1.025              | 0.986  | 0.978      | 1.185             | 1.187 | 1.187      | 1.025              | 0.983  | 0.977      | 1.185             | 1.235 | 1.299      |
| L3/1Pr  | 0.99               | 0.986  | 0.989      | 1.485             | 1.519 | 1.526      | 0.99               | 0.983  | 0.989      | 1.485             | 1.480 | 1.475      |
| L4/1Et  | 1.045              | 0.986  | 0.972      | 1.215             | 1.187 | 1.181      | 1.045              | 0.983  | 0.970      | 1.215             | 1.192 | 1.178      |
| L4/1Pr  | 0.98               | 0.986  | 0.994      | 1.505             | 1.519 | 1.522      | 0.98               | 0.983  | 0.993      | 1.505             | 1.480 | 1.465      |
| L5/1Et  | 0.905              | 0.896  | 0.876      | 1.535             | 1.483 | 1.464      | 0.905              | 0.894  | 0.846      | 1.535             | 1.492 | 1.475      |
| L5/1Pr  | 0.945              | 0.929  | 0.898      | 1.795             | 1.815 | 1.826      | 0.945              | 0.894  | 0.863      | 1.795             | 1.780 | 1.775      |
| L6/1Et  | 0.83               | 0.838  | 0.861      | 1.495             | 1.483 | 1.480      | 0.83               | 0.869  | 0.896      | 1.495             | 1.492 | 1.492      |
| L6/1Pr  | 0.88               | 0.871  | 0.852      | 1.825             | 1.815 | 1.813      | 0.88               | 0.869  | 0.846      | 1.825             | 1.780 | 1.762      |
| L7/1Et  | -0.28              | -0.140 | -0.095     | 0.775             | 0.779 | 0.778      | -0.28              | -0.073 | -0.056     | 0.775             | 0.796 | 0.803      |
| L7/1Pr  | -0.24              | -0.140 | -0.108     | 1.015             | 1.111 | 1.148      | -0.24              | -0.073 | -0.060     | 1.015             | 1.084 | 1.111      |
| L8/1Et  | 0.03               | -0.140 | -0.166     | 0.705             | 0.779 | 0.807      | 0.03               | -0.073 | -0.090     | 0.705             | 0.796 | 0.832      |
| L8/1Pr  | -0.03              | -0.140 | -0.157     | 1.23              | 1.111 | 1.060      | -0.03              | -0.073 | -0.084     | 1.23              | 1.084 | 1.023      |
| L9/1Et  | -0.28              | -0.141 | -0.121     | 0.765             | 0.820 | 0.834      | -0.28              | -0.073 | -0.056     | 0.765             | 0.842 | 0.862      |
| L9/1Pr  | -0.26              | -0.141 | -0.124     | 1.06              | 1.152 | 1.176      | -0.26              | -0.073 | -0.058     | 1.06              | 1.130 | 1.148      |
| L10/1Et | -0.06              | -0.141 | -0.172     | 0.93              | 0.820 | 0.779      | -0.06              | -0.073 | -0.080     | 0.93              | 0.842 | 0.810      |
| L10/1Pr | -0.06              | -0.141 | -0.172     | 1.19              | 1.152 | 1.141      | -0.06              | -0.073 | -0.080     | 1.19              | 1.130 | 1.109      |
| L11/1Et | -0.26              | -0.234 | -0.229     | 0.83              | 0.820 | 0.817      | -0.26              | -0.073 | -0.058     | 0.83              | 0.842 | 0.845      |
| L11/1Pr | -0.28              | -0.234 | -0.209     | 1.125             | 1.152 | 1.167      | -0.28              | -0.073 | -0.056     | 1.125             | 1.130 | 1.131      |
| L12/1Et | -0.03              | -0.074 | -0.120     | 0.725             | 0.857 | 1.013      | -0.03              | -0.055 | -0.077     | 0.725             | 0.834 | 1.050      |
| L12/1Pr | -0.12              | -0.074 | -0.030     | 1.32              | 1.189 | 1.128      | -0.12              | -0.055 | -0.011     | 1.32              | 1.212 | 1.103      |
| L13/1Et | 0.95               | 0.929  |            | 1.42              | 1.483 |            | 0.95               | 1.123  | 1.311      | 1.42              | 1.305 | 1.226      |
| L13/1Pr | 1.38               | 0.929  |            | 1.475             | 1.815 |            | 1.38               | 1.123  | 0.981      | 1.475             | 1.593 | 1.725      |
| L14/1Et | 1.53               | 0.986  |            | 1.585             | 1.483 |            | 1.53               | 1.766  | 2.340      | 1.585             | 1.527 | 1.436      |
| L14/1Pr | 3                  | 0.986  |            | 1.74              | 1.815 |            | 3                  | 2.629  | 1.544      | 1.74              | 1.772 | 1.833      |
| L15/1Et | 1.965              | 0.929  |            | 0.72              | 1.483 |            | 1.965              | 2.073  | 2.197      | 0.72              | 0.669 | 0.601      |
| L15/1Pr | 2.315              | 0.929  |            | 0.88              | 1.815 |            | 2.315              | 2.073  | 1.947      | 0.88              | 0.957 | 1.052      |
| L16/1Et | 3                  | 0.986  |            | 1.375             | 1.483 |            | 3                  | 2.715  | 2.535      | 1.375             | 1.366 | 1.356      |
| L16/1Pr | 3                  | 0.986  |            | 1.55              | 1.815 |            | 3                  | 2.715  | 2.592      | 1.55              | 1.610 | 1.692      |
| L17/1Et | 3                  |        |            | 0.26              |       |            | 3                  | 2.054  |            | 0.26              | 0.632 |            |
| L17/1Pr | 3                  |        |            | 0.41              |       |            | 3                  | 2.054  |            | 0.41              | 0.920 |            |
| L18/1Et | 3                  |        |            | 1.92              |       |            | 3                  | 2.400  |            | 1.92              | 1.411 |            |
| L18/1Pr | 3                  |        |            | 1.92              |       |            | 3                  | 2.400  |            | 1.92              | 1.699 |            |



## Details of the molecular design

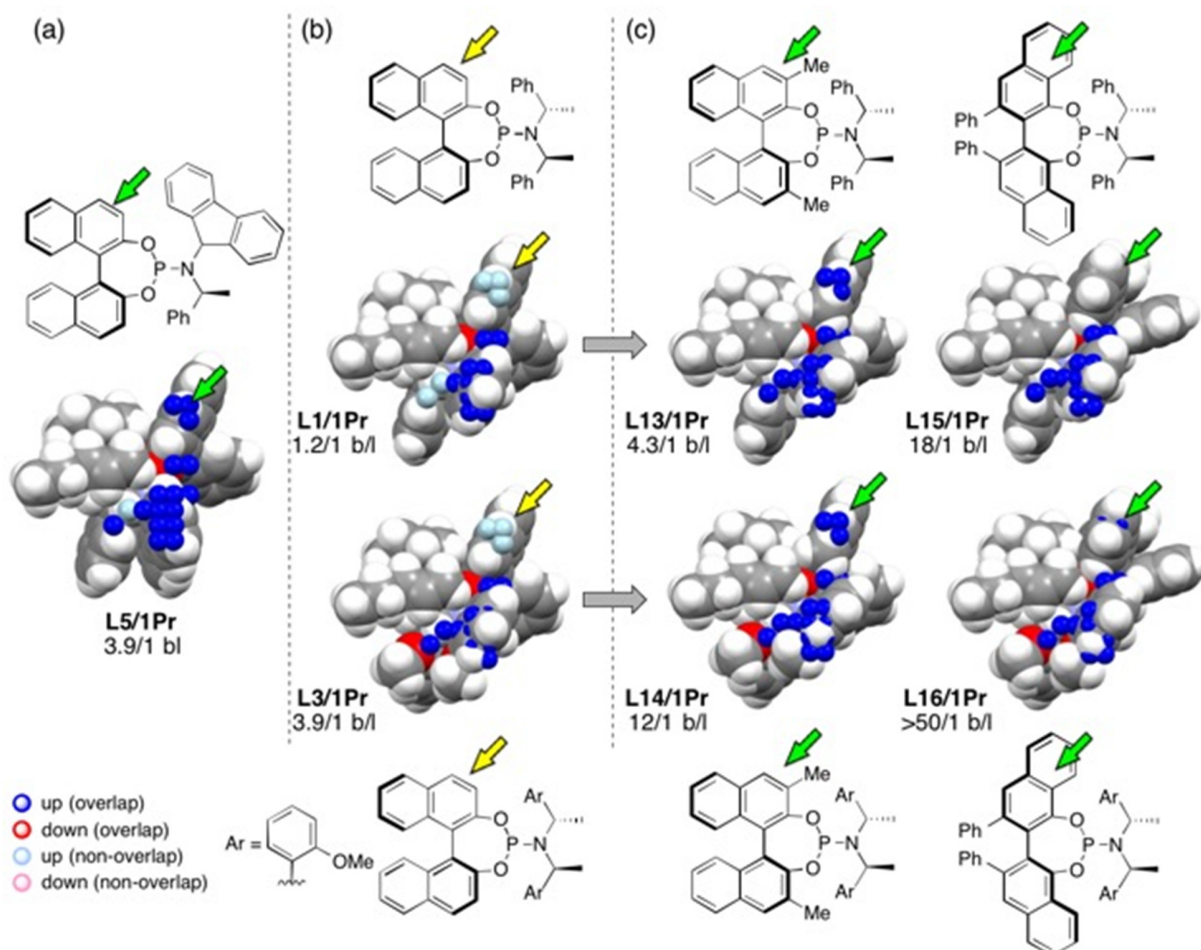

**Fig. S23.** Results of the MFA using b/l data obtained from the 24 reactions with valine ligand **S**. (a) The origin of the blue point used for the molecular design. (b) Design templates. (c) Designed molecules. The structural information shown in this figure was extracted using Elastic Net ( $\alpha = 0.5$ ). The structural information shown in figs. S24 and S25 was extracted using LASSO.

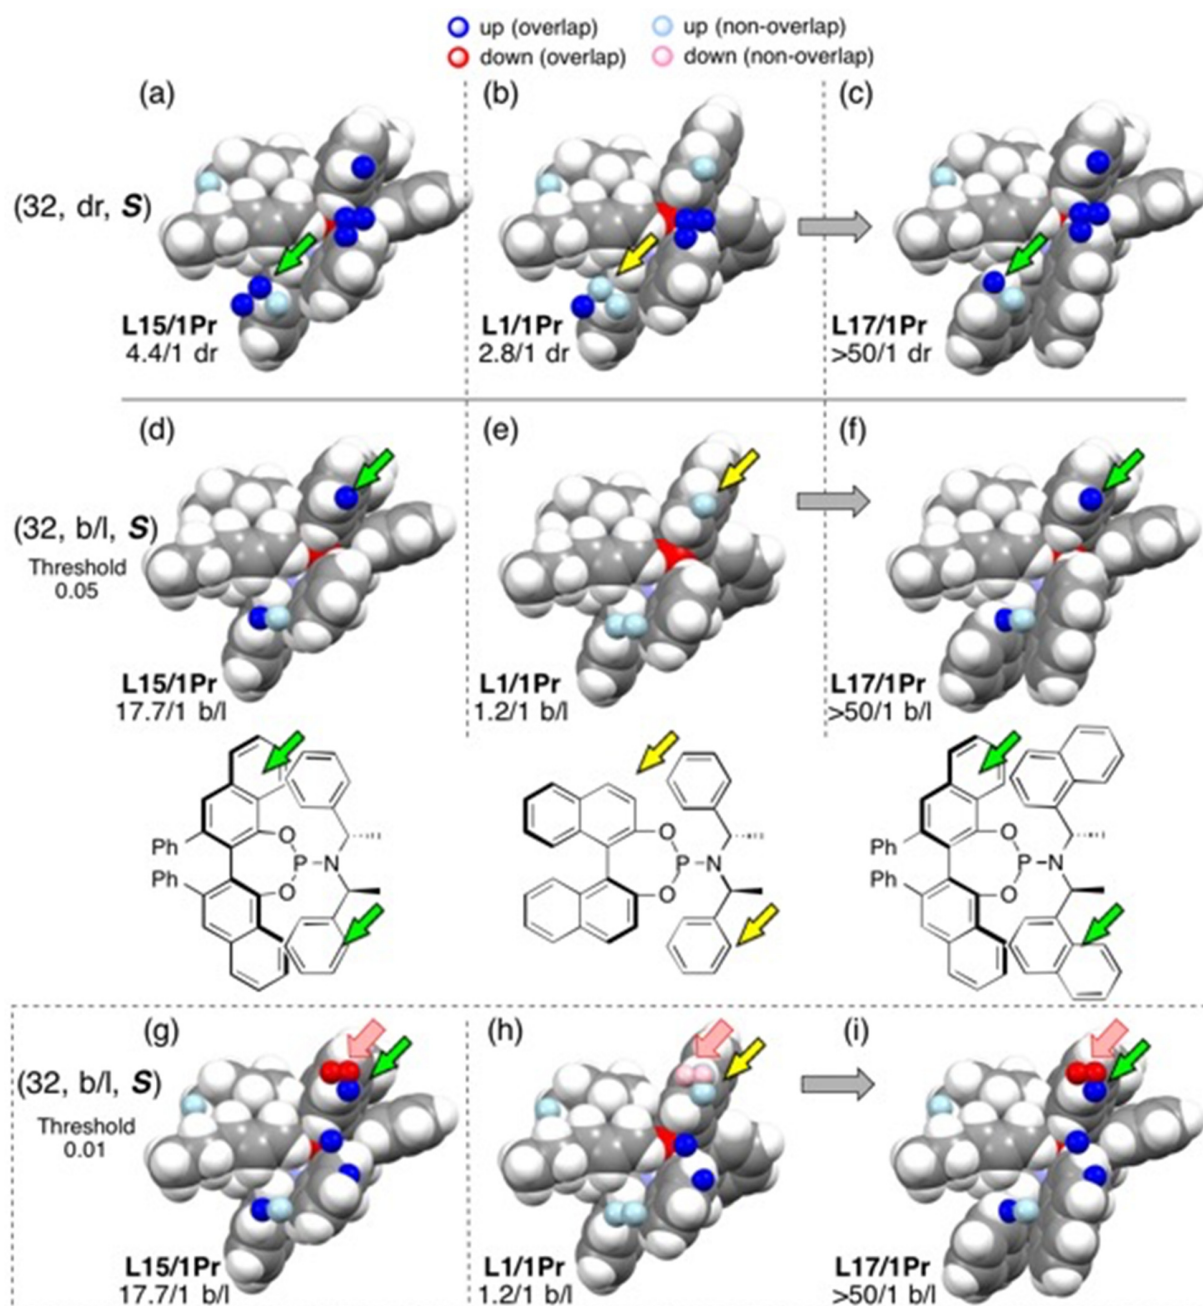

**Fig. S24.** Results of the MFA using b/l and dr data obtained from the 32 reactions with valine ligand **S**. (a), (d), (g) The origin of the blue point used for the molecular design. (b), (e), (h) Design templates. (c), (f), (i) Designed molecules. Although the predicted b/l ratio of **L17/1Pr** ( $\Delta\Delta G^\ddagger = 1.88$  kcal/mol) is higher than that of the template molecule **L1/1Pr** ( $\Delta\Delta G^\ddagger = 0.24$  kcal/mol), **L17/1Pr** overlapped with red points as indicated by red arrow. Thus, for clarity, we set threshold value to 0.05 as shown in Fig. S24d, S24e, and S24f.



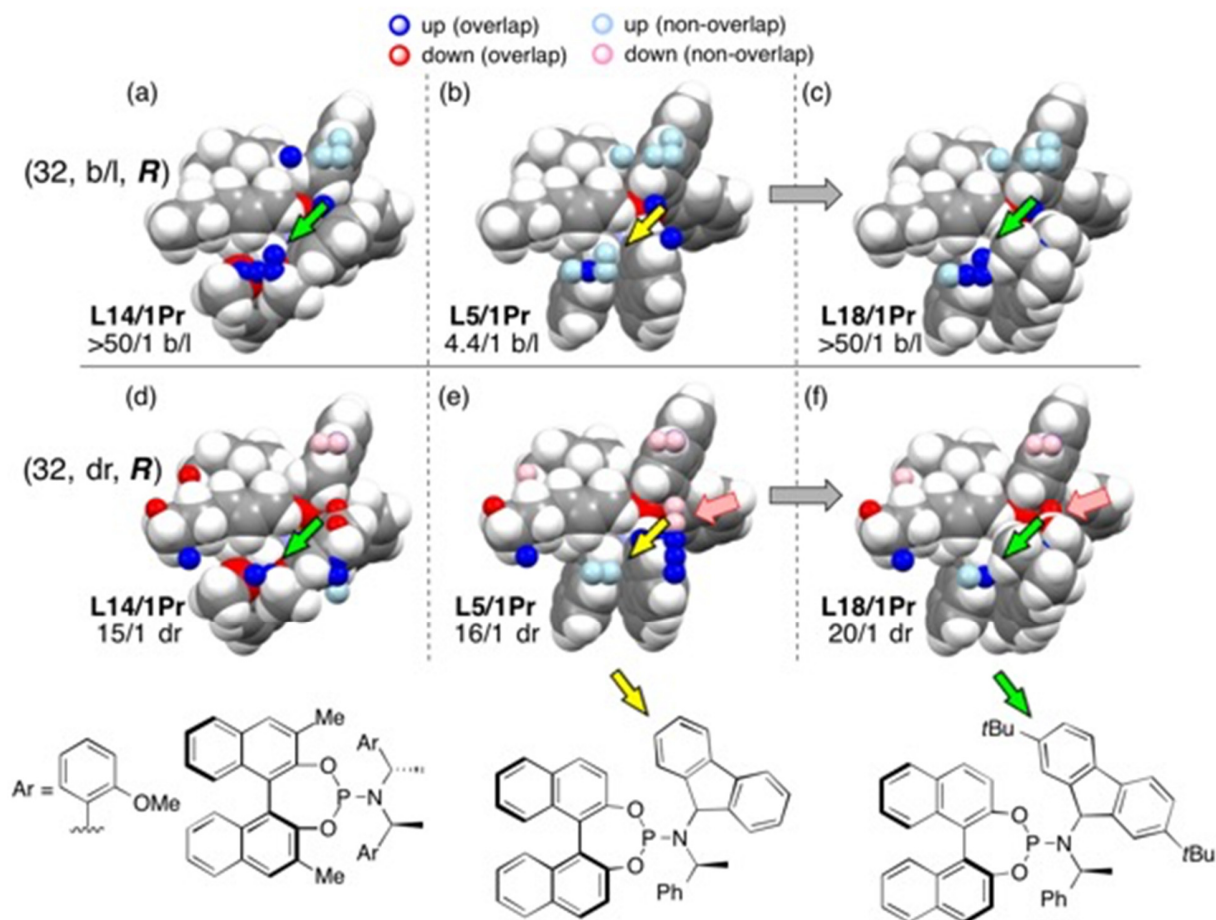

**Fig. S25.** Results of the MFA using b/l and dr data obtained from the 32 reactions with valine ligand *R*. (a), (d) The origin of the blue point used for the molecular design. (b), (e) Design templates. (c), (f) Designed molecules. In the case of the MFA using dr data, **L18/1Pr** overlapped with red points as indicated by a red arrow (Fig. S25f) and the predicted value of **L18/1Pr** ( $\Delta\Delta G^\ddagger = 1.7$  kcal/mol) is lower than that of the design template **L5/1Pr** ( $\Delta\Delta G^\ddagger = 1.78$  kcal/mol) (Table S11). However, the signs of the correlation coefficients of the structural information with target variables (0.309, 0.309) are not consistent with those of the regression coefficients (-0.108, -0.03), meaning low reliability of the structural information (the red points) for the design (see, descriptor 2 of R32dr in text\_test.xlsx. The parameters are highlighted by yellow). In the MFA using descriptor 1, all the signs of the regression coefficients are consistent with those of correlation coefficients. Thus, in this case, we employed the information extracted by the MFA using descriptor 1 for the molecular design.

### MFA using enantioselectivity data

In this study, we mainly focused on b/l ratio and dr data since enantiomeric excess values in the initial training datasets are high (90% ee–99% ee in the 24 reactions using ligand **S** and 92% ee–99% ee in the 24 reactions using ligand **R**). However, we also performed MFA using the enantioselectivity data to keep enantioselectivity excellent. We checked that, compared to the template molecules, the intermediate structures from the designed ligands did not overlap with the further structural information that lowered the enantioselectivity or if the structure overlapped with the structural information corresponding to negative regression coefficients, the decrease of the enantioselectivity was canceled by overlapping with the important structural information corresponding to positive regression coefficients. (figs. S27-S29). We also checked predicted  $\Delta\Delta G^\ddagger$  values of all the designed molecules are over 2.9 kcal/mol [ $>97.8\%$  ee] (Table S12). The information described above also strongly prompted us to synthesize the designed ligands, meaning that the MFA using enantioselectivity data has been also the powerful support to achieve the data-driven optimization of the catalyst structures for stereodivergent asymmetric synthesis.

### Plots of the measured vs predicted values

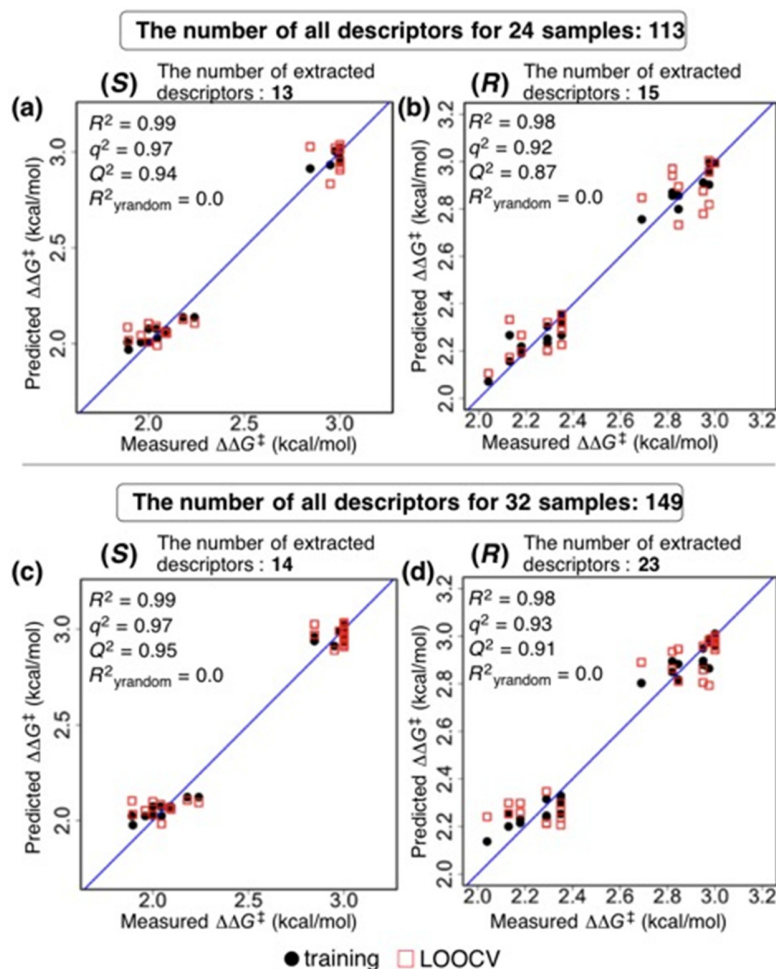

**Fig. S26.** Results of the MFA using enantioselectivity data. (a)–(d) Plots of the predicted (black dots) and the leave-one-out predicted (red squares) vs. measured  $\Delta\Delta G^\ddagger$  values.  $R^2$ : Coefficient of determination  $q^2$ : Leave-one-out cross-validated coefficient of determination.  $Q^2$ : 4-fold cross-validated coefficient of determination.  $R^2_{\text{yrandom}}$ : Coefficient of determination calculated by y-randomization. The blue line is the  $x=y$  line.

**Table S12. Enantioselectivity data and predicted values.**

Enantioselectivity of products **2Et** and **2Pr** are shown as  $\Delta\Delta G^\ddagger$  values (kcal/mol), which were used as the target variables for the regression analysis (**Exp.**). Predicted values (**Pred.**) and predicted values from leave-one-out cross-validation [**Pred. (CV)**] are also shown. Ligands for the 1st MFA are highlighted by yellow. Ligands designed at the 1st MFA were highlighted by green. The 2nd MFA was performed including the designed ligands. Predicted and measured  $\Delta\Delta G^\ddagger$  values in the reactions using the template and designed molecules are highlighted by red.

|         | 24 reactions (S) |       |            | 24 reactions (R) |       |            | 32 reactions (S) |       |            | 32 reactions (R) |       |            |
|---------|------------------|-------|------------|------------------|-------|------------|------------------|-------|------------|------------------|-------|------------|
|         | Exp.             | Pred. | Pred. (CV) |
| L1/1Et  | 2.95             | 2.932 | 2.834      | 2.69             | 2.756 | 2.848      | 2.95             | 2.911 | 2.890      | 2.69             | 2.791 | 2.880      |
| L1/1Pr  | 2.845            | 2.913 | 3.028      | 2.845            | 2.799 | 2.733      | 2.845            | 2.960 | 3.025      | 2.845            | 2.813 | 2.787      |
| L2/1Et  | 3                | 2.942 | 2.907      | 2.82             | 2.870 | 2.941      | 3                | 2.940 | 2.908      | 2.82             | 2.853 | 2.883      |
| L2/1Pr  | 3                | 3.002 | 3.022      | 2.975            | 2.903 | 2.819      | 3                | 2.988 | 2.983      | 2.975            | 2.875 | 2.807      |
| L3/1Et  | 3                | 2.965 | 2.952      | 2.975            | 2.963 | 2.954      | 3                | 2.975 | 2.965      | 2.975            | 2.970 | 2.968      |
| L3/1Pr  | 3                | 3.025 | 3.038      | 2.975            | 2.996 | 3.005      | 3                | 3.023 | 3.033      | 2.975            | 2.992 | 3.000      |
| L4/1Et  | 3                | 2.965 | 2.952      | 2.975            | 2.963 | 2.958      | 3                | 2.975 | 2.965      | 2.975            | 2.970 | 2.965      |
| L4/1Pr  | 3                | 3.025 | 3.038      | 3                | 2.996 | 2.994      | 3                | 3.023 | 3.033      | 3                | 2.992 | 2.988      |
| L5/1Et  | 3                | 2.945 | 2.924      | 2.95             | 2.912 | 2.877      | 3                | 2.938 | 2.920      | 2.95             | 2.924 | 2.861      |
| L5/1Pr  | 3                | 3.004 | 3.011      | 2.845            | 2.856 | 2.895      | 3                | 2.987 | 2.985      | 2.845            | 2.864 | 2.958      |
| L6/1Et  | 3                | 2.945 | 2.906      | 2.95             | 2.912 | 2.780      | 3                | 2.938 | 2.920      | 2.95             | 2.879 | 2.787      |
| L6/1Pr  | 2.975            | 3.004 | 3.021      | 2.82             | 2.856 | 2.970      | 2.975            | 2.987 | 2.990      | 2.82             | 2.892 | 2.967      |
| L7/1Et  | 1.89             | 2.007 | 2.085      | 2.04             | 2.071 | 2.105      | 1.89             | 2.024 | 2.103      | 2.04             | 2.089 | 2.151      |
| L7/1Pr  | 2.24             | 2.136 | 2.106      | 2.13             | 2.267 | 2.333      | 2.24             | 2.122 | 2.093      | 2.13             | 2.260 | 2.320      |
| L8/1Et  | 2.04             | 2.077 | 2.090      | 2.29             | 2.234 | 2.201      | 2.04             | 2.074 | 2.085      | 2.29             | 2.237 | 2.208      |
| L8/1Pr  | 2.18             | 2.136 | 2.124      | 2.35             | 2.267 | 2.227      | 2.18             | 2.122 | 2.107      | 2.35             | 2.260 | 2.218      |
| L9/1Et  | 2                | 2.007 | 2.007      | 2.13             | 2.157 | 2.173      | 2                | 2.024 | 2.030      | 2.13             | 2.170 | 2.195      |
| L9/1Pr  | 2.085            | 2.066 | 2.058      | 2.18             | 2.189 | 2.197      | 2.085            | 2.072 | 2.067      | 2.18             | 2.192 | 2.202      |
| L10/1Et | 2                | 2.077 | 2.105      | 2.35             | 2.320 | 2.290      | 2                | 2.074 | 2.098      | 2.35             | 2.318 | 2.291      |
| L10/1Pr | 2.18             | 2.136 | 2.124      | 2.35             | 2.353 | 2.355      | 2.18             | 2.122 | 2.107      | 2.35             | 2.341 | 2.335      |
| L11/1Et | 1.895            | 1.969 | 2.016      | 2.18             | 2.219 | 2.267      | 1.895            | 1.976 | 2.032      | 2.18             | 2.225 | 2.275      |
| L11/1Pr | 2.045            | 2.028 | 1.990      | 2.29             | 2.252 | 2.204      | 2.045            | 2.025 | 1.983      | 2.29             | 2.247 | 2.196      |
| L12/1Et | 1.96             | 2.007 | 2.043      | 2.29             | 2.304 | 2.321      | 1.96             | 2.024 | 2.053      | 2.29             | 2.310 | 2.332      |
| L12/1Pr | 2.095            | 2.066 | 2.052      | 2.35             | 2.337 | 2.317      | 2.095            | 2.072 | 2.059      | 2.35             | 2.332 | 2.311      |
| L13/1Et | 2.845            | 3.023 |            | 2.95             | 2.813 |            | 2.845            | 2.938 | 2.971      | 2.95             | 2.941 | 2.936      |
| L13/1Pr | 3                | 3.082 |            | 3                | 2.846 |            | 3                | 2.987 | 2.985      | 3                | 2.964 | 2.940      |
| L14/1Et | 3                | 3.033 |            | 3                | 2.927 |            | 3                | 2.966 | 2.956      | 3                | 2.987 | 2.973      |
| L14/1Pr | 3                | 3.093 |            | 3                | 2.960 |            | 3                | 3.015 | 3.023      | 3                | 3.009 | 3.022      |
| L15/1Et | 3                | 3.023 |            | 3                | 2.813 |            | 3                | 2.950 | 2.931      | 3                | 2.976 | 2.937      |
| L15/1Pr | 3                | 3.082 |            | 3                | 2.846 |            | 3                | 2.998 | 3.006      | 3                | 2.998 | 3.005      |
| L16/1Et | 3                | 3.033 |            | 3                | 2.927 |            | 3                | 2.978 | 2.962      | 3                | 3.004 | 3.009      |
| L16/1Pr | 3                | 3.093 |            | 3                | 2.960 |            | 3                | 3.015 | 3.032      | 3                | 3.026 | 3.047      |
| L17/1Et | 3                |       |            | 3                |       |            | 3                | 2.950 |            | 3                | 2.891 |            |
| L17/1Pr | 2.5              |       |            | 3                |       |            | 3                | 2.998 |            | 3                | 2.913 |            |
| L18/1Et | 3                |       |            | 3                |       |            | 3                | 2.966 |            | 3                | 2.905 |            |
| L18/1Pr | 3                |       |            | 3                |       |            | 3                | 3.015 |            | 3                | 2.927 |            |

### Details of the support of the molecular design through the MFA using enantioselectivity data

We designed the molecules based on the MFA of b/l ratio and dr data as shown in Fig. 2 and figs S4-fig S6. In figs S27-S29, we show the structural information visualized by the MFA of the enantioselectivity data along with the template and designed molecules shown in figs S4-S6. Compared to the template molecules, the intermediate structures from the designed ligands did not overlap with the further structural information that lowered the enantioselectivity or if the structure overlapped with the structural information corresponding to negative regression coefficients, the decrease of the enantioselectivity was canceled by overlapping with the important structural information corresponding to positive regression coefficients. As shown in Table S12, predicted  $\Delta\Delta G^\ddagger$  values of the designed molecules were higher than those of the template molecules. All the MFAs in this section were performed using LASSO.

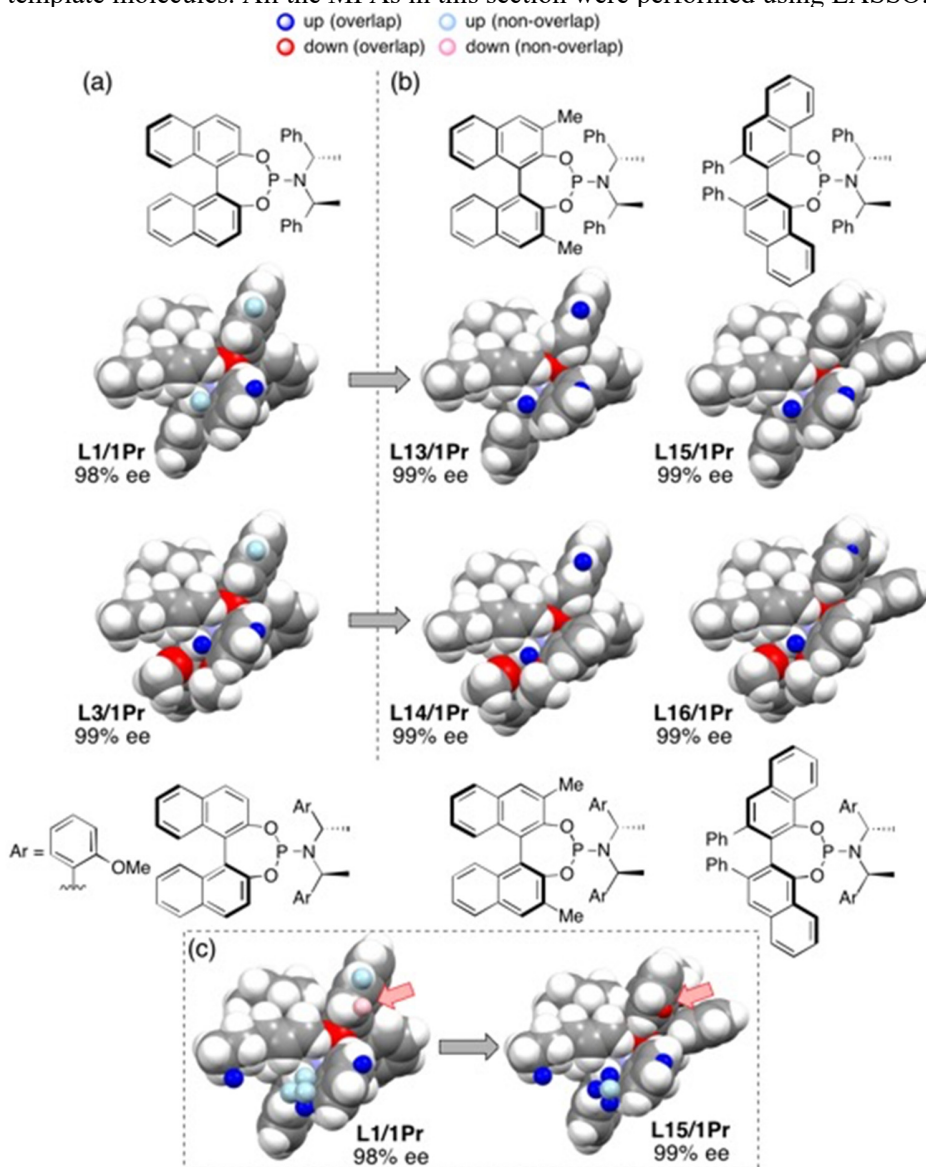

**Fig. S27.** Results of the MFA using enantioselectivity data obtained from the 24 reactions with valine ligand **S**. (a) Design templates. (b) Designed molecules. The structural information from coefficients with absolute values of  $< 0.075$  was not visualized. In fig. S27c, we also show the structural information from coefficient with absolute values of  $< 0.01$ . While a red point was identified as indicated by red arrows, the

decrease of the enantioselectivity was canceled by overlapping with the important structural information corresponding to positive regression coefficients as shown in figs. S27a and S27b. Thus, we employed the threshold value of 0.075 for the sake of clarity.

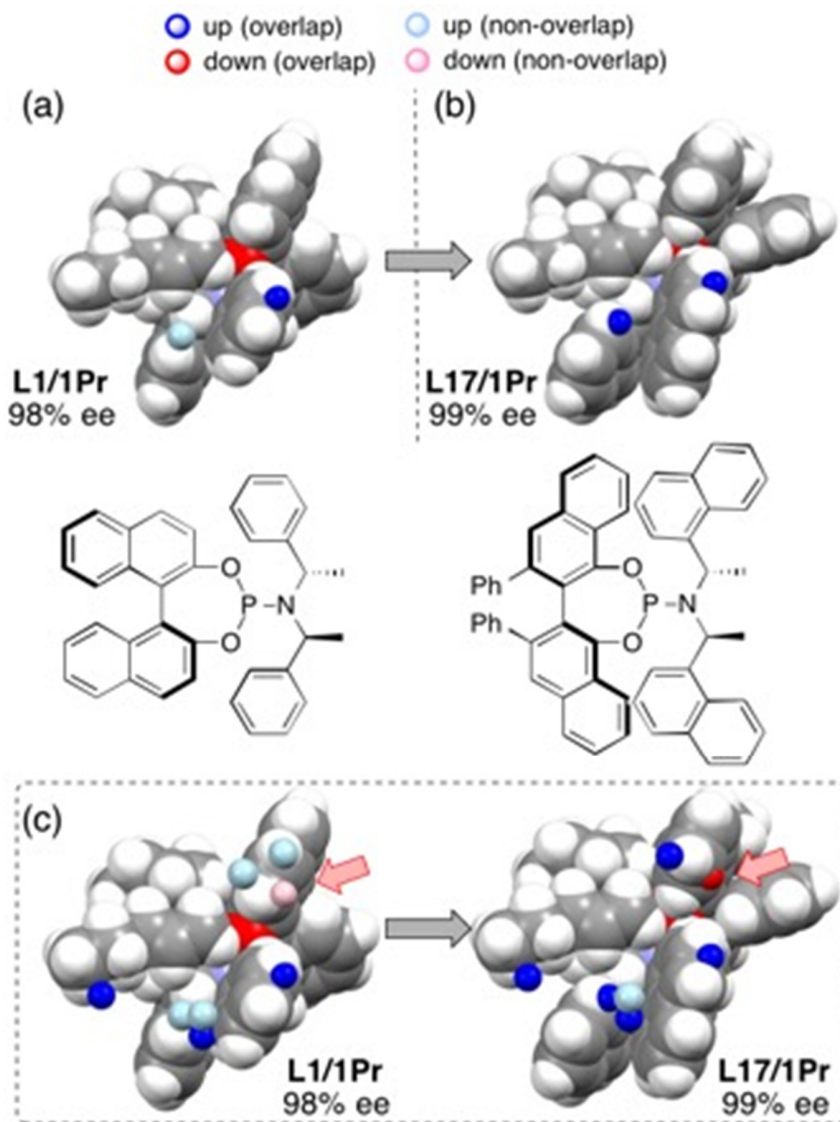

**Fig. S28.** Results of the MFA using enantioselectivity data obtained from the 32 reactions with valine ligand **S**. (a) Design templates. (b) Designed molecules. The structural information from coefficients with absolute values of  $<0.055$  was not visualized. In fig. S28c, we also show the structural information from coefficient with absolute values of  $<0.01$ . While a red point was identified as indicated by red arrows, the decrease of the enantioselectivity was canceled by overlapping with the important structural information corresponding to positive regression coefficients as shown in figs. S28a and S28b. Thus, we employed the threshold value of 0.055 for the sake of clarity.



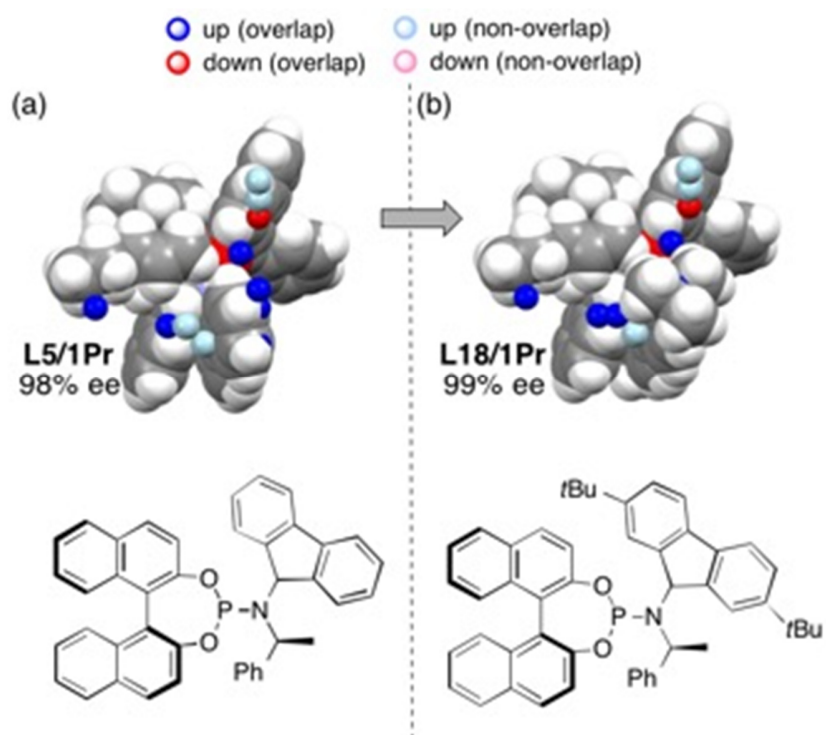

**Fig. S29.** Results of the MFA using b/l and dr data obtained from the 32 reactions with valine ligand **R**. (a) Design templates. (b) Designed molecules. The structural information from coefficients with absolute values of <0.01 was not visualized.

**MFA using dr data of (2*R*, 3*R*)-2/(2*S*, 3*R*)-2**

Since the enantioselectivity of this reaction system is excellent, we employed dr data measured by NMR. We also checked the quality of the regression models generated through analysis of dr obtained from NMR and enantiomeric ratios (more accurate dr of (2*R*, 3*R*)-2/(2*S*, 3*R*)-2) as shown on page S145-S159. (S148~ MFA using descriptor 1, S151~ MFA using descriptor 2, S154~ MFA using test set, and S157~ MFA in another design pathway.). The results are almost identical with those obtained through analysis of dr data measured by NMR.

**Table S13.** Enantioselectivity data of the minor diastereomers in the reactions using valine derived ligand **S** (Reaction conditions and enantioselectivity data of the major diastereomers are shown in Table S1.).  
N.D. = not determined due to small peak size (calculated as a single enantiomer).

|                                                                                                                                                                                                                                               |                                                                                                                                                                                                                                                 |                                                                                                                                                                                                                                                    |
|-----------------------------------------------------------------------------------------------------------------------------------------------------------------------------------------------------------------------------------------------|-------------------------------------------------------------------------------------------------------------------------------------------------------------------------------------------------------------------------------------------------|----------------------------------------------------------------------------------------------------------------------------------------------------------------------------------------------------------------------------------------------------|
| <p> <math>\text{R} = \text{Et}</math><br/> <math>\text{R} = \text{Pr}</math> </p>                                                                                                                                                             |                                                                                                                                                                                                                                                 |                                                                                                                                                                                                                                                    |
| <br><b>L1</b><br><b>2Et 1st.</b> 1.7/1 b/l, 1.9/1 dr, 77% yield, 80% ee<br><b>2nd.</b> 1.7/1 b/l, 1.9/1 dr, 70% yield, 82% ee<br><b>2Pr 1st.</b> 1.2/1 b/l, 2.8/1 dr, 87% yield, 80% ee<br><b>2nd.</b> 1.2/1 b/l, 2.8/1 dr, 77% yield, 81% ee | <br><b>L7</b><br><b>2Et 1st.</b> 1.1/1 b/l, 1.1/1 dr, 84% yield, 77% ee<br><b>2nd.</b> 1.1/1 b/l, 1.0/1 dr, 83% yield, 75% ee<br><b>2Pr 1st.</b> 1/1.2 b/l, 1.4/1 dr, 83% yield, 67% ee<br><b>2nd.</b> 1/1.2 b/l, 1.3/1 dr, 72% yield, 64% ee   | <br><b>L13</b><br><b>2Et 1st.</b> 2.8/1 b/l, 1.7/1 dr, 68% yield, 81% ee<br><b>2nd.</b> 3.3/1 b/l, 2.0/1 dr, 67% yield, 87% ee<br><b>2Pr 1st.</b> 4.0/1 b/l, 2.9/1 dr, 65% yield, 62% ee<br><b>2nd.</b> 4.6/1 b/l, 3.2/1 dr, 70% yield, 85% ee     |
| <br><b>L2</b><br><b>2Et 1st.</b> 1.9/1 b/l, 2.3/1 dr, 73% yield, 80% ee<br><b>2nd.</b> 1.8/1 b/l, 2.3/1 dr, 57% yield, 83% ee<br><b>2Pr 1st.</b> 1.3/1 b/l, 3.2/1 dr, 81% yield, 76% ee<br><b>2nd.</b> 1.4/1 b/l, 3.3/1 dr, 65% yield, 76% ee | <br><b>L8</b><br><b>2Et 1st.</b> 1.2/1 b/l, 1.4/1 dr, 78% yield, 77% ee<br><b>2nd.</b> 1.3/1 b/l, 1.5/1 dr, 90% yield, 75% ee<br><b>2Pr 1st.</b> 1/1.3 b/l, 1.8/1 dr, 91% yield, 67% ee<br><b>2nd.</b> 1/1.2 b/l, 1.7/1 dr, 70% yield, 62% ee   | <br><b>L14</b><br><b>2Et 1st.</b> 5.8/1 b/l, 2.9/1 dr, 56% yield, 91% ee<br><b>2nd.</b> 5.9/1 b/l, 3.1/1 dr, 65% yield, 99% ee<br><b>2Pr 1st.</b> 11/1 b/l, 6.5/1 dr, 65% yield, 85% ee<br><b>2nd.</b> 12/1 b/l, 6.5/1 dr, 64% yield, N.D.         |
| <br><b>L3</b><br><b>2Et 1st.</b> 5.0/1 b/l, 4.5/1 dr, 50% yield, 80% ee<br><b>2nd.</b> 5.0/1 b/l, 4.9/1 dr, 66% yield, 81% ee<br><b>2Pr 1st.</b> 3.8/1 b/l, 7.3/1 dr, 54% yield, 65% ee<br><b>2nd.</b> 4.0/1 b/l, 7.6/1 dr, 69% yield, 64% ee | <br><b>L9</b><br><b>2Et 1st.</b> 1.1/1 b/l, 1/1.1 dr, 83% yield, 82% ee<br><b>2nd.</b> 1.2/1 b/l, 1/1.1 dr, 73% yield, 81% ee<br><b>2Pr 1st.</b> 1/1.2 b/l, 1.2/1 dr, 95% yield, 71% ee<br><b>2nd.</b> 1/1.2 b/l, 1.2/1 dr, 81% yield, 70% ee   | <br><b>L15</b><br><b>2Et 1st.</b> 22.4/1 b/l, 3.9/1 dr, 44% yield, 93% ee<br><b>2nd.</b> 11.4/1 b/l, 3.1/1 dr, 60% yield, 95% ee<br><b>2Pr 1st.</b> 15.2/1 b/l, 4.3/1 dr, 73% yield, 94% ee<br><b>2nd.</b> 20.2/1 b/l, 4.4/1 dr, 60% yield, 95% ee |
| <br><b>L4</b><br><b>2Et 1st.</b> 4.0/1 b/l, 4.6/1 dr, 57% yield, 75% ee<br><b>2nd.</b> 4.7/1 b/l, 4.6/1 dr, 59% yield, 78% ee<br><b>2Pr 1st.</b> 3.2/1 b/l, 8.6/1 dr, 47% yield, 61% ee<br><b>2nd.</b> 3.5/1 b/l, 8.3/1 dr, 46% yield, 59% ee | <br><b>L10</b><br><b>2Et 1st.</b> 1.3/1 b/l, 1.1/1 dr, 88% yield, 80% ee<br><b>2nd.</b> 1.2/1 b/l, 1.1/1 dr, 78% yield, 81% ee<br><b>2Pr 1st.</b> 1/1.3 b/l, 1.5/1 dr, 93% yield, 71% ee<br><b>2nd.</b> 1/1.1 b/l, 1.6/1 dr, 83% yield, 70% ee  | <br><b>L16</b><br><b>2Et 1st.</b> >50/1 b/l, 4.5/1 dr, 56% yield, 92% ee<br><b>2nd.</b> >50/1 b/l, 5.4/1 dr, 52% yield, 99% ee<br><b>2Pr 1st.</b> >50/1 b/l, 9.4/1 dr, 51% yield, 92% ee<br><b>2nd.</b> >50/1 b/l, 10.1/1 dr, 68% yield, 93% ee    |
| <br><b>L5</b><br><b>2Et 1st.</b> 4.4/1 b/l, 1.1/1 dr, 68% yield, 87% ee<br><b>2nd.</b> 4.6/1 b/l, 1.1/1 dr, 75% yield, 88% ee<br><b>2Pr 1st.</b> 3.7/1 b/l, 1.7/1 dr, 66% yield, 84% ee<br><b>2nd.</b> 4.0/1 b/l, 1.8/1 dr, 63% yield, 86% ee | <br><b>L11</b><br><b>2Et 1st.</b> 1.2/1 b/l, 1/1.1 dr, 100% yield, 91% ee<br><b>2nd.</b> 1.2/1 b/l, 1/1.1 dr, 91% yield, 89% ee<br><b>2Pr 1st.</b> 1/1.2 b/l, 1.2/1 dr, 96% yield, 93% ee<br><b>2nd.</b> 1/1.2 b/l, 1.2/1 dr, 84% yield, 91% ee | <br><b>L17</b><br><b>2Et</b> 17/1 b/l, 12.5/1 dr, 72% yield, N.D.<br><b>2Pr</b> >50/1 b/l, 56.4/1 dr, 84% yield, N.D.                                                                                                                              |
| <br><b>L6</b><br><b>2Et 1st.</b> 3.9/1 b/l, 1.0/1 dr, 72% yield, 88% ee<br><b>2nd.</b> 3.6/1 b/l, 1.1/1 dr, 83% yield, 90% ee<br><b>2Pr 1st.</b> 3.4/1 b/l, 1.7/1 dr, 87% yield, 86% ee<br><b>2nd.</b> 3.5/1 b/l, 1.6/1 dr, 82% yield, 81% ee | <br><b>L12</b><br><b>2Et 1st.</b> 1.2/1 b/l, 1.1/1 dr, 84% yield, 82% ee<br><b>2nd.</b> 1.2/1 b/l, 1.2/1 dr, 80% yield, 82% ee<br><b>2Pr 1st.</b> 1/1.3 b/l, 1.5/1 dr, 85% yield, 74% ee<br><b>2nd.</b> 1/1.2 b/l, 1.6/1 dr, 85% yield, 75% ee  | <br><b>L18</b><br><b>2Et</b> >50/1 b/l, 2.8/1 dr, 55% yield, N.D.<br><b>2Pr</b> >50/1 b/l, 6.3/1 dr, 57% yield, N.D.                                                                                                                               |



**Table S14.** Enantioselectivity data of the minor diastereomers in the reactions using valine derived ligand **R** (Reaction conditions and enantioselectivity data of the major diastereomers are shown in Table S2.). N.D. = not determined due to small peak size (calculated as a single enantiomer).

|                                                               |                                                                                                                                                                                                                                           |                   |                                                                                                                                                                                                                                           |                   |                                                                                                                                                                                                                                                     |
|---------------------------------------------------------------|-------------------------------------------------------------------------------------------------------------------------------------------------------------------------------------------------------------------------------------------|-------------------|-------------------------------------------------------------------------------------------------------------------------------------------------------------------------------------------------------------------------------------------|-------------------|-----------------------------------------------------------------------------------------------------------------------------------------------------------------------------------------------------------------------------------------------------|
| <p> <b>1Et</b> (R = Et)<br/> <b>1Pr</b> (R = Pr)         </p> |                                                                                                                                                                                                                                           |                   | <p><b>R</b></p>                                                                                                                                                                                                                           |                   |                                                                                                                                                                                                                                                     |
| <p><b>L1</b></p>                                              | <p><b>2Et 1st.</b> 2.0/1 b/l, 5.2/1 dr, 94% yield, 88% ee<br/> <b>2nd.</b> 2.1/1 b/l, 6.5/1 dr, 85% yield, 94% ee<br/> <b>2Pr 1st.</b> 2.4/1 b/l, 9.6/1 dr, 100% yield, 99% ee<br/> <b>2nd.</b> 2.7/1 b/l, 10.0/1 dr, 77% yield, N.D.</p> | <p><b>L7</b></p>  | <p><b>2Et 1st.</b> 1/1.5 b/l, 3.2/1 dr, 87% yield, 41% ee<br/> <b>2nd.</b> 1/1.6 b/l, 3.5/1 dr, 68% yield, 70% ee<br/> <b>2Pr 1st.</b> 1/1.5 b/l, 4.6/1 dr, 82% yield, 46% ee<br/> <b>2nd.</b> 1/1.4 b/l, 5.1/1 dr, 66% yield, N.D.</p>   | <p><b>L13</b></p> | <p><b>2Et 1st.</b> 4.1/1 b/l, 9.9/1 dr, 89% yield, 99% ee<br/> <b>2nd.</b> 4.7/1 b/l, 8.5/1 dr, 80% yield, 99% ee<br/> <b>2Pr 1st.</b> 9.9/1 b/l, 10.0/1 dr, 81% yield, N.D.<br/> <b>2nd.</b> 7.5/1 b/l, 9.8/1 dr, 64% yield, N.D.</p>              |
| <p><b>L2</b></p>                                              | <p><b>2Et 1st.</b> 2.4/1 b/l, 6.1/1 dr, 97% yield, 99% ee<br/> <b>2nd.</b> 2.5/1 b/l, 7.4/1 dr, 76% yield, 98% ee<br/> <b>2Pr 1st.</b> 2.6/1 b/l, 11.3/1 dr, 100% yield, N.D.<br/> <b>2nd.</b> 2.7/1 b/l, 14.1/1 dr, 94% yield, N.D.</p>  | <p><b>L8</b></p>  | <p><b>2Et 1st.</b> 1.0/1 b/l, 3.6/1 dr, 87% yield, 49% ee<br/> <b>2nd.</b> 1.1/1 b/l, 2.5/1 dr, 98% yield, 49% ee<br/> <b>2Pr 1st.</b> 1/1.1 b/l, 6.2/1 dr, 98% yield, 45% ee<br/> <b>2nd.</b> 1/1.0 b/l, 7.5/1 dr, 86% yield, N.D.</p>   | <p><b>L14</b></p> | <p><b>2Et 1st.</b> 11.0/1 b/l, 13.1/1 dr, 77% yield, 99% ee<br/> <b>2nd.</b> 10.7/1 b/l, 10.6/1 dr, 93% yield, 94% ee<br/> <b>2Pr 1st.</b> &gt;50/1 b/l, 15.2/1 dr, 80% yield, N.D.<br/> <b>2nd.</b> &gt;50/1 b/l, 14.9/1 dr, 88% yield, 93% ee</p> |
| <p><b>L3</b></p>                                              | <p><b>2Et 1st.</b> 4.6/1 b/l, 6.7/1 dr, 70% yield, 99% ee<br/> <b>2nd.</b> 5.3/1 b/l, 6.0/1 dr, 74% yield, 98% ee<br/> <b>2Pr 1st.</b> 4.5/1 b/l, 10.4/1 dr, 65% yield, N.D.<br/> <b>2nd.</b> 4.8/1 b/l, 9.8/1 dr, 85% yield, N.D.</p>    | <p><b>L9</b></p>  | <p><b>2Et 1st.</b> 1/1.5 b/l, 2.7/1 dr, 83% yield, 48% ee<br/> <b>2nd.</b> 1/1.6 b/l, 4.0/1 dr, 84% yield, 45% ee<br/> <b>2Pr 1st.</b> 1/1.5 b/l, 4.6/1 dr, 95% yield, 54% ee<br/> <b>2nd.</b> 1/1.5 b/l, 5.9/1 dr, 85% yield, 40% ee</p> | <p><b>L15</b></p> | <p><b>2Et 1st.</b> 19.8/1 b/l, 3.0/1 dr, 85% yield, 99% ee<br/> <b>2nd.</b> 22.8/1 b/l, 3.1/1 dr, 73% yield, 99% ee<br/> <b>2Pr 1st.</b> 38.5/1 b/l, 3.9/1 dr, 87% yield, N.D.<br/> <b>2nd.</b> 35.2/1 b/l, 4.0/1 dr, 84% yield, N.D.</p>           |
| <p><b>L4</b></p>                                              | <p><b>2Et 1st.</b> 4.8/1 b/l, 6.5/1 dr, 81% yield, 99% ee<br/> <b>2nd.</b> 5.4/1 b/l, 6.8/1 dr, 72% yield, 99% ee<br/> <b>2Pr 1st.</b> 4.0/1 b/l, 10.3/1 dr, 56% yield, N.D.<br/> <b>2nd.</b> 5.3/1 b/l, 10.5/1 dr, 84% yield, N.D.</p>   | <p><b>L10</b></p> | <p><b>2Et 1st.</b> 1/1.1 b/l, 3.8/1 dr, 88% yield, 43% ee<br/> <b>2nd.</b> 1/1.1 b/l, 5.2/1 dr, 80% yield, 46% ee<br/> <b>2Pr 1st.</b> 1/1.2 b/l, 6.7/1 dr, 100% yield, 35% ee<br/> <b>2nd.</b> 1/1.0 b/l, 6.4/1 dr, 86% yield, N.D.</p>  | <p><b>L16</b></p> | <p><b>2Et 1st.</b> &gt;50/1 b/l, 8.2/1 dr, 69% yield, 99% ee<br/> <b>2nd.</b> &gt;50/1 b/l, 8.8/1 dr, 76% yield, 99% ee<br/> <b>2Pr 1st.</b> &gt;50/1 b/l, 10.9/1 dr, 71% yield, N.D.<br/> <b>2nd.</b> &gt;50/1 b/l, 11.6/1 dr, 80% yield, N.D.</p> |
| <p><b>L5</b></p>                                              | <p><b>2Et 1st.</b> 4.0/1 b/l, 11.0/1 dr, 83% yield, 99% ee<br/> <b>2nd.</b> 4.2/1 b/l, 10.8/1 dr, 83% yield, N.D.<br/> <b>2Pr 1st.</b> 4.2/1 b/l, 16.7/1 dr, 95% yield, 99% ee<br/> <b>2nd.</b> 4.5/1 b/l, 15.9/1 dr, 85% yield, N.D.</p> | <p><b>L11</b></p> | <p><b>2Et 1st.</b> 1/1.4 b/l, 2.7/1 dr, 86% yield, 52% ee<br/> <b>2nd.</b> 1/1.6 b/l, 4.9/1 dr, 87% yield, 50% ee<br/> <b>2Pr 1st.</b> 1/1.6 b/l, 5.4/1 dr, 85% yield, 72% ee<br/> <b>2nd.</b> 1/1.5 b/l, 6.2/1 dr, 84% yield, N.D.</p>   | <p><b>L17</b></p> | <p><b>2Et</b> &gt;50/1 b/l, 1.5/1 dr, 77% yield, N.D.<br/> <b>2Pr</b> &gt;50/1 b/l, 1.9/1 dr, 85% yield, N.D.</p>                                                                                                                                   |
| <p><b>L6</b></p>                                              | <p><b>2Et 1st.</b> 3.9/1 b/l, 10.6/1 dr, 100% yield, 91% ee<br/> <b>2nd.</b> 3.4/1 b/l, 9.9/1 dr, 96% yield, 99% ee<br/> <b>2Pr 1st.</b> 3.8/1 b/l, 16.4/1 dr, 96% yield, N.D.<br/> <b>2nd.</b> 4.1/1 b/l, 17.7/1 dr, 98% yield, N.D.</p> | <p><b>L12</b></p> | <p><b>2Et 1st.</b> 1/1.1 b/l, 3.8/1 dr, 88% yield, 49% ee<br/> <b>2nd.</b> 1.0/1 b/l, 2.5/1 dr, 100% yield, 52% ee<br/> <b>2Pr 1st.</b> 1/1.2 b/l, 6.7/1 dr, 100% yield, 35% ee<br/> <b>2nd.</b> 1/1.2 b/l, 9.1/1 dr, 95% yield, N.D.</p> | <p><b>L18</b></p> | <p><b>2Et</b> &gt;50/1 b/l, 19.8/1 dr, 91% yield, N.D.<br/> <b>2Pr</b> &gt;50/1 b/l, 19.9/1 dr, 97% yield, N.D.</p>                                                                                                                                 |

**Table S15. Experimental and predicted values of dr data determined by NMR and enantioselectivity data. (MFA using descriptor1)**

Diastereoselectivity (dr) of products **2Et** and **2Pr** are shown as  $\Delta\Delta G^\ddagger$  values (kcal/mol), which were used as the target variables for the regression analysis (**Exp.**). Predicted values (**Pred.**) and predicted values from leave-one-out cross-validation [**Pred. (CV)**] are also shown. Ligands for the 1st MFA are highlighted by yellow. Ligands designed at the 1st MFA are highlighted by green. The 2nd MFA was performed including the designed ligands. **L17** and **L18** are the optimum ligand for the reactions using valine derived ligands **S** and **R**, respectively. Predicted and measured  $\Delta\Delta G^\ddagger$  values in the reactions using the template and designed molecules are highlighted by red.

|         | 24 reactions (S, dr) |        |            | 24 reactions (R, dr) |       |            | 32 reactions (S, dr) |        |            | 32 reactions (R, dr) |       |            |
|---------|----------------------|--------|------------|----------------------|-------|------------|----------------------|--------|------------|----------------------|-------|------------|
|         | Exp.                 | Pred.  | Pred. (CV) | Exp.                 | Pred. | Pred. (CV) | Exp.                 | Pred.  | Pred. (CV) | Exp.                 | Pred. | Pred. (CV) |
| L1/1Et  | 0.470                | 0.492  | 0.528      | 1.154                | 1.204 | 1.217      | 0.470                | 0.497  | 0.607      | 1.154                | 1.222 | 1.256      |
| L1/1Pr  | 0.721                | 0.695  | 0.662      | 1.461                | 1.476 | 1.481      | 0.721                | 0.720  | 0.721      | 1.461                | 1.469 | 1.476      |
| L2/1Et  | 0.594                | 0.611  | 0.636      | 1.221                | 1.248 | 1.304      | 0.594                | 0.592  | 0.591      | 1.221                | 1.262 | 1.306      |
| L2/1Pr  | 0.836                | 0.813  | 0.787      | 1.627                | 1.52  | 1.448      | 0.836                | 0.816  | 0.795      | 1.627                | 1.510 | 1.437      |
| L3/1Et  | 1.056                | 1.053  | 1.205      | 1.185                | 1.204 | 1.211      | 1.056                | 1.032  | 0.986      | 1.185                | 1.222 | 1.235      |
| L3/1Pr  | 1.412                | 1.408  | 1.487      | 1.480                | 1.476 | 1.476      | 1.412                | 1.445  | 1.476      | 1.480                | 1.469 | 1.466      |
| L4/1Et  | 1.057                | 1.054  | 1.291      | 1.215                | 1.204 | 1.201      | 1.057                | 1.072  | 1.257      | 1.215                | 1.222 | 1.223      |
| L4/1Pr  | 1.510                | 1.490  | 1.393      | 1.502                | 1.476 | 1.470      | 1.510                | 1.461  | 1.423      | 1.502                | 1.469 | 1.457      |
| L5/1Et  | 0.099                | 0.102  | 0.108      | 1.531                | 1.495 | 1.485      | 0.099                | 0.104  | 0.115      | 1.531                | 1.491 | 1.472      |
| L5/1Pr  | 0.406                | 0.402  | 0.395      | 1.786                | 1.767 | 1.765      | 0.406                | 0.394  | 0.375      | 1.786                | 1.745 | 1.725      |
| L6/1Et  | 0.064                | 0.074  | 0.078      | 1.504                | 1.495 | 1.496      | 0.064                | 0.087  | 0.096      | 1.504                | 1.491 | 1.486      |
| L6/1Pr  | 0.372                | 0.375  | 0.382      | 1.813                | 1.767 | 1.754      | 0.372                | 0.377  | 0.389      | 1.813                | 1.738 | 1.697      |
| L7/1Et  | 0.080                | 0.074  | 0.070      | 0.912                | 0.941 | 0.947      | 0.080                | 0.087  | 0.089      | 0.912                | 0.945 | 0.954      |
| L7/1Pr  | 0.295                | 0.412  | 0.471      | 1.084                | 1.213 | 1.261      | 0.295                | 0.413  | 0.47       | 1.084                | 1.193 | 1.233      |
| L8/1Et  | 0.294                | 0.210  | 0.164      | 0.887                | 0.941 | 0.957      | 0.294                | 0.189  | 0.134      | 0.887                | 0.945 | 0.964      |
| L8/1Pr  | 0.464                | 0.412  | 0.388      | 1.314                | 1.213 | 1.166      | 0.464                | 0.413  | 0.389      | 1.314                | 1.193 | 1.141      |
| L9/1Et  | -0.018               | 0.000  | 0.008      | 0.960                | 1.01  | 1.030      | -0.018               | 0.010  | 0.023      | 0.960                | 1.028 | 1.053      |
| L9/1Pr  | 0.203                | 0.202  | 0.199      | 1.246                | 1.282 | 1.297      | 0.203                | 0.233  | 0.258      | 1.246                | 1.275 | 1.287      |
| L10/1Et | 0.096                | 0.136  | 0.171      | 1.136                | 1.01  | 0.968      | 0.096                | 0.112  | 0.124      | 1.136                | 1.028 | 0.989      |
| L10/1Pr | 0.363                | 0.338  | 0.321      | 1.290                | 1.282 | 1.279      | 0.363                | 0.335  | 0.317      | 1.290                | 1.275 | 1.270      |
| L11/1Et | -0.039               | -0.018 | 0.001      | 1.016                | 0.991 | 0.935      | -0.039               | -0.023 | -0.015     | 1.016                | 0.992 | 0.946      |
| L11/1Pr | 0.182                | 0.185  | 0.181      | 1.157                | 1.263 | 1.307      | 0.182                | 0.201  | 0.214      | 1.157                | 1.239 | 1.289      |
| L12/1Et | 0.121                | 0.131  | 0.145      | 0.908                | 1.032 | 1.176      | 0.121                | 0.120  | 0.114      | 0.908                | 1.045 | 1.200      |
| L12/1Pr | 0.344                | 0.333  | 0.272      | 1.425                | 1.303 | 1.246      | 0.344                | 0.338  | 0.308      | 1.425                | 1.292 | 1.208      |
| L13/1Et | 0.442                | 0.314  |            | 1.422                | 1.495 |            | 0.442                | 0.513  | 0.591      | 1.422                | 1.328 | 1.257      |
| L13/1Pr | 0.804                | 0.516  |            | 1.469                | 1.767 |            | 0.804                | 0.737  | 0.661      | 1.469                | 1.576 | 1.693      |
| L14/1Et | 0.718                | 0.874  |            | 1.596                | 1.539 |            | 0.718                | 0.743  | 0.808      | 1.596                | 1.554 | 1.474      |
| L14/1Pr | 1.223                | 1.229  |            | 1.749                | 1.811 |            | 1.223                | 1.198  | 1.149      | 1.749                | 1.753 | 1.804      |
| L15/1Et | 0.821                | 0.356  |            | 0.716                | 1.495 |            | 0.821                | 0.784  | 0.728      | 0.716                | 0.732 | 0.692      |
| L15/1Pr | 0.959                | 0.558  |            | 0.879                | 1.767 |            | 0.959                | 0.967  | 1.003      | 0.879                | 0.920 | 1.057      |
| L16/1Et | 1.038                | 0.916  |            | 1.374                | 1.539 |            | 1.038                | 1.045  | 1.066      | 1.374                | 1.349 | 1.205      |
| L16/1Pr | 1.484                | 1.271  |            | 1.551                | 1.811 |            | 1.484                | 1.458  | 1.408      | 1.551                | 1.597 | 1.635      |
| L17/1Et | 1.619                |        |            | 0.257                |       |            | 1.619                | 0.784  |            | 0.257                | 0.689 |            |
| L17/1Pr | 2.586                |        |            | 0.409                |       |            | 2.586                | 1.008  |            | 0.409                | 0.937 |            |
| L18/1Et | 0.658                |        |            | 1.914                |       |            | 0.658                | 0.338  |            | 1.914                | 1.538 |            |
| L18/1Pr | 1.179                |        |            | 1.917                |       |            | 1.179                | 0.561  |            | 1.917                | 1.785 |            |

# Plots of the measured vs predicted values

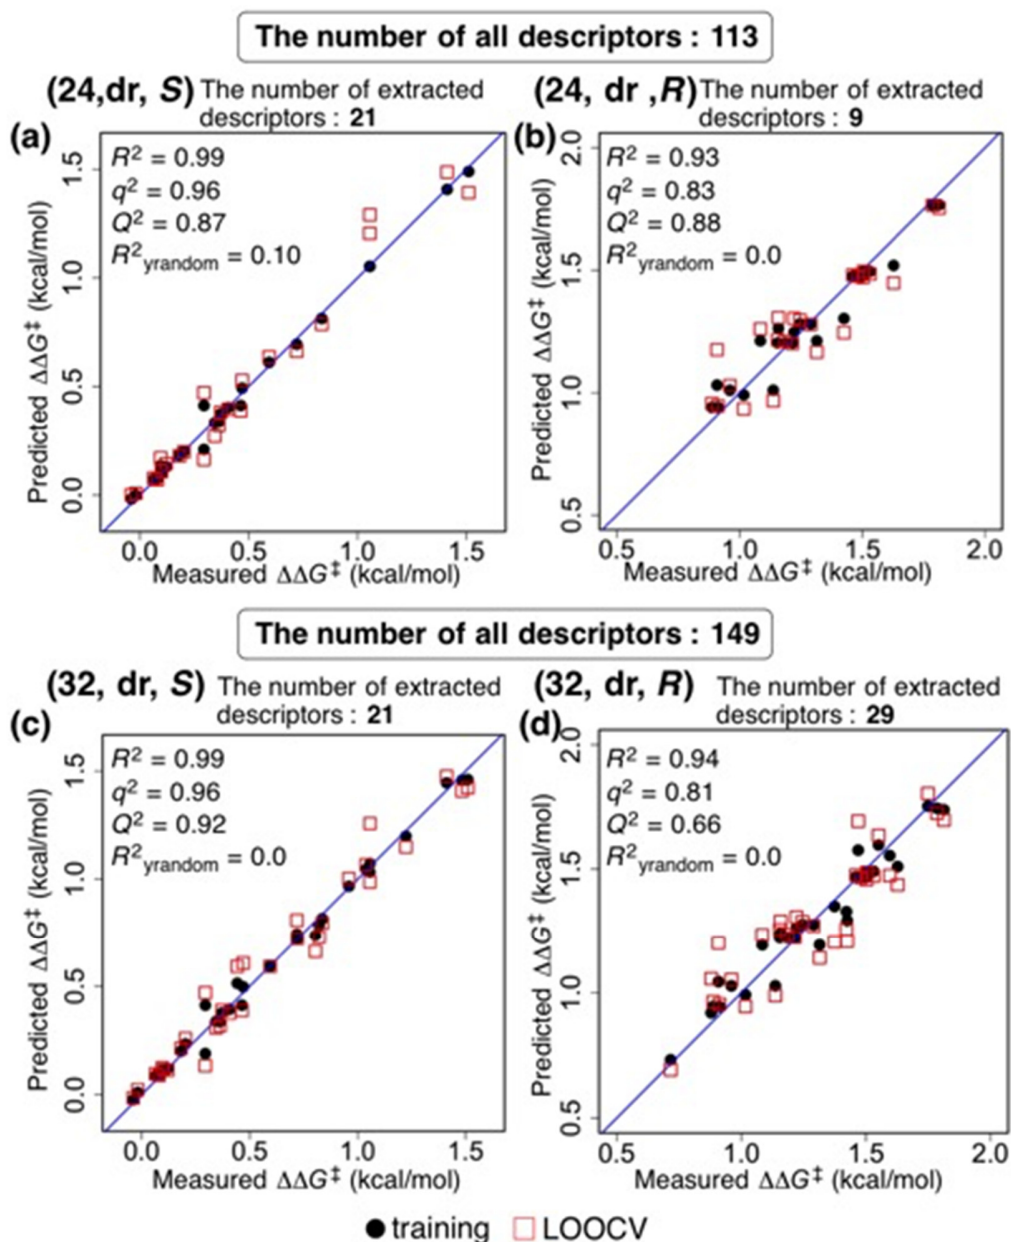

**Fig. S30.** Results of the MFA using descriptor1 and dr data determined by NMR and enantioselectivity data. (a)–(d) Plots of the predicted (black dots) and the leave-one-out predicted (red squares) vs. measured  $\Delta\Delta G^\ddagger$  values.  $R^2$  : Coefficient of determination  $q^2$  : Leave-one-out cross-validated coefficient of determination.  $Q^2$  : 4-fold cross-validated coefficient of determination.  $R^2_{\text{yrandom}}$  : Coefficient of determination calculated by y-randomization. The blue line is the x=y line.

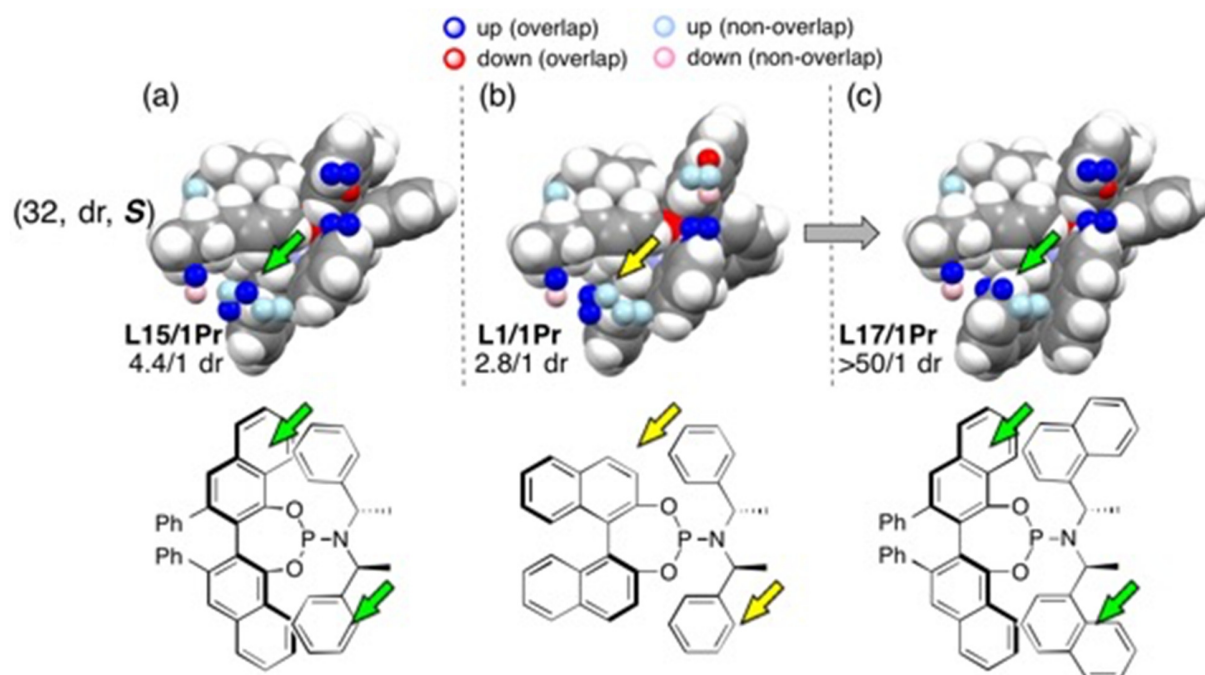

**Fig. S31.** Results of the MFA using dr data obtained from the 32 reactions with valine ligand **S**. (a) The origin of the blue point used for the molecular design. (b) Design templates. (c) Designed molecules. Diastereomeric ratios determined by NMR are shown.

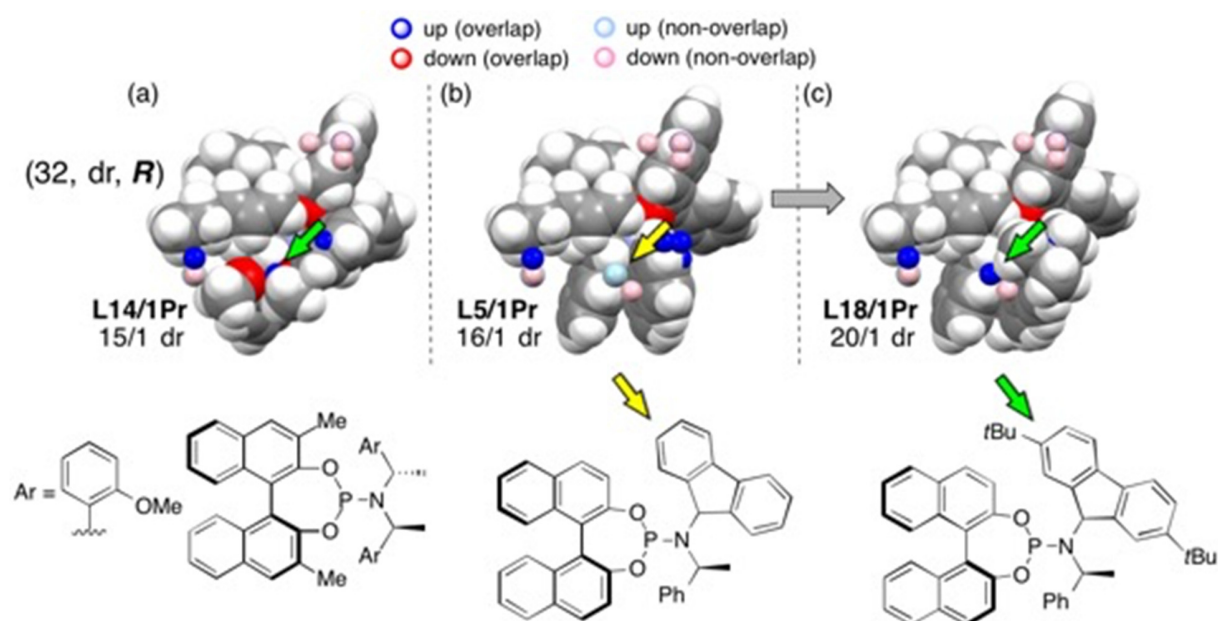

**Fig. S32.** Results of the MFA using dr data obtained from the 32 reactions with valine ligand **R**. (a) The origin of the blue point used for the molecular design. (b) Design templates. (c) Designed molecules. Diastereomeric ratios determined by NMR are shown.

**Table S16. Experimental and predicted values of dr data determined by NMR and enantioselectivity data. (MFA using descriptor2)**

Diastereoselectivity (dr) of products **2Et** and **2Pr** are shown as  $\Delta\Delta G^\ddagger$  values (kcal/mol), which were used as the target variables for the regression analysis (**Exp.**). Predicted values (**Pred.**) and predicted values from leave-one-out cross-validation [**Pred. (CV)**] are also shown. Ligands for the 1st MFA are highlighted by yellow. Ligands designed at the 1st MFA are highlighted by green. The 2nd MFA was performed including the designed ligands. **L17** and **L18** are the optimum ligand for the reactions using valine derived ligands **S** and **R**, respectively. Predicted and measured  $\Delta\Delta G^\ddagger$  values in the reactions using the template and designed molecules are highlighted by red.

|         | 24 reactions ( <i>S</i> , dr) |        |            | 24 reactions ( <i>R</i> , dr) |       |            | 32 reactions ( <i>S</i> , dr) |       |            | 32 reactions ( <i>R</i> , dr) |       |            |
|---------|-------------------------------|--------|------------|-------------------------------|-------|------------|-------------------------------|-------|------------|-------------------------------|-------|------------|
|         | Exp.                          | Pred.  | Pred. (CV) | Exp.                          | Pred. | Pred. (CV) | Exp.                          | Pred. | Pred. (CV) | Exp.                          | Pred. | Pred. (CV) |
| L1/1Et  | 0.470                         | 0.494  | 0.530      | 1.154                         | 1.212 | 1.223      | 0.470                         | 0.494 | 0.601      | 1.154                         | 1.235 | 1.253      |
| L1/1Pr  | 0.721                         | 0.693  | 0.661      | 1.461                         | 1.495 | 1.502      | 0.721                         | 0.728 | 0.734      | 1.461                         | 1.472 | 1.474      |
| L2/1Et  | 0.594                         | 0.613  | 0.641      | 1.221                         | 1.212 | 1.210      | 0.594                         | 0.588 | 0.583      | 1.221                         | 1.245 | 1.268      |
| L2/1Pr  | 0.836                         | 0.812  | 0.783      | 1.627                         | 1.495 | 1.457      | 0.836                         | 0.822 | 0.808      | 1.627                         | 1.482 | 1.429      |
| L3/1Et  | 1.056                         | 1.053  | 1.208      | 1.185                         | 1.212 | 1.217      | 1.056                         | 1.020 | 0.968      | 1.185                         | 1.235 | 1.245      |
| L3/1Pr  | 1.412                         | 1.407  | 1.492      | 1.480                         | 1.495 | 1.498      | 1.412                         | 1.448 | 1.479      | 1.480                         | 1.472 | 1.469      |
| L4/1Et  | 1.057                         | 1.053  | 1.294      | 1.215                         | 1.212 | 1.211      | 1.057                         | 1.072 | 1.254      | 1.215                         | 1.235 | 1.238      |
| L4/1Pr  | 1.510                         | 1.491  | 1.393      | 1.502                         | 1.495 | 1.494      | 1.510                         | 1.467 | 1.432      | 1.502                         | 1.472 | 1.463      |
| L5/1Et  | 0.099                         | 0.099  | 0.100      | 1.531                         | 1.502 | 1.493      | 0.099                         | 0.099 | 0.099      | 1.531                         | 1.450 | 1.367      |
| L5/1Pr  | 0.406                         | 0.404  | 0.400      | 1.786                         | 1.785 | 1.788      | 0.406                         | 0.394 | 0.377      | 1.786                         | 1.743 | 1.673      |
| L6/1Et  | 0.064                         | 0.067  | 0.076      | 1.504                         | 1.502 | 1.504      | 0.064                         | 0.078 | 0.097      | 1.504                         | 1.450 | 1.424      |
| L6/1Pr  | 0.372                         | 0.372  | 0.376      | 1.813                         | 1.785 | 1.777      | 0.372                         | 0.373 | 0.372      | 1.813                         | 1.687 | 1.600      |
| L7/1Et  | 0.080                         | 0.051  | 0.009      | 0.912                         | 0.923 | 0.924      | 0.080                         | 0.144 | 0.172      | 0.912                         | 0.951 | 0.963      |
| L7/1Pr  | 0.295                         | 0.405  | 0.460      | 1.084                         | 1.206 | 1.253      | 0.295                         | 0.378 | 0.415      | 1.084                         | 1.188 | 1.226      |
| L8/1Et  | 0.294                         | 0.206  | 0.154      | 0.887                         | 0.923 | 0.934      | 0.294                         | 0.144 | 0.080      | 0.887                         | 0.951 | 0.973      |
| L8/1Pr  | 0.464                         | 0.405  | 0.375      | 1.314                         | 1.206 | 1.158      | 0.464                         | 0.378 | 0.342      | 1.314                         | 1.188 | 1.135      |
| L9/1Et  | -0.018                        | -0.008 | -0.003     | 0.960                         | 0.996 | 1.005      | -0.018                        | 0.054 | 0.082      | 0.960                         | 1.021 | 1.035      |
| L9/1Pr  | 0.203                         | 0.190  | 0.177      | 1.246                         | 1.279 | 1.288      | 0.203                         | 0.288 | 0.322      | 1.246                         | 1.258 | 1.261      |
| L10/1Et | 0.096                         | 0.147  | 0.195      | 1.136                         | 0.996 | 0.958      | 0.096                         | 0.054 | 0.033      | 1.136                         | 1.021 | 0.991      |
| L10/1Pr | 0.363                         | 0.346  | 0.331      | 1.290                         | 1.279 | 1.276      | 0.363                         | 0.288 | 0.254      | 1.290                         | 1.258 | 1.250      |
| L11/1Et | -0.039                        | 0.010  | 0.060      | 1.016                         | 0.996 | 0.989      | -0.039                        | 0.008 | 0.061      | 1.016                         | 1.021 | 1.021      |
| L11/1Pr | 0.182                         | 0.209  | 0.241      | 1.157                         | 1.279 | 1.315      | 0.182                         | 0.242 | 0.312      | 1.157                         | 1.258 | 1.283      |
| L12/1Et | 0.121                         | 0.132  | 0.146      | 0.908                         | 1.025 | 1.164      | 0.121                         | 0.109 | 0.097      | 0.908                         | 1.051 | 1.211      |
| L12/1Pr | 0.344                         | 0.330  | 0.313      | 1.425                         | 1.308 | 1.255      | 0.344                         | 0.343 | 0.342      | 1.425                         | 1.287 | 1.235      |
| L13/1Et | 0.442                         | 0.294  |            | 1.422                         | 1.502 |            | 0.442                         | 0.506 | 0.560      | 1.422                         | 1.377 | 1.346      |
| L13/1Pr | 0.804                         | 0.493  |            | 1.469                         | 1.785 |            | 0.804                         | 0.740 | 0.684      | 1.469                         | 1.614 | 1.704      |
| L14/1Et | 0.718                         | 0.890  |            | 1.596                         | 1.502 |            | 0.718                         | 0.762 | 0.804      | 1.596                         | 1.524 | 1.460      |
| L14/1Pr | 1.223                         | 1.245  |            | 1.749                         | 1.785 |            | 1.223                         | 1.190 | 1.151      | 1.749                         | 1.761 | 1.794      |
| L15/1Et | 0.821                         | 0.294  |            | 0.716                         | 1.502 |            | 0.821                         | 0.783 | 0.721      | 0.716                         | 0.709 | 0.681      |
| L15/1Pr | 0.959                         | 0.493  |            | 0.879                         | 1.785 |            | 0.959                         | 0.973 | 1.031      | 0.879                         | 0.946 | 1.005      |
| L16/1Et | 1.038                         | 0.890  |            | 1.374                         | 1.502 |            | 1.038                         | 1.039 | 1.046      | 1.374                         | 1.386 | 1.363      |
| L16/1Pr | 1.484                         | 1.245  |            | 1.551                         | 1.785 |            | 1.484                         | 1.467 | 1.452      | 1.551                         | 1.624 | 1.725      |
| L17/1Et | 1.619                         |        |            | 0.257                         |       |            | 1.619                         | 0.713 |            | 0.257                         | 0.680 |            |
| L17/1Pr | 2.586                         |        |            | 0.409                         |       |            | 2.586                         | 0.947 |            | 0.409                         | 0.917 |            |
| L18/1Et | 0.658                         |        |            | 1.914                         |       |            | 0.658                         | 0.418 |            | 1.914                         | 1.443 |            |
| L18/1Pr | 1.179                         |        |            | 1.917                         |       |            | 1.179                         | 0.652 |            | 1.917                         | 1.680 |            |



# Plots of the measured vs predicted values

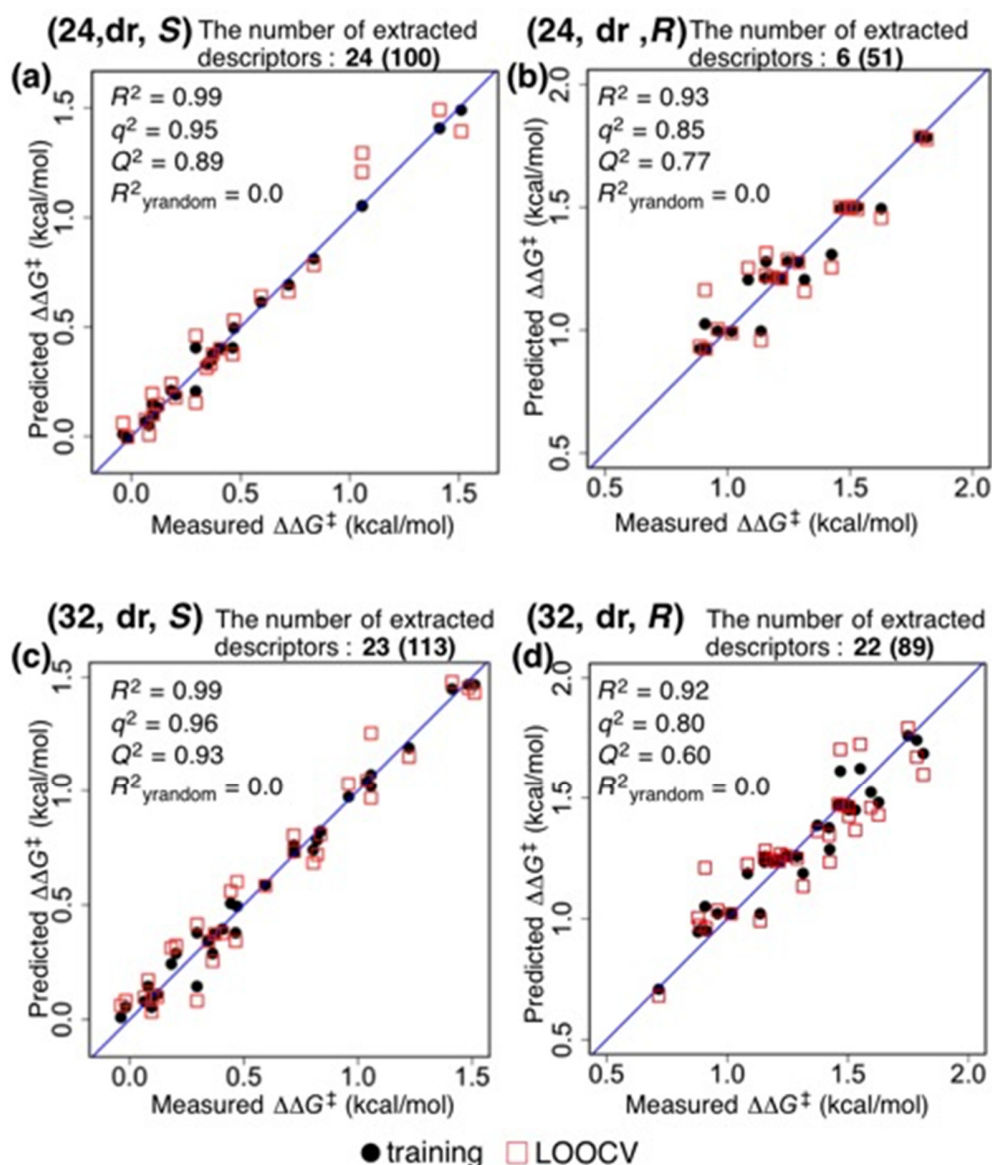

**Fig. S33.** Results of the MFA using descriptor 2 and dr data determined by NMR and enantioselectivity data. (a)–(d) Plots of the predicted (black dots) and the leave-one-out predicted (red squares) vs. measured  $\Delta\Delta G^\ddagger$  values. The number in parenthesis is the number of all descriptors.  $R^2$ : Coefficient of determination  $q^2$ : Leave-one-out cross-validated coefficient of determination.  $Q^2$ : 4-fold cross-validated coefficient of determination.  $R^2_{\text{yrandom}}$ : Coefficient of determination calculated by y-randomization. The blue line is the  $x=y$  line.

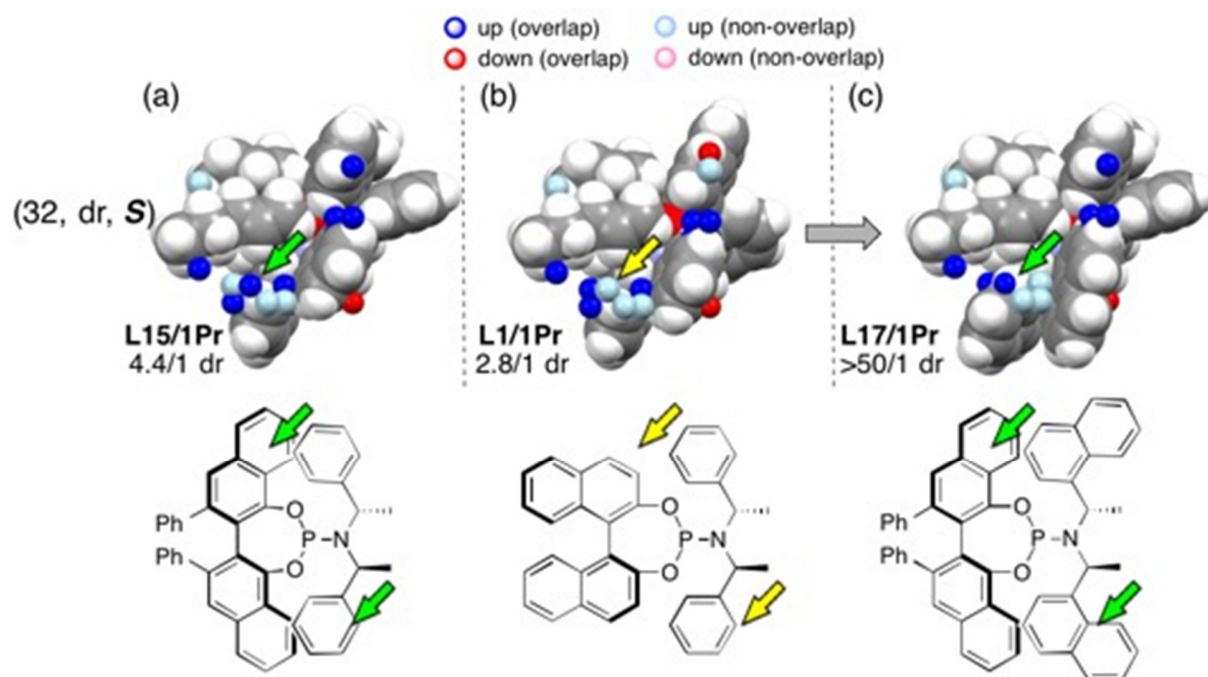

**Fig. S34.** Results of the MFA using dr data obtained from the 32 reactions with valine ligand **S**. (a) The origin of the blue point used for the molecular design. (b) Design templates. (c) Designed molecules. Diastereomeric ratios determined by NMR are shown.

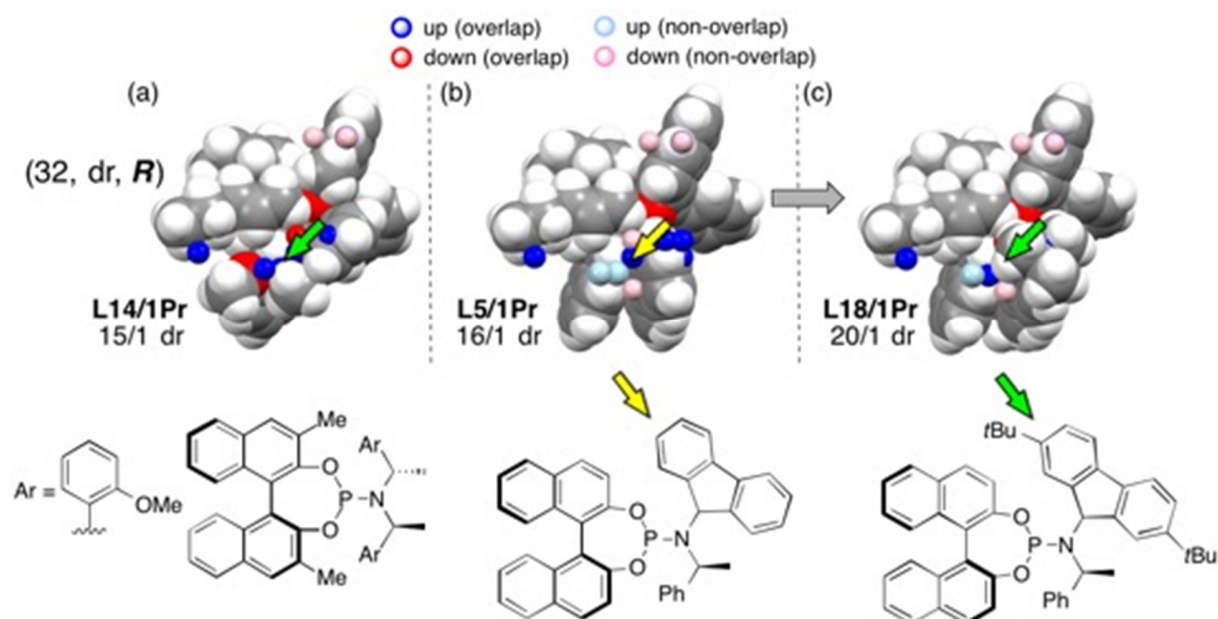

**Fig. S35.** Results of the MFA using dr data obtained from the 32 reactions with valine ligand **R**. (a) The origin of the blue point used for the molecular design. (b) Design templates. (c) Designed molecules. Diastereomeric ratios determined by NMR are shown.

**Table S17. Experimental and predicted values of dr data determined by NMR and enantioselectivity data. (test set)**

Diastereoselectivity (dr) of products **2Et** and **2Pr** are shown as  $\Delta\Delta G^\ddagger$  values (kcal/mol), which were used as the target variables for the regression analysis (**Exp.**). Predicted values (**Pred.**) and predicted values from leave-one-out cross-validation [**Pred. (CV)**] are also shown. Ligands for the 1st MFA are highlighted by yellow. Ligands designed at the 1st MFA are highlighted by green. The 2nd MFA was performed including the designed ligands. **L17** and **L18** are the optimum ligand for the reactions using valine derived ligands **S** and **R**, respectively. Predicted and measured  $\Delta\Delta G^\ddagger$  values in the reactions using the template and designed molecules are highlighted by red.

|                | 32 reactions ( <b>S</b> , dr) |              |            | 32 reactions ( <b>R</b> , dr) |              |            |
|----------------|-------------------------------|--------------|------------|-------------------------------|--------------|------------|
|                | Exp.                          | Pred.        | Pred. (CV) | Exp.                          | Pred.        | Pred. (CV) |
| <b>L1/1Pr</b>  | <b>0.721</b>                  | 0.72         | 0.795      | 1.461                         | 1.471        | 1.497      |
| <b>L2/1Et</b>  | 0.594                         | 0.605        | 0.619      | 1.221                         | 1.308        | 1.420      |
| <b>L2/1Pr</b>  | 0.836                         | 0.822        | 0.805      | 1.627                         | 1.529        | 1.433      |
| <b>L3/1Pr</b>  | 1.412                         | 1.427        | 1.489      | 1.480                         | 1.486        | 1.492      |
| <b>L4/1Et</b>  | 1.057                         | 1.055        | 1.267      | 1.215                         | 1.226        | 1.275      |
| <b>L4/1Pr</b>  | 1.510                         | 1.476        | 1.398      | 1.502                         | 1.486        | 1.471      |
| <b>L5/1Et</b>  | 0.099                         | 0.099        | 0.083      | 1.531                         | 1.511        | 1.488      |
| <b>L5/1Pr</b>  | 0.406                         | 0.406        | 0.316      | 1.786                         | <b>1.777</b> | 1.723      |
| <b>L6/1Et</b>  | 0.064                         | 0.085        | 0.104      | 1.504                         | 1.505        | 1.513      |
| <b>L7/1Pr</b>  | 0.295                         | 0.41         | 0.479      | 1.084                         | 1.174        | 1.224      |
| <b>L8/1Et</b>  | 0.294                         | 0.193        | 0.117      | 0.887                         | 0.953        | 1.007      |
| <b>L8/1Pr</b>  | 0.464                         | 0.41         | 0.385      | 1.314                         | 1.174        | 1.092      |
| <b>L9/1Et</b>  | -0.018                        | 0.01         | 0.031      | 0.960                         | 1.007        | 1.068      |
| <b>L9/1Pr</b>  | 0.203                         | 0.228        | 0.250      | 1.246                         | 1.228        | 1.211      |
| <b>L10/1Et</b> | 0.096                         | 0.119        | 0.139      | 1.136                         | 1.084        | 1.013      |
| <b>L10/1Pr</b> | 0.363                         | 0.336        | 0.311      | 1.290                         | 1.305        | 1.324      |
| <b>L11/1Et</b> | -0.039                        | -0.019       | -0.006     | 1.016                         | 0.976        | 0.922      |
| <b>L11/1Pr</b> | 0.182                         | 0.199        | 0.209      | 1.157                         | 1.197        | 1.243      |
| <b>L12/1Et</b> | 0.121                         | 0.121        | 0.083      | 0.908                         | 0.924        | 0.981      |
| <b>L13/1Et</b> | 0.442                         | 0.513        | 0.598      | 1.422                         | 1.337        | 1.226      |
| <b>L13/1Pr</b> | 0.804                         | 0.73         | 0.662      | 1.469                         | 1.558        | 1.676      |
| <b>L14/1Et</b> | 0.718                         | 0.716        | 1.007      | 1.596                         | 1.587        | 1.515      |
| <b>L14/1Pr</b> | 1.223                         | 1.224        | 1.236      | 1.749                         | 1.747        | 1.808      |
| <b>L15/1Pr</b> | 0.959                         | 0.954        | 0.852      | 0.879                         | 0.888        | 1.544      |
| <b>L16/1Pr</b> | 1.484                         | 1.451        | 1.308      | 1.551                         | 1.554        | 1.647      |
| <b>L1/1Et</b>  | 0.470                         | 0.605        |            | 1.154                         | 1.226        |            |
| <b>L3/1Et</b>  | 1.056                         | 0.916        |            | 1.185                         | 1.265        |            |
| <b>L6/1Pr</b>  | 0.372                         | 0.392        |            | 1.813                         | 1.726        |            |
| <b>L7/1Et</b>  | 0.080                         | 0.085        |            | 0.912                         | 0.876        |            |
| <b>L12/1Pr</b> | 0.344                         | 0.302        |            | 1.425                         | 1.145        |            |
| <b>L15/1Et</b> | 0.821                         | 0.737        |            | 0.716                         | 0.669        |            |
| <b>L16/1Et</b> | 1.038                         | 0.940        |            | 1.374                         | 1.333        |            |
| <b>L17/1Et</b> | 1.619                         | 0.636        |            | 0.257                         | 0.669        |            |
| <b>L17/1Pr</b> | <b>2.586</b>                  | <b>0.853</b> |            | 0.409                         | 0.890        |            |
| <b>L18/1Et</b> | 0.658                         | 0.398        |            | 1.914                         | 1.611        |            |
| <b>L18/1Pr</b> | 1.179                         | 0.615        |            | 1.917                         | <b>1.832</b> |            |



**Table S18.** Summary of the MFA using test samples.  $N_{sel}$  means the number of extracted descriptors.  $\alpha$  is the hyperparameter of Elastic Net shown in LASSO and Elastic Net regression section on page S93. The numbers of all the descriptors are 149 (25 samples). We evaluated the model based on Golbraikh-Trophsa criteria shown below<sup>26</sup>. Although the regression model generated through analysis of 25 dr data points in the reactions using ligand **R** shows low  $q^2$  values in comparison to  $R^2$  due to the small sample size and the sample selection method, all models fulfil Golbraikh-Tropsha criteria.

4. Coefficient of determination for a test set  $R^2_{pred} > 0.6$ ;
5. Leave-one-out cross-validated coefficient of determination  $q^2 > 0.5$ ;
6. One of the coefficients of determination for regressions of a test set through the origin (either predicted vs observed values  $R_o^2_{pred}$  or observed vs predicted values  $R'^2_{o_{pred}}$ ) should have value close to  $R^2_{pred}$ ;  
 $(R^2_{pred} - R_o^2_{pred})/R^2_{pred}$  or  $(R^2_{pred} - R'^2_{o_{pred}})/R^2_{pred} < 0.1$  and  $0.85 < k$  or  $k' < 1.15$ , where  $k$  and  $k'$  are slopes of the regression line through the origin.

|                                             | <b>S32dr</b> | <b>R32dr</b> |
|---------------------------------------------|--------------|--------------|
| $\alpha$                                    | 1            | 1            |
| $R^2$                                       | 0.99         | 0.96         |
| $q^2$                                       | 0.94         | 0.56         |
| $R^2_{pred}$                                | 0.96         | 0.89         |
| $N_{sel}$                                   | 28           | 42           |
| $R_o^2_{pred}$                              | 0.94         | 0.88         |
| $R'^2_{o_{pred}}$                           | 0.95         | 0.89         |
| $k$                                         | 1.07         | 1.03         |
| $k'$                                        | 0.92         | 0.96         |
| $(R^2_{pred} - R_o^2_{pred})/R^2_{pred}$    | 0.01         | <0.01        |
| $(R^2_{pred} - R'^2_{o_{pred}})/R^2_{pred}$ | <0.01        | <0.01        |

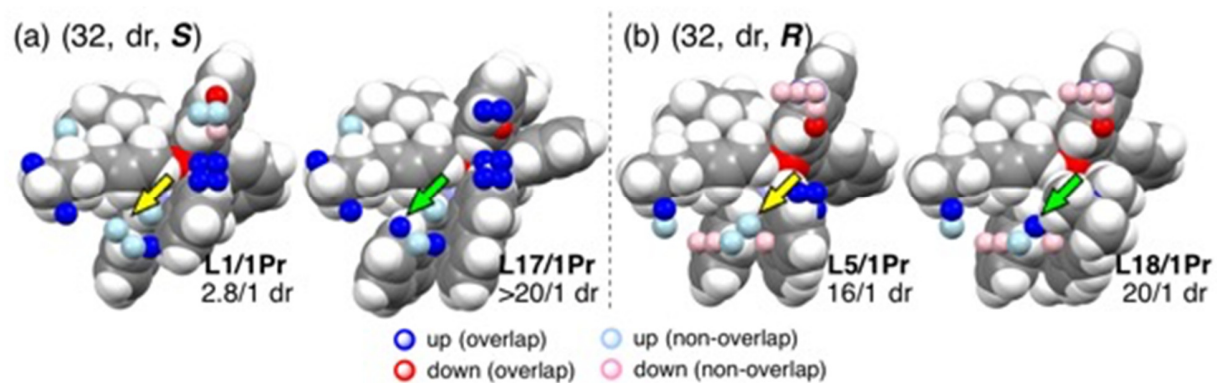

**Fig. S36.** (a), (b) Visualized important information from the regression models using 25 training samples. In parenthesis, the numbers of all samples including test samples are shown. Diastereomeric ratios determined by NMR are shown.

**Table S19. Experimental and predicted values of dr data determined by NMR and enantioselectivity data. (MFA in another design pathway)**

Diastereoselectivity (dr) of products **2Et** and **2Pr** are shown as  $\Delta\Delta G^\ddagger$  values (kcal/mol), which were used as the target variables for the regression analysis (**Exp.**). Predicted values (**Pred.**) and predicted values from leave-one-out cross-validation [**Pred. (CV)**] are also shown. Ligands for the 1st MFA are highlighted by yellow. Ligands designed at the 1st MFA are highlighted by green. The 2nd MFA was performed including the designed ligands. **L17** and **L18** are the optimum ligand for the reactions using valine derived ligands **S** and **R**, respectively. Predicted and measured  $\Delta\Delta G^\ddagger$  values in the reactions using the template and designed molecules are highlighted by red.

|         | 20 reactions ( <i>R</i> , dr) |       |            | 26 reactions ( <i>S</i> , dr) |        |            |
|---------|-------------------------------|-------|------------|-------------------------------|--------|------------|
|         | Exp.                          | Pred. | Pred. (CV) | Exp.                          | Pred.  | Pred. (CV) |
| L1/1Et  | 1.154                         | 1.193 | 1.242      | 0.470                         | 0.478  | 0.562      |
| L1/1Pr  | 1.461                         | 1.468 | 1.482      | 0.721                         | 0.732  | 0.746      |
| L2/1Et  | 1.221                         | 1.254 | 1.313      | 0.594                         | 0.582  | 0.572      |
| L2/1Pr  | 1.627                         | 1.529 | 1.446      | 0.836                         | 0.836  | 0.841      |
| L5/1Et  | 1.531                         | 1.499 | 1.489      | 0.099                         | 0.104  | 0.113      |
| L5/1Pr  | 1.786                         | 1.774 | 1.774      | 0.406                         | 0.400  | 0.389      |
| L6/1Et  | 1.504                         | 1.499 | 1.500      | 0.064                         | 0.079  | 0.107      |
| L6/1Pr  | 1.813                         | 1.774 | 1.762      | 0.372                         | 0.376  | 0.385      |
| L7/1Et  | 0.912                         | 0.934 | 0.938      | 0.080                         | 0.079  | 0.078      |
| L7/1Pr  | 1.084                         | 1.209 | 1.262      | 0.295                         | 0.430  | 0.494      |
| L8/1Et  | 0.887                         | 0.934 | 0.949      | 0.294                         | 0.176  | 0.111      |
| L8/1Pr  | 1.314                         | 1.209 | 1.160      | 0.464                         | 0.430  | 0.415      |
| L9/1Et  | 0.960                         | 1.009 | 1.029      | -0.018                        | -0.008 | -0.004     |
| L9/1Pr  | 1.246                         | 1.285 | 1.302      | 0.203                         | 0.246  | 0.280      |
| L10/1Et | 1.136                         | 1.009 | 0.961      | 0.096                         | 0.089  | 0.083      |
| L10/1Pr | 1.290                         | 1.285 | 1.283      | 0.363                         | 0.343  | 0.330      |
| L11/1Et | 1.016                         | 0.982 | 0.918      | -0.039                        | -0.045 | -0.060     |
| L11/1Pr | 1.157                         | 1.258 | 1.309      | 0.182                         | 0.209  | 0.235      |
| L12/1Et | 0.908                         | 1.027 | 1.174      | 0.121                         | 0.119  | 0.099      |
| L12/1Pr | 1.425                         | 1.303 | 1.223      | 0.344                         | 0.333  | 0.328      |
| L18/1Et | 1.914                         | 1.559 |            | 0.658                         | 0.783  | 0.942      |
| L18/1Pr | 1.917                         | 1.835 |            | 1.179                         | 1.037  | 0.868      |
| L13/1Et |                               |       |            | 0.442                         | 0.492  | 0.551      |
| L13/1Pr |                               |       |            | 0.804                         | 0.746  | 0.679      |
| L15/1Et |                               |       |            | 0.821                         | 0.791  | 0.692      |
| L15/1Pr |                               |       |            | 0.959                         | 0.972  | 1.065      |
| L17/1Et |                               |       |            | 1.619                         | 0.791  |            |
| L17/1Pr |                               |       |            | 2.586                         | 1.045  |            |

## Plots of the measured vs predicted values

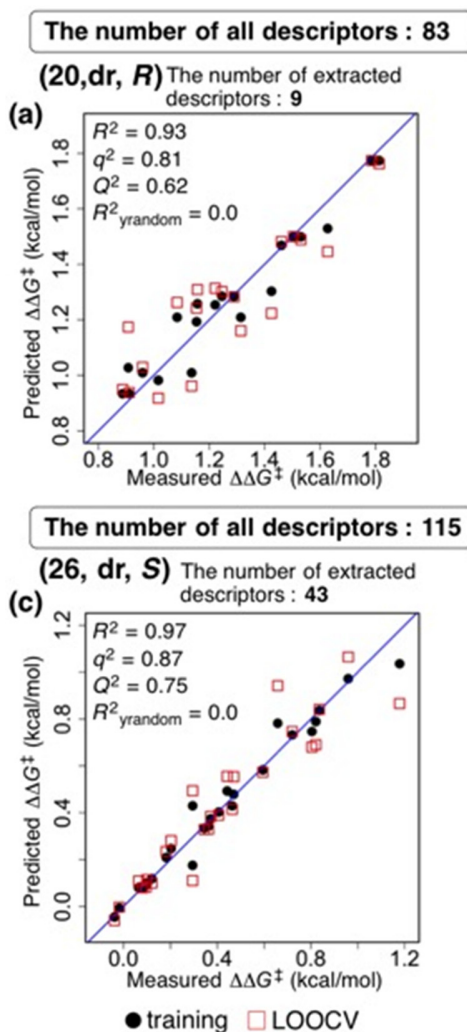

**Fig. S37.** Results of the MFA in another design pathway. (a), (b) Plots of the predicted (black dots) and the leave-one-out predicted (red squares) vs. measured  $\Delta\Delta G^\ddagger$  values.  $R^2$  : Coefficient of determination  $q^2$  : Leave-one-out cross-validated coefficient of determination.  $Q^2$  : 4-fold cross-validated coefficient of determination.  $R^2_{\text{random}}$  : Coefficient of determination calculated by y-randomization. The blue line is the  $x = y$  line

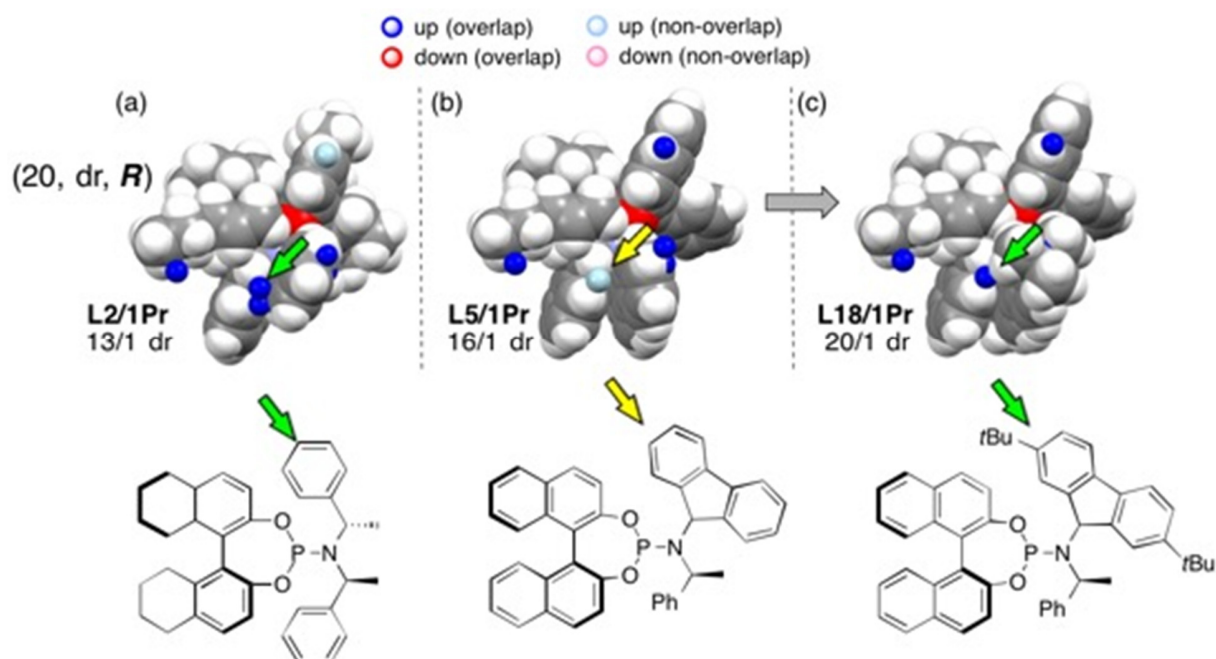

**Fig. S38.** Results of the MFA using dr data obtained from the 20 reactions with valine ligand **R**. (a) The origin of the blue point used for the molecular design. (b) Design templates. (c) Designed molecules. Diastereomeric ratios determined by NMR are shown.

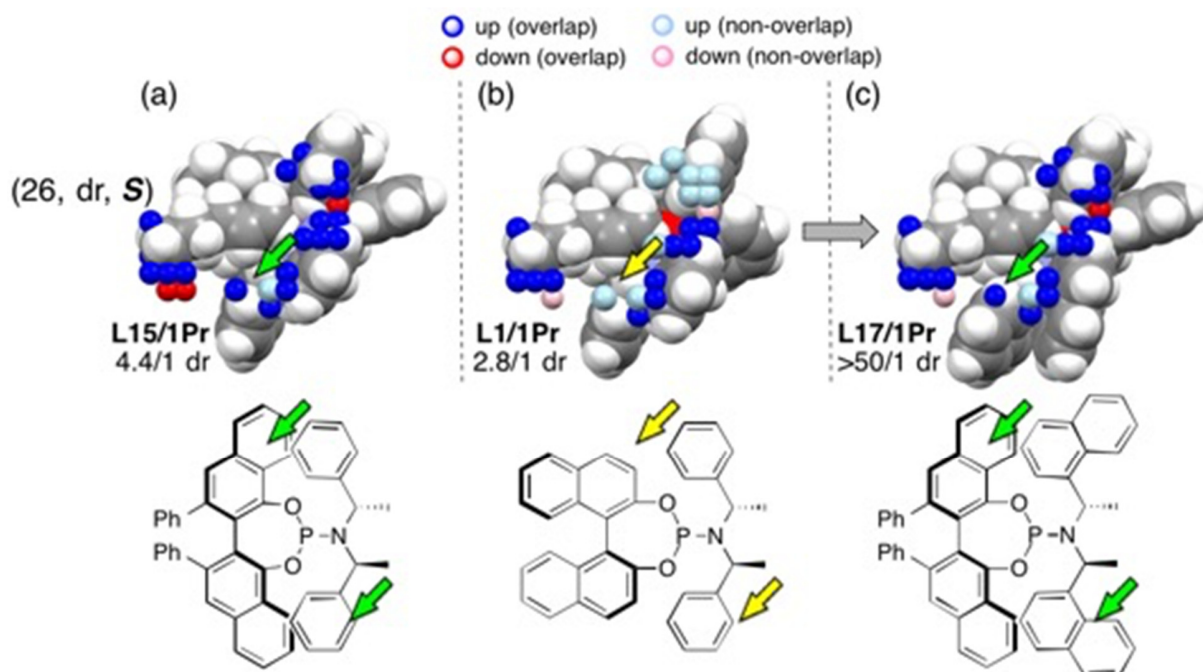

**Fig. S39.** Results of the MFA obtained from the 26 reactions with valine ligand **S**. (a) The origin of the blue point used for the molecular design. (b) Design templates. (c) Designed molecules. The MFA was performed using Elastic Net ( $\alpha = 0.5$ ). Diastereomeric ratios determined by NMR are shown.

MFA using structures optimized at the B3LYP-D3/LANL2DZ and 6-31G\* level

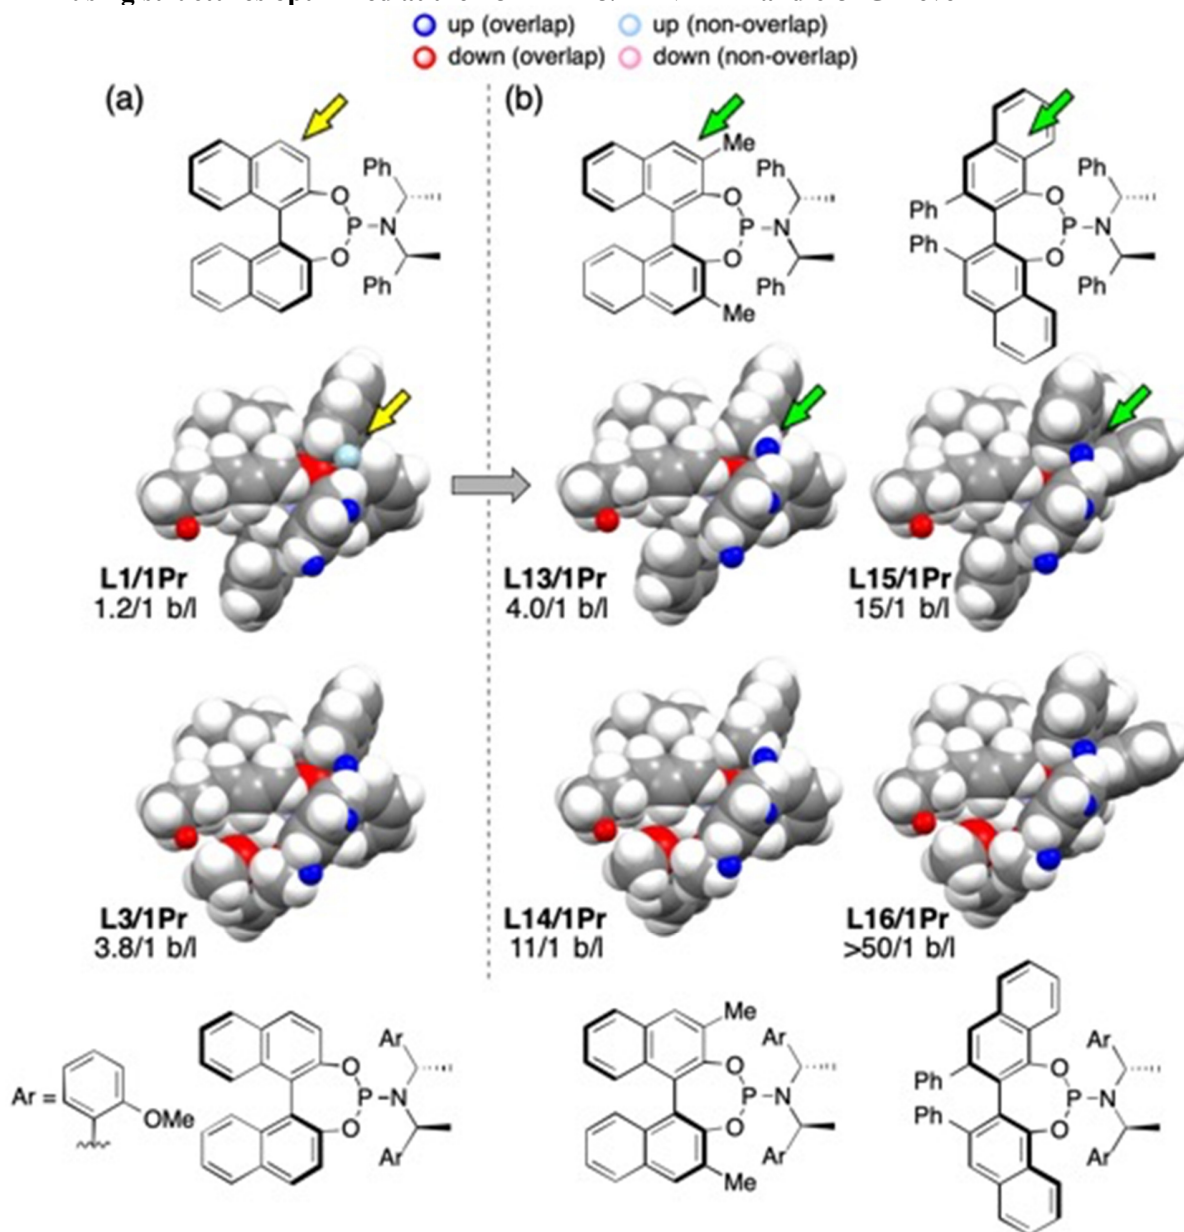

**Fig. S40.** Results of the MFA using b/l data obtained from the 24 reactions with valine ligand **S**. (a) Design templates. (b) Designed molecules.

In comparison to the MFA using structures optimized at B3LYP/LANL2DZ and 6-31G\* level (Fig. S4), we could not find the structural information that leads to the design of **L14** and **L16**.

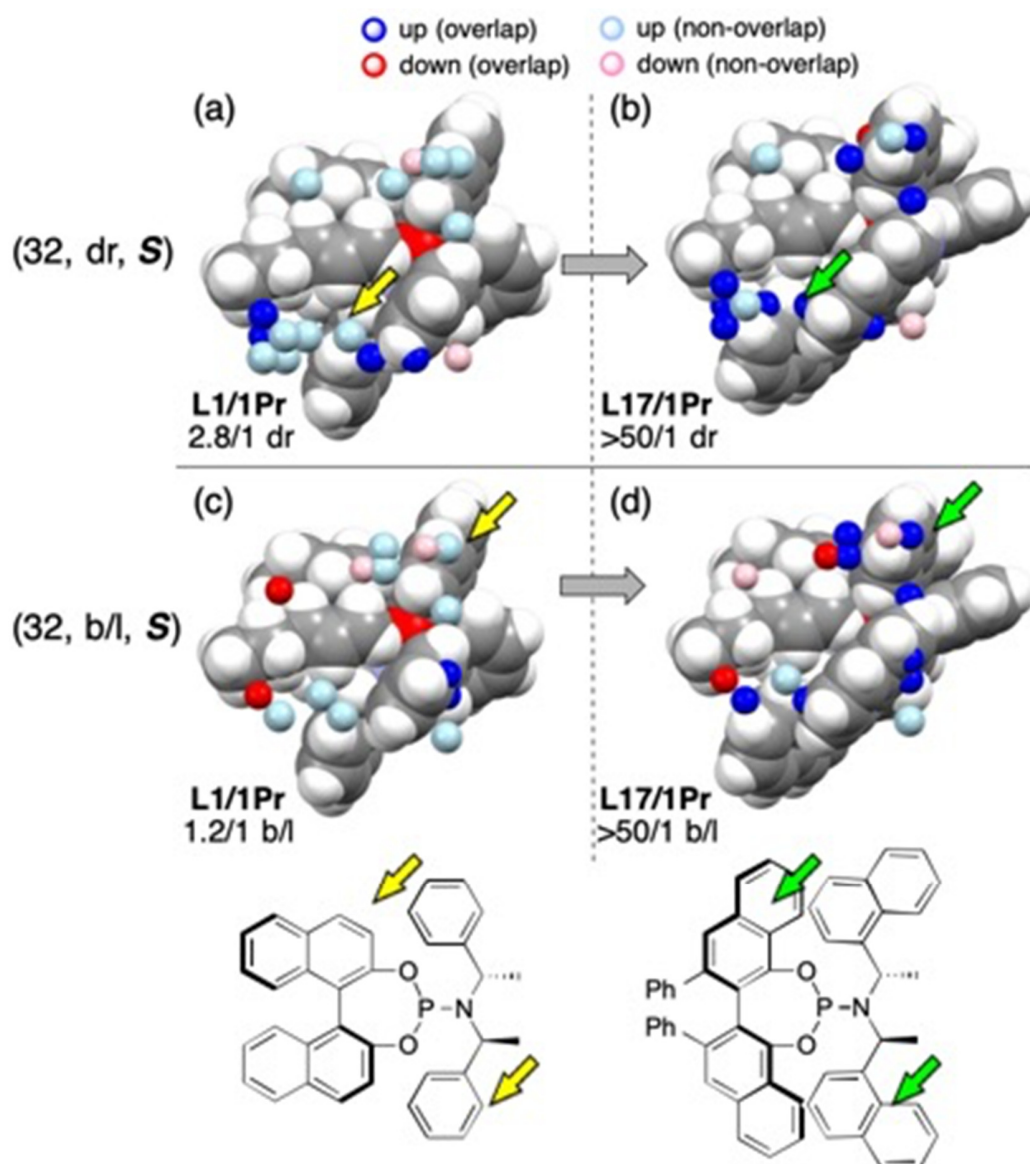

**Fig. S41.** Results of the MFA using b/l and dr data obtained from the 32 reactions with valine ligand **S**. (a), (c) Design templates. (b), (e) Designed molecules.



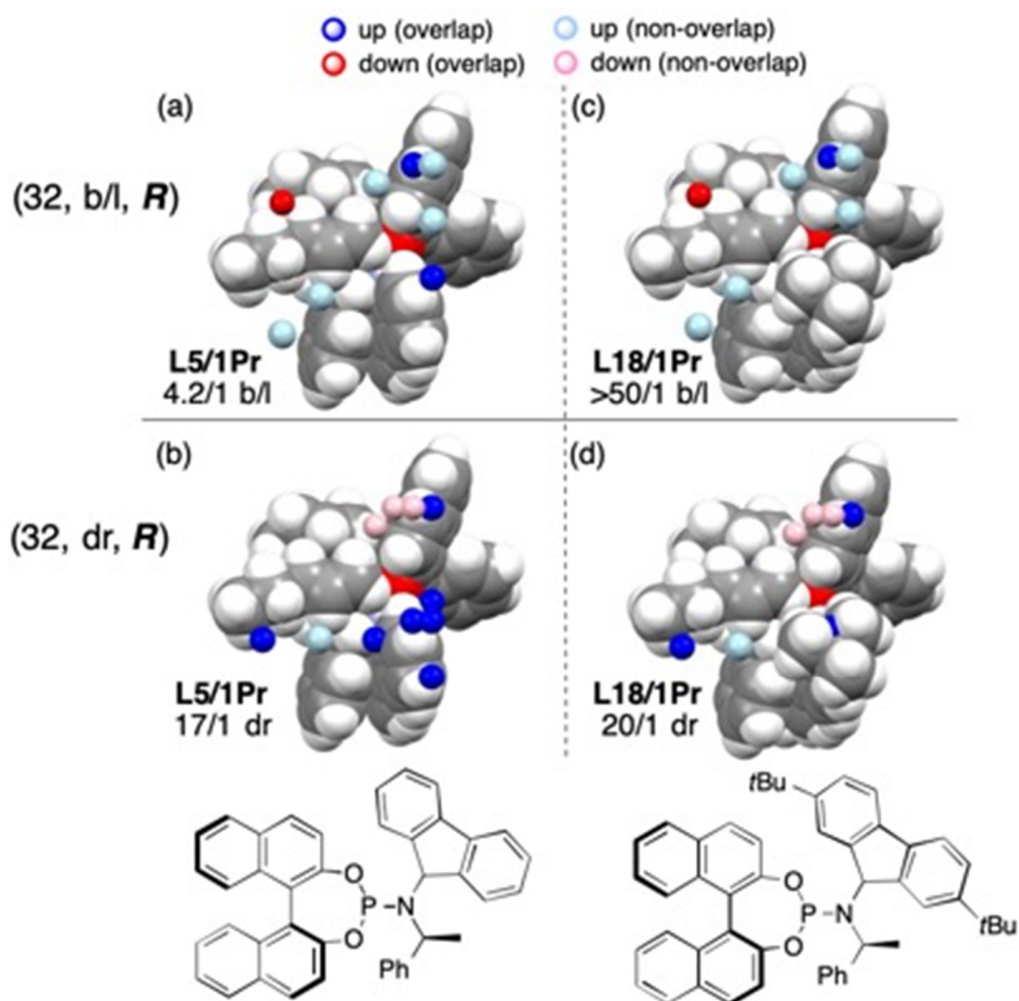

**Fig. S42.** Results of the MFA using b/l [(a) with **L5/1Pr** and (c) with **L18/1Pr**] and dr data [(b) with **L5/1Pr** and (d) with **L18/1Pr**] obtained from the 32 reactions with valine ligand *R*.

In comparison to the MFA using structures optimized at B3LYP/LANL2DZ and 6-31G\* level (Fig. S6), we could not find the structural information that leads to the design of **L18**.



## 12. References and Notes:

1. Urgin, K., Jida, M., Ehrhardt, K., Müller, T., Lanzer, M., Maes, L., Elhabiri, M. & Charvet, E. D. Pharmacomodulation of the Antimalarial Plasmodione: Synthesis of Biaryl- and *N*-Arylalkylamine Analogues, Antimalarial Activities and Physicochemical Properties. *Molecules*. **22**, 161-192 (2017).
2. Liang, S., Liu, J., Feng, D., Wang, Y., Xin, H. & Xu, Y. Synthesis of tetrabenzyl cytarabine. *Liaoning Huagong*. **42**, 1271-1273 (2013).
3. Smith, C. R., Mans, D. J., RajanBabu, T. V., Denmark, S. E. & Nguyen, S. T. (*R*)-2,2'-BINAPHTHOYL-(*S,S*)-DI(1-PHENYLETHYL) AMINOPHOSPHINE. SCALABLE PROTOCOLS FOR THE SYNTHESIS OF PHOSPHORAMIDITE (FERINGA) LIGANDS. *Org. Synth.* **85**, 238-247 (2008).
4. Rimkus, A. & Sewald, N. Conjugate Addition of Organozinc Compounds to Nitroolefins. *Synthesis* **1**, 135-146 (2004).
5. Varela, I., Faustino, H., Díez, E., Iglesias-Sigüenza, J., Grande-Carmona, F., Fernández, R., Lassaletta, J. M., Mascareñas, J. L. & López, F. Gold(I)-Catalyzed Enantioselective [2+2+2] Cycloadditions: An Expedient Entry to Enantioenriched Tetrahydropyran Scaffolds. *ACS Catal.* **7**, 2397-2402 (2017).
6. Leitner, A., Shu, C. & Hartwig, J. F. Effects of Catalyst Activation and Ligand Steric Properties on the Enantioselective Allylation of Amines and Phenoxides. *Org. Lett.* **7**, 1093-1096 (2005).
7. Shu, C., Leitner, A. & Hartwig, J. F. Enantioselective Allylation of Aromatic Amines after In Situ Generation of an Activated Cyclometalated Iridium Catalyst. *Angew. Chem., Int. Ed.* **43**, 4797-4800 (2004).
8. Frisch, M. J., Trucks, G. W., Schlegel, H. B., Scuseria, G. E., Robb, M. A., Cheeseman, J. R., Scalmani, G., Barone, V., Petersson, G. A., Nakatsuji, H., Li, X., Caricato, M., Marenich, A. V., Bloino, J., Janesko, B. G., Gomperts, R., Mennucci, B., Hratchian, H. P., Ortiz, J. V., Izmaylov, A. F., Sonnenberg, J. L., Williams-Young, D., Ding, F., Lipparini, F., Egidi, F., Goings, J., Peng, B., Petrone, A., Henderson, T., Ranasinghe, D., Zakrzewski, V. G., Gao, J., Rega, N., Zheng, G., Liang, W., Hada, M., Ehara, M., Toyota, K., Fukuda, R., Hasegawa, J., Ishida, M., Nakajima, T., Honda, Y., Kitao, O., Nakai, H., Vreven, T., Throssell, K., Montgomery, Jr., J. A., Peralta, J. E., Ogliaro, F., Bearpark, M. J., Heyd, J. J., Brothers, E. N., Kudin, K. N., Staroverov, V. N., Keith, T. A., Kobayashi, R., Normand, J., Raghavachari, K., Rendell, A. P., Burant, J. C., Iyengar, S. S., Tomasi, J., Cossi, M., Millam, J. M., Klene, M., Adamo, C., Cammi, R., Ochterski, J. W., Martin, R. L., Morokuma, K., Farkas, O., Foresman, J. B. & Fox, D. J. Gaussian, Inc., Wallingford CT, 2019.
9. Head-Gordon, M., Pople, J. A. & Frisch, M. J. MP2 energy evaluation by direct methods. *Chem. Phys. Lett.* **153**, 503-506 (1988).
10. Becke, A. D. Density-functional thermochemistry. III. The role of exact Exchange. *J. Chem. Phys.* **98**, 5648-5652 (1993).
11. Lee, C., Yang, W. & Parr, R. G. Development of the Colle-Salvetti correlation-energy formula into a functional of the electron density. *Phys. Rev. B: Condens. Matter Mater. Phys.* **37**, 785-789 (1988).
12. Vosko, S. H., Wilk, L. & Nusair, M. Accurate spin-dependent electron liquid correlation energies for local spin density calculations: a critical analysis. *Can. J. Phys.* **58**, 1200-1211 (1980).
13. Stephens, P. J., Devlin, F. J., Chabalowski, C. F. & Frisch, M. J. Ab initio calculation of vibrational absorption and circular dichroism spectra using density functional force fields. *J. Phys. Chem.* **98**, 11623-11627 (1994).

14. Hay, P. J. & Wadt, W. R. Ab initio effective core potentials for molecular calculations. Potentials for K to Au including the outermost core orbitals. *J. Chem. Phys.* **82**, 299-310 (1985).
15. Grimme, S., Antony, J., Ehrlich, S. & Krieg, H. A consistent and accurate ab initio parametrization of density functional dispersion correction (DFT-D) for the 94 elements H-Pu. *J. Chem. Phys.* **132**, 154104-154119 (2010).
16. Cramer, R. D., Patterson, D. E. & Bunce, J. D. Comparative molecular field analysis (CoMFA). 1. Effect of shape on binding of steroids to carrier proteins. *J. Am. Chem. Soc.* **110**, 5959-5967 (1988).
17. Kroemer, R. T. & Hecht, P. Replacement of steric 6-12 potential-derived interaction energies by atom-based indicator variables in CoMFA leads to models of higher consistency. *J. Comput. Aided Mol. Des.* **9**, 205-212 (1995).
18. Yamaguchi, S. & Sodeoka, M. Molecular field analysis using intermediates in enantio-determining steps can extract information for data-driven molecular design in asymmetric catalysis. *Bull. Chem. Soc. Jpn.* **92**, 1701-1706 (2019).
19. Yamaguchi, S., Nishimura, T., Hibe, Y., Nagai, M., Sato, H. & Johnston, I. Regularized regression analysis of digitized molecular structures in organic reactions for quantification of steric effects. *J. Comp. Chem.* **38**, 1825-1833 (2017).
20. Melville, J. L., Lovelock, K. R. J., Wilson, C., Allbutt, B., Burke, E. K., Lygo, B. & Hirst, J. D. Exploring phase-transfer catalysis with molecular dynamics and 3D/4D quantitative structure-selectivity relationships. *J. Chem. Inf. Model.* **45**, 971-981 (2005).
21. Denmark, S. E., Gould, N. D. & Wolf, L. M. A systematic investigation of quaternary ammonium ions as asymmetric phase-transfer catalysts. Application of quantitative structure activity/selectivity relationships. *J. Org. Chem.* **76**, 4337-4357 (2011).
22. Hartwig, J. F. & Stanley, L. M. Mechanistically driven development of iridium catalysts for asymmetric allylic substitution. *Acc. Chem. Res.* **43**, 1461-1475 (2010).
23. Madrahimov, S. T., Markovic, D. & Hartwig, J. F. The allyl intermediate in regioselective and enantioselective iridium-catalyzed asymmetric allylic substitution reactions. *J. Am. Chem. Soc.* **131**, 7228-7229 (2009).
24. Tibshirani, R. Regression shrinkage and selection via the LASSO. *J. R. Stat. Soc. B* **58**, 267-288 (1996).
25. Zou, H. & Hastie, T. Regularization and variable selection via the elastic net. *J. R. Stat. Soc. B* **67**, 301-320 (2005).
26. Friedman, J., Hastie, T. & Tibshirani, R. Regularization paths for generalized linear models via coordinate descent. *J. Stat. Softw.* **33**, 1-22 (2010).
27. Golbraikh, A. & Tropsha, A. Beware of  $q^2$ ! *J. Mol. Graph. Model.* **20**, 269-276 (2002).
28. Alexander, D. L. J., Tropsha, A. & Winkler, D. A. Beware of  $R^2$ : Simple, unambiguous assessment of the prediction accuracy of QSAR and QSPR models. *J. Chem. Inf. Model.* **55**, 1316-1322 (2015).
29. Hansch, C., Leo, A. & Hoekman, D. H. Exploring QSAR, Fundamentals and application in chemistry and biology; American Chemical Society: Washington, DC, USA (1995).
30. Li, L., Pan, Y. & Lei, M. The enantioselectivity in asymmetric ketone hydrogenation catalyzed by  $\text{RuH}_2(\text{diphosphine})(\text{diamine})$  complexes: insights from a 3D-QSSR and DFT study. *Catal. Sci. Technol.* **6**, 4450-4457 (2016).

31. Ianni, J. C., Annamalai, V., Phuan, P.-W., Panda, M. & Kozlowski, M. C. A priori theoretical prediction of selectivity in asymmetric catalysis: Design of chiral catalysts by using quantum molecular interaction fields. *Angew. Chem. Int. Ed.* **45**, 5502-5505 (2006).
32. Huang, J., Ianni, J. C., Antoline, J. E., Hsung, R. P. & Kozlowski, M. C. De novo chiral amino alcohols in catalyzing asymmetric additions to aryl aldehydes. *Org. Lett.* **8**, 1565-1568 (2006).
33. Pedregosa F. et al., Scikit-learn: Machine learning in Python. *J. Mach. Learn. Res.* **12**, 2825–2830 (2011).
34. Zhao, Y. & Truhlar, D. G. The M06 suite of density functionals for main group thermochemistry, thermochemical kinetics, noncovalent interactions, excited states, and transition elements: two new functionals and systematic testing of four M06-class functionals and 12 other functionals. *Theor. Chem. Account* **120**, 215–241 (2008).
35. Marenich, A. V., Cramer, C. J. & Truhlar, D. G. Universal Solvation Model Based on Solute Electron Density and on a Continuum Model of the Solvent Defined by the Bulk Dielectric Constant and Atomic Surface Tensions. *J. Phys. Chem. B* **113**, 6378 (2009).

# 13. NMR Charts

C:\Users\Valice\Desktop\ChenSM\1a\_proton.als

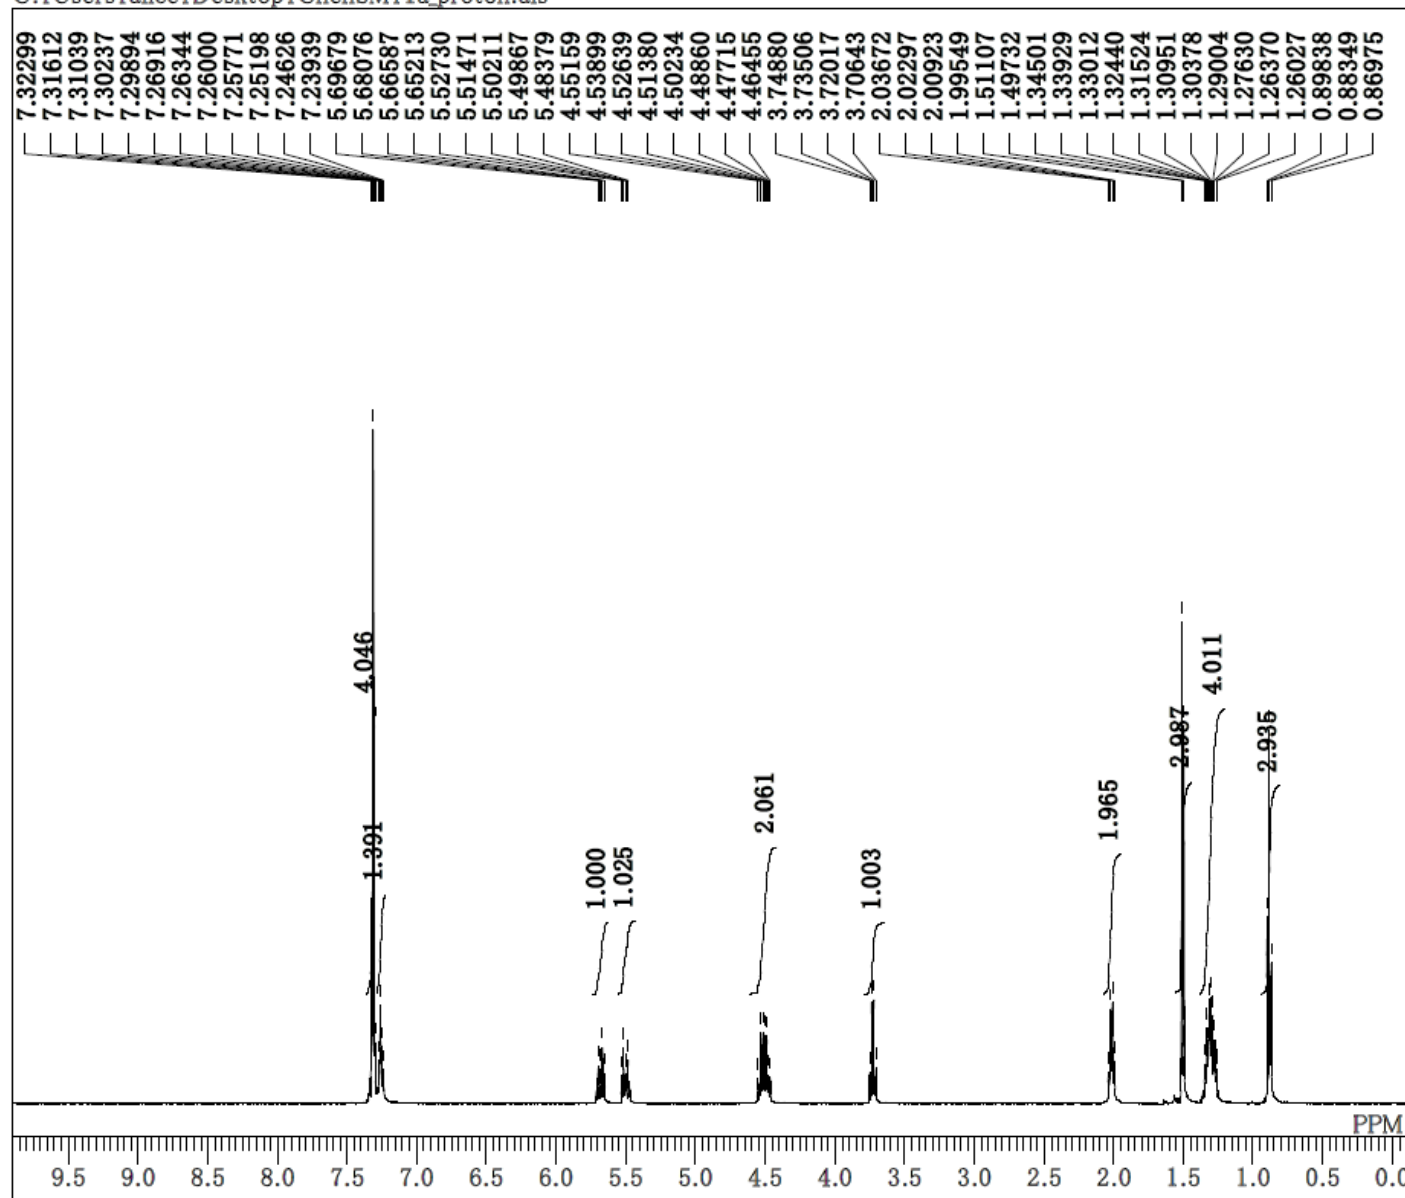

DFILE 1a\_proton.als  
COMNT  
DATIM 2020-04-09 21:06:02  
OBNUC 1H  
EXMOD proton.jxp  
OBFRQ 500.16 MHz  
OBSET 2.41 KHz  
OBFIN 6.01 Hz  
POINT 13107  
FREQU 7507.51 Hz  
SCANS 8  
ACQTM 1.7459 sec  
PD 6.0000 sec  
PW1 5.55 usec  
IRNUC 1H  
CTEMP 21.6 c  
SLVNT CDCL3  
EXREF 7.26 ppm  
BF 0.12 Hz  
RGAIN 40

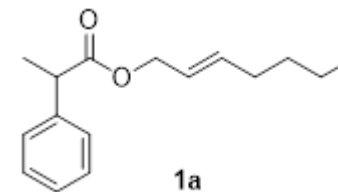

C:\Users\Valice\Desktop\ChenSM\1a\_carbon.als

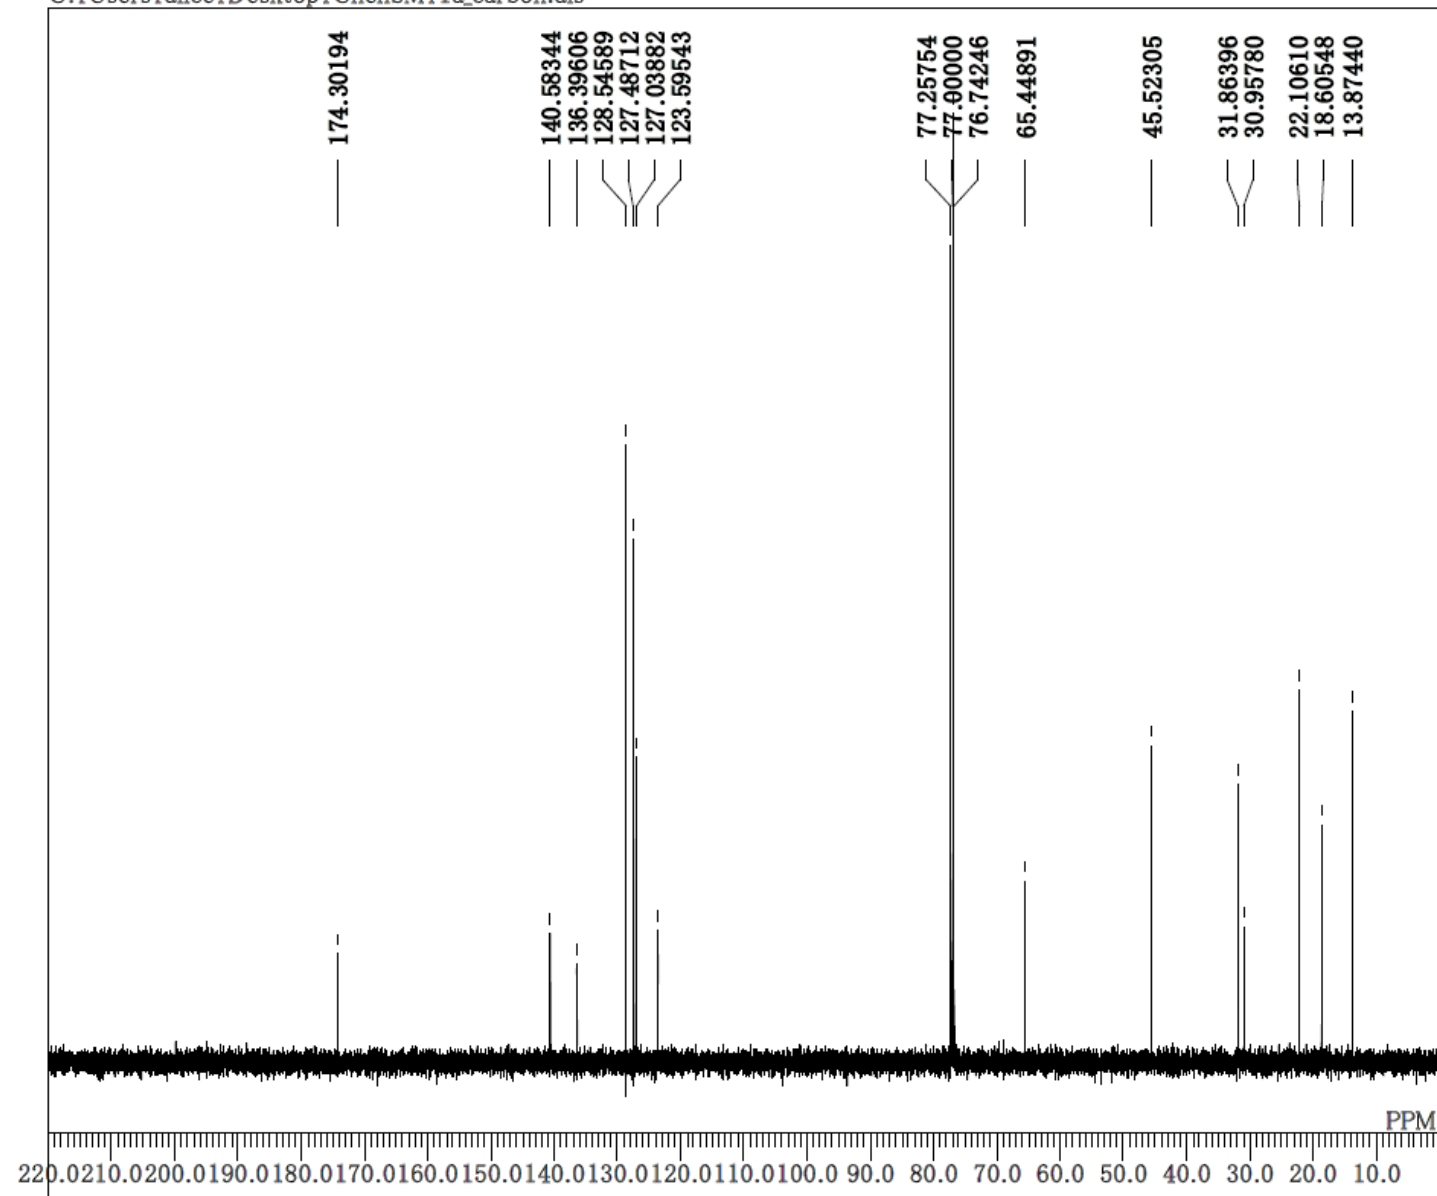

|       |                     |
|-------|---------------------|
| DFILE | 1a_carbon.als       |
| COMNT |                     |
| DATIM | 2020-04-09 20:58:42 |
| OBNUC | 13C                 |
| EXMOD | carbon.jxp          |
| OBFRQ | 125.77 MHz          |
| OBSET | 7.87 KHz            |
| OBFIN | 4.21 Hz             |
| POINT | 26214               |
| FREQU | 31446.54 Hz         |
| SCANS | 119                 |
| ACQTM | 0.8336 sec          |
| PD    | 2.0000 sec          |
| PW1   | 3.40 usec           |
| IRNUC | 1H                  |
| CTEMP | 21.5 c              |
| SLVNT | CDCL3               |
| EXREF | 77.00 ppm           |
| BF    | 0.12 Hz             |
| RGAIN | 60                  |

C:\Users\Valice\Desktop\ChenSM\1b\_proton.als

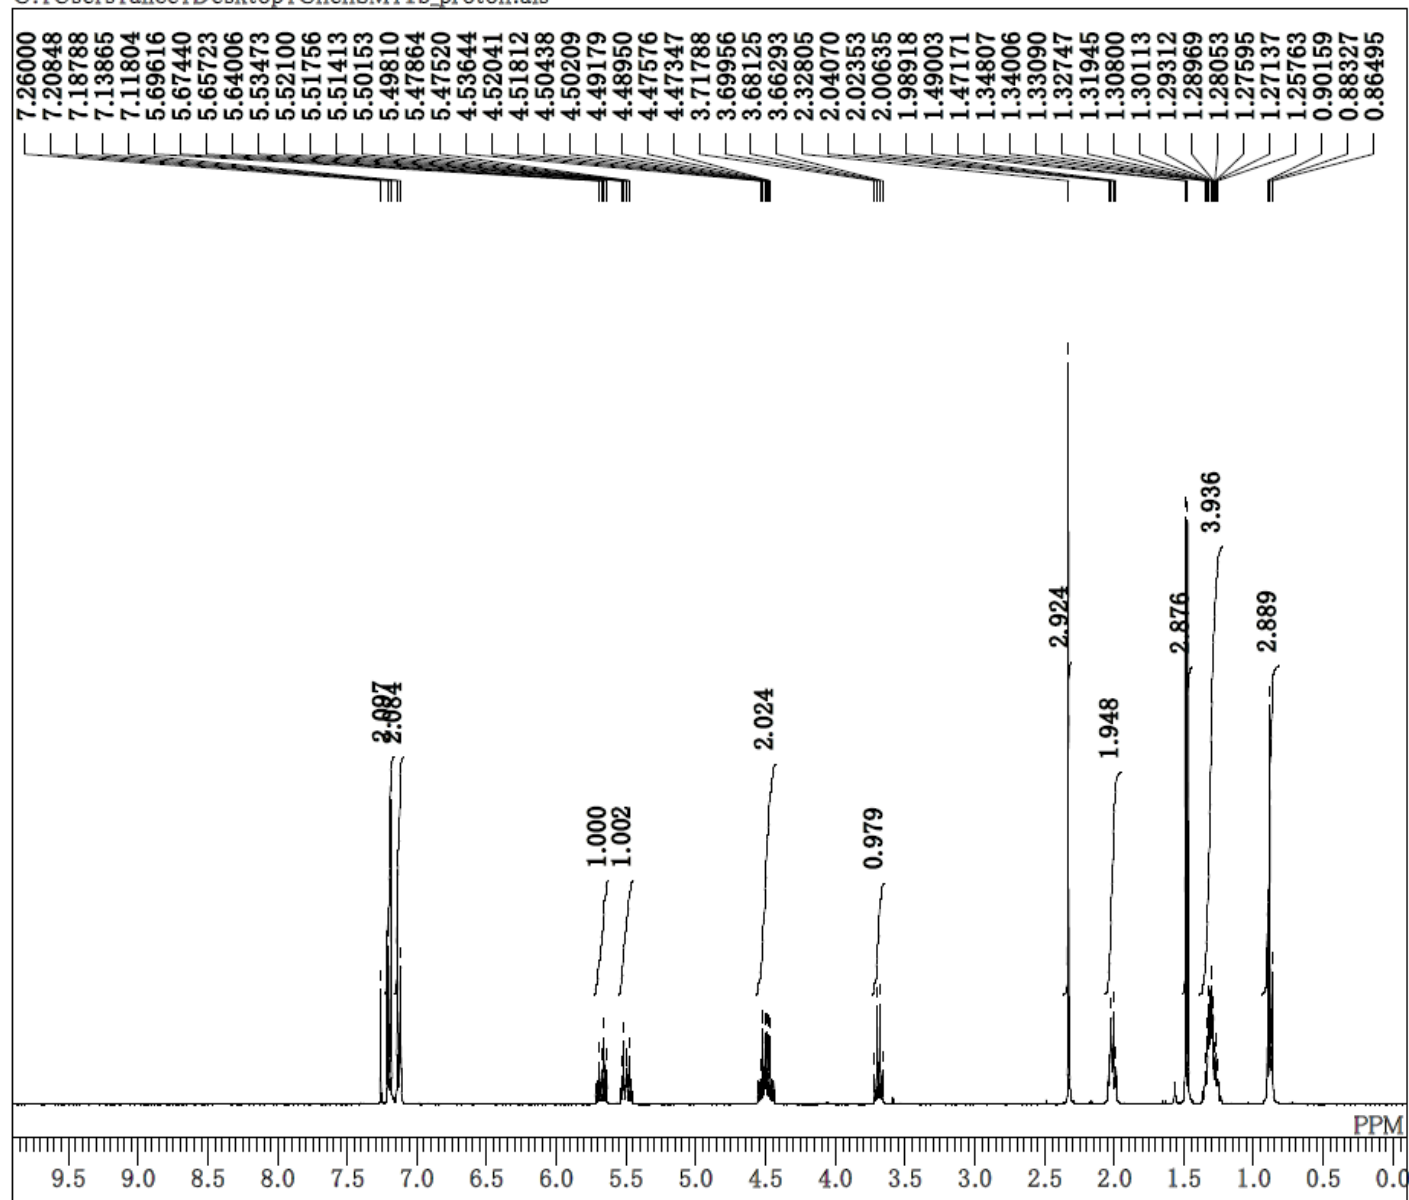

DFILE 1b\_proton.als  
 COMNT  
 DATIM 23-03-2020 13:49:42  
 OBNUC 1H  
 EXMOD proton.jxp  
 OBFRQ 391.78 MHz  
 OBSET 8.51 KHz  
 OBFIN 3.34 Hz  
 POINT 13107  
 FREQU 5878.90 Hz  
 SCANS 8  
 ACQTM 2.2295 sec  
 PD 6.0000 sec  
 PW1 5.17 usec  
 IRNUC 1H  
 CTEMP 20.4 c  
 SLVNT CDCL3  
 EXREF 7.26 ppm  
 BF 0.12 Hz  
 RGAIN 36

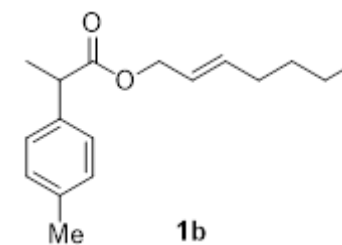

C:\Users\Valice\Desktop\ChenSM\1b\_carbon-1-1.als

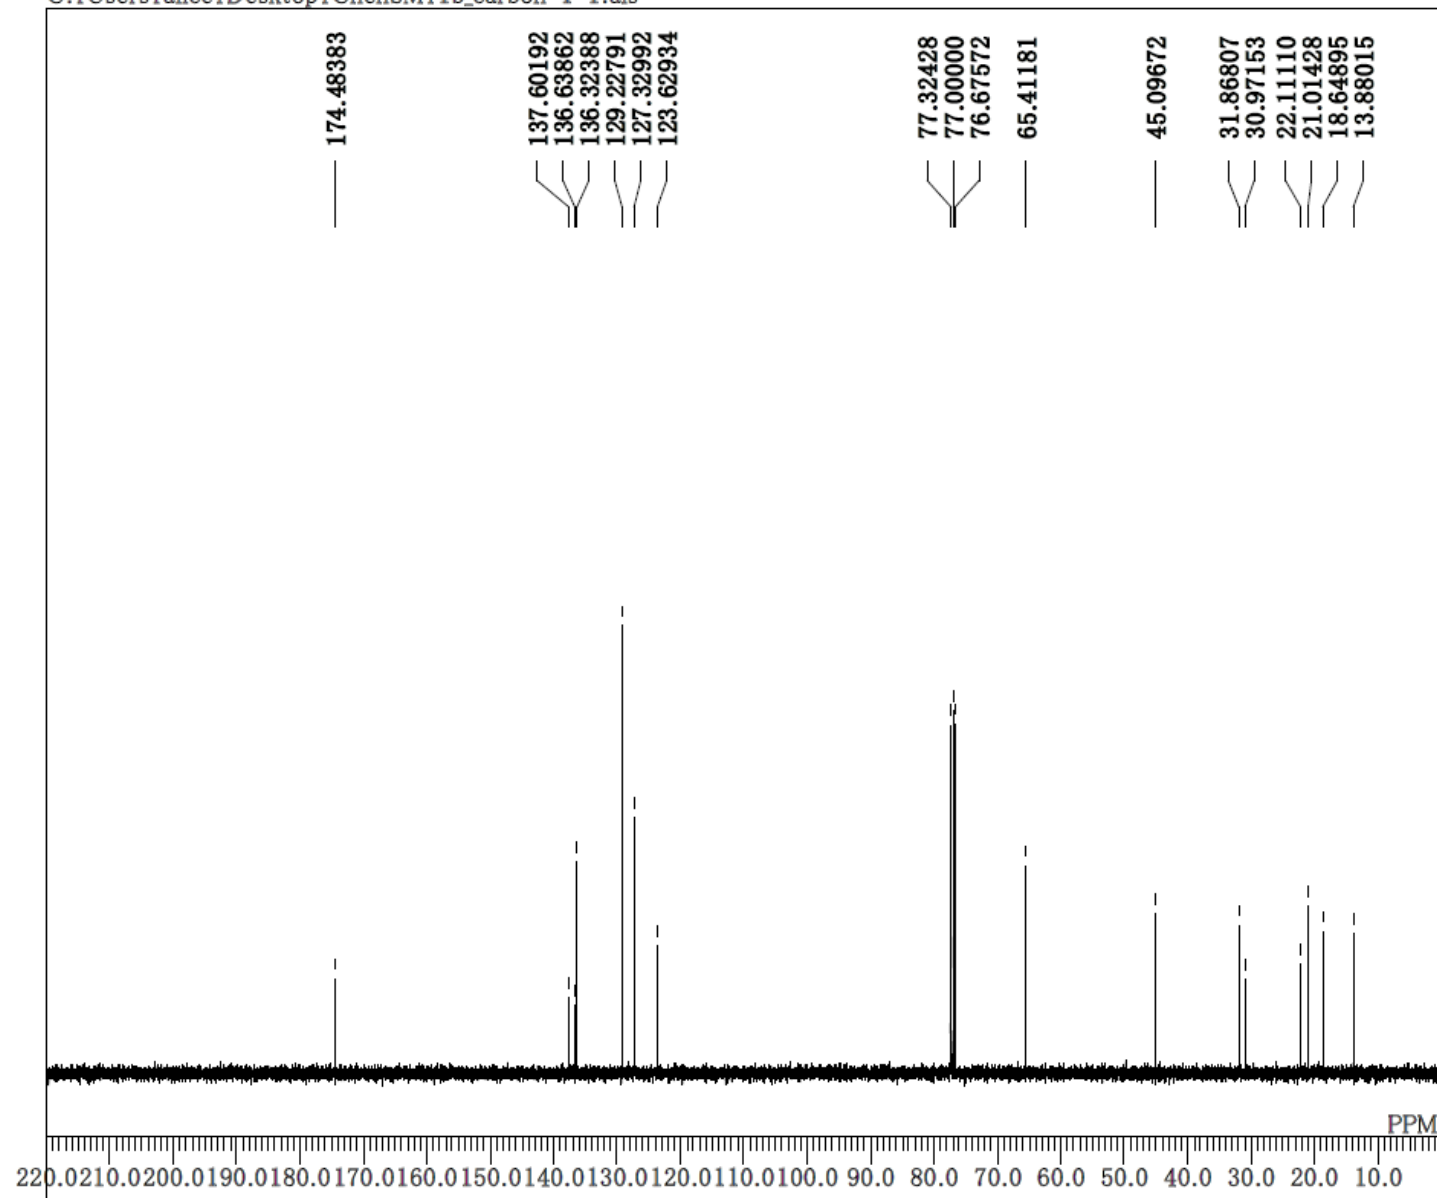

DFILE 1b\_carbon-1-1.als  
 COMNT  
 DATIM 12-07-2019 13:17:06  
 OBNUC 13C  
 EXMOD carbon.jpg  
 OBFRQ 98.52 MHz  
 OBSET 4.64 KHz  
 OBFIN 8.74 Hz  
 POINT 26214  
 FREQU 24630.54 Hz  
 SCANS 112  
 ACQTM 1.0643 sec  
 PD 2.0000 sec  
 PW1 3.12 usec  
 IRNUC 1H  
 CTEMP 20.9 c  
 SLVNT CDCL3  
 EXREF 77.00 ppm  
 BF 0.12 Hz  
 RGAIN 60

C:\Users\alice\Desktop\ChenSM\1c\_proton.als

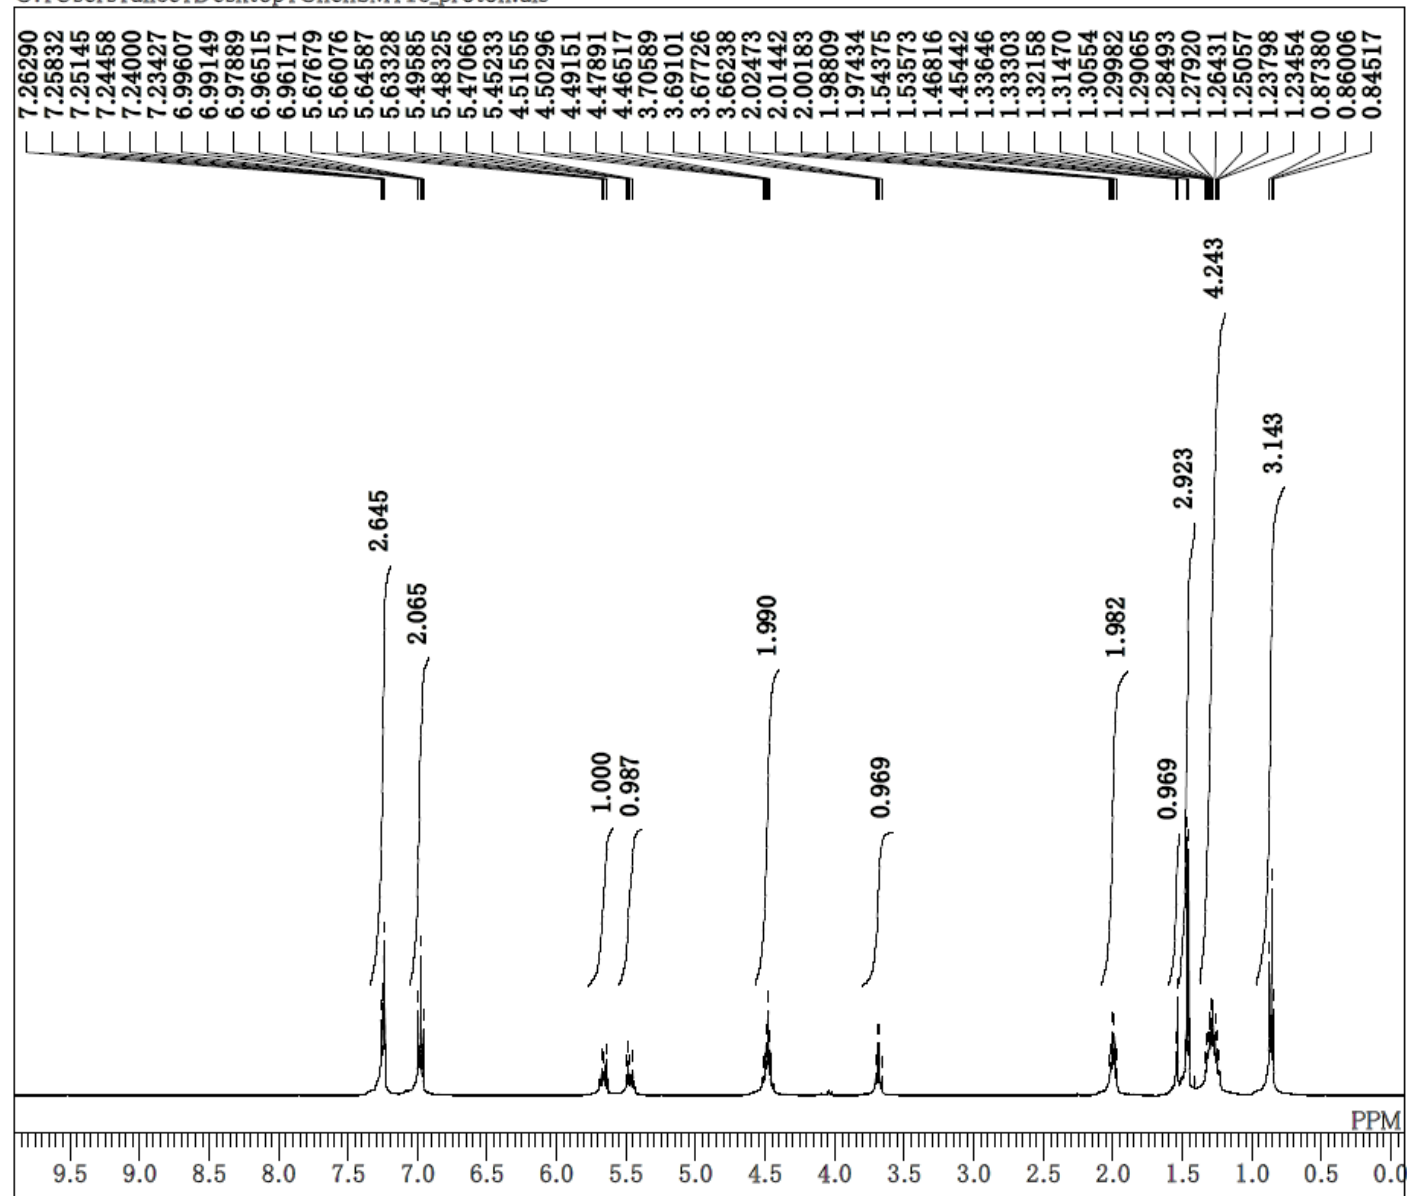

DFILE 1c\_proton.als  
 COMNT  
 DATIM 2019-06-29 02:03:11  
 OBNUC 1H  
 EXMOD proton.jxp  
 OBFRQ 500.16 MHz  
 OBSET 2.41 KHz  
 OBFIN 6.01 Hz  
 POINT 13107  
 FREQU 7507.51 Hz  
 SCANS 8  
 ACQTM 1.7459 sec  
 PD 6.0000 sec  
 PW1 5.55 usec  
 IRNUC 1H  
 CTEMP 21.7 c  
 SLVNT CDCL3  
 EXREF 7.24 ppm  
 BF 0.12 Hz  
 RGAIN 38

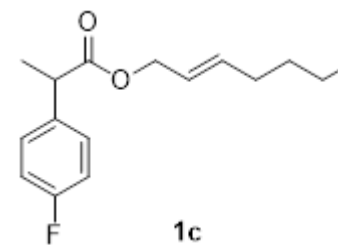



C:\Users\alice\Desktop\ChenSM\1c\_carbon.als

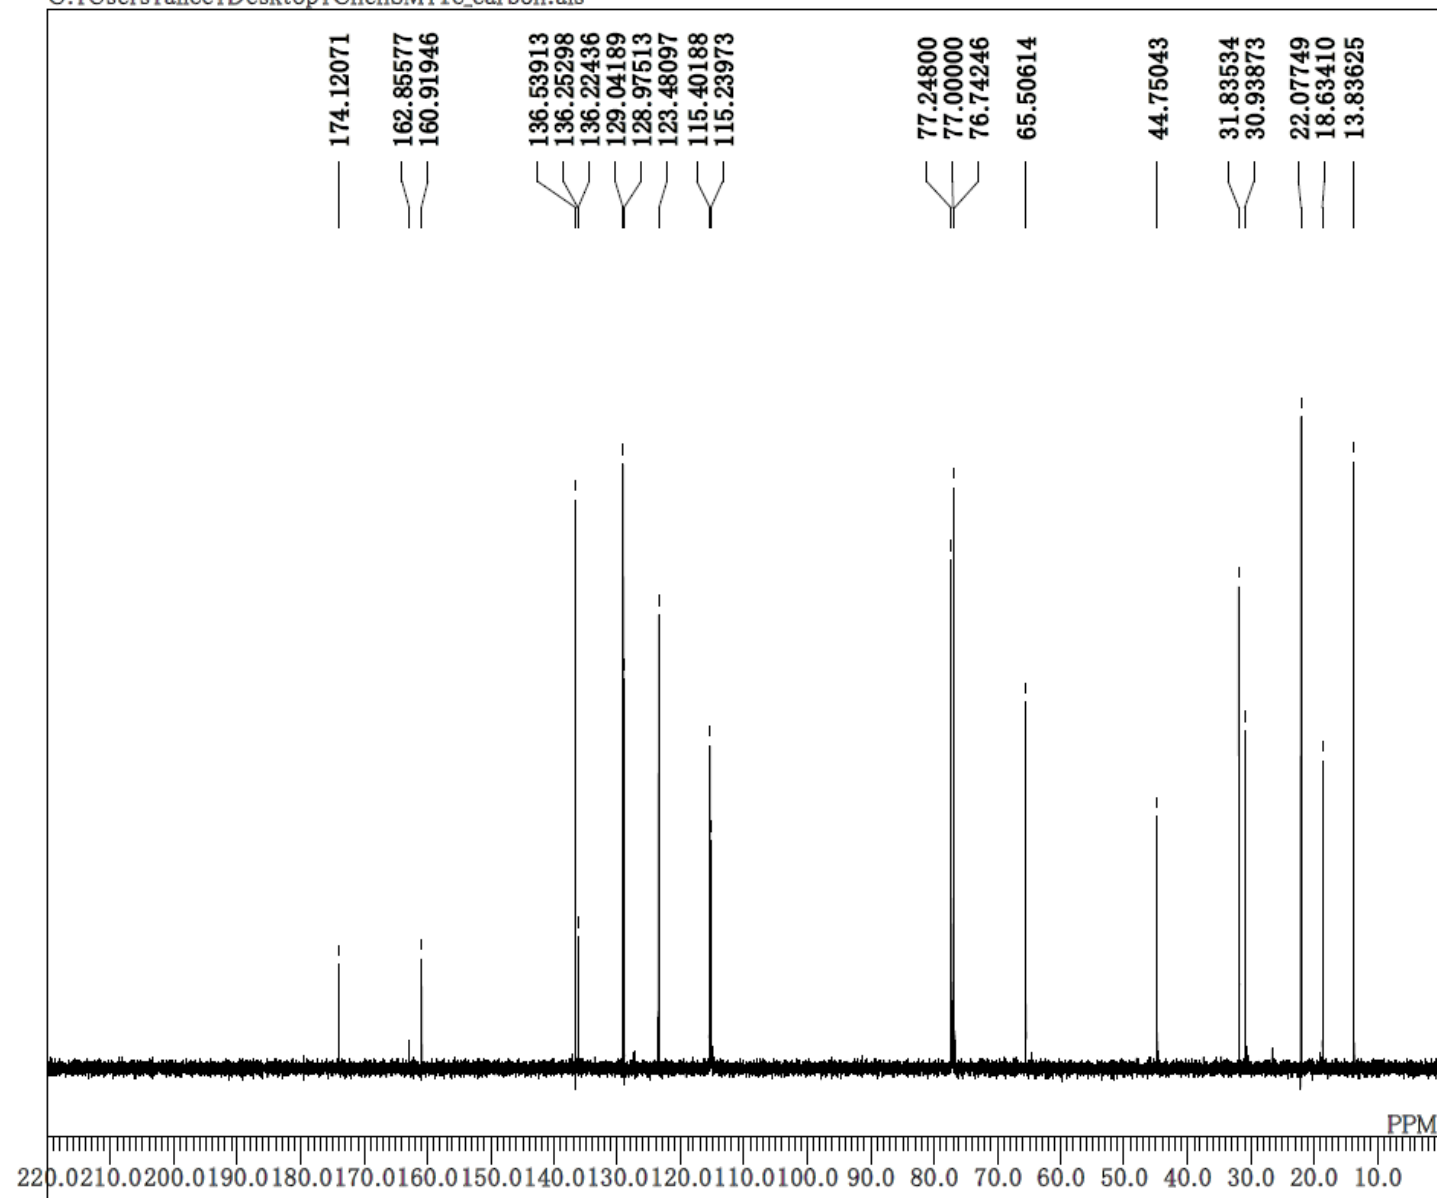

DFILE 1c\_carbon.als  
 COMNT  
 DATIM 2019-06-29 02:19:32  
 OBNUC 13C  
 EXMOD carbon.jpg  
 OBFRQ 125.77 MHz  
 OBSET 7.87 KHz  
 OBFIN 4.21 Hz  
 POINT 26214  
 FREQU 31446.54 Hz  
 SCANS 132  
 ACQTM 0.8336 sec  
 PD 2.0000 sec  
 PW1 3.40 usec  
 IRNUC 1H  
 CTEMP 22.1 c  
 SLVNT CDCL3  
 EXREF 77.00 ppm  
 BF 0.12 Hz  
 RGAIN 60

C:\Users\Yalice\Desktop\ChenSM\1c\_F.als

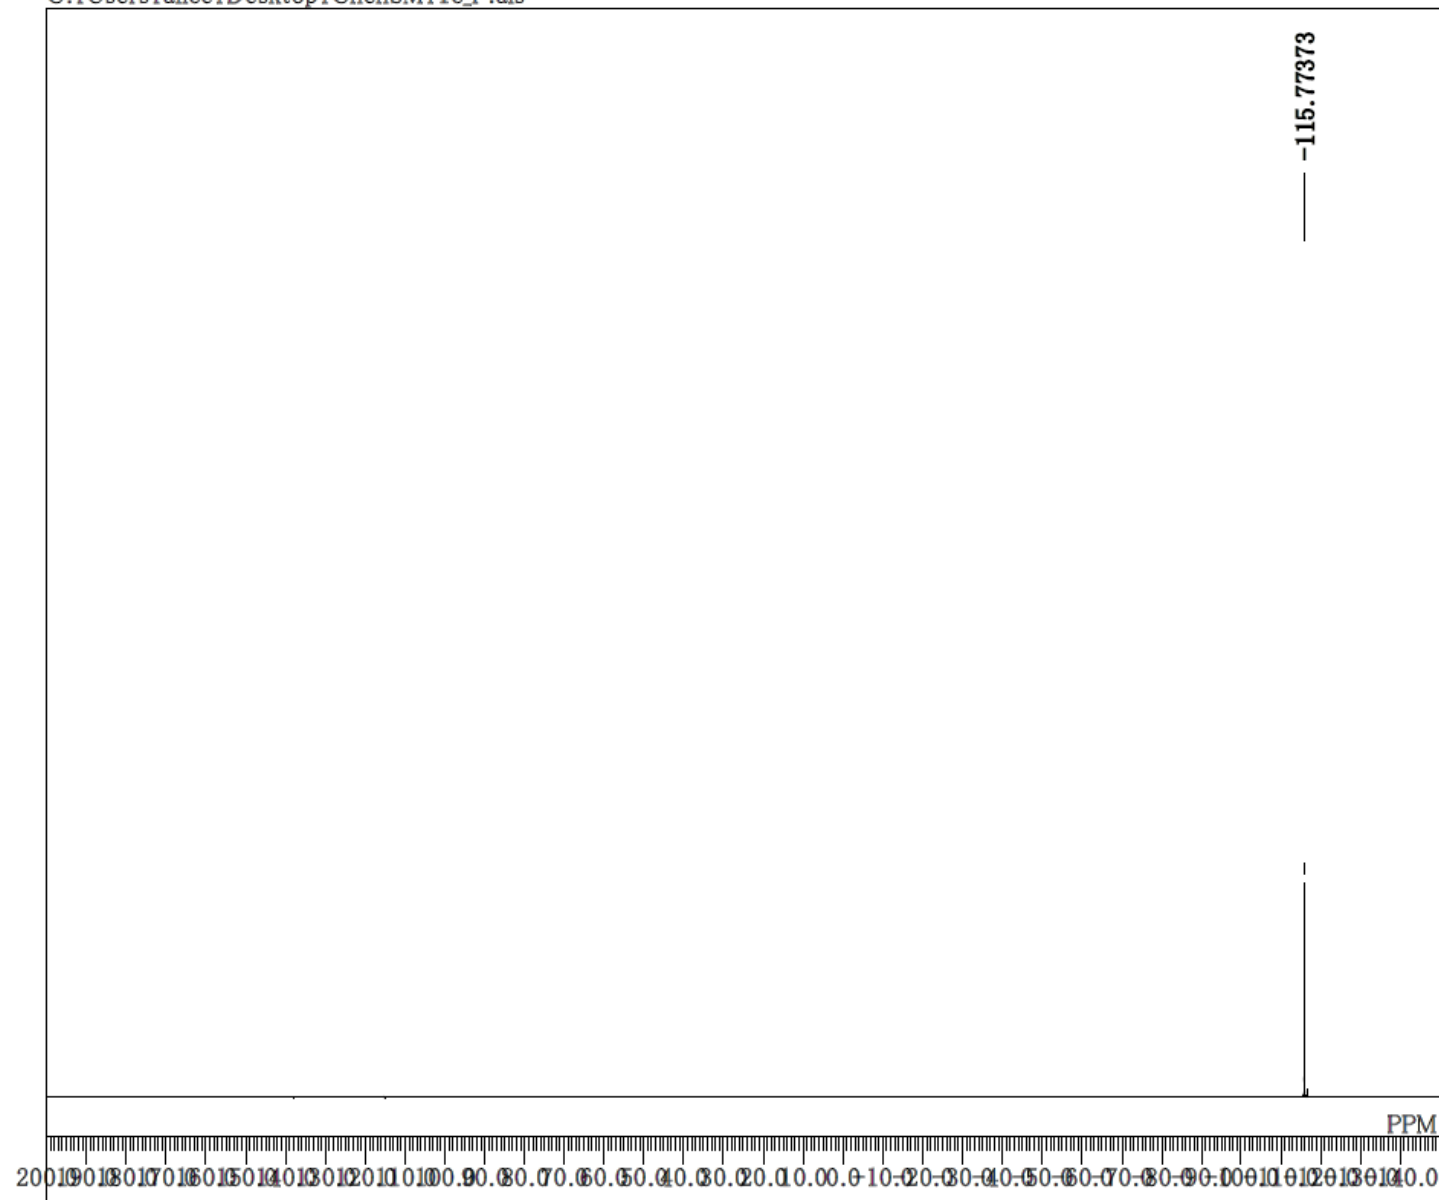

|       |                     |
|-------|---------------------|
| DFILE | 1c_F.als            |
| COMNT |                     |
| DATIM | 15-06-2020 19:22:47 |
| OBNUC | 19F                 |
| EXMOD | proton.jxp          |
| OBFRQ | 368.64 MHz          |
| OBSET | 7.63 KHz            |
| OBFIN | 2.85 Hz             |
| POINT | 13107               |
| FREQU | 149253.73 Hz        |
| SCANS | 16                  |
| ACQTM | 0.0878 sec          |
| PD    | 6.0000 sec          |
| PW1   | 4.10 usec           |
| IRNUC | 19F                 |
| CTEMP | 20.9 c              |
| SLVNT | CDCL3               |
| EXREF | 0.00 ppm            |
| BF    | 1.00 Hz             |
| RGAIN | 50                  |

<sup>1</sup>H NMR spectrum of compound 10a in CDCl<sub>3</sub>. The x-axis represents the chemical shift in PPM, ranging from 0.0 to 9.5. The spectrum shows several peaks, with the following chemical shifts (PPM) labeled on the right side:

- 7.28175
- 7.27603
- 7.26572
- 7.26000
- 7.24397
- 7.24054
- 7.23023
- 7.21421
- 7.20848
- 5.68585
- 5.66868
- 5.66525
- 5.64693
- 5.50382
- 5.48780
- 5.48436
- 5.47177
- 5.46833
- 5.44887
- 4.49522
- 4.48149
- 4.46775
- 4.46546
- 3.70529
- 3.68697
- 3.66865
- 3.65034
- 2.02925
- 2.00864
- 1.99147
- 1.97430
- 1.47171
- 1.45340
- 1.33090
- 1.32289
- 1.31258
- 1.30915
- 1.30228
- 1.29999
- 1.29312
- 1.29083
- 1.28740
- 1.28167
- 1.27824
- 1.27251
- 1.26107
- 1.25534
- 1.25191
- 1.24275
- 1.23817
- 0.88441
- 0.86610
- 0.84778

Integration values are shown below the peaks:

- 1.000
- 1.005
- 2.027
- 1.006
- 2.093
- 2.936
- 4.106
- 2.940

|       |                     |
|-------|---------------------|
| DFILE | 1d_proton.als       |
| COMNT |                     |
| DATIM | 14-08-2019 01:50:31 |
| OBNUC | 1H                  |
| EXMOD | proton.jxp          |
| OBFRQ | 391.78 MHz          |
| OBSET | 8.51 KHz            |
| OBFIN | 3.34 Hz             |
| POINT | 13107               |
| FREQU | 5878.90 Hz          |
| SCANS | 8                   |
| ACQTM | 2.2295 sec          |
| PD    | 6.0000 sec          |
| PW1   | 5.17 usec           |
| IRNUC | 1H                  |
| CTEMP | 20.8 c              |
| SLVNT | CDCL3               |
| EXREF | 7.26 ppm            |
| BF    | 0.12 Hz             |
| RGAIN | 38                  |

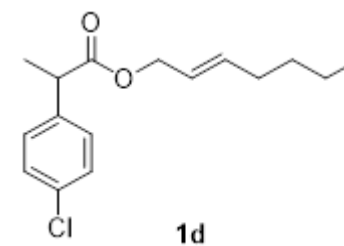

C:\Users\alice\Desktop\ChenSM\1d\_carbon.als

DFILE 1d\_carbon.als  
 COMNT  
 DATIM 14-08-2019 02:20:11  
 OBNUC <sup>13</sup>C  
 EXMOD carbon.jpg  
 OBFRQ 98.52 MHz  
 OBSET 4.64 KHz  
 OBFIN 8.74 Hz  
 POINT 26214  
 FREQU 24630.54 Hz  
 SCANS 109  
 ACQTM 1.0643 sec  
 PD 2.0000 sec  
 PW1 3.12 usec  
 IRNUC <sup>1</sup>H  
 CTEMP 21.0 c  
 SLVNT CDCL<sub>3</sub>  
 EXREF 77.00 ppm  
 BF 0.12 Hz  
 RGAIN 60

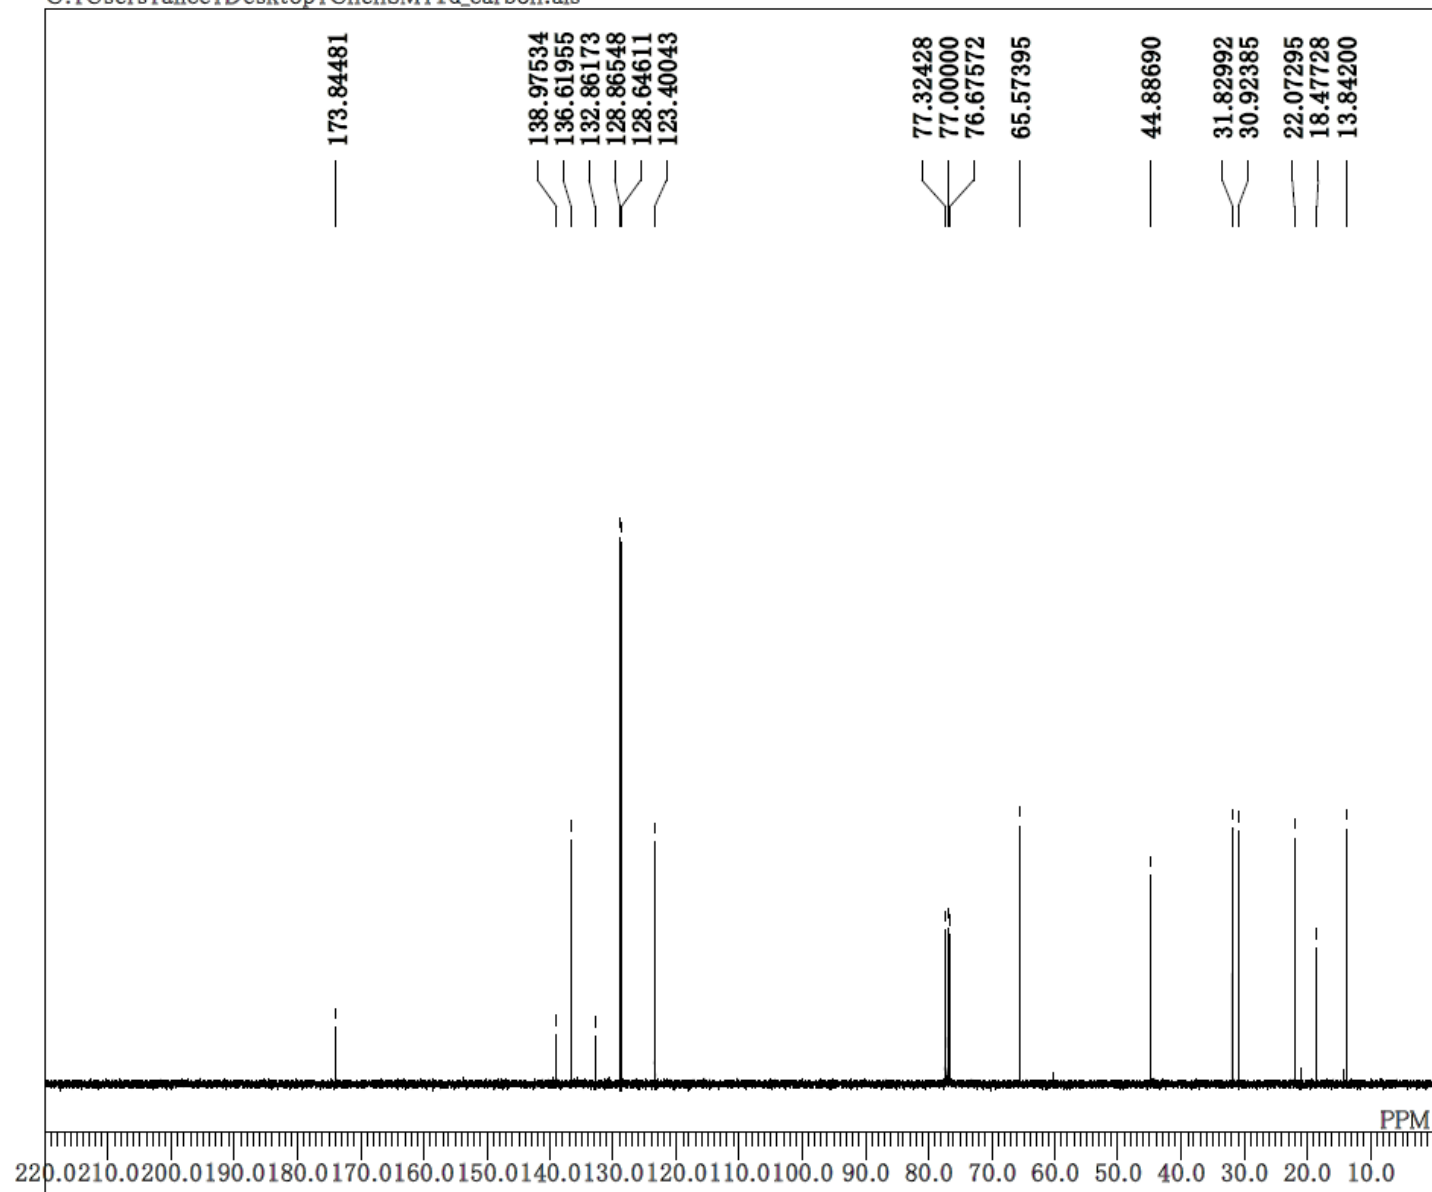

C:\Users\valice\Desktop\ChenSM\1e\_proton.als

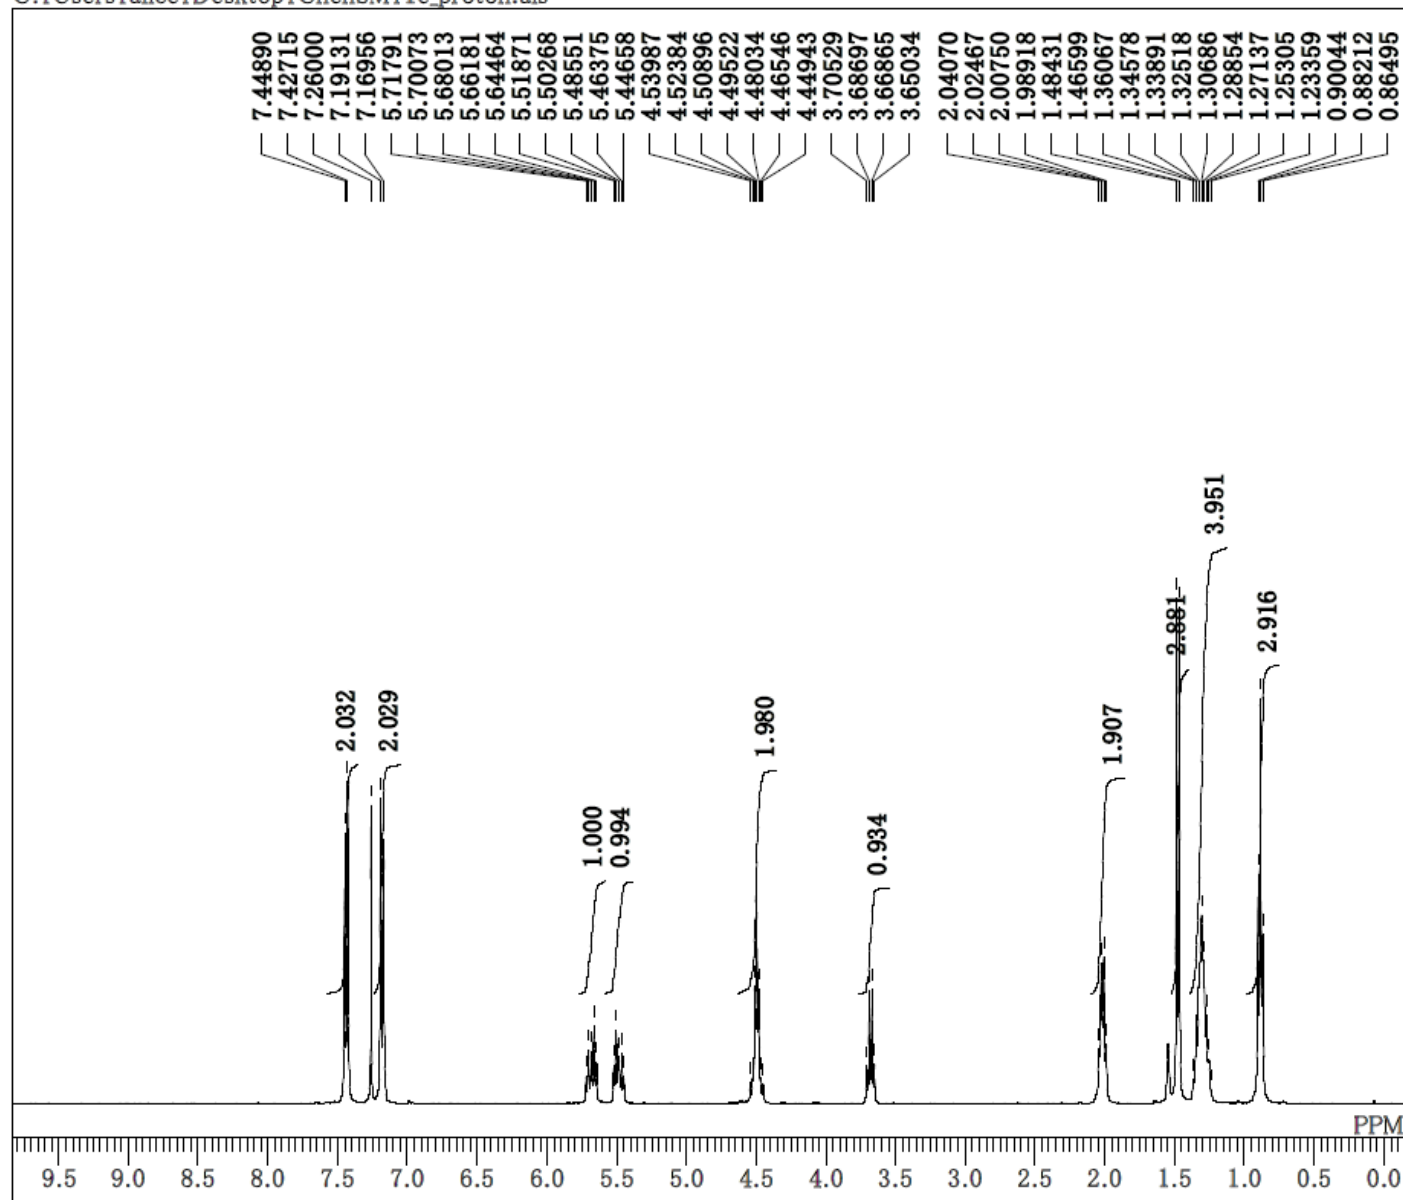

DFILE 1e\_proton.als  
COMNT  
DATIM 13-11-2019 14:55:15  
OBNUC 1H  
EXMOD proton.jxp  
OBFRQ 391.78 MHz  
OBSET 8.51 KHz  
OBFIN 3.34 Hz  
POINT 13107  
FREQU 5878.90 Hz  
SCANS 8  
ACQTM 2.2295 sec  
PD 6.0000 sec  
PW1 5.17 usec  
IRNUC 1H  
CTEMP 20.8 c  
SLVNT CDCL3  
EXREF 7.26 ppm  
BF 1.20 Hz  
RGAIN 46

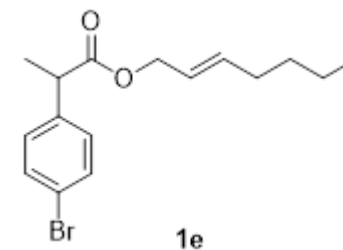

C:\Users\alice\Desktop\ChenSM\1e\_carbon.als

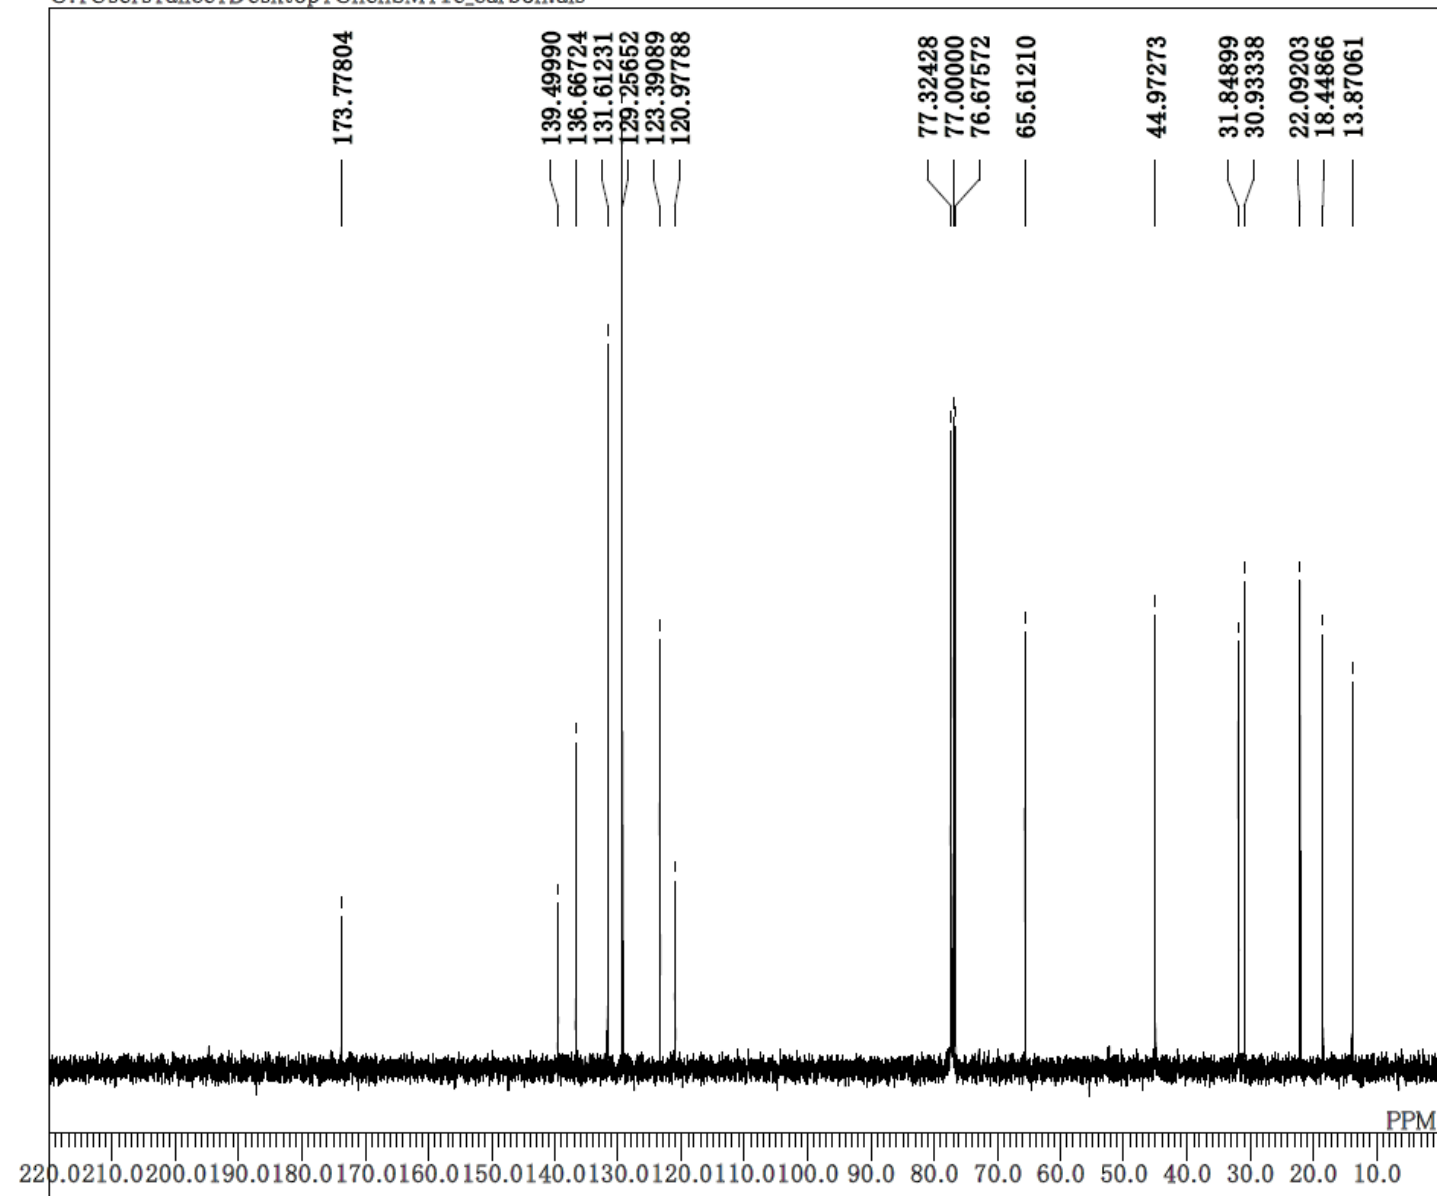

DFILE 1e\_carbon.als  
 COMNT  
 DATIM 13-11-2019 15:08:43  
 OBNUC 13C  
 EXMOD carbon.jxp  
 OBFRQ 98.52 MHz  
 OBSET 4.64 KHz  
 OBFIN 8.74 Hz  
 POINT 26214  
 FREQU 24630.54 Hz  
 SCANS 64  
 ACQTM 1.0643 sec  
 PD 2.0000 sec  
 PW1 3.12 usec  
 IRNUC 1H  
 CTEMP 20.9 c  
 SLVNT CDCL3  
 EXREF 77.00 ppm  
 BF 1.20 Hz  
 RGAIN 60

C:\Users\alice\Desktop\ChenSM\1f\_proton.als

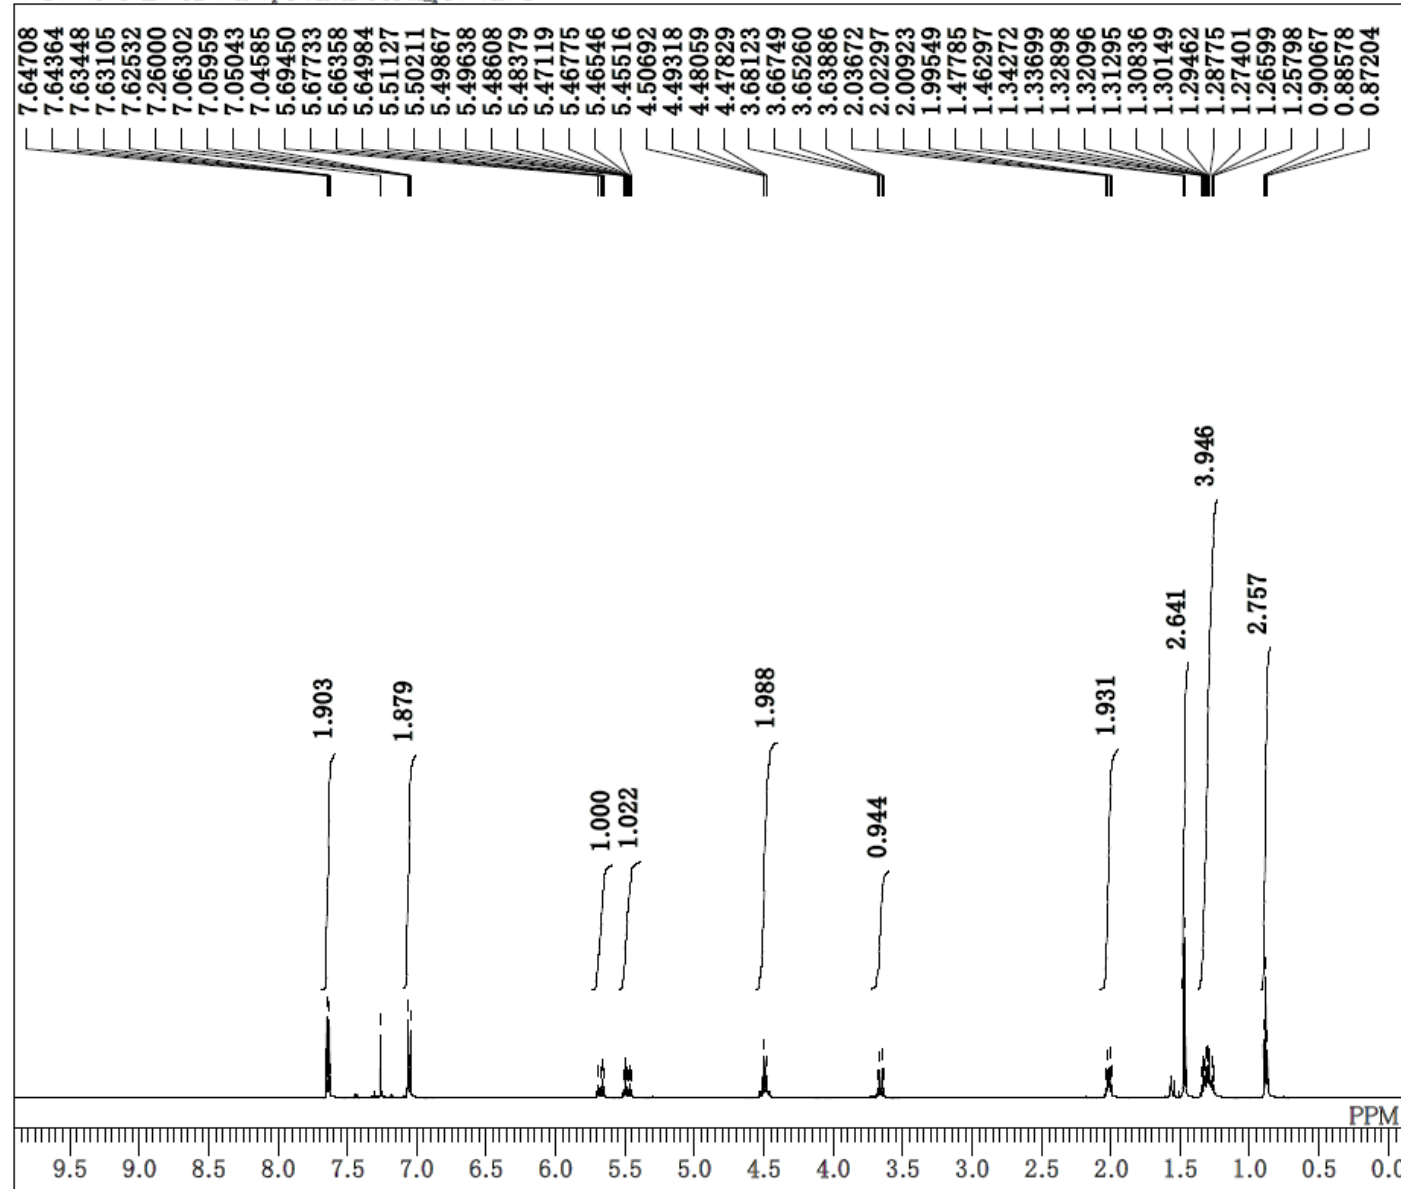

DFILE 1f\_proton.als  
 COMNT 2019-11-19 23:34:03  
 DATIM 1H  
 OBNUC proton.jpg  
 EXMOD 500.16 MHz  
 OBFRQ 2.41 KHz  
 OBSET 6.01 Hz  
 OBFIN 13107  
 POINT 7507.51 Hz  
 FREQU 8  
 SCANS 1.7459 sec  
 ACQTM 6.0000 sec  
 PD 5.55 usec  
 PW1 1H  
 IRNUC 21.5 c  
 CTEMP CDCL3  
 SLVNT 7.26 ppm  
 EXREF 0.12 Hz  
 BF 42  
 RGAIN

C:\Users\Valice\Desktop\ChenSM\1f\_carbon.als

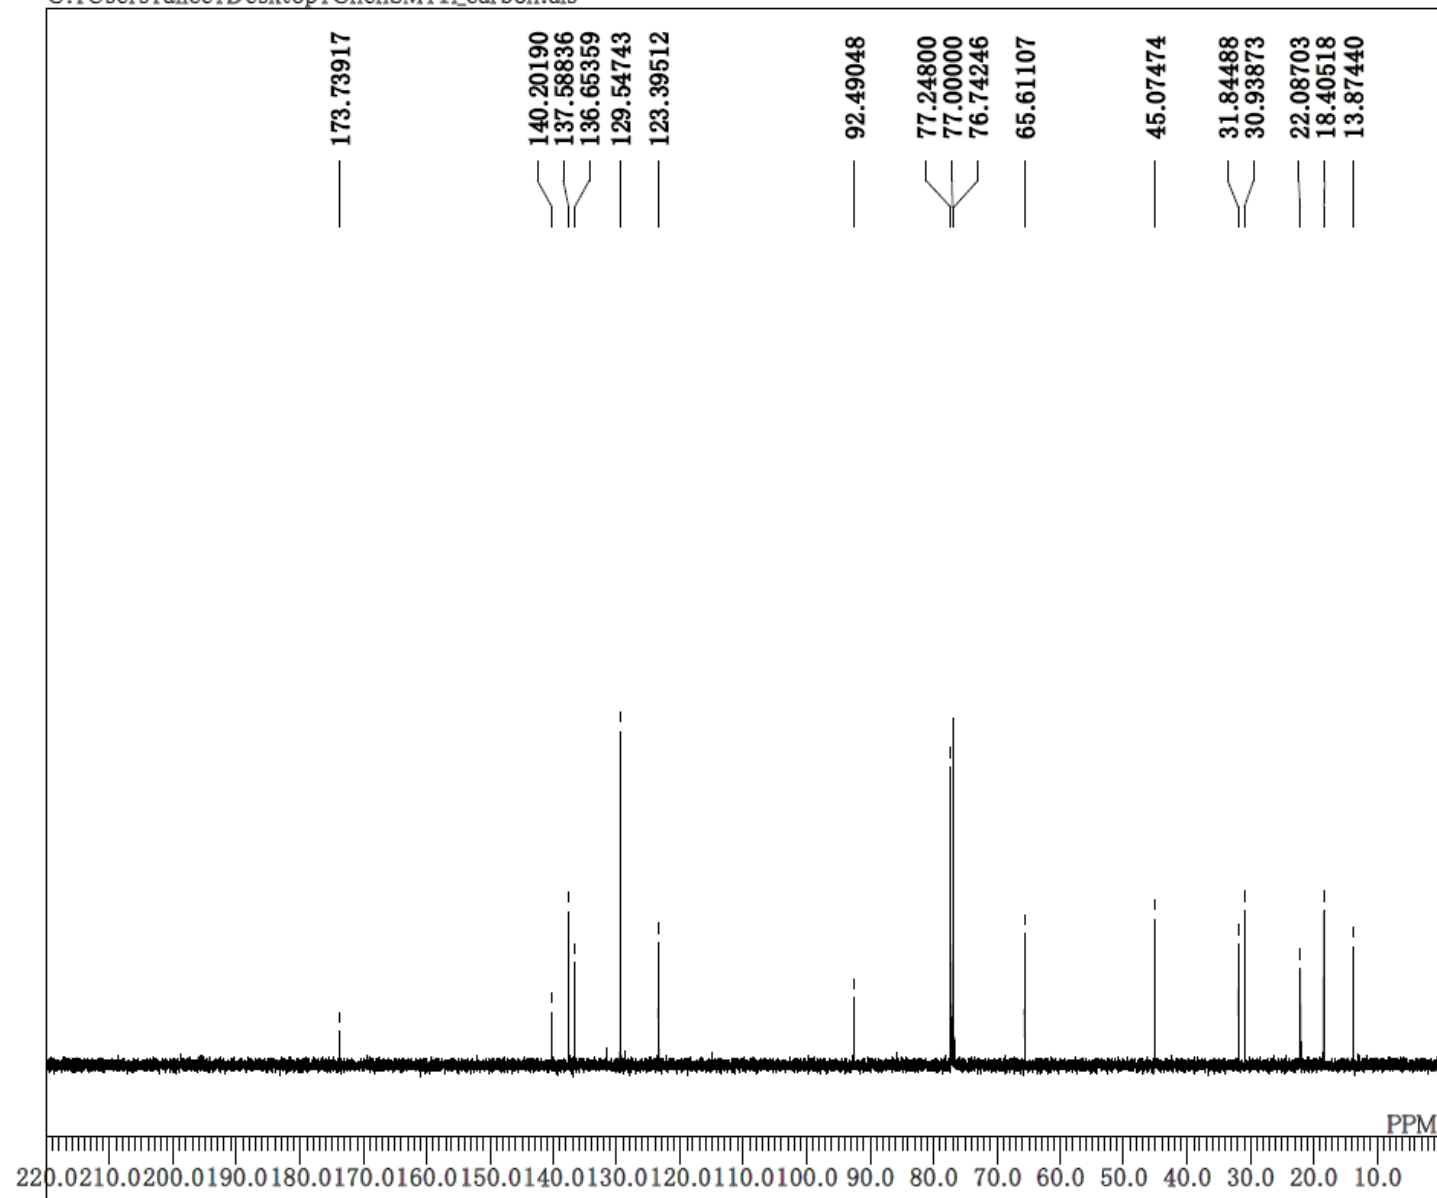

DFILE 1f\_carbon.als  
 COMNT  
 DATIM 2019-11-19 23:47:31  
 OBNUC 13C  
 EXMOD carbon.jpg  
 OBFRQ 125.77 MHz  
 OBSET 7.87 KHz  
 OBFIN 4.21 Hz  
 POINT 26214  
 FREQU 31446.54 Hz  
 SCANS 66  
 ACQTM 0.8336 sec  
 PD 2.0000 sec  
 PW1 3.40 usec  
 IRNUC 1H  
 CTEMP 21.9 c  
 SLVNT CDCL3  
 EXREF 77.00 ppm  
 BF 0.12 Hz  
 RGAIN 60



C:\Users\alice\Desktop\ChenSM\1g\_proton.als

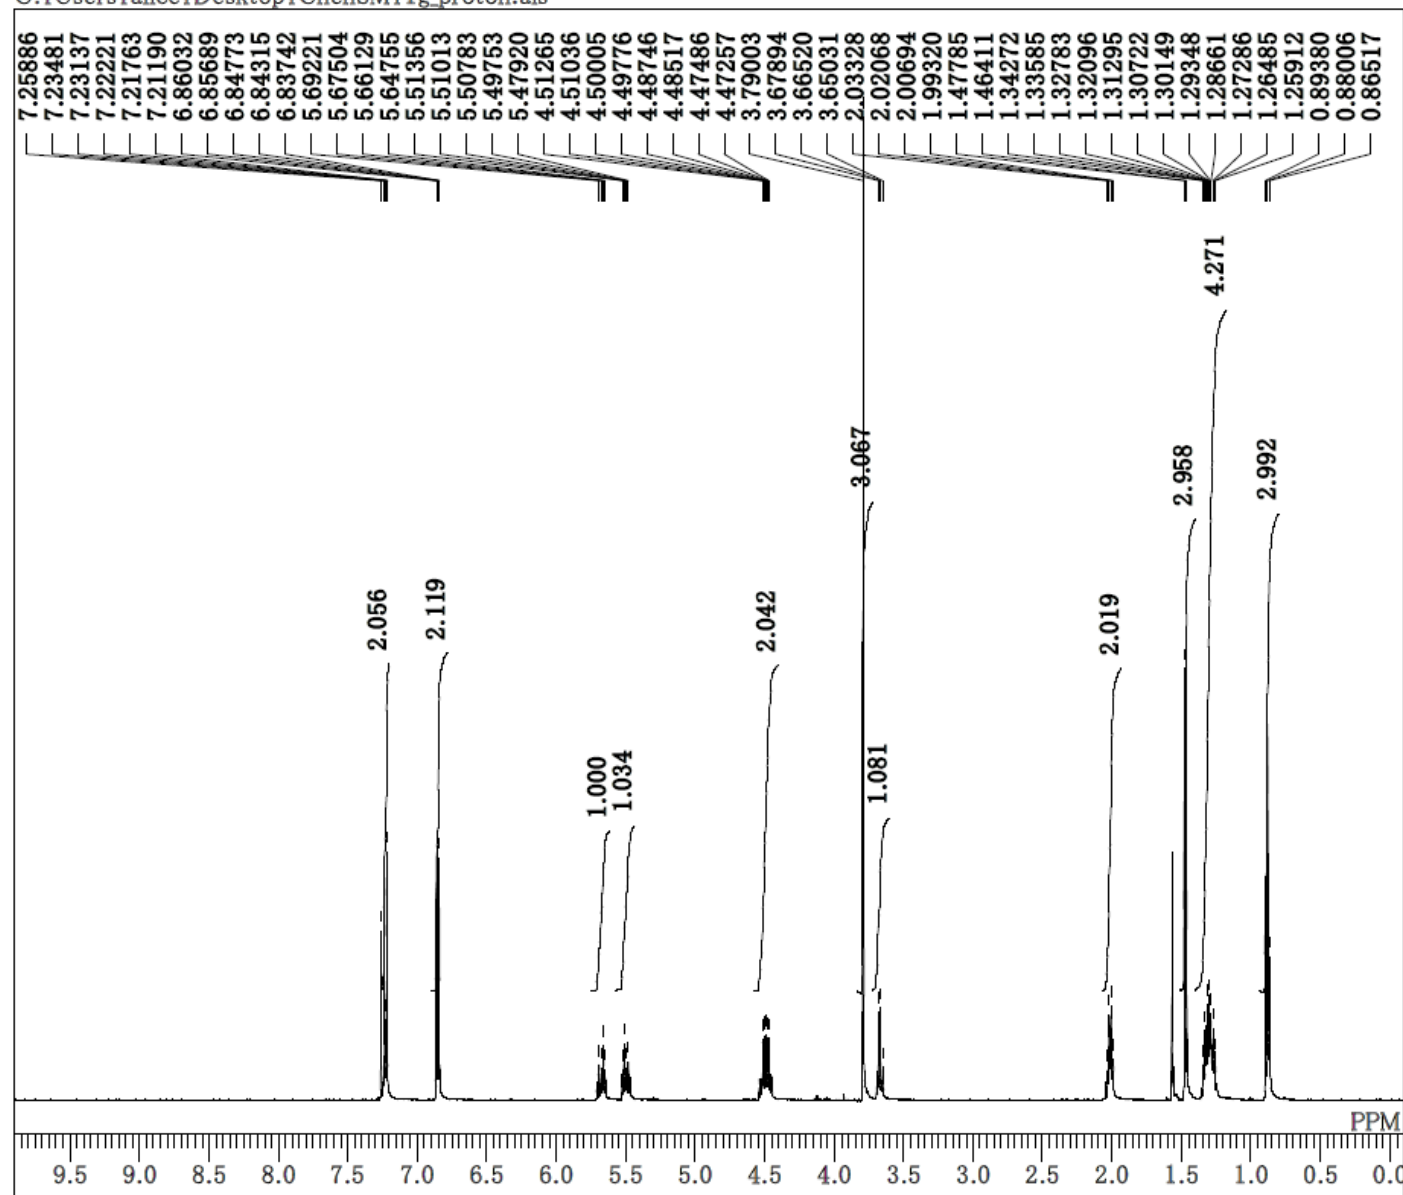

DFILE 1g\_proton.als  
 COMNT  
 DATIM 2019-07-06 20:08:14  
 OBNUC 1H  
 EXMOD proton.jxp  
 OBFRQ 500.16 MHz  
 OBSET 2.41 KHz  
 OBFIN 6.01 Hz  
 POINT 13107  
 FREQU 7507.51 Hz  
 SCANS 8  
 ACQTM 1.7459 sec  
 PD 6.0000 sec  
 PW1 5.55 usec  
 IRNUC 1H  
 CTEMP 21.6 c  
 SLVNT CDCL3  
 EXREF 7.26 ppm  
 BF 0.12 Hz  
 RGAIN 38

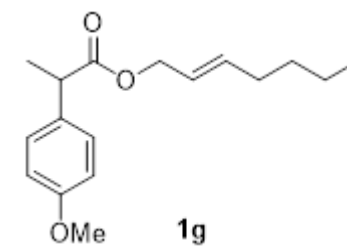

C:\Users\alice\Desktop\ChenSM\1g\_carbon.als

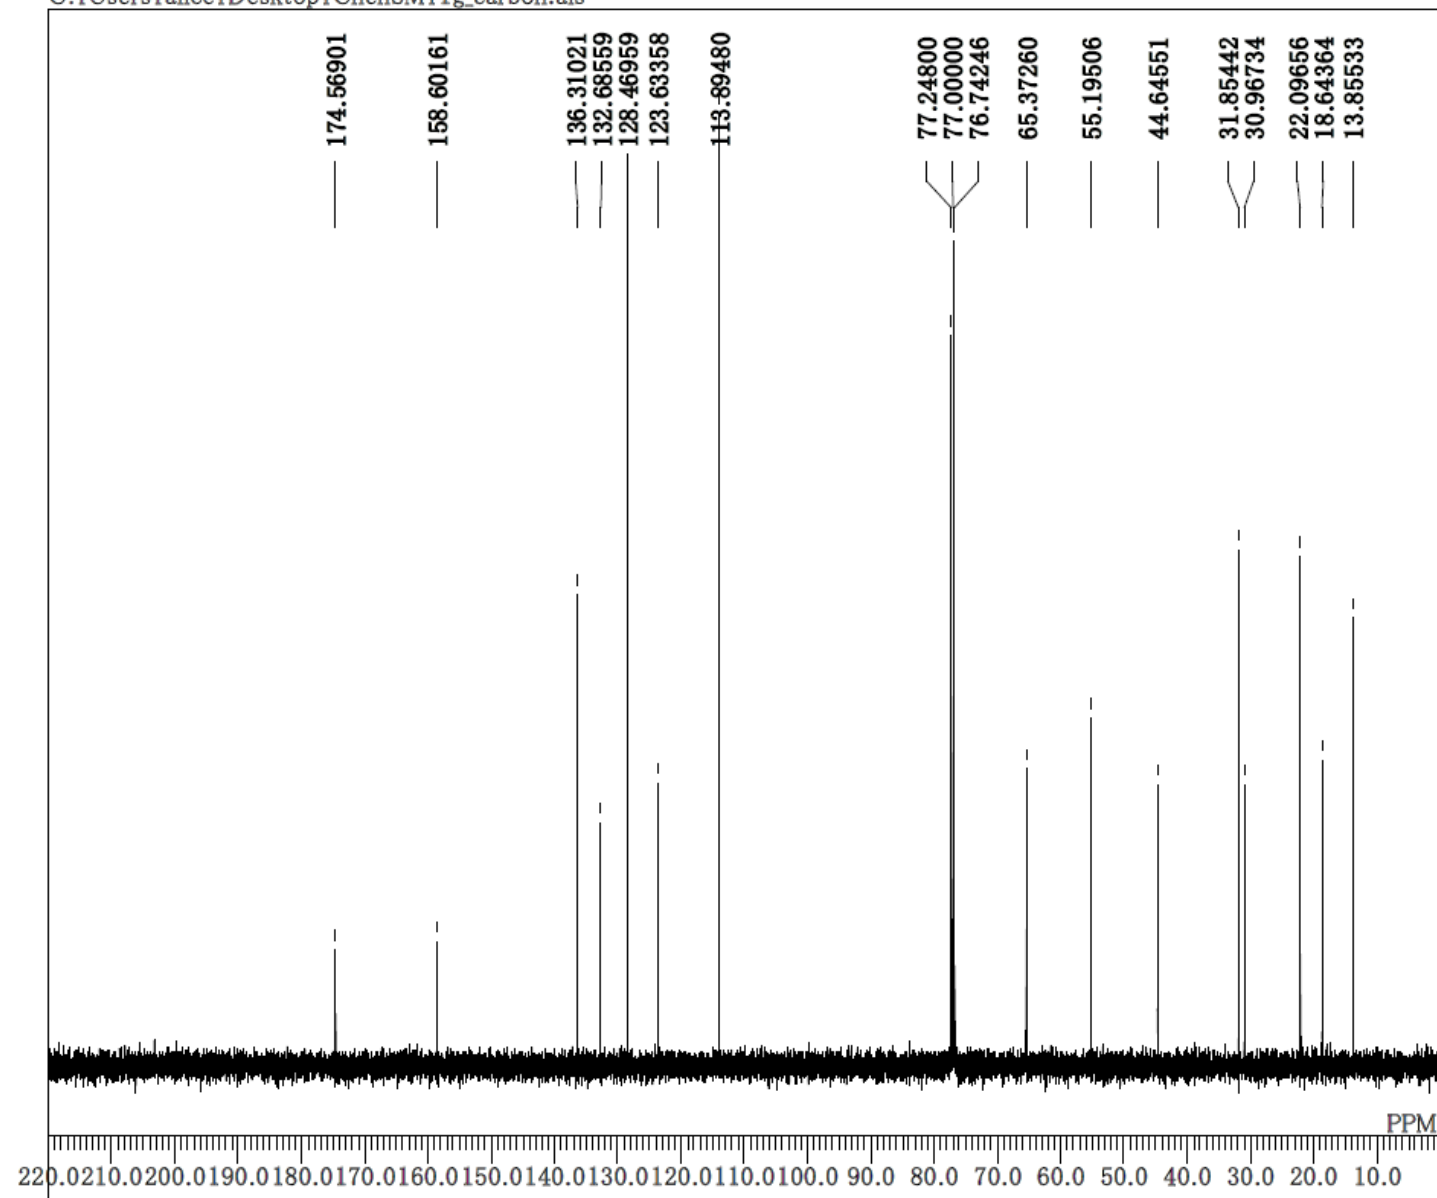

DFILE 1g\_carbon.als  
 COMNT  
 DATIM 2019-07-06 20:33:27  
 OBNUC 13C  
 EXMOD carbon.jpg  
 OBFRQ 125.77 MHz  
 OBSET 7.87 KHz  
 OBFIN 4.21 Hz  
 POINT 26214  
 FREQU 31446.54 Hz  
 SCANS 101  
 ACQTM 0.8336 sec  
 PD 2.0000 sec  
 PW1 3.40 usec  
 IRNUC 1H  
 CTEMP 22.1 c  
 SLVNT CDCL3  
 EXREF 77.00 ppm  
 BF 0.12 Hz  
 RGAIN 60

C:\Users\valice\Desktop\ChenSM\1h\_proton.als

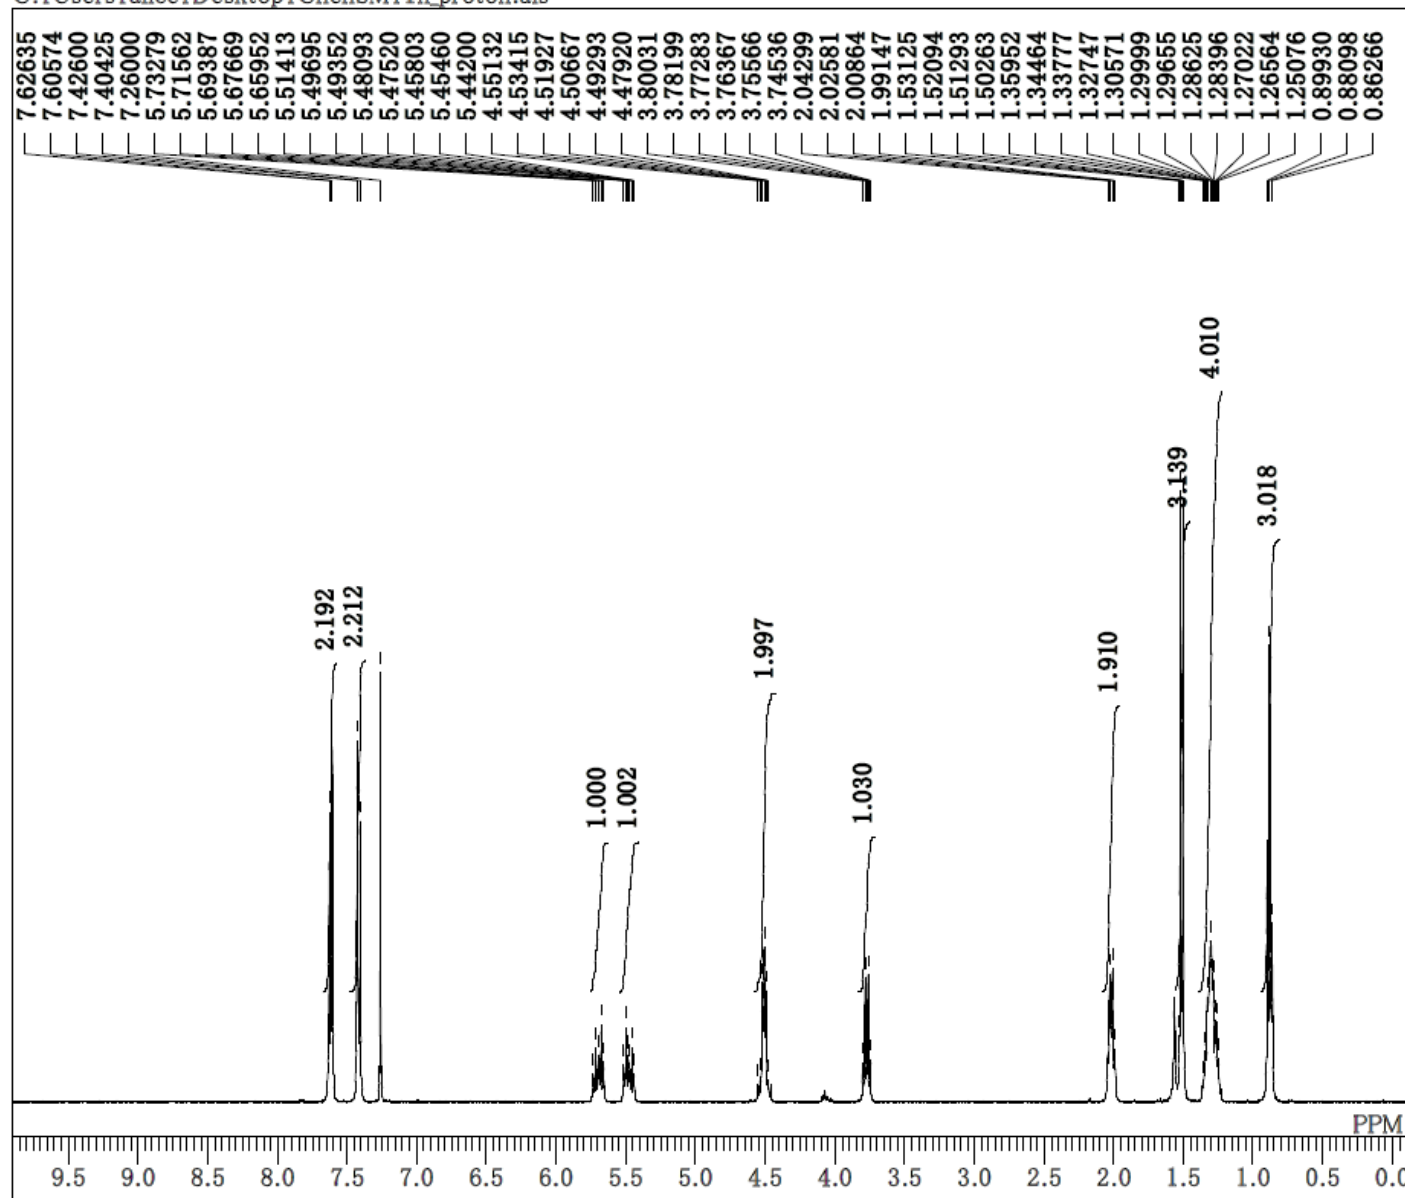

DFILE 1h\_proton.als  
 COMNT  
 DATIM 09-11-2019 21:12:19  
 OBNUC 1H  
 EXMOD proton.jxp  
 OBFRQ 391.78 MHz  
 OBSET 8.51 KHz  
 OBFIN 3.34 Hz  
 POINT 13107  
 FREQU 5878.90 Hz  
 SCANS 8  
 ACQTM 2.2295 sec  
 PD 6.0000 sec  
 PW1 5.17 usec  
 IRNUC 1H  
 CTEMP 20.6 c  
 SLVNT CDCL3  
 EXREF 7.26 ppm  
 BF 0.12 Hz  
 RGAIN 44

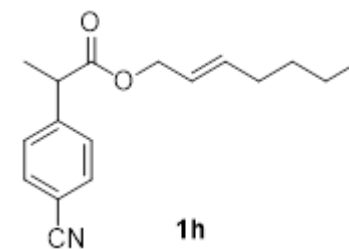

C:\Users\Valice\Desktop\ChenSM\1h\_carbon.als

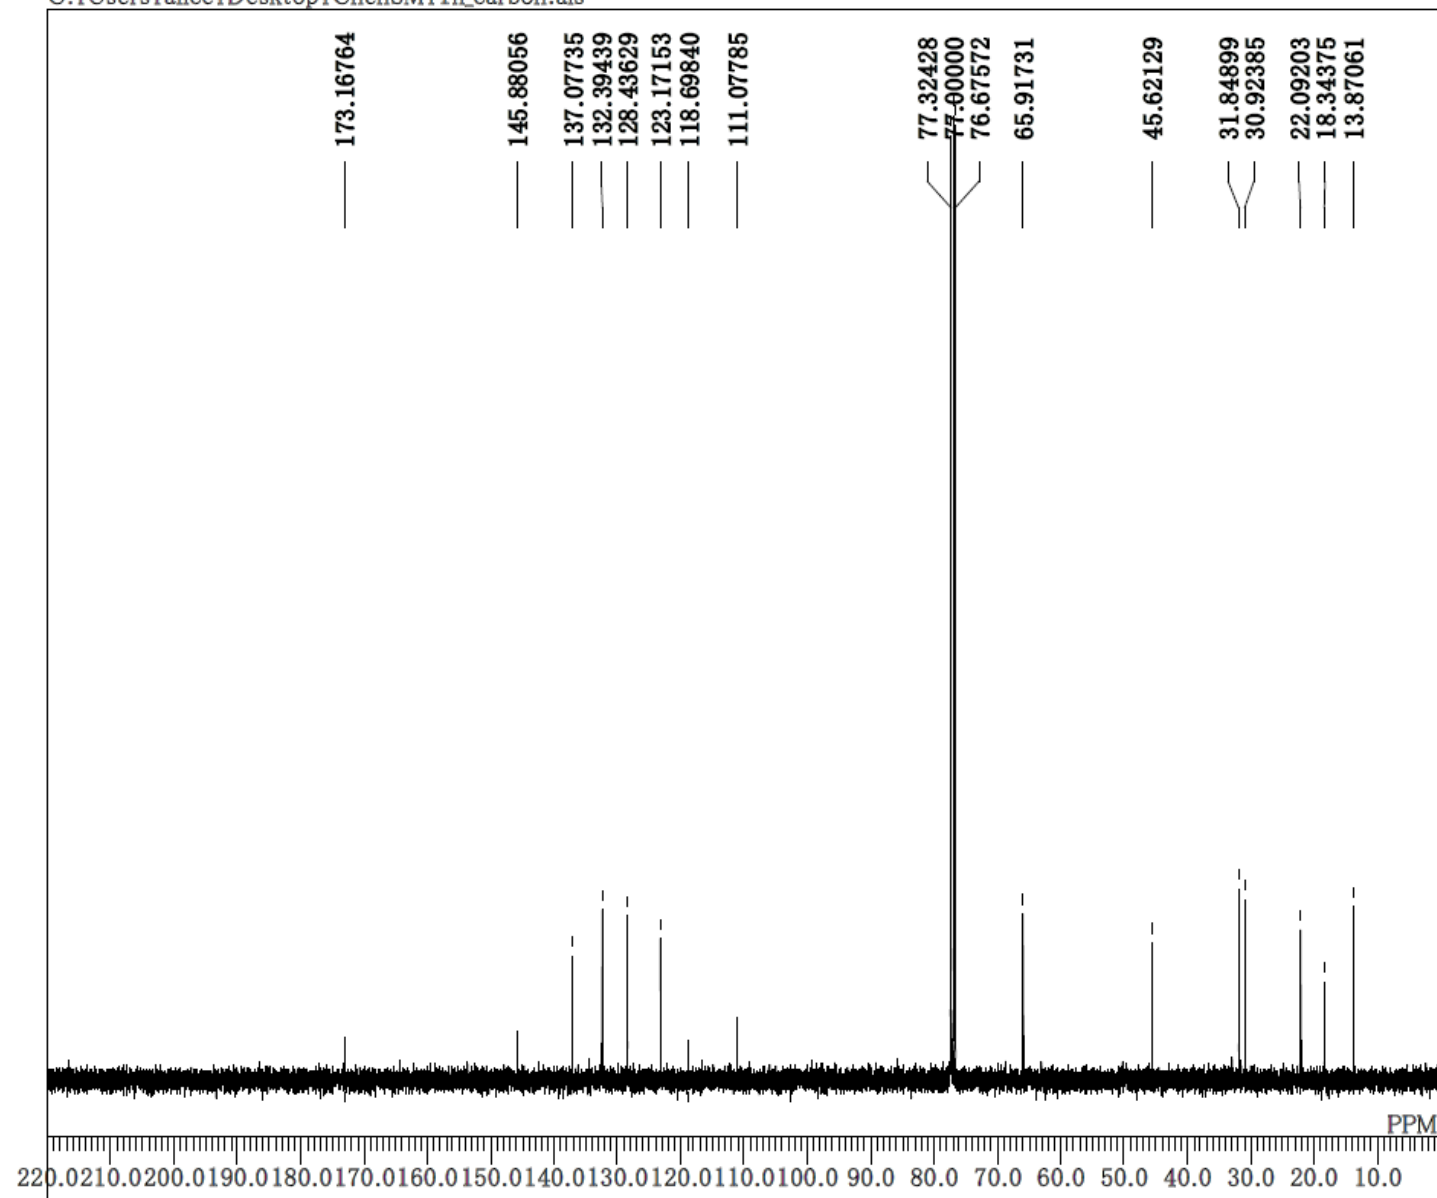

DFILE 1h\_carbon.als  
 COMNT  
 DATIM 09-11-2019 21:25:32  
 OBNUC 13C  
 EXMOD carbon.jpg  
 OBFRQ 98.52 MHz  
 OBSET 4.64 KHz  
 OBFIN 8.74 Hz  
 POINT 26214  
 FREQU 24630.54 Hz  
 SCANS 350  
 ACQTM 1.0643 sec  
 PD 2.0000 sec  
 PW1 3.12 usec  
 IRNUC 1H  
 CTEMP 20.7 c  
 SLVNT CDCL3  
 EXREF 77.00 ppm  
 BF 0.12 Hz  
 RGAIN 60

C:\Users\valice\Desktop\ChenSM\1i\_proton.als

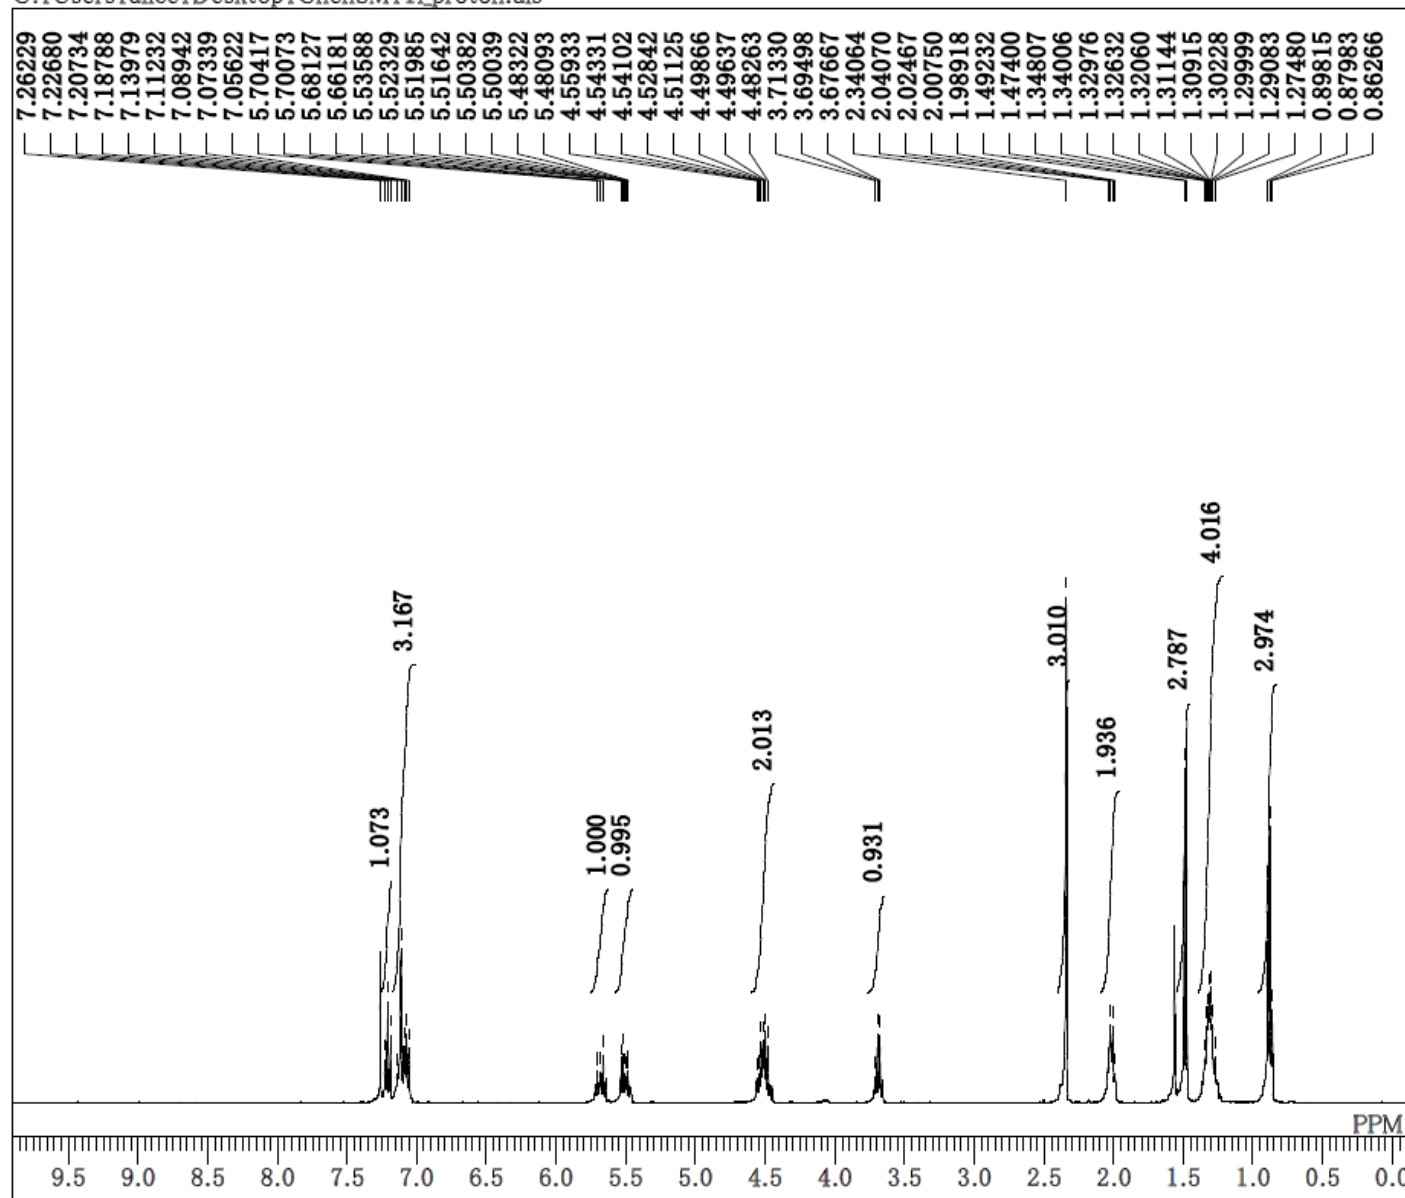

DFILE li\_proton.als  
 COMNT  
 DATIM 20-09-2019 14:52:13  
 OBNUC 1H  
 EXMOD proton.jxp  
 OBFRQ 391.78 MHz  
 OBSET 8.51 KHz  
 OBFIN 3.34 Hz  
 POINT 13107  
 FREQU 5878.90 Hz  
 SCANS 8  
 ACQTM 2.2295 sec  
 PD 6.0000 sec  
 PW1 5.17 usec  
 IRNUC 1H  
 CTEMP 20.8 c  
 SLVNT CDCL3  
 EXREF 7.26 ppm  
 BF 0.12 Hz  
 RGAIN 40

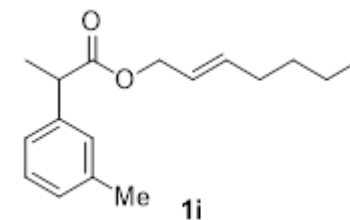

C:\Users\Valice\Desktop\ChenSM\1i\_carbon.als

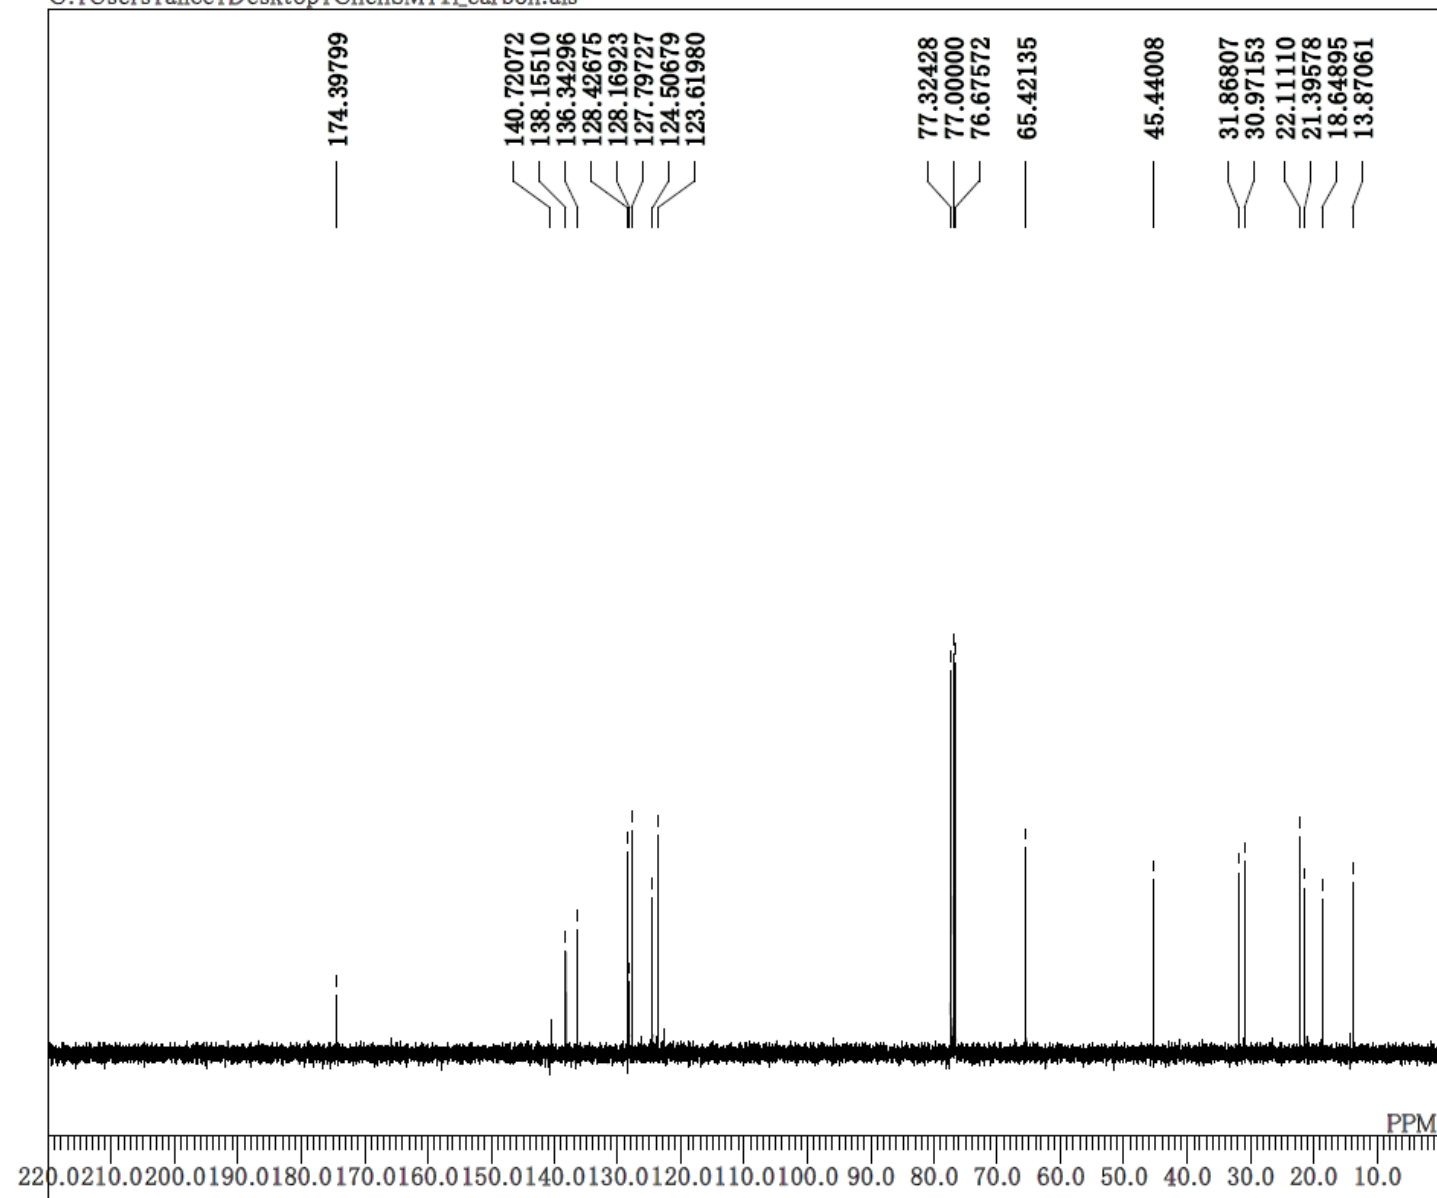

|       |                     |
|-------|---------------------|
| DFILE | 1i_carbon.als       |
| COMNT |                     |
| DATIM | 20-09-2019 19:49:17 |
| OBNUC | 13C                 |
| EXMOD | carbon.jpg          |
| OBFRQ | 98.52 MHz           |
| OBSET | 4.64 KHz            |
| OBFIN | 8.74 Hz             |
| POINT | 26214               |
| FREQU | 24630.54 Hz         |
| SCANS | 60                  |
| ACQTM | 1.0643 sec          |
| PD    | 2.0000 sec          |
| PW1   | 3.12 usec           |
| IRNUC | 1H                  |
| CTEMP | 21.1 c              |
| SLVNT | CDCL3               |
| EXREF | 77.00 ppm           |
| BF    | 0.12 Hz             |
| RGAIN | 60                  |

C:\Users\valice\Desktop\ChenSM\1j\_proton.als

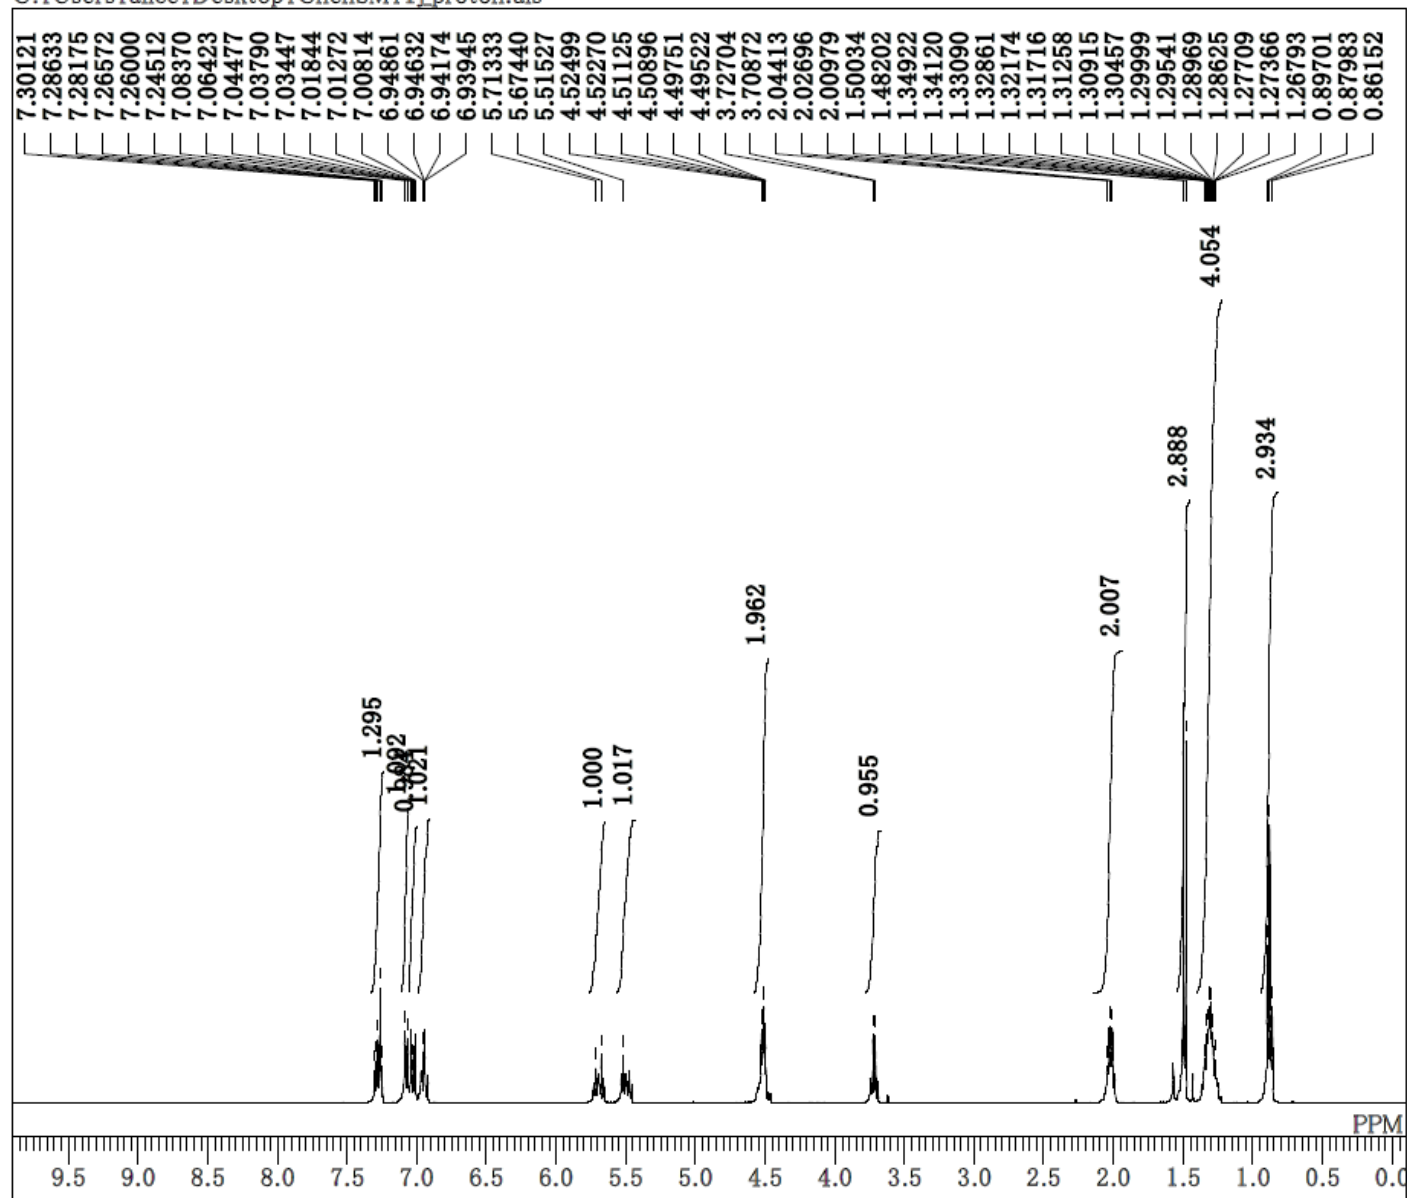

DFILE 1j\_proton.als  
 COMNT  
 DATIM 20-09-2019 14:47:23  
 OBNUC 1H  
 EXMOD proton.jxp  
 OBFRQ 391.78 MHz  
 OBSET 8.51 KHz  
 OBFIN 3.34 Hz  
 POINT 13107  
 FREQU 5878.90 Hz  
 SCANS 8  
 ACQTM 2.2295 sec  
 PD 6.0000 sec  
 PW1 5.17 usec  
 IRNUC 1H  
 CTEMP 20.8 c  
 SLVNT CDCL3  
 EXREF 7.26 ppm  
 BF 0.12 Hz  
 RGAIN 36

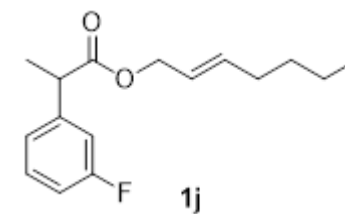

C:\Users\Valice\Desktop\ChenSM\1j\_carbon.als

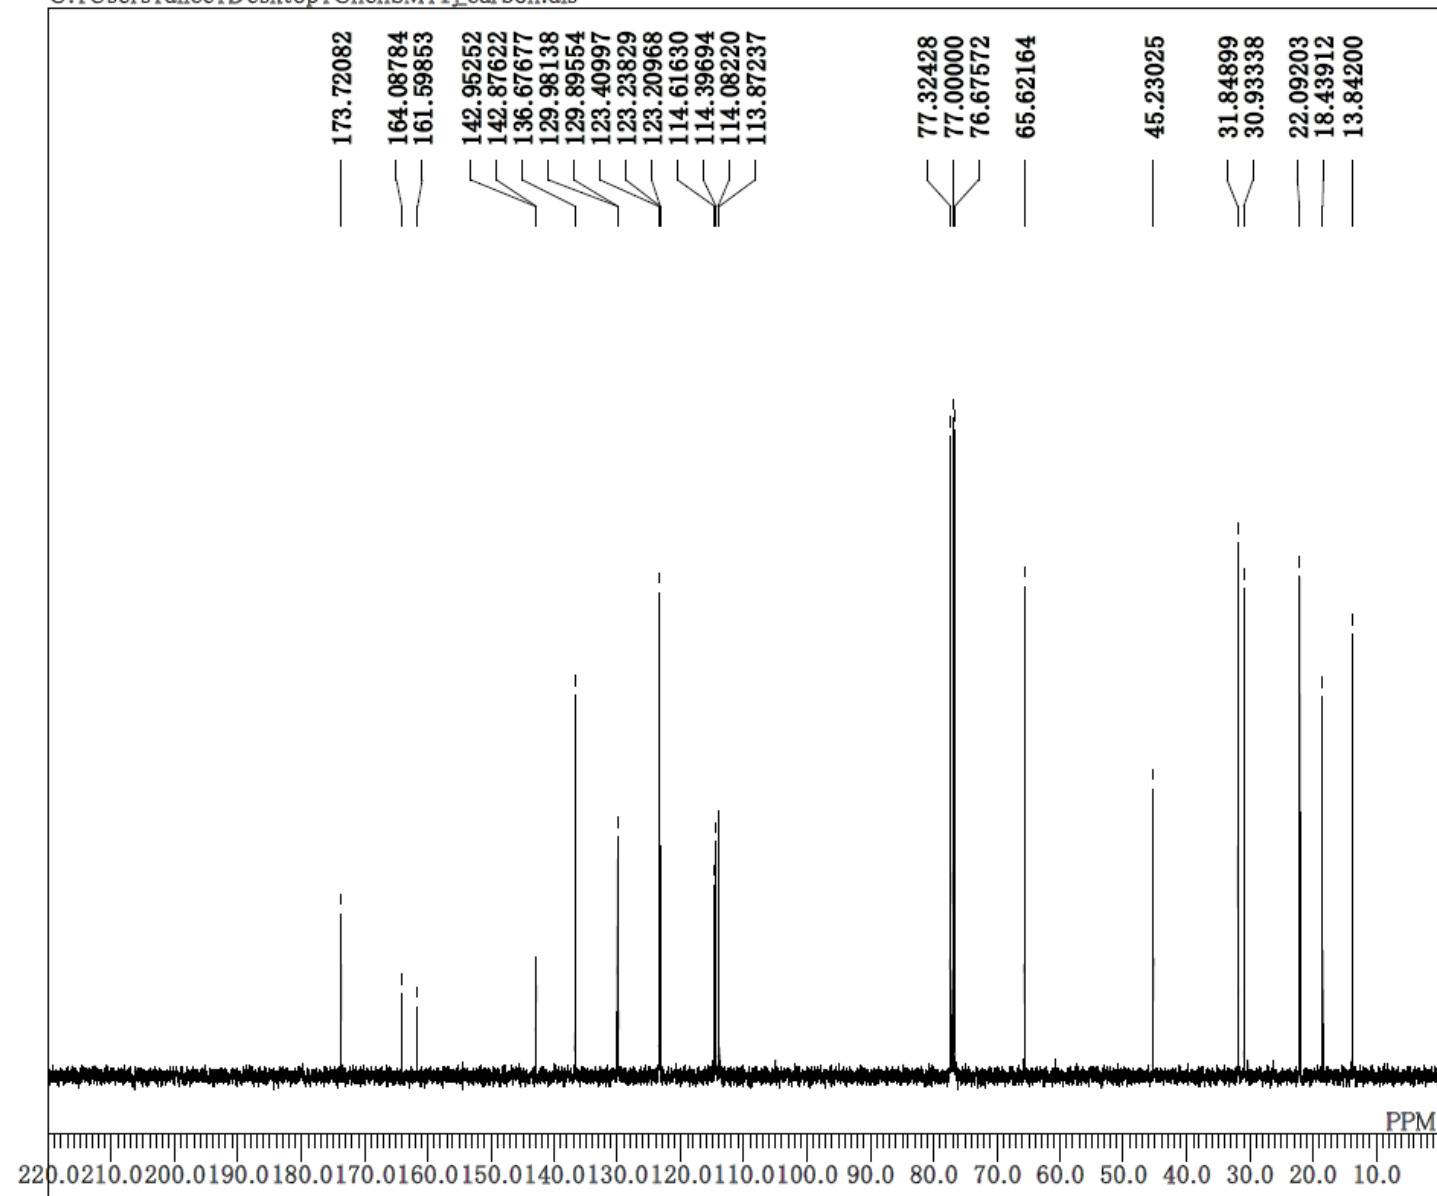

DFILE 1j\_carbon.als  
 COMNT  
 DATIM 20-09-2019 15:30:11  
 OBNUC <sup>13</sup>C  
 EXMOD carbon.jpg  
 OBFRQ 98.52 MHz  
 OBSET 4.64 KHz  
 OBFIN 8.74 Hz  
 POINT 26214  
 FREQU 24630.54 Hz  
 SCANS 104  
 ACQTM 1.0643 sec  
 PD 2.0000 sec  
 PW1 3.12 usec  
 IRNUC <sup>1</sup>H  
 CTEMP 21.2 c  
 SLVNT CDCL<sub>3</sub>  
 EXREF 77.00 ppm  
 BF 1.20 Hz  
 RGAIN 60



C:\Users\Yalice\Desktop\ChenSM\1j.F.als

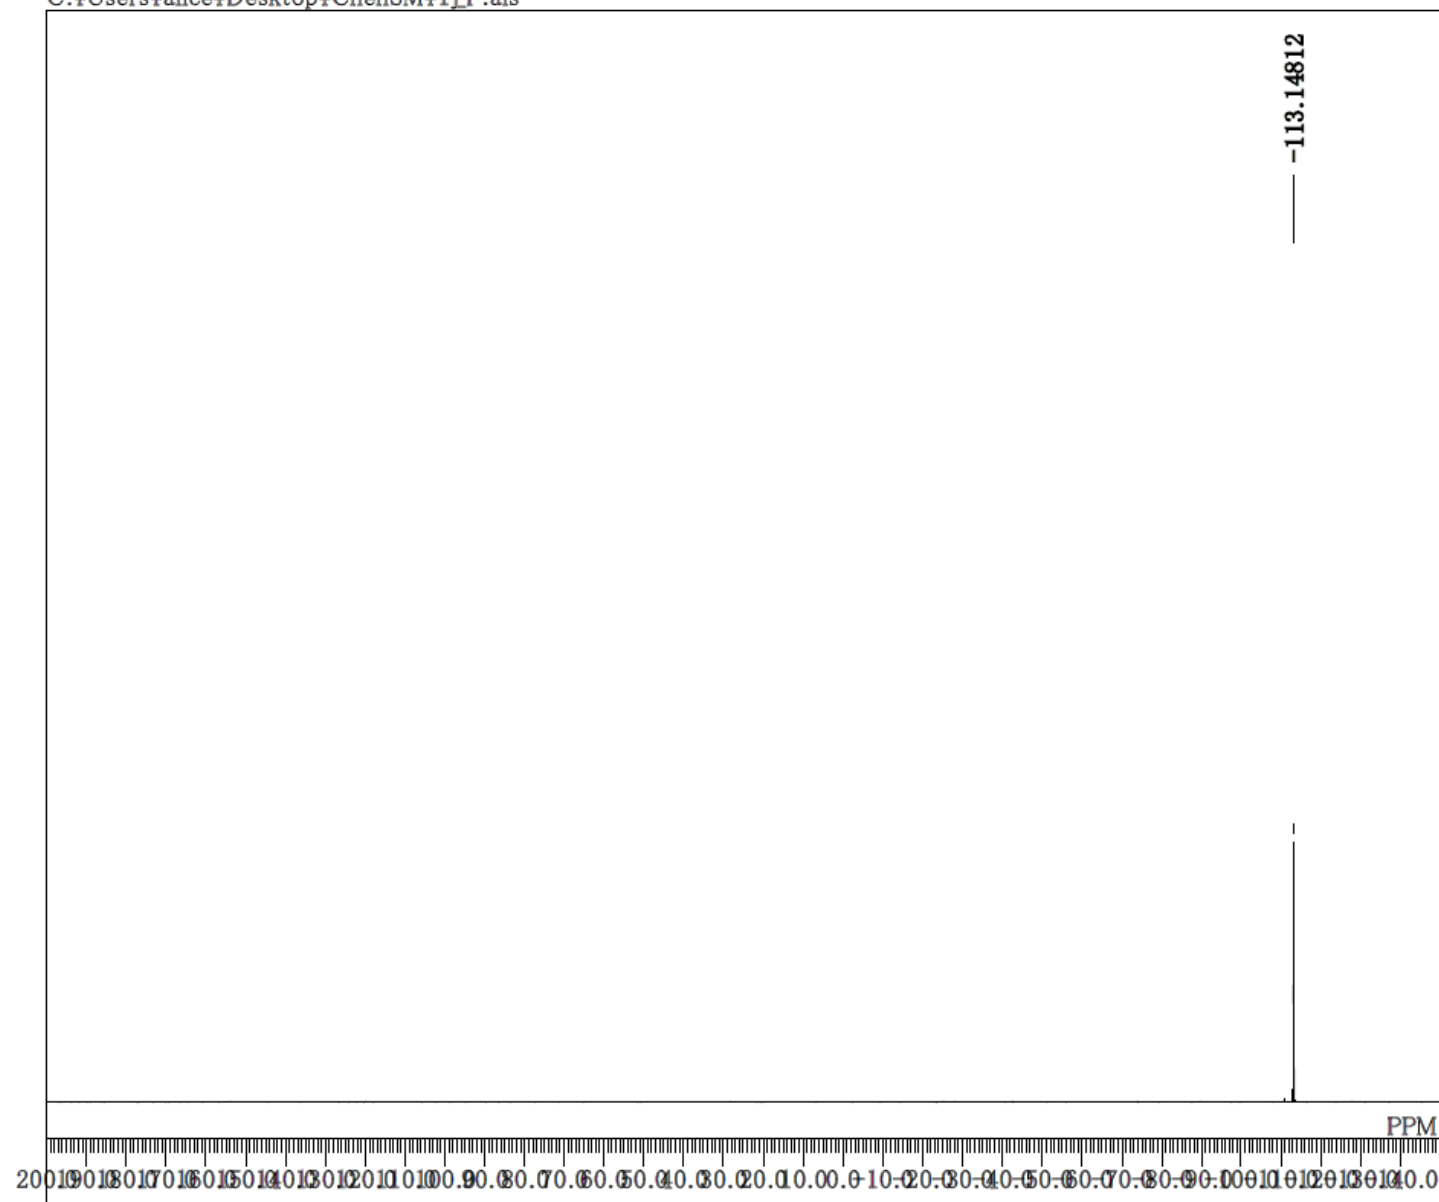

DFILE 1j.F.als  
COMNT  
DATIM 15-06-2020 19:29:28  
OBNUC 19F  
EXMOD proton.jxp  
OBFRQ 368.64 MHz  
OBSET 7.63 KHz  
OBFIN 2.85 Hz  
POINT 13107  
FREQU 149253.73 Hz  
SCANS 16  
ACQTM 0.0878 sec  
PD 6.0000 sec  
PW1 4.10 usec  
IRNUC 19F  
CTEMP 20.9 c  
SLVNT CDCL3  
EXREF 0.00 ppm  
BF 1.00 Hz  
RGAIN 50

C:\Users\alice\Desktop\ChenSM\1k\_proton.als

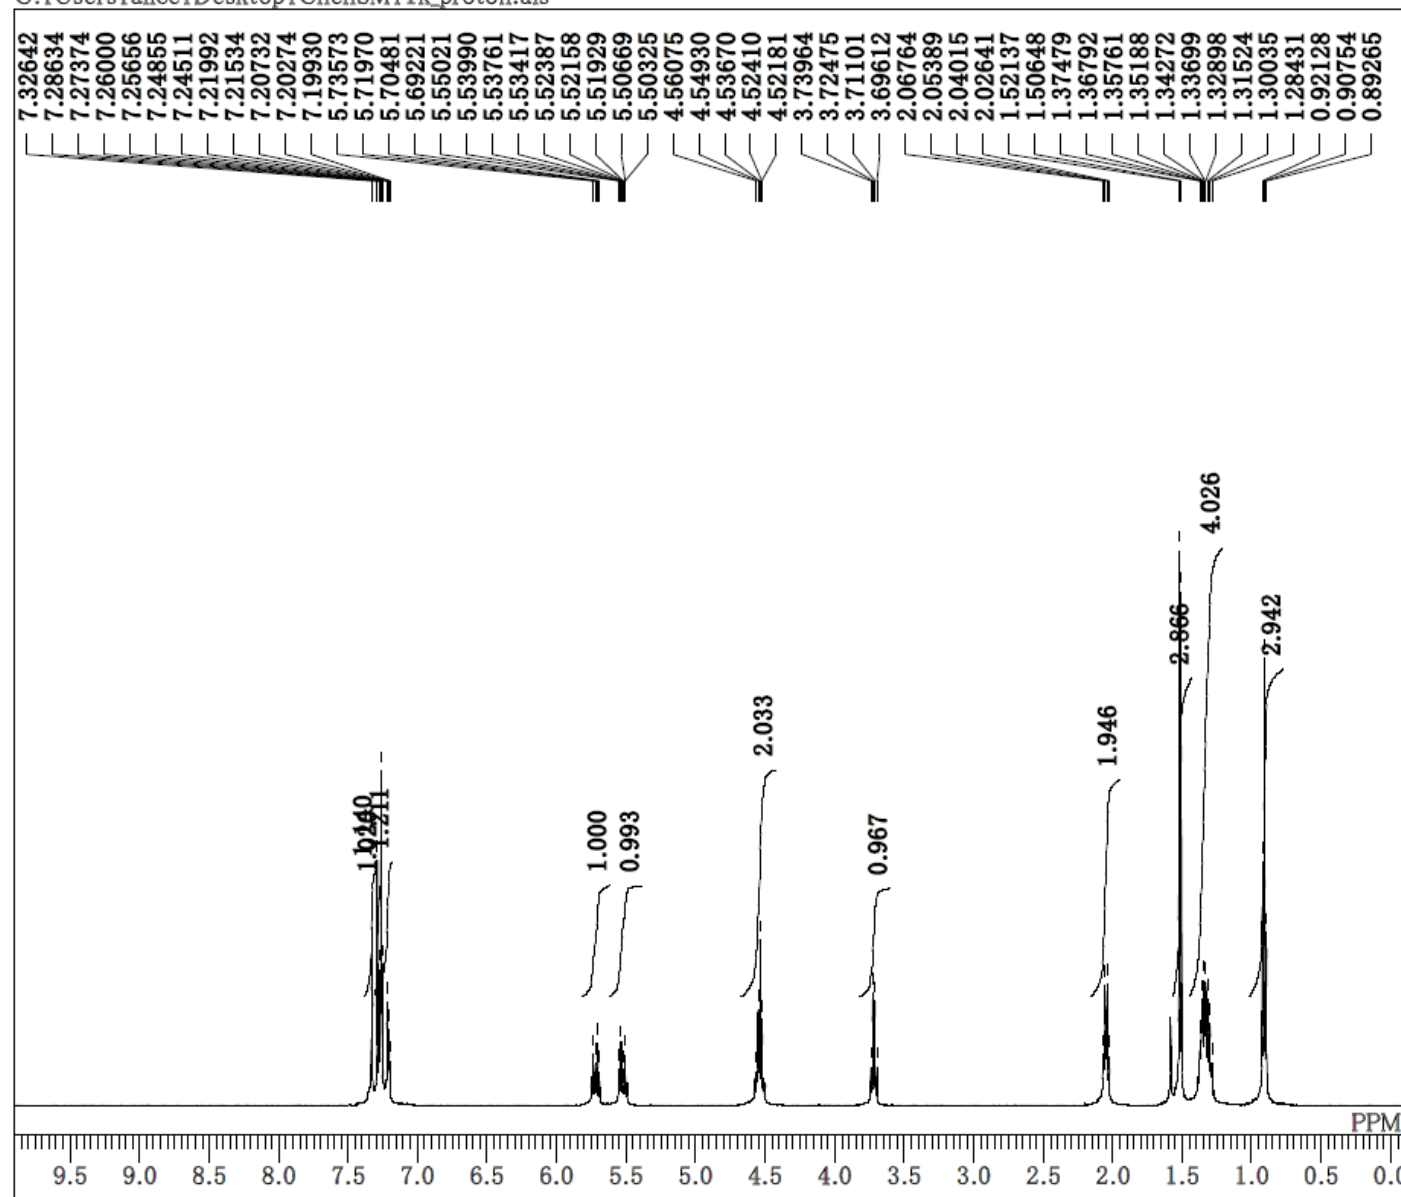

DFILE 1k\_proton.als  
 COMNT  
 DATIM 2019-08-09 13:37:28  
 OBNUC 1H  
 EXMOD proton.jxp  
 OBFRQ 500.16 MHz  
 OBSET 2.41 KHz  
 OBFIN 6.01 Hz  
 POINT 13107  
 FREQU 7507.51 Hz  
 SCANS 8  
 ACQTM 1.7459 sec  
 PD 6.0000 sec  
 PW1 5.55 usec  
 IRNUC 1H  
 CTEMP 21.7 c  
 SLVNT CDCL3  
 EXREF 7.26 ppm  
 BF 0.12 Hz  
 RGAIN 38

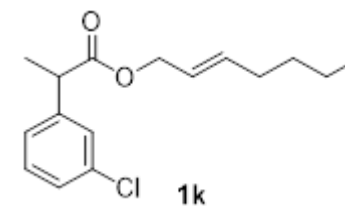

C:\Users\alice\Desktop\ChenSM\1k\_carbon.als

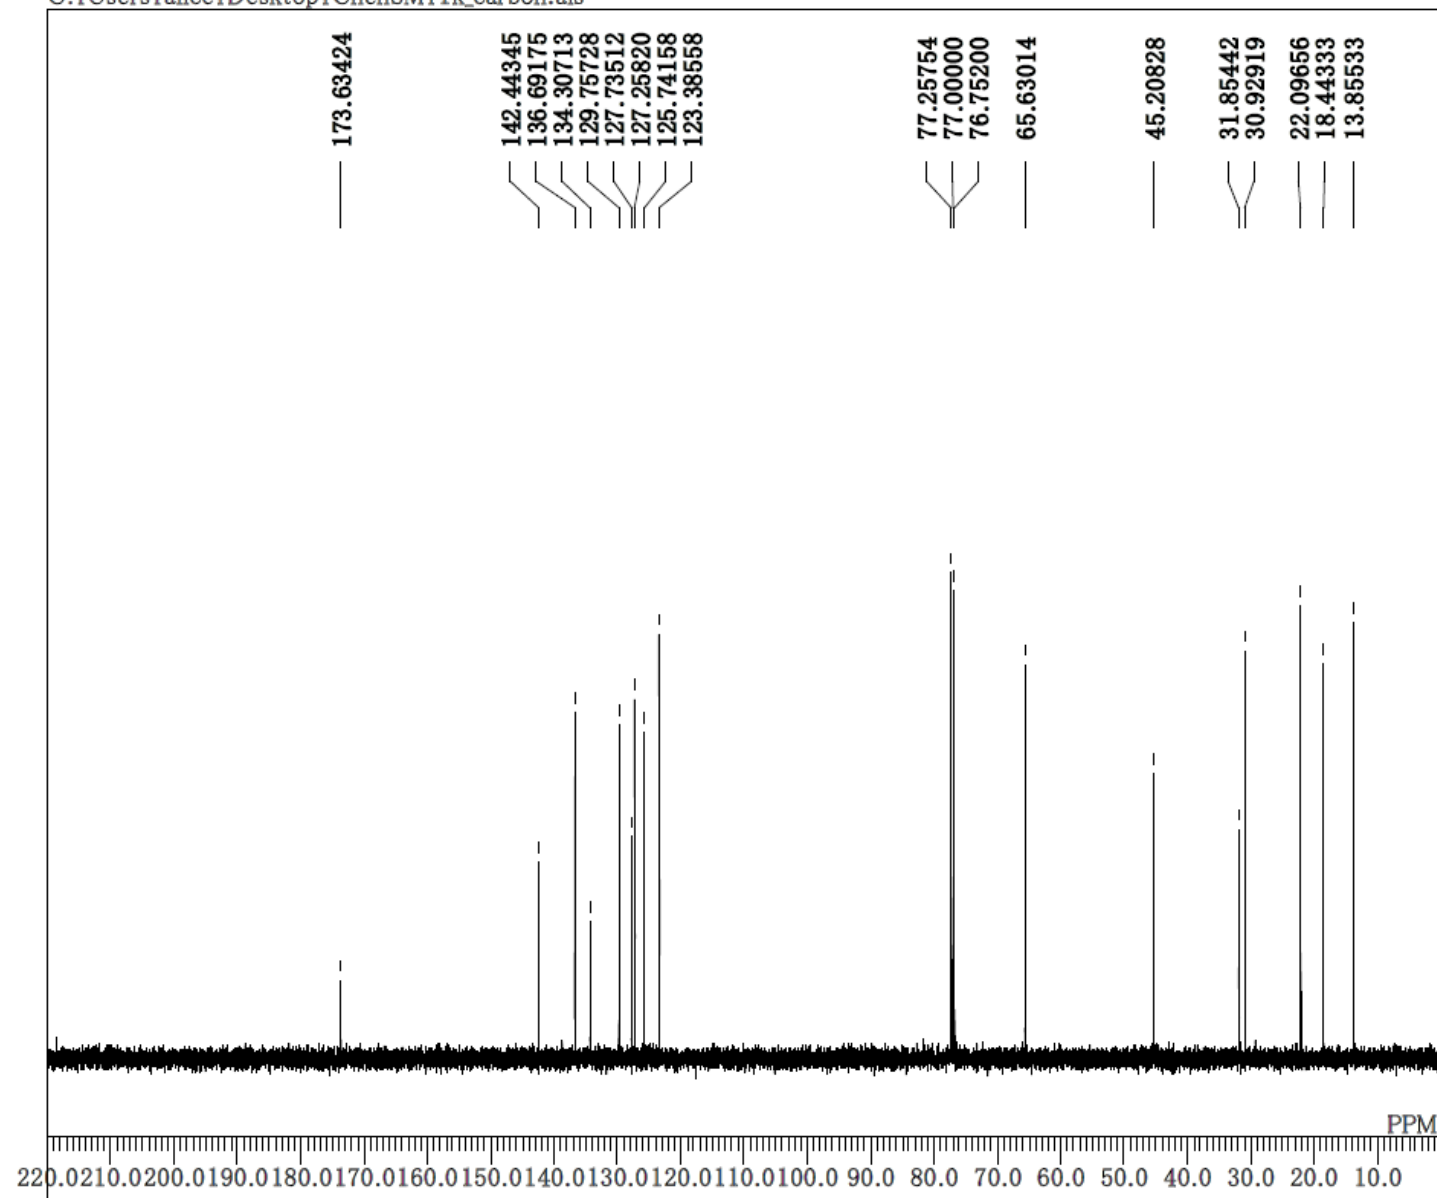

DFILE 1k\_carbon.als  
 COMNT  
 DATIM 2019-08-09 13:41:47  
 OBNUC 13C  
 EXMOD carbon.jxp  
 OBFRQ 125.77 MHz  
 OBSET 7.87 KHz  
 OBFIN 4.21 Hz  
 POINT 26214  
 FREQU 31446.54 Hz  
 SCANS 73  
 ACQTM 0.8336 sec  
 PD 2.0000 sec  
 PW1 3.40 usec  
 IRNUC 1H  
 CTEMP 22.1 c  
 SLVNT CDCL3  
 EXREF 77.00 ppm  
 BF 0.12 Hz  
 RGAIN 60

C:\Users\valice\Desktop\ChenSM\11\_proton.als

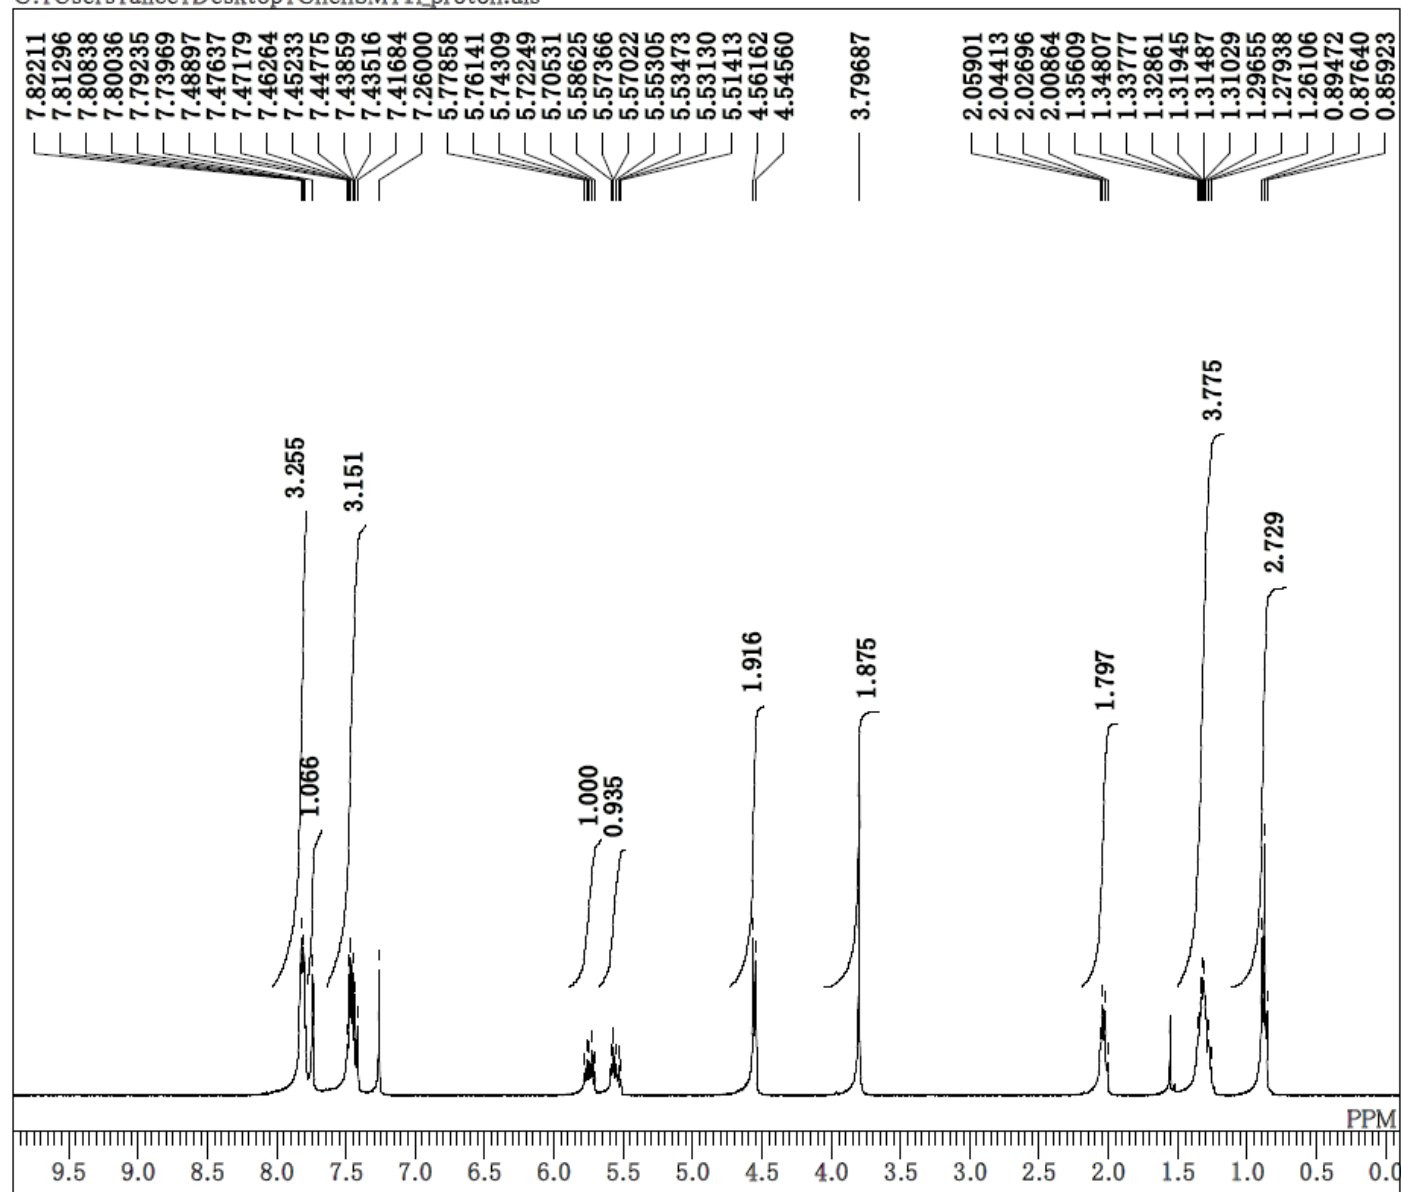

DFILE 11\_proton.als  
 COMNT  
 DATIM 26-06-2019 17:18:19  
 OBNUC 1H  
 EXMOD proton.jxp  
 OBFRQ 391.78 MHz  
 OBSET 8.51 KHz  
 OBFIN 3.34 Hz  
 POINT 13107  
 FREQU 5878.90 Hz  
 SCANS 8  
 ACQTM 2.2295 sec  
 PD 6.0000 sec  
 PW1 5.17 usec  
 IRNUC 1H  
 CTEMP 20.8 c  
 SLVNT CDCL3  
 EXREF 7.26 ppm  
 BF 0.12 Hz  
 RGAIN 42

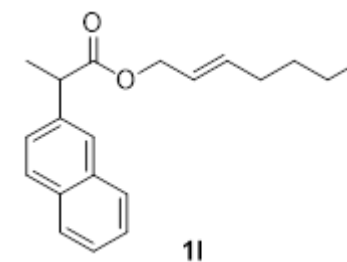

C:\Users\alice\Desktop\ChenSM\11\_carbon.als

DFILE 11\_carbon.als  
 COMNT  
 DATIM 26-06-2019 17:38:59  
 OBNUC 13C  
 EXMOD carbon.jpg  
 OBFRQ 98.52 MHz  
 OBSET 4.64 KHz  
 OBFIN 8.74 Hz  
 POINT 26214  
 FREQU 24630.54 Hz  
 SCANS 150  
 ACQTM 1.0643 sec  
 PD 2.0000 sec  
 PW1 3.12 usec  
 IRNUC 1H  
 CTEMP 20.5 c  
 SLVNT CDCL3  
 EXREF 77.00 ppm  
 BF 0.12 Hz  
 RGAIN 60

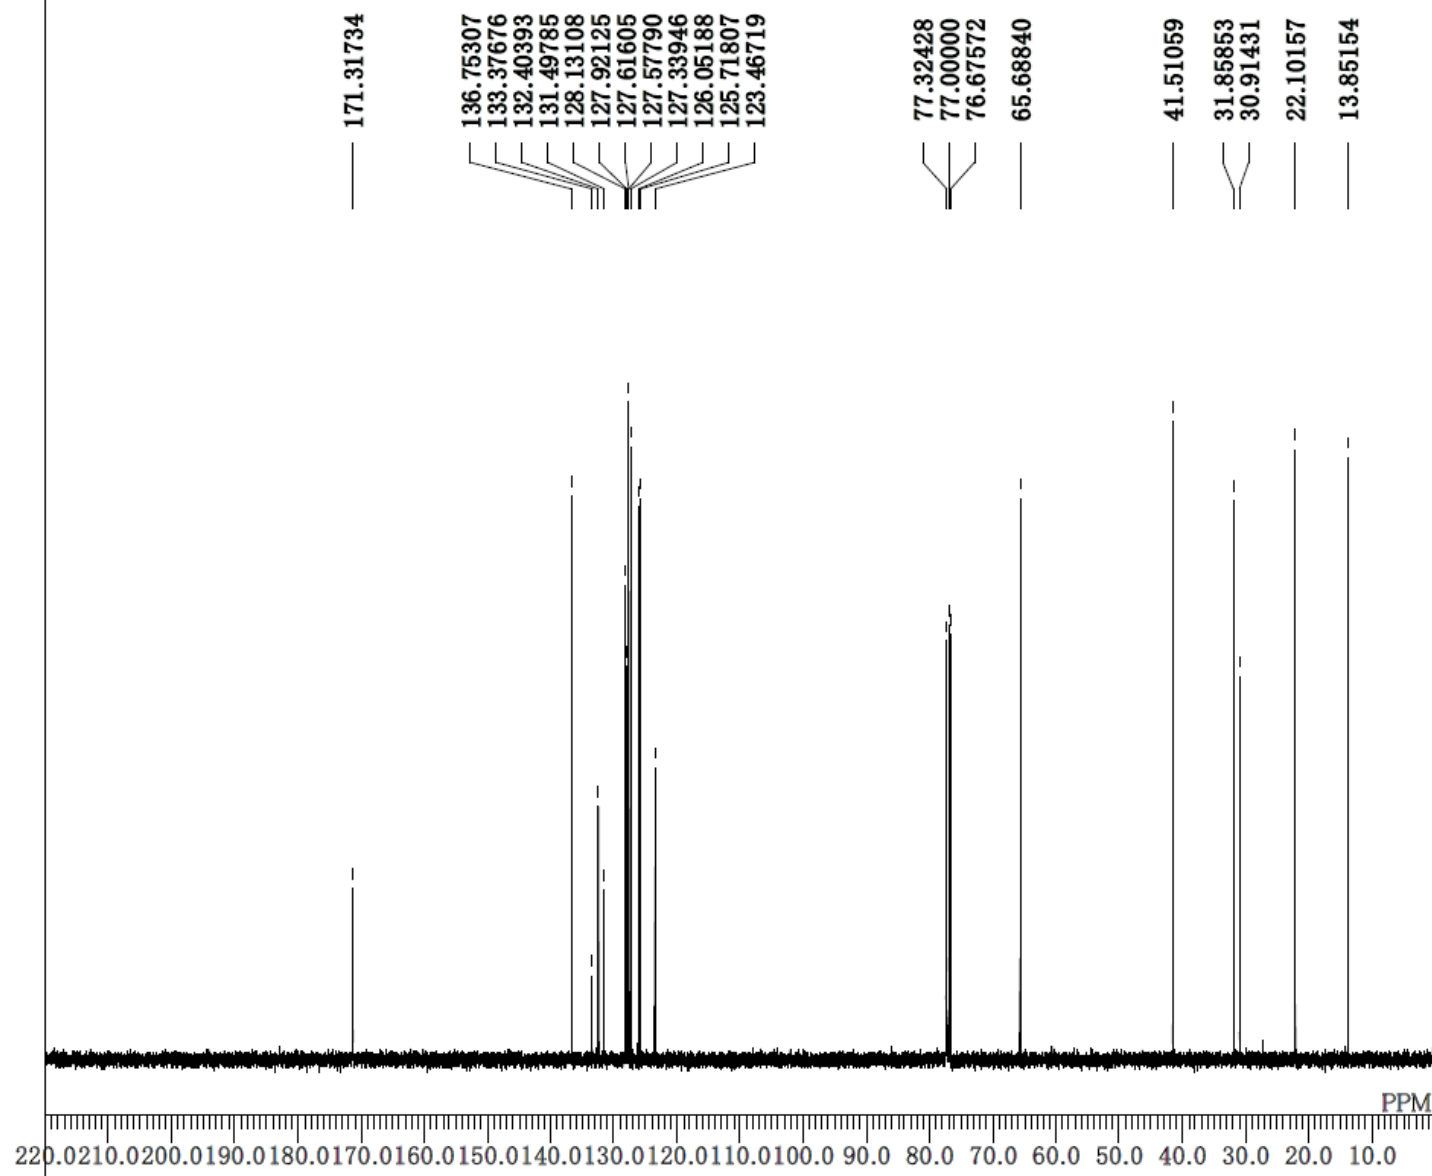

C:\Users\valice\Desktop\ChenSM\1m\_proton.als

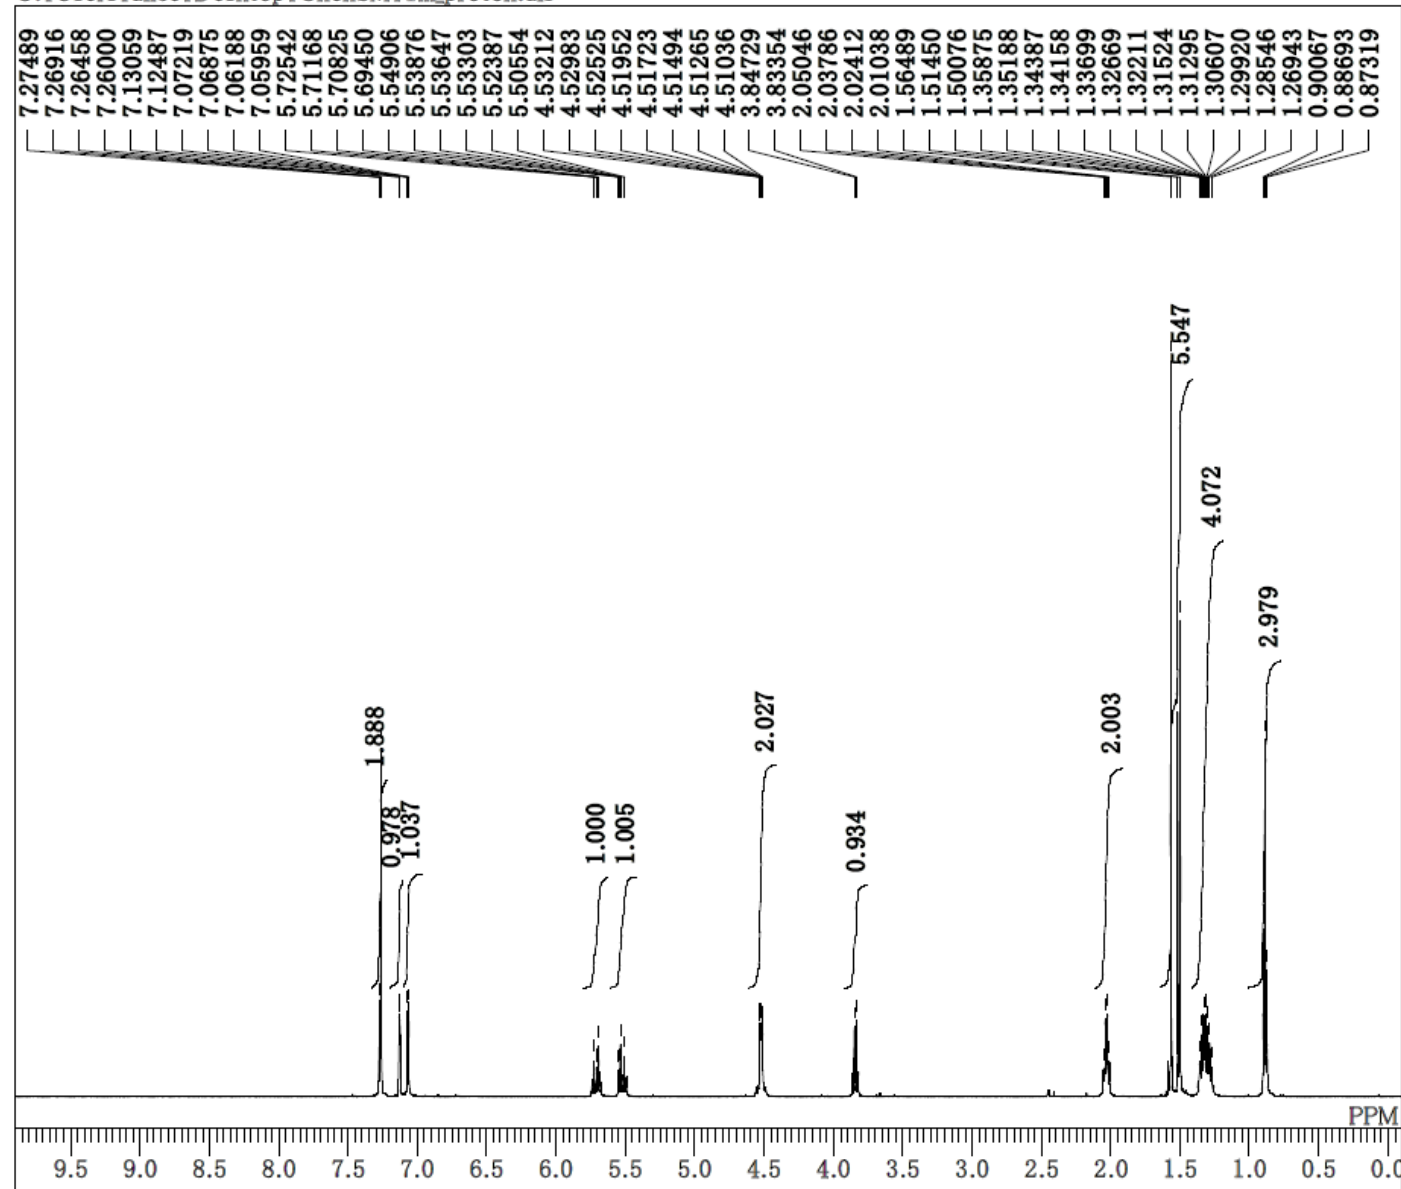

DFILE 1m\_proton.als  
 COMNT  
 DATIM 2019-10-26 16:41:17  
 OBNUC 1H  
 EXMOD proton.jxp  
 OBFRQ 500.16 MHz  
 OBSET 2.41 KHz  
 OBFIN 6.01 Hz  
 POINT 13107  
 FREQU 7507.51 Hz  
 SCANS 8  
 ACQTM 1.7459 sec  
 PD 6.0000 sec  
 PW1 5.55 usec  
 IRNUC 1H  
 CTEMP 21.9 c  
 SLVNT CDCL3  
 EXREF 7.26 ppm  
 BF 0.12 Hz  
 RGAIN 50

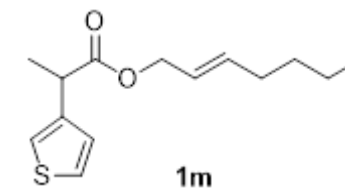

C:\Users\Valice\Desktop\ChenSM\1m\_carbon.als

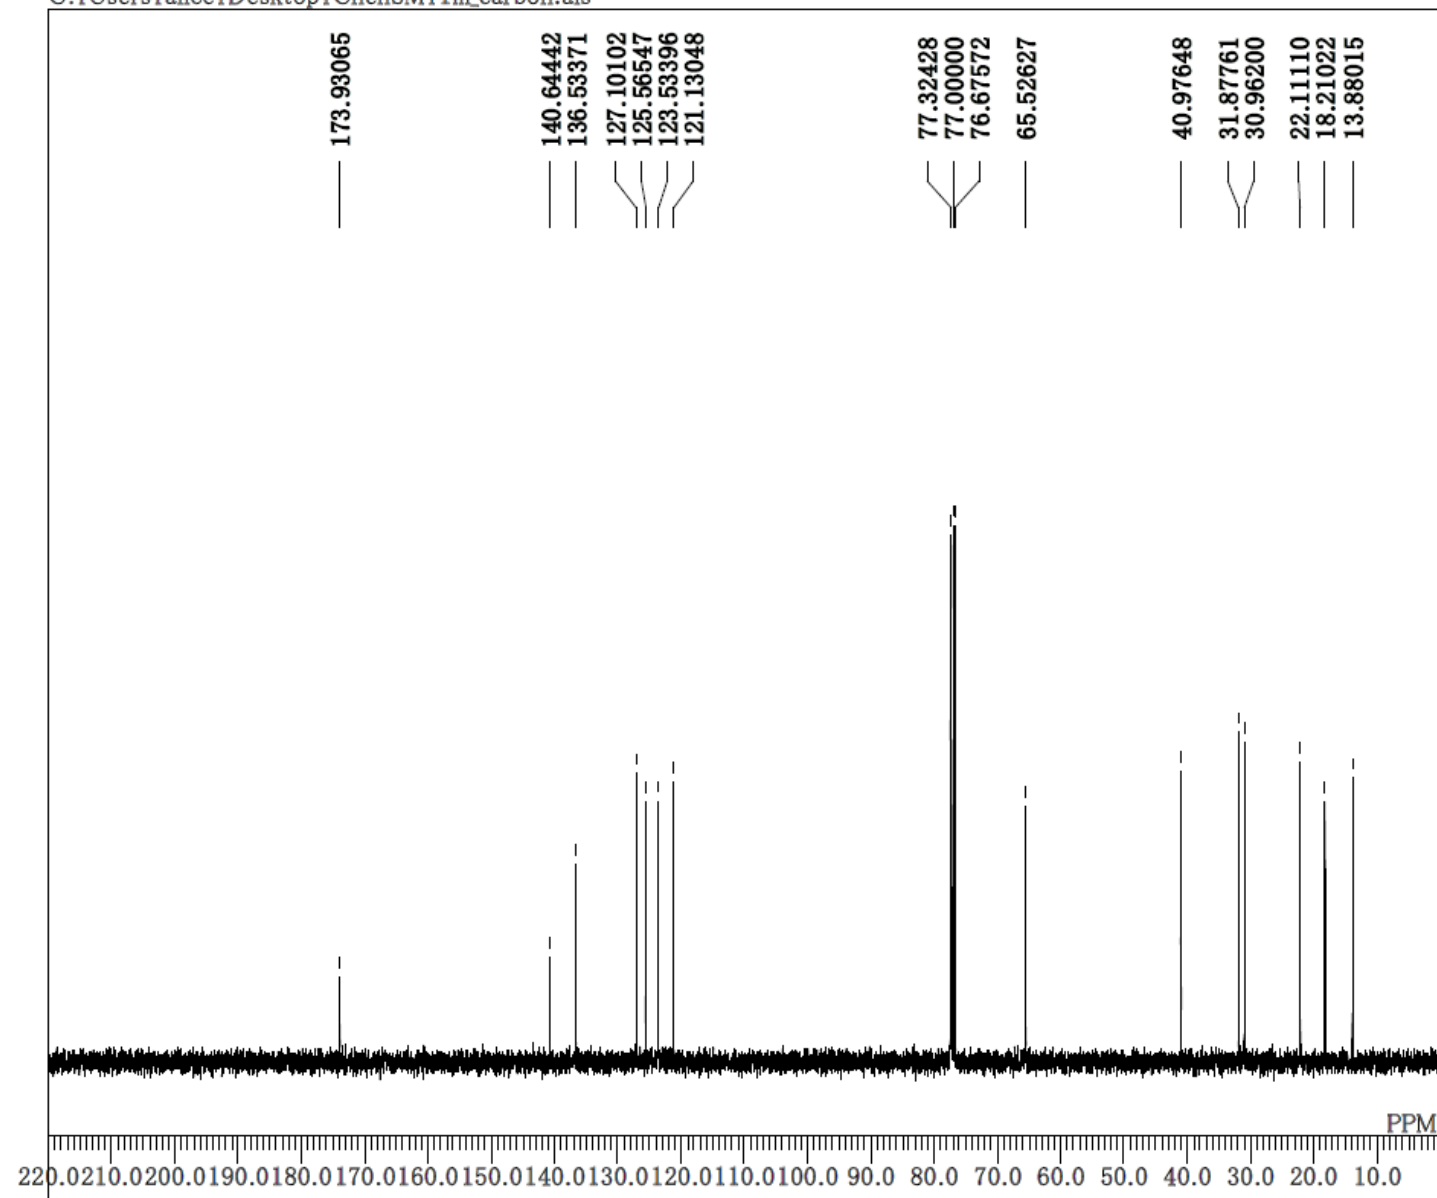

DFILE 1m\_carbon.als  
 COMNT  
 DATIM 26-10-2019 17:39:16  
 OBNUC 13C  
 EXMOD carbon.jpg  
 OBFRQ 98.52 MHz  
 OBSET 4.64 KHz  
 OBFIN 8.74 Hz  
 POINT 26214  
 FREQU 24630.54 Hz  
 SCANS 65  
 ACQTM 1.0643 sec  
 PD 2.0000 sec  
 PW1 3.12 usec  
 IRNUC 1H  
 CTEMP 21.0 c  
 SLVNT CDCL3  
 EXREF 77.00 ppm  
 BF 1.20 Hz  
 RGAIN 60

C:\Users\alice\Desktop\ChenSM\1n\_proton.als

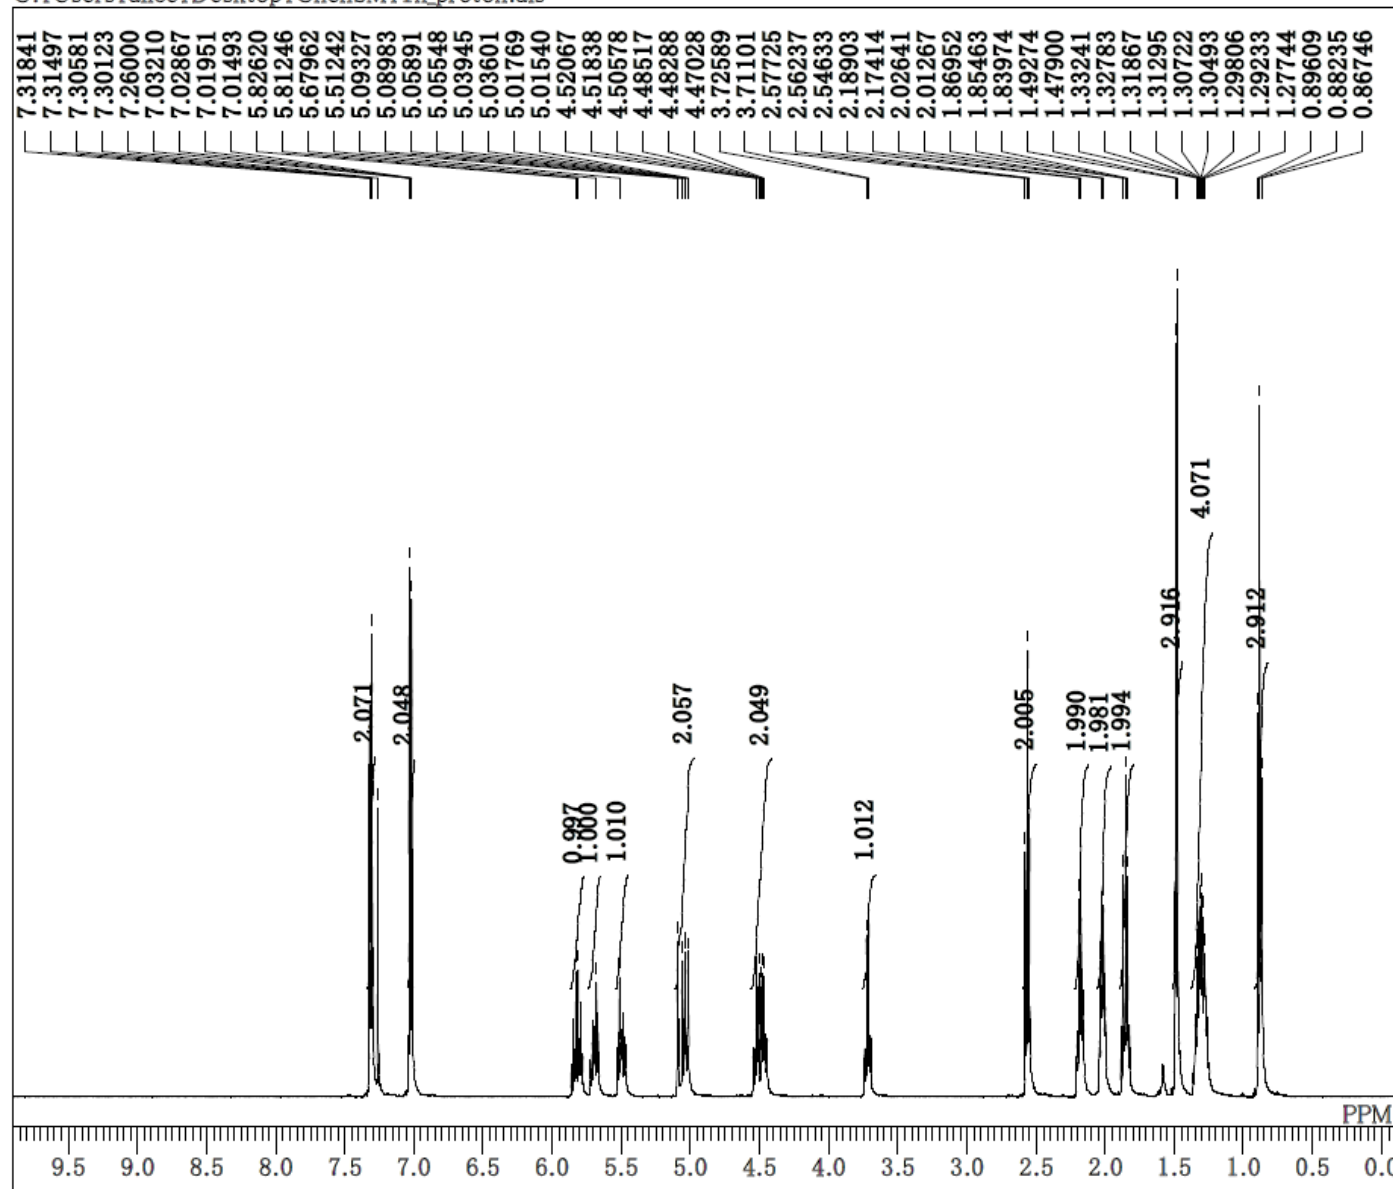

DFILE 1n\_proton.als  
 COMNT  
 DATIM 2019-12-13 23:14:22  
 OBNUC 1H  
 EXMOD proton.jxp  
 OBFRQ 500.16 MHz  
 OBSET 2.41 KHz  
 OBFIN 6.01 Hz  
 POINT 13107  
 FREQU 7507.51 Hz  
 SCANS 8  
 ACQTM 1.7459 sec  
 PD 6.0000 sec  
 PW1 5.55 usec  
 IRNUC 1H  
 CTEMP 21.3 c  
 SLVNT CDCL3  
 EXREF 7.26 ppm  
 BF 0.12 Hz  
 RGAIN 40

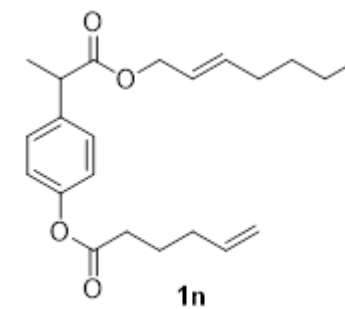



C:\Users\alice\Desktop\ChenSM\1n\_carbon.als

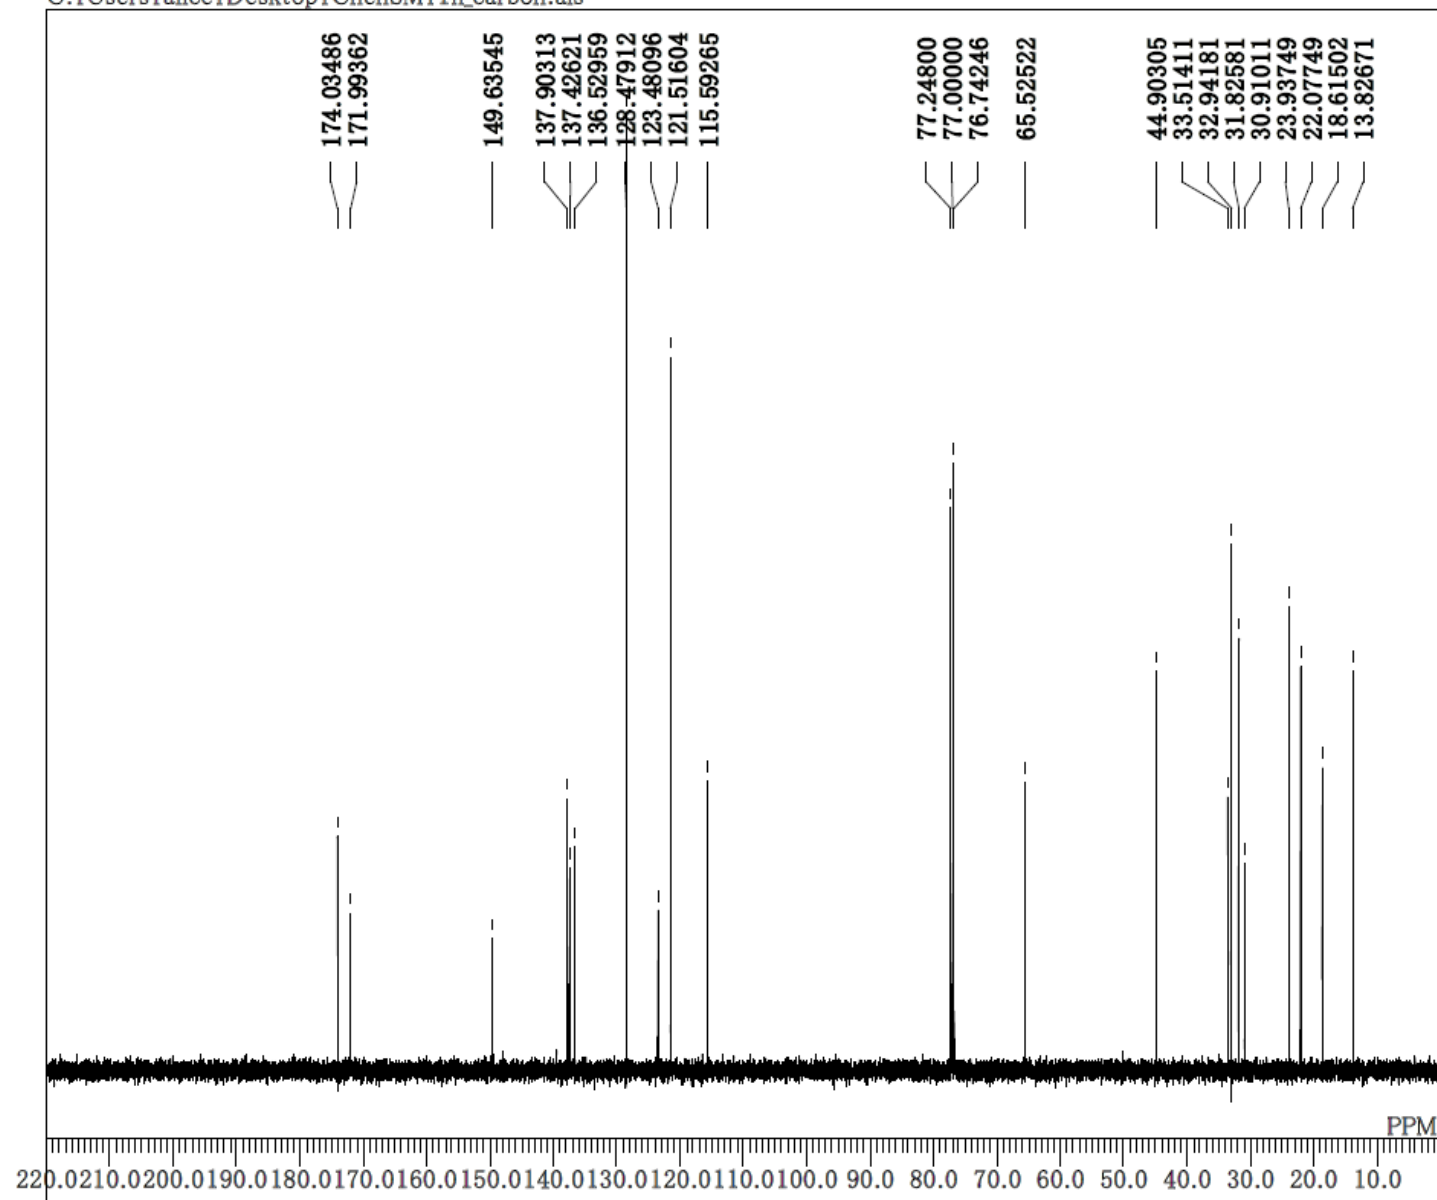

DFILE 1n\_carbon.als  
 COMNT  
 DATIM 2019-12-14 00:06:20  
 OBNUC 13C  
 EXMOD carbon.jxp  
 OBFRQ 125.77 MHz  
 OBSET 7.87 KHz  
 OBFIN 4.21 Hz  
 POINT 26214  
 FREQU 31446.54 Hz  
 SCANS 65  
 ACQTM 0.8336 sec  
 PD 2.0000 sec  
 PW1 3.40 usec  
 IRNUC 1H  
 CTEMP 21.5 c  
 SLVNT CDCL3  
 EXREF 77.00 ppm  
 BF 0.12 Hz  
 RGAIN 60

C:\Users\valice\Desktop\ChenSM\1o\_proton.als

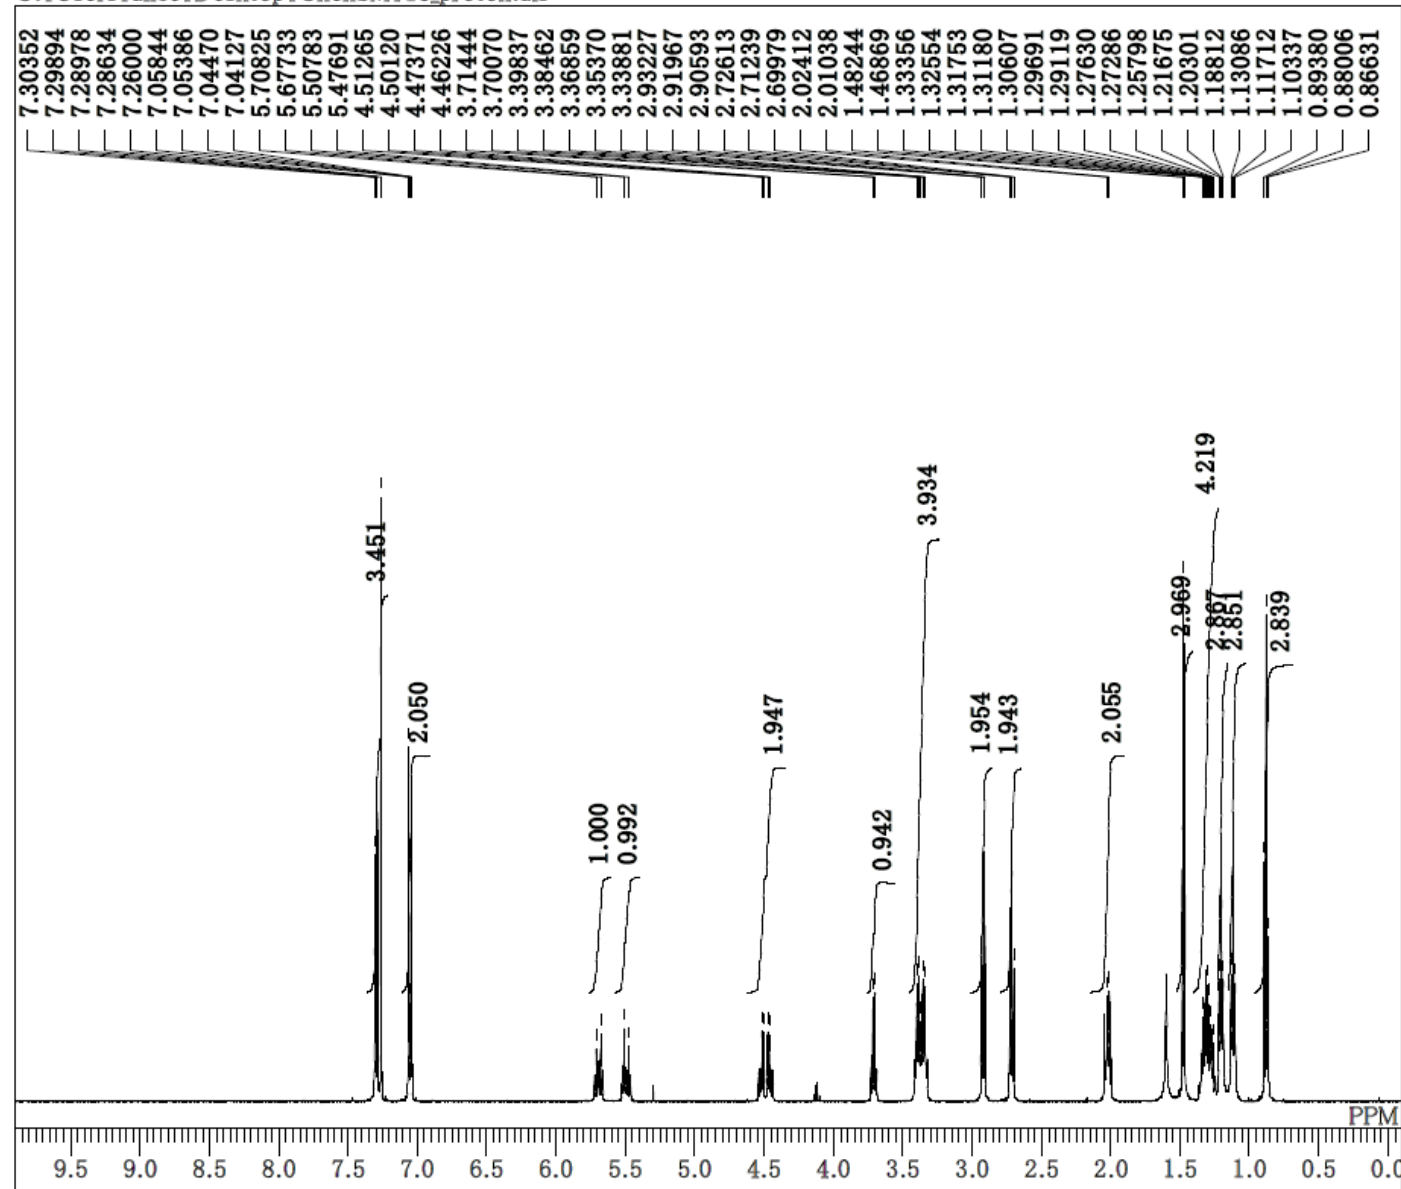

DFILE 1o\_proton.als  
 COMNT  
 DATIM 2019-12-05 14:09:11  
 OBNUC 1H  
 EXMOD proton.jxp  
 OBFRQ 500.16 MHz  
 OBSET 2.41 KHz  
 OBFIN 6.01 Hz  
 POINT 13107  
 FREQU 7507.51 Hz  
 SCANS 8  
 ACQTM 1.7459 sec  
 PD 6.0000 sec  
 PW1 5.55 usec  
 IRNUC 1H  
 CTEMP 21.4 c  
 SLVNT CDCL3  
 EXREF 7.26 ppm  
 BF 0.12 Hz  
 RGAIN 42

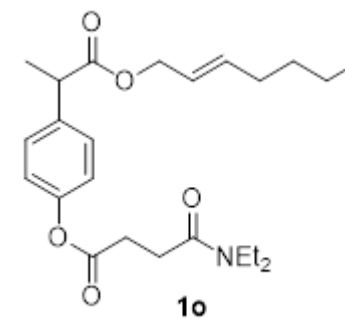

C:\Users\alice\Desktop\ChenSM\1o\_carbon.als

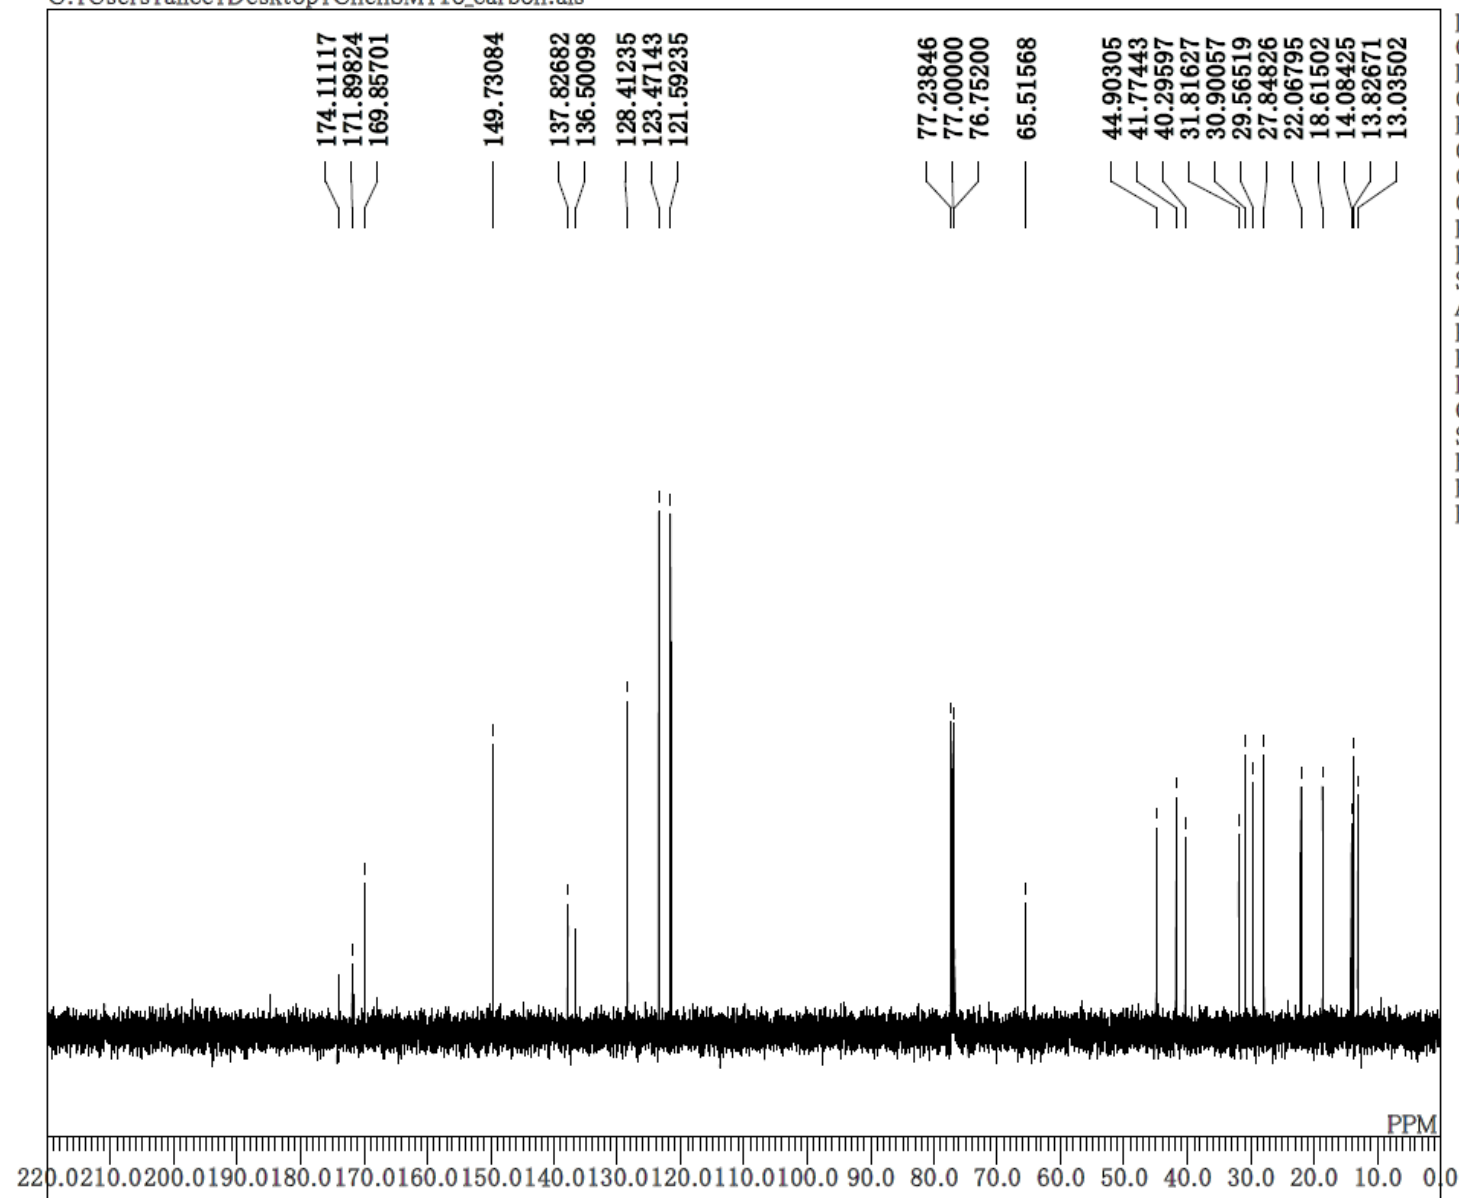

DFILE 1o\_carbon.als  
 COMNT  
 DATIM 2019-12-05 14:25:59  
 OBNUC 13C  
 EXMOD carbon.jxp  
 OBFRQ 125.77 MHz  
 OBSET 7.87 KHz  
 OBFIN 4.21 Hz  
 POINT 26214  
 FREQU 31446.54 Hz  
 SCANS 60  
 ACQTM 0.8336 sec  
 PD 2.0000 sec  
 PW1 3.40 usec  
 IRNUC 1H  
 CTEMP 21.5 c  
 SLVNT CDCL3  
 EXREF 77.00 ppm  
 BF 0.12 Hz  
 RGAIN 60

C:\Users\Valice\Desktop\ChenSM\1p\_proton.als

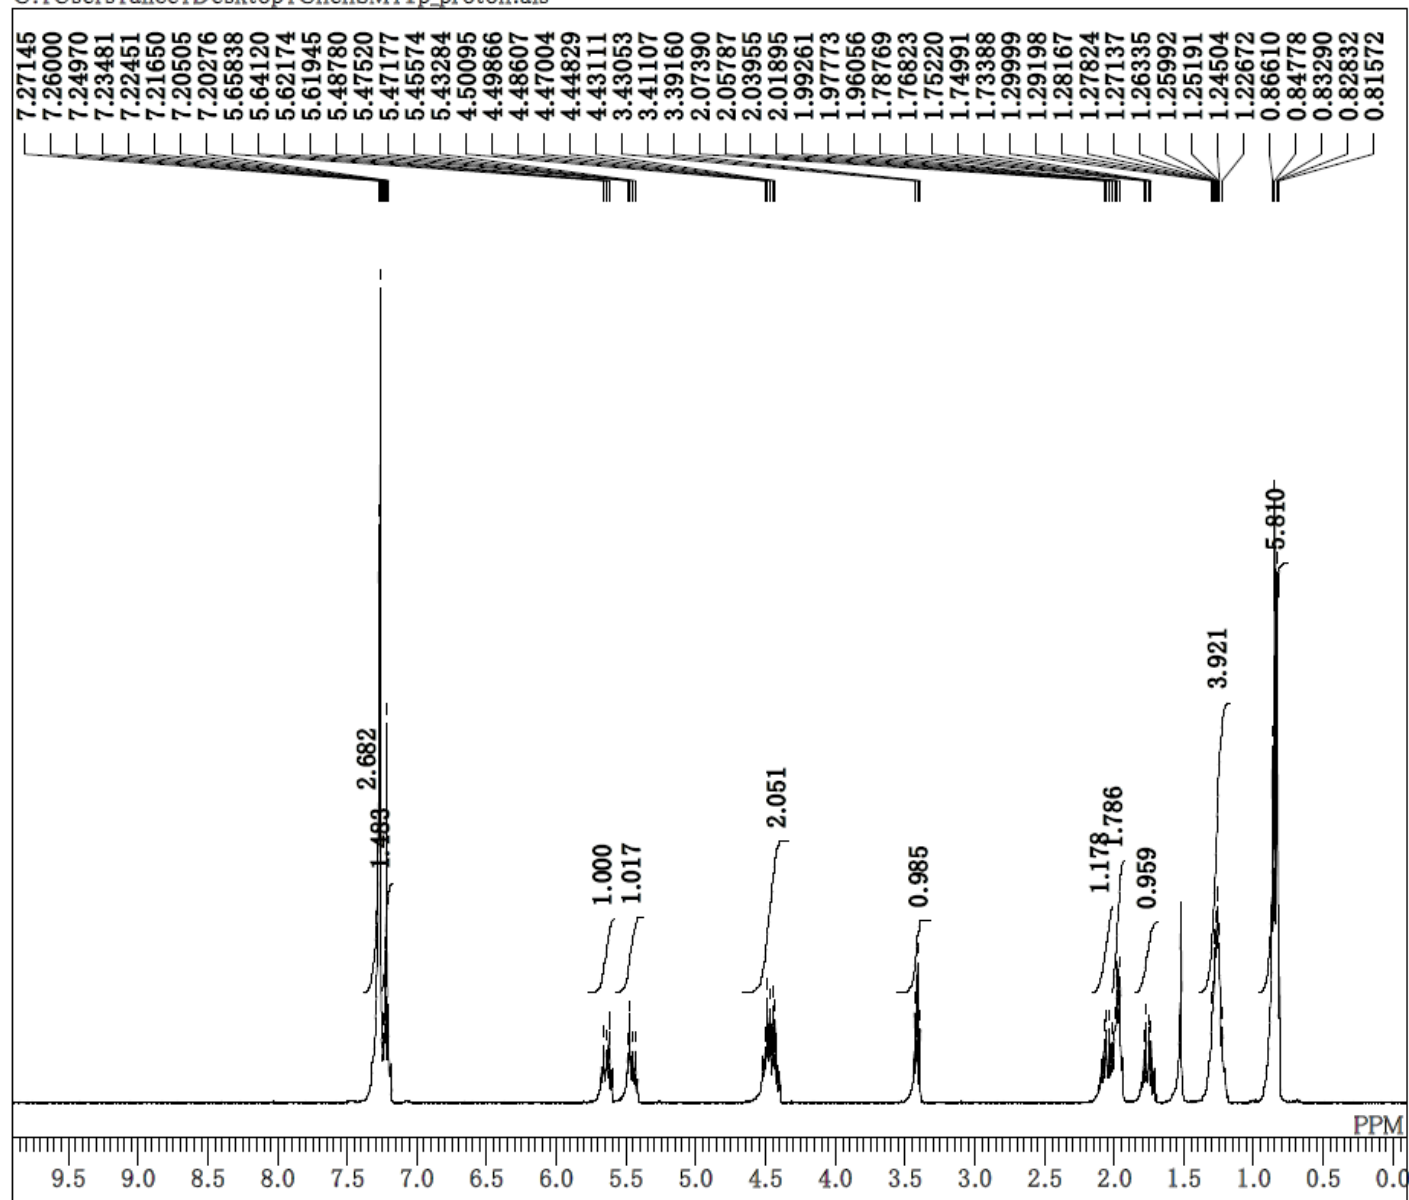

DFILE 1p\_proton.als  
 COMNT  
 DATIM 23-06-2019 19:55:29  
 OBNUC 1H  
 EXMOD proton.jxp  
 OBFRQ 391.78 MHz  
 OBSET 8.51 KHz  
 OBFIN 3.34 Hz  
 POINT 13107  
 FREQU 5878.90 Hz  
 SCANS 8  
 ACQTM 2.2295 sec  
 PD 6.0000 sec  
 PW1 5.17 usec  
 IRNUC 1H  
 CTEMP 20.8 c  
 SLVNT CDCL3  
 EXREF 7.26 ppm  
 BF 0.12 Hz  
 RGAIN 42

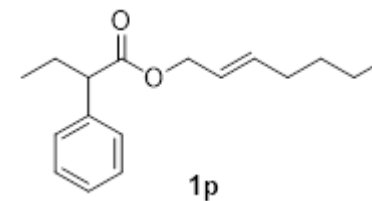

C:\Users\Valice\Desktop\ChenSM\1p\_carbon.als

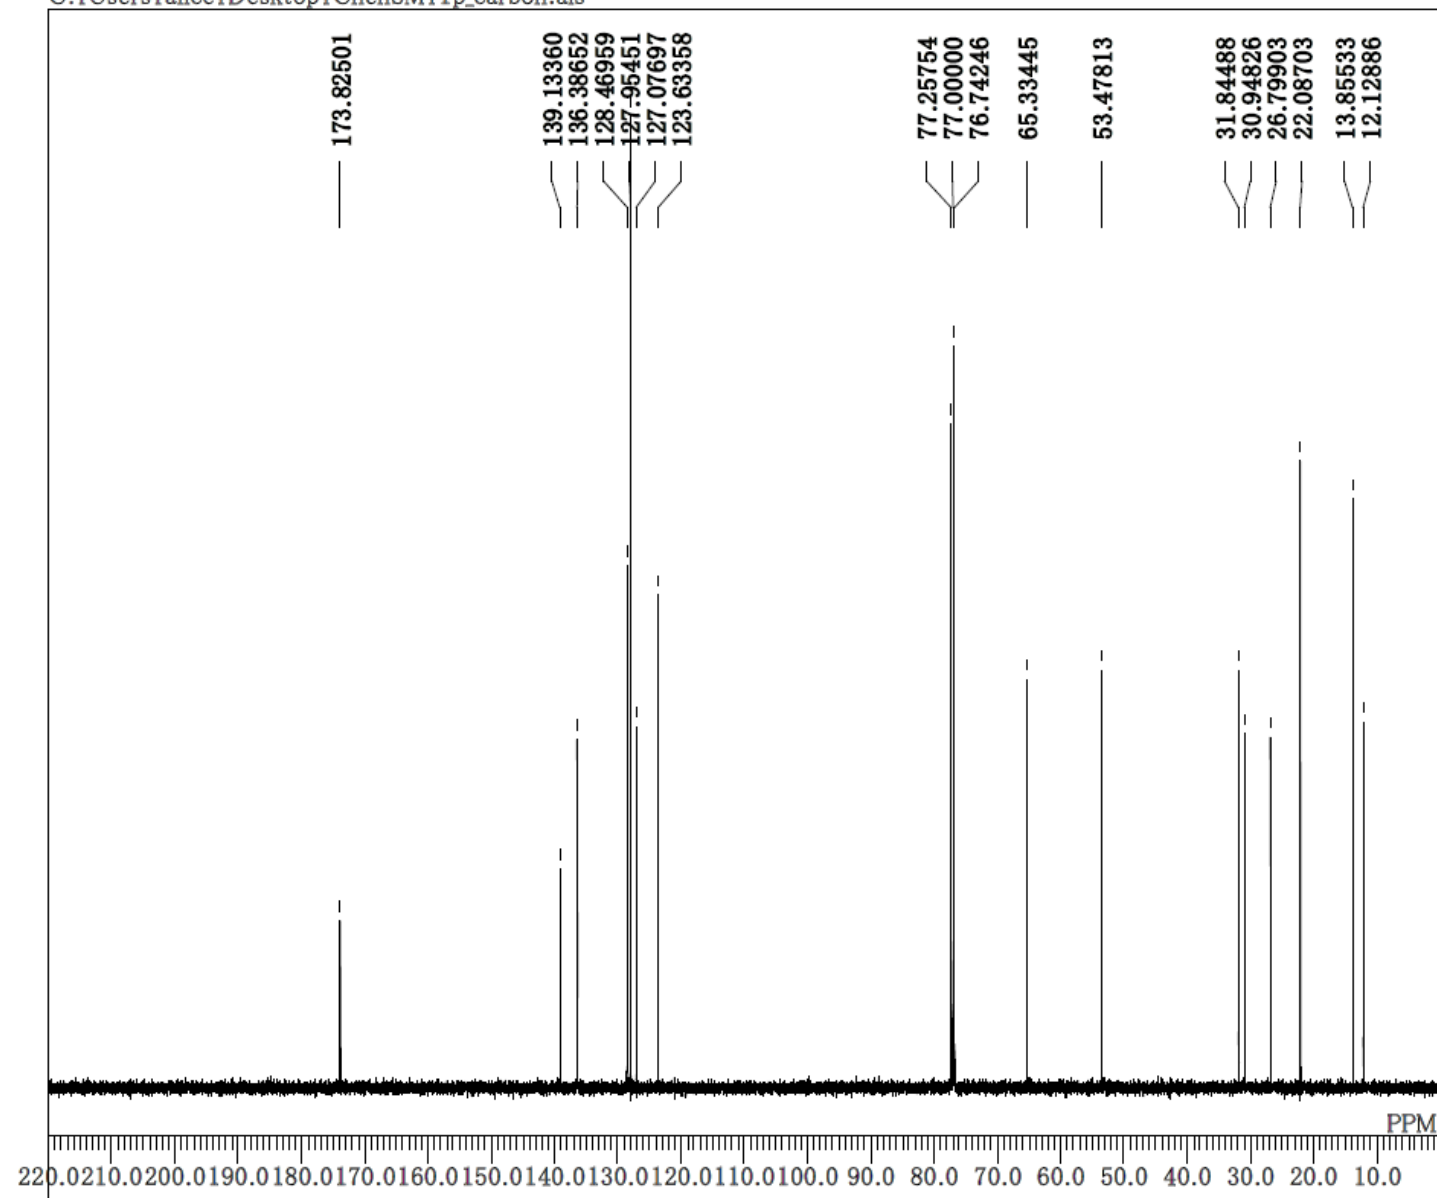

DFILE 1p\_carbon.als  
 COMNT  
 DATIM 2019-06-23 19:57:47  
 OBNUC 13C  
 EXMOD carbon.jxp  
 OBFRQ 125.77 MHz  
 OBSET 7.87 KHz  
 OBFIN 4.21 Hz  
 POINT 26214  
 FREQU 31446.54 Hz  
 SCANS 326  
 ACQTM 0.8336 sec  
 PD 2.0000 sec  
 PW1 3.40 usec  
 IRNUC 1H  
 CTEMP 22.2 c  
 SLVNT CDCL3  
 EXREF 77.00 ppm  
 BF 0.12 Hz  
 RGAIN 60

C:\Users\valice\Desktop\ChenSM\1q\_proton.als

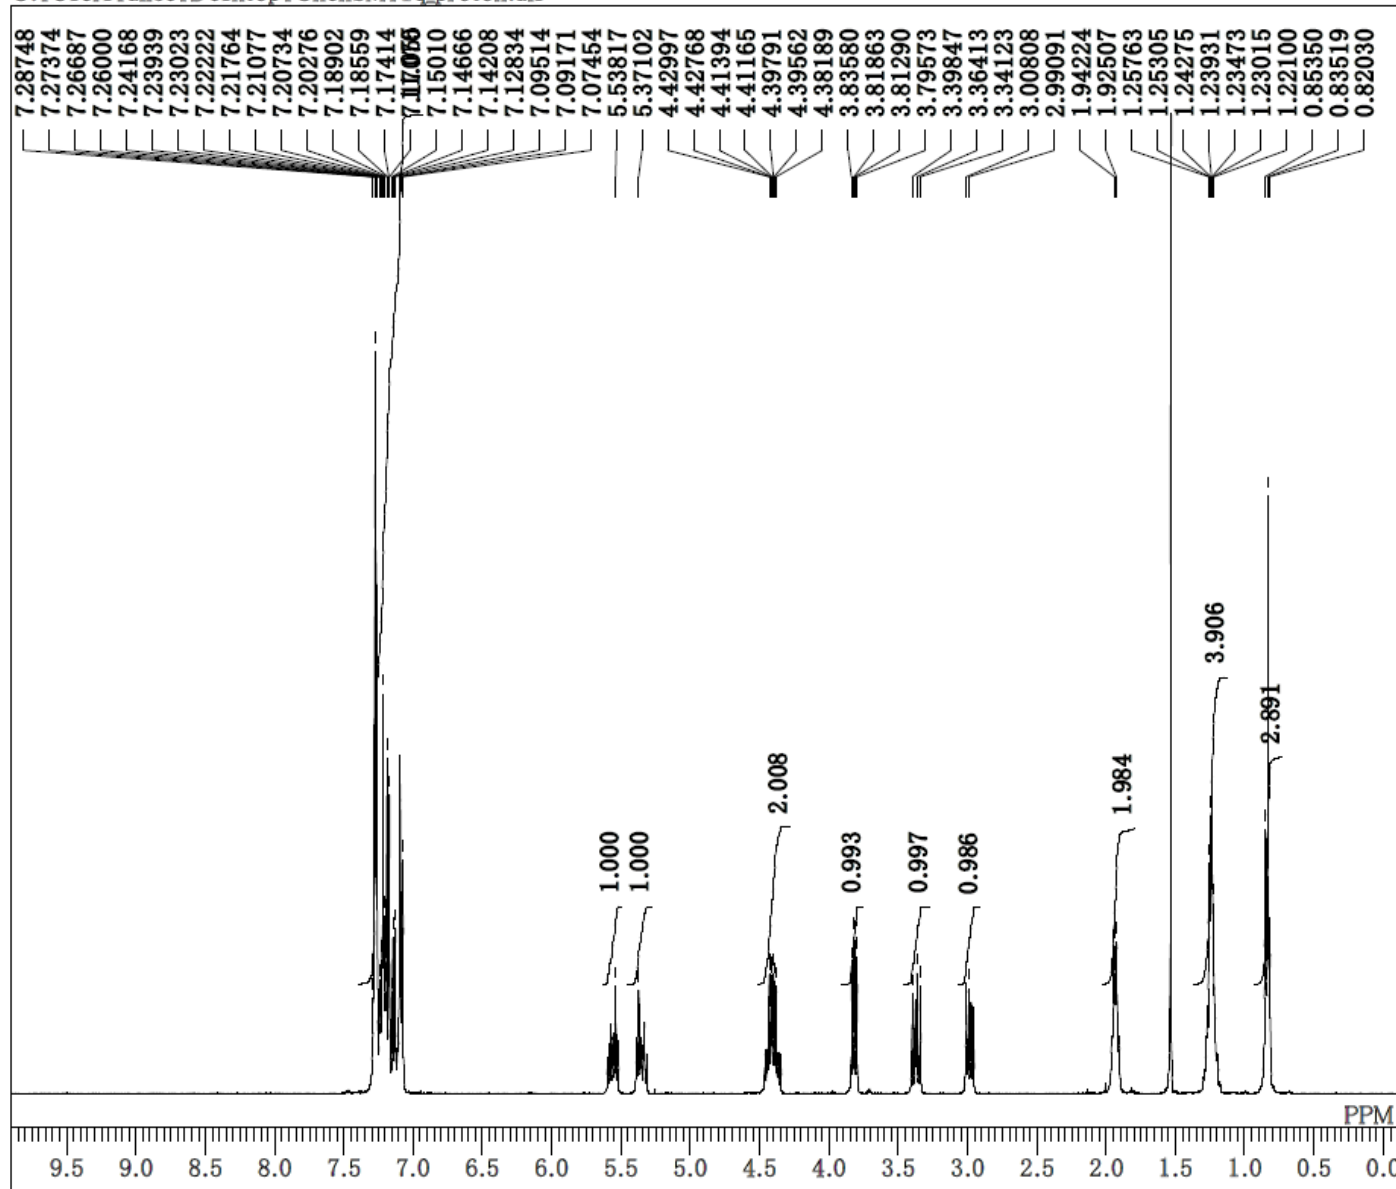

DFILE 1q\_proton.als  
 COMNT  
 DATIM 10-08-2019 15:42:49  
 OBNUC 1H  
 EXMOD proton.jxp  
 OBFRQ 391.78 MHz  
 OBSET 8.51 KHz  
 OBFIN 3.34 Hz  
 POINT 13107  
 FREQU 5878.90 Hz  
 SCANS 8  
 ACQTM 2.2295 sec  
 PD 6.0000 sec  
 PW1 5.17 usec  
 IRNUC 1H  
 CTEMP 21.0 c  
 SLVNT CDCL3  
 EXREF 7.26 ppm  
 BF 0.12 Hz  
 RGAIN 38

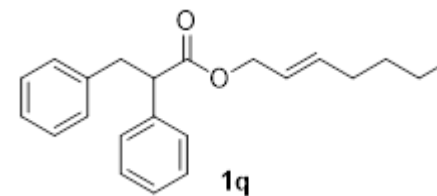

C:\Users\alice\Desktop\ChenSM\1q\_carbon.als

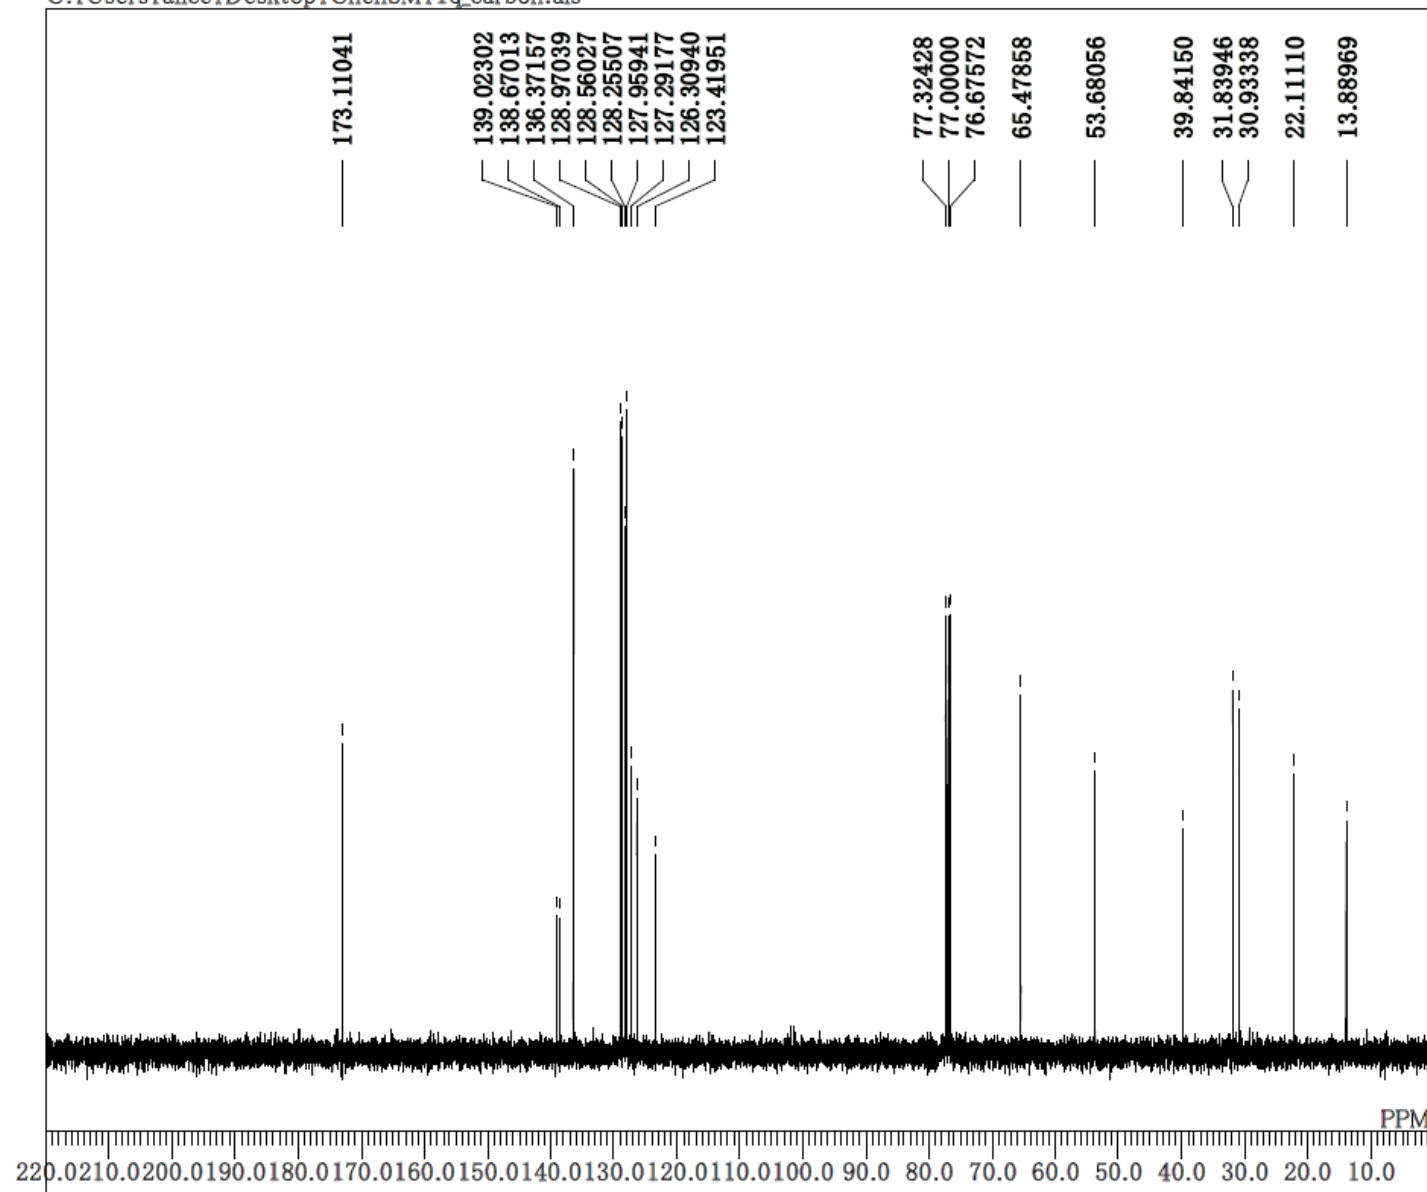

DFILE 1q\_carbon.als  
 COMNT  
 DATIM 10-08-2019 15:53:30  
 OBNUC 13C  
 EXMOD carbon.jpg  
 OBFRQ 98.52 MHz  
 OBSET 4.64 KHz  
 OBFIN 8.74 Hz  
 POINT 26214  
 FREQU 24630.54 Hz  
 SCANS 120  
 ACQTM 1.0643 sec  
 PD 2.0000 sec  
 PW1 3.12 usec  
 IRNUC 1H  
 CTEMP 21.2 c  
 SLVNT CDCL3  
 EXREF 77.00 ppm  
 BF 0.12 Hz  
 RGAIN 60

C:\Users\alice\Desktop\ChenSM\1r\_protein.als

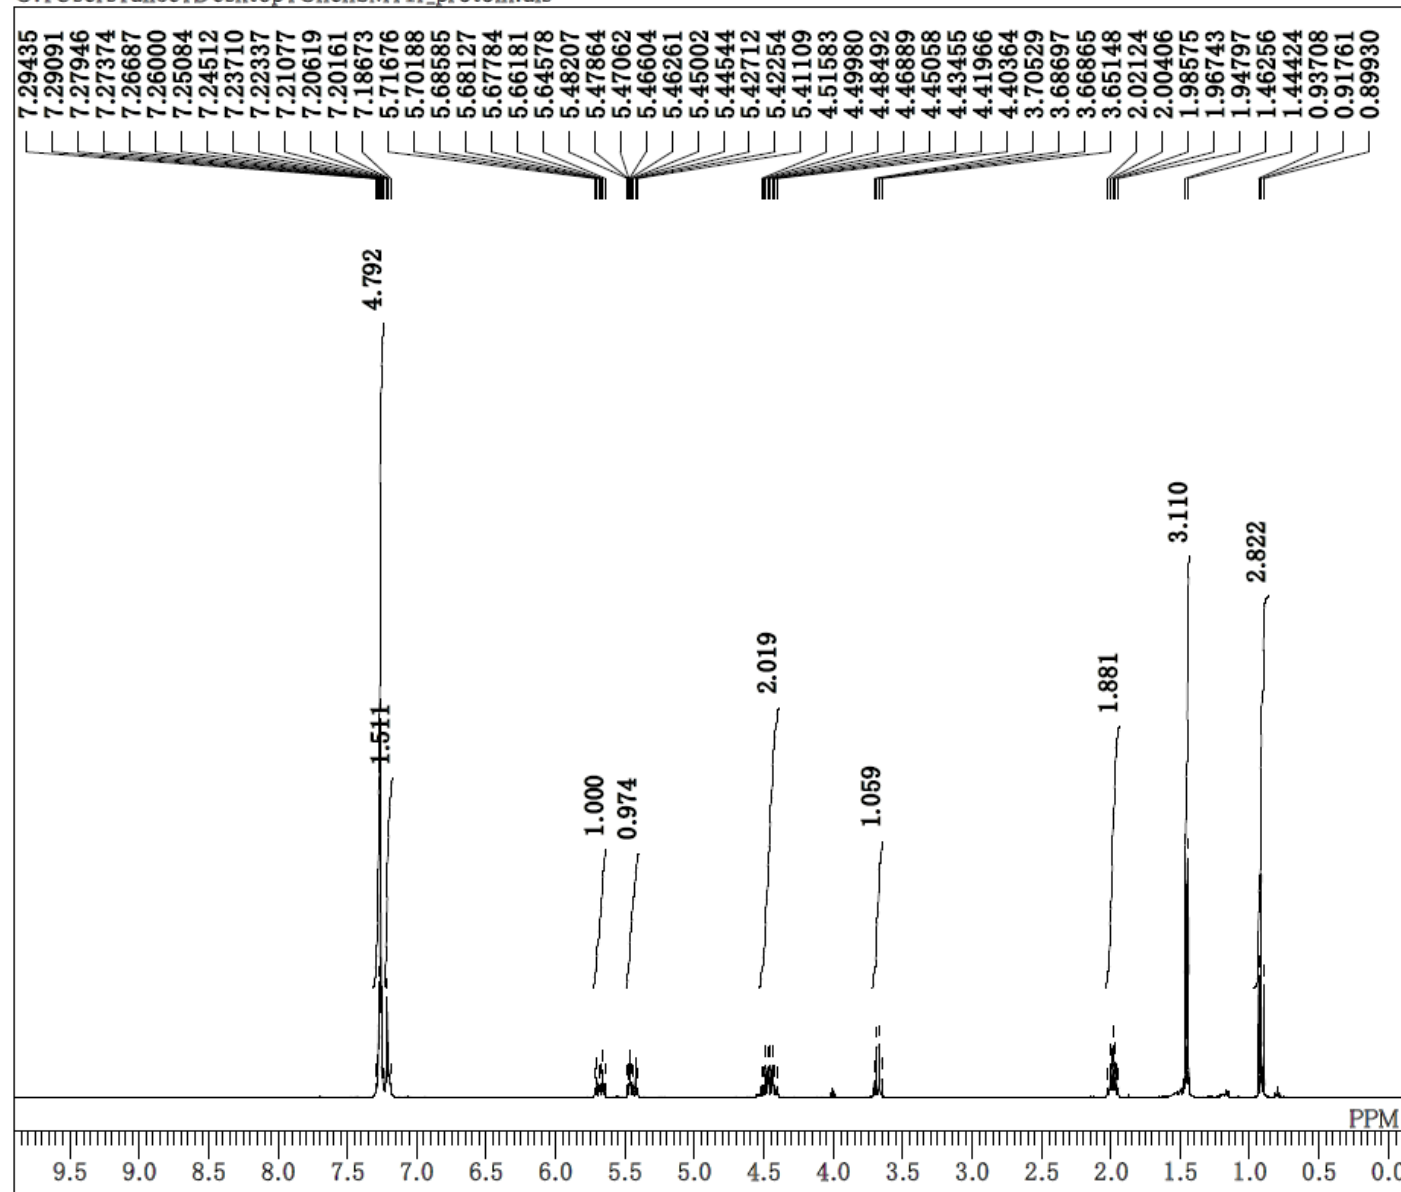

DFILE  
COMNT  
DATIM  
OBNUC  
EXMOD  
OBFRQ  
OBSET  
OBFIN  
POINT  
FREQU  
SCANS  
ACQTM  
PD  
PW1  
IRNUC  
CTEMP  
SLVNT  
EXREF  
BF  
RGAIN

1r\_protein.als  
25-03-2020 20:58:12  
1H  
proton.jxp  
391.78 MHz  
8.51 KHz  
3.34 Hz  
13107  
5878.90 Hz  
8  
2.2295 sec  
6.0000 sec  
5.17 usec  
1H  
20.2 c  
CDCL3  
7.26 ppm  
0.12 Hz  
40

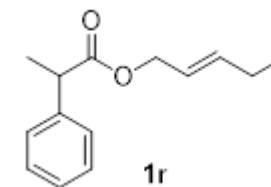



C:\Users\alice\Desktop\ChenSM\1r\_carbon.als

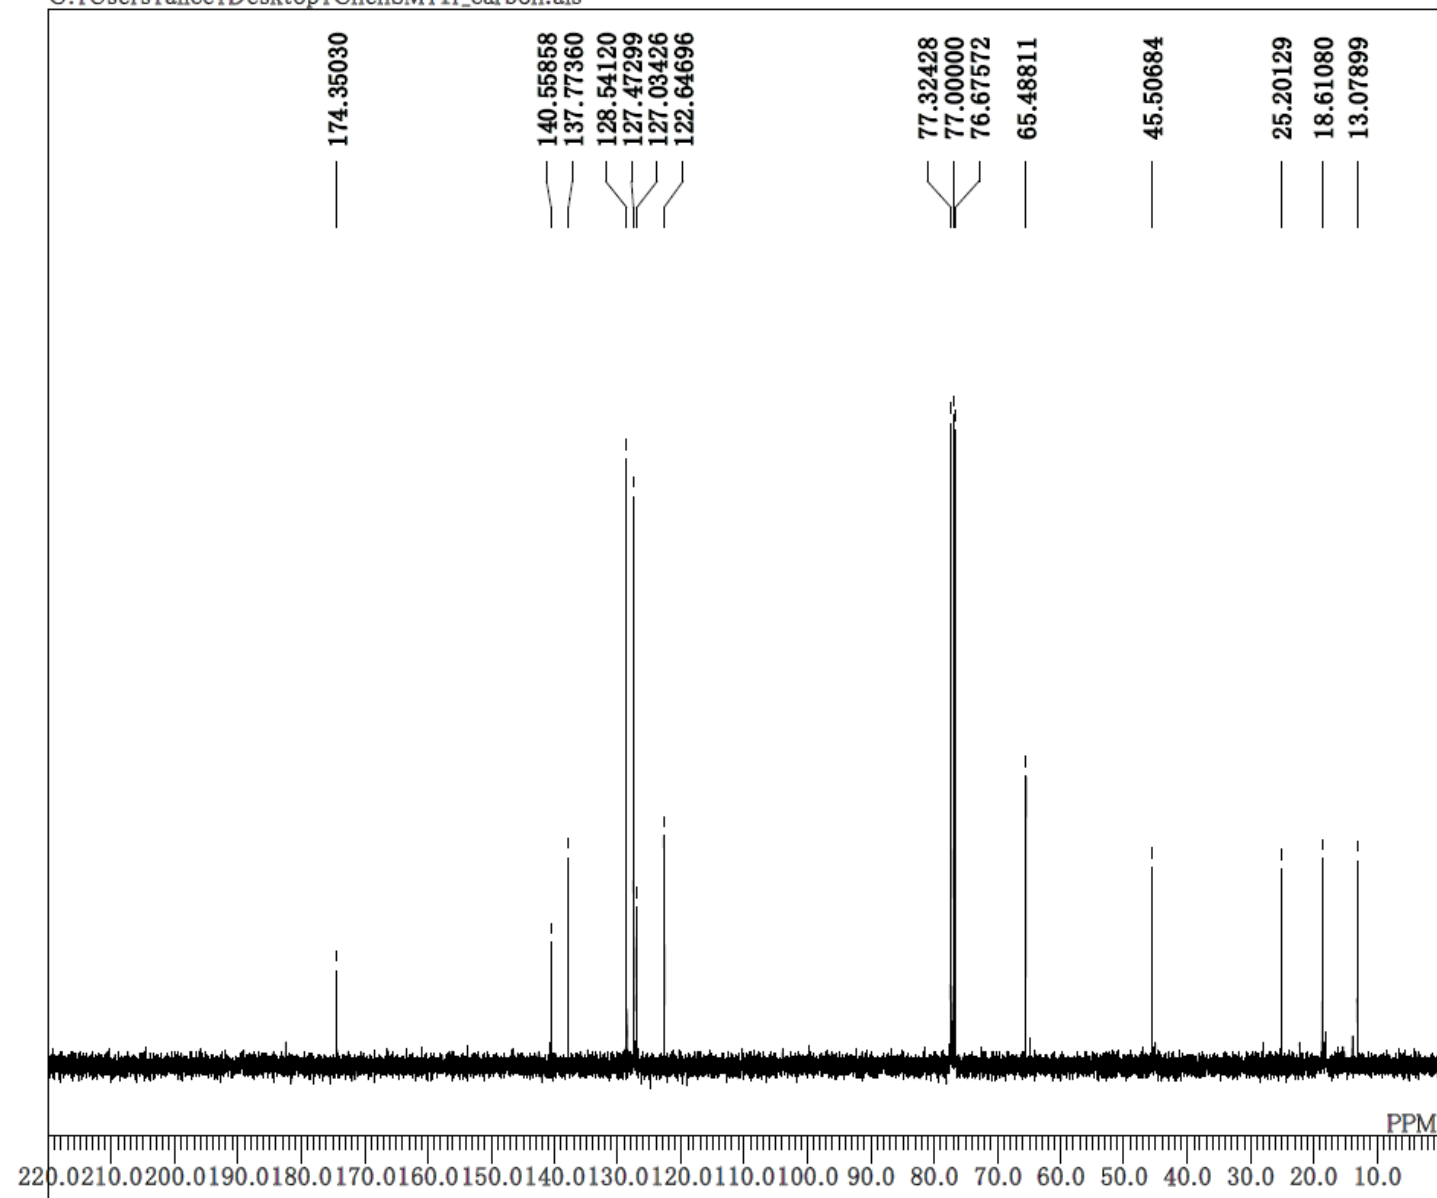

DFILE 1r\_carbon.als  
COMNT  
DATIM 25-03-2020 13:05:47  
OBNUC 13C  
EXMOD carbon.jxp  
OBFRQ 98.52 MHz  
OBSET 4.64 KHz  
OBFIN 8.74 Hz  
POINT 26214  
FREQU 24630.54 Hz  
SCANS 189  
ACQTM 1.0643 sec  
PD 2.0000 sec  
PW1 3.12 usec  
IRNUC 1H  
CTEMP 20.5 c  
SLVNT CDCL3  
EXREF 77.00 ppm  
BF 0.12 Hz  
RGAIN 60

C:\Users\valice\Desktop\ChenSM\1s\_proton.als

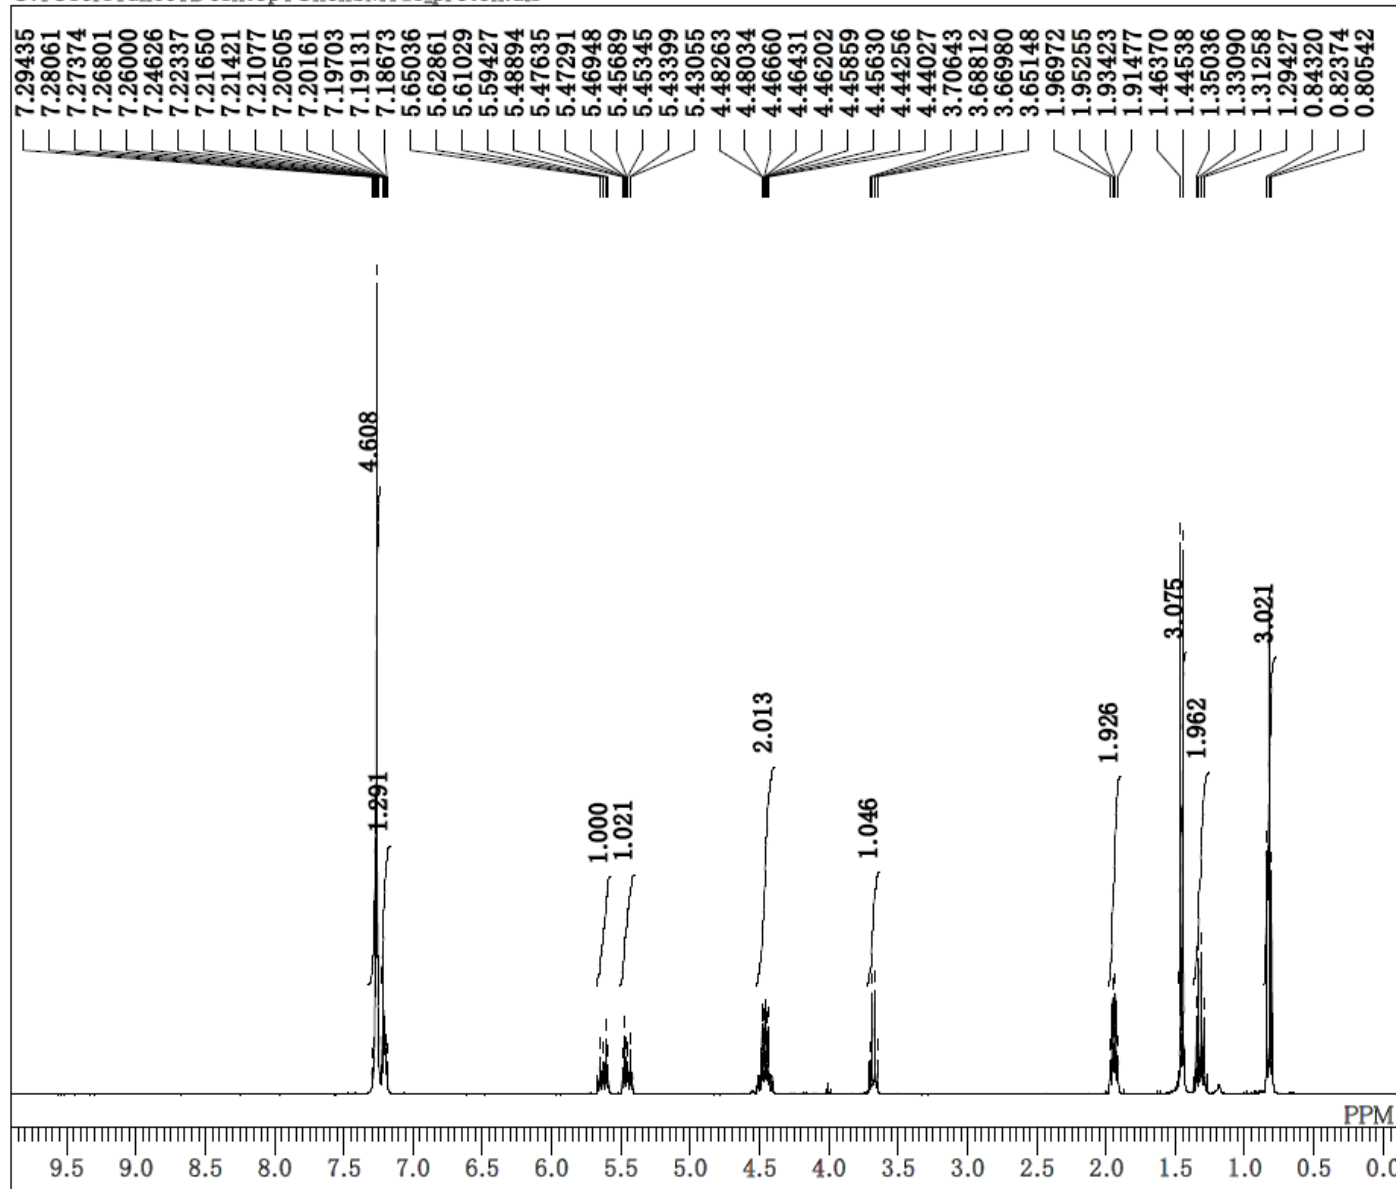

DFILE 1s\_proton.als  
 COMNT  
 DATIM 24-03-2020 21:32:43  
 OBNUC <sup>1</sup>H  
 EXMOD proton.jxp  
 OBFRQ 391.78 MHz  
 OBSET 8.51 KHz  
 OBFIN 3.34 Hz  
 POINT 13107  
 FREQU 5878.90 Hz  
 SCANS 8  
 ACQTM 2.2295 sec  
 PD 6.0000 sec  
 PW1 5.17 usec  
 IRNUC <sup>1</sup>H  
 CTEMP 19.8 c  
 SLVNT CDCL<sub>3</sub>  
 EXREF 7.26 ppm  
 BF 0.12 Hz  
 RGAIN 34

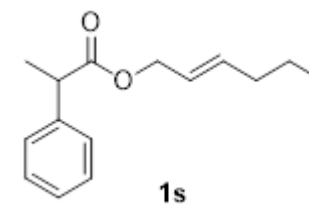

C:\Users\Valice\Desktop\ChenSM\1s\_carbon.als

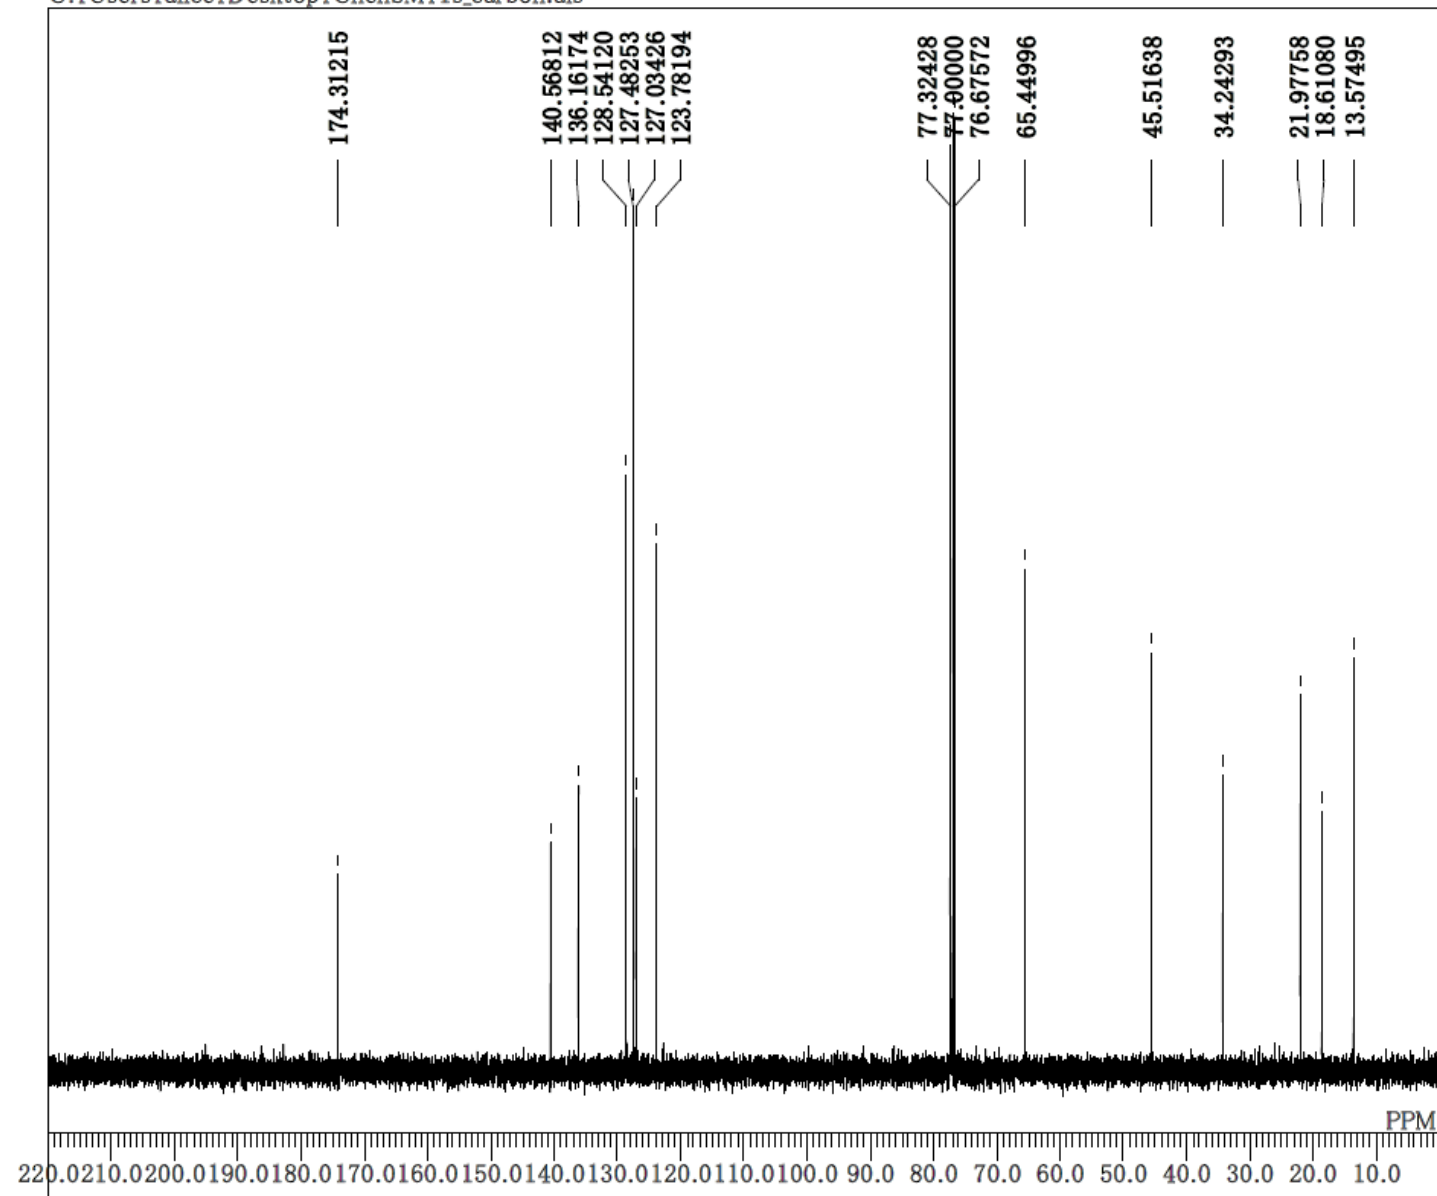

DFILE 1s\_carbon.als  
 COMNT  
 DATIM 24-03-2020 21:37:32  
 OBNUC 13C  
 EXMOD carbon.jpg  
 OBFRQ 98.52 MHz  
 OBSET 4.64 KHz  
 OBFIN 8.74 Hz  
 POINT 26214  
 FREQU 24630.54 Hz  
 SCANS 145  
 ACQTM 1.0643 sec  
 PD 2.0000 sec  
 PW1 3.12 usec  
 IRNUC 1H  
 CTEMP 20.5 c  
 SLVNT CDCL3  
 EXREF 77.00 ppm  
 BF 0.12 Hz  
 RGAIN 60

C:\Users\alice\Desktop\ChenSM\1t\_proton.als

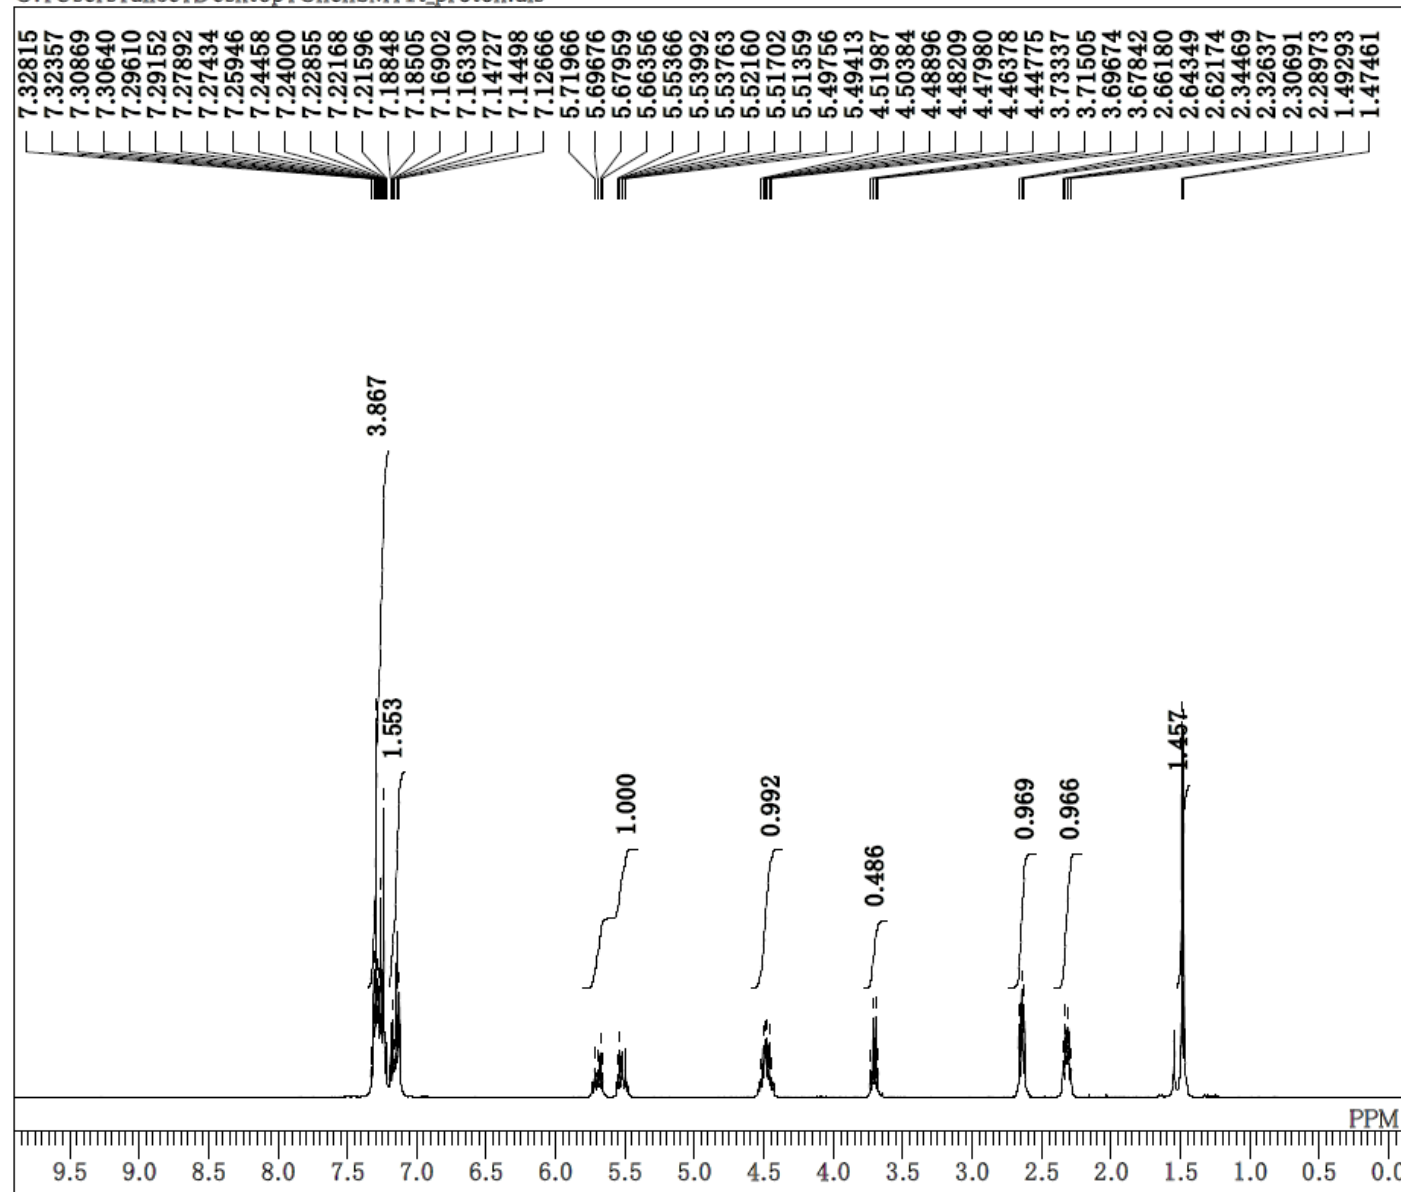

DFILE 1t\_proton.als  
 COMNT  
 DATIM 28-03-2020 17:55:37  
 OBNUC 1H  
 EXMOD proton.jxp  
 OBFRQ 391.78 MHz  
 OBSET 8.51 KHz  
 OBFIN 3.34 Hz  
 POINT 13107  
 FREQU 5878.90 Hz  
 SCANS 8  
 ACQTM 2.2295 sec  
 PD 6.0000 sec  
 PW1 5.17 usec  
 IRNUC 1H  
 CTEMP 20.2 c  
 SLVNT CDCL3  
 EXREF 7.24 ppm  
 BF 0.12 Hz  
 RGAIN 40

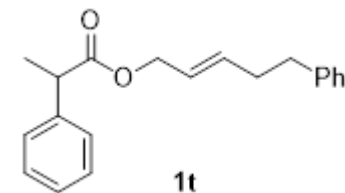

C:\Users\Valice\Desktop\ChenSM\1t\_carbon.als

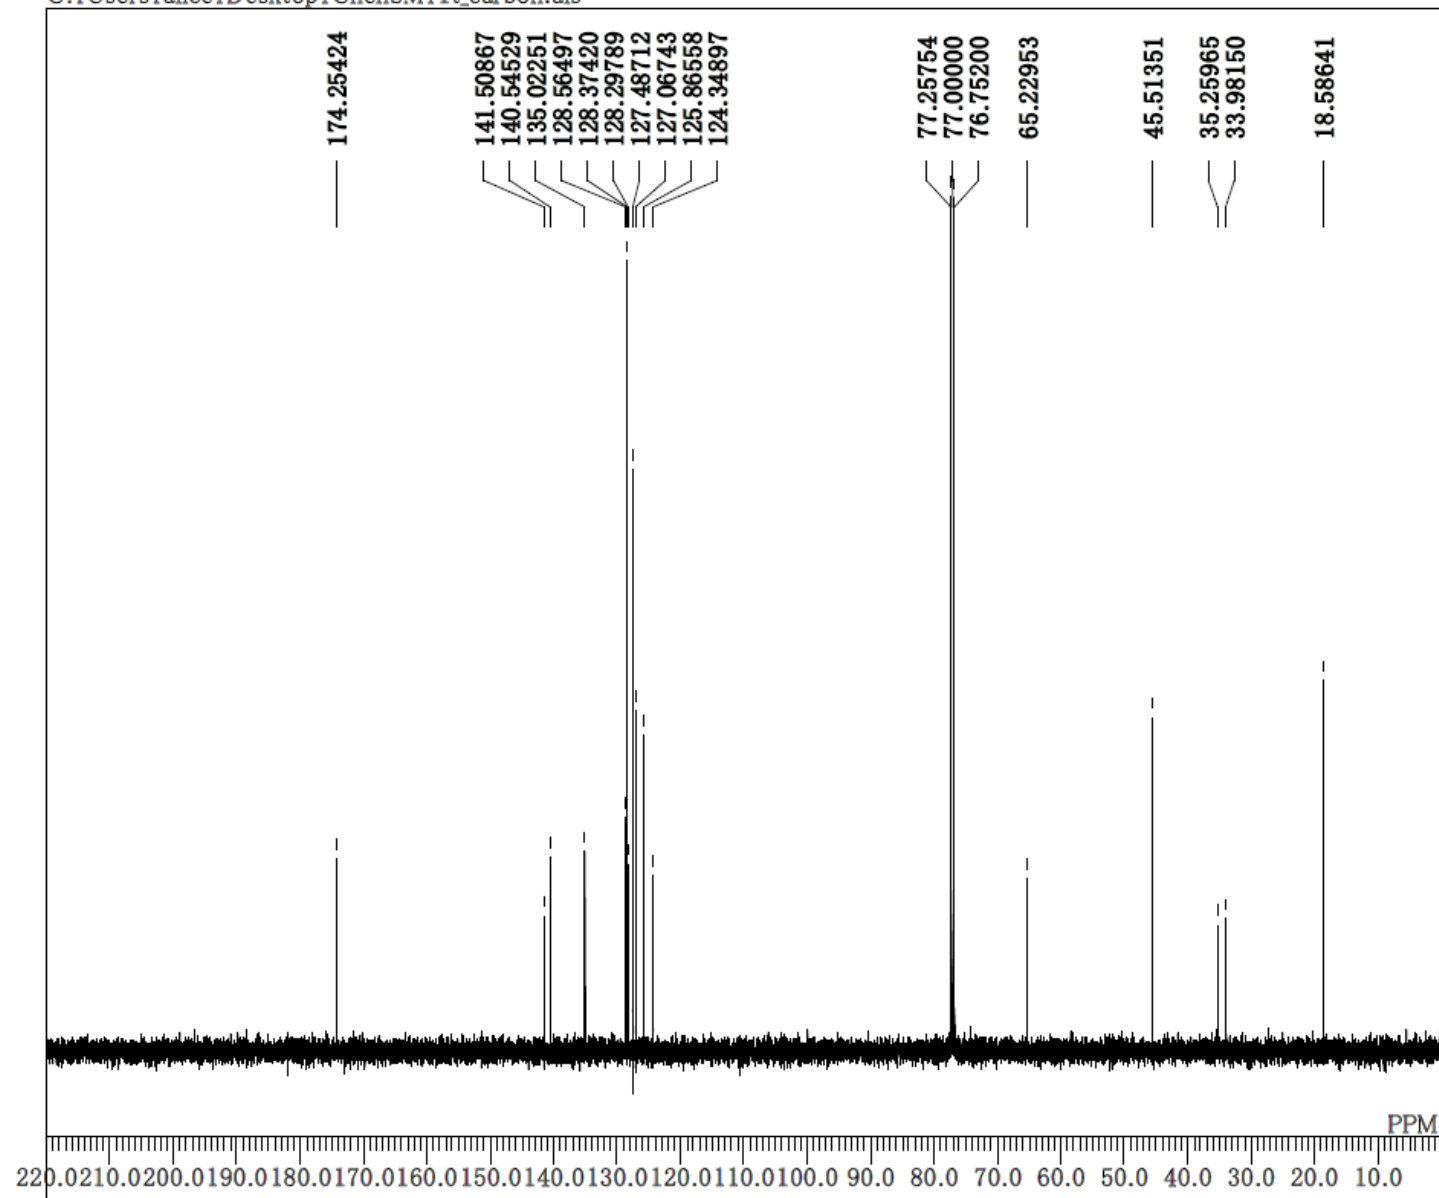

DFILE 1t\_carbon.als  
 COMNT  
 DATIM 2020-04-09 20:49:16  
 OBNUC 13C  
 EXMOD carbon.jpg  
 OBFRQ 125.77 MHz  
 OBSET 7.87 KHz  
 OBFIN 4.21 Hz  
 POINT 26214  
 FREQU 31446.54 Hz  
 SCANS 101  
 ACQTM 0.8336 sec  
 PD 2.0000 sec  
 PW1 3.40 usec  
 IRNUC 1H  
 CTEMP 21.6 c  
 SLVNT CDCL3  
 EXREF 77.00 ppm  
 BF 0.12 Hz  
 RGAIN 60

C:\Users\alice\Desktop\ChenSM\1u\_proton.als

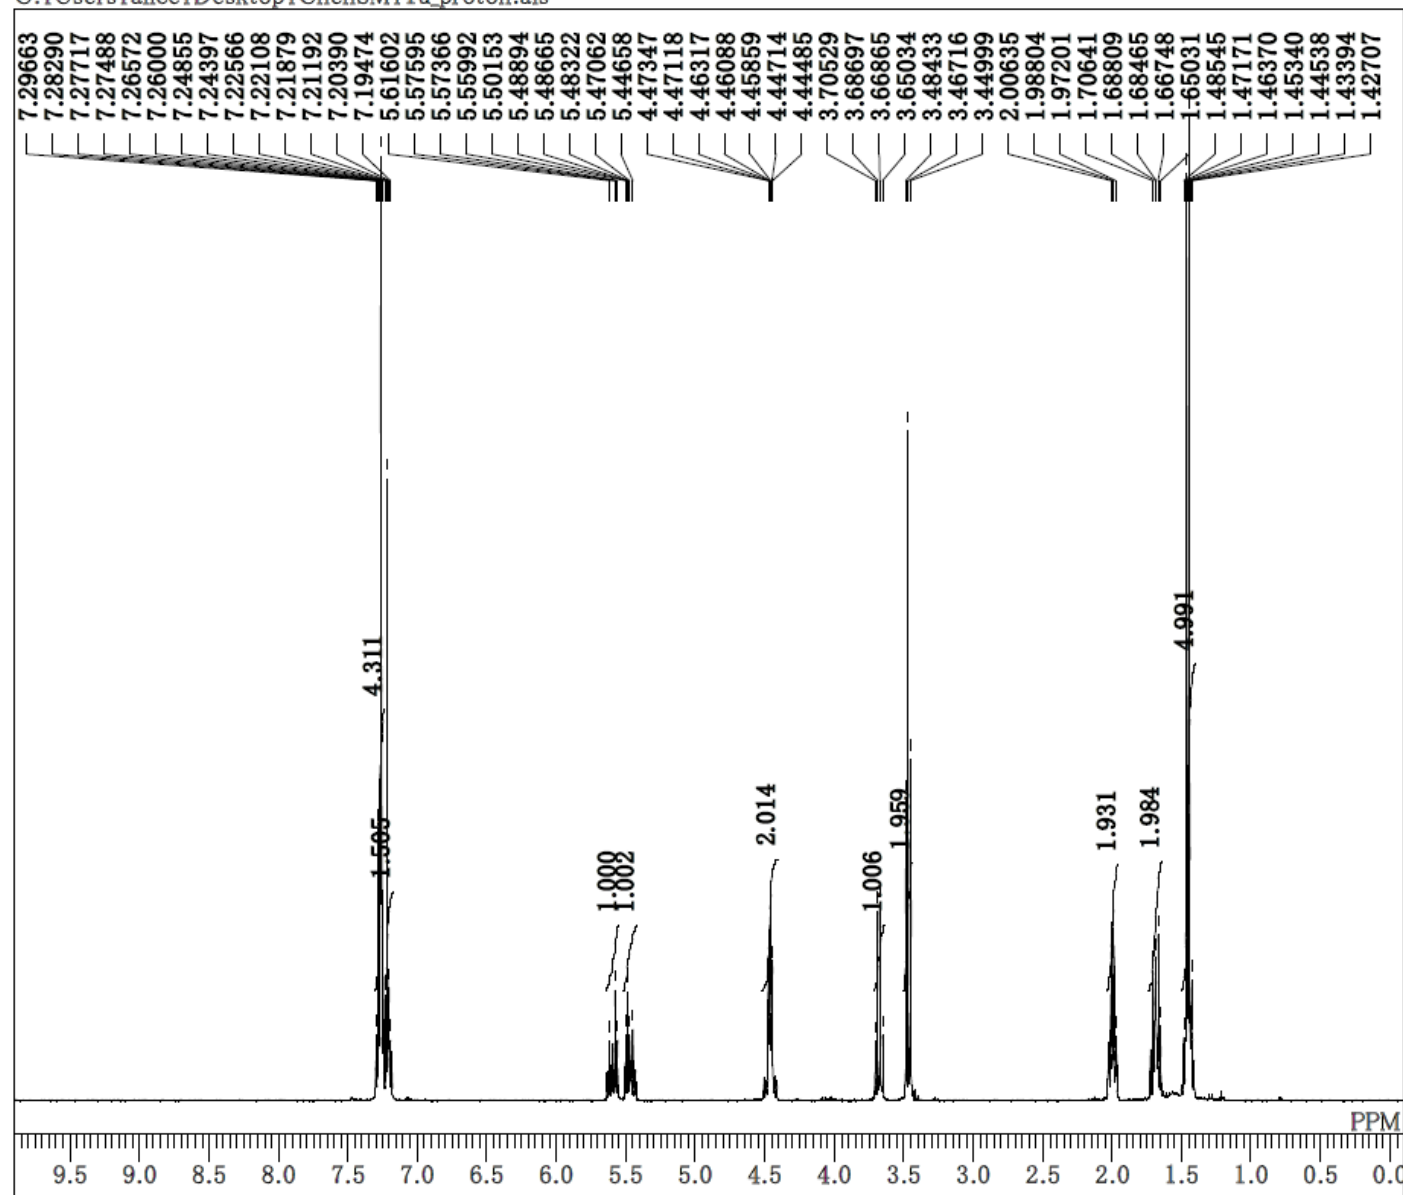

DFILE  
COMNT  
DATIM  
OBNUC  
EXMOD  
OBFRQ  
OBSET  
OBFIN  
POINT  
FREQU  
SCANS  
ACQTM  
PD  
PW1  
IRNUC  
CTEMP  
SLVNT  
EXREF  
BF  
RGAIN

1u\_proton.als  
24-03-2020 21:59:25  
1H  
proton.jxp  
391.78 MHz  
8.51 KHz  
3.34 Hz  
13107  
5878.90 Hz  
8  
2.2295 sec  
6.0000 sec  
5.17 usec  
1H  
20.3 c  
CDCL3  
7.26 ppm  
0.12 Hz  
42

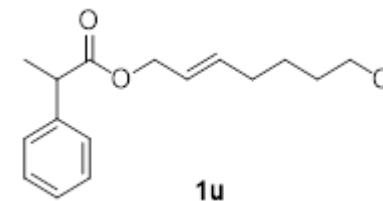

C:\Users\alice\Desktop\ChenSM\1u\_carbon.als

DFILE 1u\_carbon.als  
 COMNT  
 DATIM 24-03-2020 21:48:29  
 OBNUC <sup>13</sup>C  
 EXMOD carbon.jpg  
 OBFRQ 98.52 MHz  
 OBSET 4.64 KHz  
 OBFIN 8.74 Hz  
 POINT 26214  
 FREQU 24630.54 Hz  
 SCANS 184  
 ACQTM 1.0643 sec  
 PD 2.0000 sec  
 PW1 3.12 usec  
 IRNUC <sup>1</sup>H  
 CTEMP 20.5 c  
 SLVNT CDCL<sub>3</sub>  
 EXREF 77.00 ppm  
 BF 0.12 Hz  
 RGAIN 60

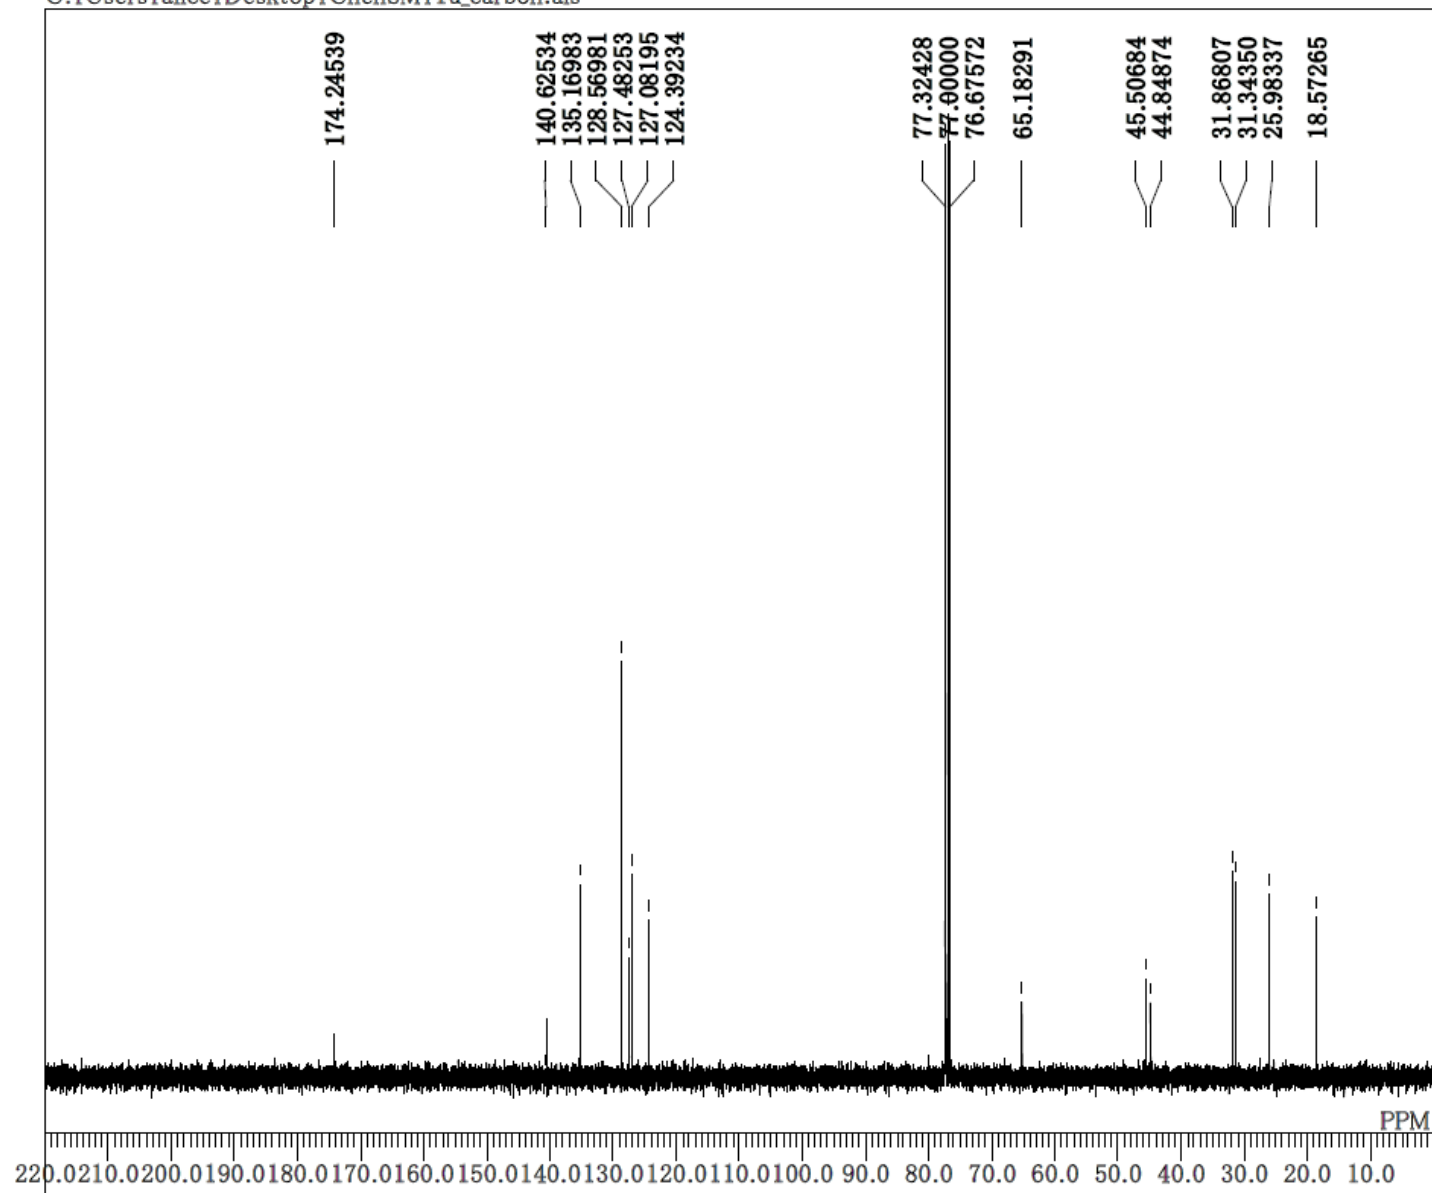

C:\Users\alice\Desktop\ChenSM\1v\_proton.als

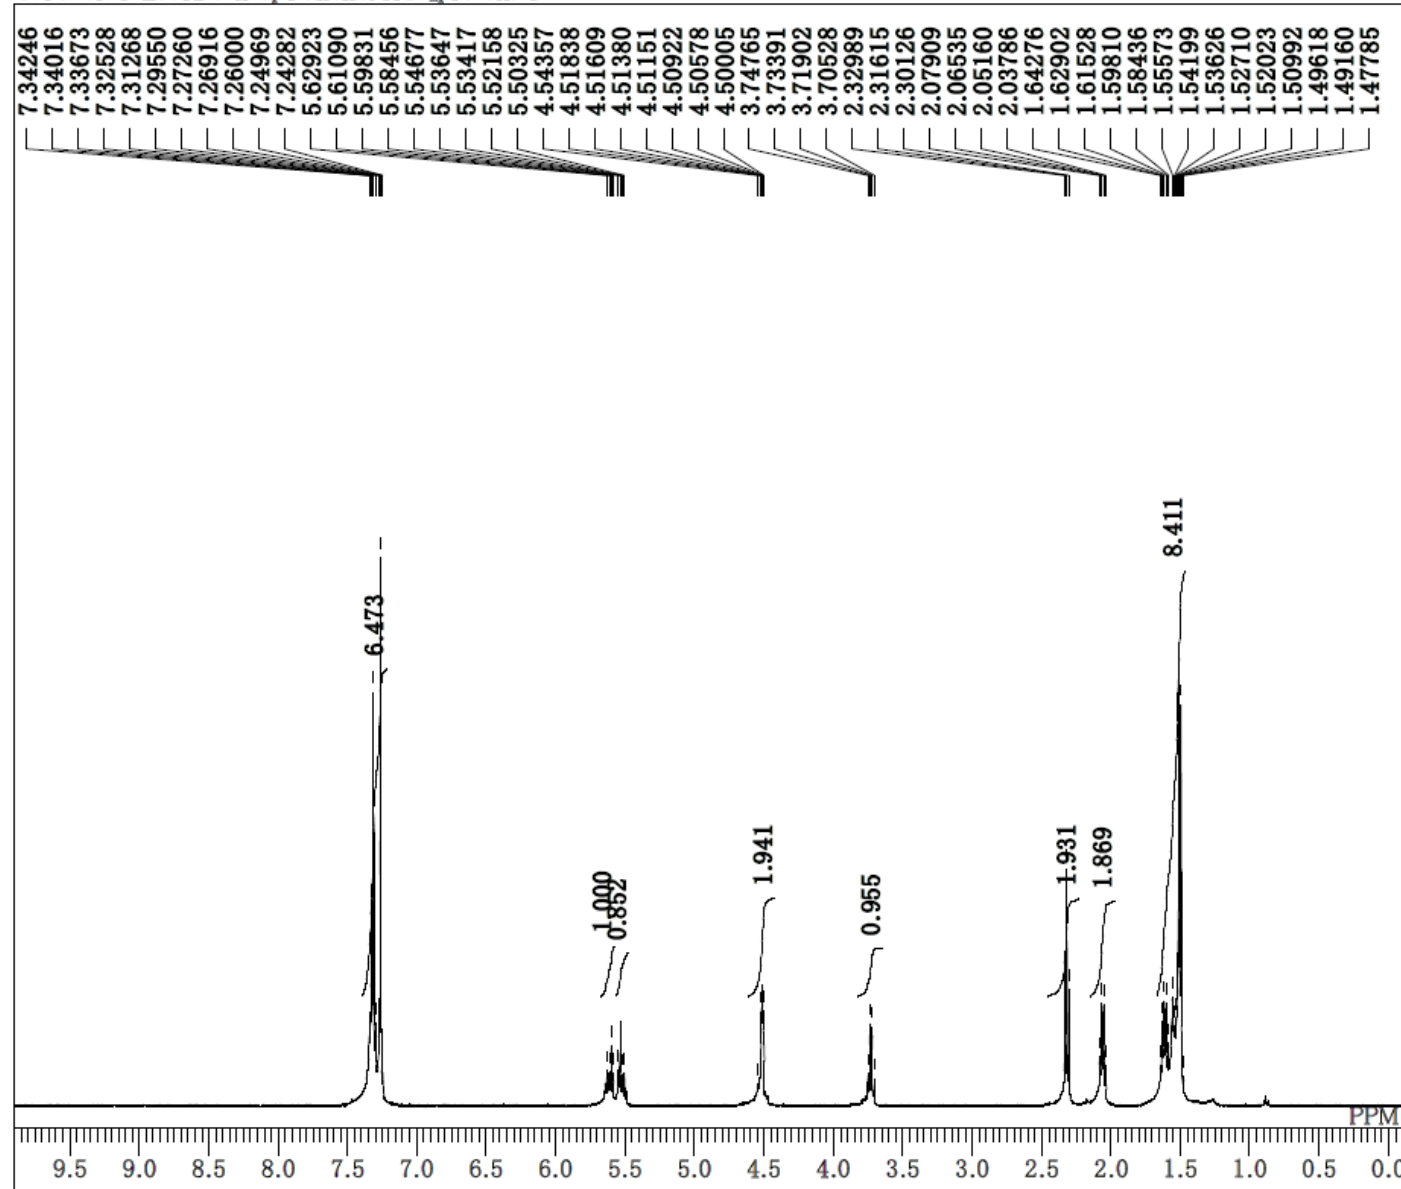

DFILE 1v\_proton.als  
 COMNT  
 DATIM 2019-07-01 11:17:52  
 OBNUC 1H  
 EXMOD proton.jxp  
 OBFRQ 500.16 MHz  
 OBSET 2.41 KHz  
 OBFIN 6.01 Hz  
 POINT 13107  
 FREQU 7507.51 Hz  
 SCANS 8  
 ACQTM 1.7459 sec  
 PD 6.0000 sec  
 PW1 5.55 usec  
 IRNUC 1H  
 CTEMP 21.8 c  
 SLVNT CDCL3  
 EXREF 7.26 ppm  
 BF 0.12 Hz  
 RGAIN 40

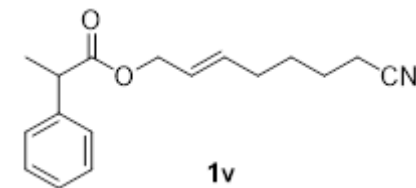



C:\Users\alice\Desktop\ChenSM\lv\_carbon.als

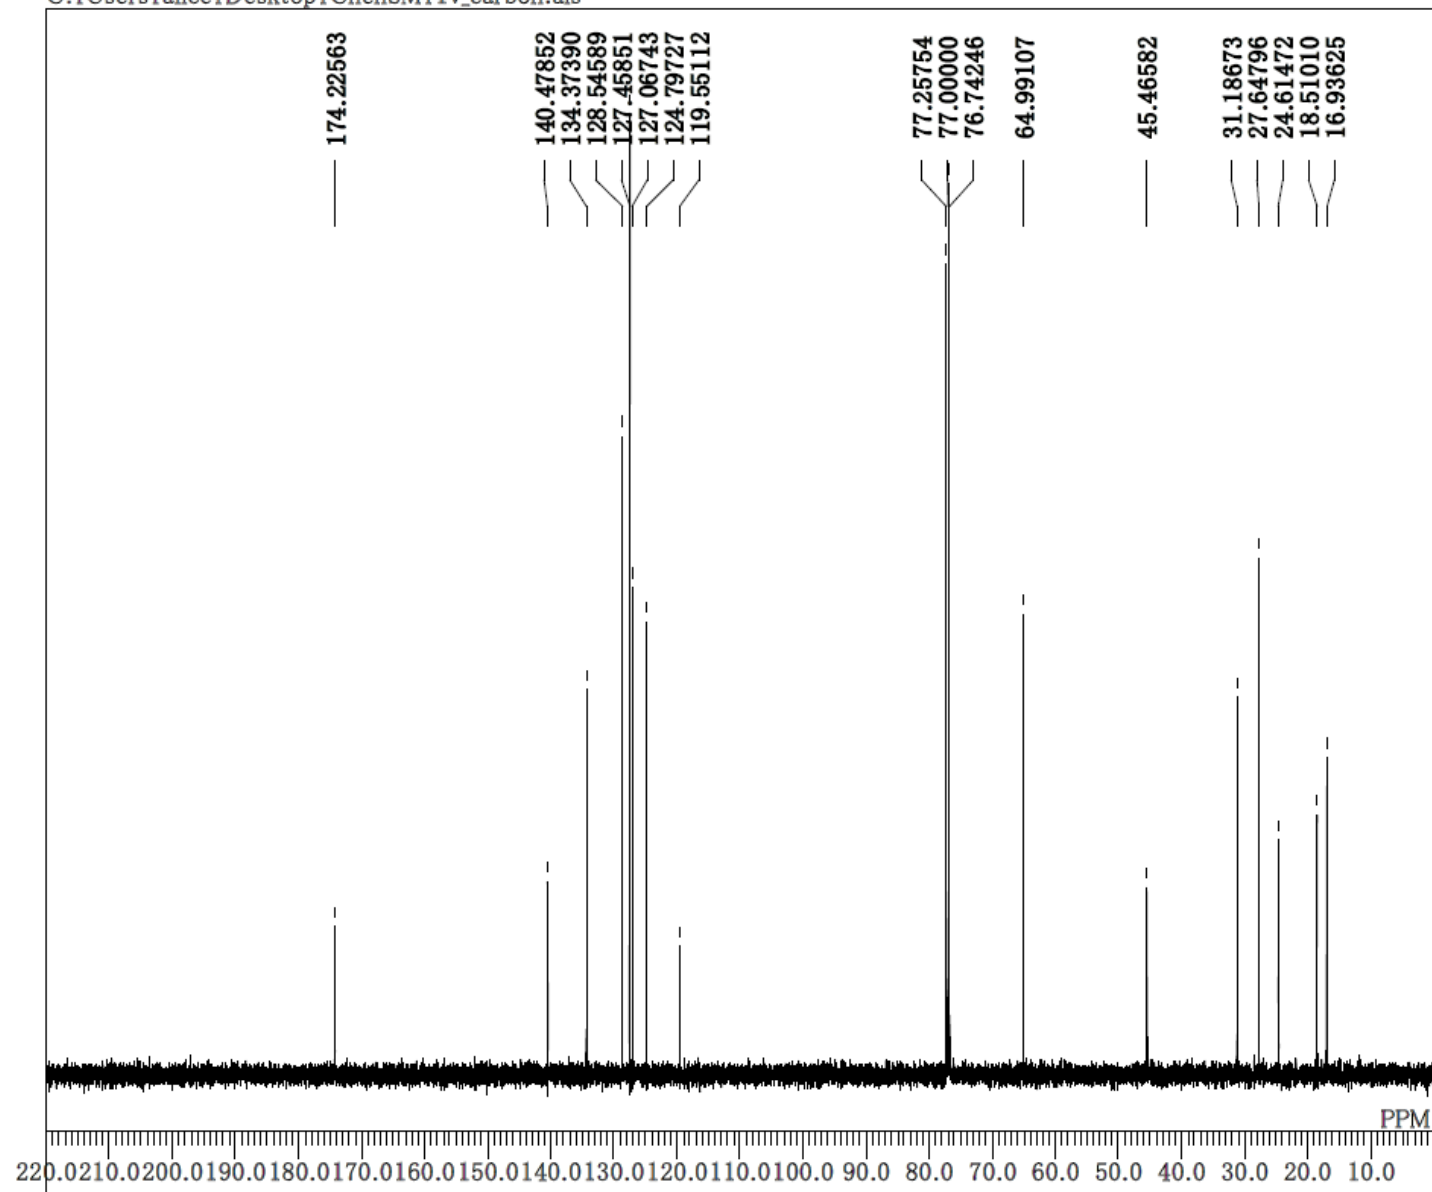

DFILE lv\_carbon.als  
COMNT  
DATIM 2019-07-01 11:23:12  
OBNUC 13C  
EXMOD carbon.jpg  
OBFRQ 125.77 MHz  
OBSET 7.87 KHz  
OBFIN 4.21 Hz  
POINT 26214  
FREQU 31446.54 Hz  
SCANS 141  
ACQTM 0.8336 sec  
PD 2.0000 sec  
PW1 3.40 usec  
IRNUC 1H  
CTEMP 22.0 c  
SLVNT CDCL3  
EXREF 77.00 ppm  
BF 0.12 Hz  
RGAIN 60

C:\Users\Valice\Desktop\ChenSM\1w\_proton.als

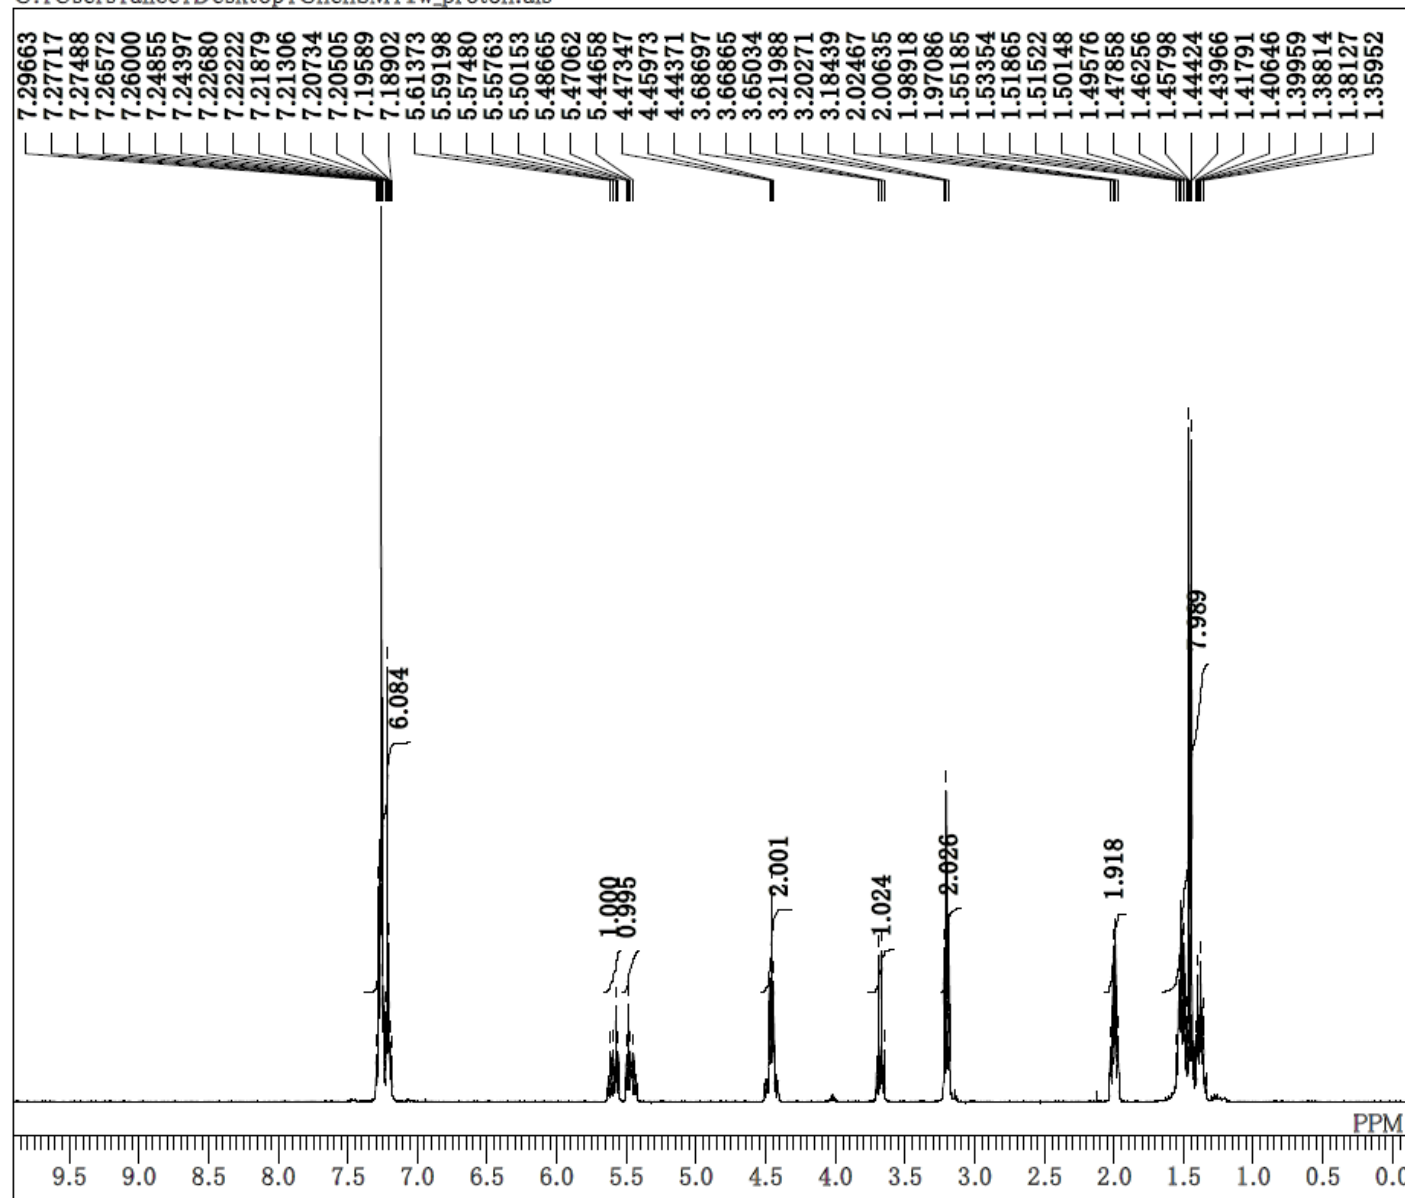

DFILE 1w\_proton.als  
 COMNT  
 DATIM 09-11-2019 13:14:13  
 OBNUC 1H  
 EXMOD proton.jxp  
 OBFRQ 391.78 MHz  
 OBSET 8.51 KHz  
 OBFIN 3.34 Hz  
 POINT 13107  
 FREQU 5878.90 Hz  
 SCANS 8  
 ACQTM 2.2295 sec  
 PD 6.0000 sec  
 PW1 5.17 usec  
 IRNUC 1H  
 CTEMP 20.4 c  
 SLVNT CDCL3  
 EXREF 7.26 ppm  
 BF 0.12 Hz  
 RGAIN 44

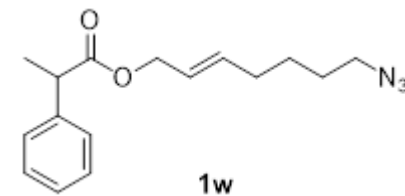

C:\Users\alice\Desktop\ChenSM\lw\_carbon.als

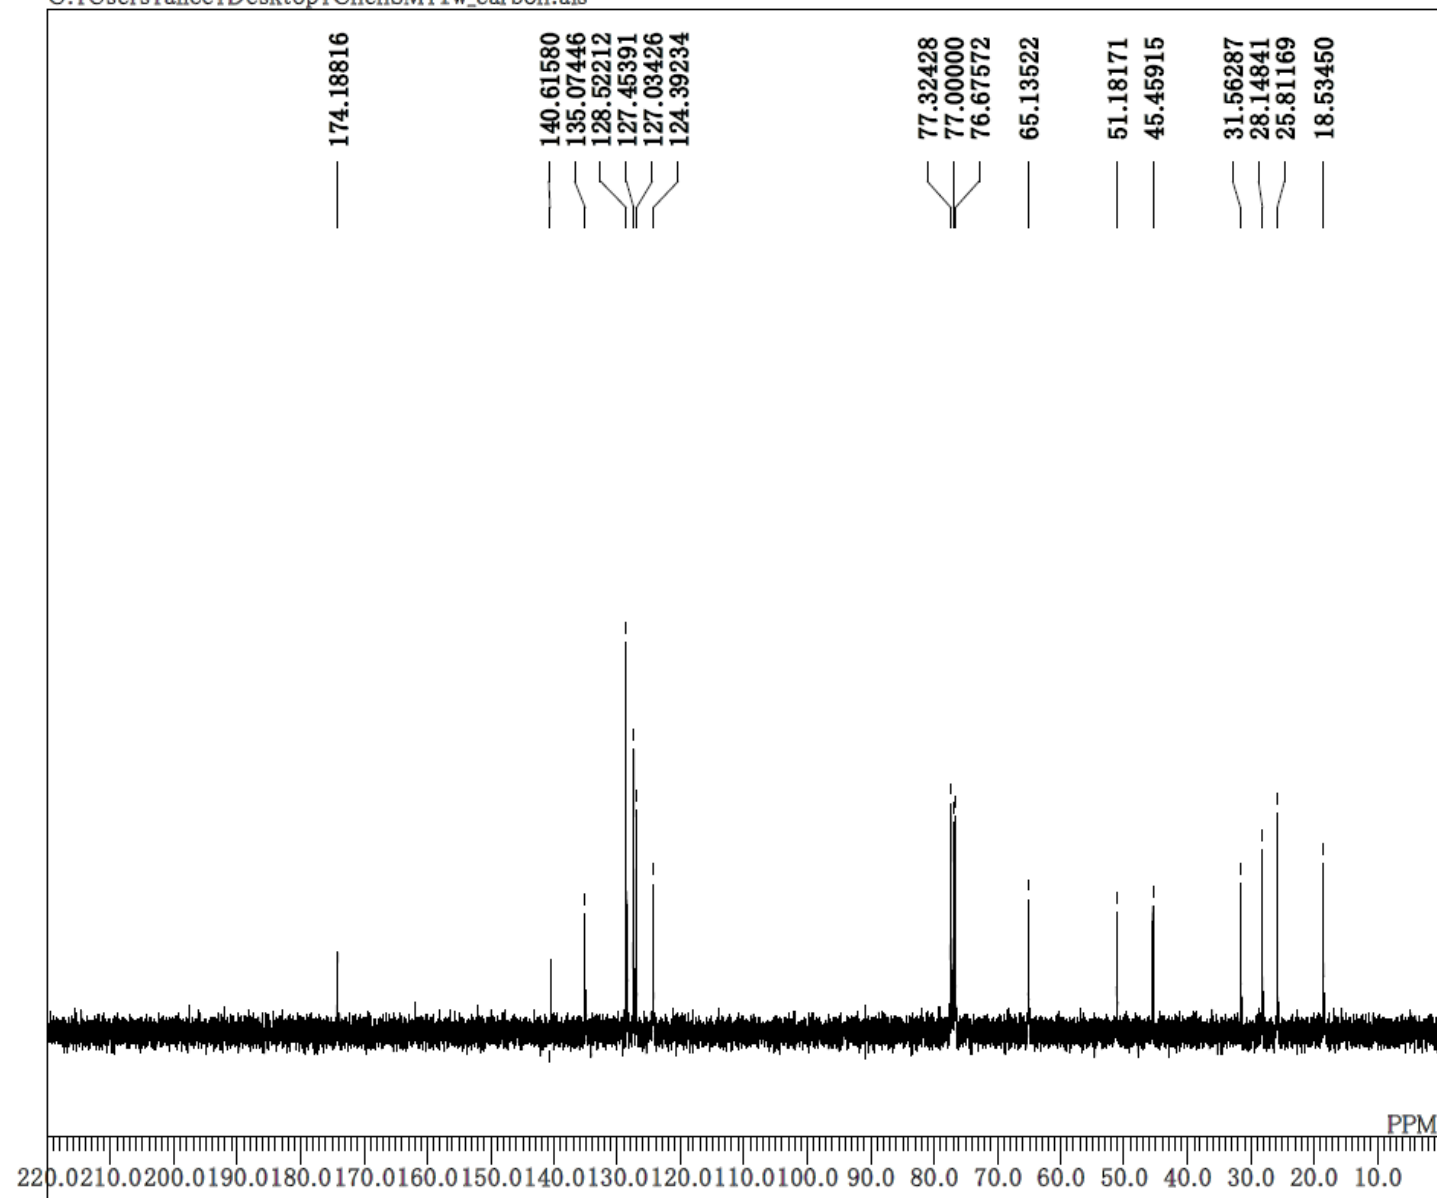

DFILE lw\_carbon.als  
 COMNT  
 DATIM 09-11-2019 13:34:11  
 OBNUC 13C  
 EXMOD carbon.jxp  
 OBFRQ 98.52 MHz  
 OBSET 4.64 KHz  
 OBFIN 8.74 Hz  
 POINT 26214  
 FREQU 24630.54 Hz  
 SCANS 61  
 ACQTM 1.0643 sec  
 PD 2.0000 sec  
 PW1 3.12 usec  
 IRNUC 1H  
 CTEMP 20.6 c  
 SLVNT CDCL3  
 EXREF 77.00 ppm  
 BF 0.12 Hz  
 RGAIN 60

C:\Users\alice\Desktop\ChenSM\1x\_proton.als

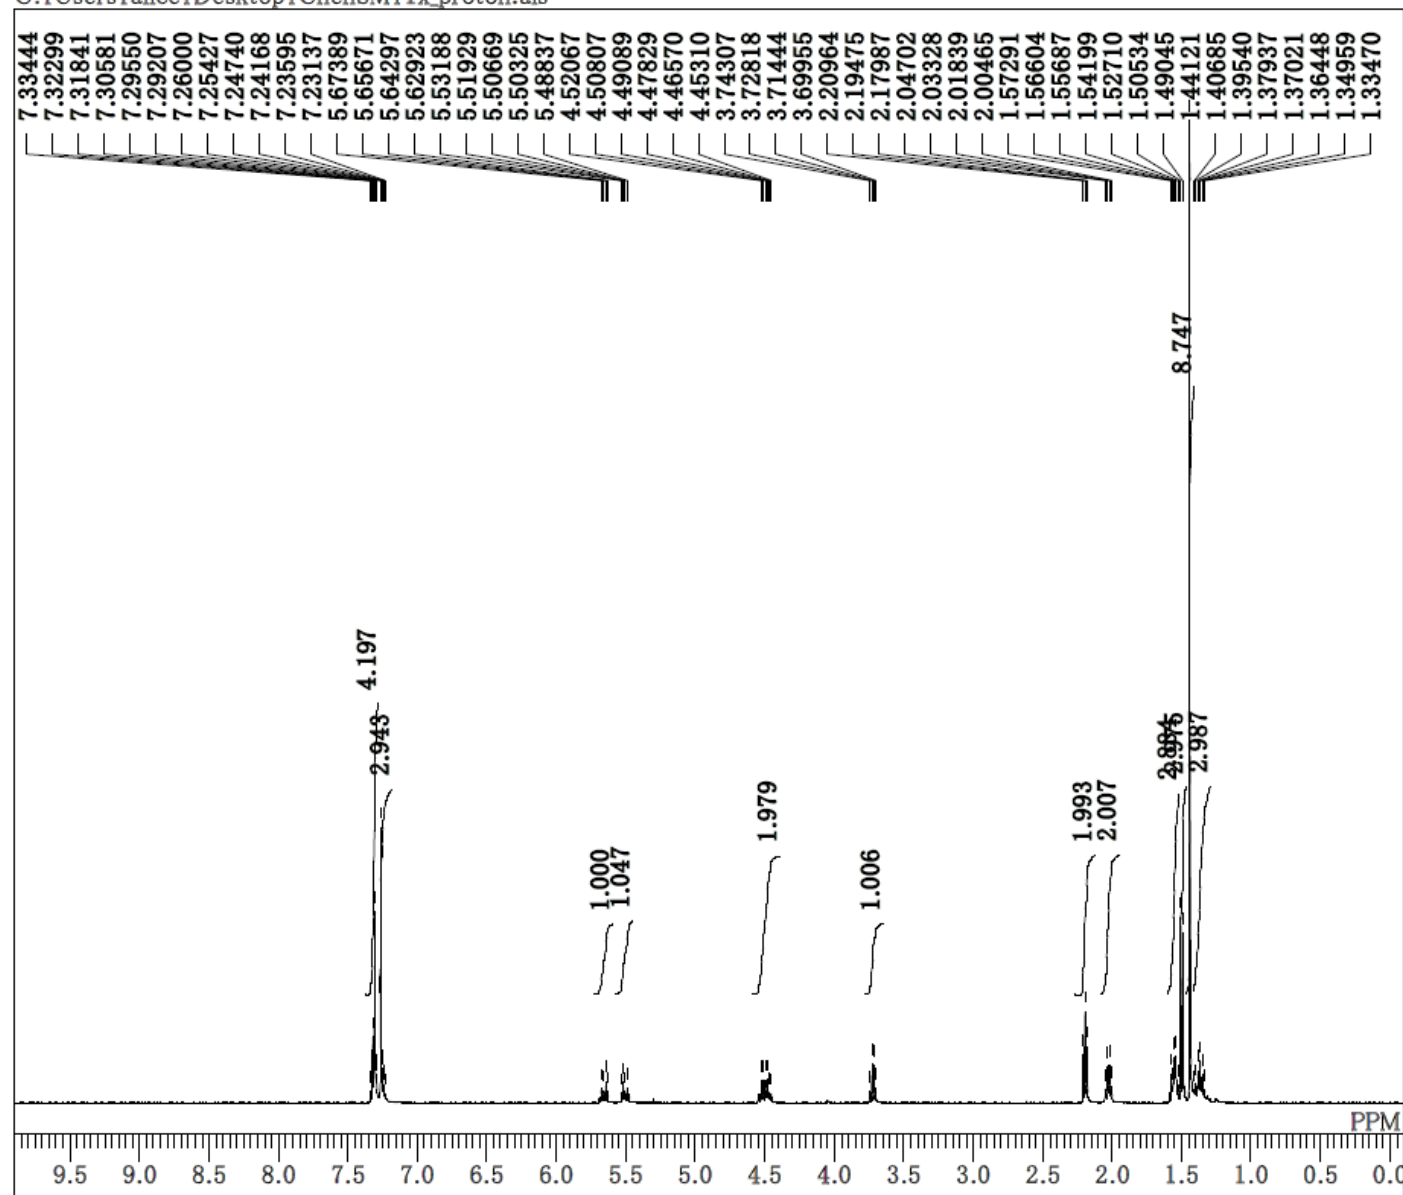

DFILE 1x\_proton.als  
 COMNT  
 DATIM 2019-11-13 21:36:14  
 OBNUC 1H  
 EXMOD proton.jxp  
 OBFRQ 500.16 MHz  
 OBSET 2.41 KHz  
 OBFIN 6.01 Hz  
 POINT 13107  
 FREQU 7507.51 Hz  
 SCANS 8  
 ACQTM 1.7459 sec  
 PD 6.0000 sec  
 PW1 5.55 usec  
 IRNUC 1H  
 CTEMP 21.5 c  
 SLVNT CDCL3  
 EXREF 7.26 ppm  
 BF 0.12 Hz  
 RGAIN 42

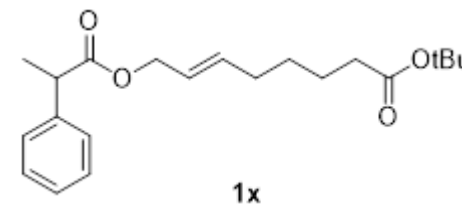

C:\Users\Valice\Desktop\ChenSM\1x\_carbon.als

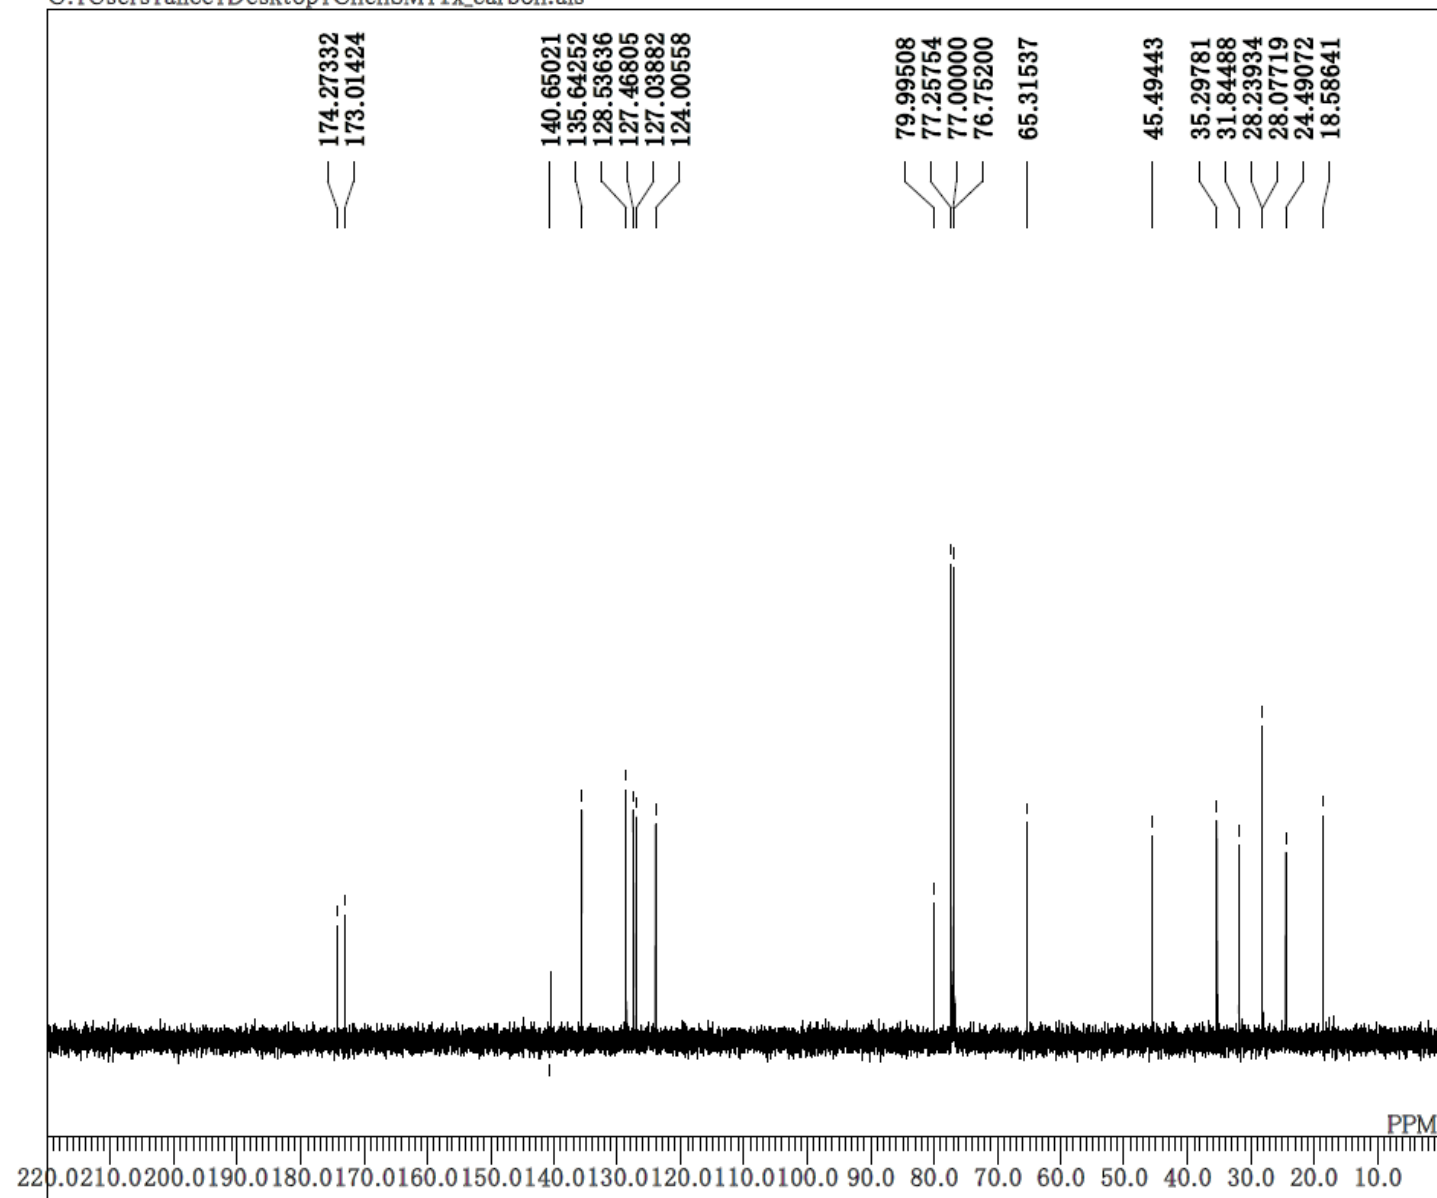

DFILE 1x\_carbon.als  
 COMNT  
 DATIM 2019-11-13 21:47:22  
 OBNUC 13C  
 EXMOD carbon.jpg  
 OBFRQ 125.77 MHz  
 OBSET 7.87 KHz  
 OBFIN 4.21 Hz  
 POINT 26214  
 FREQU 31446.54 Hz  
 SCANS 40  
 ACQTM 0.8336 sec  
 PD 2.0000 sec  
 PW1 3.40 usec  
 IRNUC 1H  
 CTEMP 20.6 c  
 SLVNT CDCL3  
 EXREF 77.00 ppm  
 BF 0.12 Hz  
 RGAIN 60

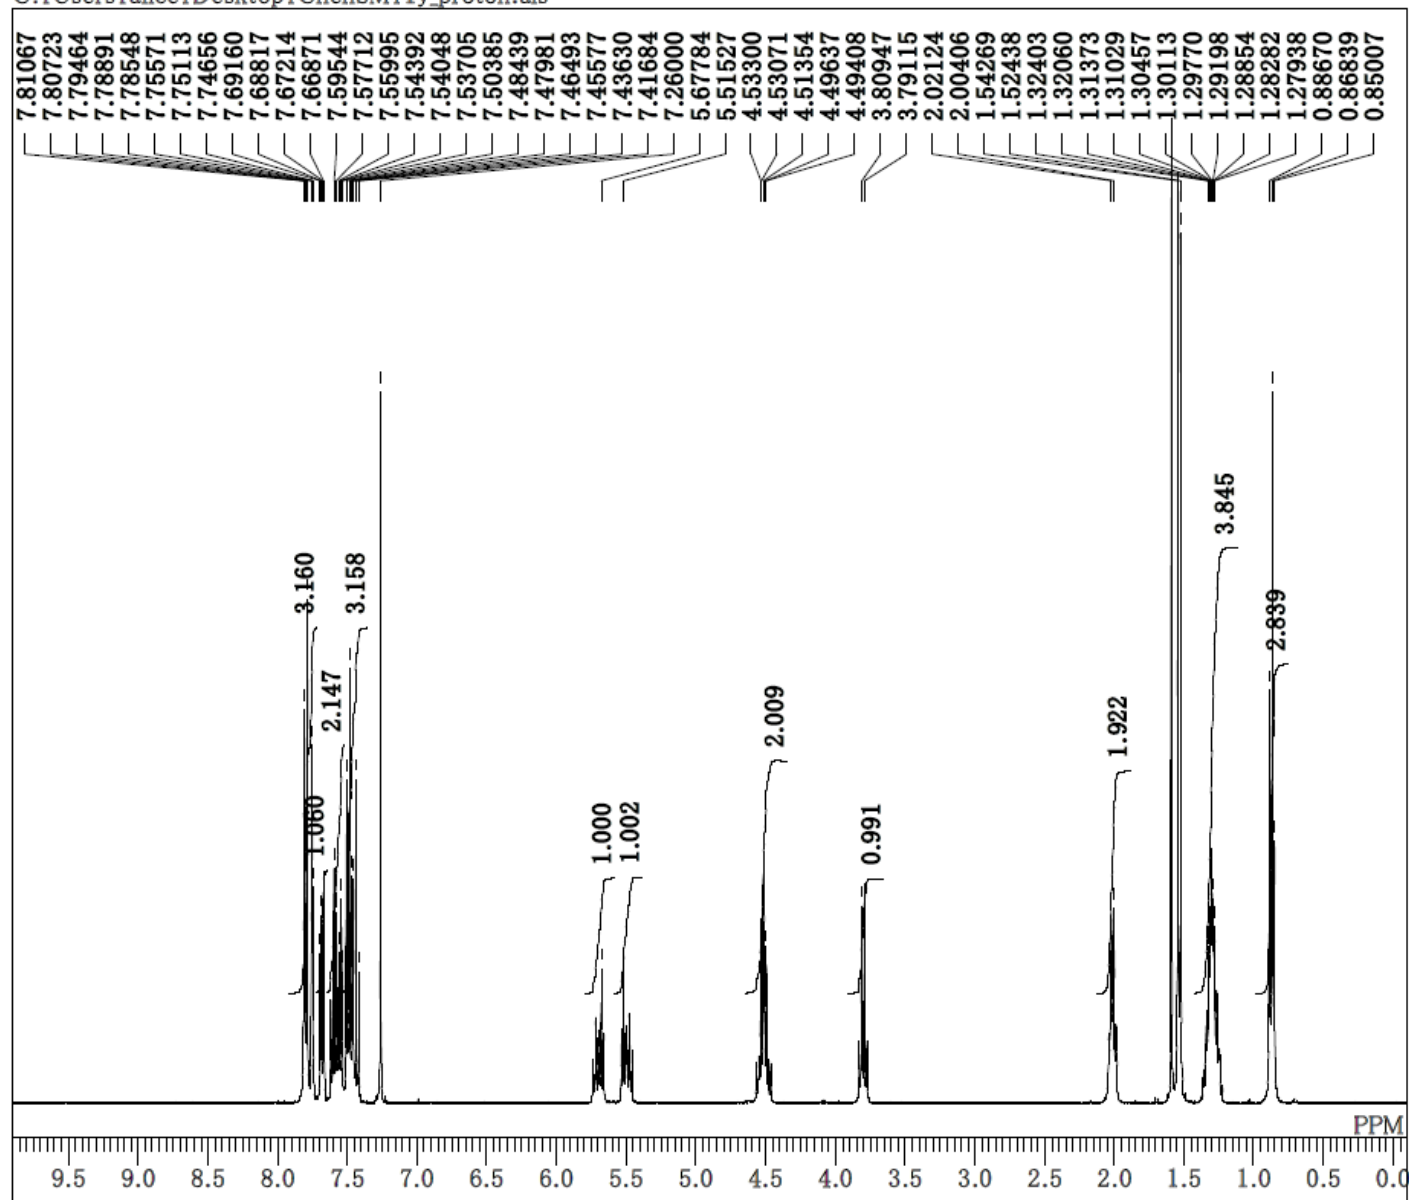

DFILE 1y\_proton.als  
 COMNT  
 DATIM 27-07-2019 16:04:49  
 OBNUC 1H  
 EXMOD proton.jxp  
 OBFRQ 391.78 MHz  
 OBSET 8.51 KHz  
 OBFIN 3.34 Hz  
 POINT 13107  
 FREQU 5878.90 Hz  
 SCANS 8  
 ACQTM 2.2295 sec  
 PD 6.0000 sec  
 PW1 5.17 usec  
 IRNUC 1H  
 CTEMP 20.9 c  
 SLVNT CDCL3  
 EXREF 7.26 ppm  
 BF 0.12 Hz  
 RGAIN 40

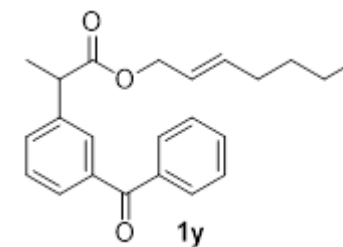

C:\Users\Valice\Desktop\ChenSM\1y\_carbon.als

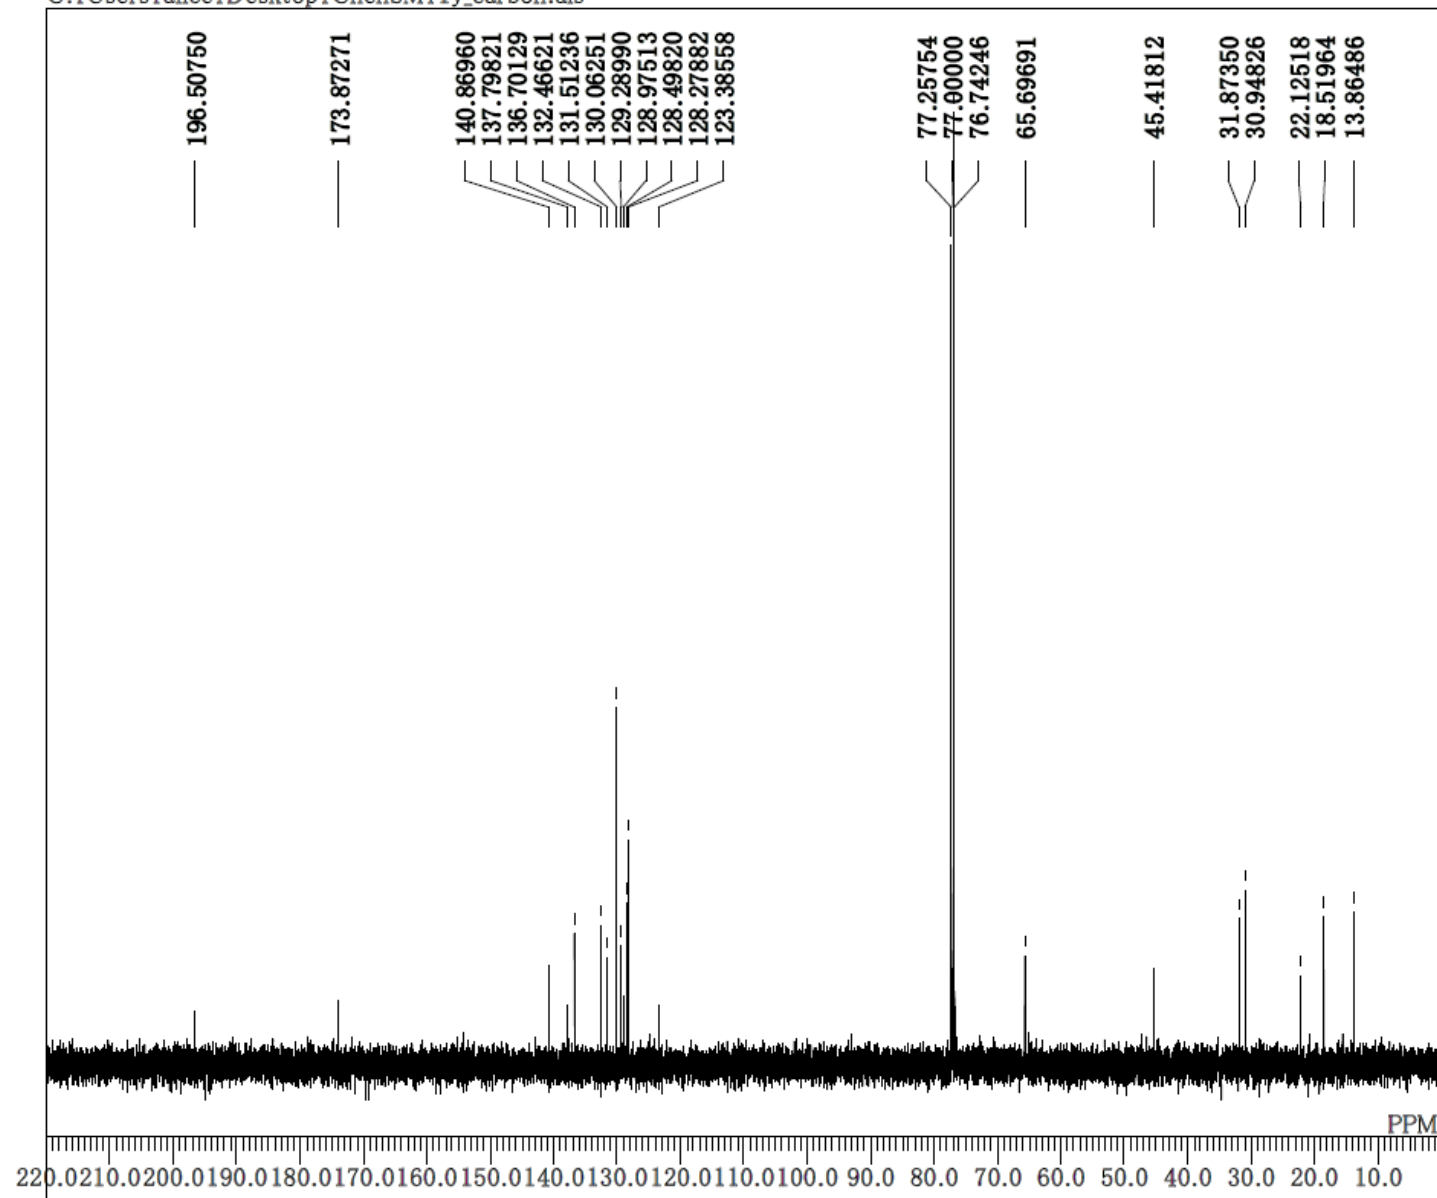

DFILE 1y\_carbon.als  
 COMNT  
 DATIM 2019-07-27 16:32:18  
 OBNUC 13C  
 EXMOD carbon.jxp  
 OBFRQ 125.77 MHz  
 OBSET 7.87 KHz  
 OBFIN 4.21 Hz  
 POINT 26214  
 FREQU 31446.54 Hz  
 SCANS 60  
 ACQTM 0.8336 sec  
 PD 2.0000 sec  
 PW1 3.40 usec  
 IRNUC 1H  
 CTEMP 22.0 c  
 SLVNT CDCL3  
 EXREF 77.00 ppm  
 BF 0.12 Hz  
 RGAIN 60

C:\Users\valice\Desktop\Gousei\Chen\Chen\_SM2\1z\_proton.als

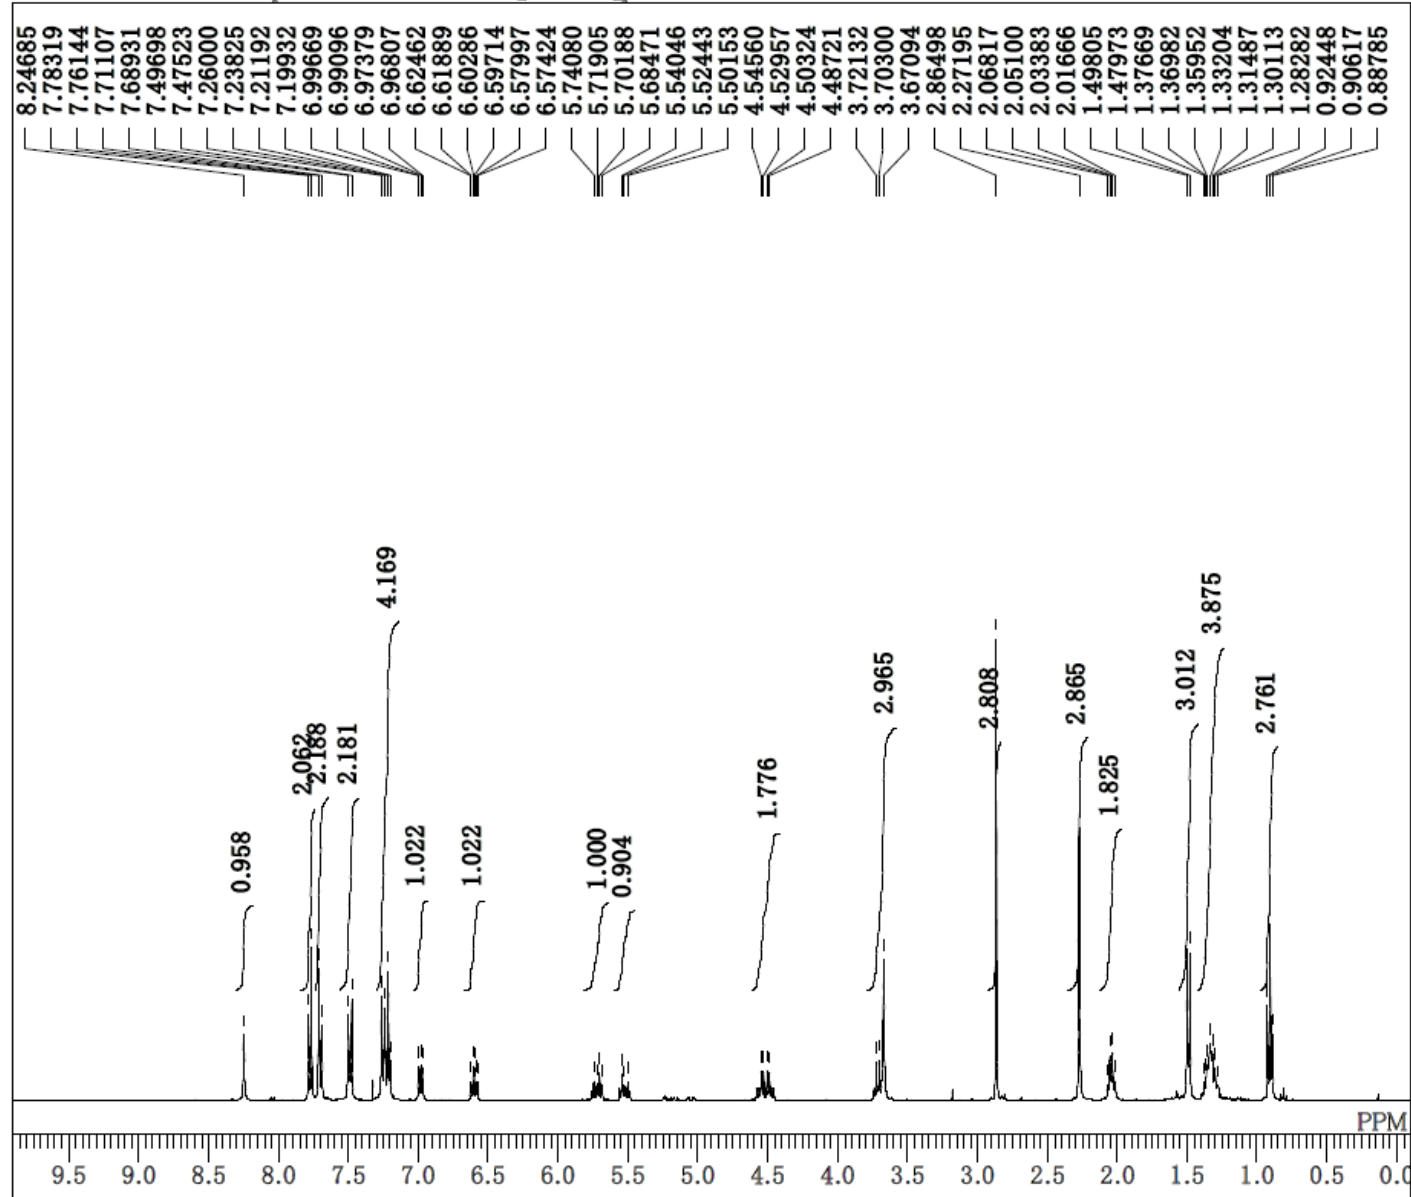

DFILE 1z\_proton.als  
 COMNT  
 DATIM 30-10-2020 20:30:50  
 OBNUC 1H  
 EXMOD proton.jxp  
 OBFRQ 391.78 MHz  
 OBSET 8.51 KHz  
 OBFIN 3.34 Hz  
 POINT 13107  
 FREQU 5878.90 Hz  
 SCANS 8  
 ACQTM 2.2295 sec  
 PD 6.0000 sec  
 PW1 5.17 usec  
 IRNUC 1H  
 CTEMP 21.1 c  
 SLVNT CDCL3  
 EXREF 7.26 ppm  
 BF 0.12 Hz  
 RGAIN 22

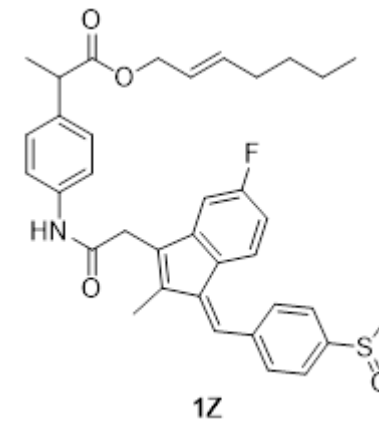



C:\Users\alice\Desktop\Gousei\Chen\Chen\_SM2\1z\_carbon.als

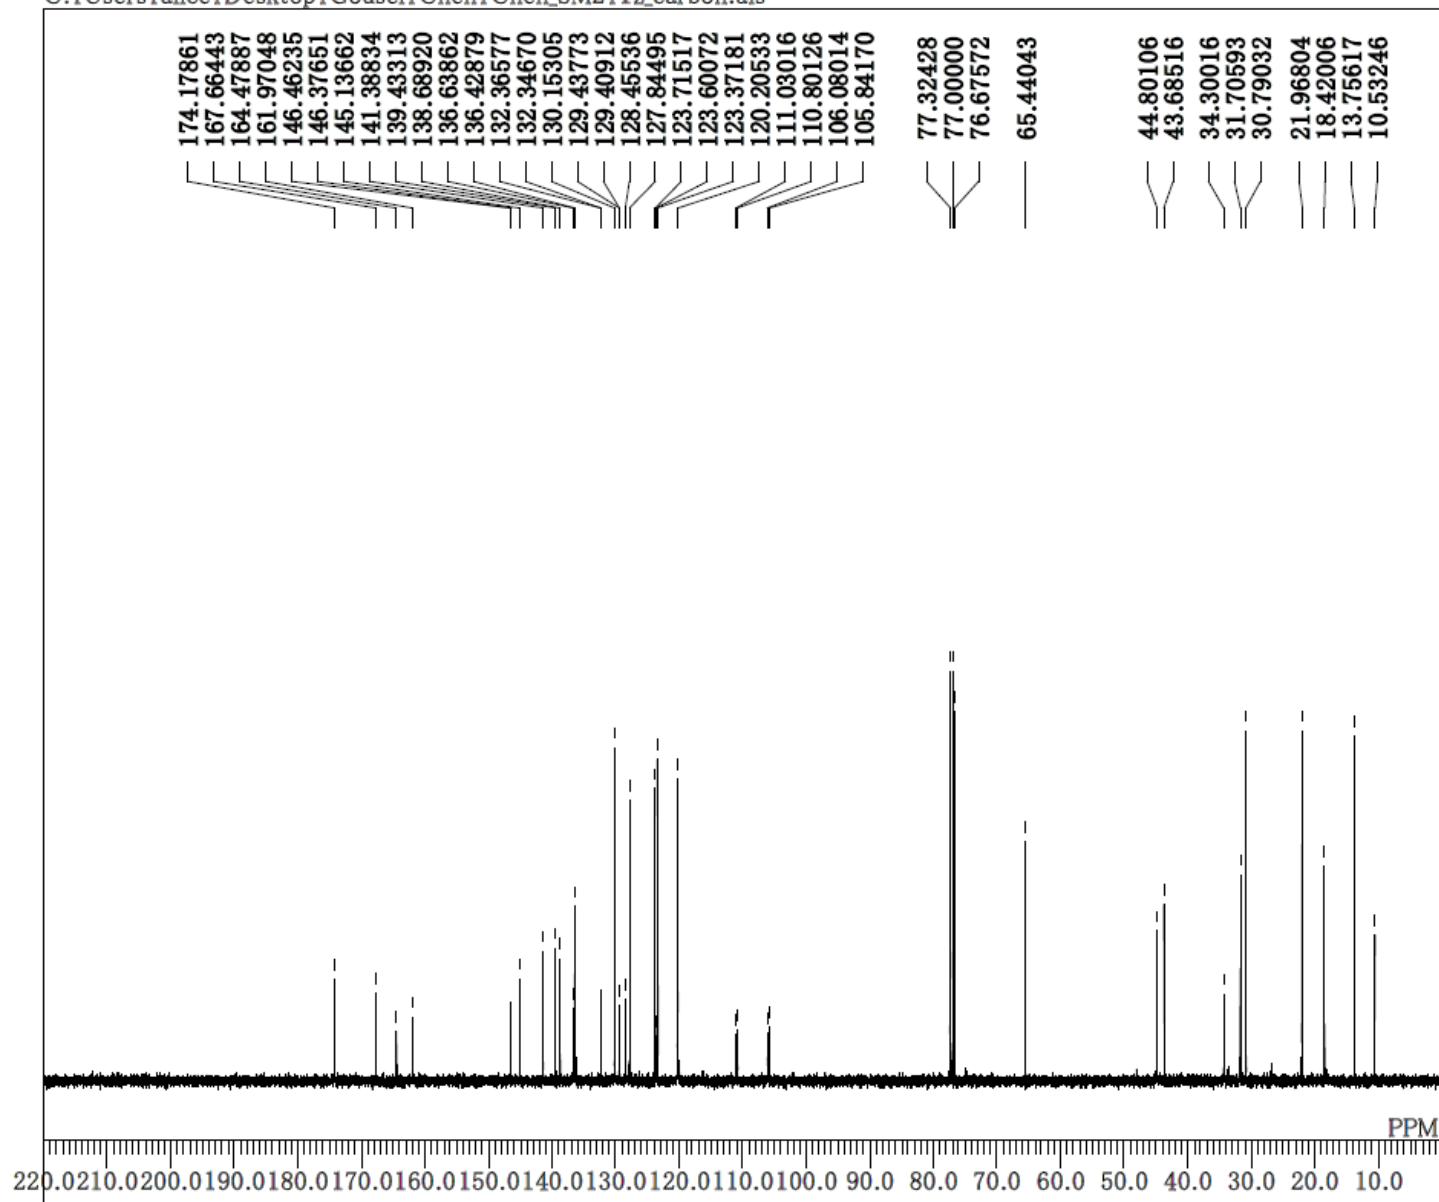

DFILE 1z\_carbon.als  
 COMNT  
 DATIM 30-10-2020 20:32:54  
 OBNUC 13C  
 EXMOD carbon.jxp  
 OBFRQ 98.52 MHz  
 OBSET 4.64 KHz  
 OBFIN 8.74 Hz  
 POINT 26214  
 FREQU 24630.54 Hz  
 SCANS 213  
 ACQTM 1.0643 sec  
 PD 2.0000 sec  
 PW1 3.12 usec  
 IRNUC 1H  
 CTEMP 21.3 c  
 SLVNT CDCL3  
 EXREF 77.00 ppm  
 BF 0.12 Hz  
 RGAIN 60

I:\sulundac F\ sulindac\_SM\_F-1-1.als

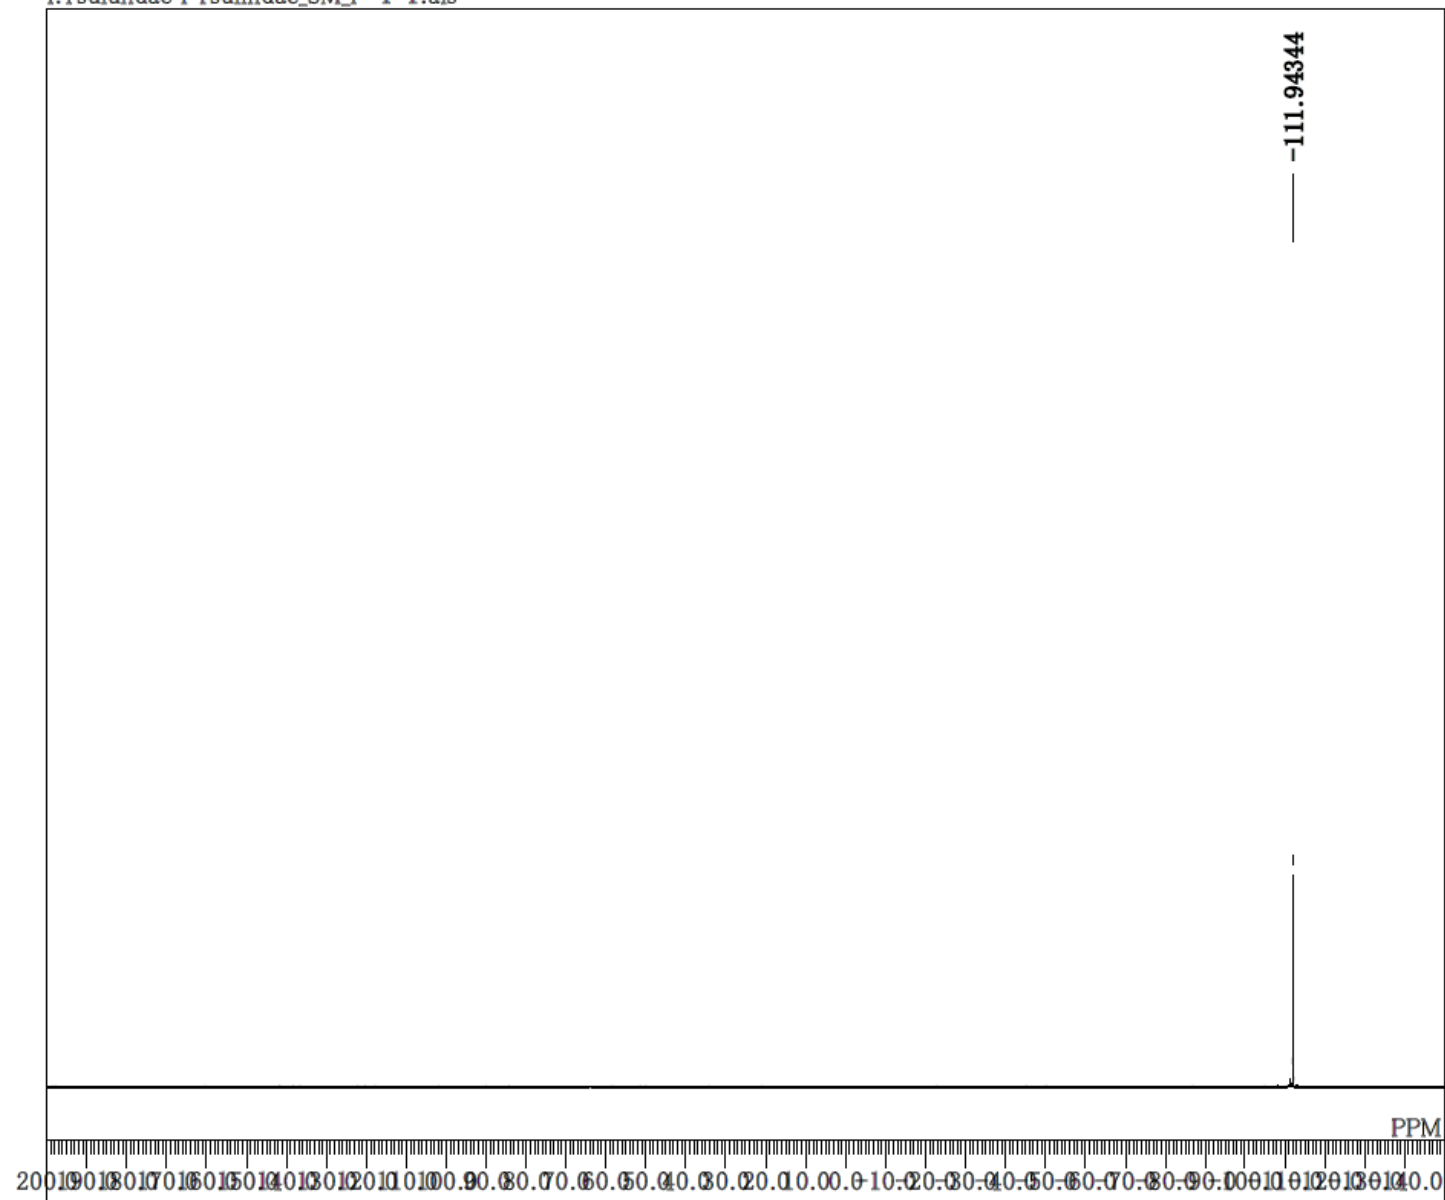

|       |                       |
|-------|-----------------------|
| DFILE | sulindac_SM_F-1-1.als |
| COMNT |                       |
| DATIM | 14-11-2020 09:10:58   |
| OBNUC | 19F                   |
| EXMOD | proton.jxp            |
| OBFRQ | 368.64 MHz            |
| OBSET | 7.63 KHz              |
| OBFIN | 2.85 Hz               |
| POINT | 13107                 |
| FREQU | 149253.73 Hz          |
| SCANS | 100                   |
| ACQTM | 0.0878 sec            |
| PD    | 6.0000 sec            |
| PW1   | 4.10 usec             |
| IRNUC | 19F                   |
| CTEMP | 20.5 c                |
| SLVNT | CDCL3                 |
| EXREF | 0.00 ppm              |
| BF    | 1.00 Hz               |
| RGAIN | 50                    |

C:\Users\alice\Desktop\Gousei\Chen\Chen\_SM2\1aa\_proton.als

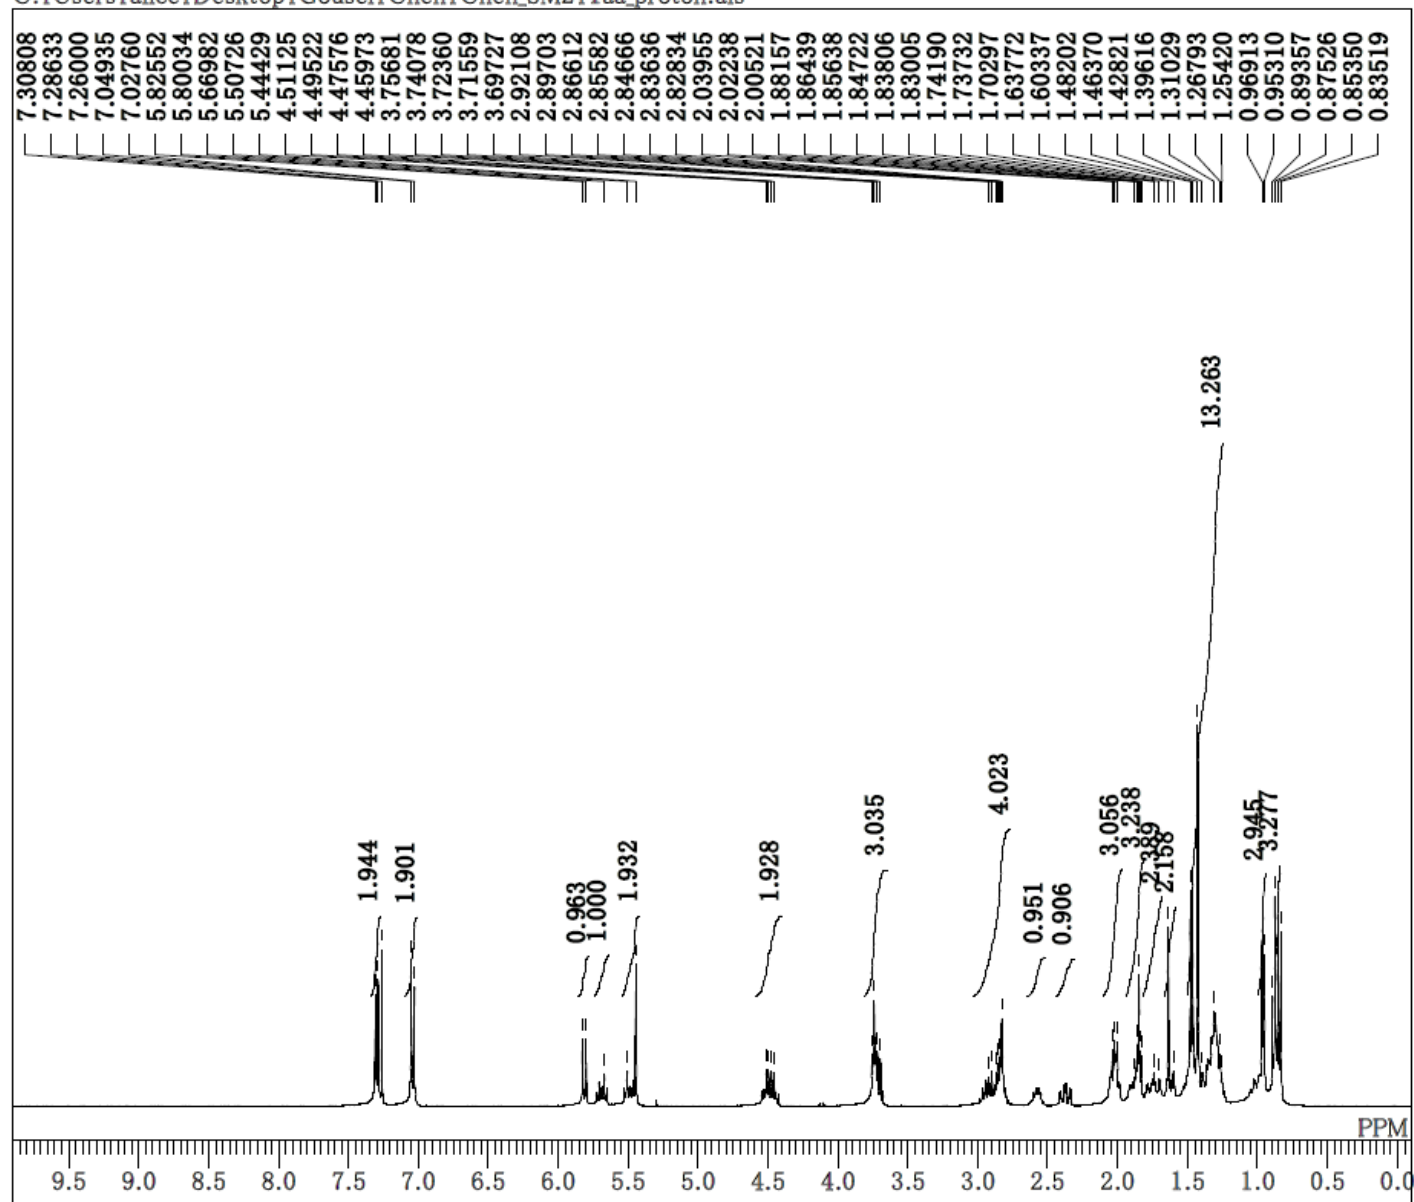

DFILE 1aa\_proton.als  
 COMNT  
 DATIM 10-10-2020 15:15:57  
 OBNUC 1H  
 EXMOD proton.jxp  
 OBFRQ 391.78 MHz  
 OBSET 8.51 KHz  
 OBFIN 3.34 Hz  
 POINT 13107  
 FREQU 5878.90 Hz  
 SCANS 8  
 ACQTM 2.2295 sec  
 PD 6.0000 sec  
 PW1 5.17 usec  
 IRNUC 1H  
 CTEMP 21.0 c  
 SLVNT CDCL3  
 EXREF 7.26 ppm  
 BF 0.12 Hz  
 RGAIN 34

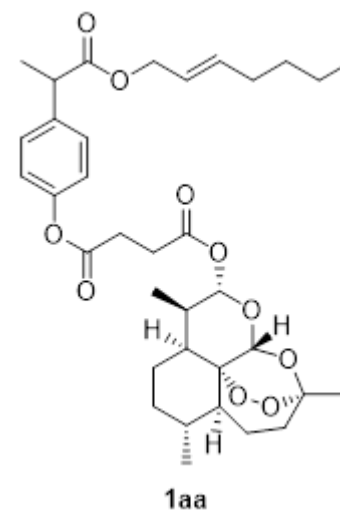

C:\Users\alice\Desktop\Gousei\Chen\Chen\_SM2\1aa\_carbon.als

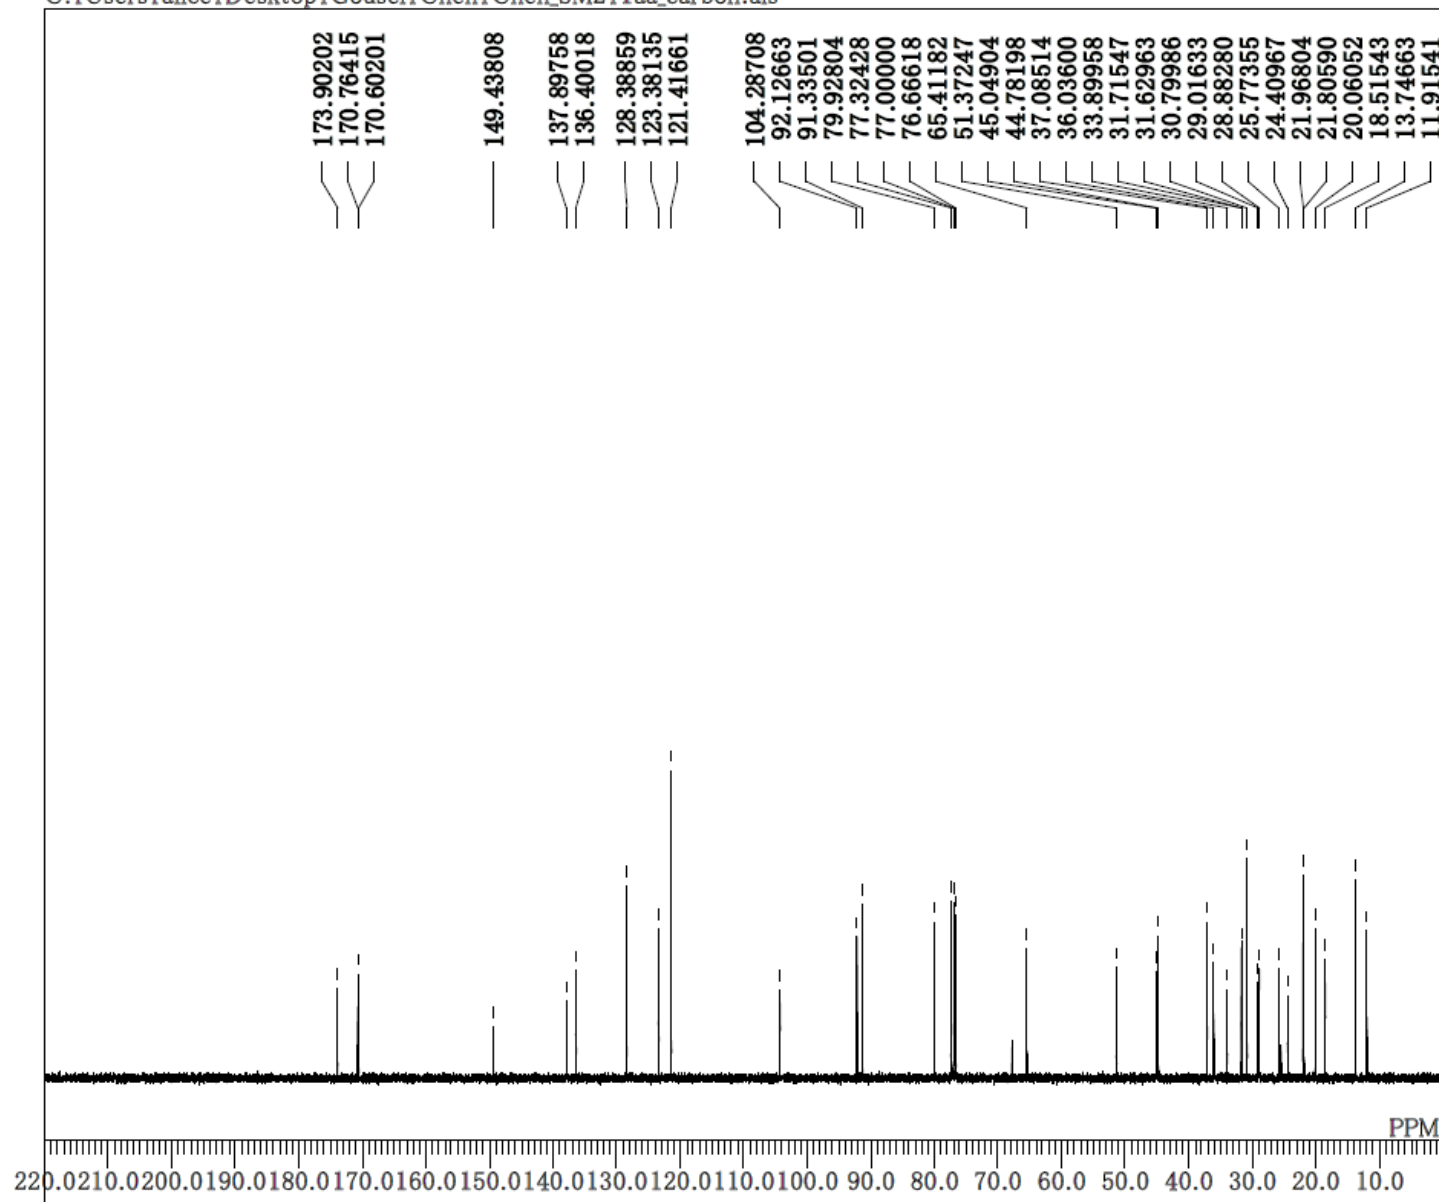

DFILE 1aa\_carbon.als  
 COMNT  
 DATIM 12-10-2020 17:35:14  
 OBNUC 13C  
 EXMOD carbon.jxp  
 OBFRQ 98.52 MHz  
 OBSET 4.64 KHz  
 OBFIN 8.74 Hz  
 POINT 26214  
 FREQU 24630.54 Hz  
 SCANS 134  
 ACQTM 1.0643 sec  
 PD 2.0000 sec  
 PW1 3.12 usec  
 IRNUC 1H  
 CTEMP 21.2 c  
 SLVNT CDCL3  
 EXREF 77.00 ppm  
 BF 0.12 Hz  
 RGAIN 60

C:\Users\alice\Desktop\ChenSM\1z\_proton.als

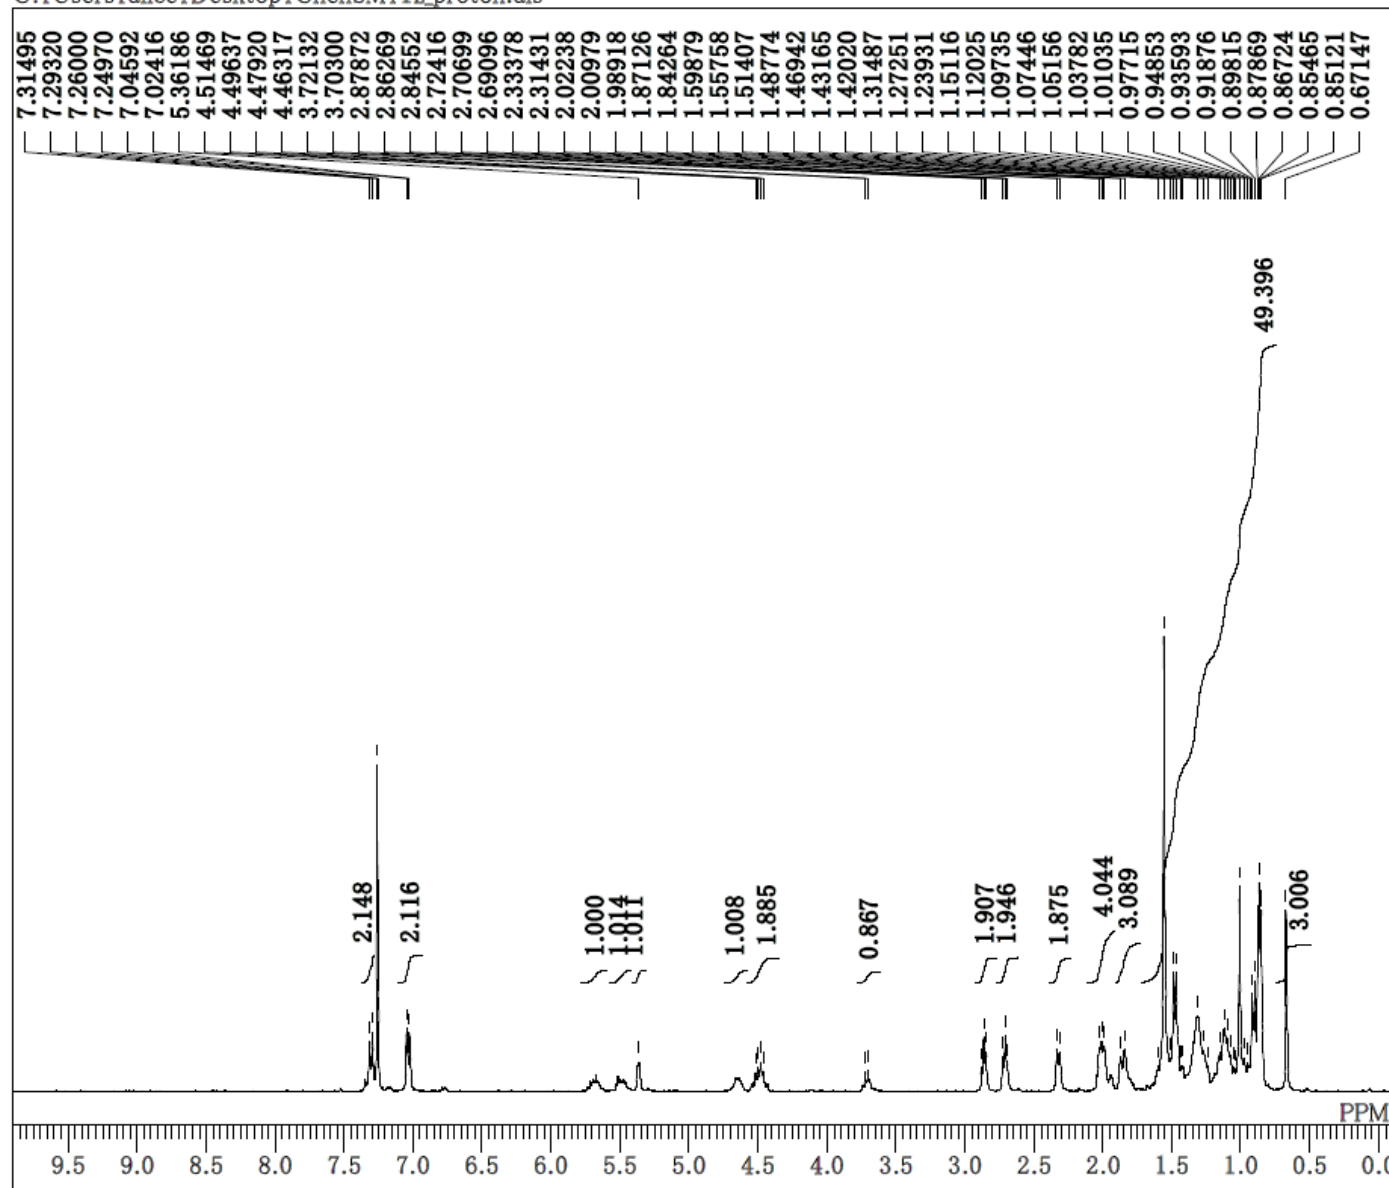

DFILE 1z\_proton.als  
 COMNT 10-12-2019 19:19:18  
 DATIM  
 OBNUC 1H  
 EXMOD proton.jxp  
 OBFRQ 391.78 MHz  
 OBSET 8.51 KHz  
 OBFIN 3.34 Hz  
 POINT 13107  
 FREQU 5878.90 Hz  
 SCANS 8  
 ACQTM 2.2295 sec  
 PD 6.0000 sec  
 PW1 5.17 usec  
 IRNUC 1H  
 CTEMP 20.2 c  
 SLVNT CDCL3  
 EXREF 7.26 ppm  
 BF 1.20 Hz  
 RGAIN 48

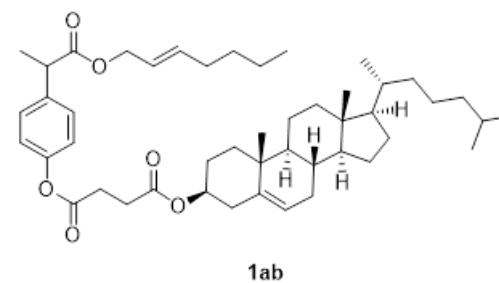

I:\ChenSM\1z\_carbon.als

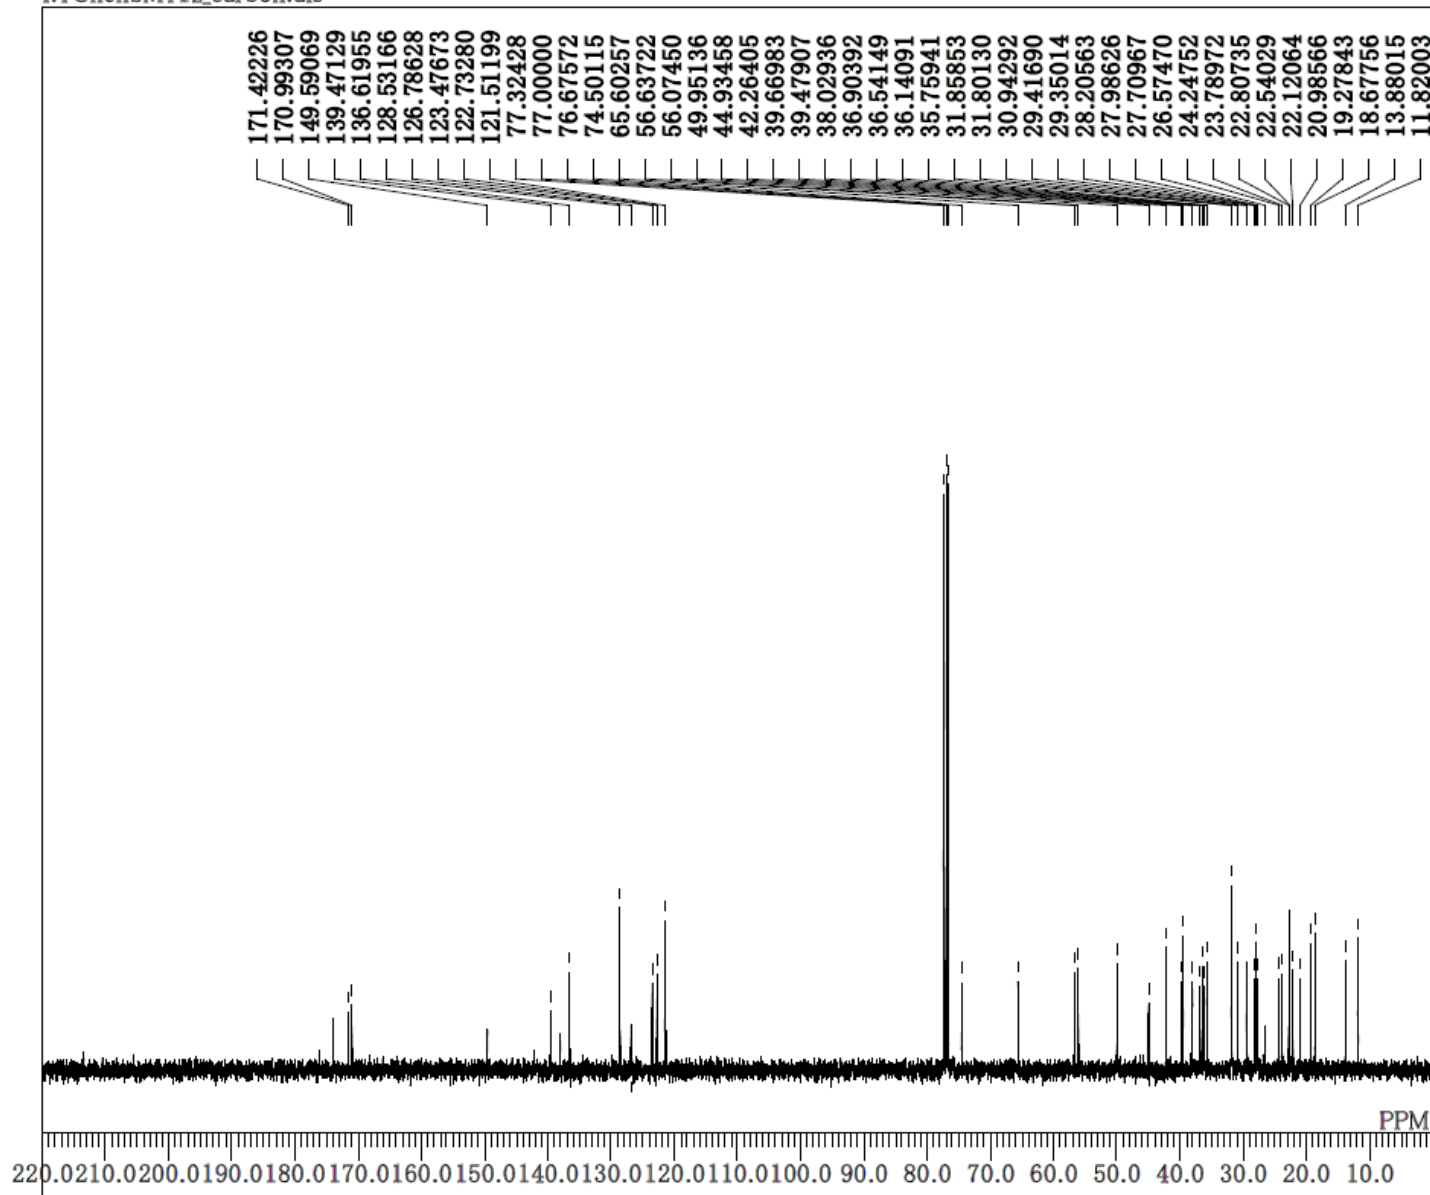

DFILE  
 COMNT  
 DATIM  
 OBNUC  
 EXMOD  
 OBFRQ  
 OBSET  
 OBFIN  
 POINT  
 FREQU  
 SCANS  
 ACQTM  
 PD  
 PW1  
 IRNUC  
 CTEMP  
 SLVNT  
 EXREF  
 BF  
 RGAIN

1z\_carbon.als  
 10-12-2019 20:42:00  
 13C  
 carbon.jxp  
 98.52 MHz  
 4.64 KHz  
 8.74 Hz  
 26214  
 24630.54 Hz  
 72  
 1.0643 sec  
 2.0000 sec  
 3.12 usec  
 1H  
 20.4 c  
 CDCL3  
 77.00 ppm  
 1.20 Hz  
 60

C:\Users\alice\Desktop\ChenSM\1aa\_proton.als

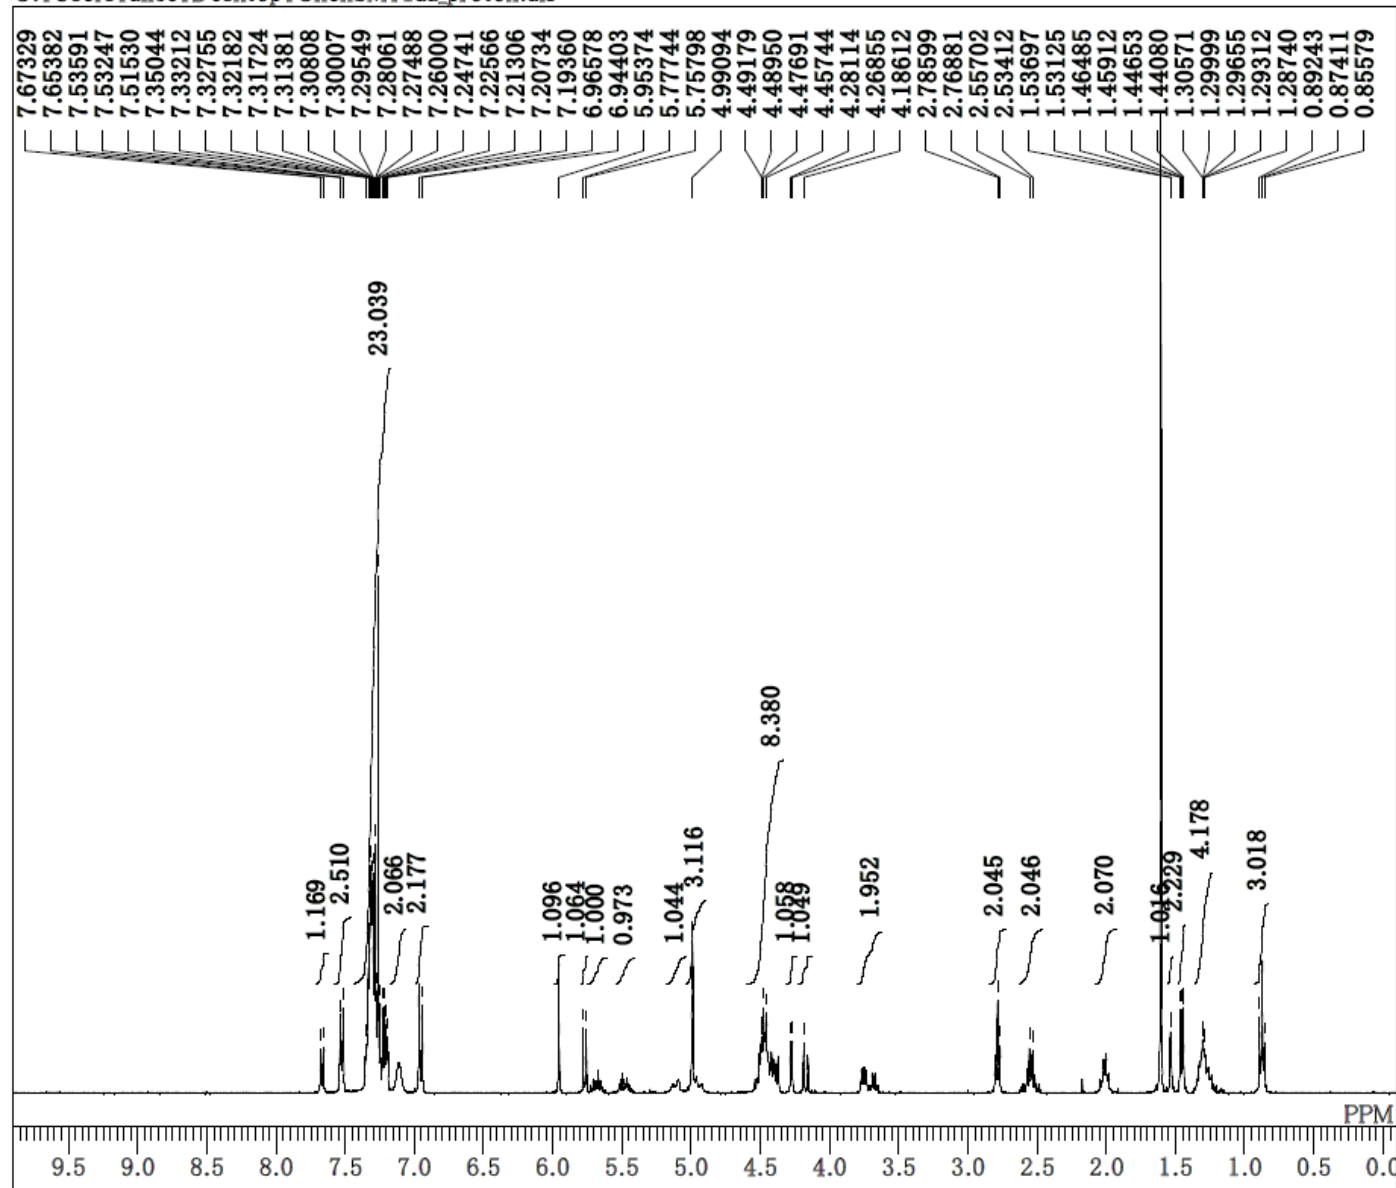

DFILE 1aa\_proton.als  
 COMNT  
 DATIM 04-01-2020 17:22:16  
 OBNUC <sup>1</sup>H  
 EXMOD proton.jxp  
 OBFRQ 391.78 MHz  
 OBSET 8.51 KHz  
 OBFIN 3.34 Hz  
 POINT 13107  
 FREQU 5878.90 Hz  
 SCANS 8  
 ACQTM 2.2295 sec  
 PD 6.0000 sec  
 PW1 5.17 usec  
 IRNUC <sup>1</sup>H  
 CTEMP 20.2 c  
 SLVNT CDCL<sub>3</sub>  
 EXREF 7.26 ppm  
 BF 0.12 Hz  
 RGAIN 44

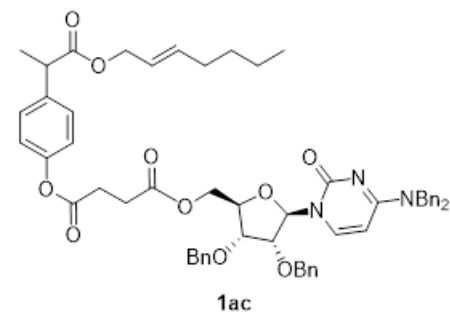



C:\Users\Valice\Desktop\ChenSM\1aa\_carbon.als

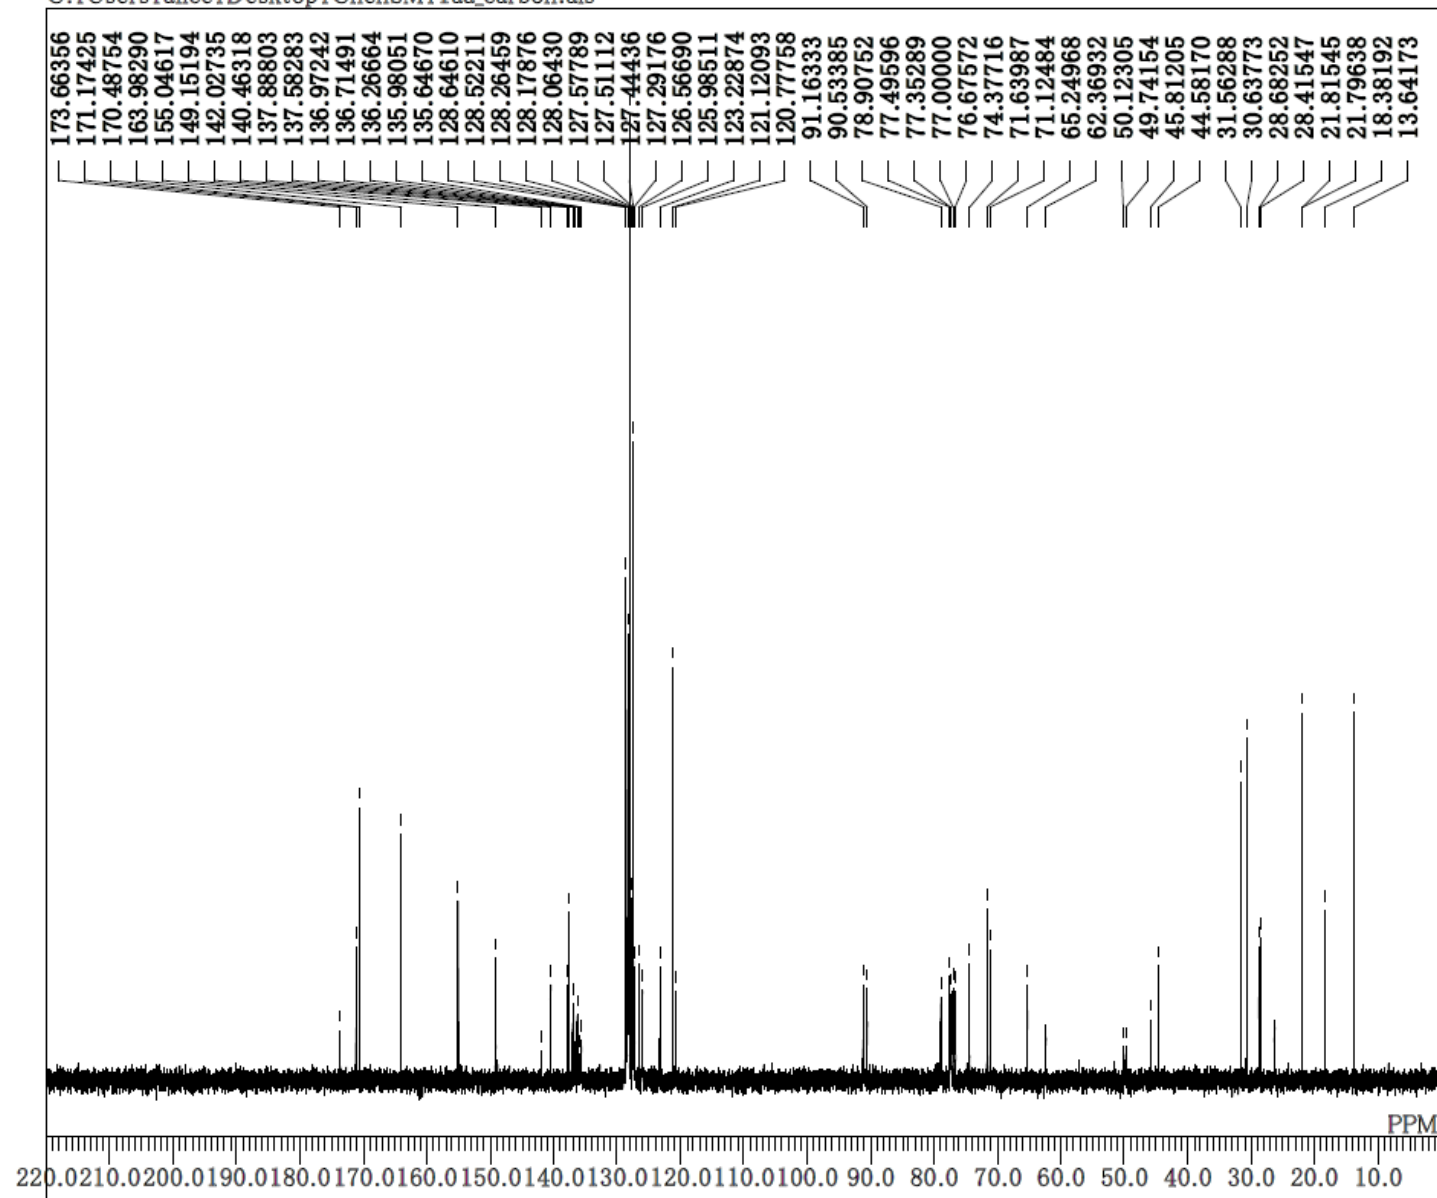

|       |                     |
|-------|---------------------|
| DFILE | 1aa_carbon.als      |
| COMNT |                     |
| DATIM | 04-01-2020 17:42:34 |
| OBNUC | <sup>13</sup> C     |
| EXMOD | carbon.jxp          |
| OBFRQ | 98.52 MHz           |
| OBSET | 4.64 KHz            |
| OBFIN | 8.74 Hz             |
| POINT | 26214               |
| FREQU | 24630.54 Hz         |
| SCANS | 60                  |
| ACQTM | 1.0643 sec          |
| PD    | 2.0000 sec          |
| PW1   | 3.12 usec           |
| IRNUC | <sup>1</sup> H      |
| CTEMP | 20.5 c              |
| SLVNT | CDCL <sub>3</sub>   |
| EXREF | 77.00 ppm           |
| BF    | 0.12 Hz             |
| RGAIN | 60                  |



C:\Users\alice\Desktop\Gousei\Chen\Chen\_SM2\1ad\_proton.als

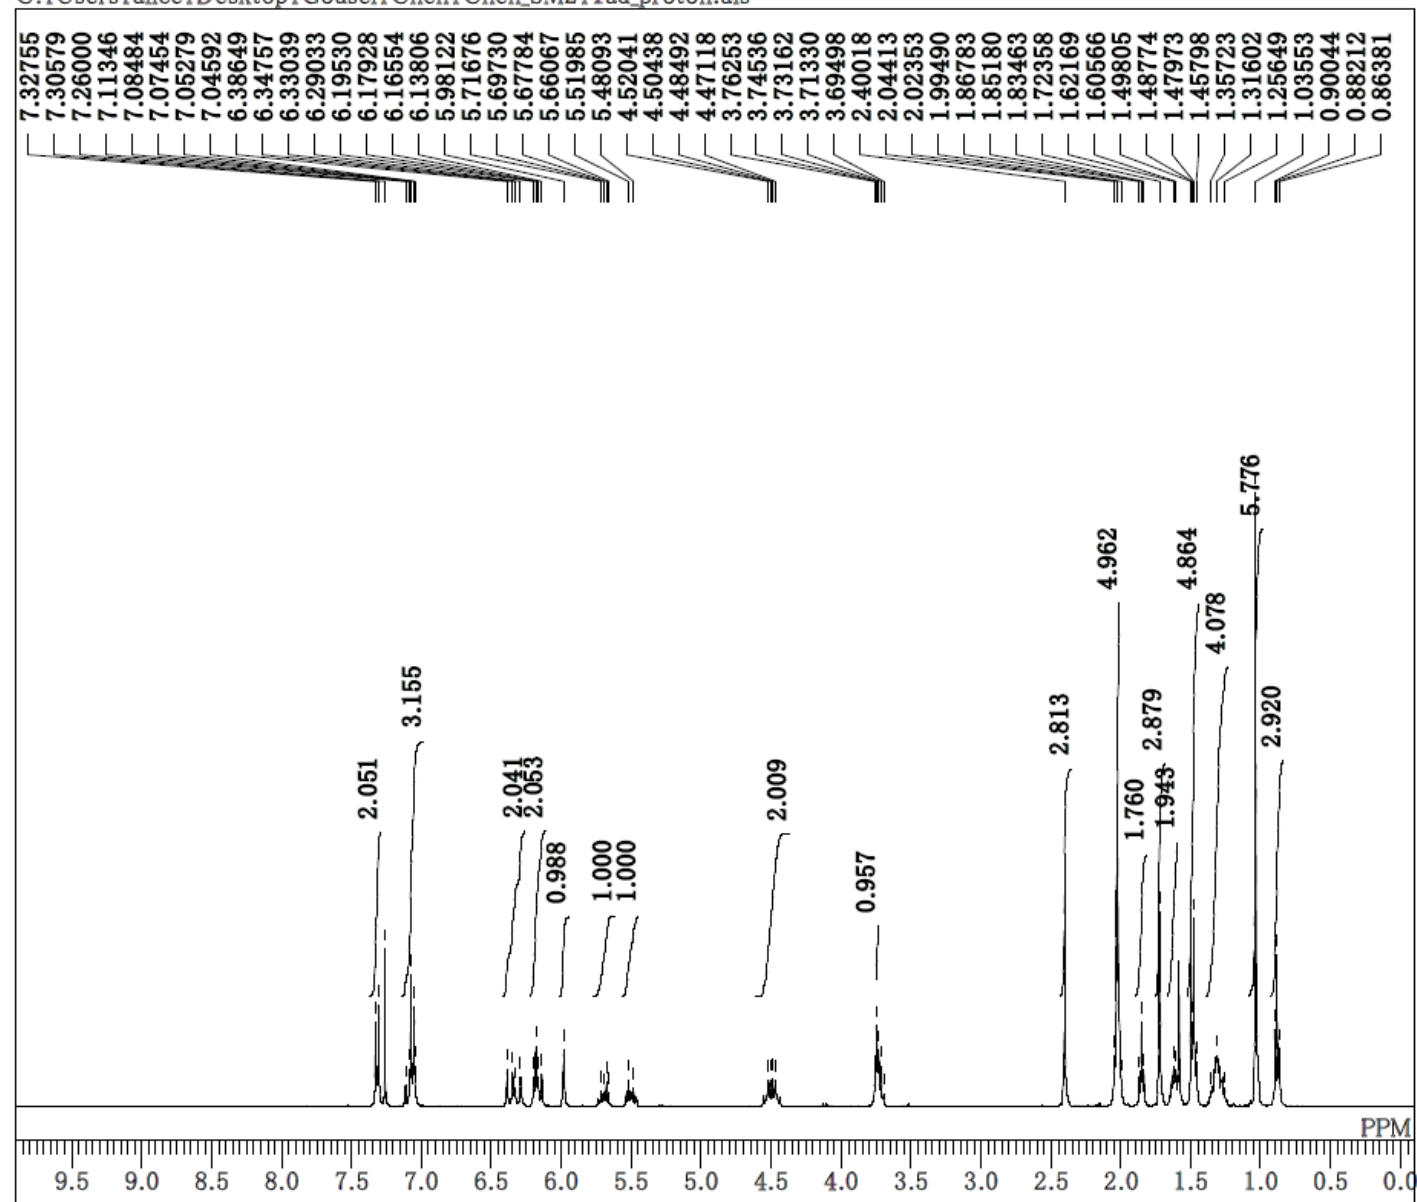

DFILE 1ad\_proton.als  
 COMNT  
 DATIM 10-10-2020 15:21:02  
 OBNUC 1H  
 EXMOD proton.jxp  
 OBFRQ 391.78 MHz  
 OBSET 8.51 KHz  
 OBFIN 3.34 Hz  
 POINT 13107  
 FREQU 5878.90 Hz  
 SCANS 8  
 ACQTM 2.2295 sec  
 PD 6.0000 sec  
 PW1 5.17 usec  
 IRNUC 1H  
 CTEMP 21.0 c  
 SLVNT CDCL3  
 EXREF 7.26 ppm  
 BF 0.12 Hz  
 RGAIN 36

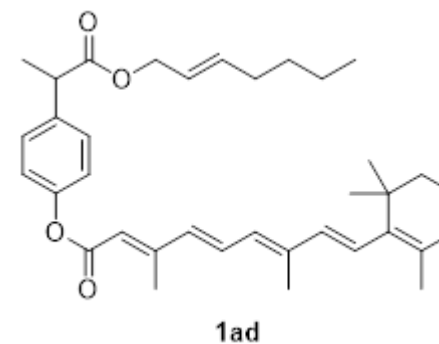

C:\Users\Valice\Desktop\Gousei\Chen\Chen\_SM2\1ad\_carbon.als

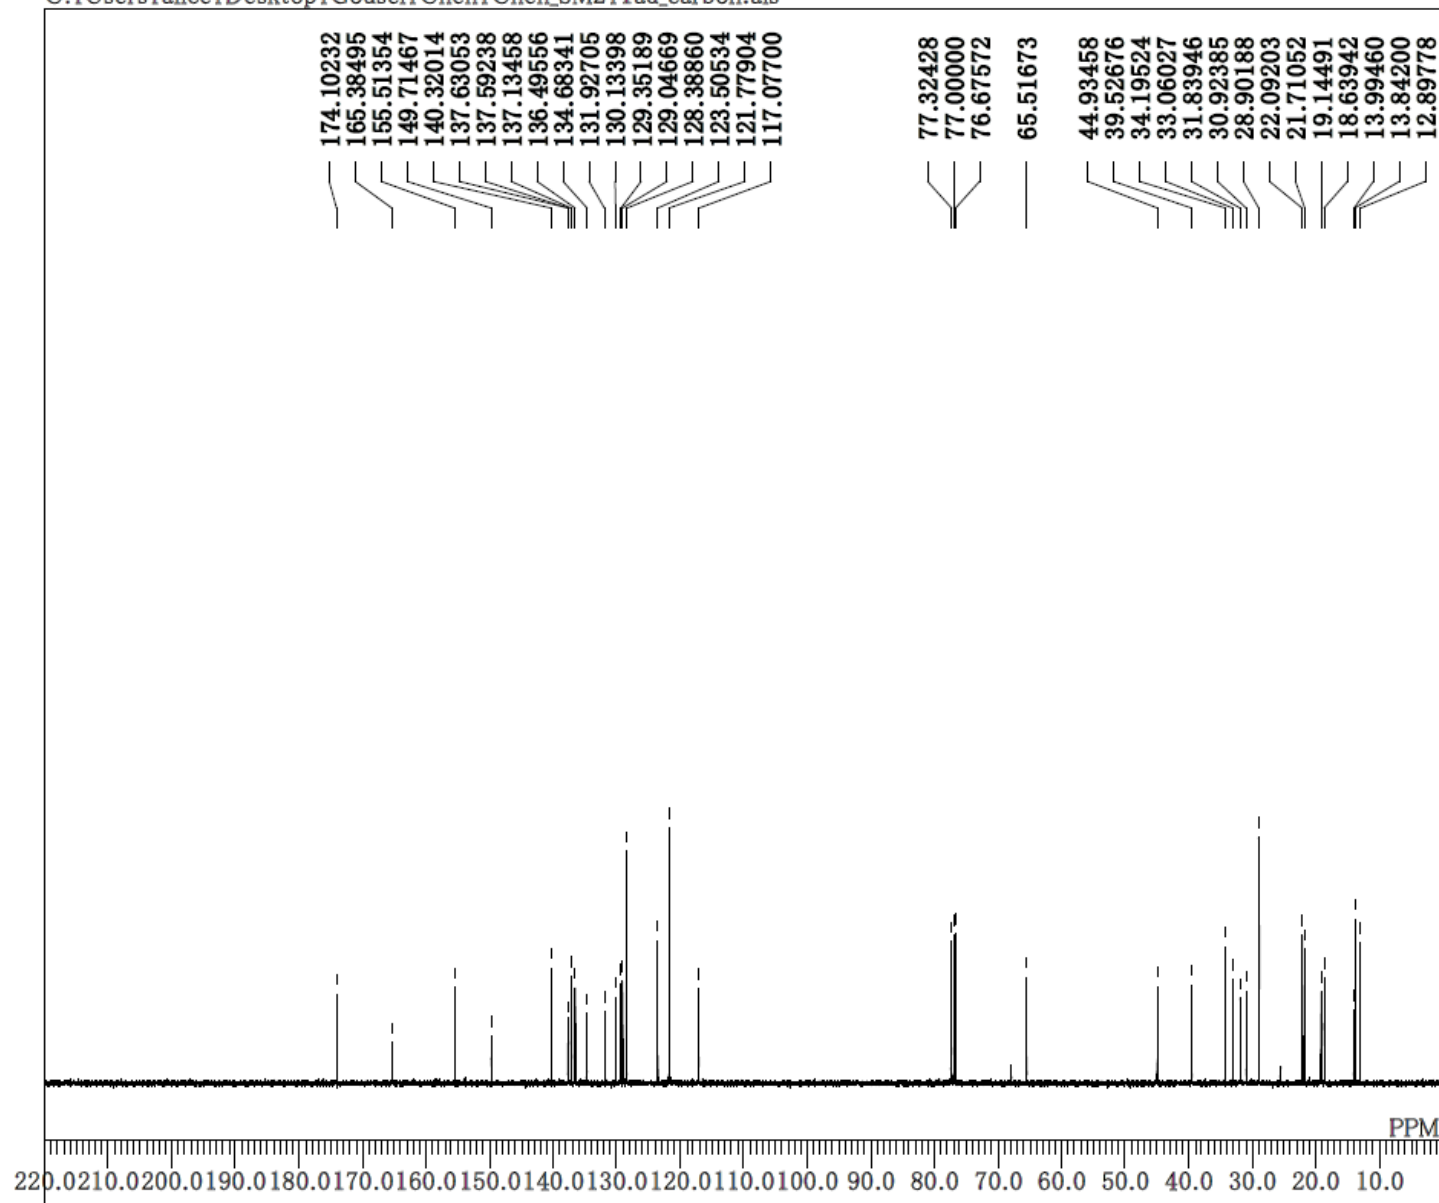

DFILE 1ad\_carbon.als  
 COMNT  
 DATIM 12-10-2020 17:47:10  
 OBNUC 13C  
 EXMOD carbon.jxp  
 OBFRQ 98.52 MHz  
 OBSET 4.64 KHz  
 OBFIN 8.74 Hz  
 POINT 26214  
 FREQU 24630.54 Hz  
 SCANS 293  
 ACQTM 1.0643 sec  
 PD 2.0000 sec  
 PW1 3.12 usec  
 IRNUC 1H  
 CTEMP 21.0 c  
 SLVNT CDCL3  
 EXREF 77.00 ppm  
 BF 0.12 Hz  
 RGAIN 60

C:\Users\Valice\Desktop\ChenTM NMR\2a\_proton.als

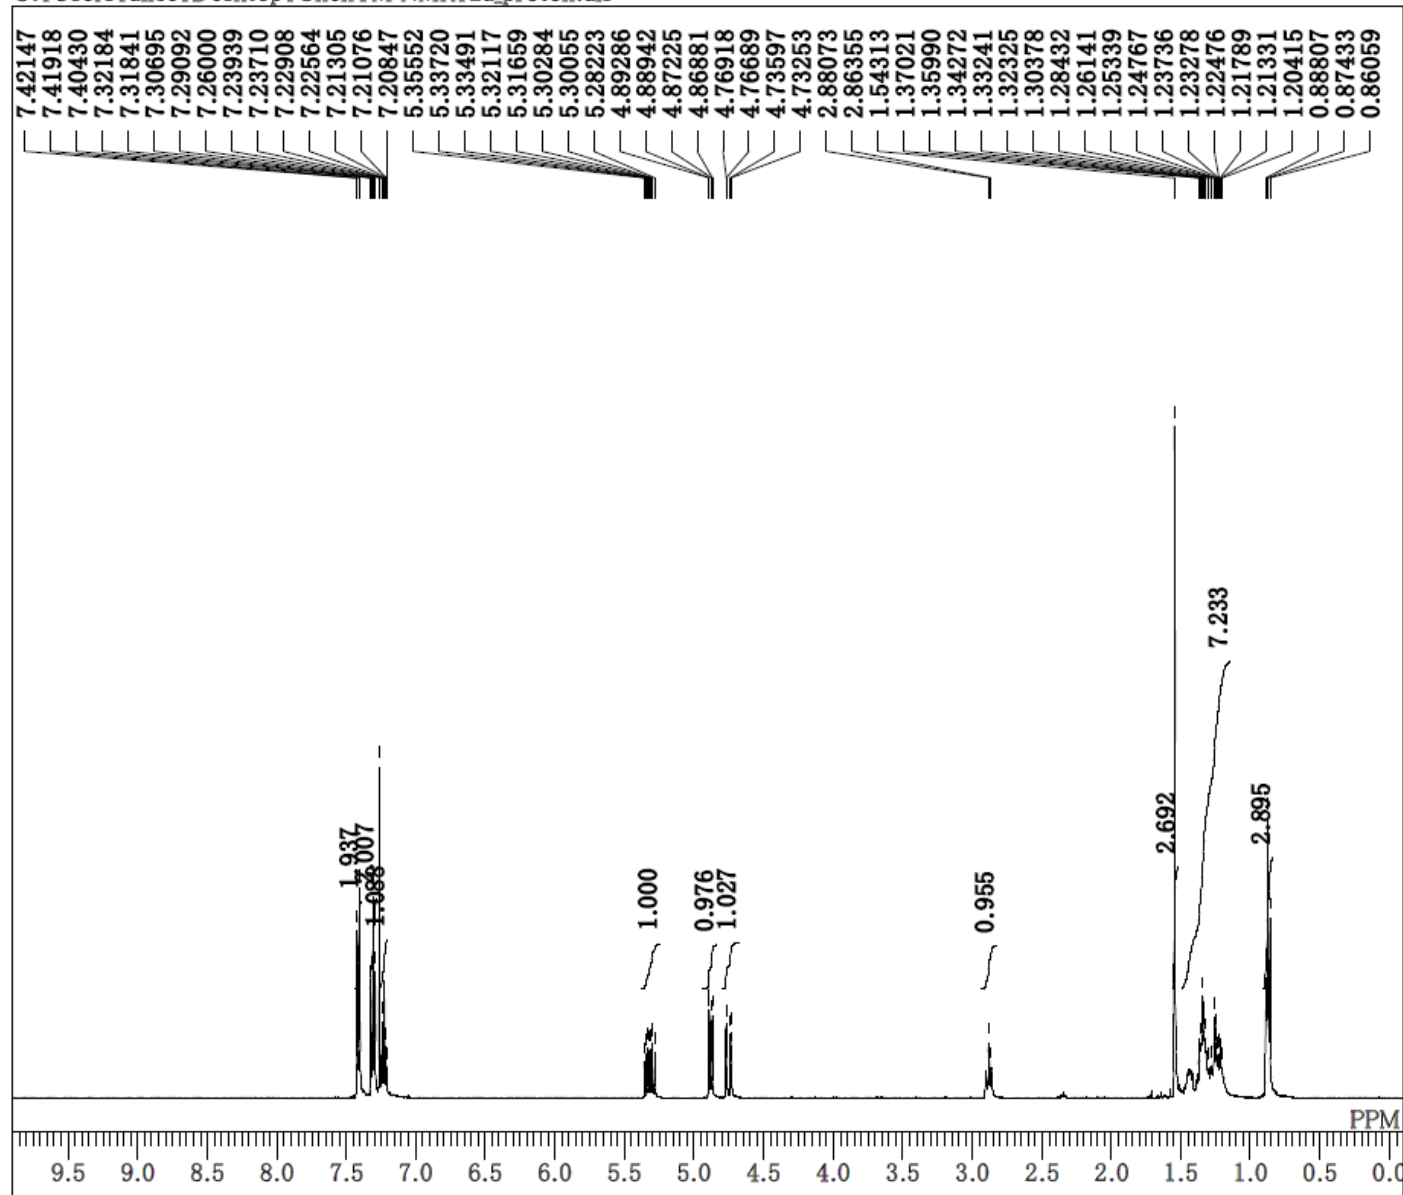

DFILE 2a\_proton.als  
 COMNT  
 DATIM 2020-04-15 15:04:10  
 OBNUC 1H  
 EXMOD proton.jxp  
 OBFRQ 500.16 MHz  
 OBSET 2.41 KHz  
 OBFIN 6.01 Hz  
 POINT 13107  
 FREQU 7507.51 Hz  
 SCANS 8  
 ACQTM 1.7459 sec  
 PD 6.0000 sec  
 PW1 5.55 usec  
 IRNUC 1H  
 CTEMP 21.2 c  
 SLVNT CDCL3  
 EXREF 7.26 ppm  
 BF 0.12 Hz  
 RGAIN 42

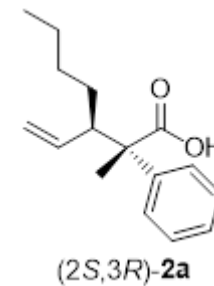

C:\Users\Yalice\Desktop\ChenTM NMR\2a\_carbon.als

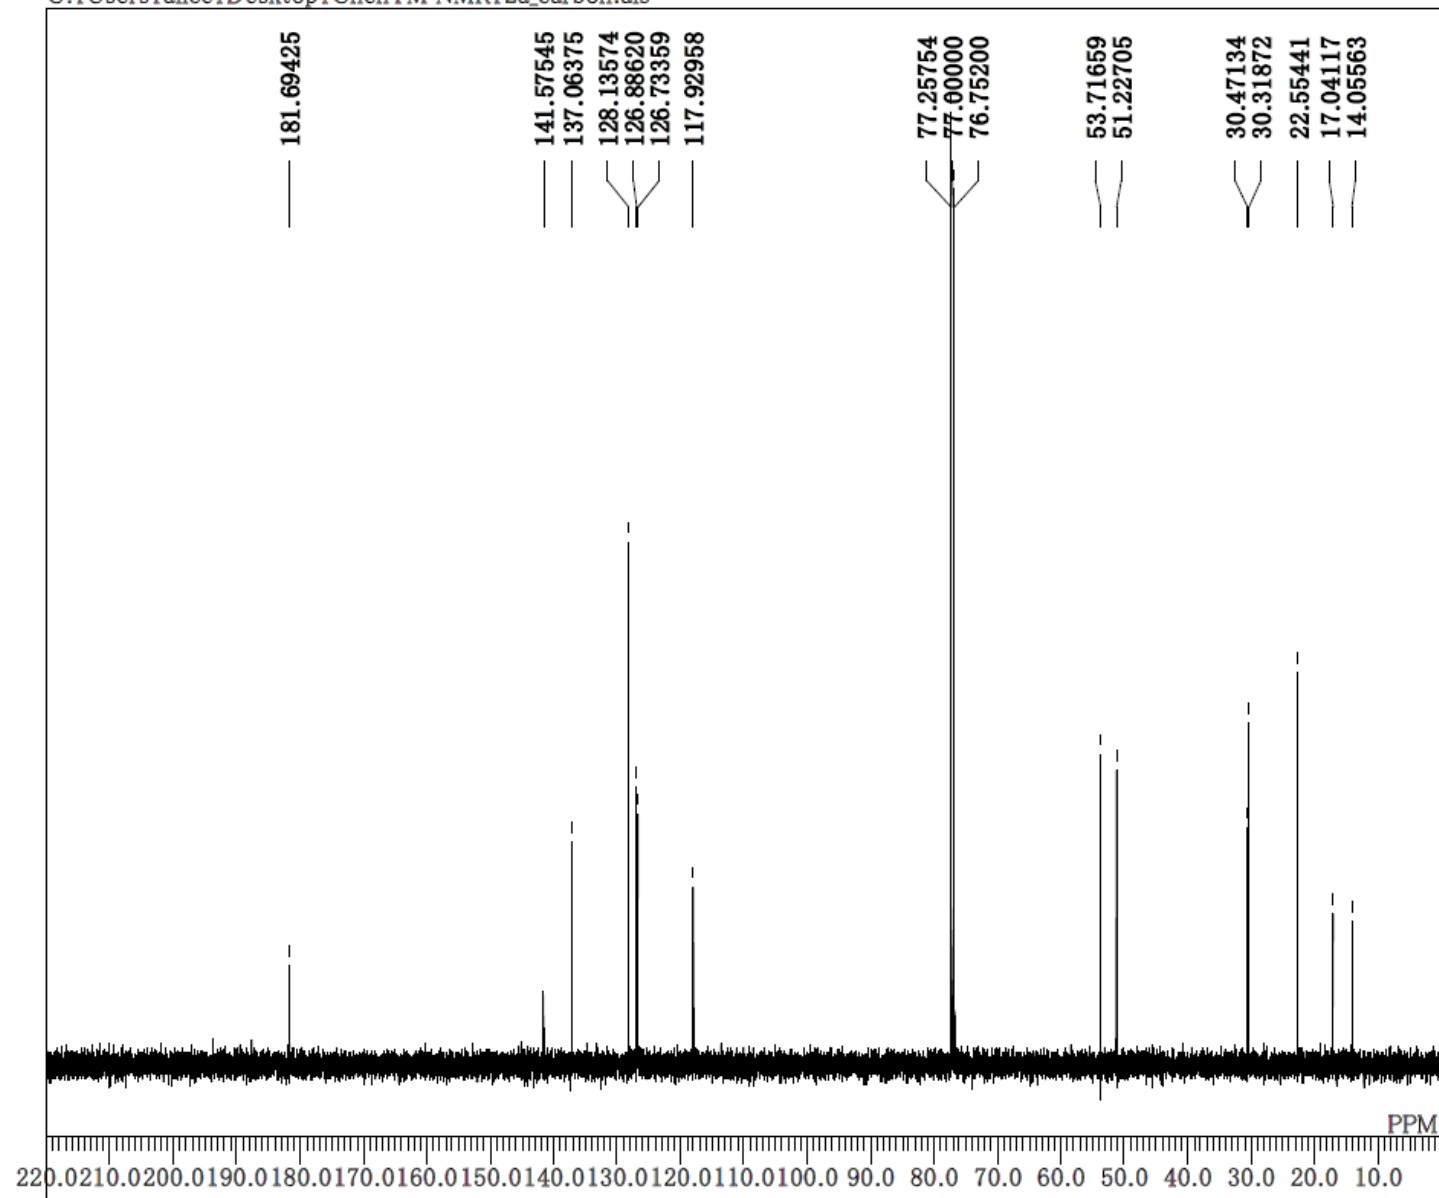

|       |                     |
|-------|---------------------|
| DFILE | 2a_carbon.als       |
| COMNT |                     |
| DATIM | 2020-04-15 16:54:06 |
| OBNUC | <sup>13</sup> C     |
| EXMOD | carbon.jxp          |
| OBFRQ | 125.77 MHz          |
| OBSET | 7.87 KHz            |
| OBFIN | 4.21 Hz             |
| POINT | 26214               |
| FREQU | 31446.54 Hz         |
| SCANS | 100                 |
| ACQTM | 0.8336 sec          |
| PD    | 2.0000 sec          |
| PW1   | 3.40 usec           |
| IRNUC | <sup>1</sup> H      |
| CTEMP | 21.3 c              |
| SLVNT | CDCL <sub>3</sub>   |
| EXREF | 77.00 ppm           |
| BF    | 0.12 Hz             |
| RGAIN | 60                  |

C:\Users\alice\Desktop\ChenTM NMR\2a'\_proton.als

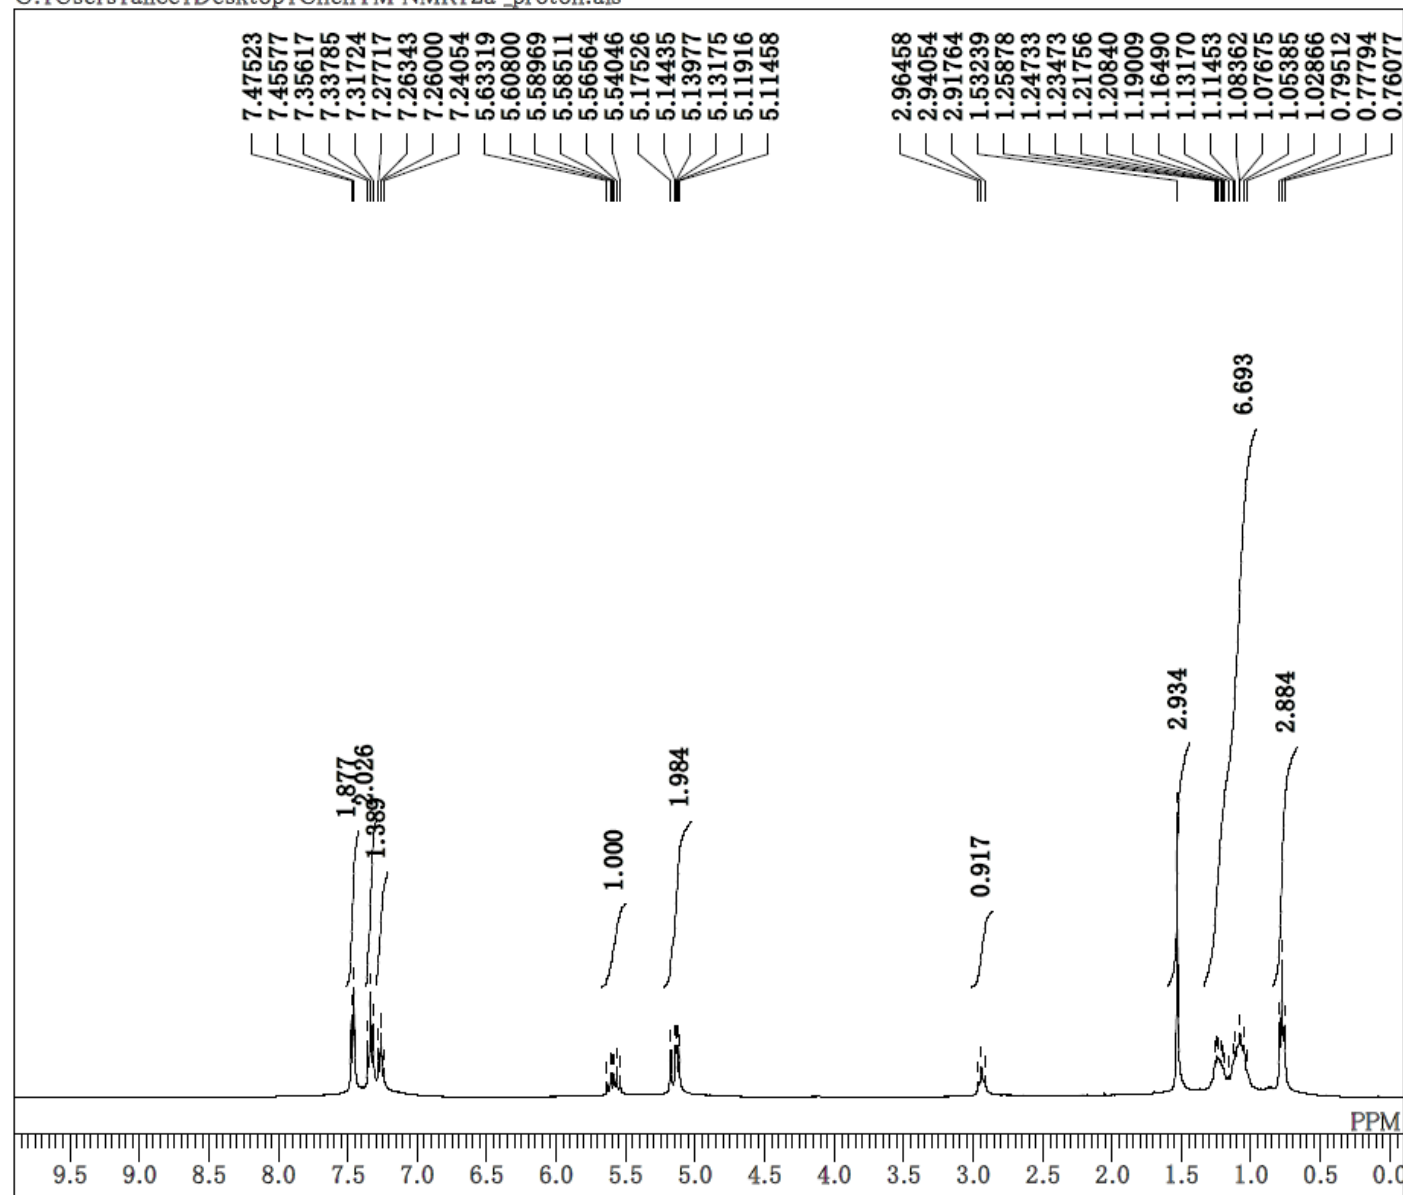

DFILE  
 COMNT  
 DATIM  
 OBNUC  
 EXMOD  
 OBFRQ  
 OBSET  
 OBFIN  
 POINT  
 FREQU  
 SCANS  
 ACQTM  
 PD  
 PW1  
 IRNUC  
 CTEMP  
 SLVNT  
 EXREF  
 BF  
 RGAIN

2a'\_proton.als  
 04-04-2020 12:50:16  
 1H  
 proton.jxp  
 391.78 MHz  
 8.51 KHz  
 3.34 Hz  
 13107  
 5878.90 Hz  
 8  
 2.2295 sec  
 6.0000 sec  
 5.17 usec  
 1H  
 20.4 c  
 CDCL3  
 7.26 ppm  
 0.72 Hz  
 34

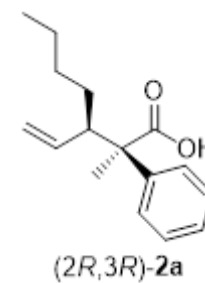

C:\Users\Valice\Desktop\ChenTM NMR\2a'\_carbon.als

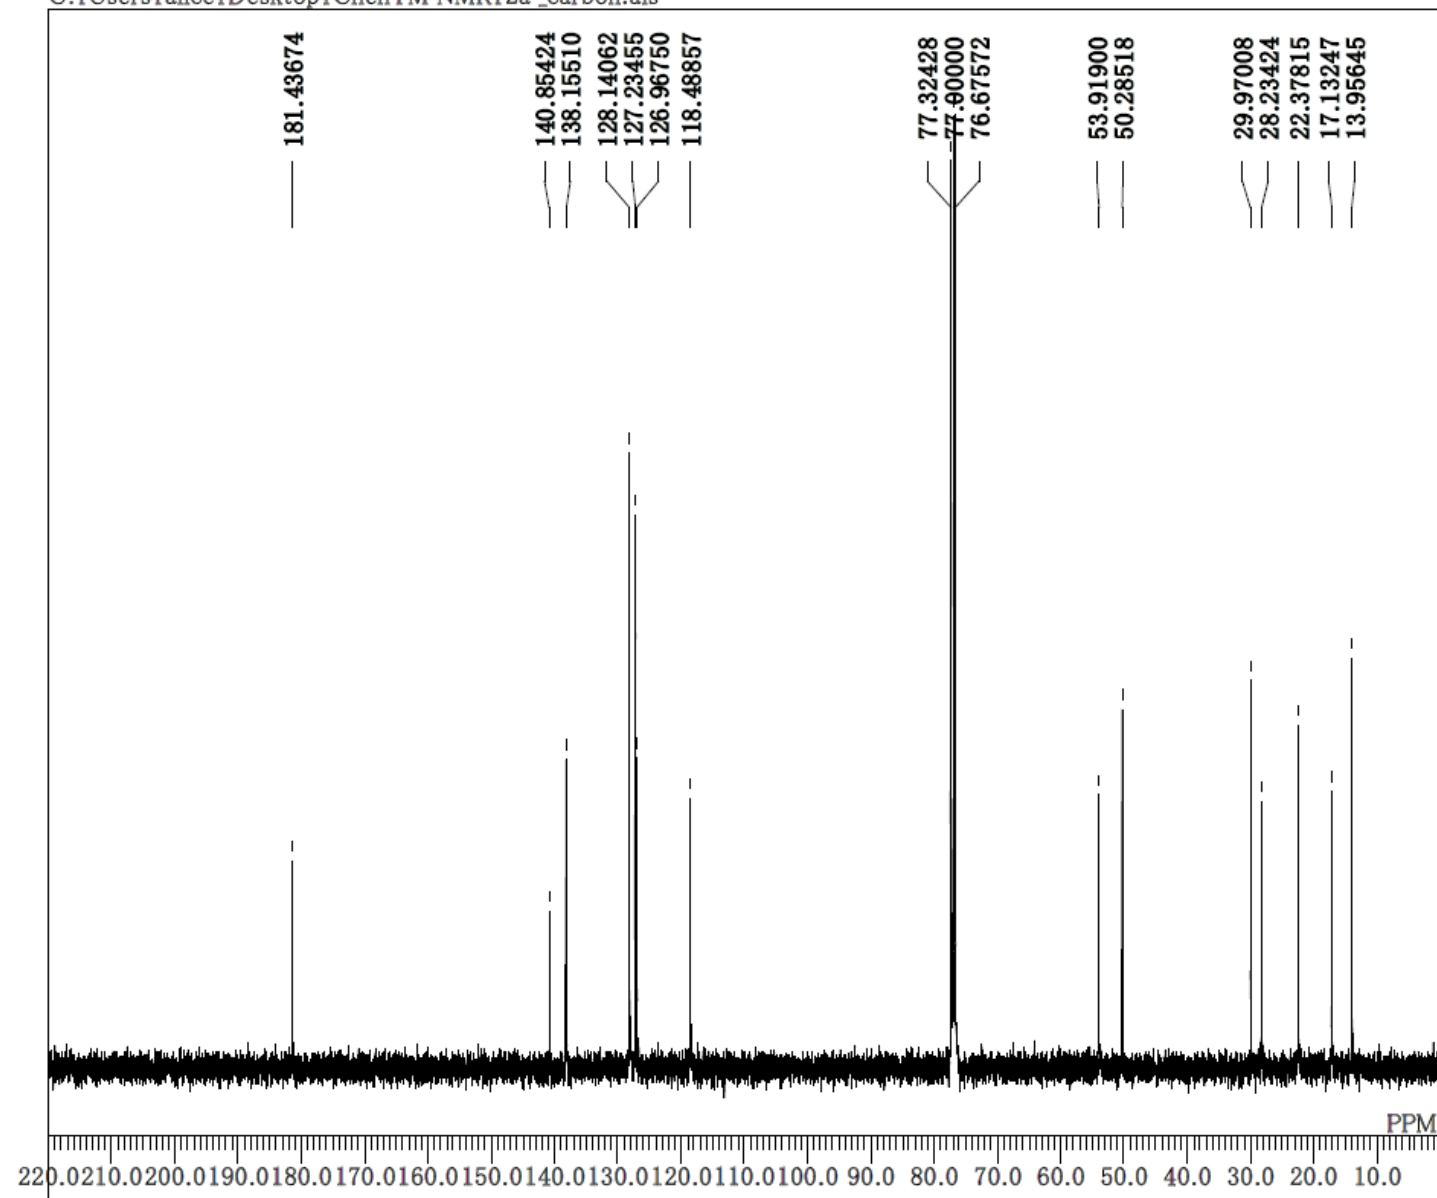

DFILE 2a'\_carbon.als  
 COMNT  
 DATIM 04-04-2020 12:53:18  
 OBNUC 13C  
 EXMOD carbon.jxp  
 OBFRQ 98.52 MHz  
 OBSET 4.64 KHz  
 OBFIN 8.74 Hz  
 POINT 26214  
 FREQU 24630.54 Hz  
 SCANS 244  
 ACQTM 1.0643 sec  
 PD 2.0000 sec  
 PW1 3.12 usec  
 IRNUC 1H  
 CTEMP 20.6 c  
 SLVNT CDCL3  
 EXREF 77.00 ppm  
 BF 0.72 Hz  
 RGAIN 60

C:\Users\Valice\Desktop\ChenTM NMR\2b\_proton.als

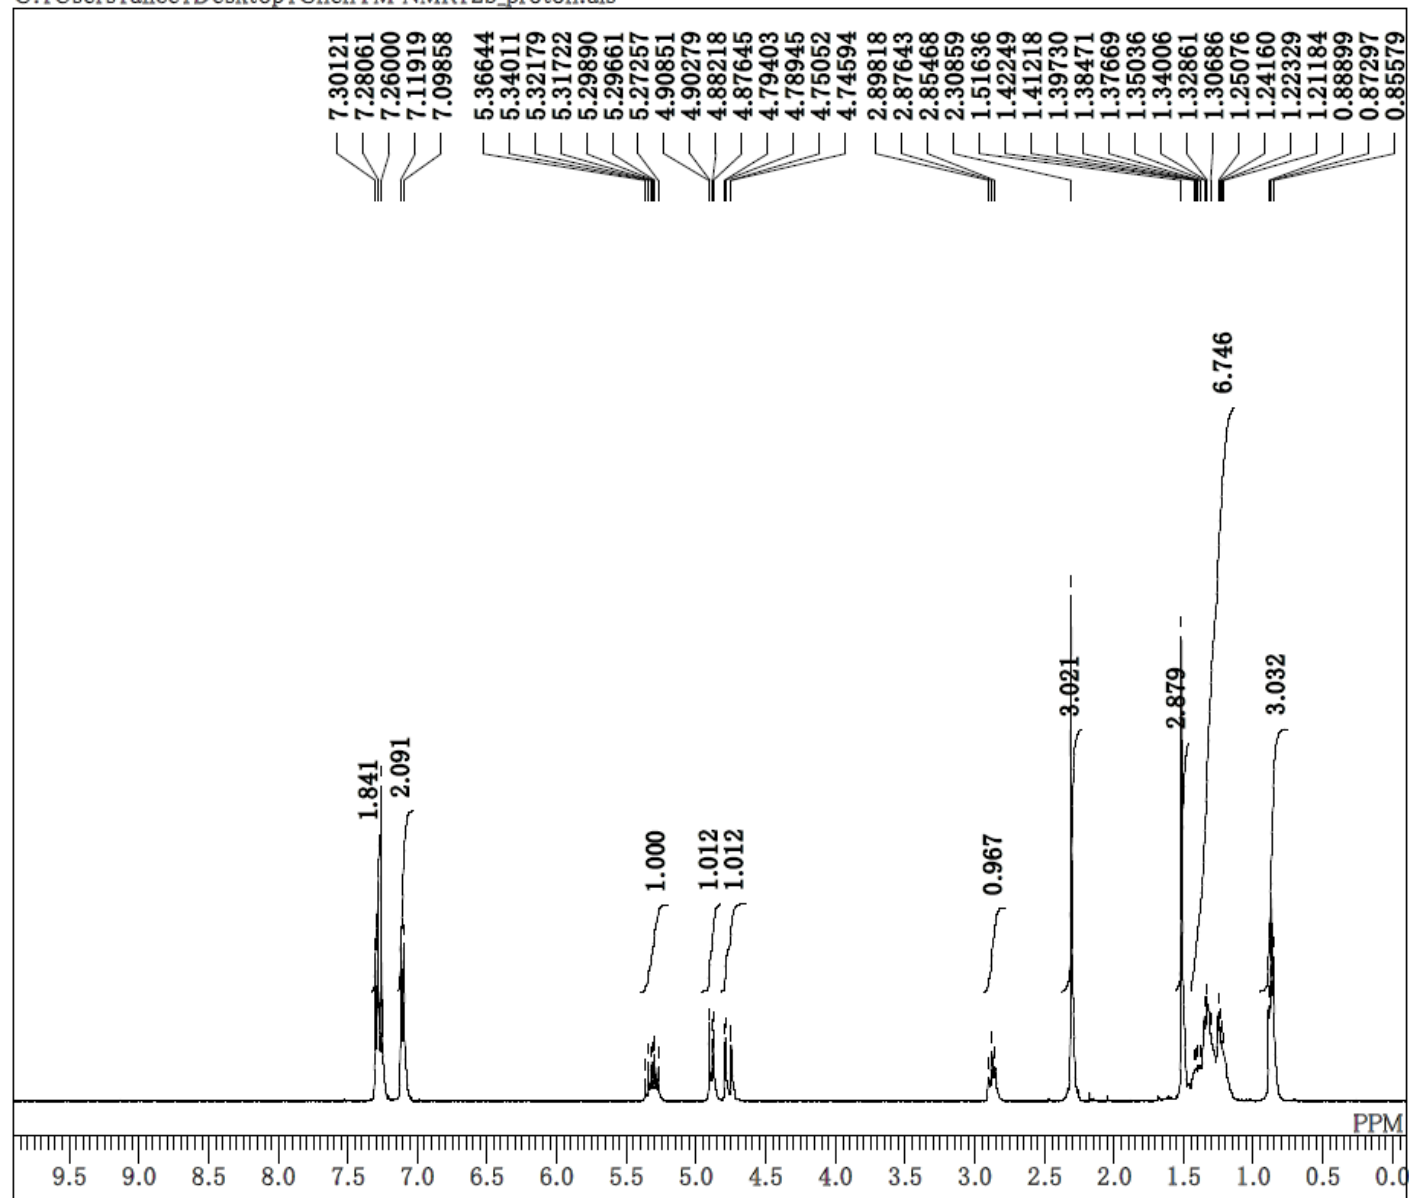

DFILE 2b\_proton.als  
 COMNT  
 DATIM 16-03-2020 22:12:27  
 OBNUC 1H  
 EXMOD proton.jxp  
 OBFRQ 391.78 MHz  
 OBSET 8.51 KHz  
 OBFIN 3.34 Hz  
 POINT 13107  
 FREQU 5878.90 Hz  
 SCANS 16  
 ACQTM 2.2295 sec  
 PD 6.0000 sec  
 PW1 5.17 usec  
 IRNUC 1H  
 CTEMP 20.1 c  
 SLVNT CDCL3  
 EXREF 7.26 ppm  
 BF 0.12 Hz  
 RGAIN 44

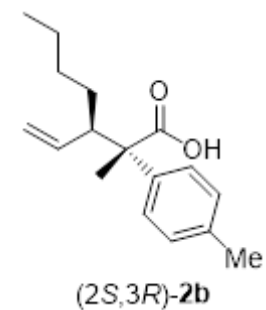

C:\Users\Valice\Desktop\ChenTM NMR\2b\_carbon.als

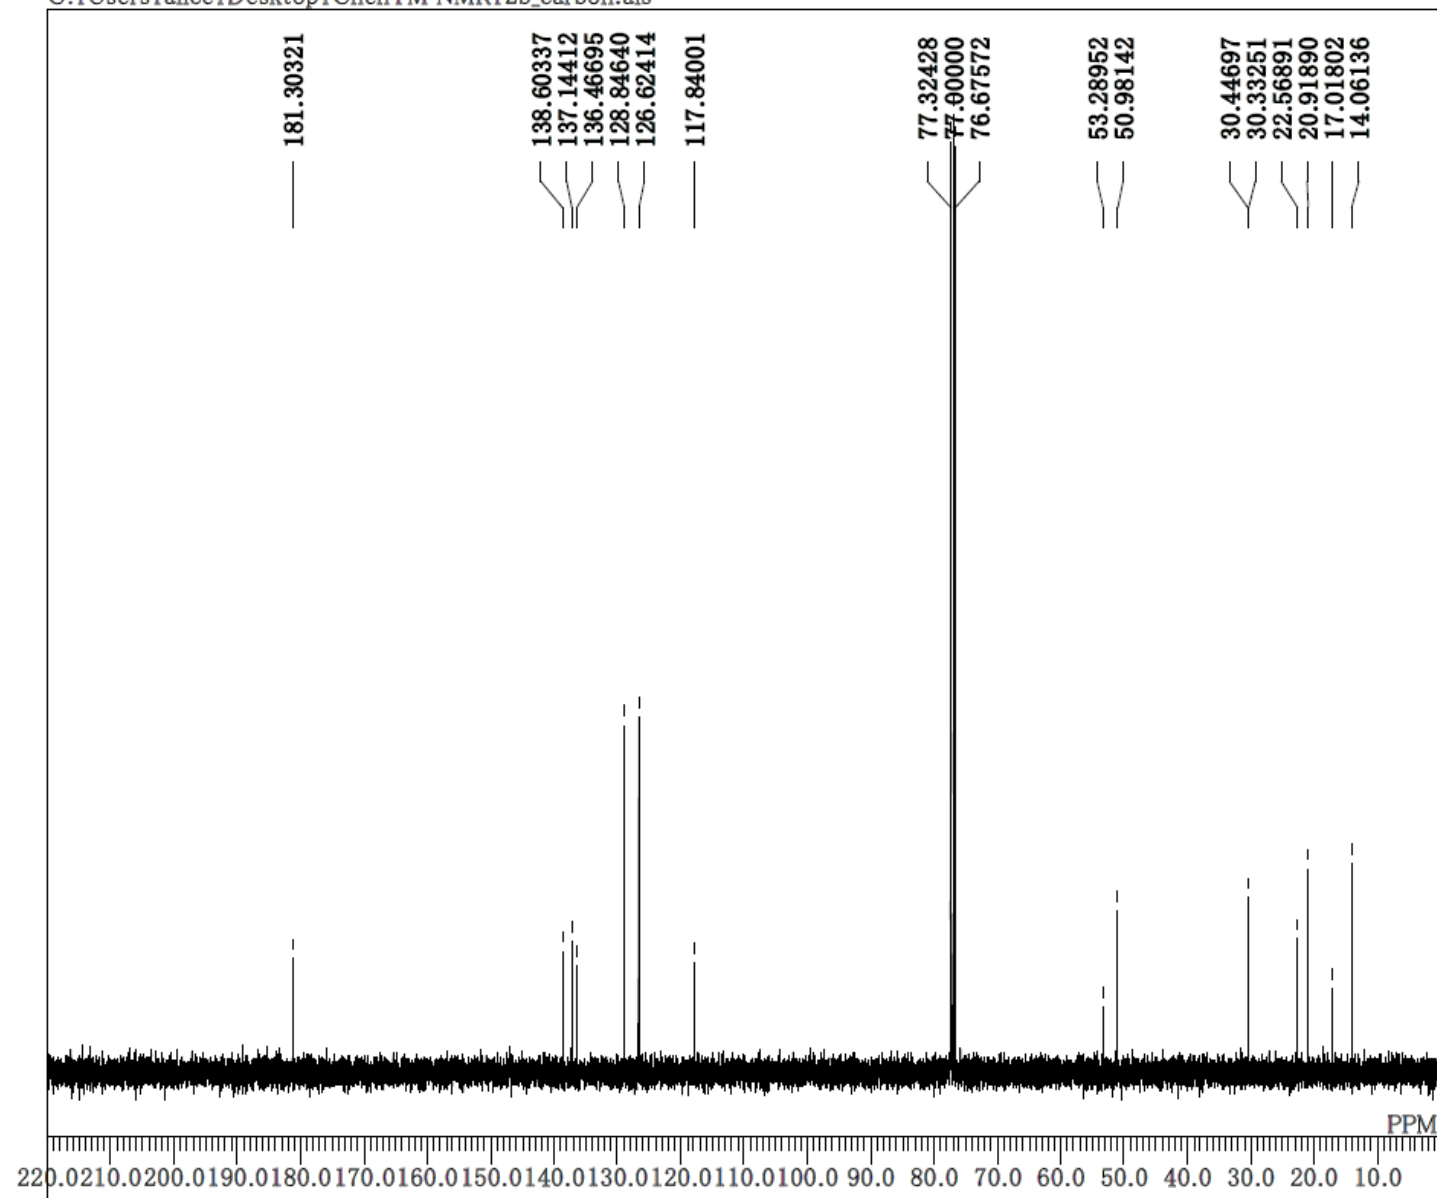

DFILE 2b\_carbon.als  
 COMNT  
 DATIM 16-03-2020 22:35:28  
 OBNUC 13C  
 EXMOD carbon.jpg  
 OBFRQ 98.52 MHz  
 OBSET 4.64 KHz  
 OBFIN 8.74 Hz  
 POINT 26214  
 FREQU 24630.54 Hz  
 SCANS 176  
 ACQTM 1.0643 sec  
 PD 2.0000 sec  
 PW1 3.12 usec  
 IRNUC 1H  
 CTEMP 20.2 c  
 SLVNT CDCL3  
 EXREF 77.00 ppm  
 BF 0.12 Hz  
 RGAIN 60



C:\Users\valice\Desktop\ChenTM NMR\2b'\_proton.als

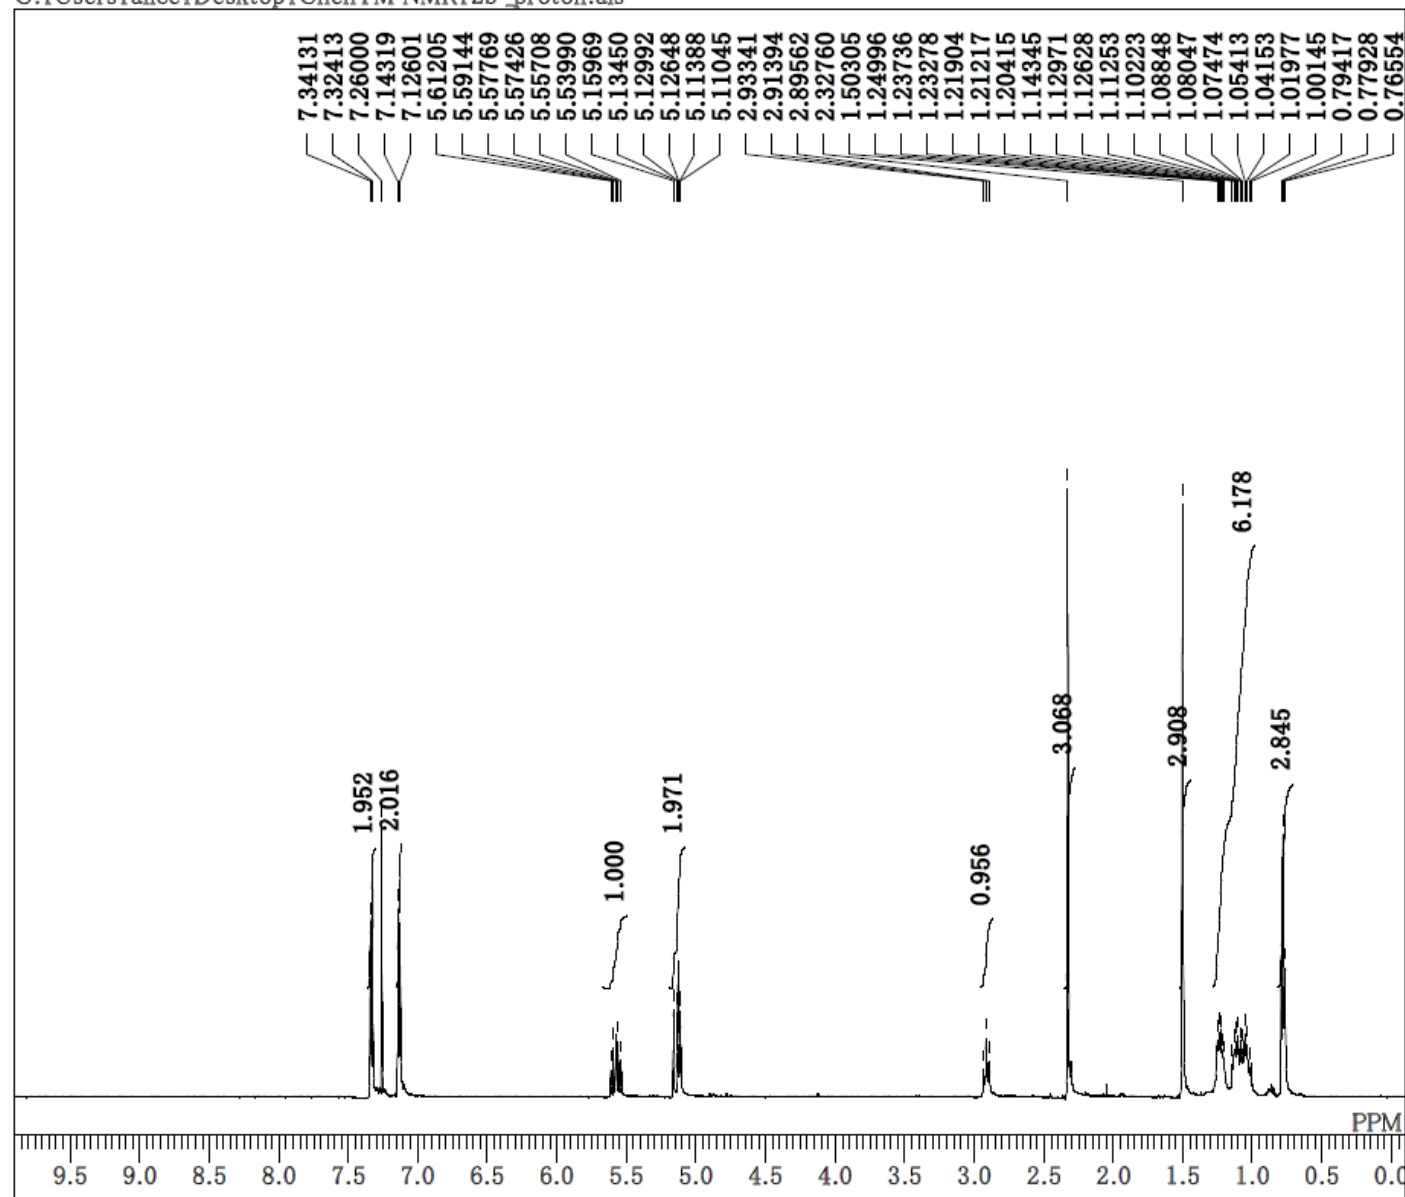

DFILE  
COMNT  
DATIM  
OBNUC  
EXMOD  
OBFRQ  
OBSET  
OBFIN  
POINT  
FREQU  
SCANS  
ACQTM  
PD  
PW1  
IRNUC  
CTEMP  
SLVNT  
EXREF  
BF  
RGAIN

2b'\_proton.als  
2019-09-25 14:42:26  
1H  
proton.jxp  
500.16 MHz  
2.41 KHz  
6.01 Hz  
13107  
7507.51 Hz  
8  
1.7459 sec  
6.0000 sec  
5.55 usec  
1H  
21.5 c  
CDCL3  
7.26 ppm  
0.12 Hz  
42

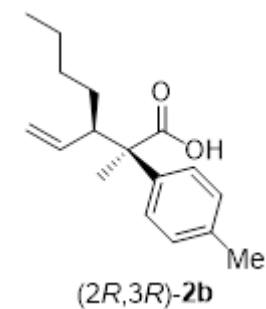

C:\Users\Valice\Desktop\ChenTM NMR\2b'\_carbon.als

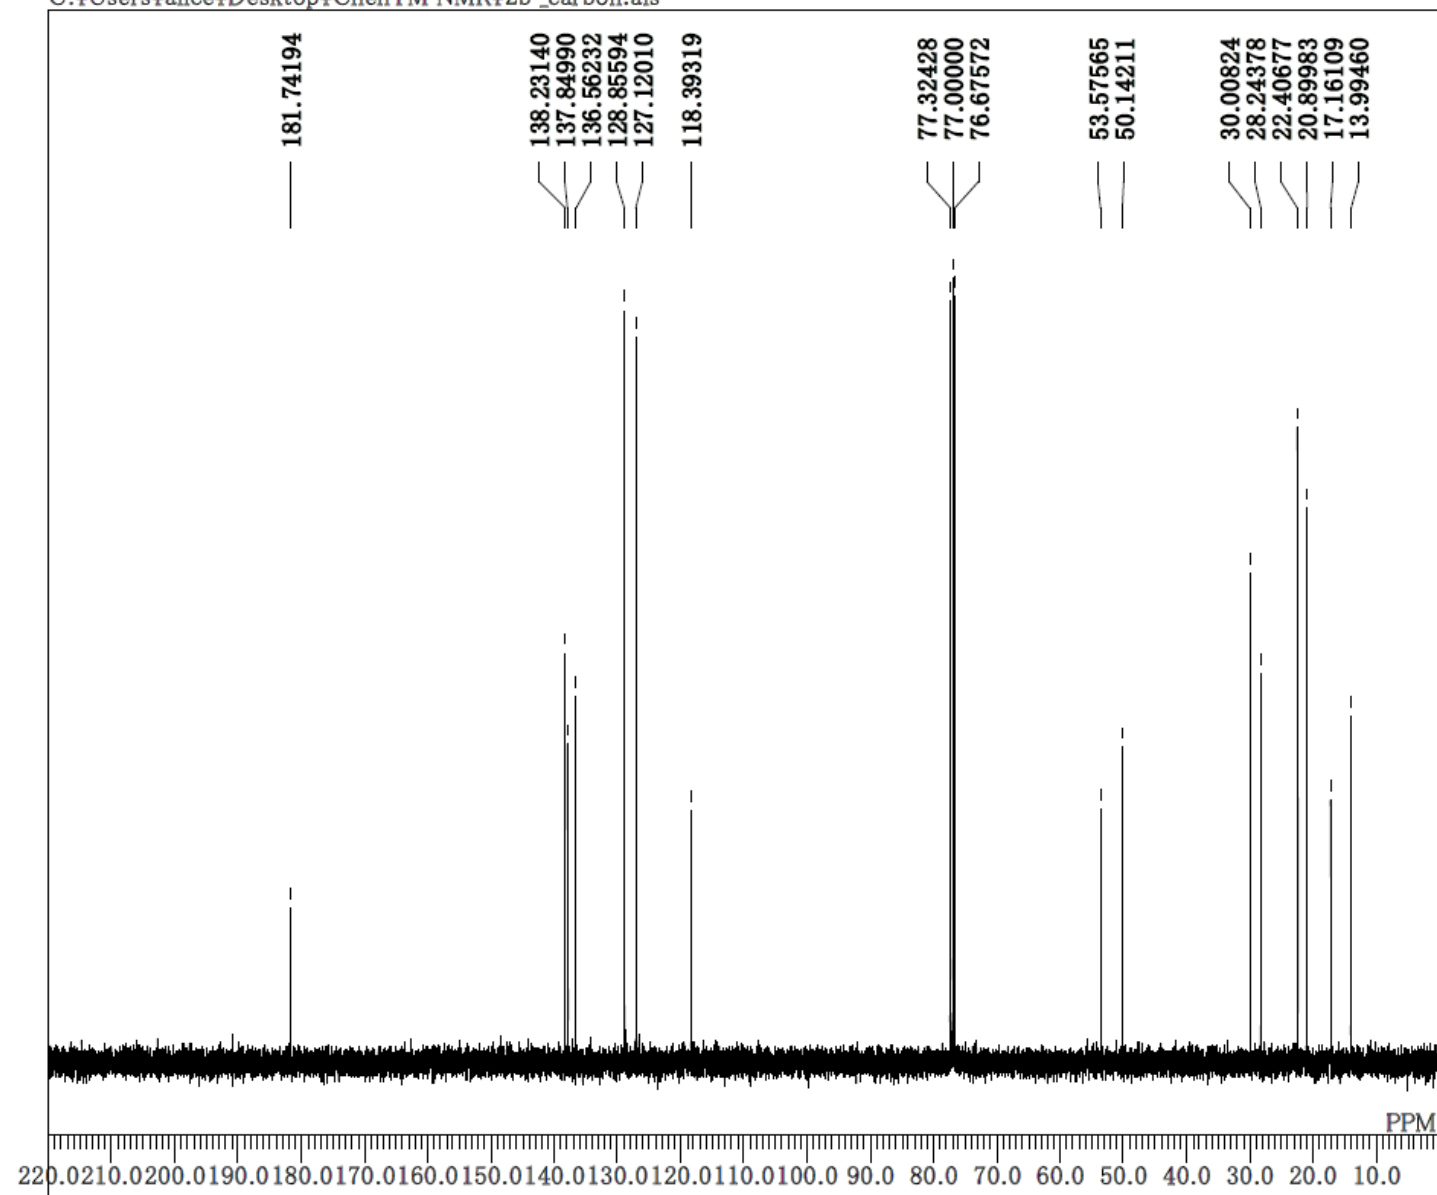

DFILE 2b'\_carbon.als  
 COMNT  
 DATIM 25-09-2019 16:44:15  
 OBNUC 13C  
 EXMOD carbon.jpg  
 OBFRQ 98.52 MHz  
 OBSET 4.64 KHz  
 OBFIN 8.74 Hz  
 POINT 26214  
 FREQU 24630.54 Hz  
 SCANS 101  
 ACQTM 1.0643 sec  
 PD 2.0000 sec  
 PW1 3.12 usec  
 IRNUC 1H  
 CTEMP 21.2 c  
 SLVNT CDCL3  
 EXREF 77.00 ppm  
 BF 0.12 Hz  
 RGAIN 60

C:\Users\valice\Desktop\ChenTM NMR\2c\_proton.als

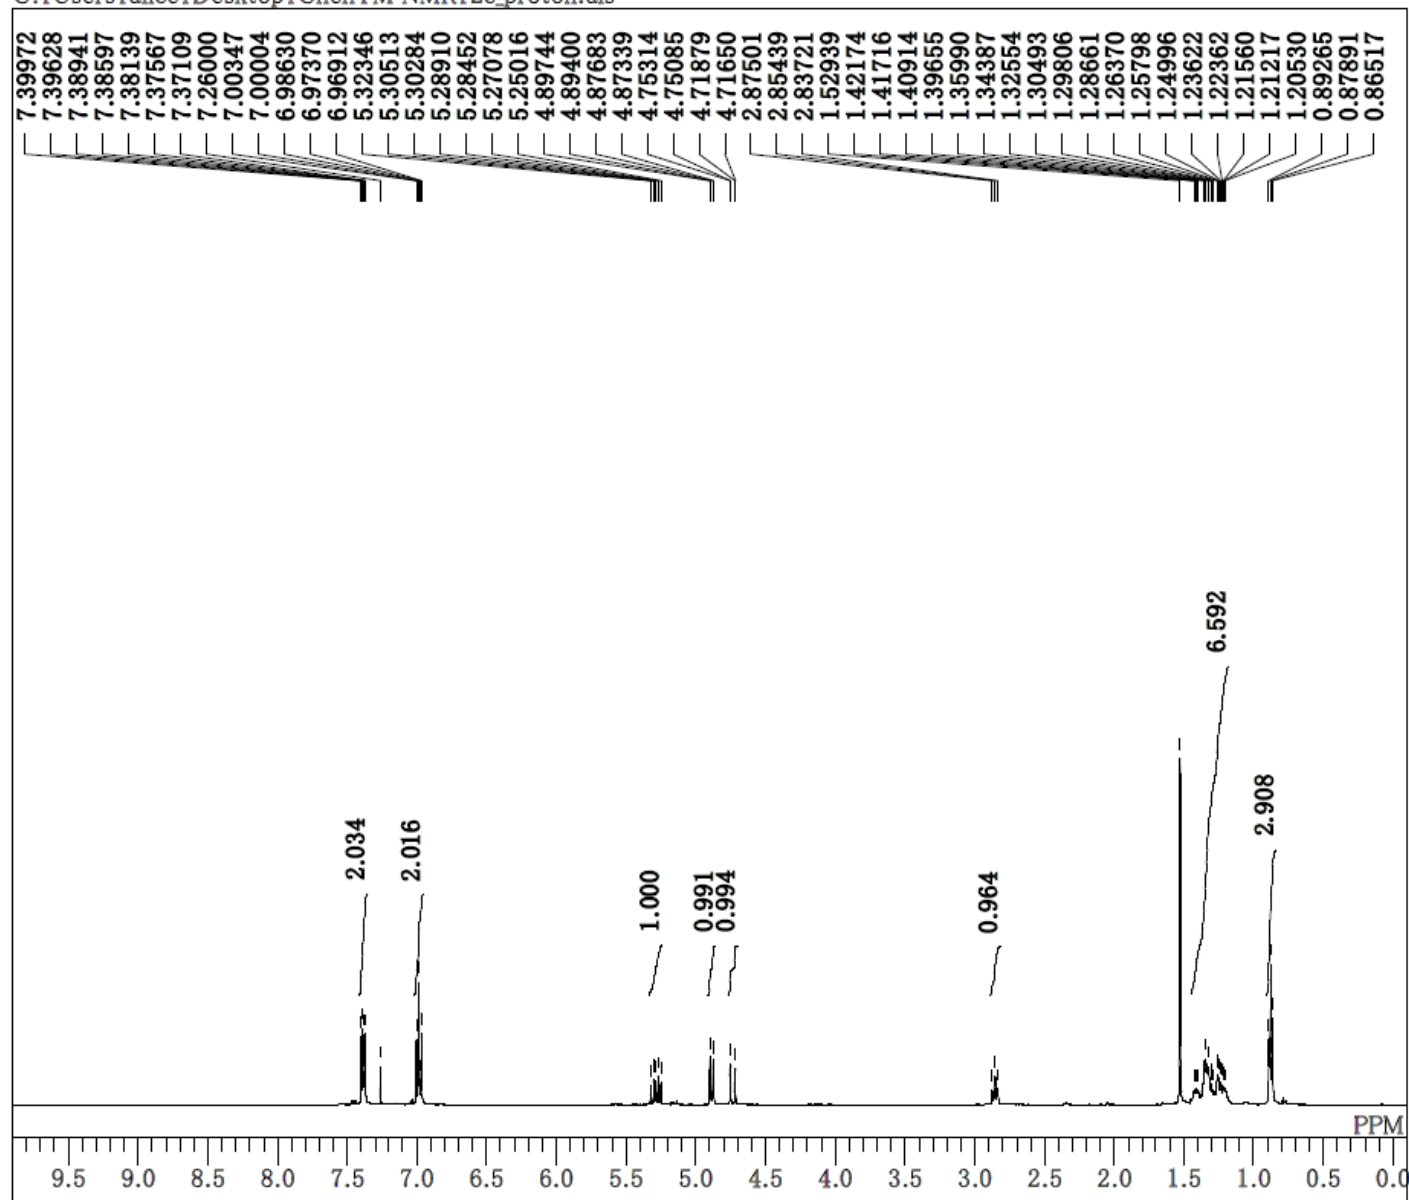

DFILE 2c\_proton.als  
 COMNT  
 DATIM 2019-09-26 13:36:18  
 OBNUC 1H  
 EXMOD proton.jxp  
 OBFRQ 500.16 MHz  
 OBSET 2.41 KHz  
 OBFIN 6.01 Hz  
 POINT 13107  
 FREQU 7507.51 Hz  
 SCANS 8  
 ACQTM 1.7459 sec  
 PD 6.0000 sec  
 PW1 5.55 usec  
 IRNUC 1H  
 CTEMP 21.5 c  
 SLVNT CDCL3  
 EXREF 7.26 ppm  
 BF 0.12 Hz  
 RGAIN 38

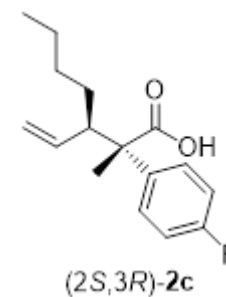

C:\Users\alice\Desktop\ChenTM NMR\2c\_carbon.als

DFILE 2c\_carbon.als  
 COMNT  
 DATIM 2019-09-10 21:24:18  
 OBNUC <sup>13</sup>C  
 EXMOD carbon.jpg  
 OBFRQ 125.77 MHz  
 OBSET 7.87 KHz  
 OBFIN 4.21 Hz  
 POINT 26214  
 FREQU 31446.54 Hz  
 SCANS 99  
 ACQTM 0.8336 sec  
 PD 2.0000 sec  
 PW1 3.40 usec  
 IRNUC <sup>1</sup>H  
 CTEMP 21.9 c  
 SLVNT CDCL<sub>3</sub>  
 EXREF 77.00 ppm  
 BF 0.12 Hz  
 RGAIN 60

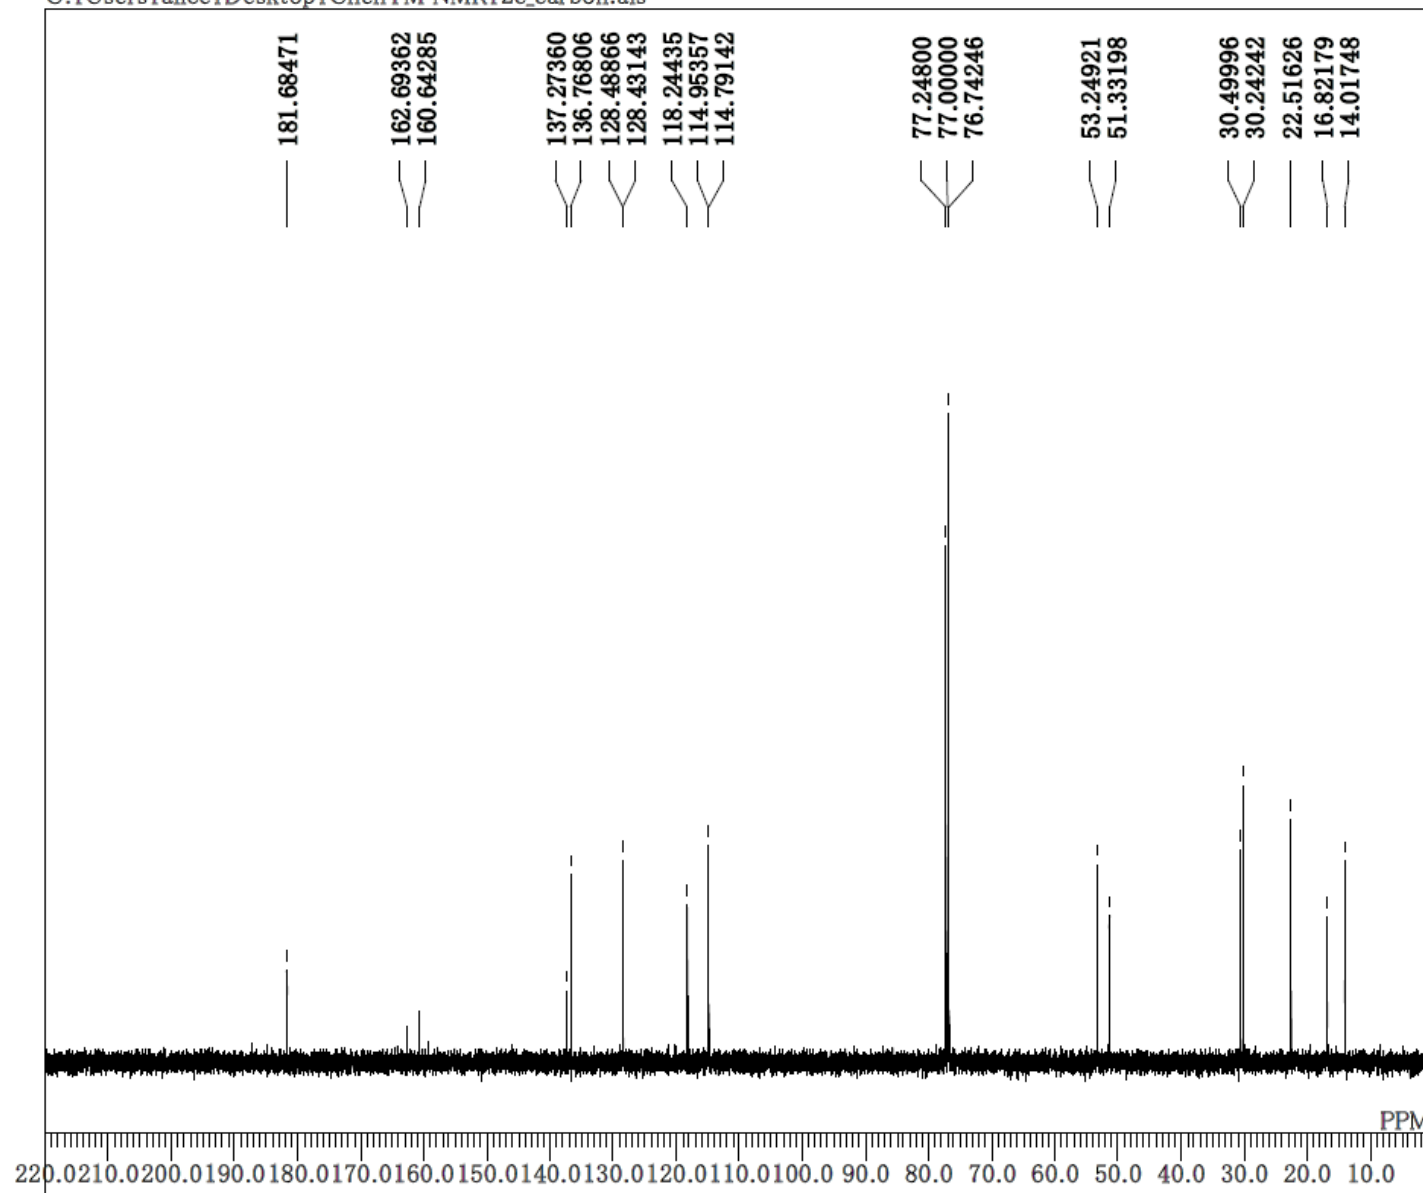

C:\Users\valice\Desktop\ChenTM NMR\2c\_F.als

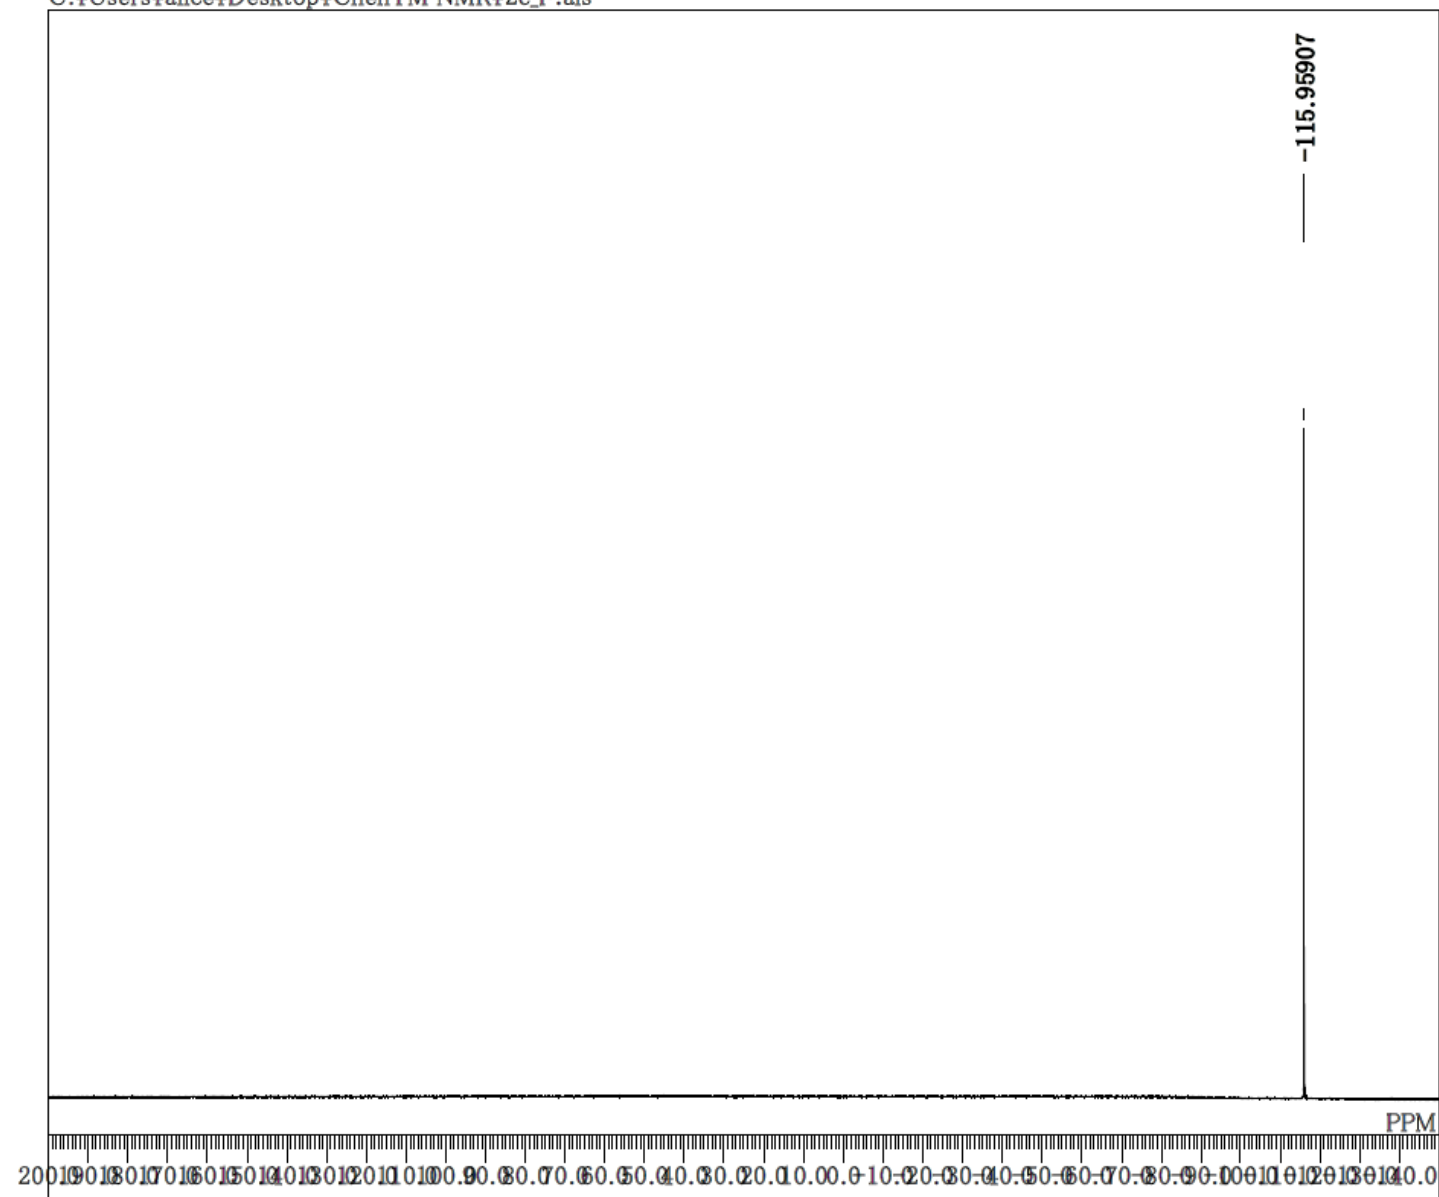

DFILE 2c\_F.als  
COMNT  
DATIM 2020-06-16 01:37:42  
OBNUC 19F  
EXMOD proton.jxp  
OBFRQ 368.64 MHz  
OBSET 7.63 KHz  
OBFIN 2.85 Hz  
POINT 13107  
FREQU 149253.73 Hz  
SCANS 16  
ACQTM 0.0878 sec  
PD 6.0000 sec  
PW1 4.10 usec  
IRNUC 19F  
CTEMP 21.0 c  
SLVNT CDCL3  
EXREF 0.00 ppm  
BF 0.12 Hz  
RGAIN 50

C:\Users\valice\Desktop\ChenTM NMR\2c'\_proton.als

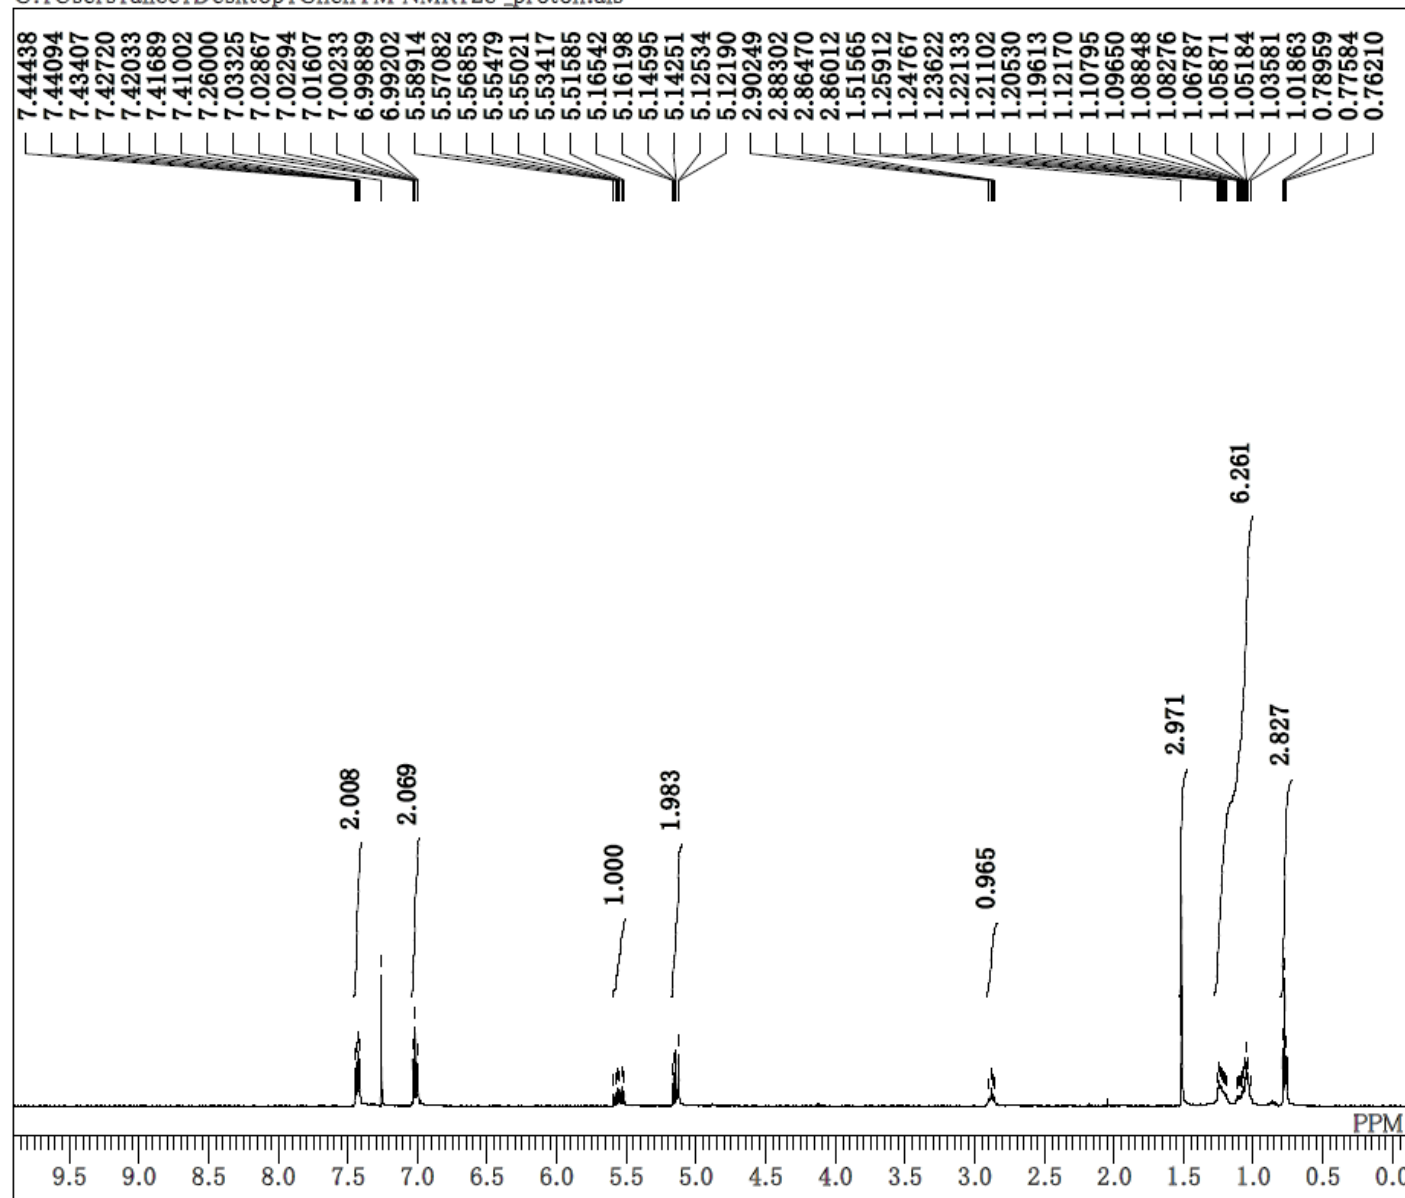

DFILE 2c'\_proton.als  
 COMNT  
 DATIM 2019-09-25 14:56:59  
 OBNUC 1H  
 EXMOD proton.jxp  
 OBFRQ 500.16 MHz  
 OBSET 2.41 KHz  
 OBFIN 6.01 Hz  
 POINT 13107  
 FREQU 7507.51 Hz  
 SCANS 8  
 ACQTM 1.7459 sec  
 PD 6.0000 sec  
 PW1 5.55 usec  
 IRNUC 1H  
 CTEMP 21.7 c  
 SLVNT CDCL3  
 EXREF 7.26 ppm  
 BF 0.12 Hz  
 RGAIN 42

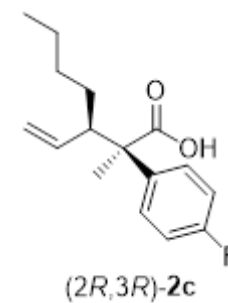

C:\Users\Valice\Desktop\ChenTM NMR\2c'\_carbon.als

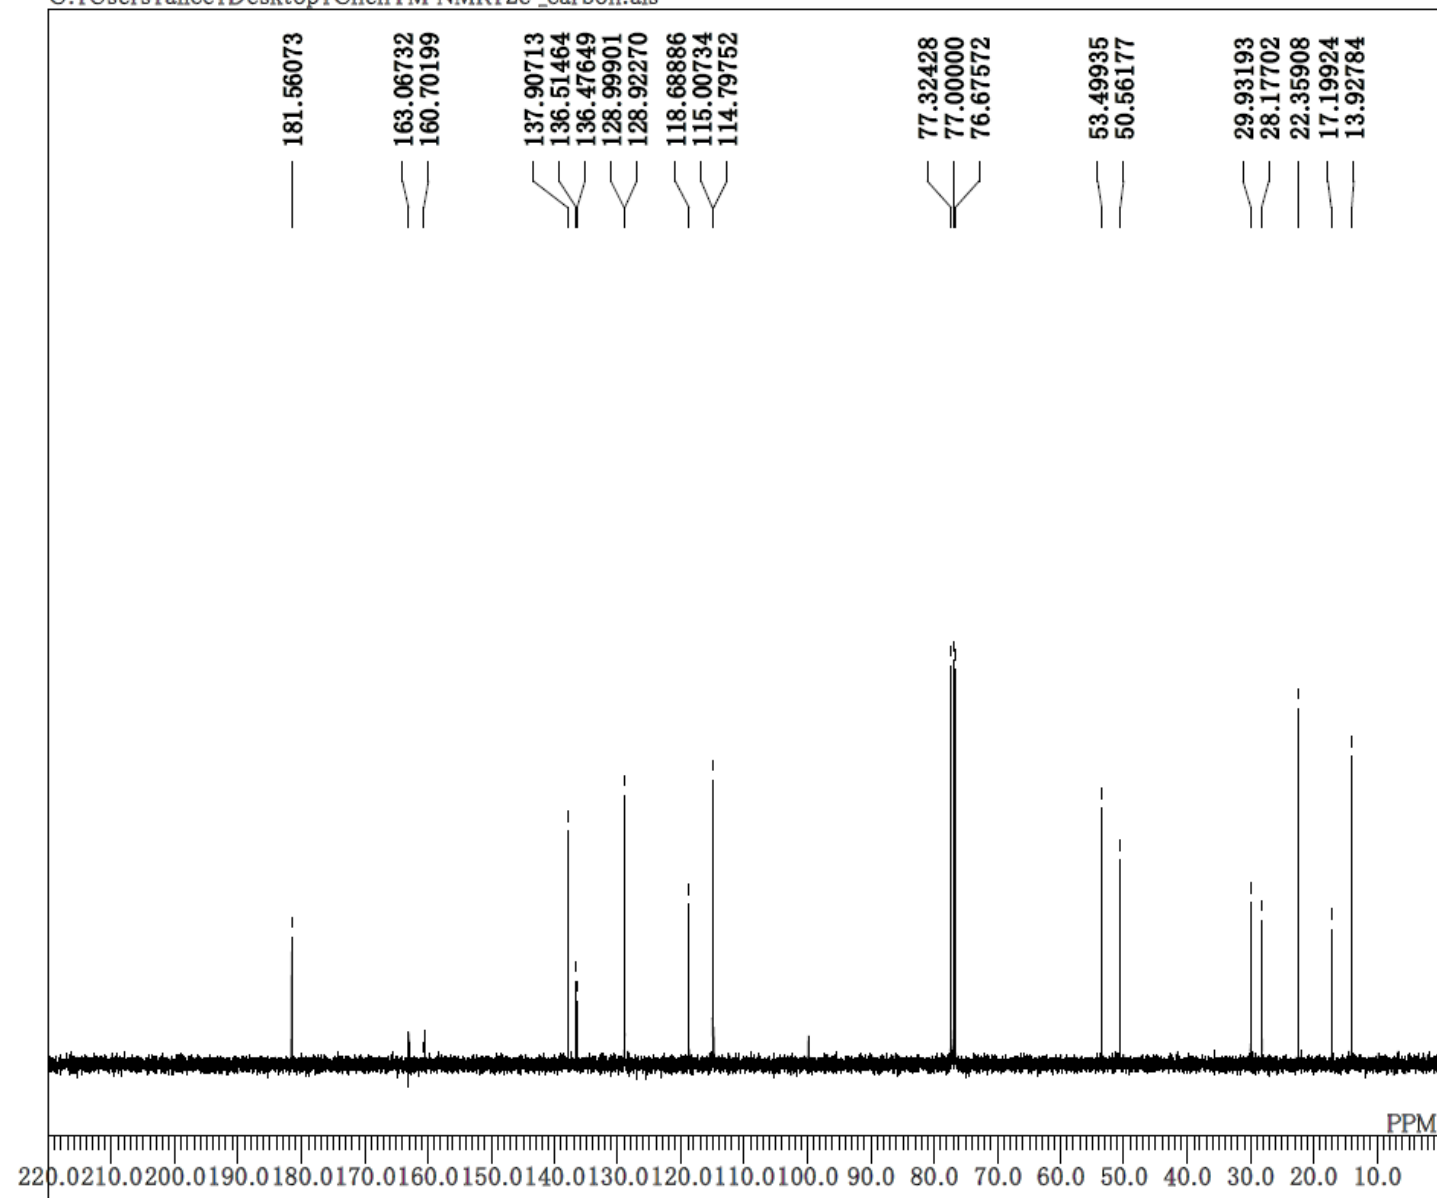

DFILE 2c'\_carbon.als  
 COMNT  
 DATIM 25-09-2019 17:00:49  
 OBNUC 13C  
 EXMOD carbon.jpg  
 OBFRQ 98.52 MHz  
 OBSET 4.64 KHz  
 OBFIN 8.74 Hz  
 POINT 26214  
 FREQU 24630.54 Hz  
 SCANS 105  
 ACQTM 1.0643 sec  
 PD 2.0000 sec  
 PW1 3.12 usec  
 IRNUC 1H  
 CTEMP 21.2 c  
 SLVNT CDCL3  
 EXREF 77.00 ppm  
 BF 0.12 Hz  
 RGAIN 60

C:\Users\Valice\Desktop\ChenTM NMR\2c'\_F.als

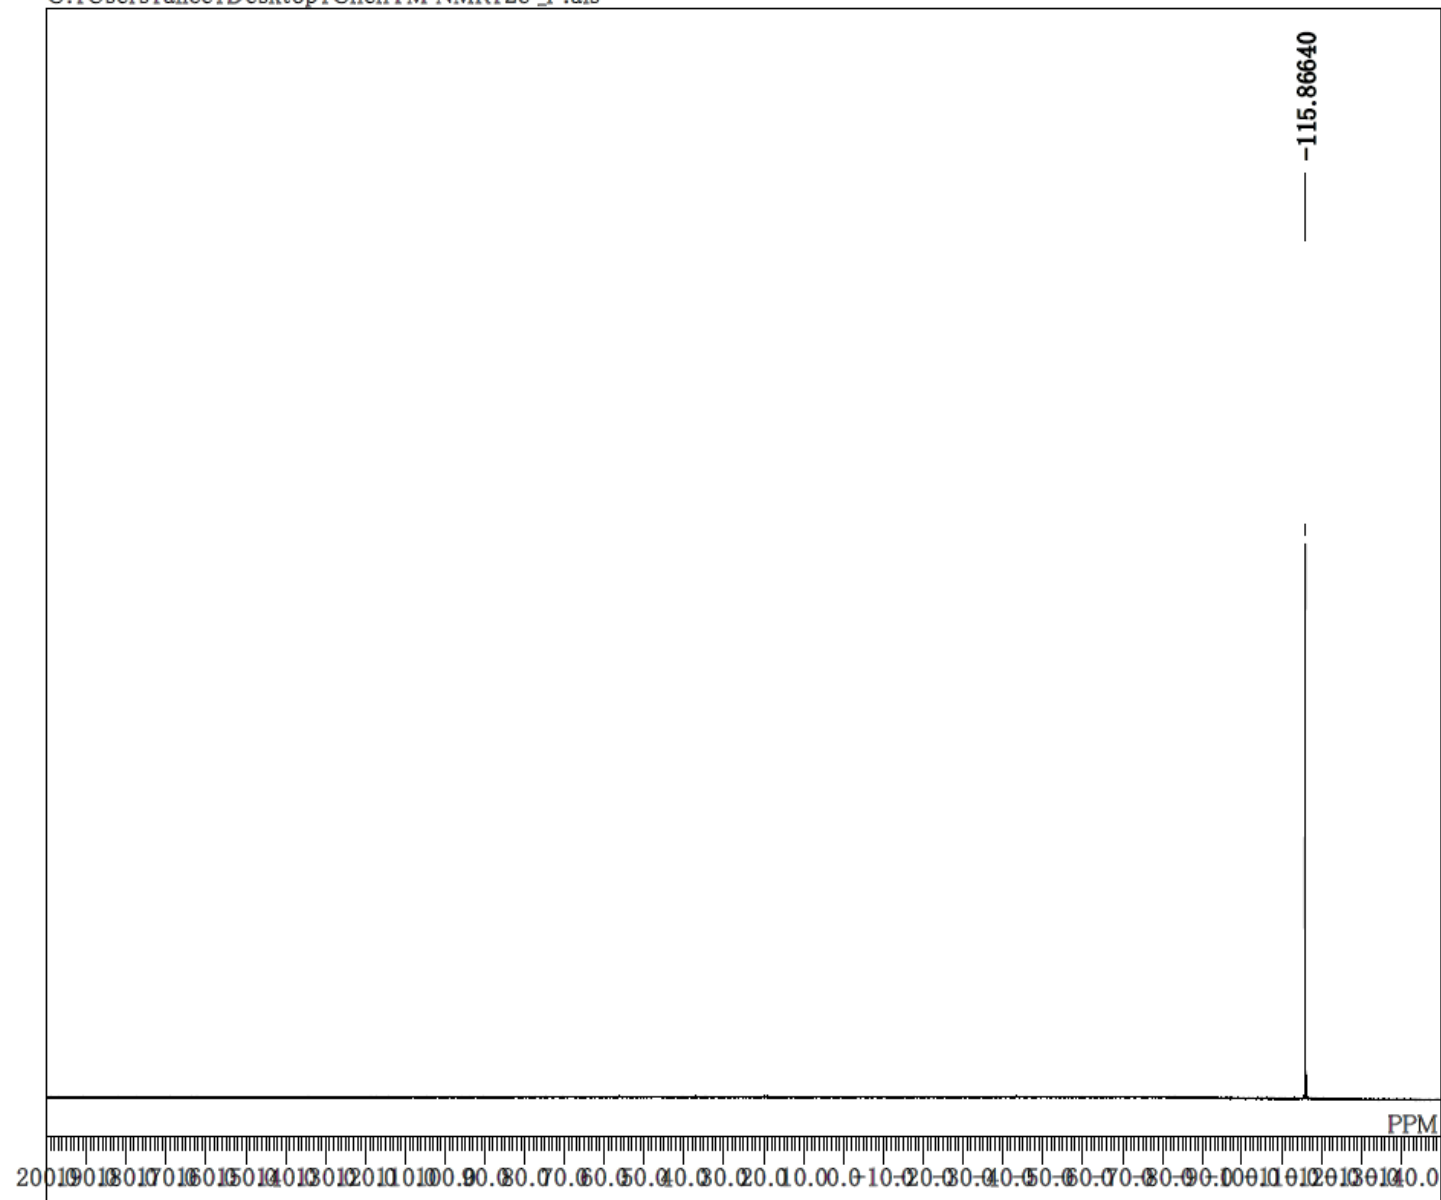

2c'\_F.als

|       |                     |
|-------|---------------------|
| DFILE | 2c'_F.als           |
| COMNT |                     |
| DATIM | 16-06-2020 02:03:46 |
| OBNUC | 19F                 |
| EXMOD | proton.jxp          |
| OBFRQ | 368.64 MHz          |
| OBSET | 7.63 KHz            |
| OBFIN | 2.85 Hz             |
| POINT | 13107               |
| FREQU | 149253.73 Hz        |
| SCANS | 16                  |
| ACQTM | 0.0878 sec          |
| PD    | 6.0000 sec          |
| PW1   | 4.10 usec           |
| IRNUC | 19F                 |
| CTEMP | 20.9 c              |
| SLVNT | CDCL3               |
| EXREF | 0.00 ppm            |
| BF    | 1.00 Hz             |
| RGAIN | 50                  |



C:\Users\Valice\Desktop\ChenTM NMR\2d\_proton.als

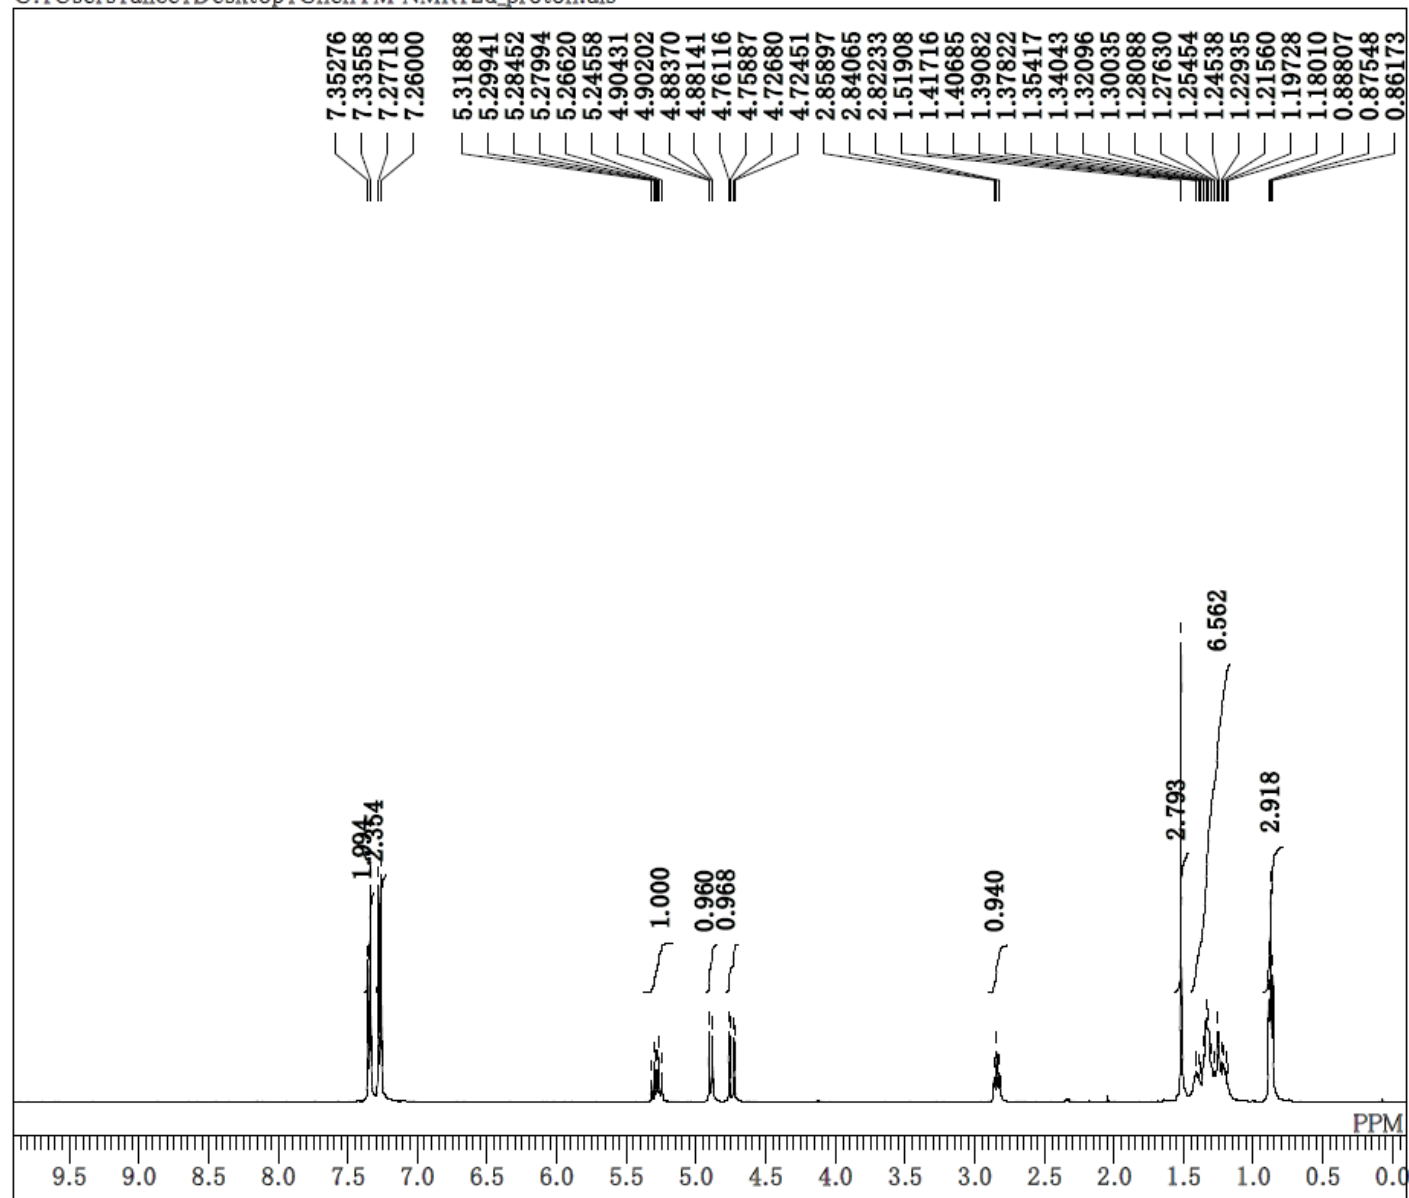

DFILE  
COMNT  
DATIM  
OBNUC  
EXMOD  
OBFRQ  
OBSET  
OBFIN  
POINT  
FREQU  
SCANS  
ACQTM  
PD  
PW1  
IRNUC  
CTEMP  
SLVNT  
EXREF  
BF  
RGAIN

2d\_proton.als  
2019-10-15 19:38:17  
1H  
proton.jxp  
500.16 MHz  
2.41 KHz  
6.01 Hz  
13107  
7507.51 Hz  
8  
1.7459 sec  
6.0000 sec  
5.55 usec  
1H  
21.8 c  
CDCL<sub>3</sub>  
7.26 ppm  
0.12 Hz  
40

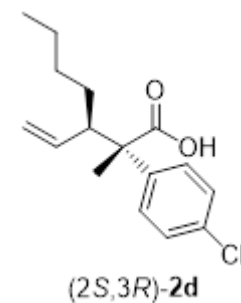

C:\Users\Valice\Desktop\ChenTM NMR\2d\_carbon.als

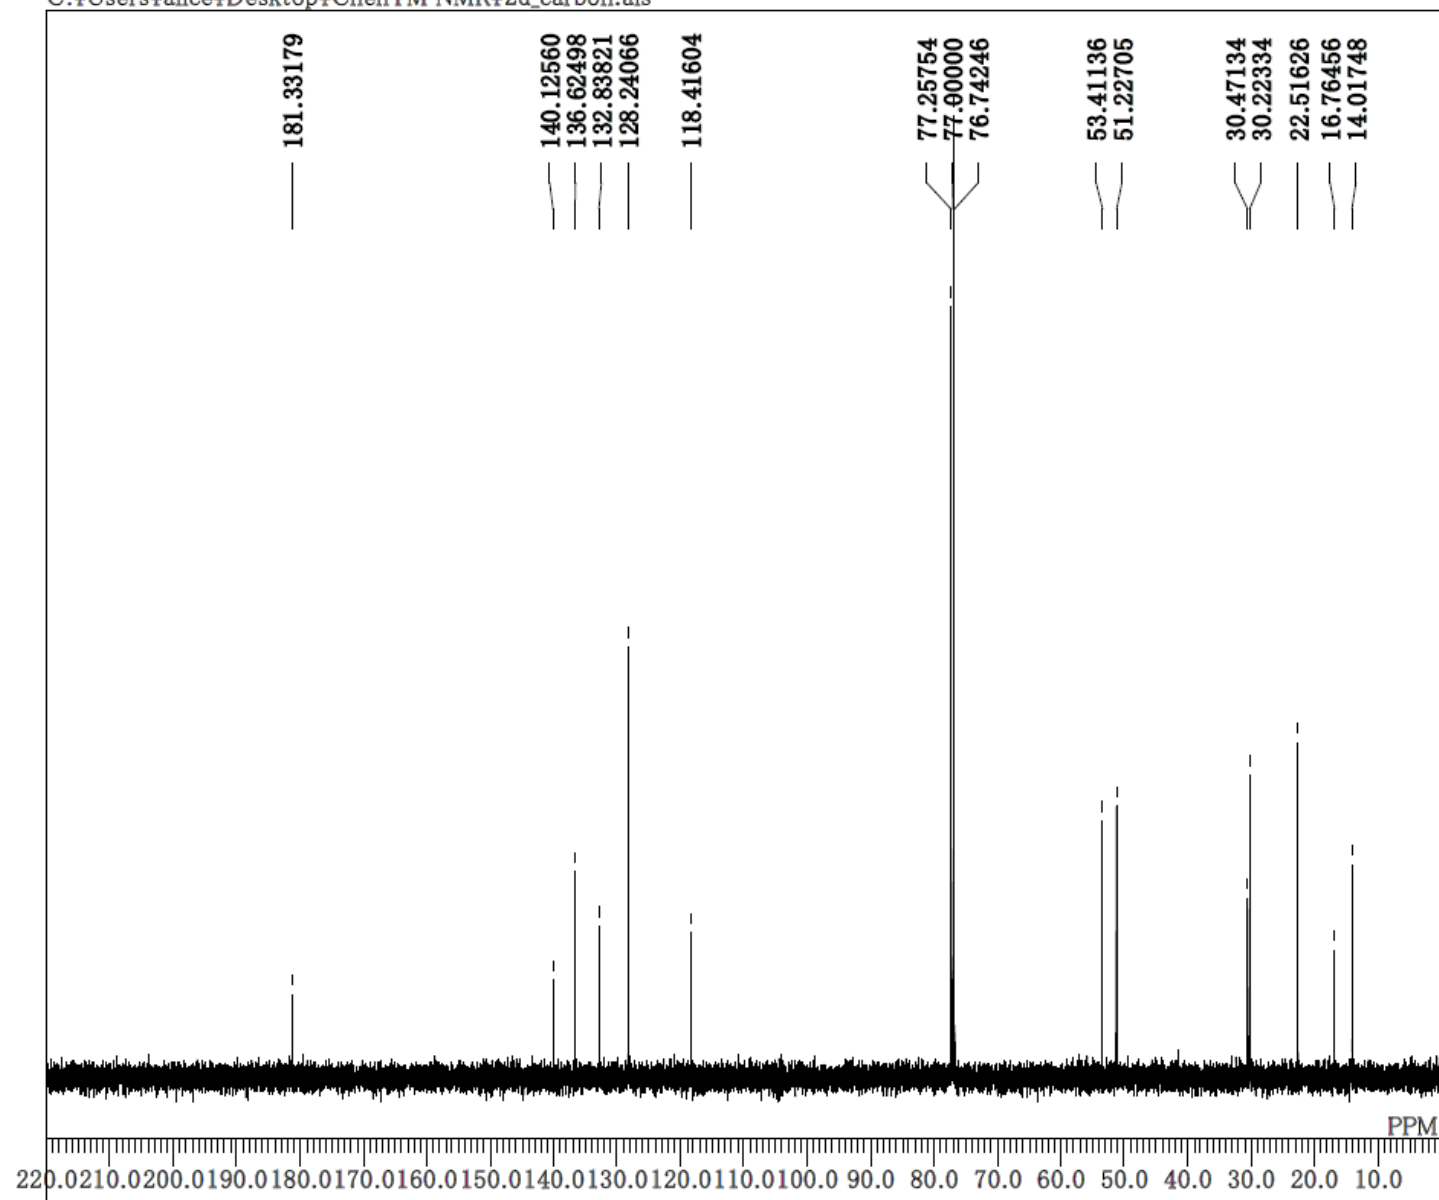

DFILE 2d\_carbon.als  
COMNT  
DATIM 2019-10-15 19:54:17  
OBNUC 13C  
EXMOD carbon.jxp  
OBFRQ 125.77 MHz  
OBSET 7.87 KHz  
OBFIN 4.21 Hz  
POINT 26214  
FREQU 31446.54 Hz  
SCANS 105  
ACQTM 0.8336 sec  
PD 2.0000 sec  
PW1 3.40 usec  
IRNUC 1H  
CTEMP 22.0 c  
SLVNT CDCL3  
EXREF 77.00 ppm  
BF 0.12 Hz  
RGAIN 60

C:\Users\valice\Desktop\ChenTM NMR\2d'\_proton.als

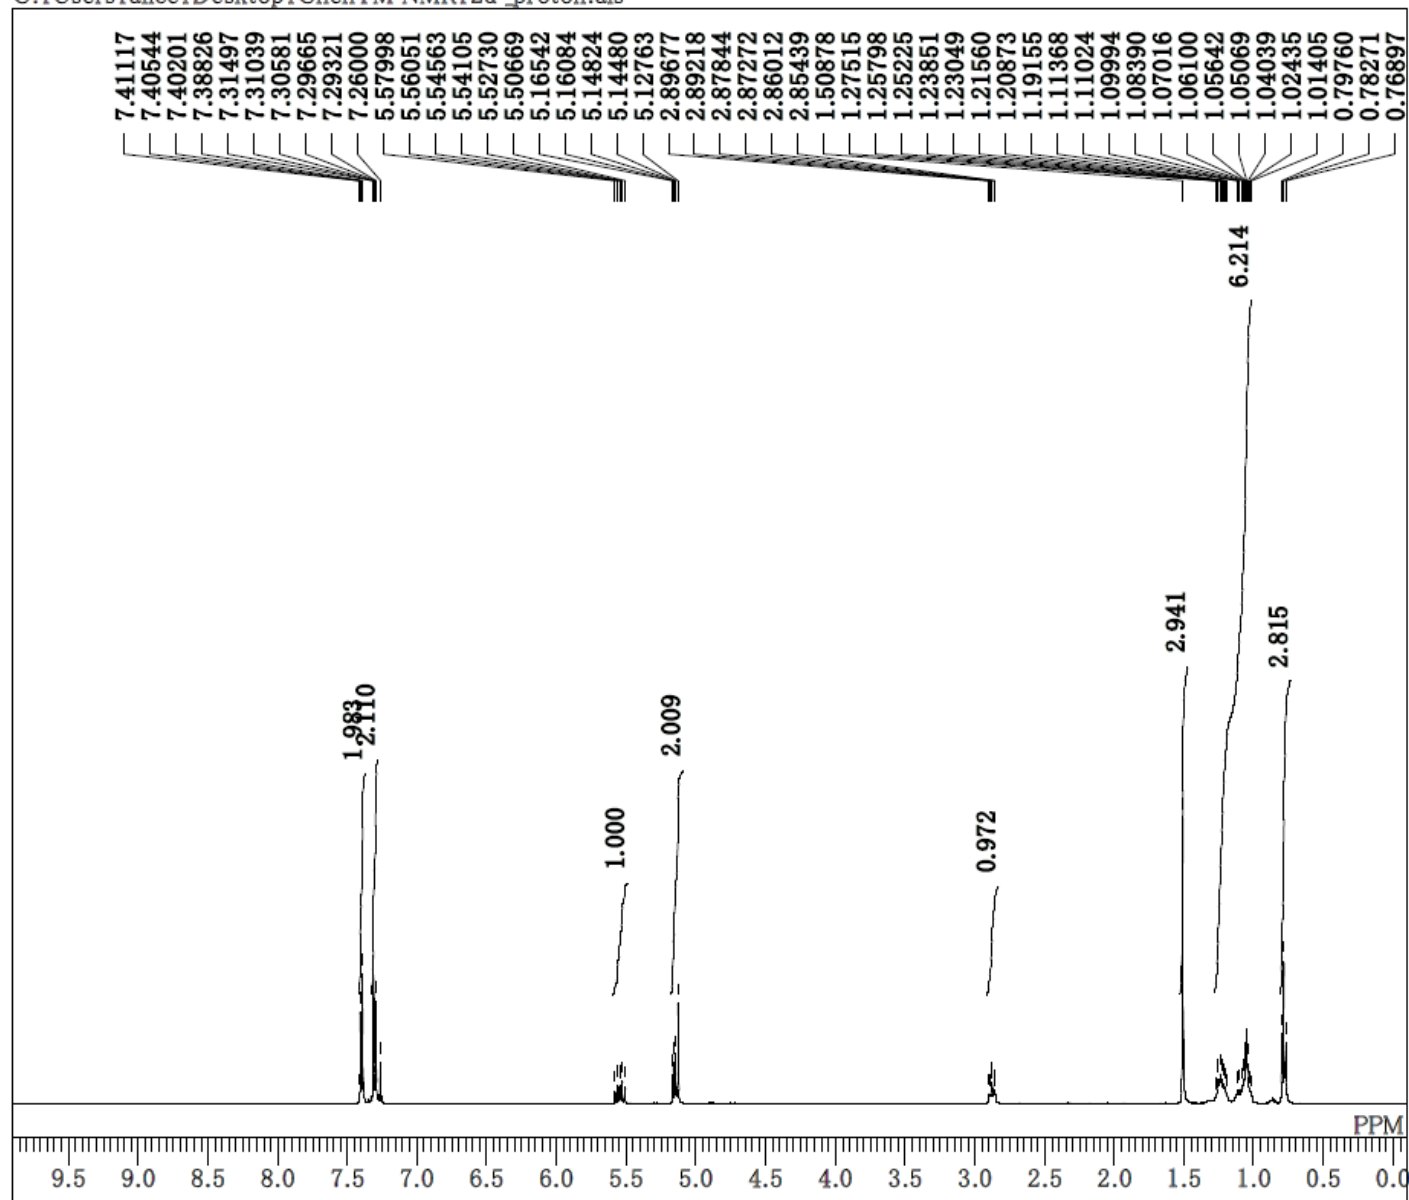

DFILE 2d'\_proton.als  
 COMNT  
 DATIM 2019-10-04 15:51:02  
 OBNUC 1H  
 EXMOD proton.jxp  
 OBFRQ 500.16 MHz  
 OBSET 2.41 KHz  
 OBFIN 6.01 Hz  
 POINT 13107  
 FREQU 7507.51 Hz  
 SCANS 8  
 ACQTM 1.7459 sec  
 PD 6.0000 sec  
 PW1 5.55 usec  
 IRNUC 1H  
 CTEMP 21.8 c  
 SLVNT CDCL3  
 EXREF 7.26 ppm  
 BF 0.12 Hz  
 RGAIN 40

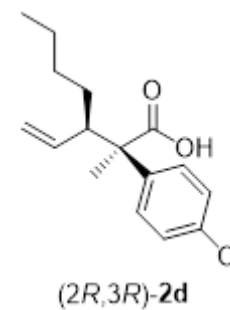

C:\Users\alice\Desktop\ChenTM NMR\2d'\_carbon.als

DFILE 2d'\_carbon.als  
 COMNT  
 DATIM 04-10-2019 19:12:18  
 OBNUC 13C  
 EXMOD carbon.jpg  
 OBFRQ 98.52 MHz  
 OBSET 4.64 KHz  
 OBFIN 8.74 Hz  
 POINT 26214  
 FREQU 24630.54 Hz  
 SCANS 90  
 ACQTM 1.0643 sec  
 PD 2.0000 sec  
 PW1 3.12 usec  
 IRNUC 1H  
 CTEMP 21.1 c  
 SLVNT CDCL3  
 EXREF 77.00 ppm  
 BF 0.12 Hz  
 RGAIN 60

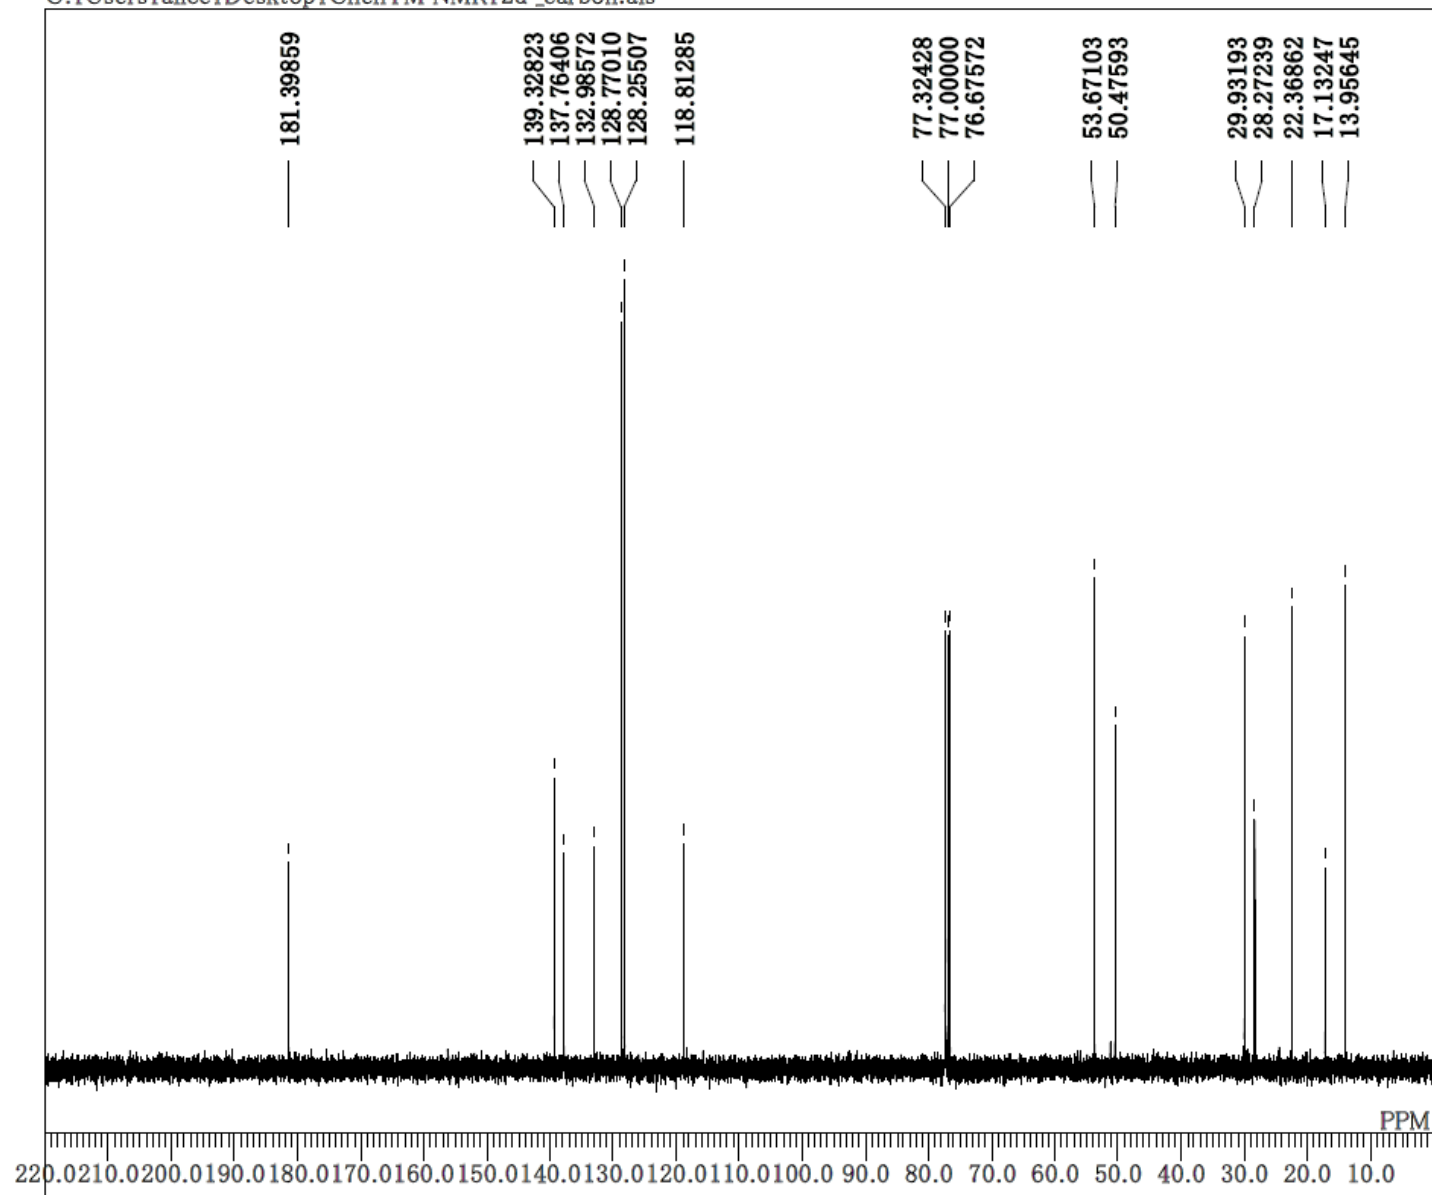

C:\Users\Valice\Desktop\ChenTM NMR\2e\_proton.als

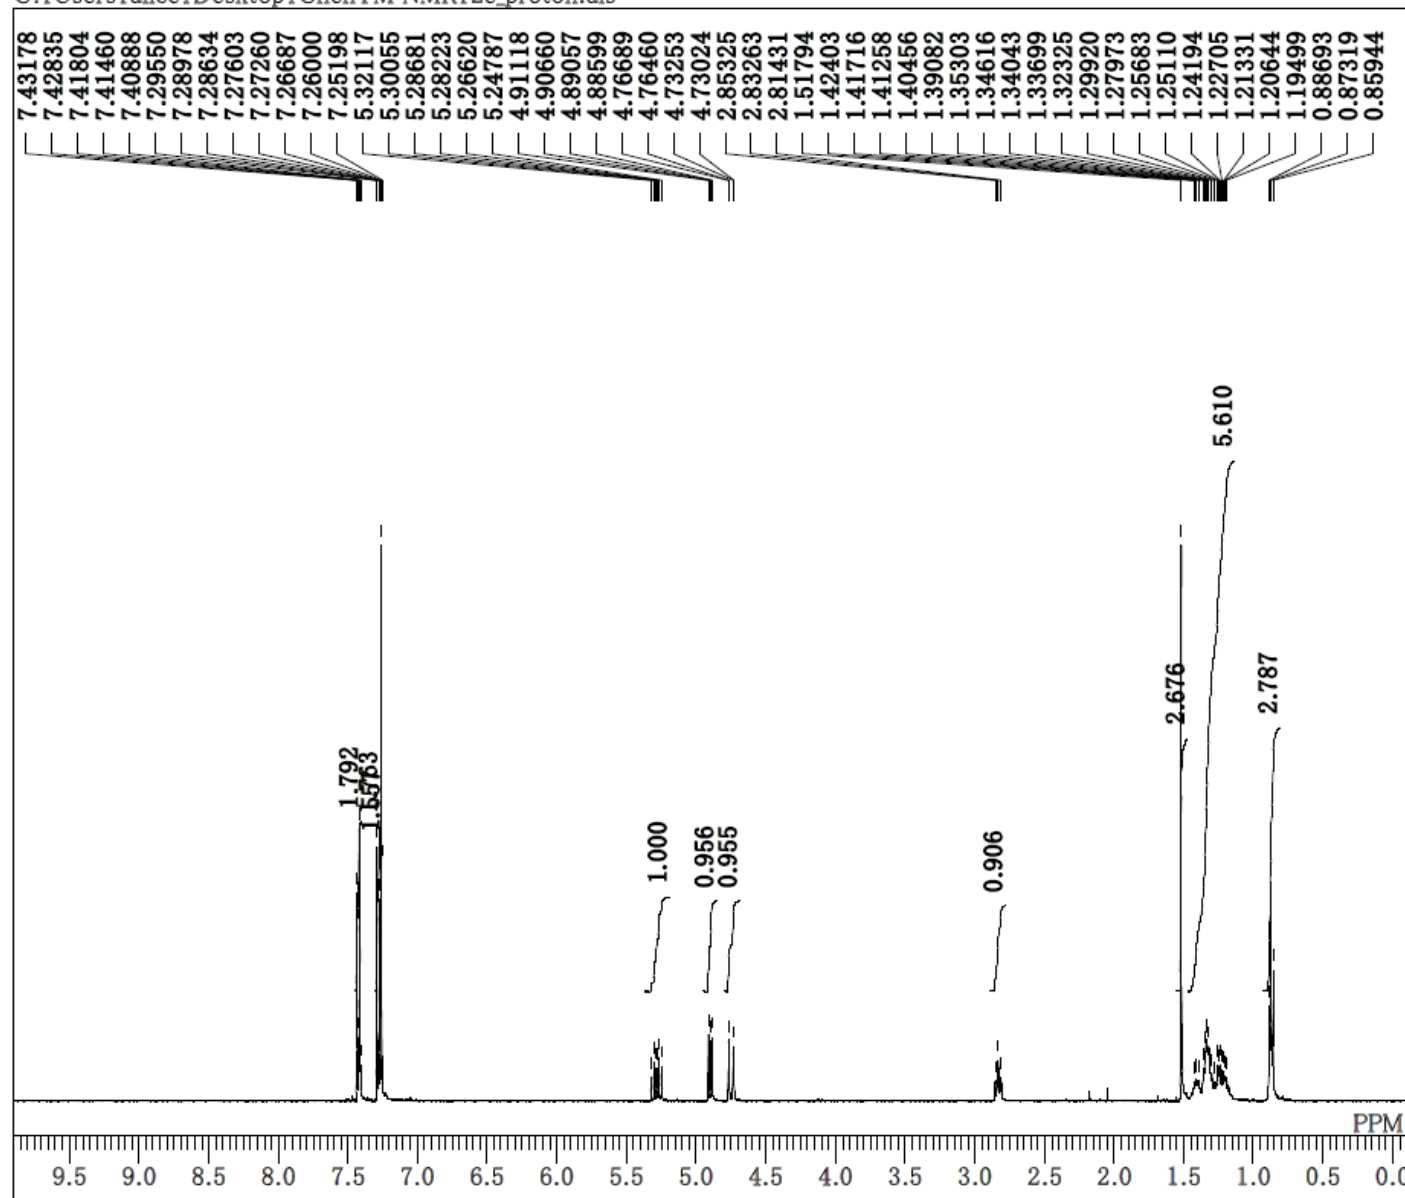

DFILE 2e\_proton.als  
 COMNT  
 DATIM 2019-11-18 21:00:17  
 OBNUC 1H  
 EXMOD proton.jxp  
 OBFRQ 500.16 MHz  
 OBSET 2.41 KHz  
 OBFIN 6.01 Hz  
 POINT 13107  
 FREQU 7507.51 Hz  
 SCANS 8  
 ACQTM 1.7459 sec  
 PD 6.0000 sec  
 PW1 5.55 usec  
 IRNUC 1H  
 CTEMP 21.5 c  
 SLVNT CDCL3  
 EXREF 7.26 ppm  
 BF 0.12 Hz  
 RGAIN 42

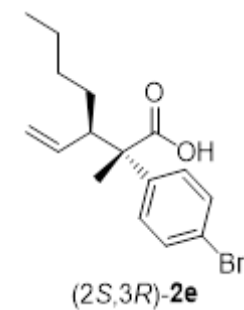

C:\Users\Valice\Desktop\ChenTM NMR\2e\_carbon.als

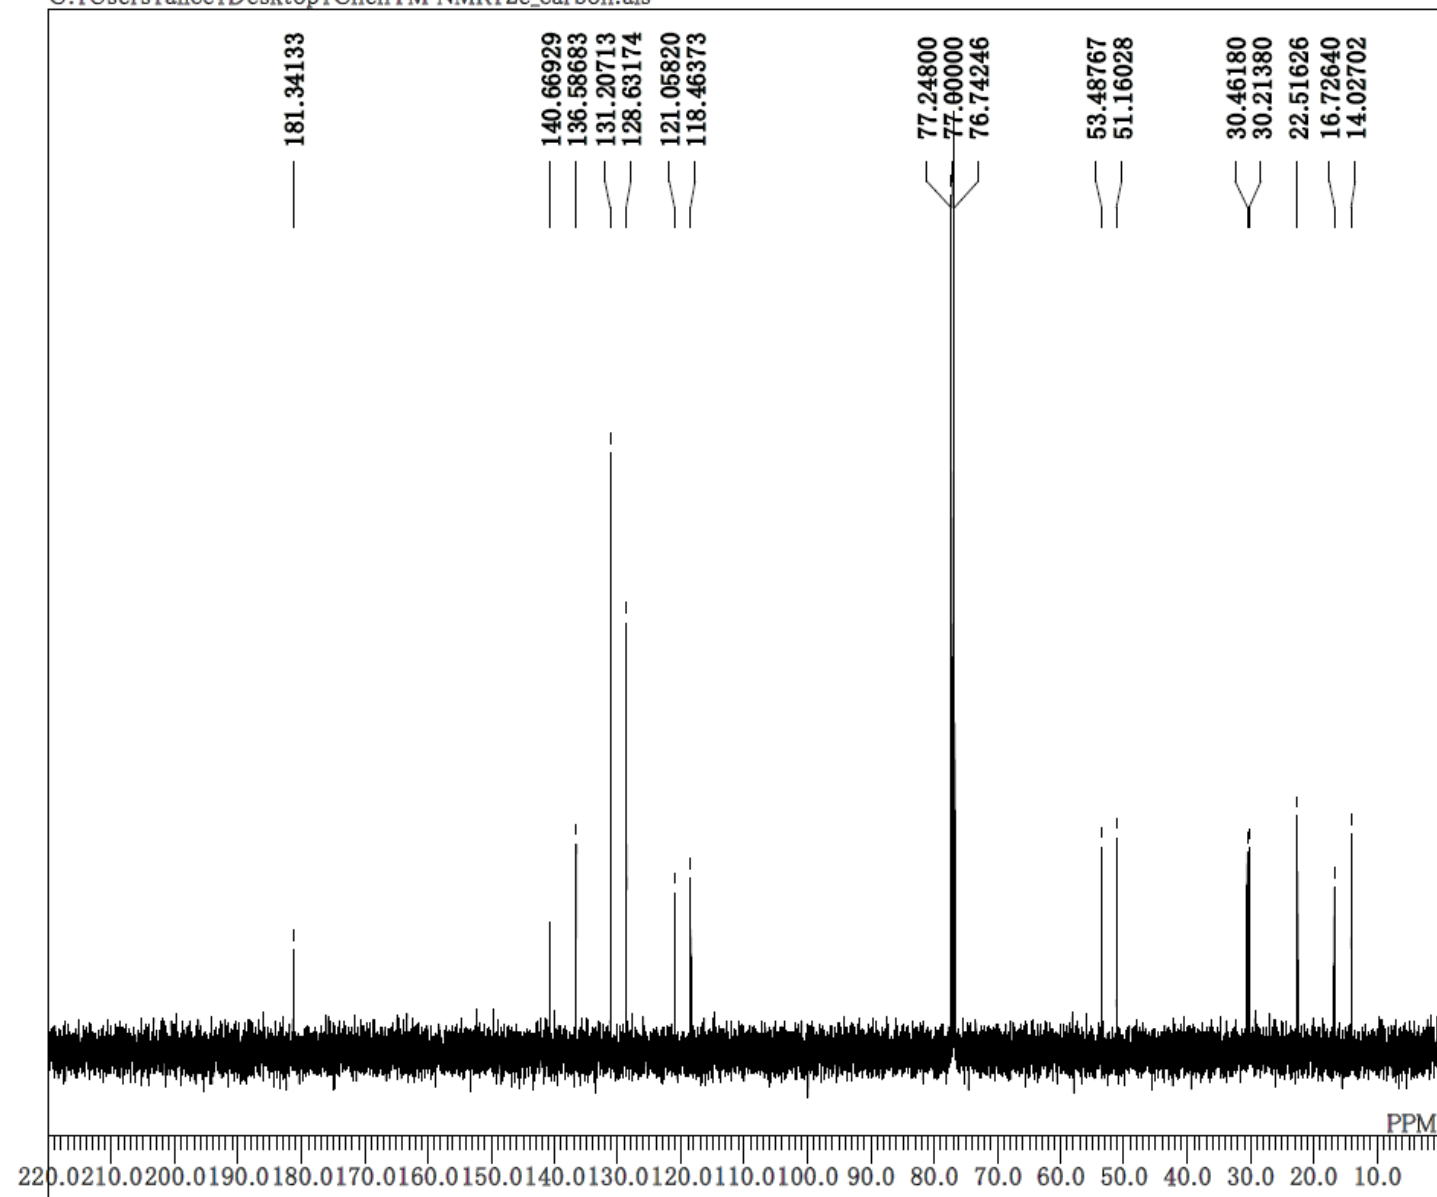

DFILE 2e\_carbon.als  
 COMNT  
 DATIM 2019-11-18 21:04:50  
 OBNUC 13C  
 EXMOD carbon.jxp  
 OBFRQ 125.77 MHz  
 OBSET 7.87 KHz  
 OBFIN 4.21 Hz  
 POINT 26214  
 FREQU 31446.54 Hz  
 SCANS 125  
 ACQTM 0.8336 sec  
 PD 2.0000 sec  
 PW1 3.40 usec  
 IRNUC 1H  
 CTEMP 22.4 c  
 SLVNT CDCL3  
 EXREF 77.00 ppm  
 BF 0.12 Hz  
 RGAIN 60

C:\Users\valice\Desktop\ChenTM NMR\2e'\_proton.als

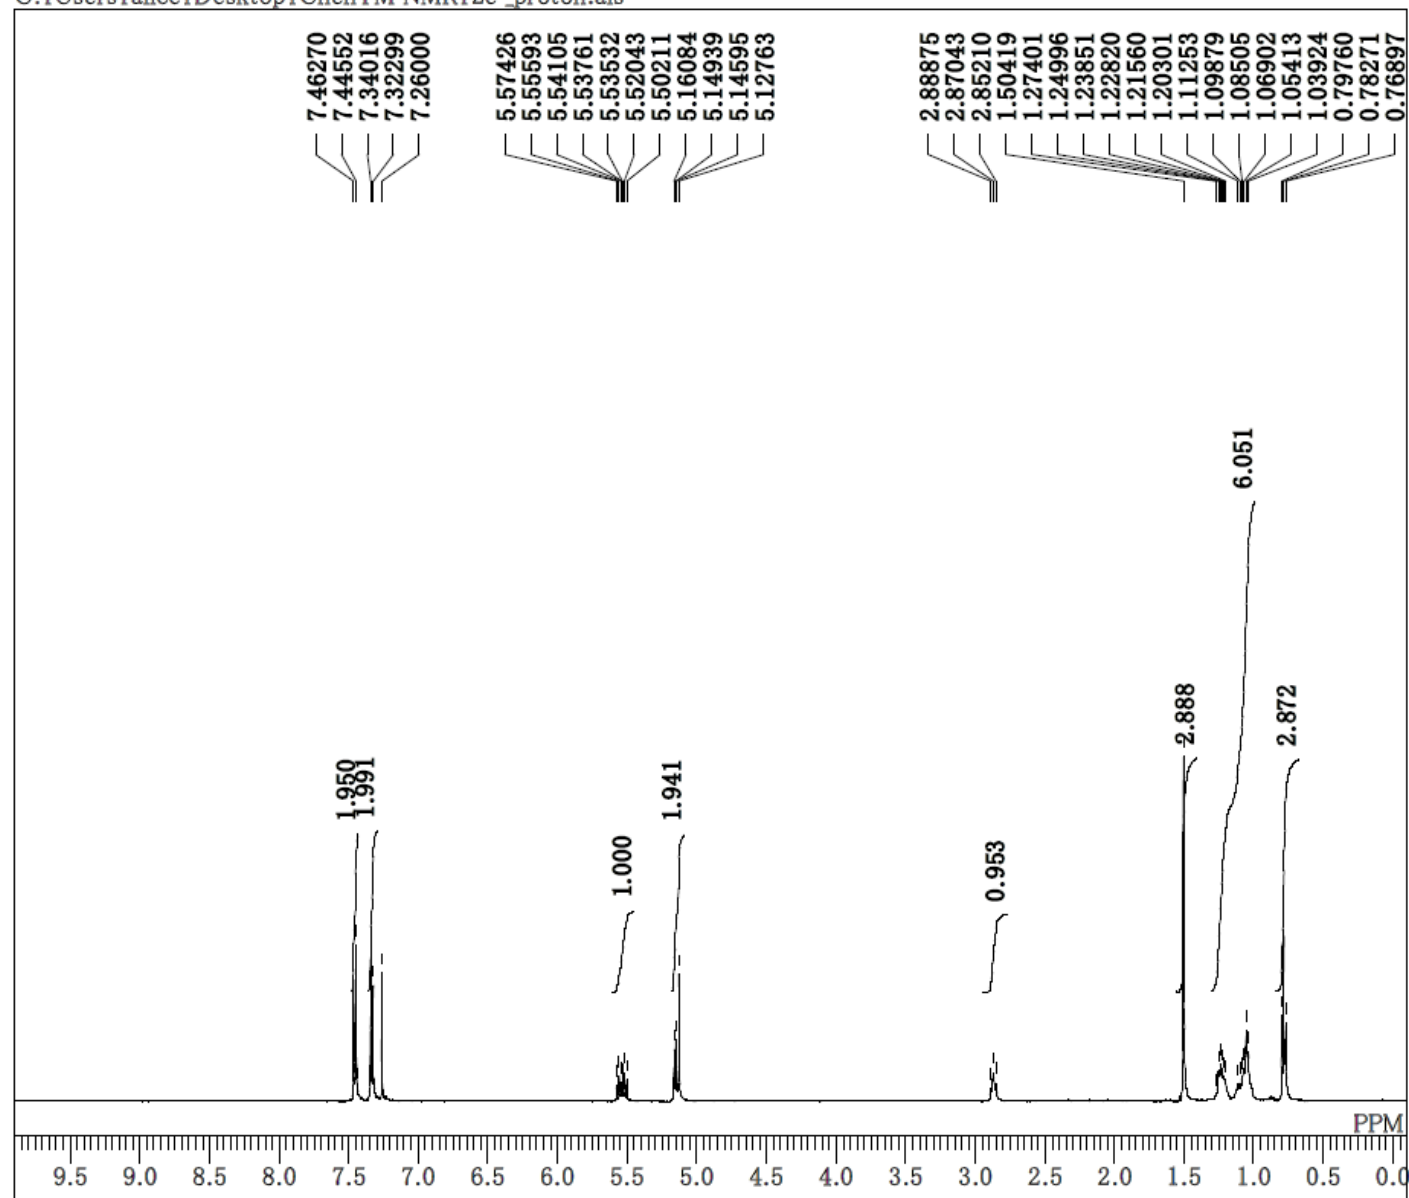

DFILE 2e'\_proton.als  
 COMNT  
 DATIM 2019-12-06 22:29:55  
 OBNUC 1H  
 EXMOD proton.jxp  
 OBFRQ 500.16 MHz  
 OBSET 2.41 KHz  
 OBFIN 6.01 Hz  
 POINT 13107  
 FREQU 7507.51 Hz  
 SCANS 8  
 ACQTM 1.7459 sec  
 PD 6.0000 sec  
 PW1 5.55 usec  
 IRNUC 1H  
 CTEMP 21.3 c  
 SLVNT CDCL3  
 EXREF 7.26 ppm  
 BF 0.12 Hz  
 RGAIN 42

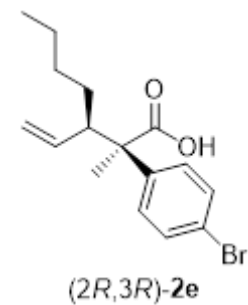

C:\Users\Valice\Desktop\ChenTM NMR\2e'\_carbon.als

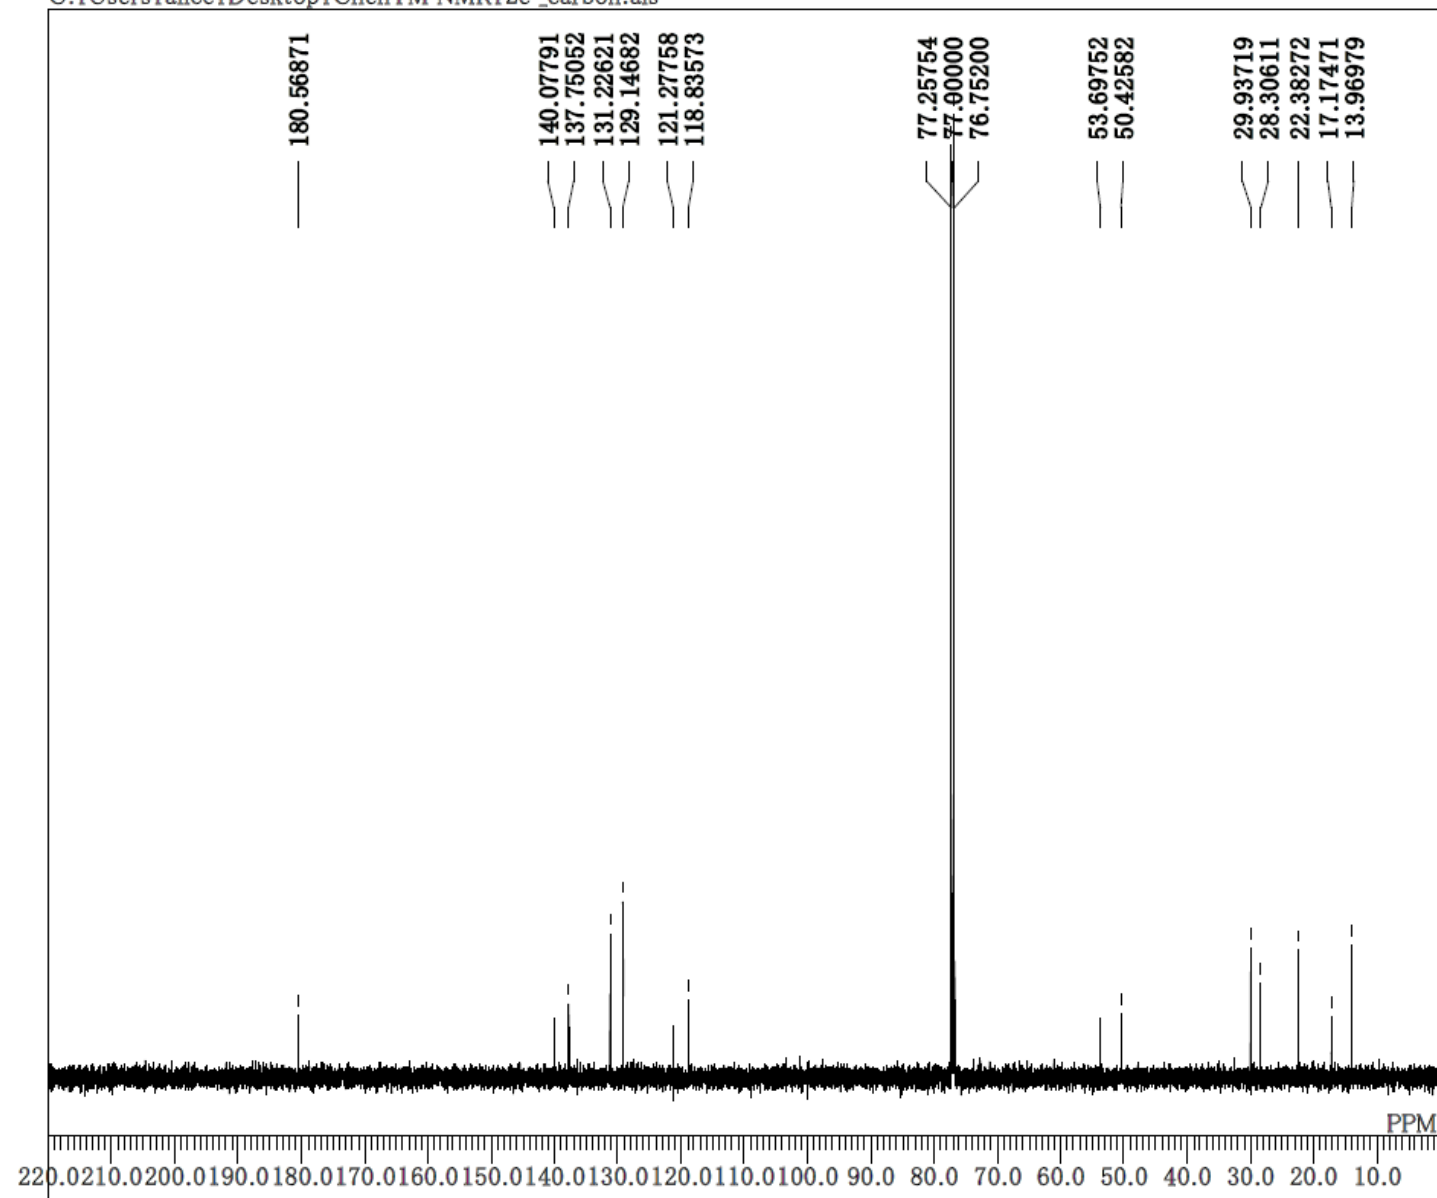

DFILE 2e'\_carbon.als  
 COMNT  
 DATIM 2019-12-06 22:36:18  
 OBNUC 13C  
 EXMOD carbon.jxp  
 OBFRQ 125.77 MHz  
 OBSET 7.87 KHz  
 OBFIN 4.21 Hz  
 POINT 26214  
 FREQU 31446.54 Hz  
 SCANS 298  
 ACQTM 0.8336 sec  
 PD 2.0000 sec  
 PW1 3.40 usec  
 IRNUC 1H  
 CTEMP 21.8 c  
 SLVNT CDCL3  
 EXREF 77.00 ppm  
 BF 0.12 Hz  
 RGAIN 60



C:\Users\Valice\Desktop\ChenTM NMR\2f\_proton.als

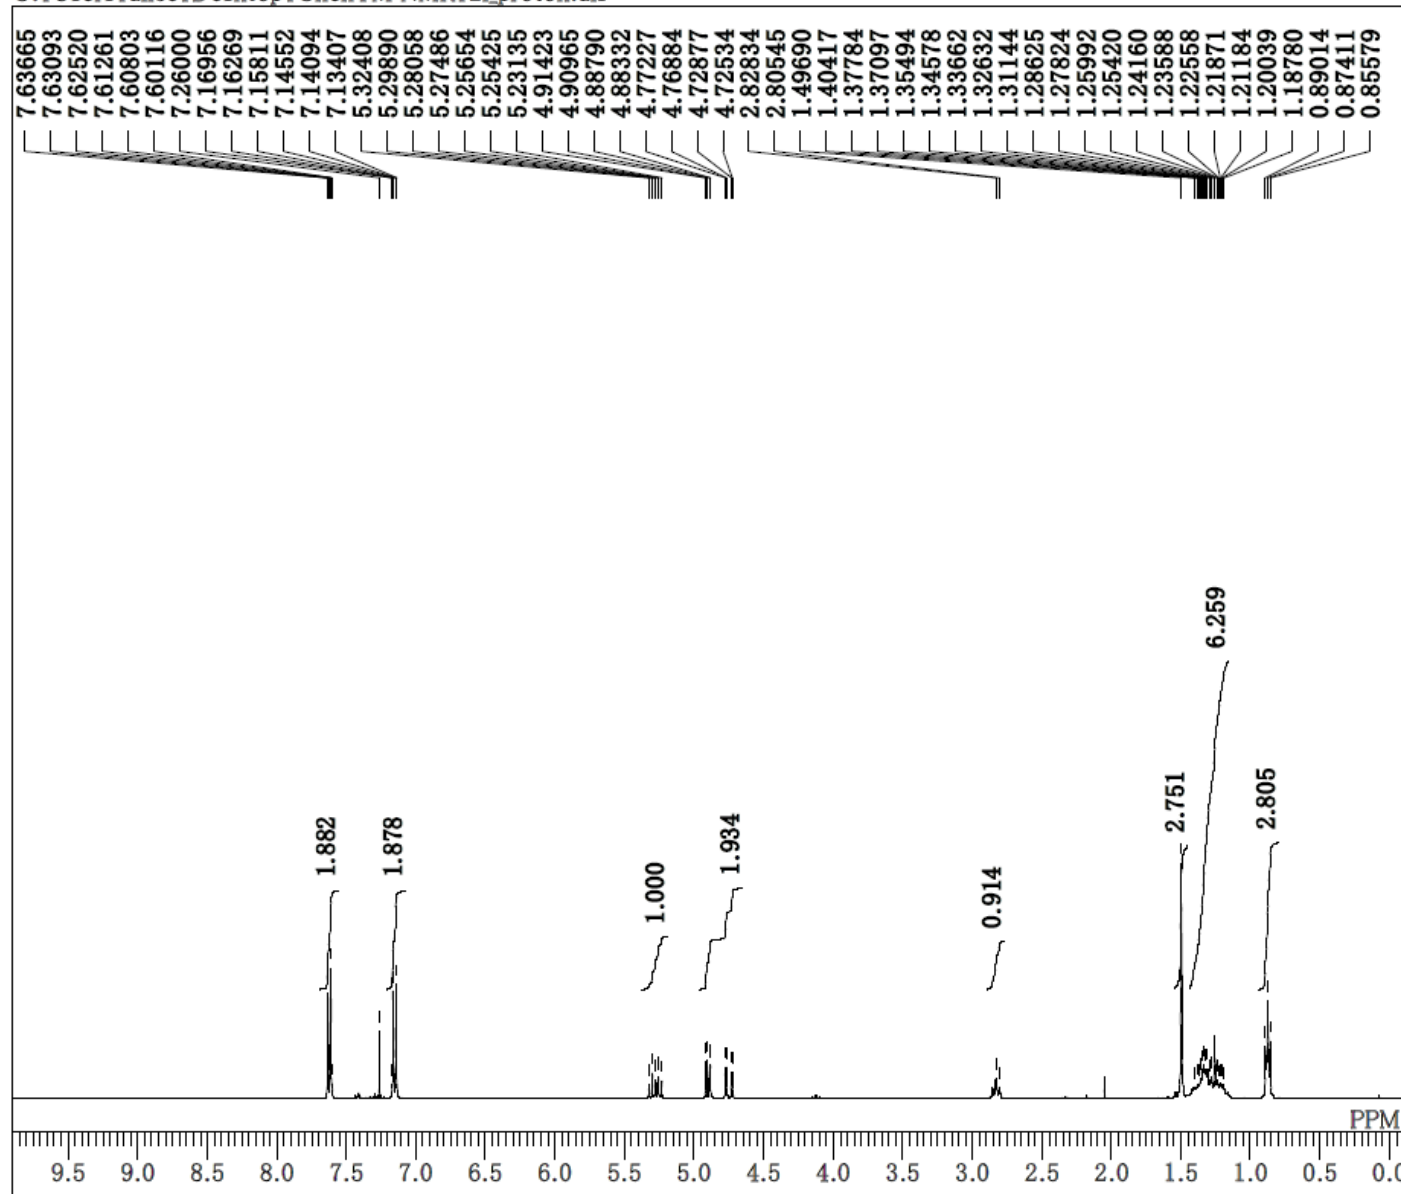

DFILE  
COMNT  
DATIM  
OBNUC  
EXMOD  
OBFRQ  
OBSET  
OBFIN  
POINT  
FREQU  
SCANS  
ACQTM  
PD  
PW1  
IRNUC  
CTEMP  
SLVNT  
EXREF  
BF  
RGAIN

2f\_proton.als  
27-11-2019 15:12:13  
1H  
proton.jxp  
391.78 MHz  
8.51 KHz  
3.34 Hz  
13107  
5878.90 Hz  
8  
2.2295 sec  
6.0000 sec  
5.17 usec  
1H  
19.9 c  
CDCL3  
7.26 ppm  
0.12 Hz  
36

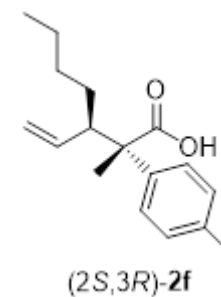

C:\Users\Yalice\Desktop\ChenTM NMR\2f\_carbon.als

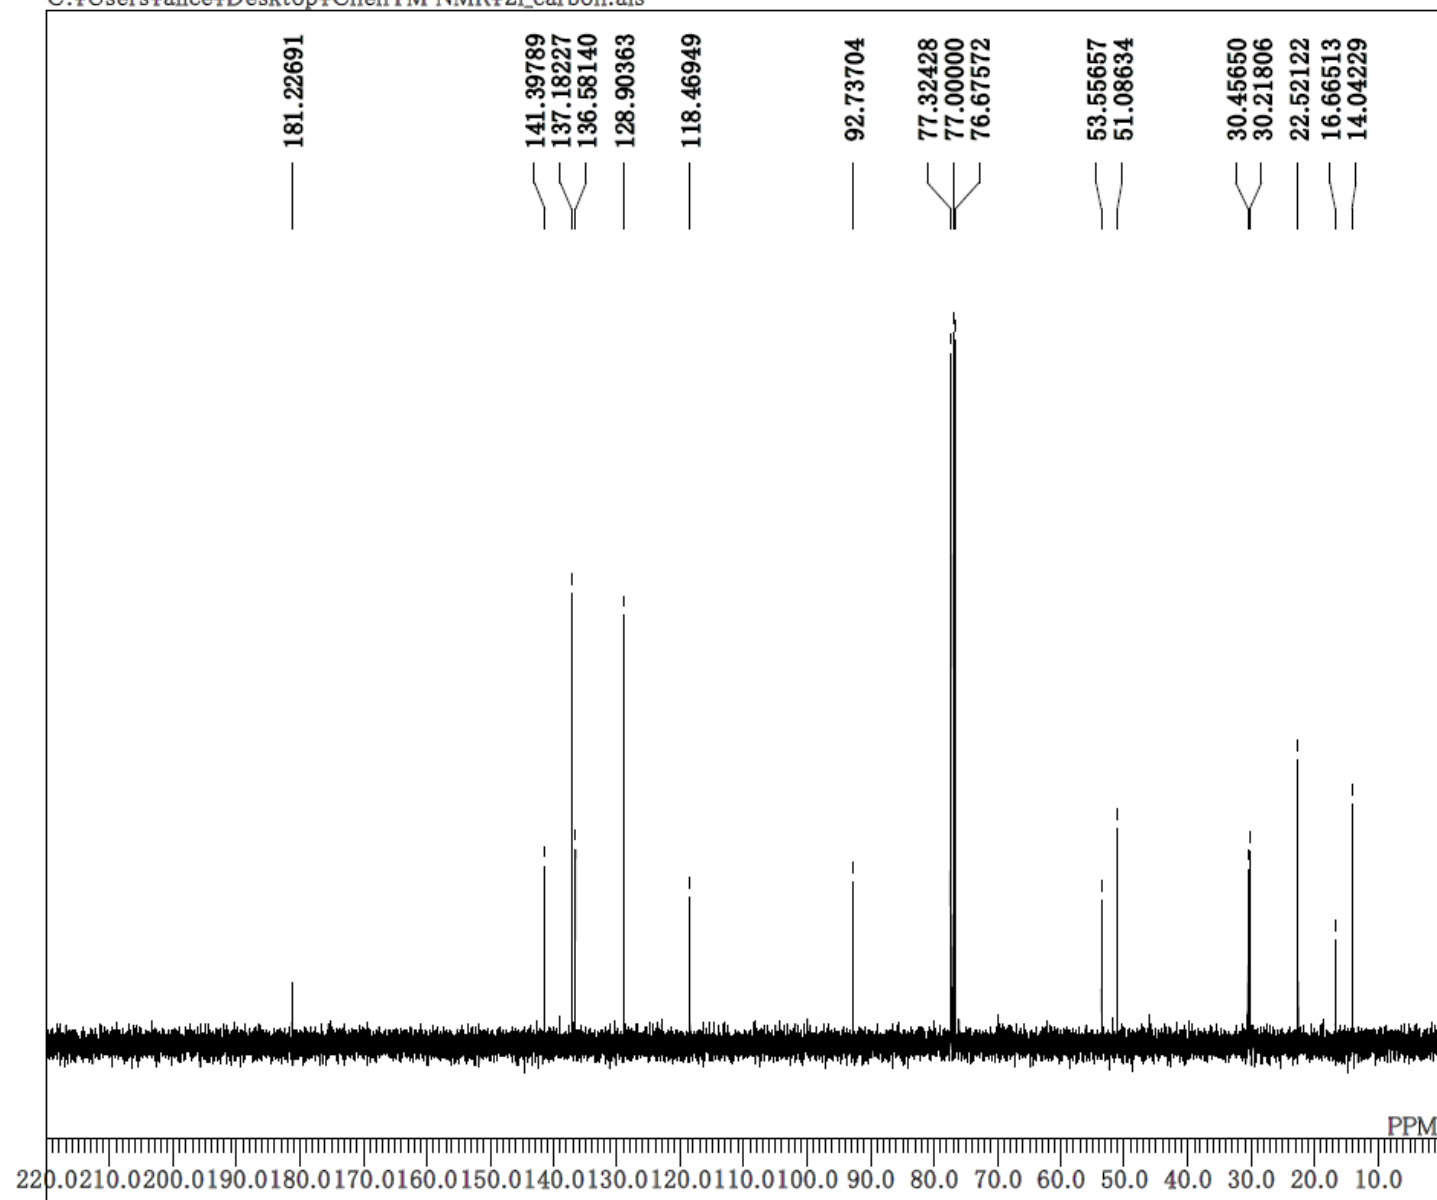

DFILE 2f\_carbon.als  
 COMNT  
 DATIM 27-11-2019 15:49:28  
 OBNUC 13C  
 EXMOD carbon.jpg  
 OBFRQ 98.52 MHz  
 OBSET 4.64 KHz  
 OBFIN 8.74 Hz  
 POINT 26214  
 FREQU 24630.54 Hz  
 SCANS 110  
 ACQTM 1.0643 sec  
 PD 2.0000 sec  
 PW1 3.12 usec  
 IRNUC 1H  
 CTEMP 20.4 c  
 SLVNT CDCL3  
 EXREF 77.00 ppm  
 BF 0.12 Hz  
 RGAIN 60

C:\Users\valice\Desktop\ChenTM NMR\2f\_proton.als

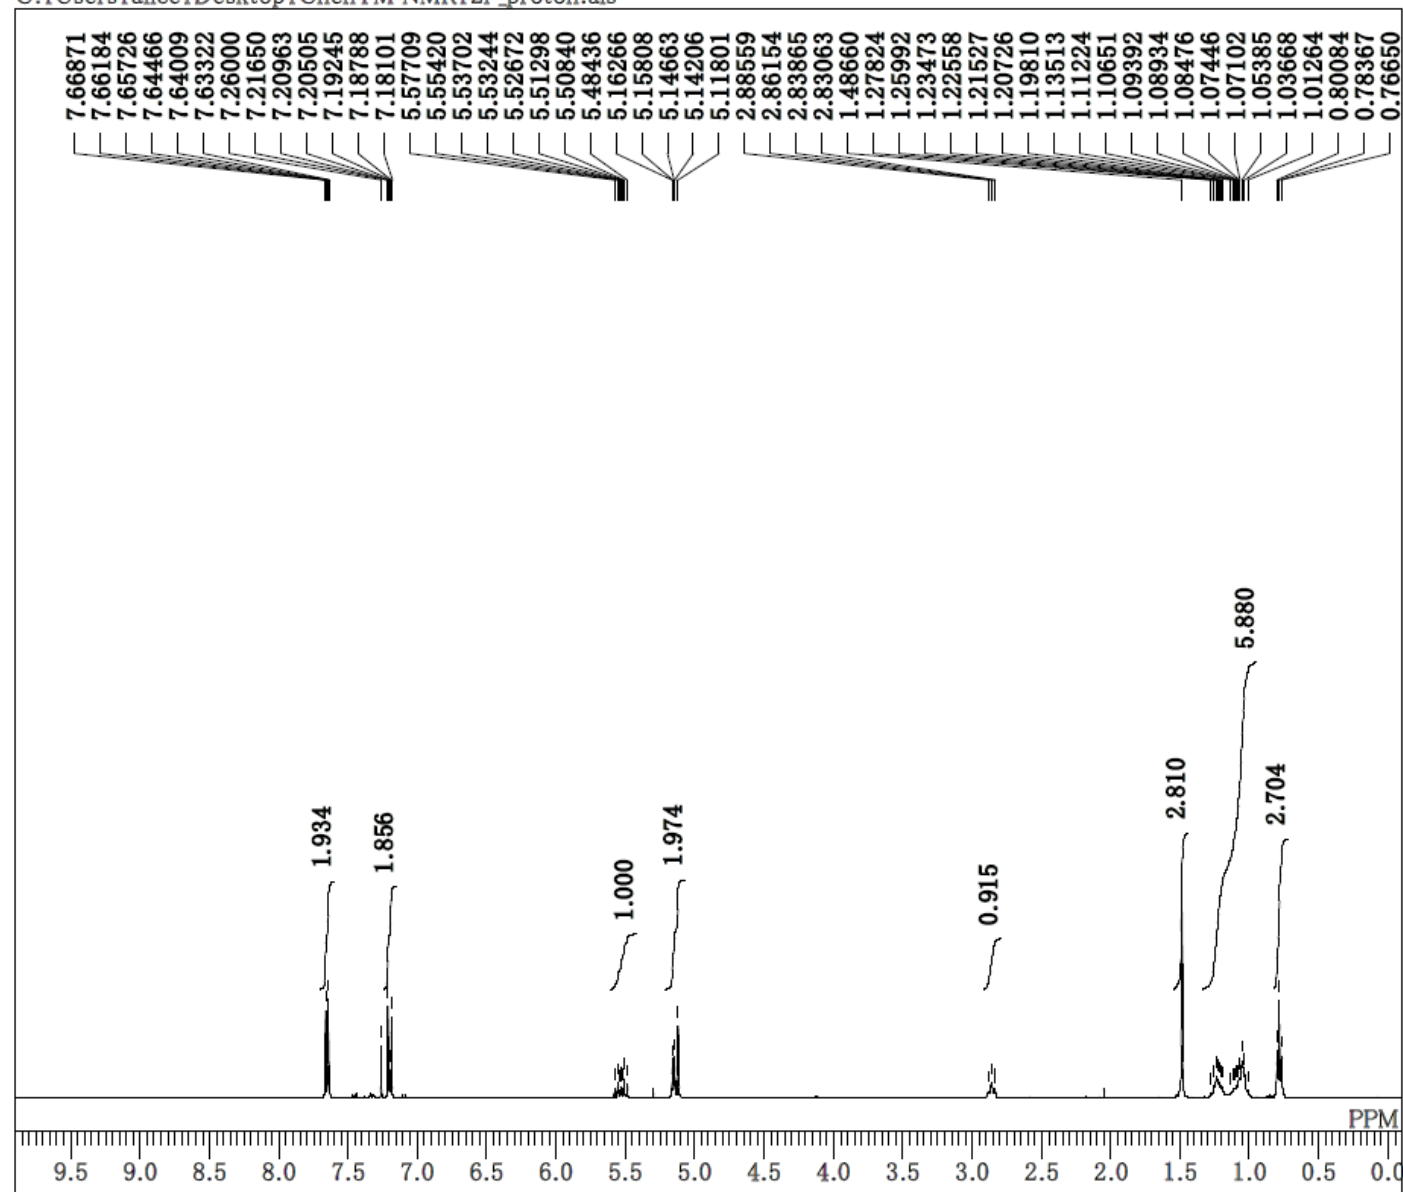

DFILE 2f\_proton.als  
 COMNT  
 DATIM 27-11-2019 15:19:32  
 OBNUC 1H  
 EXMOD proton.jpg  
 OBFRQ 391.78 MHz  
 OBSET 8.51 KHz  
 OBFIN 3.34 Hz  
 POINT 13107  
 FREQU 5878.90 Hz  
 SCANS 8  
 ACQTM 2.2295 sec  
 PD 6.0000 sec  
 PW1 5.17 usec  
 IRNUC 1H  
 CTEMP 20.5 c  
 SLVNT CDCL3  
 EXREF 7.26 ppm  
 BF 0.12 Hz  
 RGAIN 36

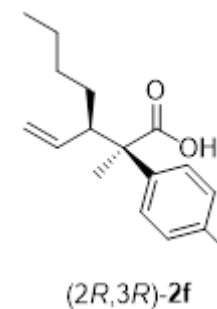

C:\Users\alice\Desktop\ChenTM NMR\2f\_carbon.als

DFILE 2f\_carbon.als  
 COMNT  
 DATIM 27-11-2019 15:58:38  
 OBNUC 13C  
 EXMOD carbon.jpg  
 OBFRQ 98.52 MHz  
 OBSET 4.64 KHz  
 OBFIN 8.74 Hz  
 POINT 26214  
 FREQU 24630.54 Hz  
 SCANS 157  
 ACQTM 1.0643 sec  
 PD 2.0000 sec  
 PW1 3.12 usec  
 IRNUC 1H  
 CTEMP 20.5 c  
 SLVNT CDCL3  
 EXREF 77.00 ppm  
 BF 0.12 Hz  
 RGAIN 60

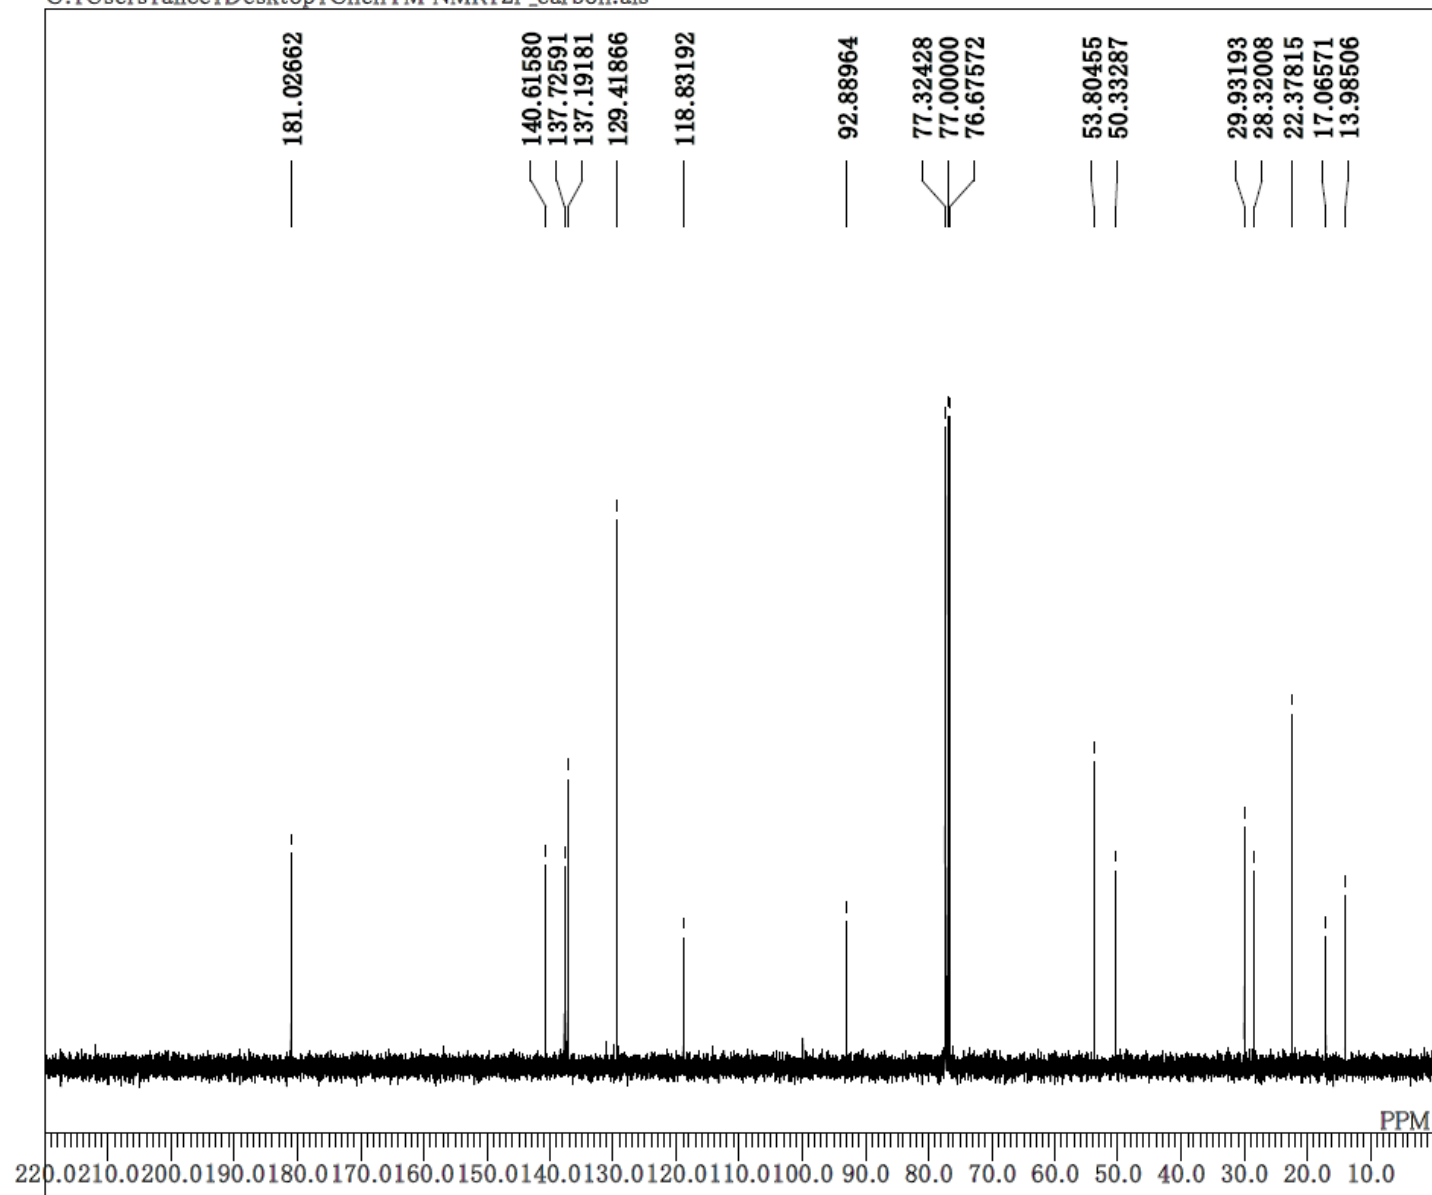

C:\Users\alice\Desktop\ChenTM NMR\2g\_proton.als

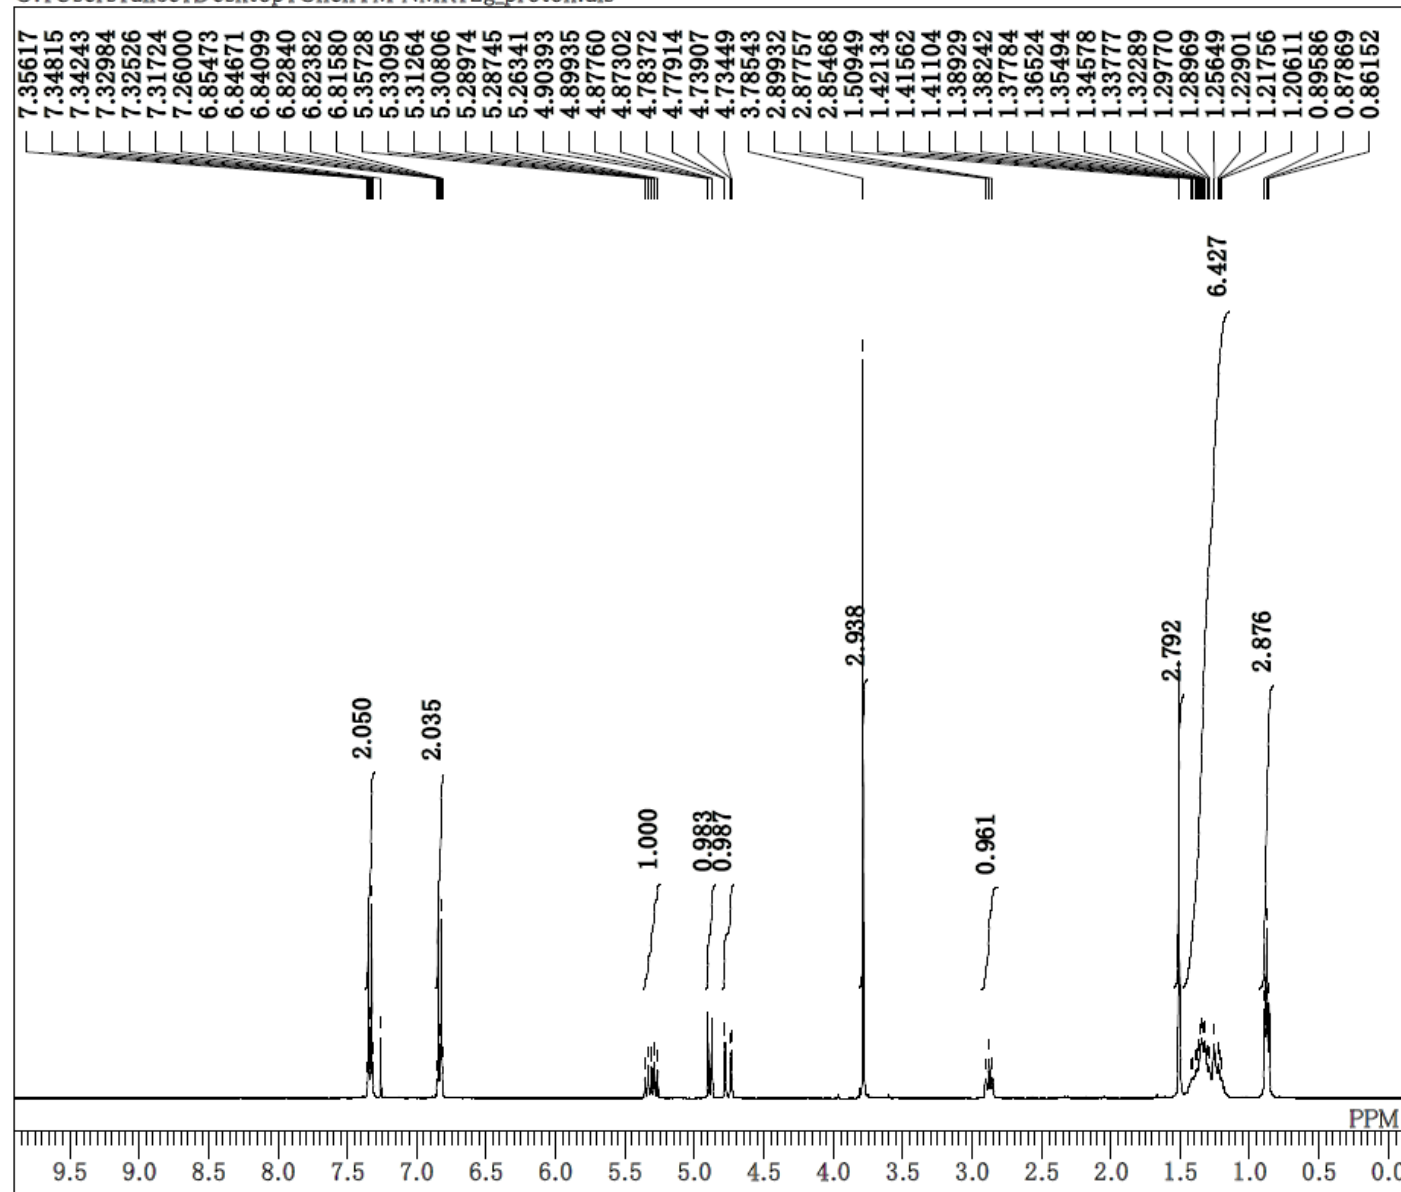

DFILE 2g\_proton.als  
 COMNT  
 DATIM 07-03-2020 21:36:40  
 OBNUC <sup>1</sup>H  
 EXMOD proton.jxp  
 OBFRQ 391.78 MHz  
 OBSET 8.51 KHz  
 OBFIN 3.34 Hz  
 POINT 13107  
 FREQU 5878.90 Hz  
 SCANS 8  
 ACQTM 2.2295 sec  
 PD 6.0000 sec  
 PW1 5.17 usec  
 IRNUC <sup>1</sup>H  
 CTEMP 20.3 c  
 SLVNT CDCL<sub>3</sub>  
 EXREF 7.26 ppm  
 BF 0.12 Hz  
 RGAIN 34

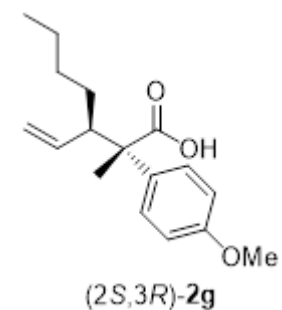

C:\Users\alice\Desktop\ChenTM NMR\2g\_carbon.als

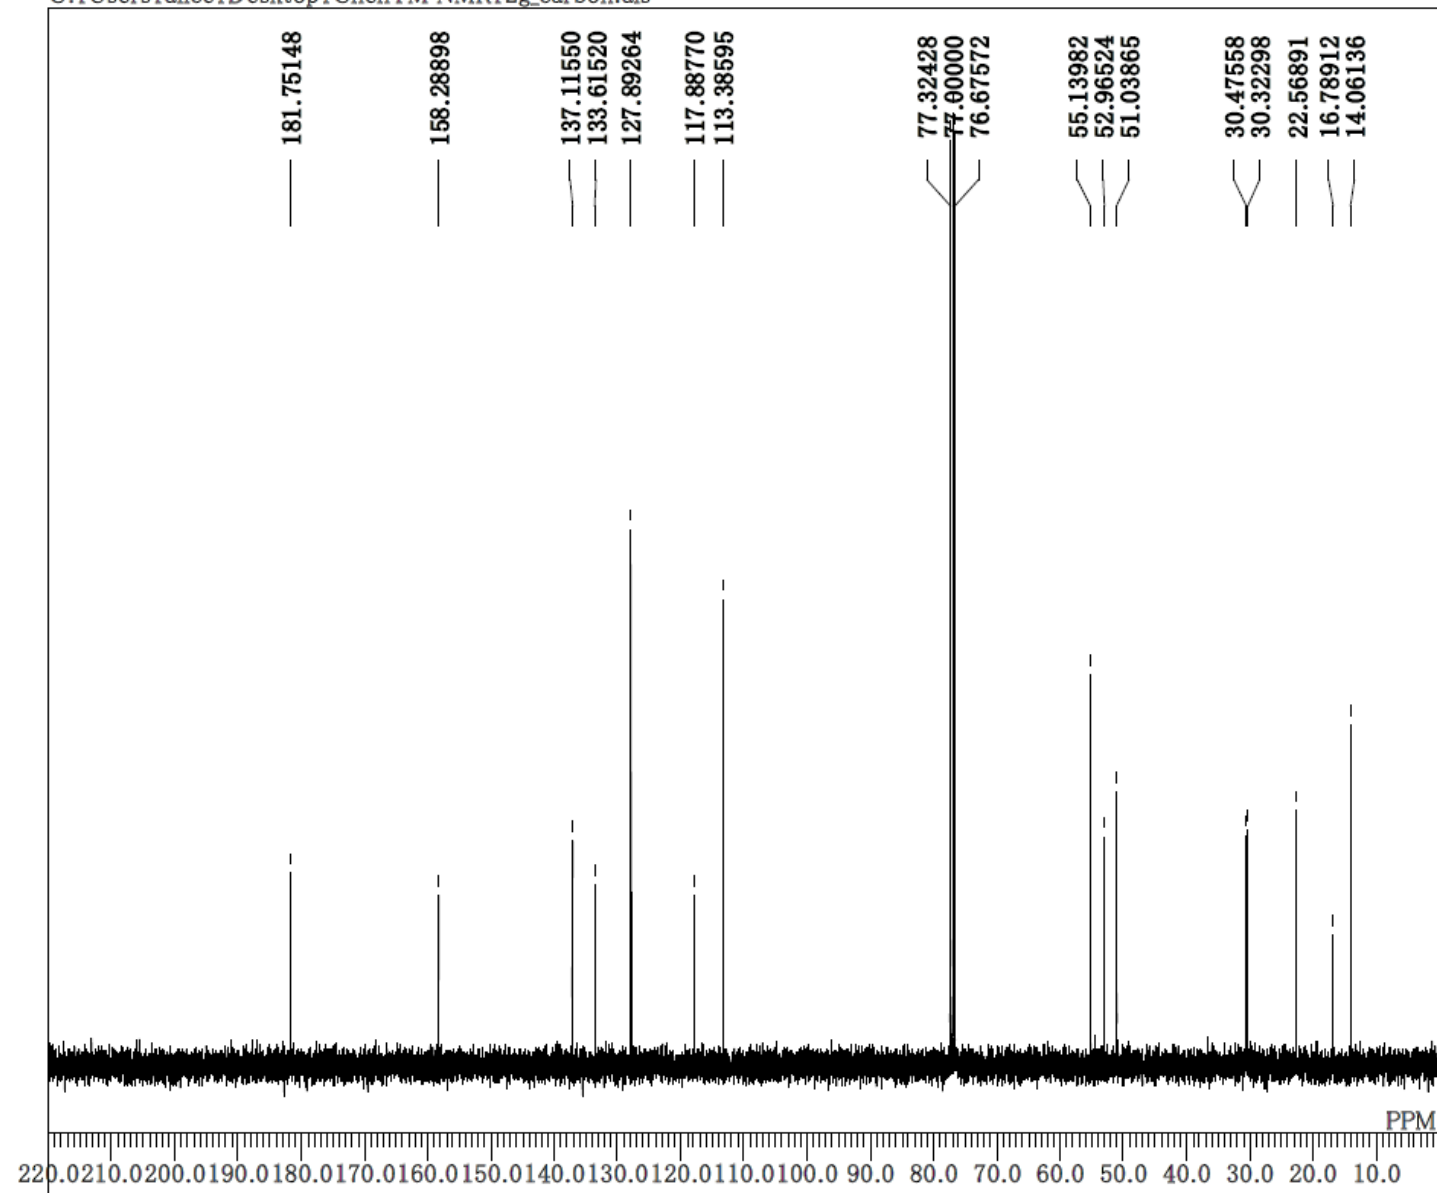

DFILE 2g\_carbon.als  
 COMNT  
 DATIM 07-03-2020 21:51:16  
 OBNUC 13C  
 EXMOD carbon.jpg  
 OBFRQ 98.52 MHz  
 OBSET 4.64 KHz  
 OBFIN 8.74 Hz  
 POINT 26214  
 FREQU 24630.54 Hz  
 SCANS 162  
 ACQTM 1.0643 sec  
 PD 2.0000 sec  
 PW1 3.12 usec  
 IRNUC 1H  
 CTEMP 20.3 c  
 SLVNT CDCL3  
 EXREF 77.00 ppm  
 BF 0.12 Hz  
 RGAIN 60

C:\Users\alice\Desktop\ChenTM NMR\2g'\_proton.als

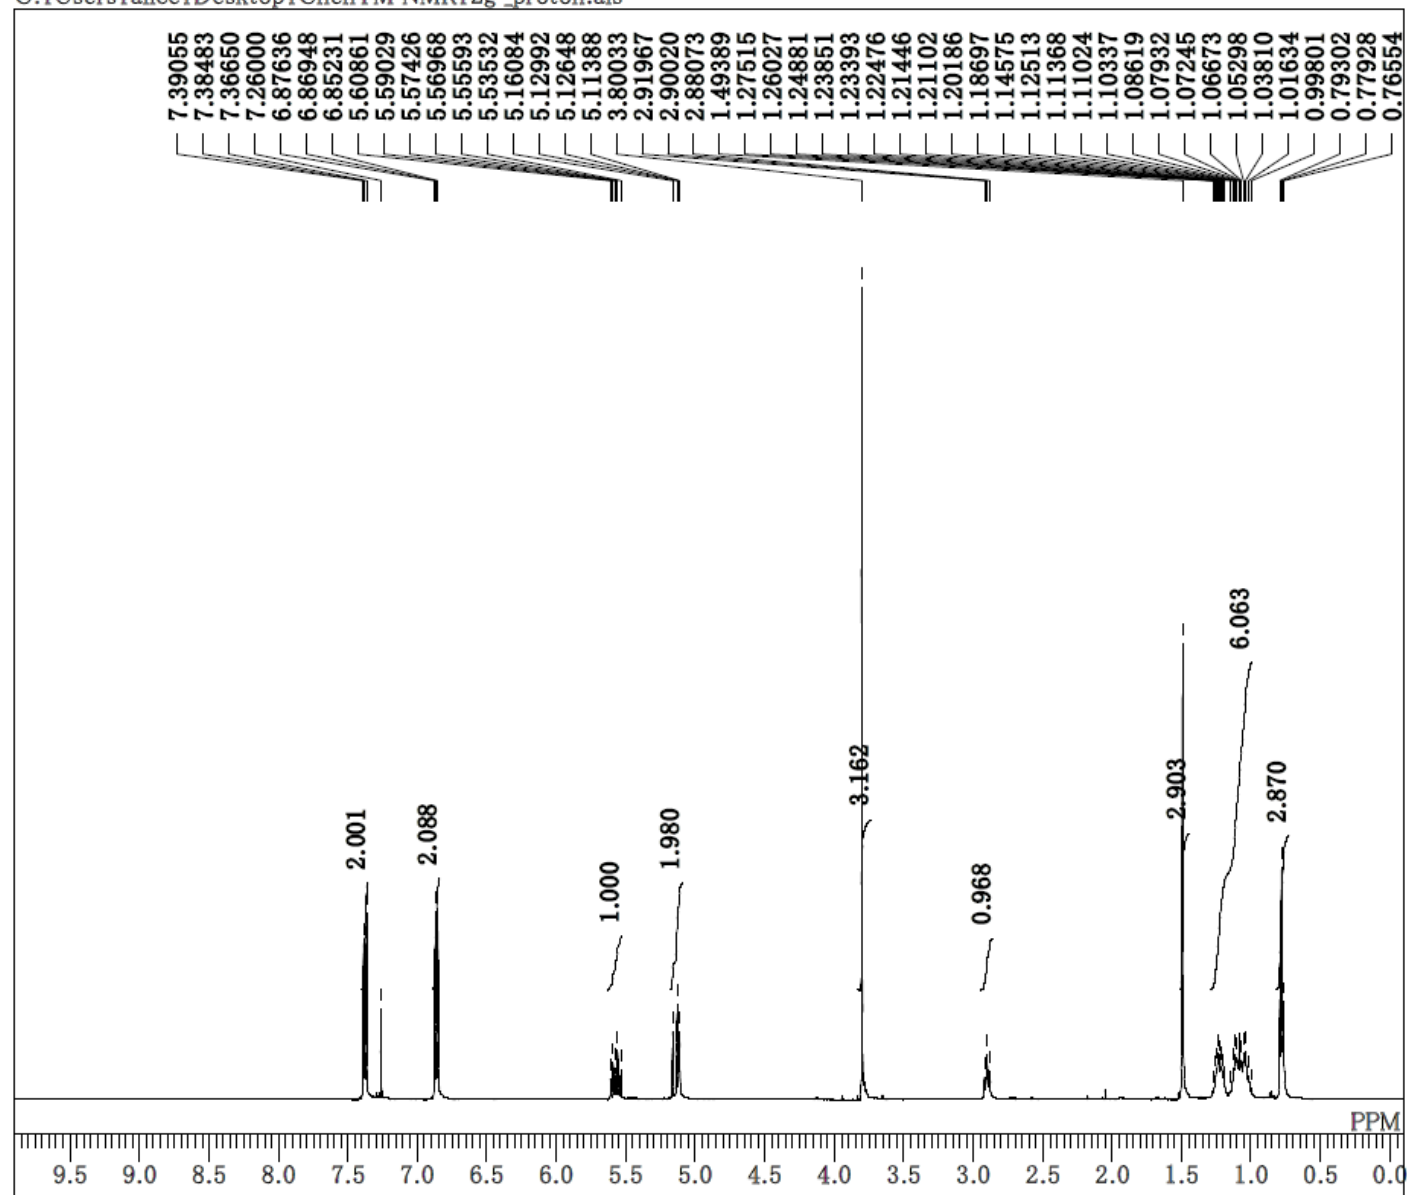

DFILE  
COMNT  
DATIM  
OBNUC  
EXMOD  
OBFRQ  
OBSET  
OBFIN  
POINT  
FREQU  
SCANS  
ACQTM  
PD  
PW1  
IRNUC  
CTEMP  
SLVNT  
EXREF  
BF  
RGAIN

2g'\_proton.als  
2019-10-04 15:57:51  
1H  
proton.jxp  
500.16 MHz  
2.41 KHz  
6.01 Hz  
13107  
7507.51 Hz  
8  
1.7459 sec  
6.0000 sec  
5.55 usec  
1H  
22.0 c  
CDCL3  
7.26 ppm  
0.12 Hz  
40

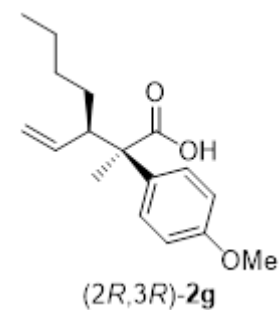

C:\Users\alice\Desktop\ChenTM NMR\2g'\_carbon.als

DFILE 2g'\_carbon.als  
 COMNT  
 DATIM 04-10-2019 19:20:04  
 OBNUC 13C  
 EXMOD carbon.jpg  
 OBFRQ 98.52 MHz  
 OBSET 4.64 KHz  
 OBFIN 8.74 Hz  
 POINT 26214  
 FREQU 24630.54 Hz  
 SCANS 109  
 ACQTM 1.0643 sec  
 PD 2.0000 sec  
 PW1 3.12 usec  
 IRNUC 1H  
 CTEMP 21.1 c  
 SLVNT CDCL3  
 EXREF 77.00 ppm  
 BF 0.12 Hz  
 RGAIN 60

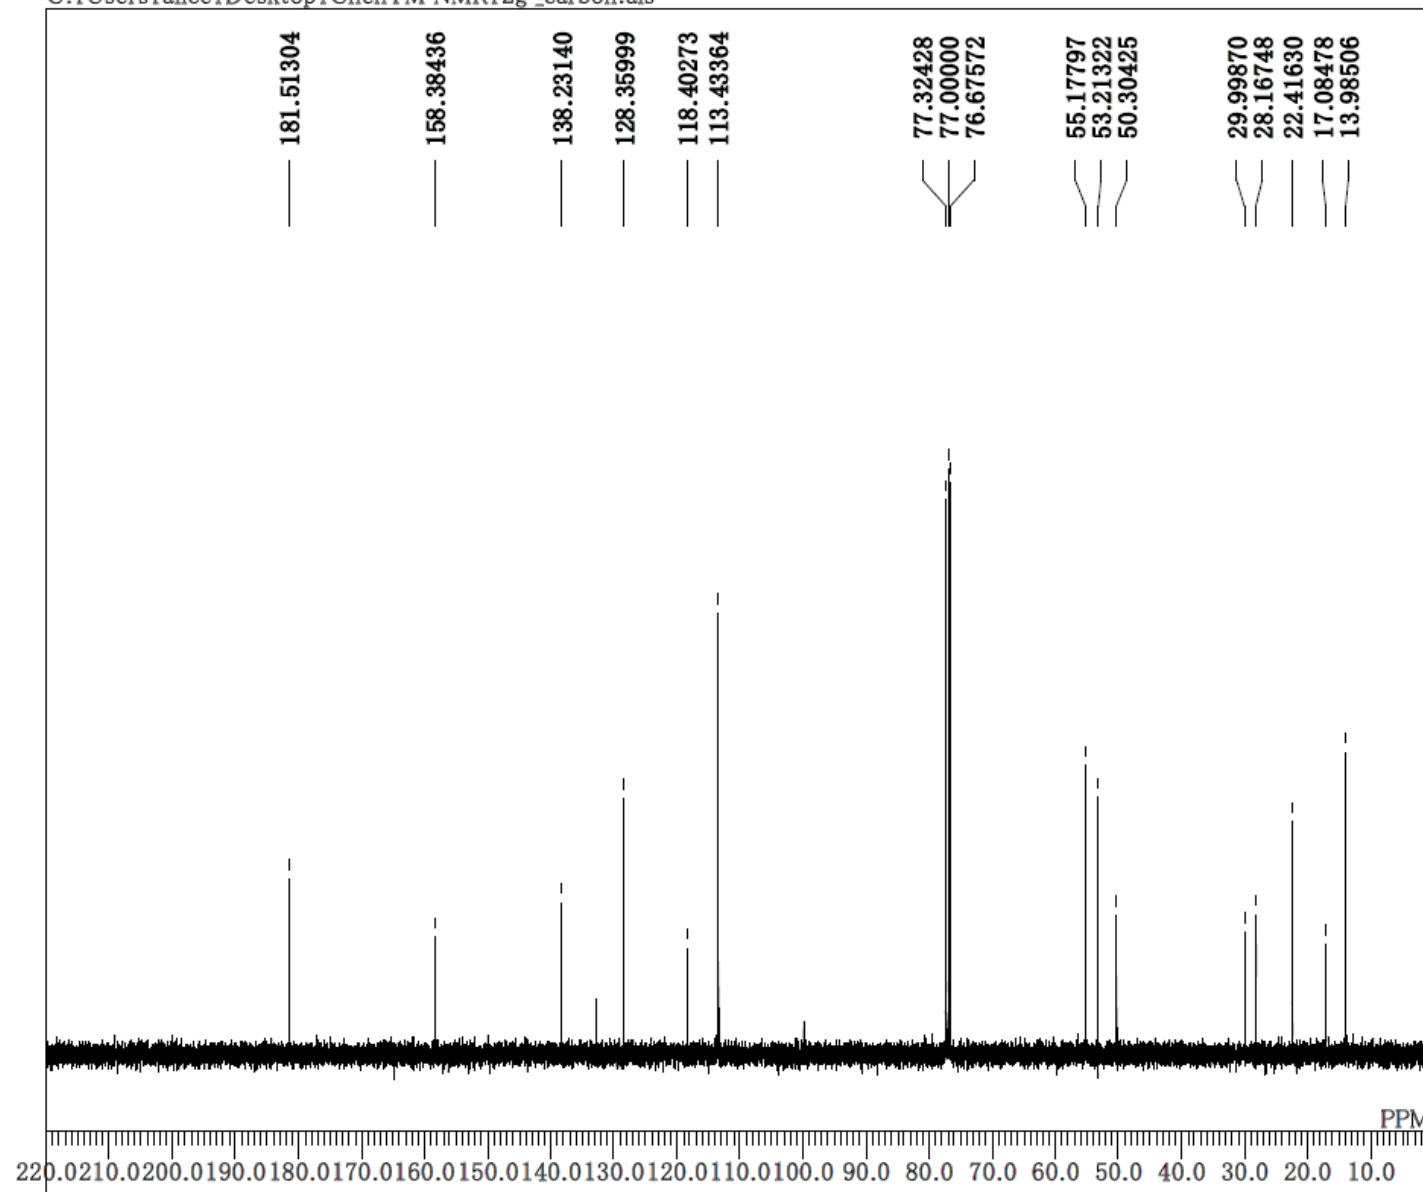



C:\Users\Valice\Desktop\ChenTM NMR\2h\_proton.als

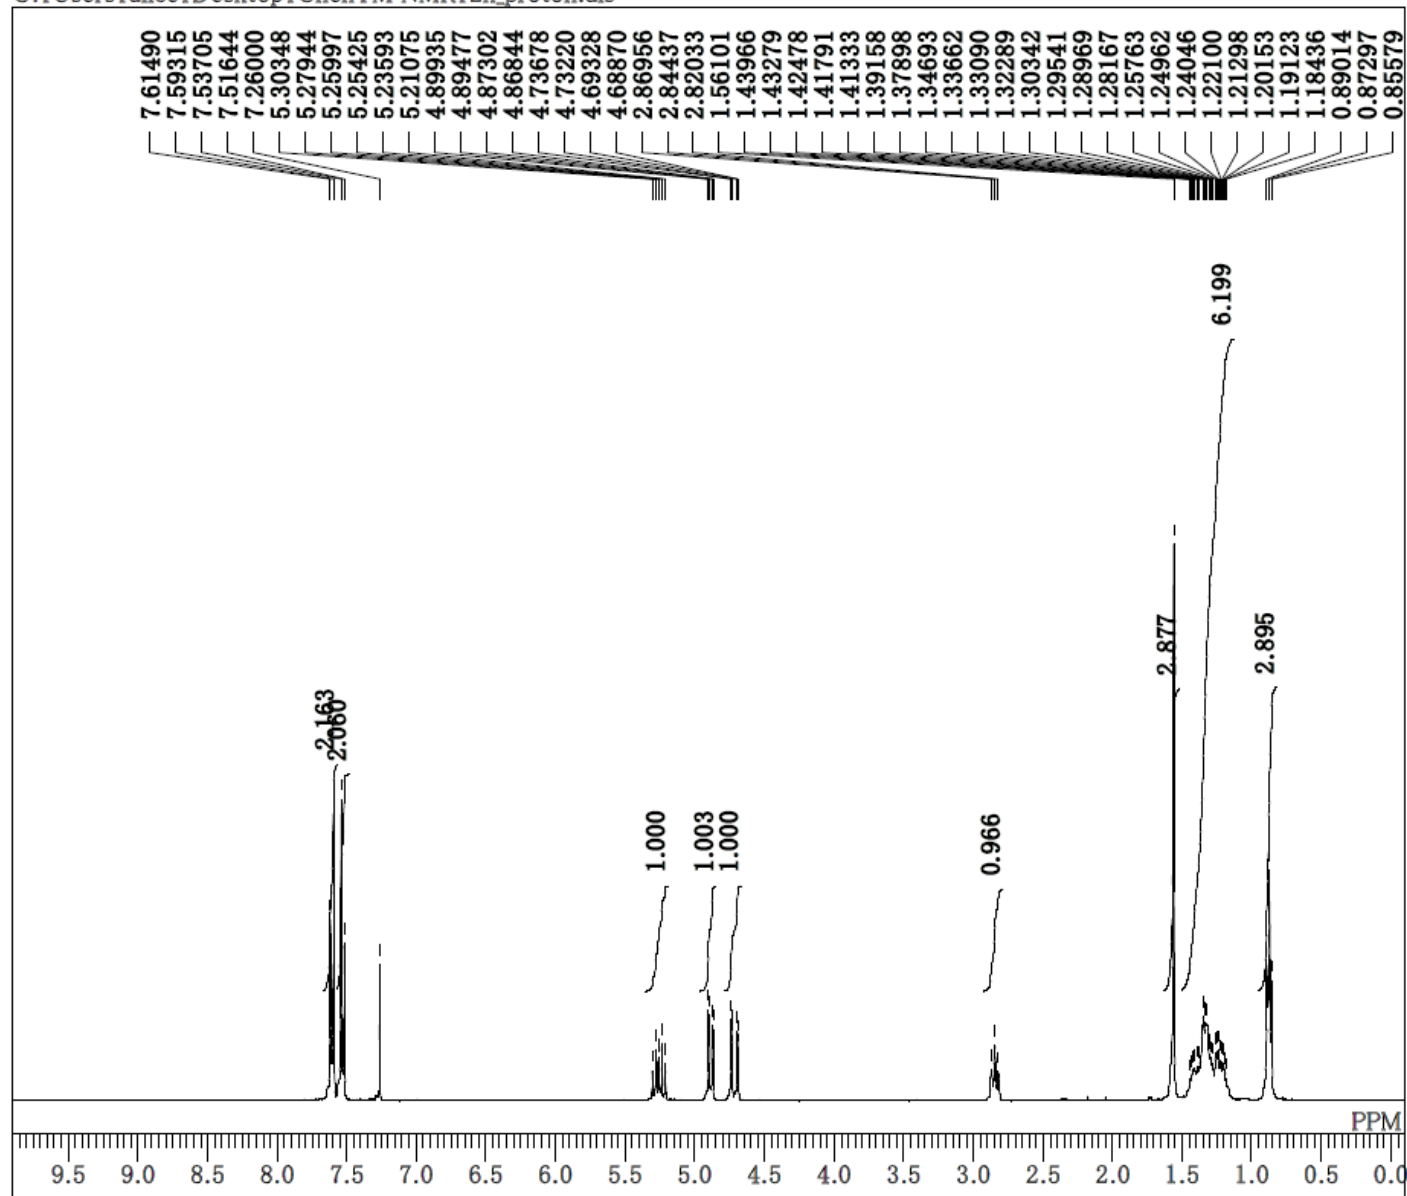

DFILE 2h\_proton.als  
 COMNT  
 DATIM 09-11-2019 11:41:53  
 OBNUC 1H  
 EXMOD proton.jxp  
 OBFRQ 391.78 MHz  
 OBSET 8.51 KHz  
 OBFIN 3.34 Hz  
 POINT 13107  
 FREQU 5878.90 Hz  
 SCANS 8  
 ACQTM 2.2295 sec  
 PD 6.0000 sec  
 PW1 5.17 usec  
 IRNUC 1H  
 CTEMP 20.4 c  
 SLVNT CDCL3  
 EXREF 7.26 ppm  
 BF 0.12 Hz  
 RGAIN 38

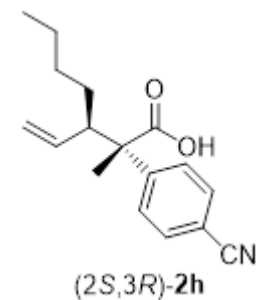

C:\Users\alice\Desktop\ChenTM NMR\2h\_carbon.als

DFILE 2h\_carbon.als  
 COMNT  
 DATIM 09-11-2019 11:55:20  
 OBNUC 13C  
 EXMOD carbon.jpg  
 OBFRQ 98.52 MHz  
 OBSET 4.64 KHz  
 OBFIN 8.74 Hz  
 POINT 26214  
 FREQU 24630.54 Hz  
 SCANS 137  
 ACQTM 1.0643 sec  
 PD 2.0000 sec  
 PW1 3.12 usec  
 IRNUC 1H  
 CTEMP 20.6 c  
 SLVNT CDCL3  
 EXREF 77.00 ppm  
 BF 0.12 Hz  
 RGAIN 60

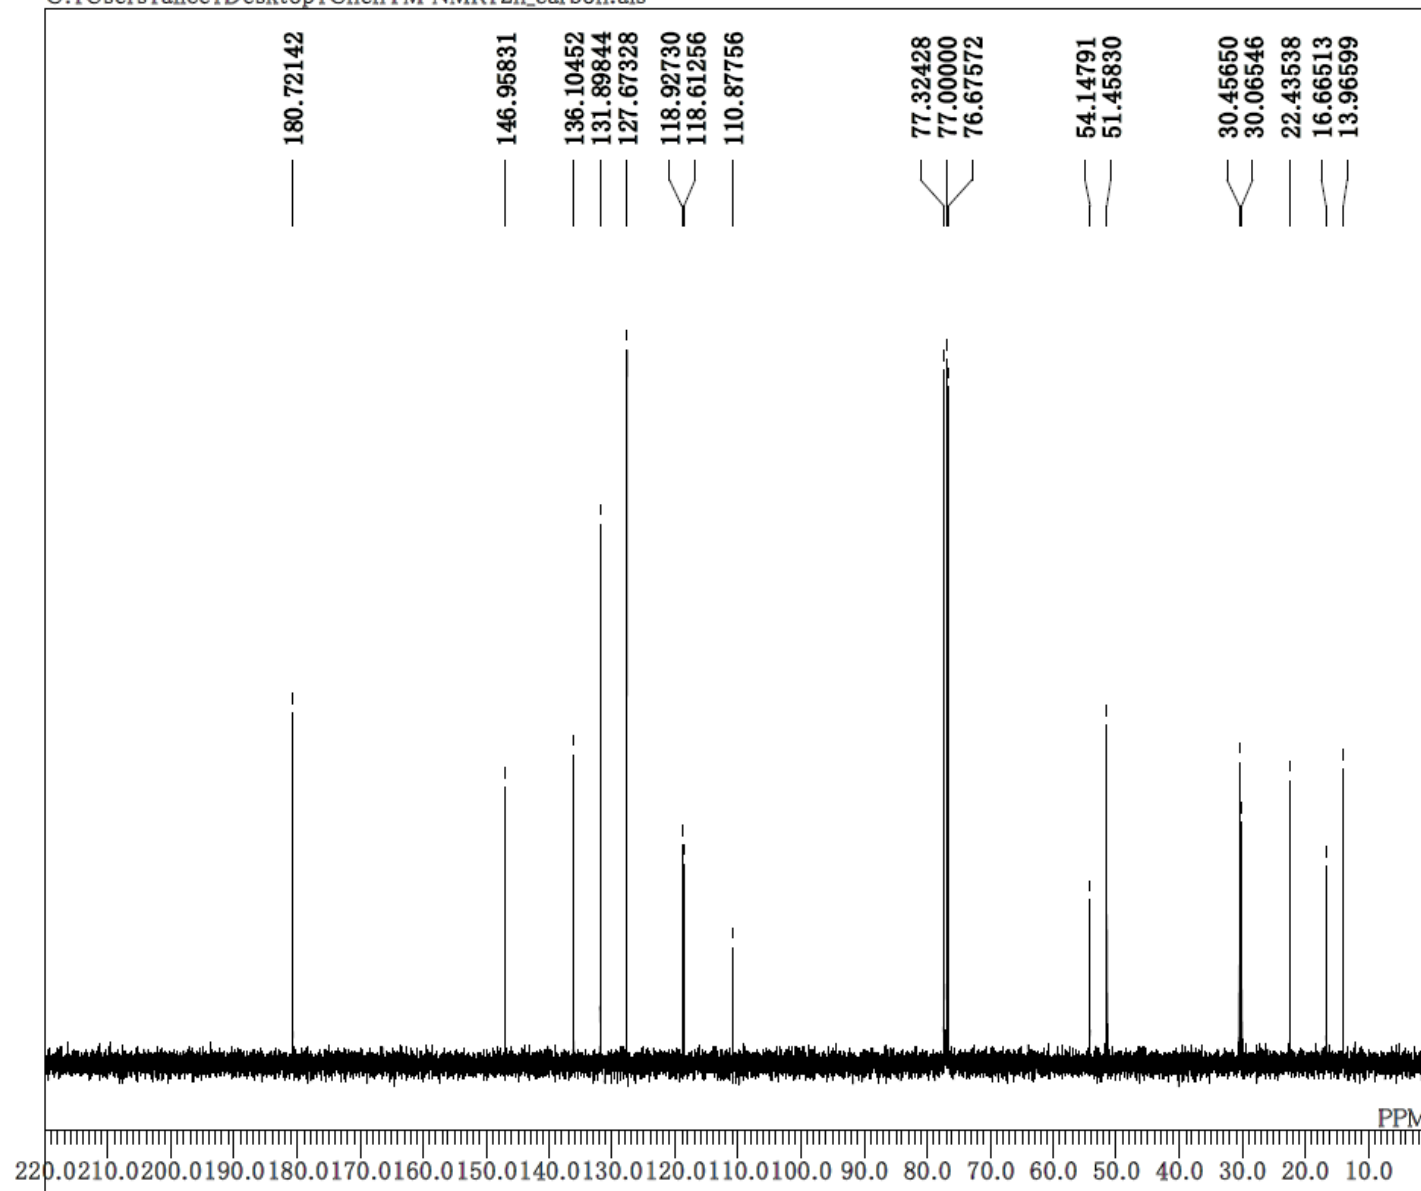

C:\Users\Valice\Desktop\ChenTM NMR\2h'\_proton.als

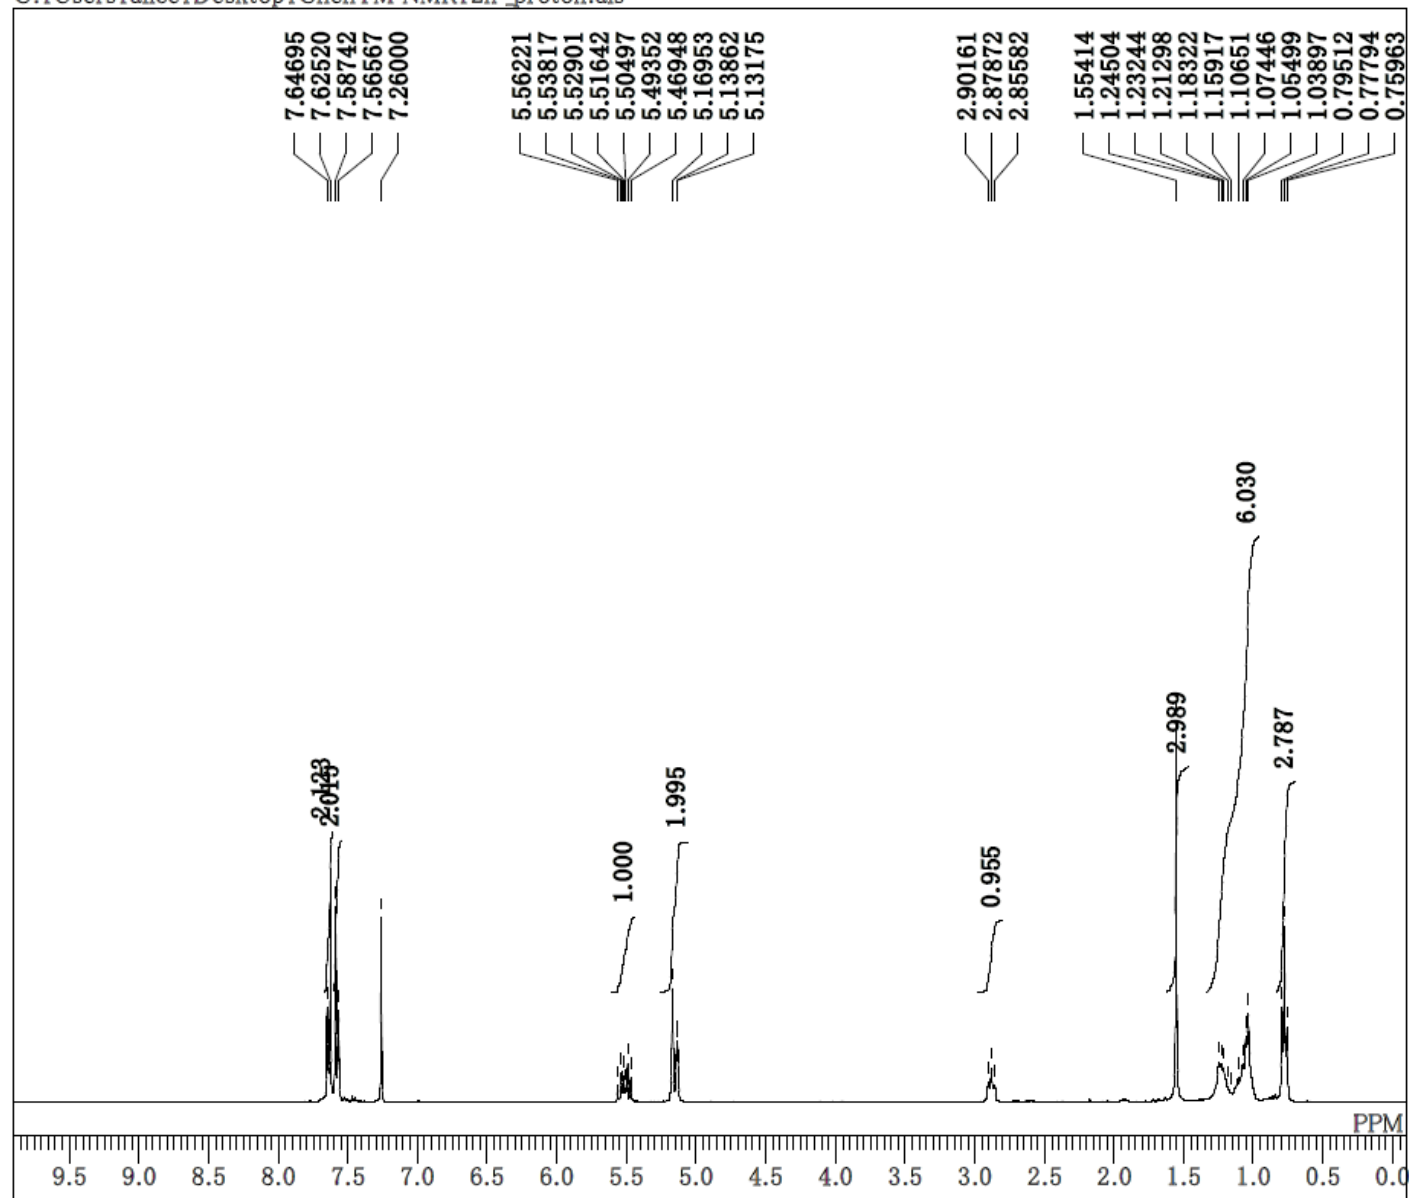

DFILE 2h'\_proton.als  
 COMNT  
 DATIM 12-11-2019 20:39:46  
 OBNUC 1H  
 EXMOD proton.jxp  
 OBFRQ 391.78 MHz  
 OBSET 8.51 KHz  
 OBFIN 3.34 Hz  
 POINT 13107  
 FREQU 5878.90 Hz  
 SCANS 8  
 ACQTM 2.2295 sec  
 PD 6.0000 sec  
 PW1 5.17 usec  
 IRNUC 1H  
 CTEMP 20.7 c  
 SLVNT CDCL3  
 EXREF 7.26 ppm  
 BF 1.20 Hz  
 RGAIN 44

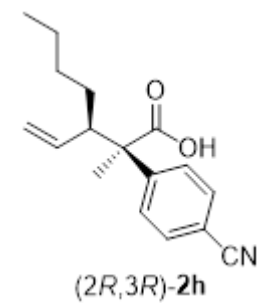

C:\Users\Valice\Desktop\ChenTM NMR\2h'\_carbon.als

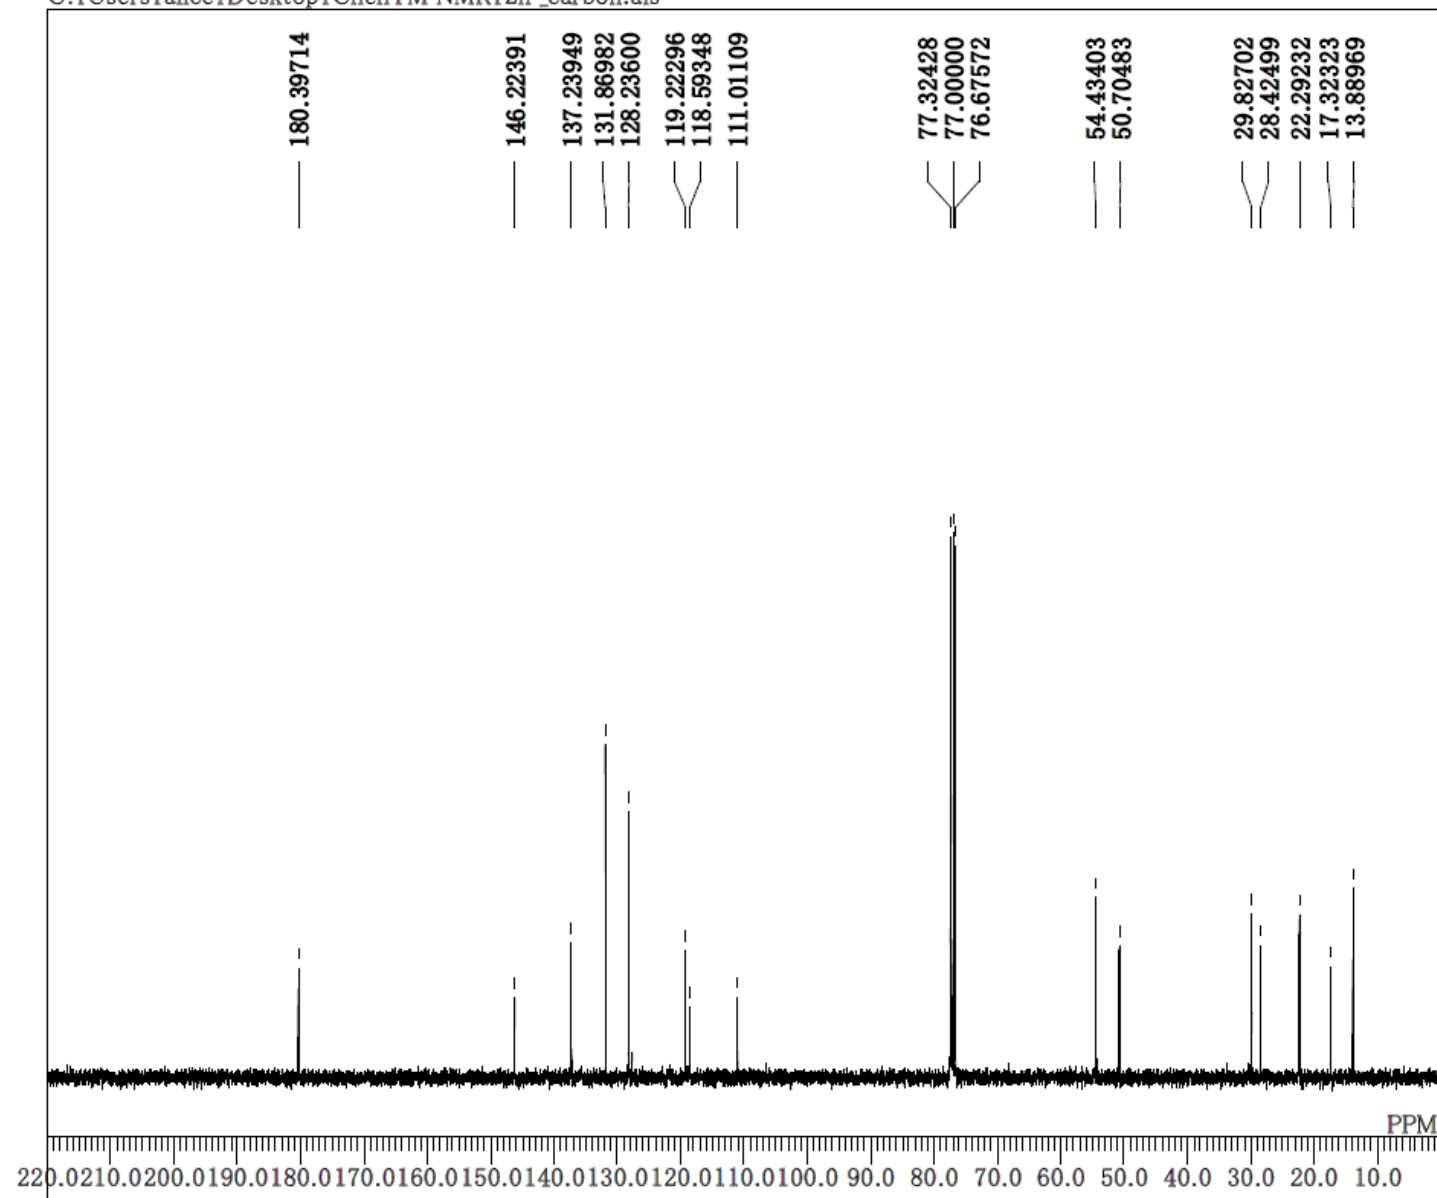

DFILE 2h'\_carbon.als  
 COMNT  
 DATIM 12-11-2019 22:02:39  
 OBNUC 13C  
 EXMOD carbon.jpg  
 OBFRQ 98.52 MHz  
 OBSET 4.64 KHz  
 OBFIN 8.74 Hz  
 POINT 26214  
 FREQU 24630.54 Hz  
 SCANS 104  
 ACQTM 1.0643 sec  
 PD 2.0000 sec  
 PW1 3.12 usec  
 IRNUC 1H  
 CTEMP 21.0 c  
 SLVNT CDCL3  
 EXREF 77.00 ppm  
 BF 1.20 Hz  
 RGAIN 60

|       |                     |
|-------|---------------------|
| DFILE | 2i_proton.als       |
| COMNT |                     |
| DATIM | 16-10-2019 14:19:30 |
| OBNUC | 1H                  |
| EXMOD | proton.jxp          |
| OBFRQ | 391.78 MHz          |
| OBSET | 8.51 KHz            |
| OBFIN | 3.34 Hz             |
| POINT | 13107               |
| FREQU | 5878.90 Hz          |
| SCANS | 8                   |
| ACQTM | 2.2295 sec          |
| PD    | 6.0000 sec          |
| PW1   | 5.17 usec           |
| IRNUC | 1H                  |
| CTEMP | 20.9 c              |
| SLVNT | CDCL3               |
| EXREF | 7.26 ppm            |
| BF    | 0.12 Hz             |
| RGAIN | 32                  |

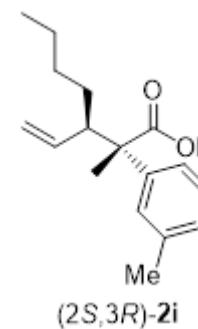

C:\Users\valice\Desktop\ChenTM NMR\2i\_carbon.als

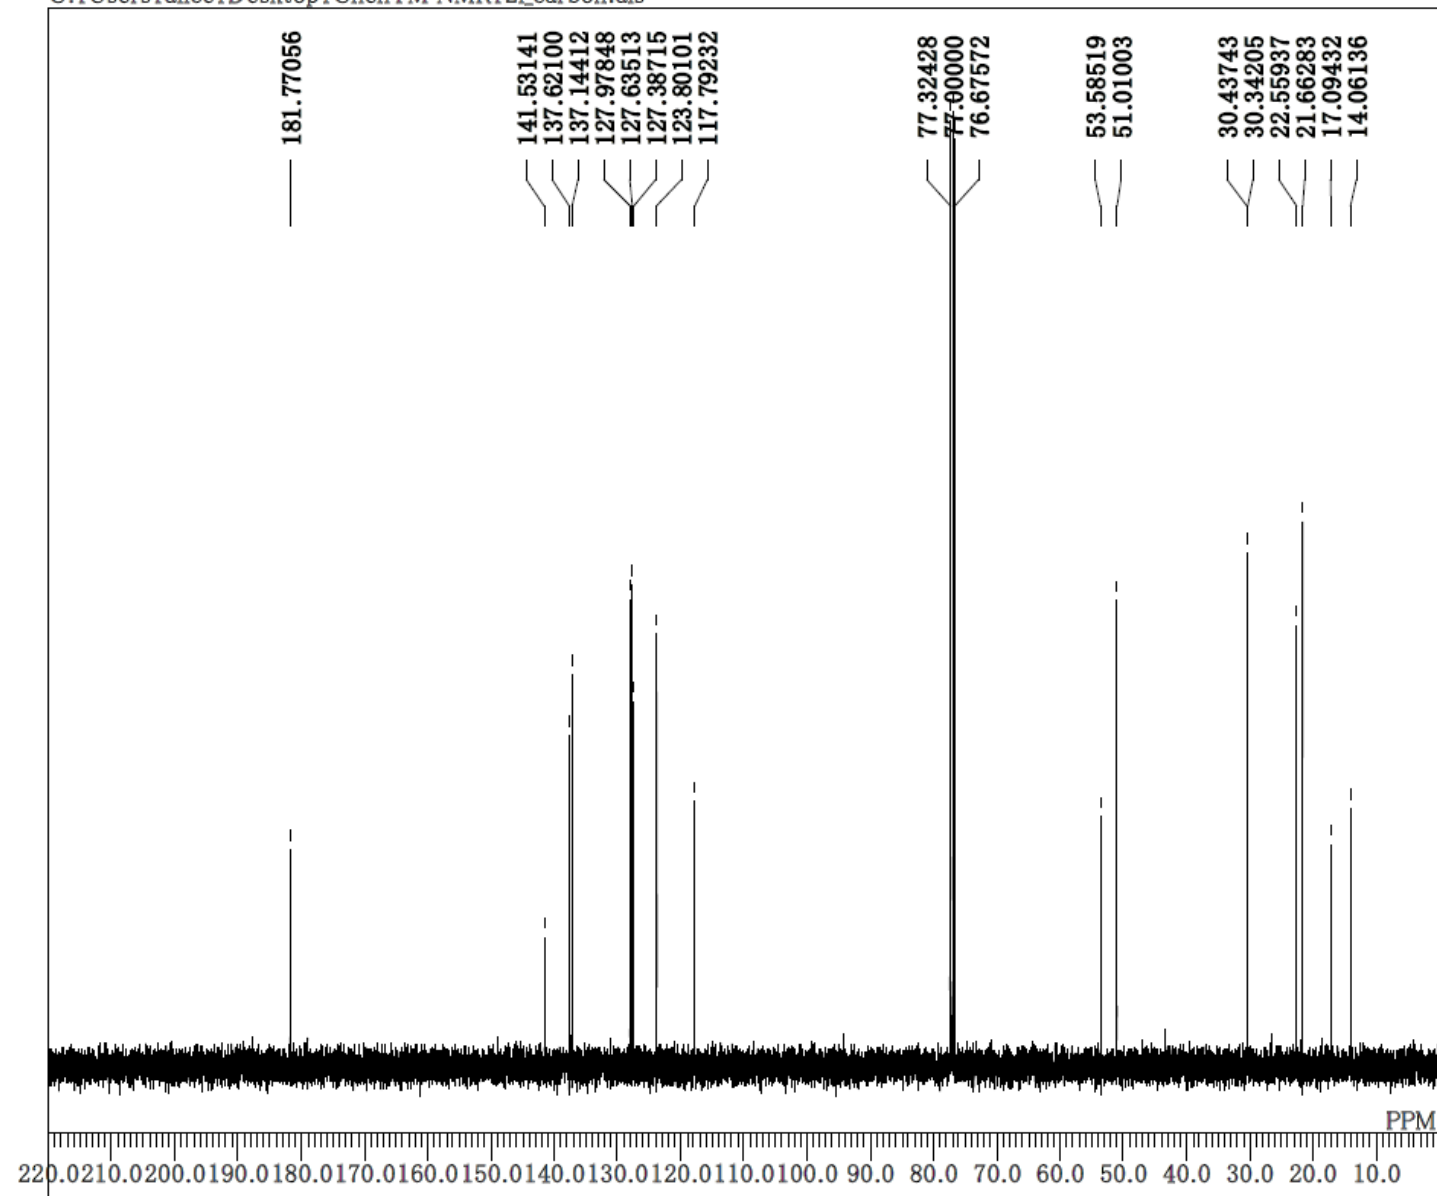

|       |                     |
|-------|---------------------|
| DFILE | 2i_carbon.als       |
| COMNT |                     |
| DATIM | 16-10-2019 14:43:37 |
| OBNUC | 13C                 |
| EXMOD | carbon.jpg          |
| OBFRQ | 98.52 MHz           |
| OBSET | 4.64 KHz            |
| OBFIN | 8.74 Hz             |
| POINT | 26214               |
| FREQU | 24630.54 Hz         |
| SCANS | 106                 |
| ACQTM | 1.0643 sec          |
| PD    | 2.0000 sec          |
| PW1   | 3.12 usec           |
| IRNUC | 1H                  |
| CTEMP | 21.0 c              |
| SLVNT | CDCL3               |
| EXREF | 77.00 ppm           |
| BF    | 0.12 Hz             |
| RGAIN | 60                  |

C:\Users\valice\Desktop\ChenTM NMR\2i'\_proton.als

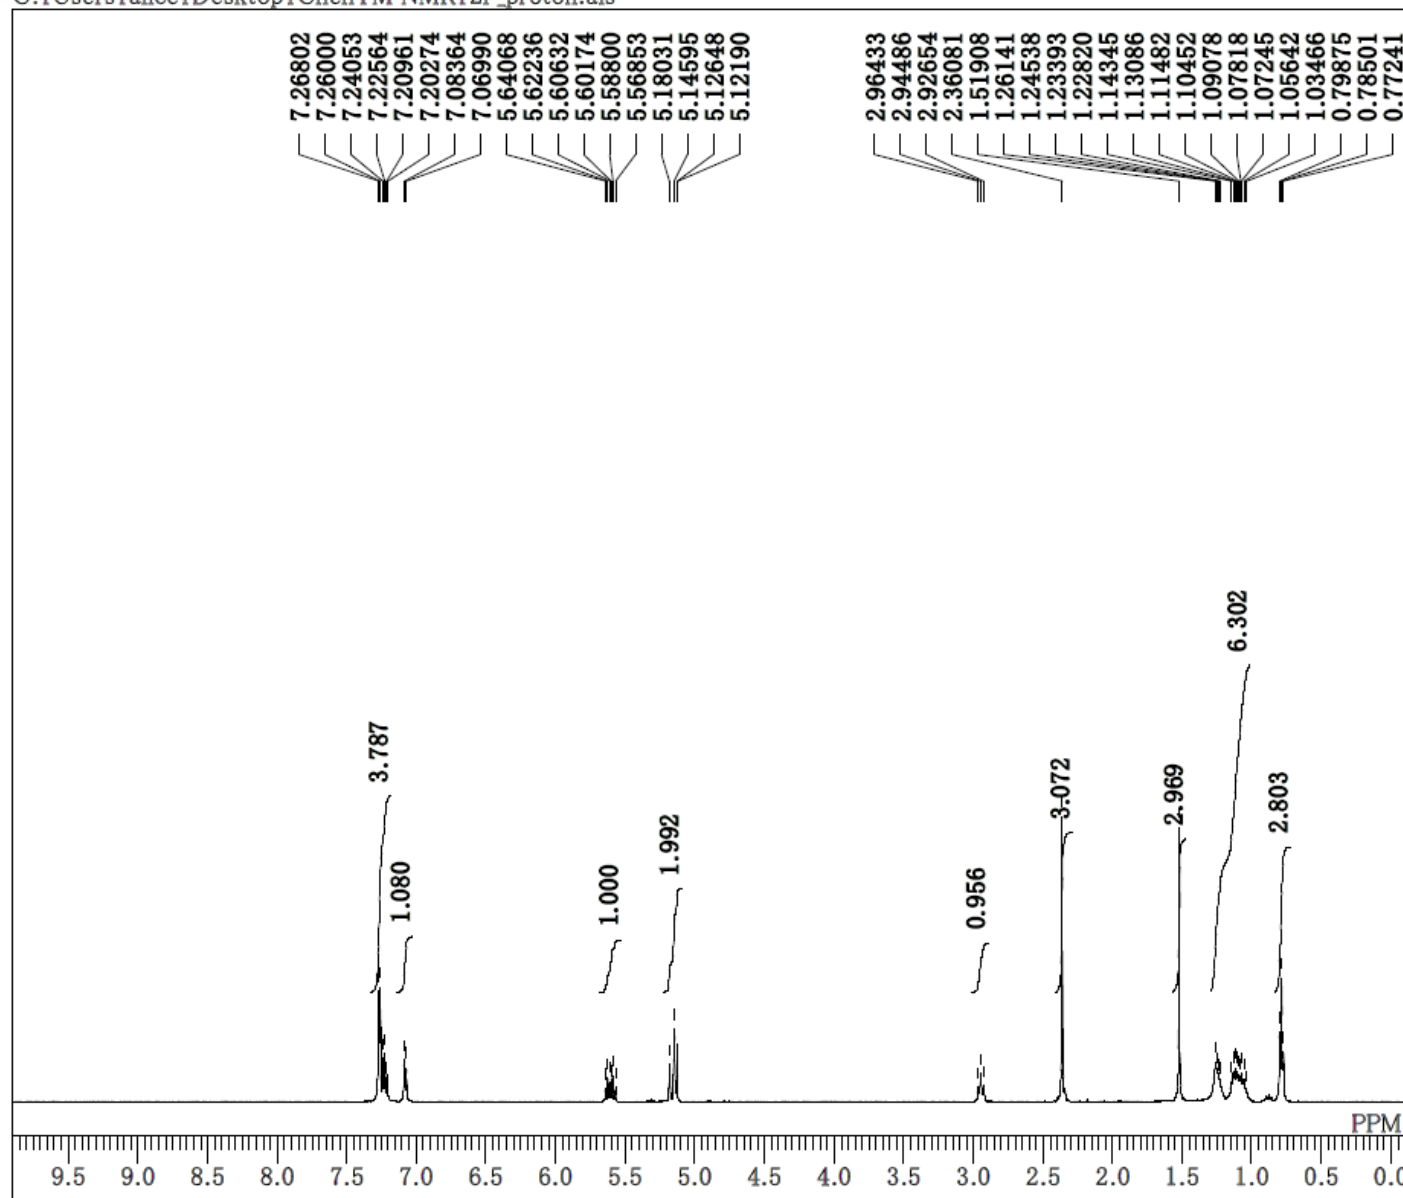

2i'\_proton.als

|       |                     |
|-------|---------------------|
| DFILE | 2i'_proton.als      |
| COMNT |                     |
| DATIM | 2019-11-06 12:16:28 |
| OBNUC | <sup>1</sup> H      |
| EXMOD | proton.jxp          |
| OBFRQ | 500.16 MHz          |
| OBSET | 2.41 KHz            |
| OBFIN | 6.01 Hz             |
| POINT | 13107               |
| FREQU | 7507.51 Hz          |
| SCANS | 8                   |
| ACQTM | 1.7459 sec          |
| PD    | 6.0000 sec          |
| PW1   | 5.55 usec           |
| IRNUC | <sup>1</sup> H      |
| CTEMP | 21.7 c              |
| SLVNT | CDCL <sub>3</sub>   |
| EXREF | 7.26 ppm            |
| BF    | 0.10 Hz             |
| RGAIN | 42                  |

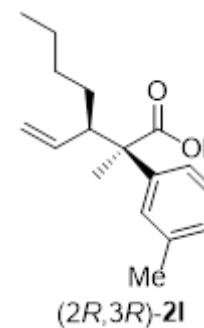

C:\Users\Valice\Desktop\ChenTM NMR\2i'\_carbon.als

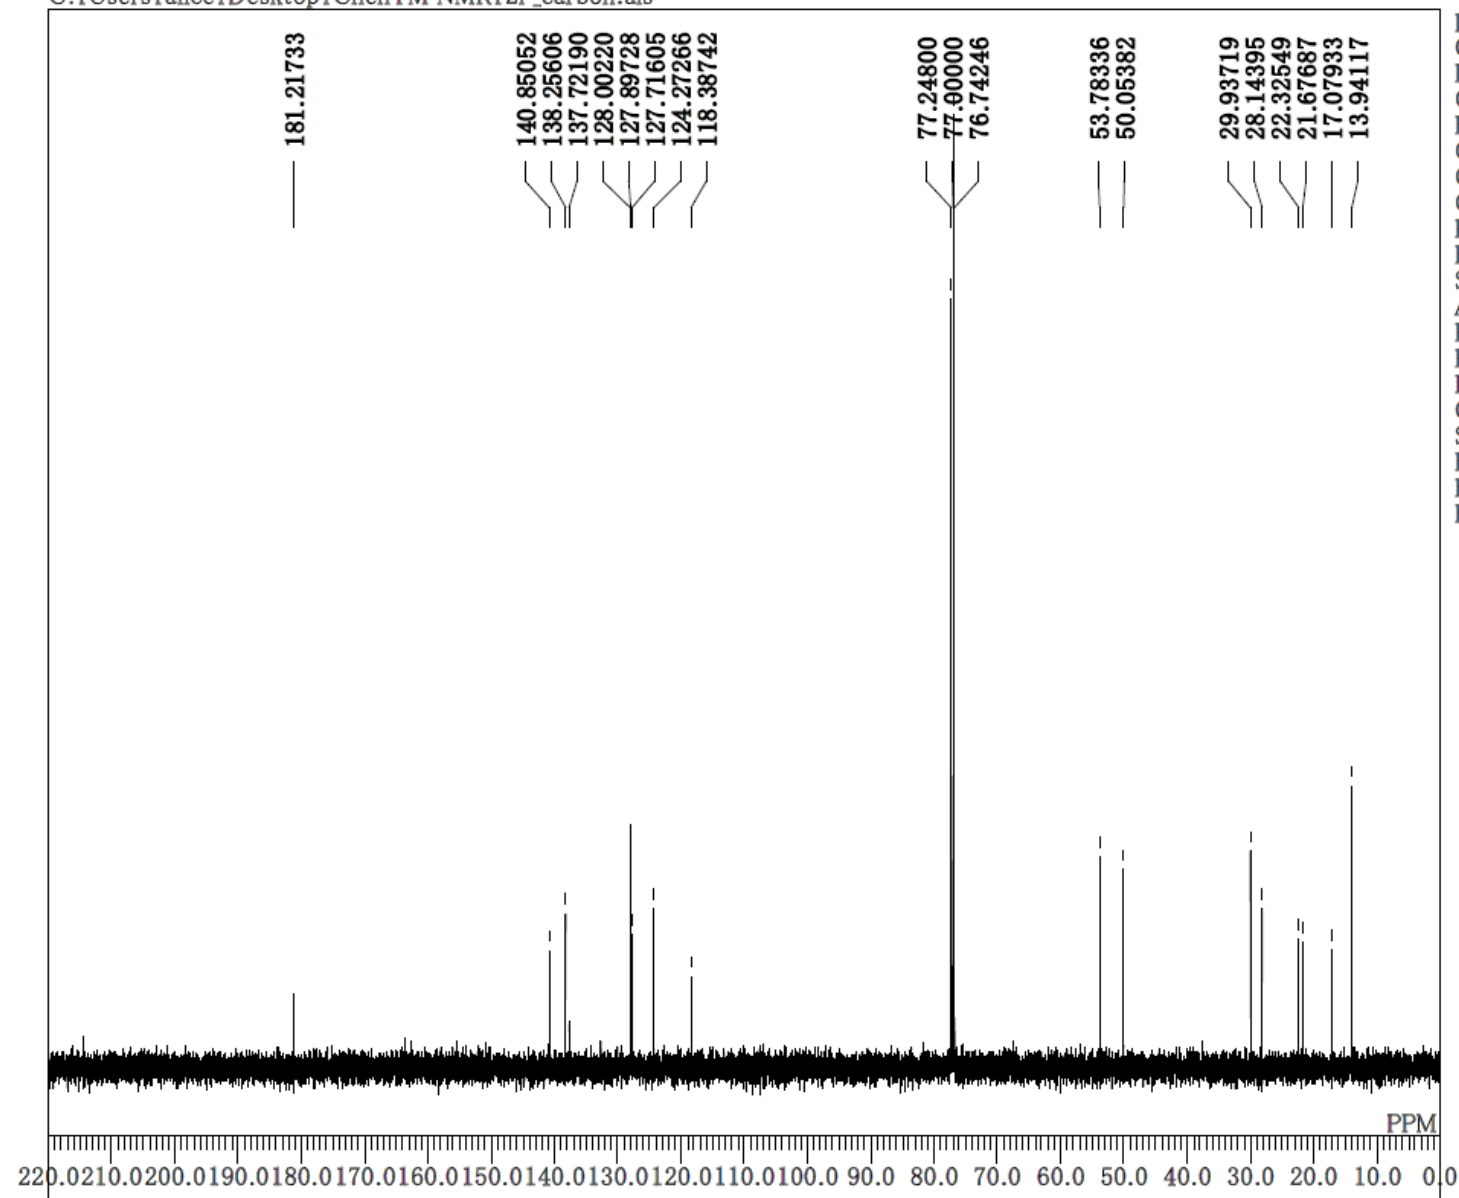

DFILE 2i'\_carbon.als  
 COMNT  
 DATIM 2019-11-06 12:37:28  
 OBNUC 13C  
 EXMOD carbon.jxp  
 OBFRQ 125.77 MHz  
 OBSET 7.87 KHz  
 OBFIN 4.21 Hz  
 POINT 26214  
 FREQU 31446.54 Hz  
 SCANS 102  
 ACQTM 0.8336 sec  
 PD 2.0000 sec  
 PW1 3.40 usec  
 IRNUC 1H  
 CTEMP 22.0 c  
 SLVNT CDCL3  
 EXREF 77.00 ppm  
 BF 0.10 Hz  
 RGAIN 60



C:\Users\alice\Desktop\ChenTM NMR\2j\_proton.als

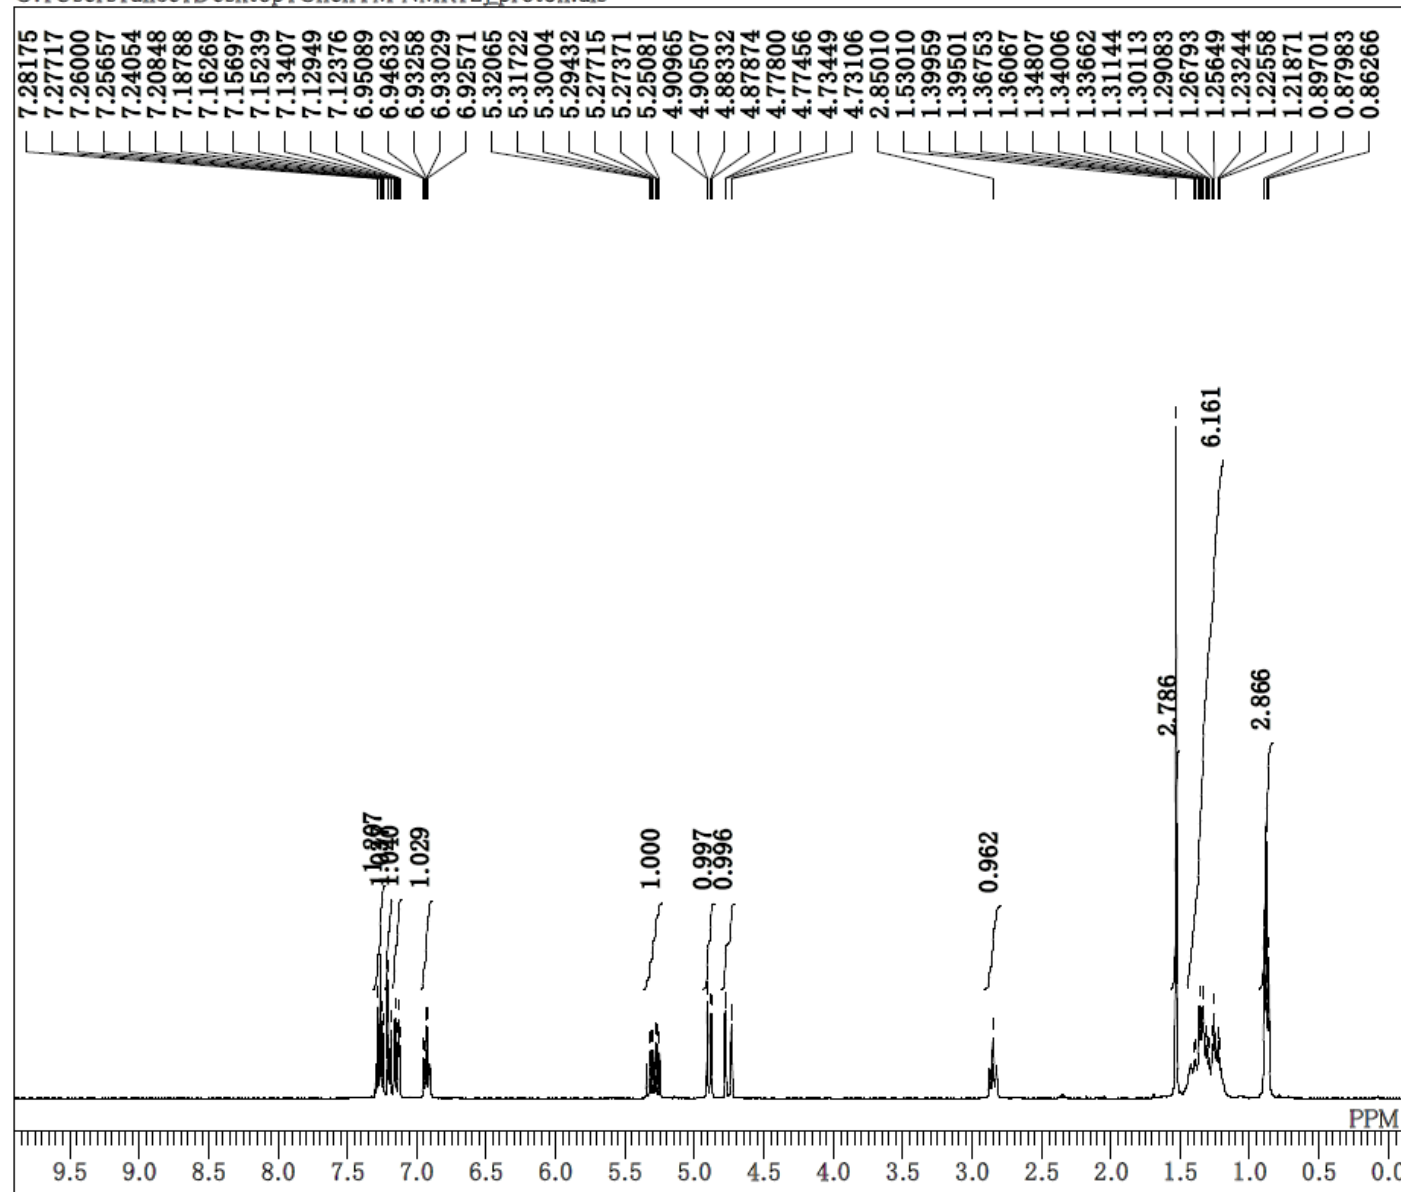

DFILE 2j\_proton.als  
 COMNT  
 DATIM 16-10-2019 14:24:05  
 OBNUC 1H  
 EXMOD proton.jxp  
 OBFRQ 391.78 MHz  
 OBSET 8.51 KHz  
 OBFIN 3.34 Hz  
 POINT 13107  
 FREQU 5878.90 Hz  
 SCANS 8  
 ACQTM 2.2295 sec  
 PD 6.0000 sec  
 PW1 5.17 usec  
 IRNUC 1H  
 CTEMP 20.9 c  
 SLVNT CDCL3  
 EXREF 7.26 ppm  
 BF 0.12 Hz  
 RGAIN 30

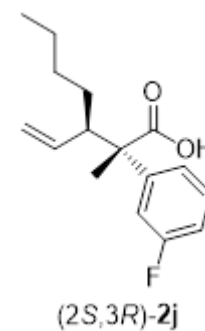

I:\ChenTM NMR\2j\_carbon.als

DFILE 2j\_carbon.als  
 COMNT  
 DATIM 16-10-2019 14:52:10  
 OBNUC <sup>13</sup>C  
 EXMOD carbon.jpg  
 OBFRQ 98.52 MHz  
 OBSET 4.64 KHz  
 OBFIN 8.74 Hz  
 POINT 26214  
 FREQU 24630.54 Hz  
 SCANS 112  
 ACQTM 1.0643 sec  
 PD 2.0000 sec  
 PW1 3.12 usec  
 IRNUC <sup>1</sup>H  
 CTEMP 21.0 c  
 SLVNT CDCL<sub>3</sub>  
 EXREF 77.00 ppm  
 BF 0.12 Hz  
 RGAIN 60

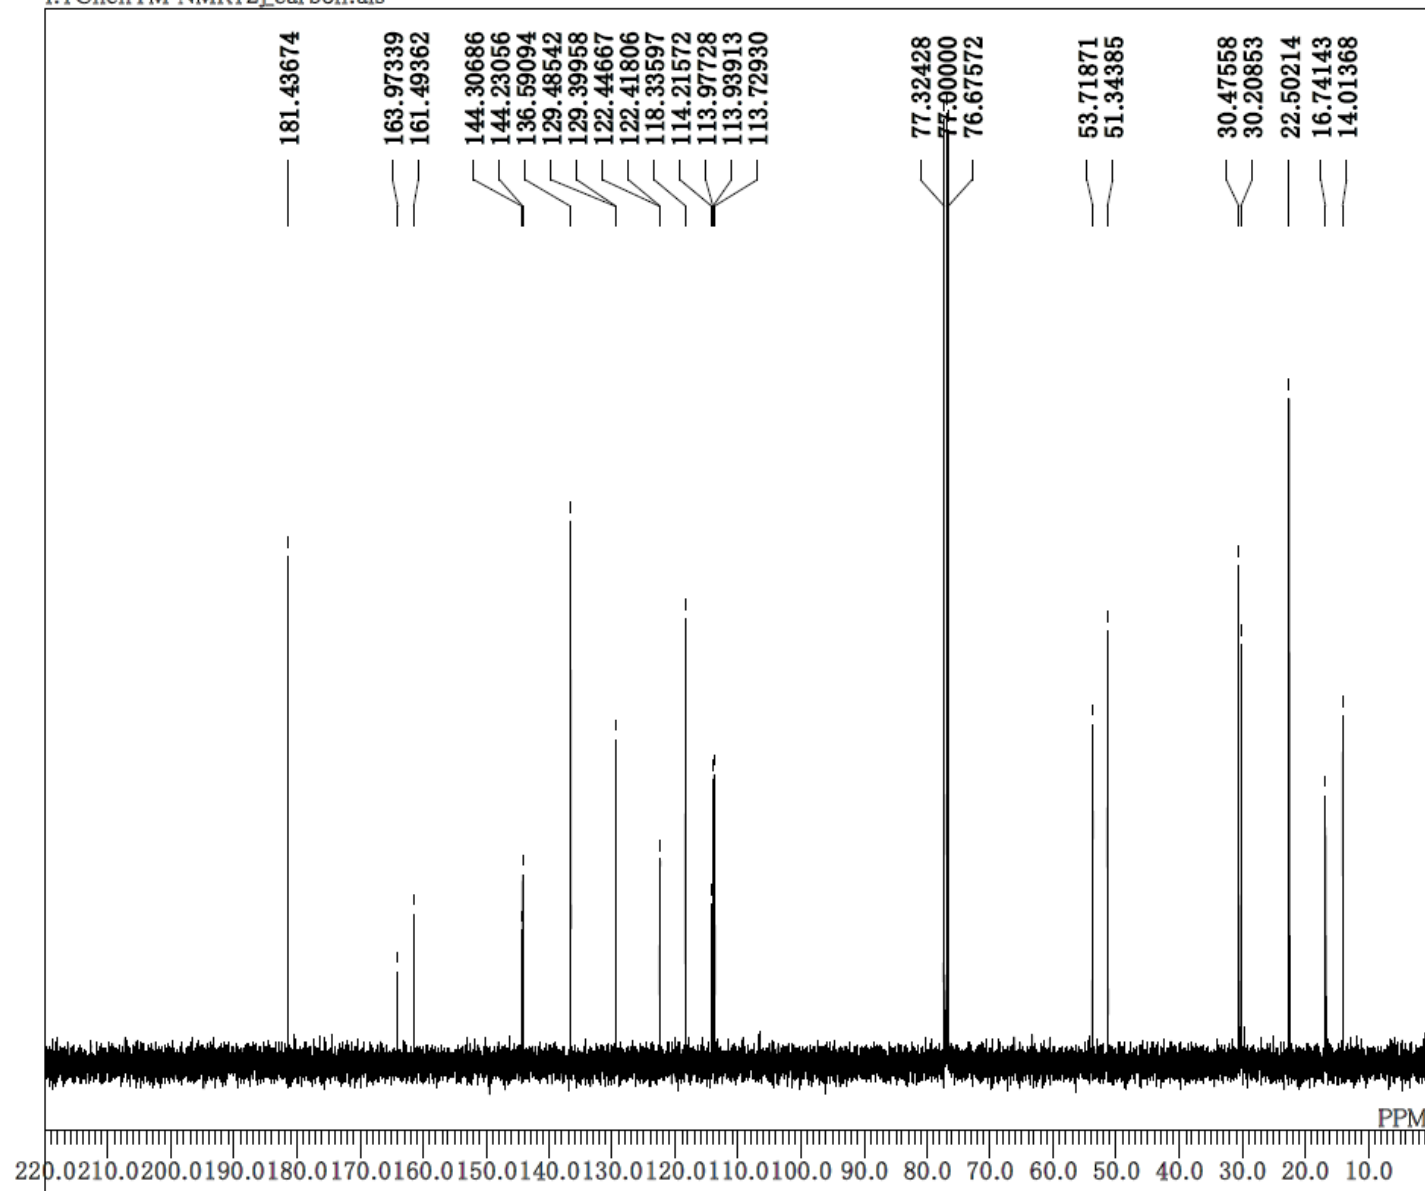

C:\Users\alice\Desktop\ChenTM NMR\2j.F.als

2j.F.als  
DFILE  
COMNT  
DATIM 2020-06-16 01:31:57  
OBNUC 19F  
EXMOD proton.jxp  
OBFRQ 368.64 MHz  
OBSET 7.63 KHz  
OBFIN 2.85 Hz  
POINT 13107  
FREQU 149253.73 Hz  
SCANS 16  
ACQTM 0.0878 sec  
PD 6.0000 sec  
PW1 4.10 usec  
IRNUC 19F  
CTEMP 21.0 c  
SLVNT CDCL3  
EXREF 0.00 ppm  
BF 0.12 Hz  
RGAIN 50

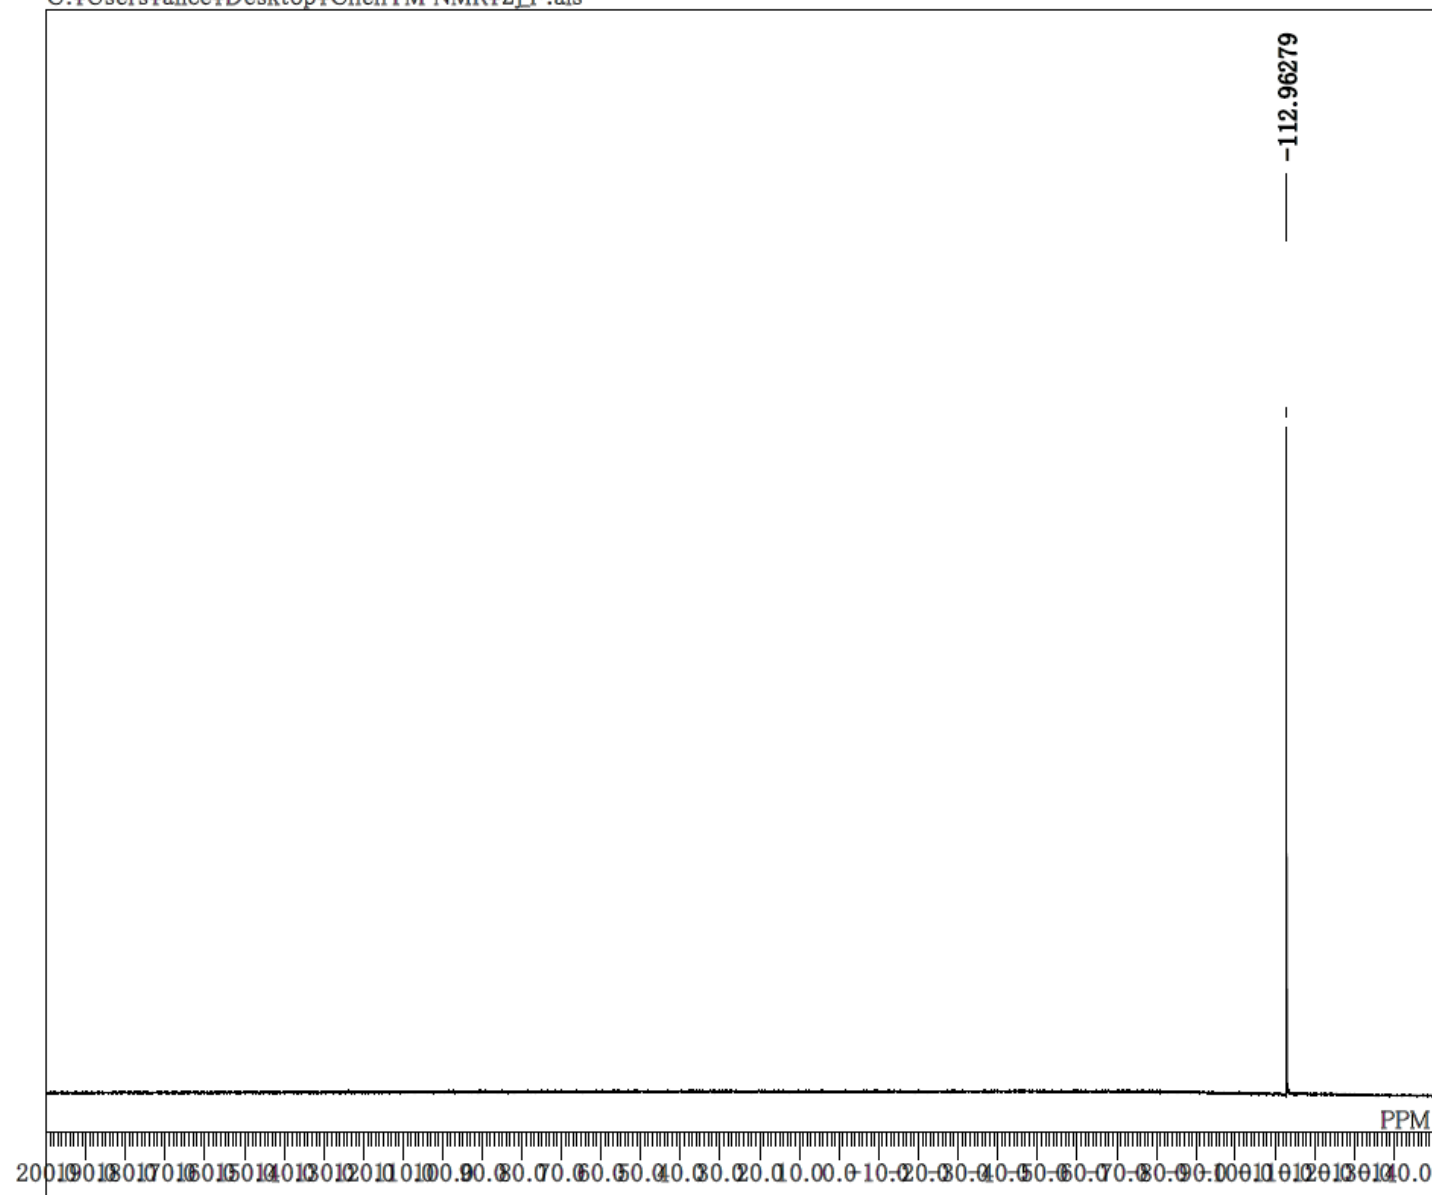

C:\Users\Valice\Desktop\ChenTM NMR\2j'\_proton.als

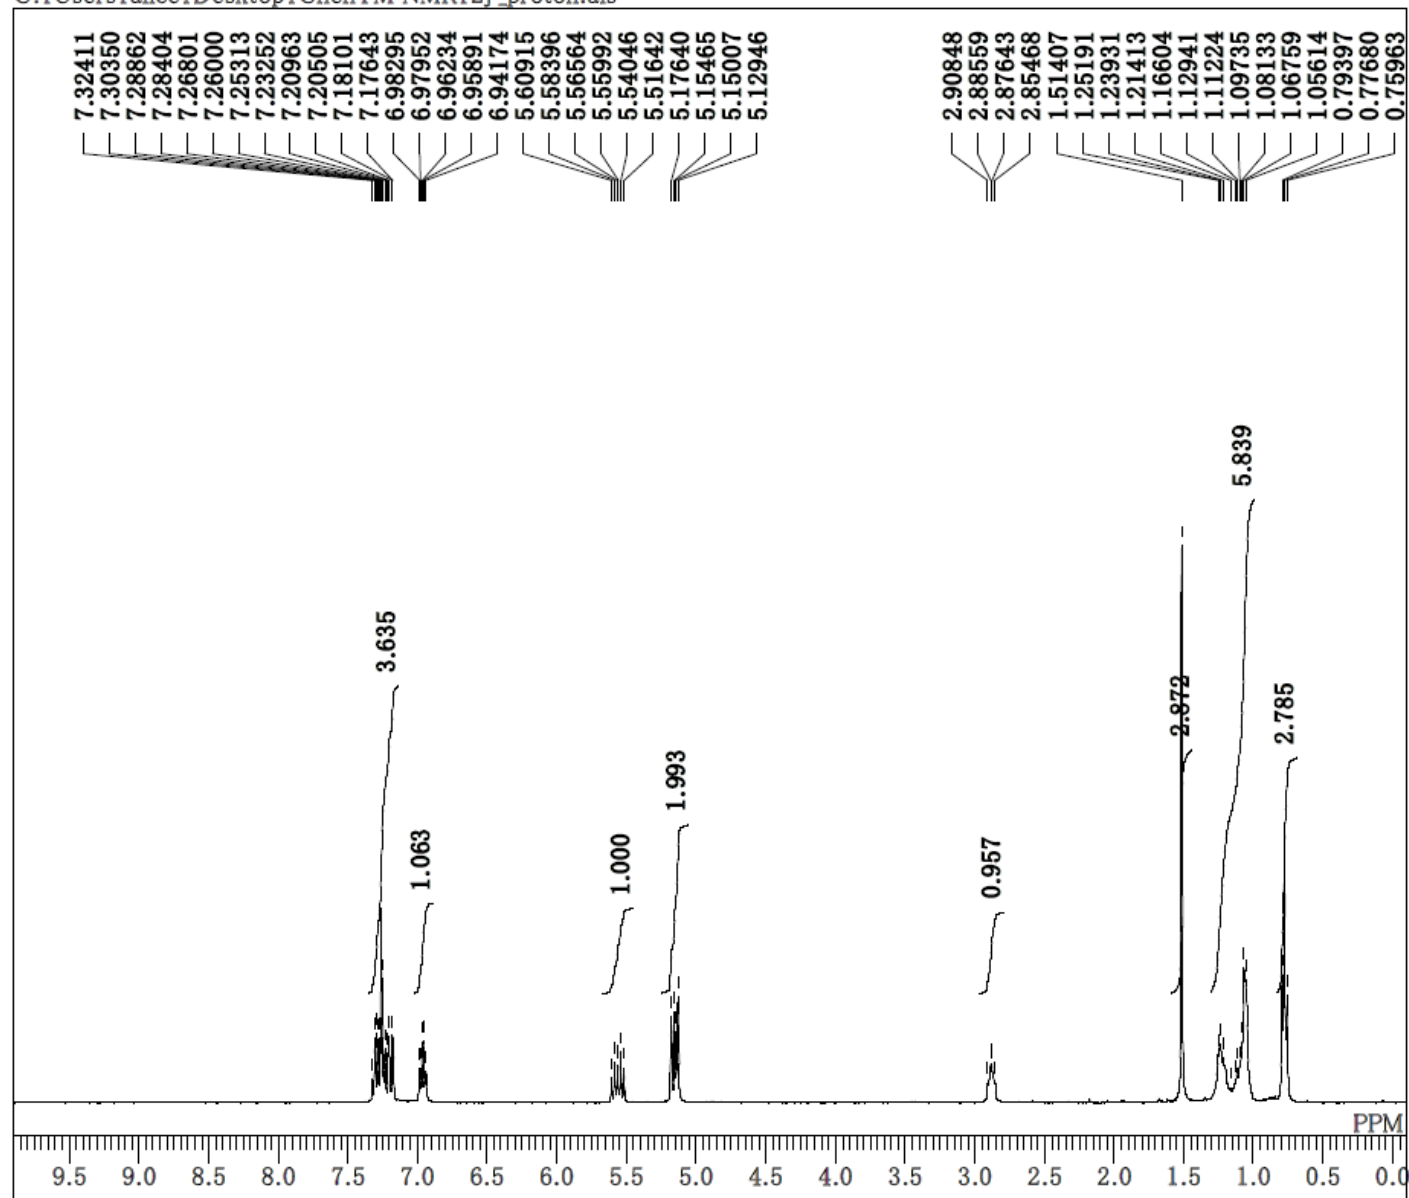

2j'\_proton.als  
 12-11-2019 20:32:28  
 1H  
 proton.jxp  
 391.78 MHz  
 8.51 KHz  
 3.34 Hz  
 13107  
 5878.90 Hz  
 8  
 2.2295 sec  
 6.0000 sec  
 5.17 usec  
 1H  
 20.7 c  
 CDCL3  
 7.26 ppm  
 1.20 Hz  
 42

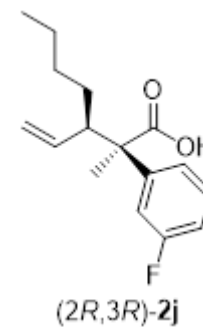

C:\Users\Valice\Desktop\ChenTM NMR\2j'\_carbon.als

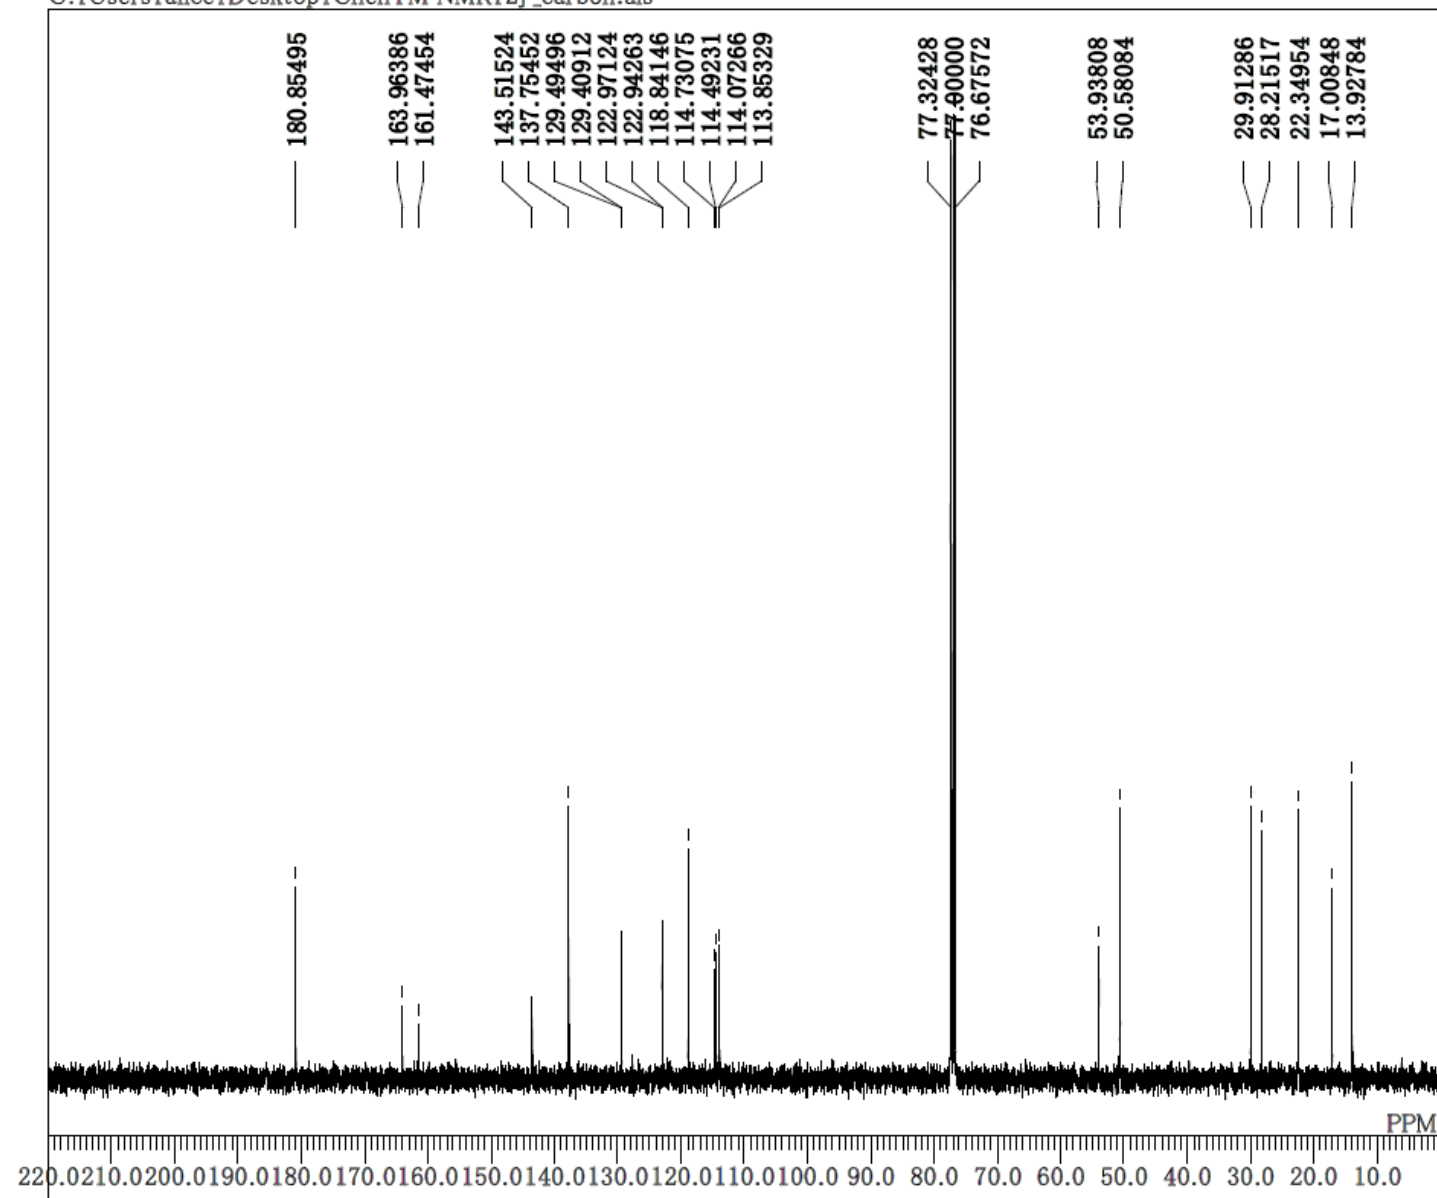

DFILE 2j'\_carbon.als  
 COMNT  
 DATIM 12-11-2019 21:04:26  
 OBNUC 13C  
 EXMOD carbon.jpg  
 OBFRQ 98.52 MHz  
 OBSET 4.64 KHz  
 OBFIN 8.74 Hz  
 POINT 26214  
 FREQU 24630.54 Hz  
 SCANS 121  
 ACQTM 1.0643 sec  
 PD 2.0000 sec  
 PW1 3.12 usec  
 IRNUC 1H  
 CTEMP 20.8 c  
 SLVNT CDCL3  
 EXREF 77.00 ppm  
 BF 1.20 Hz  
 RGAIN 60

C:\Users\Valice\Desktop\ChenTM NMR\2j'\_F.als

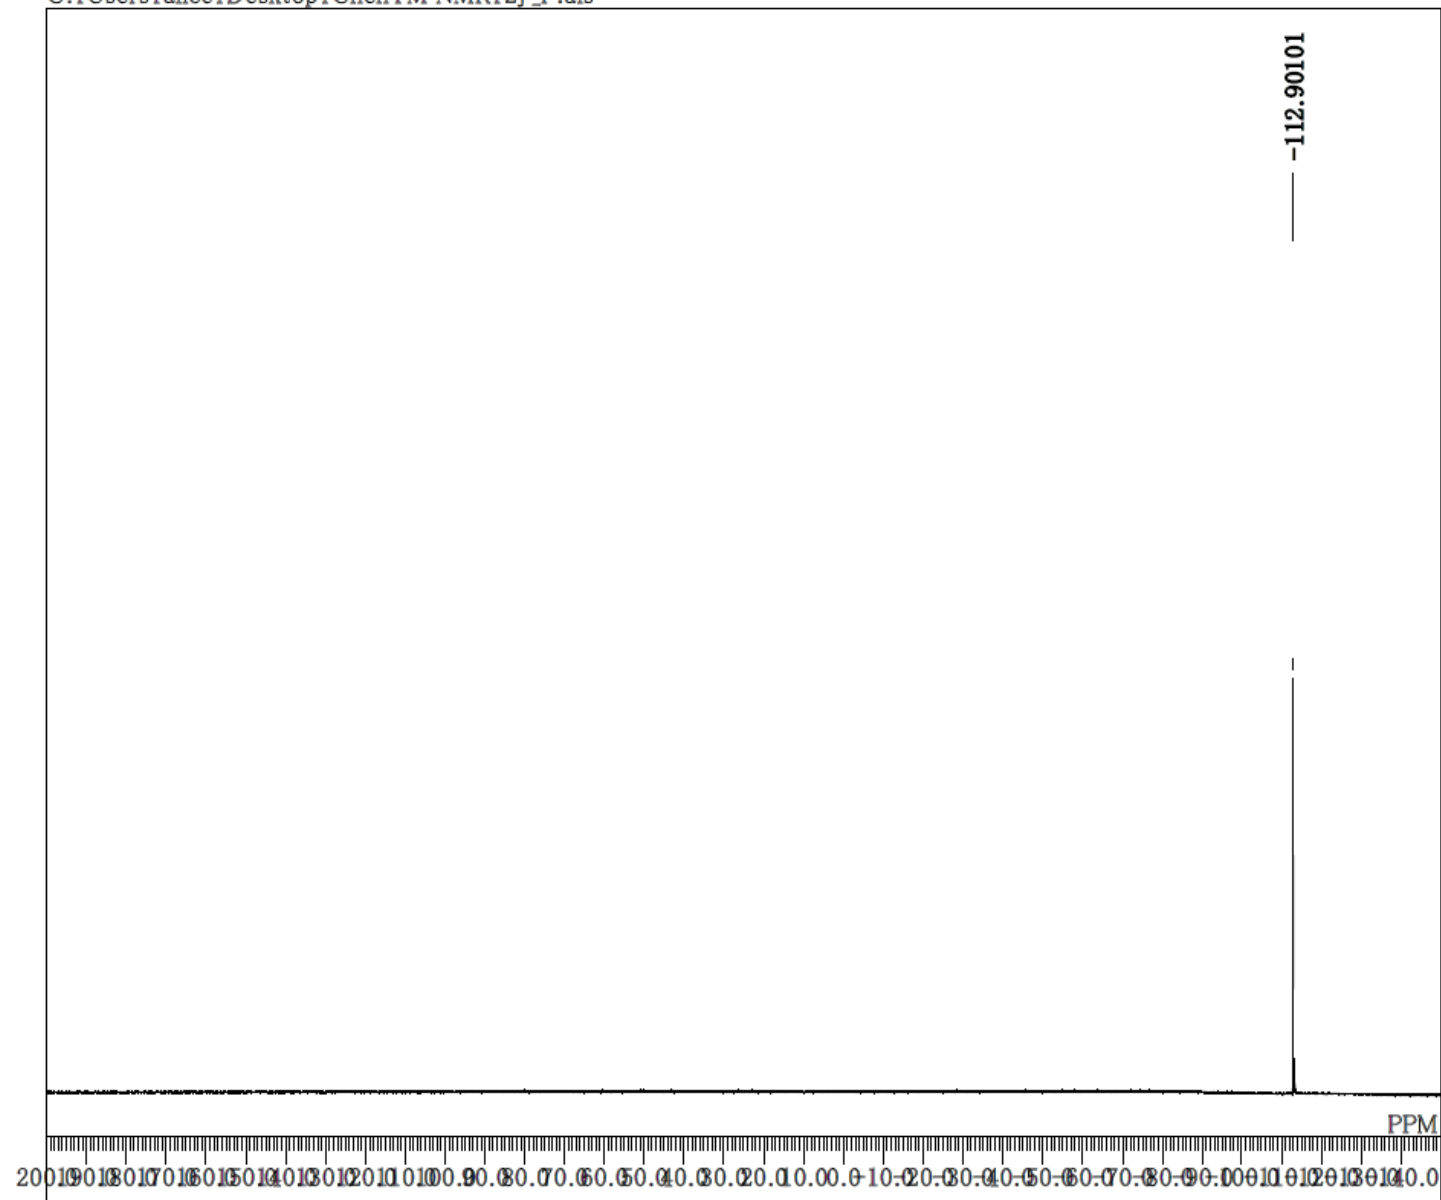

2j'\_F.als

|       |                     |
|-------|---------------------|
| DFILE | 2j'_F.als           |
| COMNT |                     |
| DATIM | 16-06-2020 01:53:47 |
| OBNUC | 19F                 |
| EXMOD | proton.jxp          |
| OBFRQ | 368.64 MHz          |
| OBSET | 7.63 KHz            |
| OBFIN | 2.85 Hz             |
| POINT | 13107               |
| FREQU | 149253.73 Hz        |
| SCANS | 16                  |
| ACQTM | 0.0878 sec          |
| PD    | 6.0000 sec          |
| PW1   | 4.10 usec           |
| IRNUC | 19F                 |
| CTEMP | 20.9 c              |
| SLVNT | CDCL3               |
| EXREF | 0.00 ppm            |
| BF    | 0.12 Hz             |
| RGAIN | 50                  |

C:\Users\Valice\Desktop\ChenTM NMR\2k\_proton.als

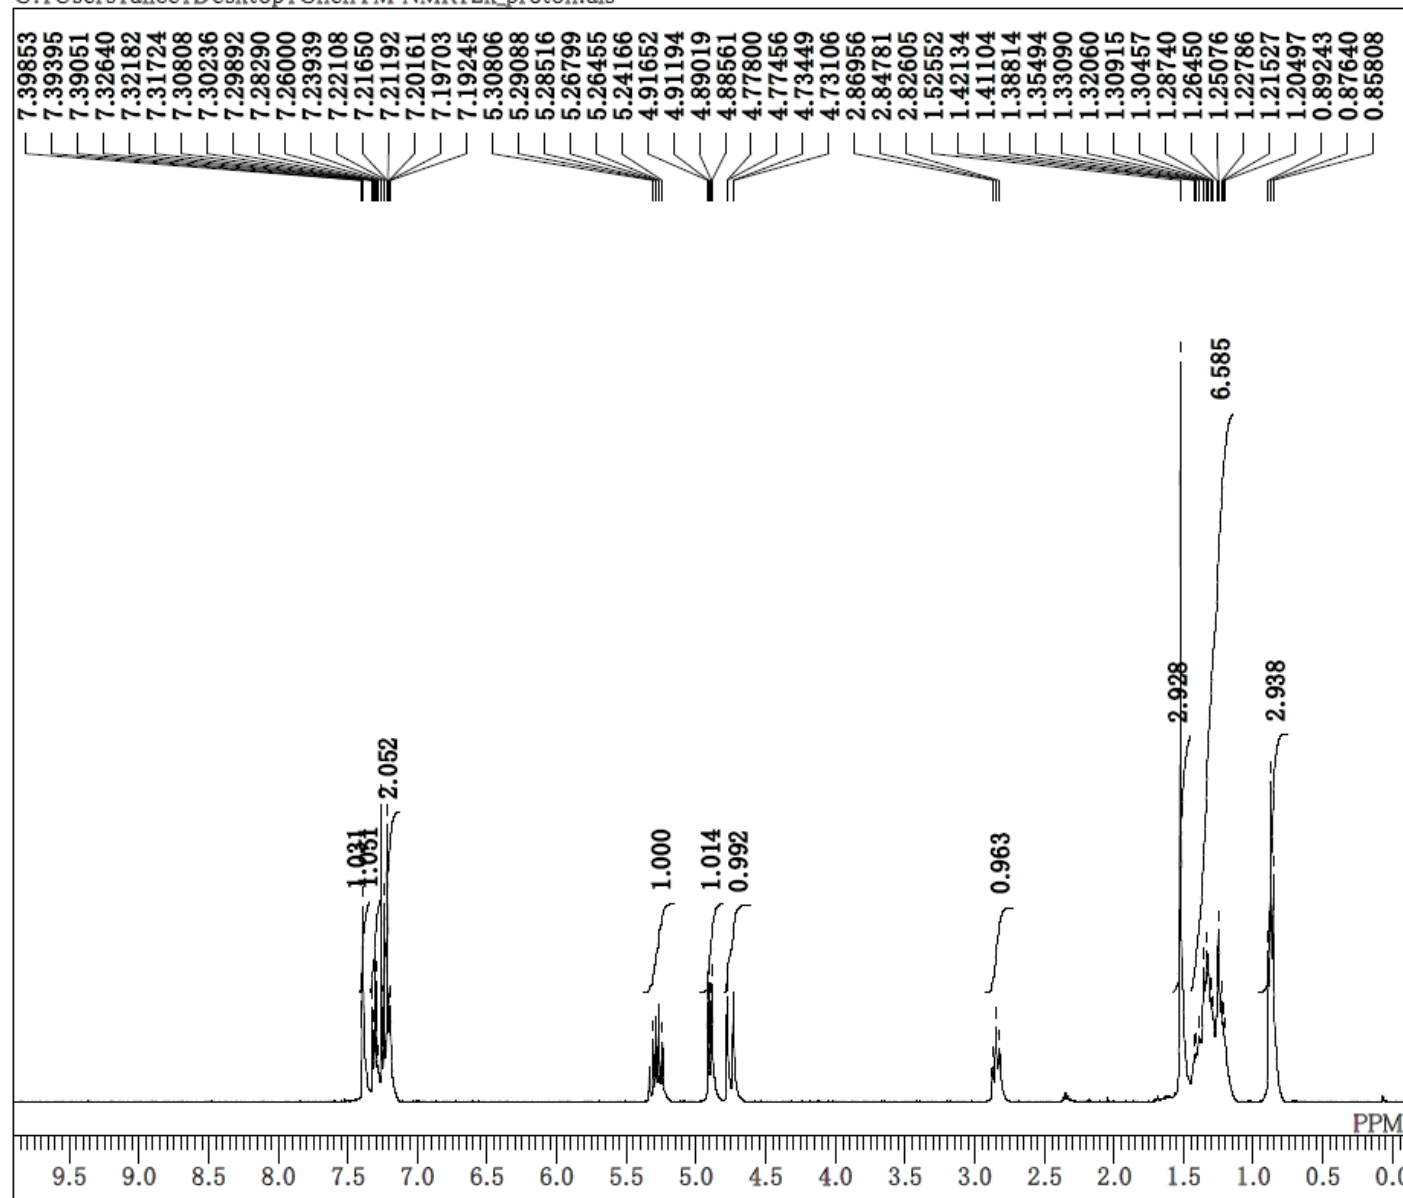

DFILE 2k\_proton.als  
 COMNT  
 DATIM 17-03-2020 02:15:58  
 OBNUC 1H  
 EXMOD proton.jxp  
 OBFRQ 391.78 MHz  
 OBSET 8.51 KHz  
 OBFIN 3.34 Hz  
 POINT 13107  
 FREQU 5878.90 Hz  
 SCANS 8  
 ACQTM 2.2295 sec  
 PD 6.0000 sec  
 PW1 5.17 usec  
 IRNUC 1H  
 CTEMP 20.0 c  
 SLVNT CDCL3  
 EXREF 7.26 ppm  
 BF 0.12 Hz  
 RGAIN 40

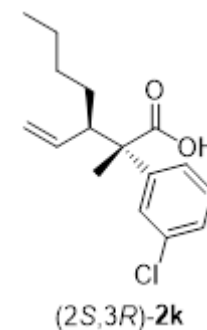

C:\Users\alice\Desktop\ChenTM NMR\2k\_carbon.als

DFILE 2k\_carbon.als  
 COMNT  
 DATIM 31-08-2019 12:45:36  
 OBNUC <sup>13</sup>C  
 EXMOD carbon.jpg  
 OBFRQ 98.52 MHz  
 OBSET 4.64 KHz  
 OBFIN 8.74 Hz  
 POINT 26214  
 FREQU 24630.54 Hz  
 SCANS 108  
 ACQTM 1.0643 sec  
 PD 2.0000 sec  
 PW1 3.12 usec  
 IRNUC <sup>1</sup>H  
 CTEMP 21.1 c  
 SLVNT CDCL<sub>3</sub>  
 EXREF 77.00 ppm  
 BF 0.12 Hz  
 RGAIN 60

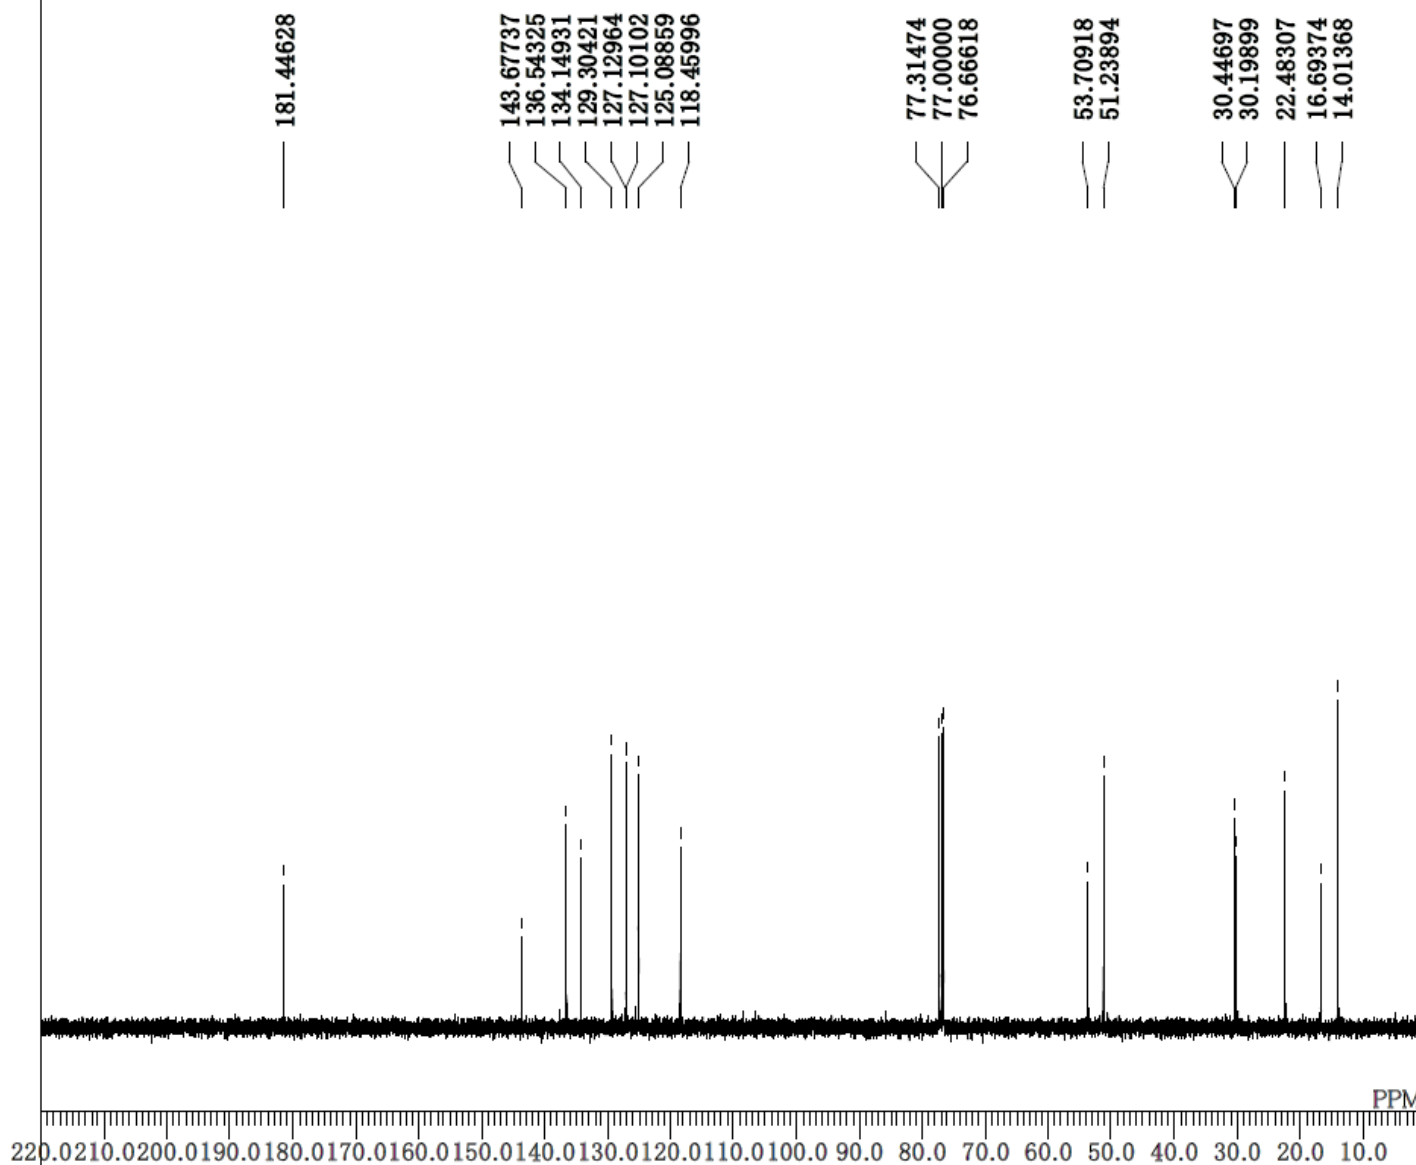



C:\Users\alice\Desktop\ChenTM NMR\2k'\_proton.als

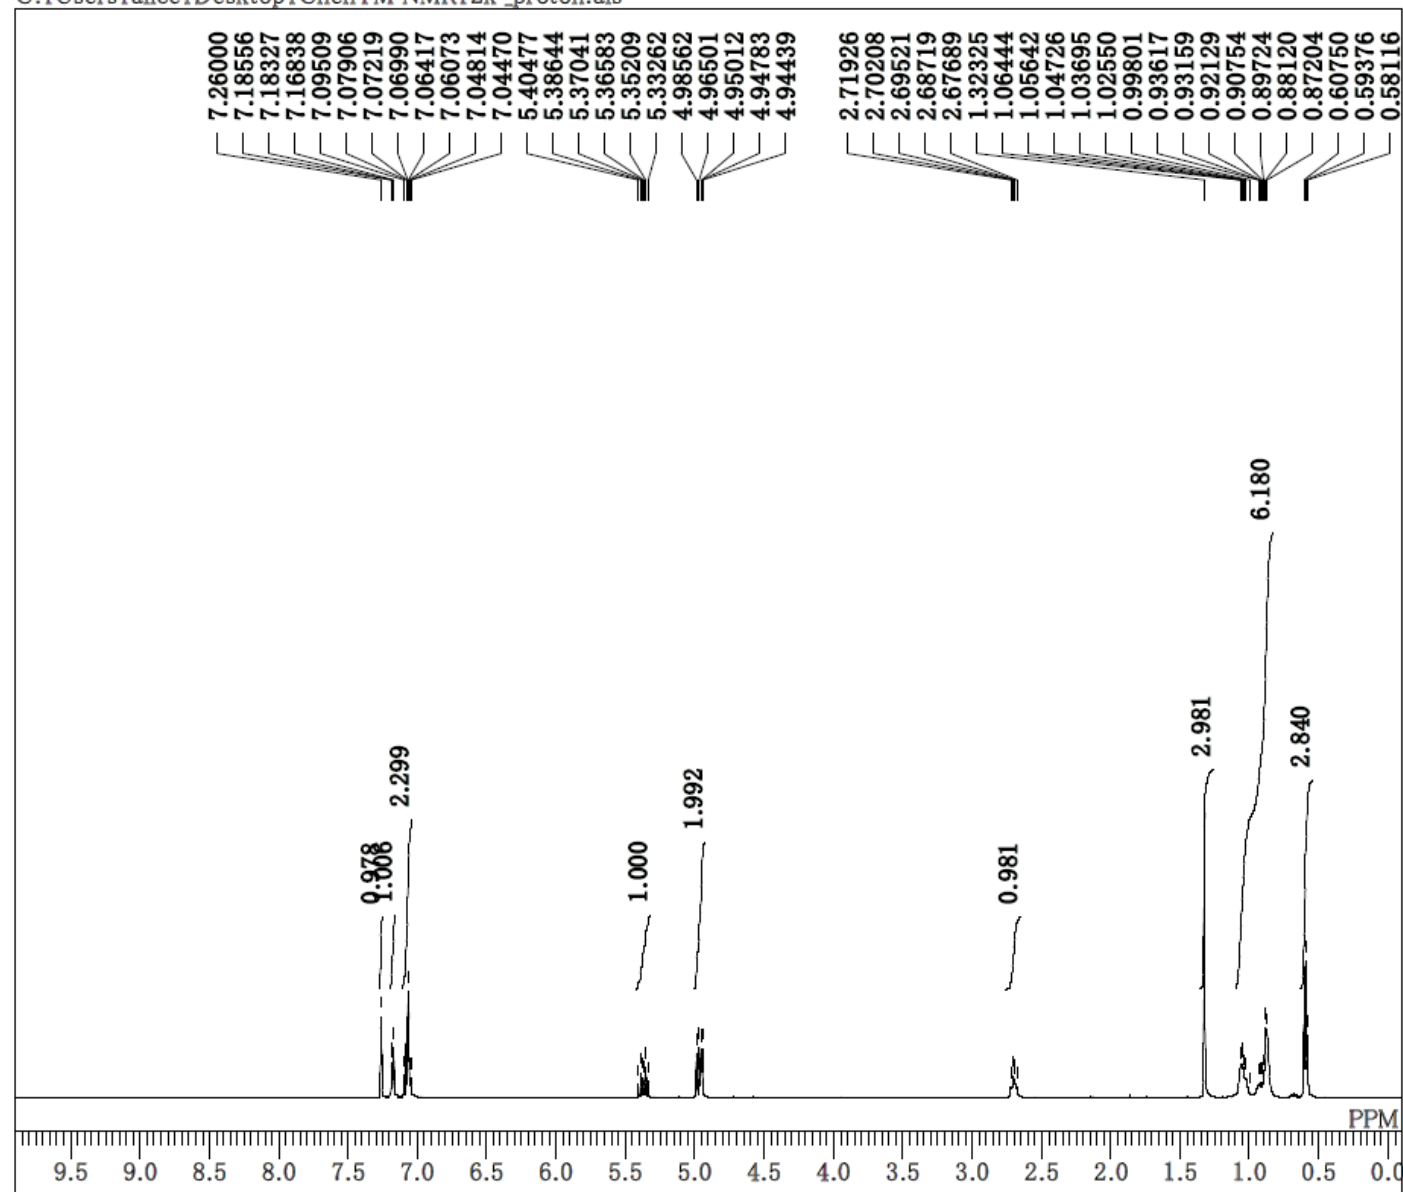

2k'\_proton.als

|       |                     |
|-------|---------------------|
| DFILE | 2k'_proton.als      |
| COMNT |                     |
| DATIM | 2019-10-04 15:44:49 |
| OBNUC | <sup>1</sup> H      |
| EXMOD | proton.jxp          |
| OBFRQ | 500.16 MHz          |
| OBSET | 2.41 KHz            |
| OBFIN | 6.01 Hz             |
| POINT | 13107               |
| FREQU | 7507.51 Hz          |
| SCANS | 8                   |
| ACQTM | 1.7459 sec          |
| PD    | 6.0000 sec          |
| PW1   | 5.55 usec           |
| IRNUC | <sup>1</sup> H      |
| CTEMP | 21.9 c              |
| SLVNT | CDCL <sub>3</sub>   |
| EXREF | 7.26 ppm            |
| BF    | 0.12 Hz             |
| RGAIN | 38                  |

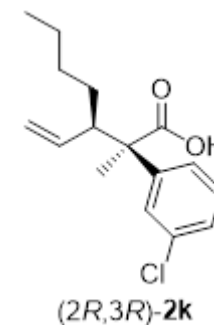

C:\Users\Valice\Desktop\ChenTM NMR\2k'\_carbon.als

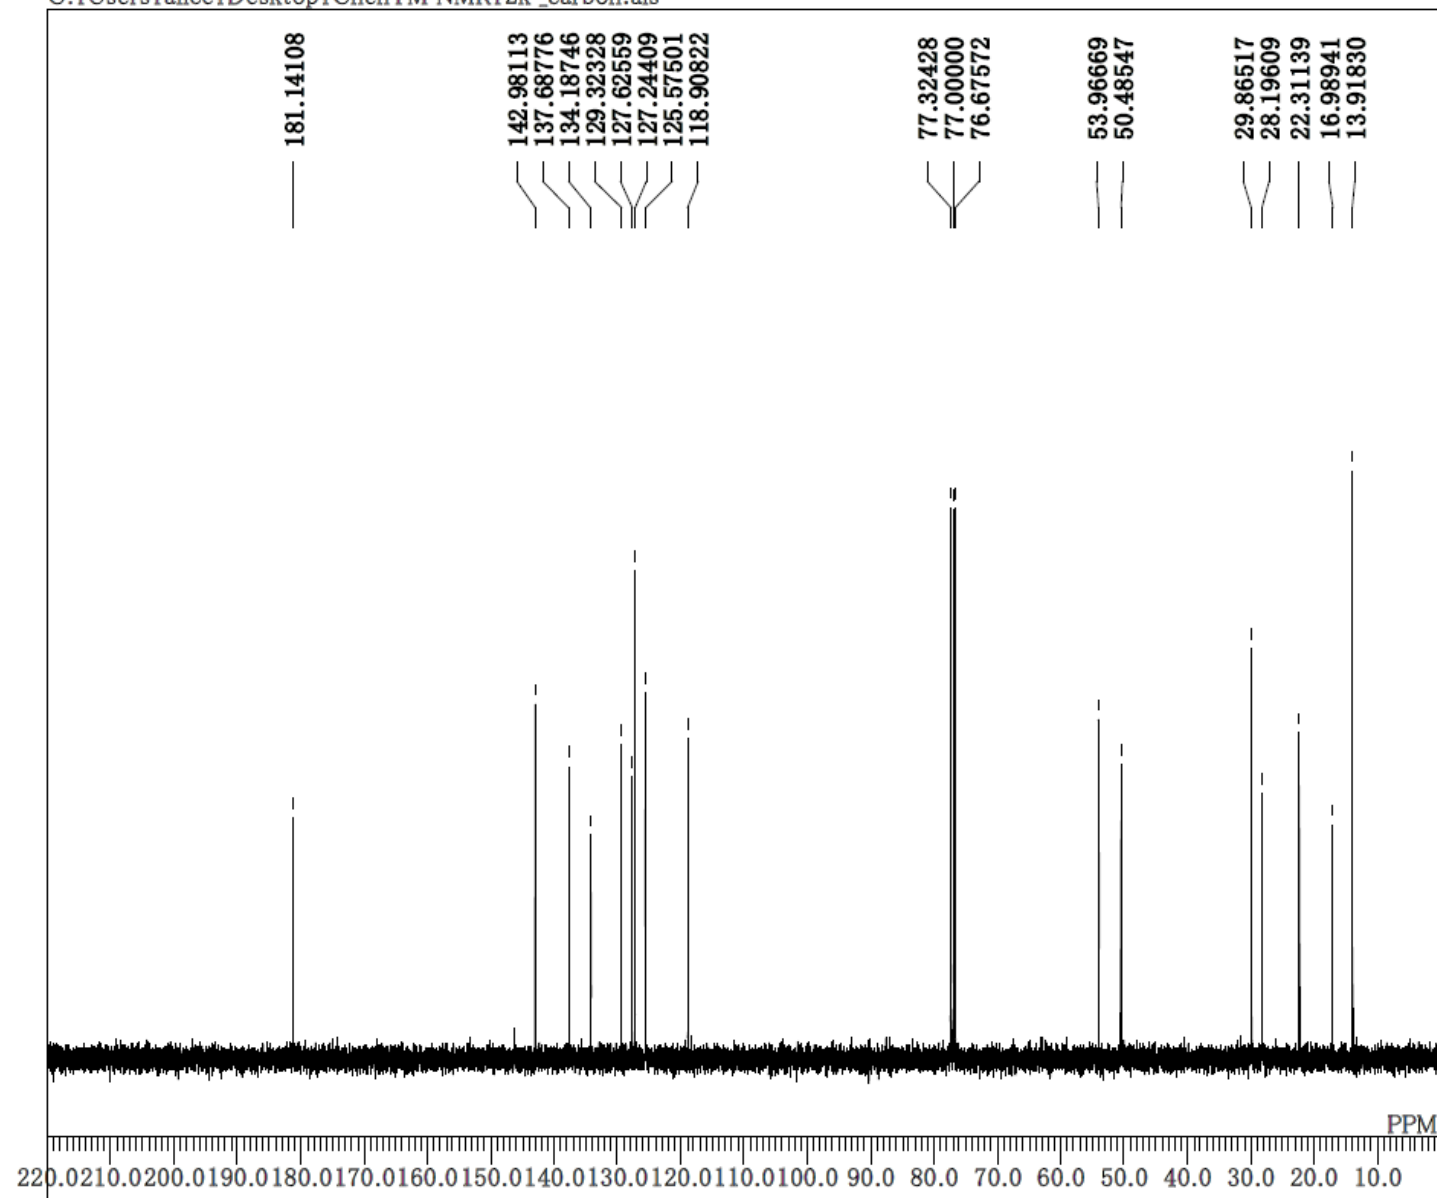

DFILE 2k'\_carbon.als  
 COMNT  
 DATIM 04-10-2019 19:03:44  
 OBNUC 13C  
 EXMOD carbon.jpg  
 OBFRQ 98.52 MHz  
 OBSET 4.64 KHz  
 OBFIN 8.74 Hz  
 POINT 26214  
 FREQU 24630.54 Hz  
 SCANS 101  
 ACQTM 1.0643 sec  
 PD 2.0000 sec  
 PW1 3.12 usec  
 IRNUC 1H  
 CTEMP 21.1 c  
 SLVNT CDCL3  
 EXREF 77.00 ppm  
 BF 0.12 Hz  
 RGAIN 60

C:\Users\alice\Desktop\ChenTM NMR\2l\_proton.als

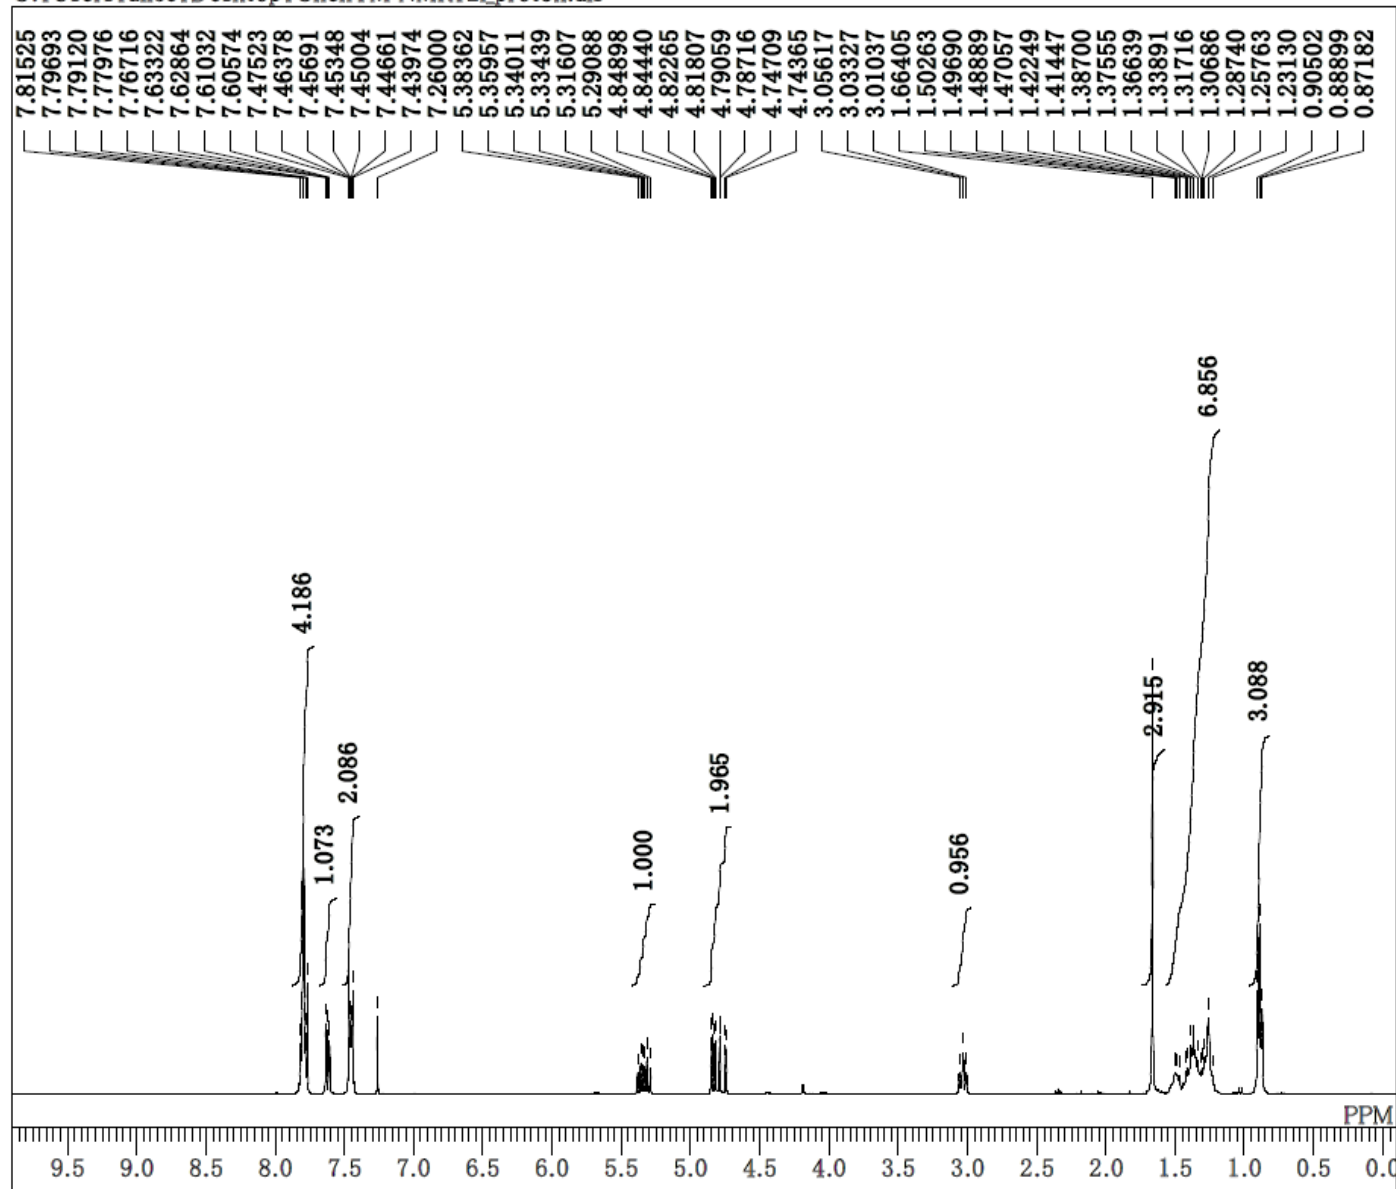

DFILE 2l\_proton.als  
 COMNT  
 DATIM 06-03-2020 21:20:56  
 OBNUC 1H  
 EXMOD proton.jxp  
 OBFRQ 391.78 MHz  
 OBSET 8.51 KHz  
 OBFIN 3.34 Hz  
 POINT 13107  
 FREQU 5878.90 Hz  
 SCANS 8  
 ACQTM 2.2295 sec  
 PD 6.0000 sec  
 PW1 5.17 usec  
 IRNUC 1H  
 CTEMP 20.2 c  
 SLVNT CDCL3  
 EXREF 7.26 ppm  
 BF 0.12 Hz  
 RGAIN 36

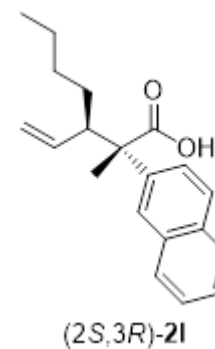

I:\Chen\2l\_carbon-1-1.jdf

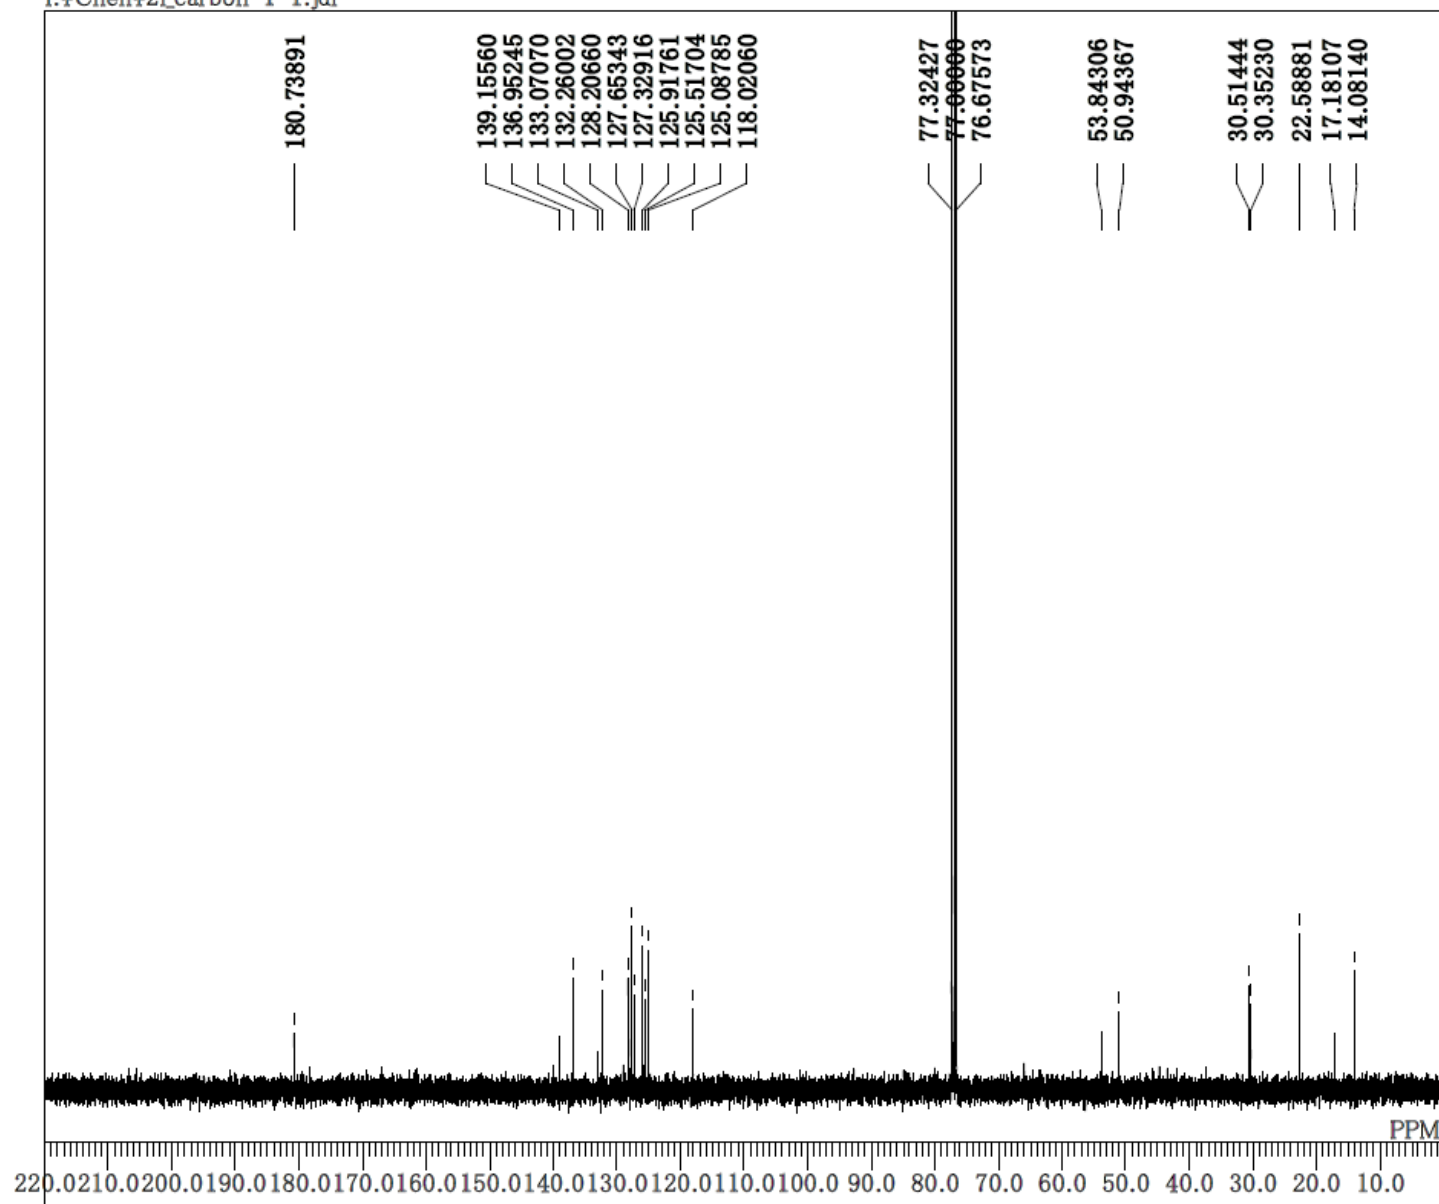

|       |                     |
|-------|---------------------|
| DFILE | 2l_carbon-1-1.jdf   |
| COMNT |                     |
| DATIM | 2021-05-13 23:38:15 |
| OBNUC | <sup>13</sup> C     |
| EXMOD | carbon.jxp          |
| OBFRQ | 98.52 MHz           |
| OBSET | 4.64 KHz            |
| OBFIN | 8.74 Hz             |
| POINT | 32767               |
| FREQU | 30788.18 Hz         |
| SCANS | 614                 |
| ACQTM | 1.0643 sec          |
| PD    | 2.0000 sec          |
| PW1   | 3.12 usec           |
| IRNUC | <sup>1</sup> H      |
| CTEMP | 21.2 c              |
| SLVNT | CDCL <sub>3</sub>   |
| EXREF | 77.00 ppm           |
| BF    | 0.12 Hz             |
| RGAIN | 60                  |

C:\Users\valice\Desktop\ChenTM NMR\2l'\_proton.als

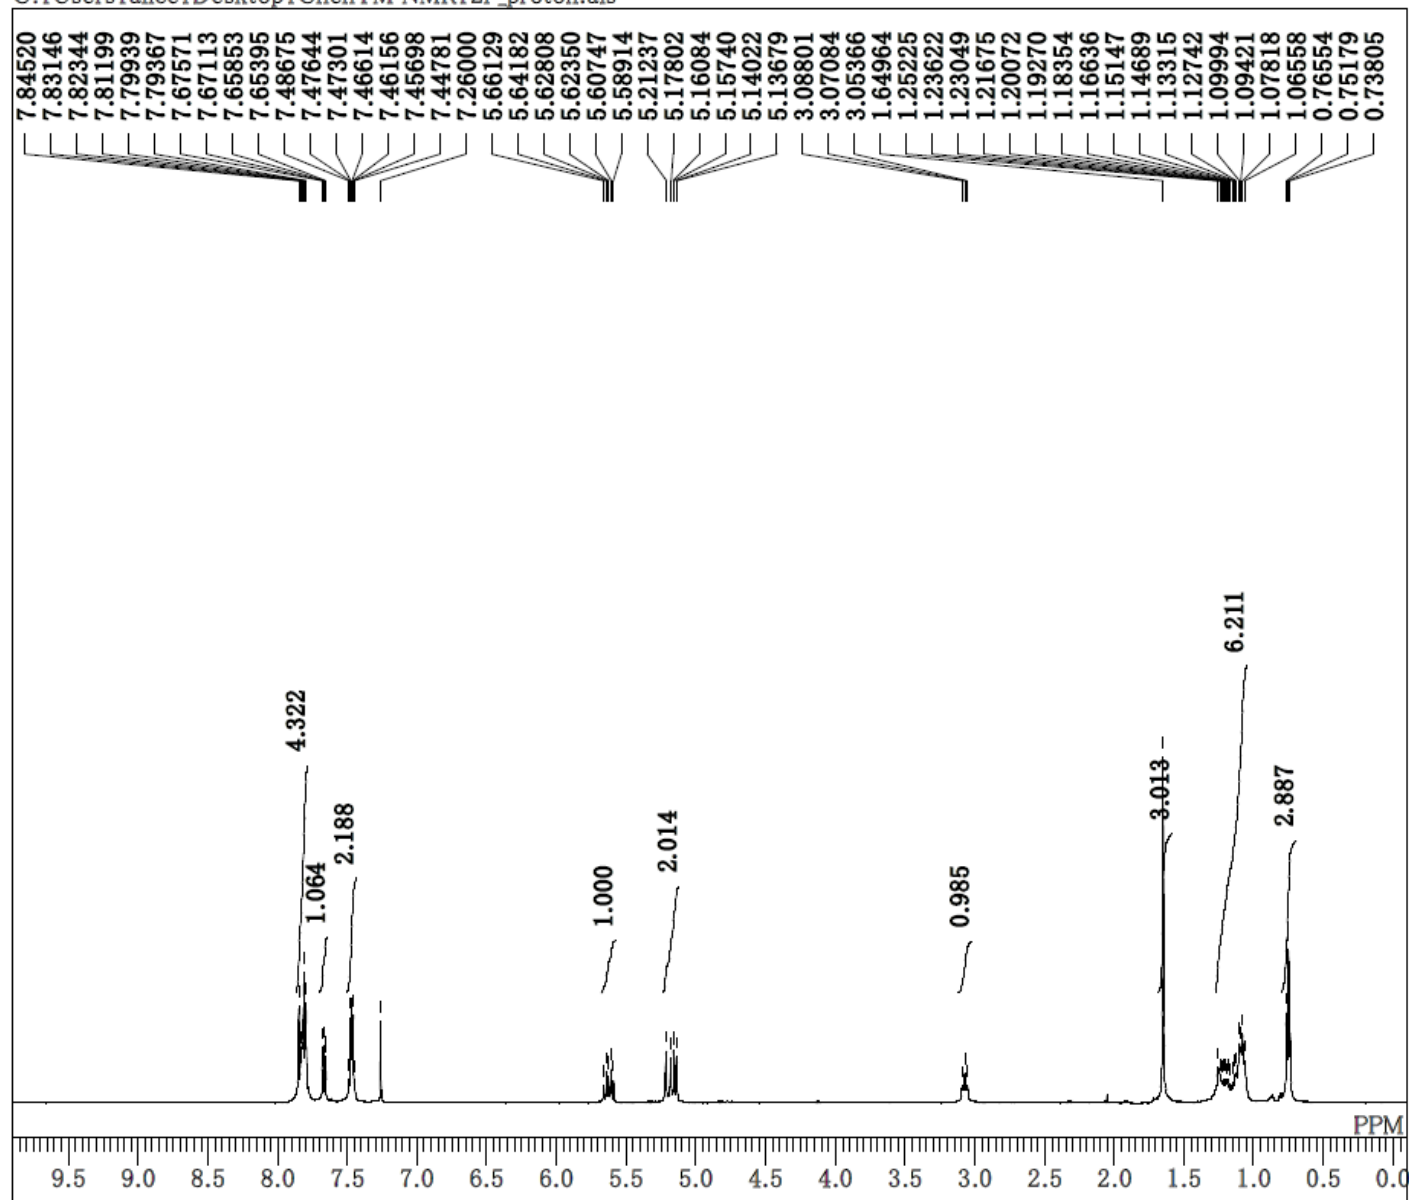

2l'\_proton.als  
 2019-09-25 14:47:45  
 1H  
 proton.jxp  
 500.16 MHz  
 2.41 KHz  
 6.01 Hz  
 13107  
 7507.51 Hz  
 8  
 1.7459 sec  
 6.0000 sec  
 5.55 usec  
 1H  
 21.7 c  
 CDCL3  
 7.26 ppm  
 0.12 Hz  
 40

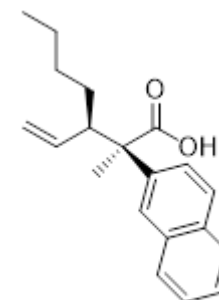

(2R,3R)-2l'

C:\Users\Valice\Desktop\ChenTM NMR\21'\_carbon.als

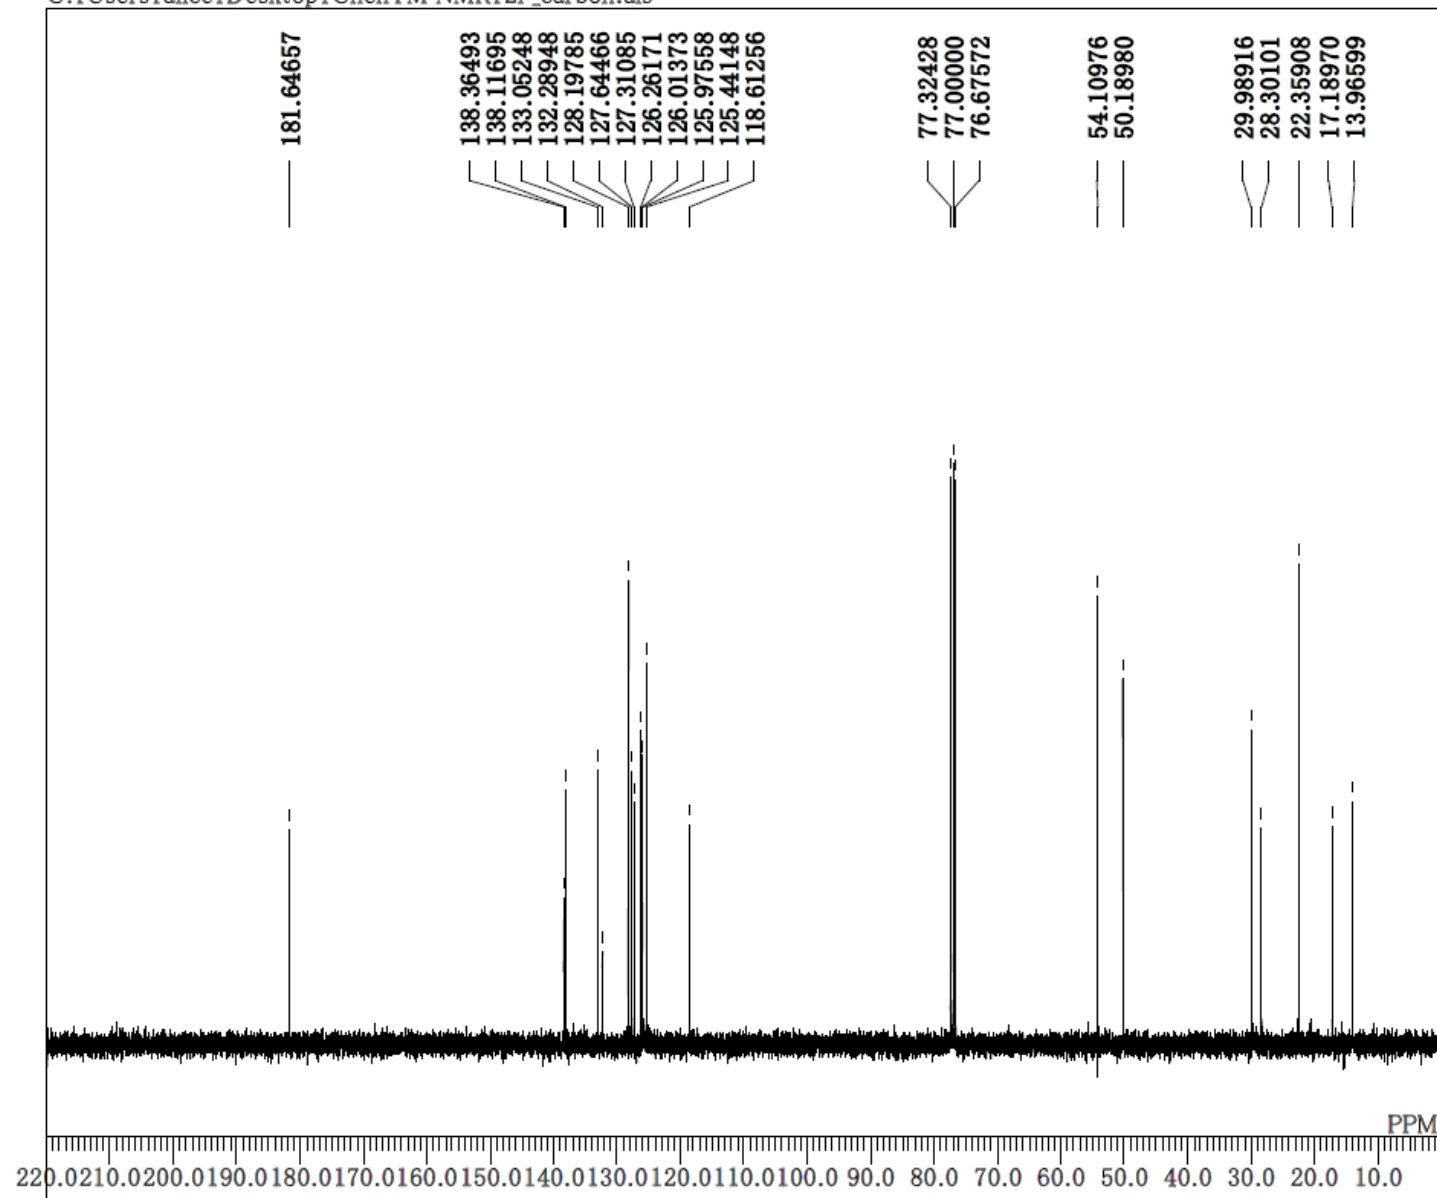

DFILE 21'\_carbon.als  
 COMNT  
 DATIM 25-09-2019 16:52:27  
 OBNUC 13C  
 EXMOD carbon.jpg  
 OBFRQ 98.52 MHz  
 OBSET 4.64 KHz  
 OBFIN 8.74 Hz  
 POINT 26214  
 FREQU 24630.54 Hz  
 SCANS 105  
 ACQTM 1.0643 sec  
 PD 2.0000 sec  
 PW1 3.12 usec  
 IRNUC 1H  
 CTEMP 21.3 c  
 SLVNT CDCL3  
 EXREF 77.00 ppm  
 BF 0.12 Hz  
 RGAIN 60

C:\Users\Valice\Desktop\ChenTM NMR\2m\_proton.als

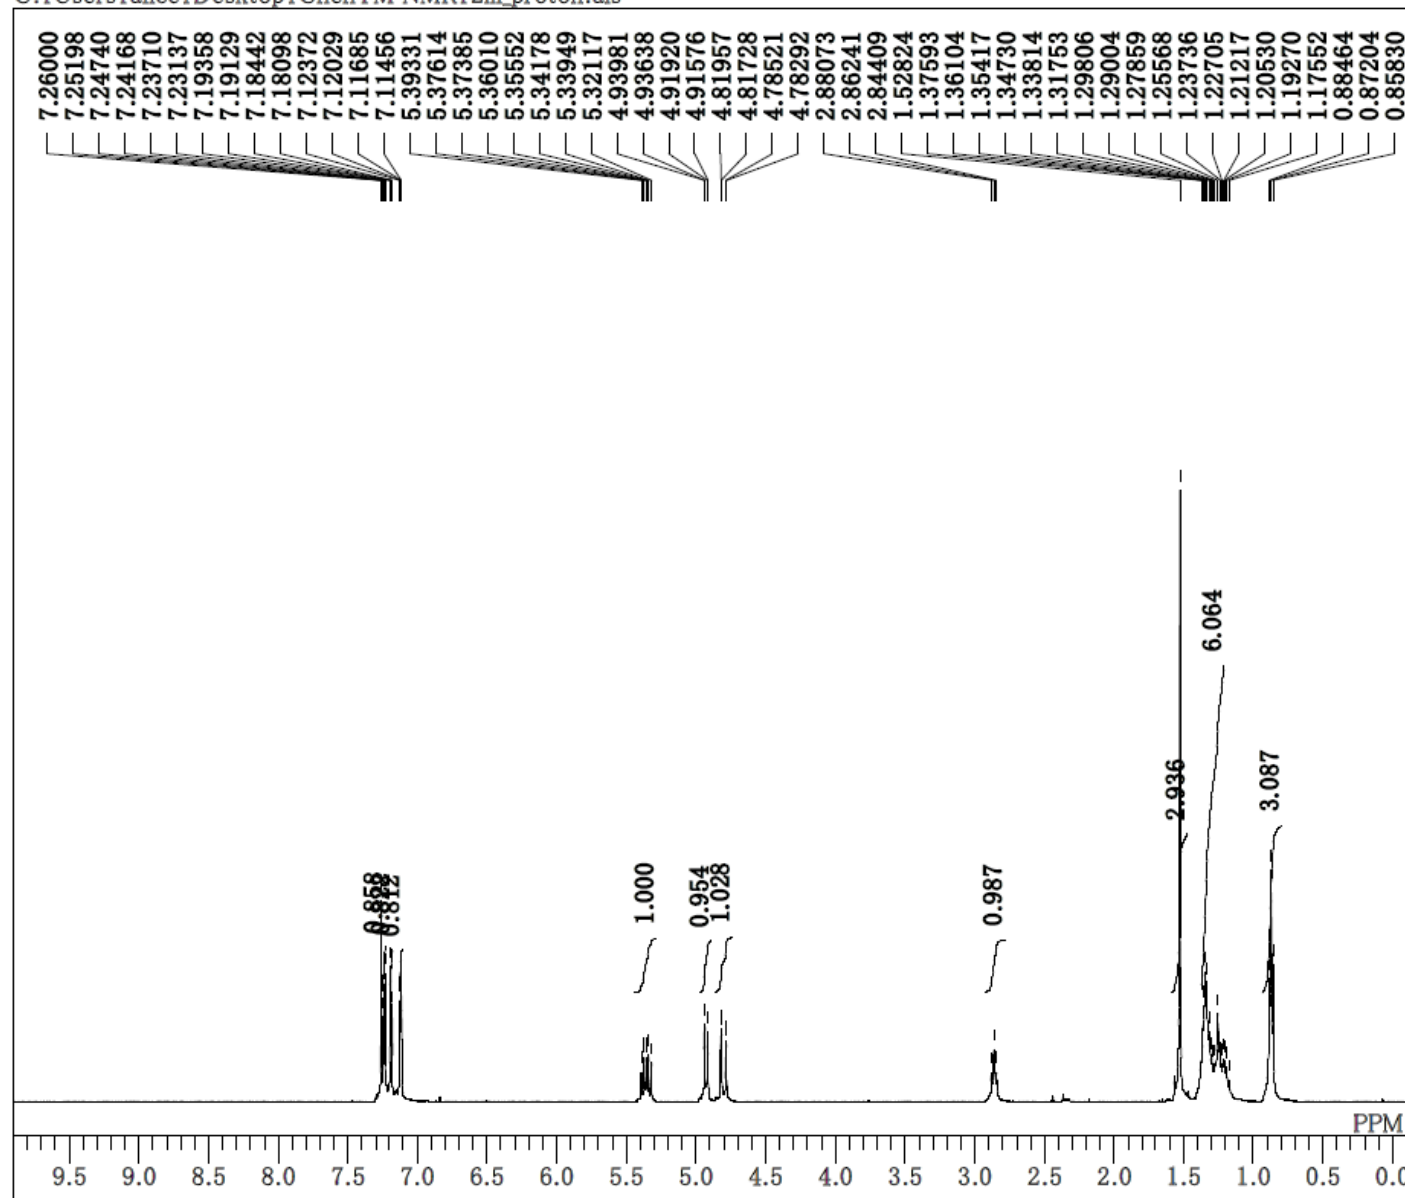

DFILE 2m\_proton.als  
 COMNT  
 DATIM 2019-11-08 13:21:09  
 OBNUC 1H  
 EXMOD proton.jxp  
 OBFRQ 500.16 MHz  
 OBSET 2.41 KHz  
 OBFIN 6.01 Hz  
 POINT 13107  
 FREQU 7507.51 Hz  
 SCANS 8  
 ACQTM 1.7459 sec  
 PD 6.0000 sec  
 PW1 5.55 usec  
 IRNUC 1H  
 CTEMP 21.8 c  
 SLVNT CDCL3  
 EXREF 7.26 ppm  
 BF 0.10 Hz  
 RGAIN 42

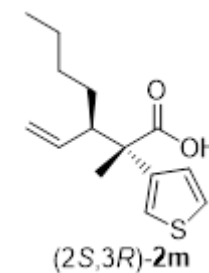

C:\Users\Valice\Desktop\ChenTM NMR\2m\_carbon.als

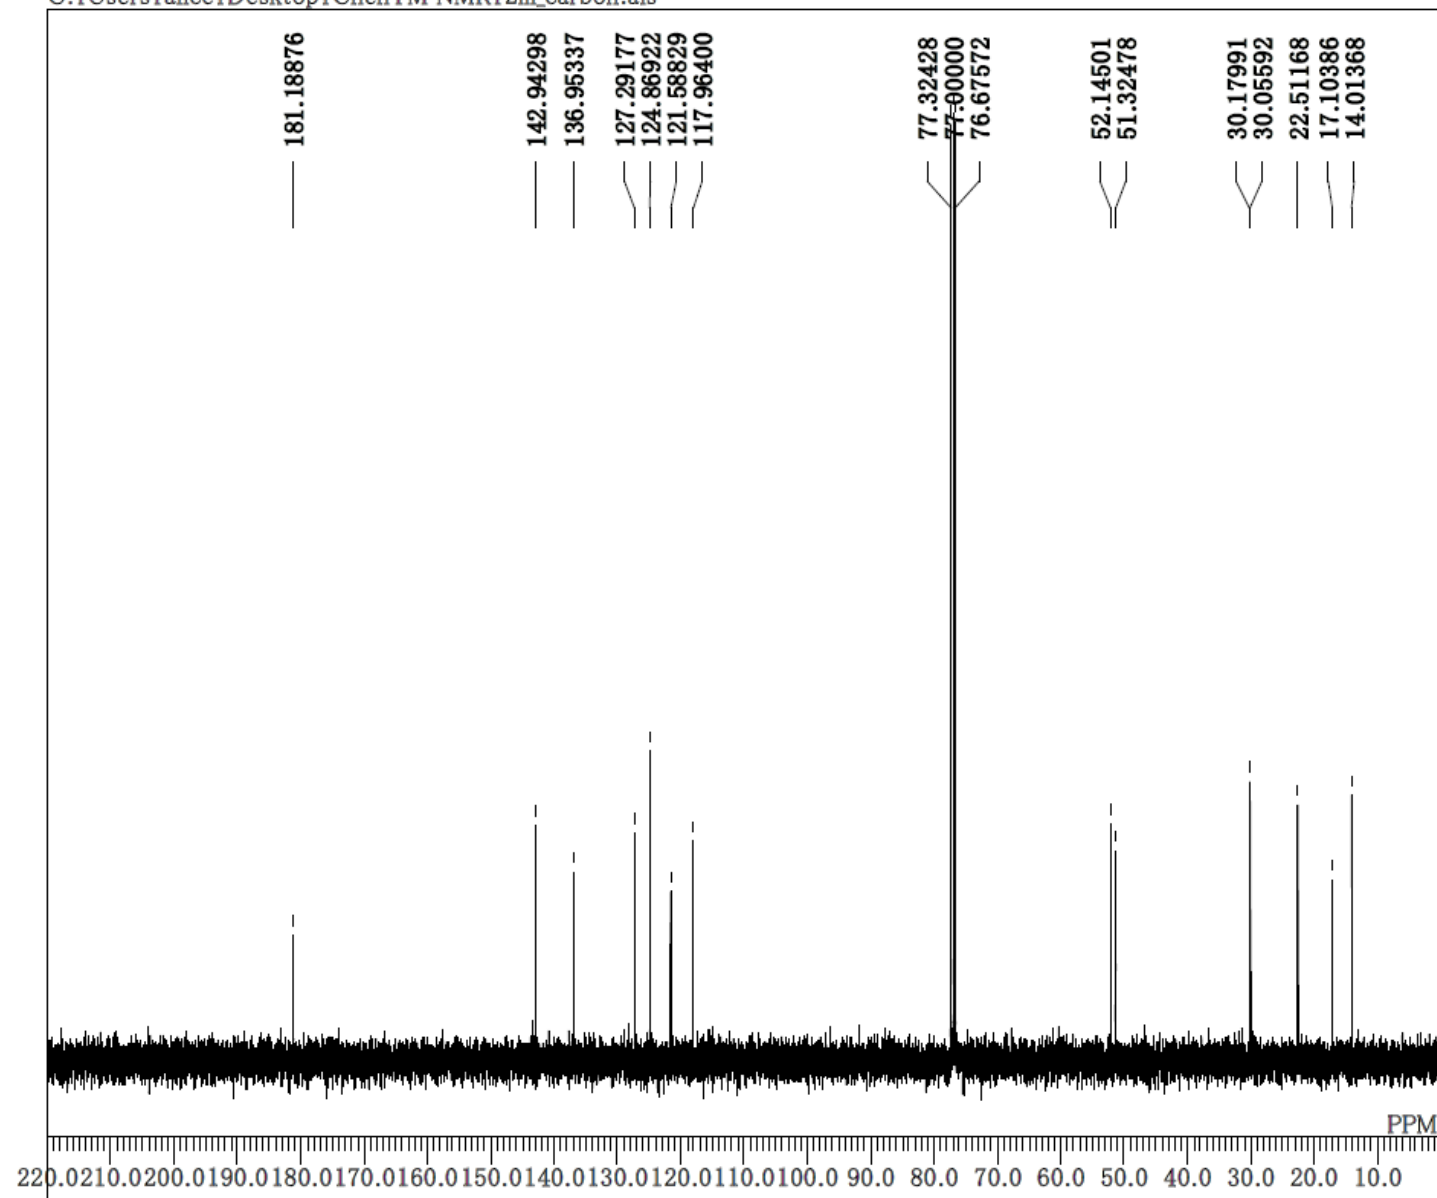

DFILE 2m\_carbon.als  
 COMNT  
 DATIM 08-11-2019 14:15:13  
 OBNUC 13C  
 EXMOD carbon.jpg  
 OBFRQ 98.52 MHz  
 OBSET 4.64 KHz  
 OBFIN 8.74 Hz  
 POINT 26214  
 FREQU 24630.54 Hz  
 SCANS 101  
 ACQTM 1.0643 sec  
 PD 2.0000 sec  
 PW1 3.12 usec  
 IRNUC 1H  
 CTEMP 20.9 c  
 SLVNT CDCL3  
 EXREF 77.00 ppm  
 BF 0.12 Hz  
 RGAIN 60



C:\Users\alice\Desktop\ChenTM NMR\2m'\_proton.als

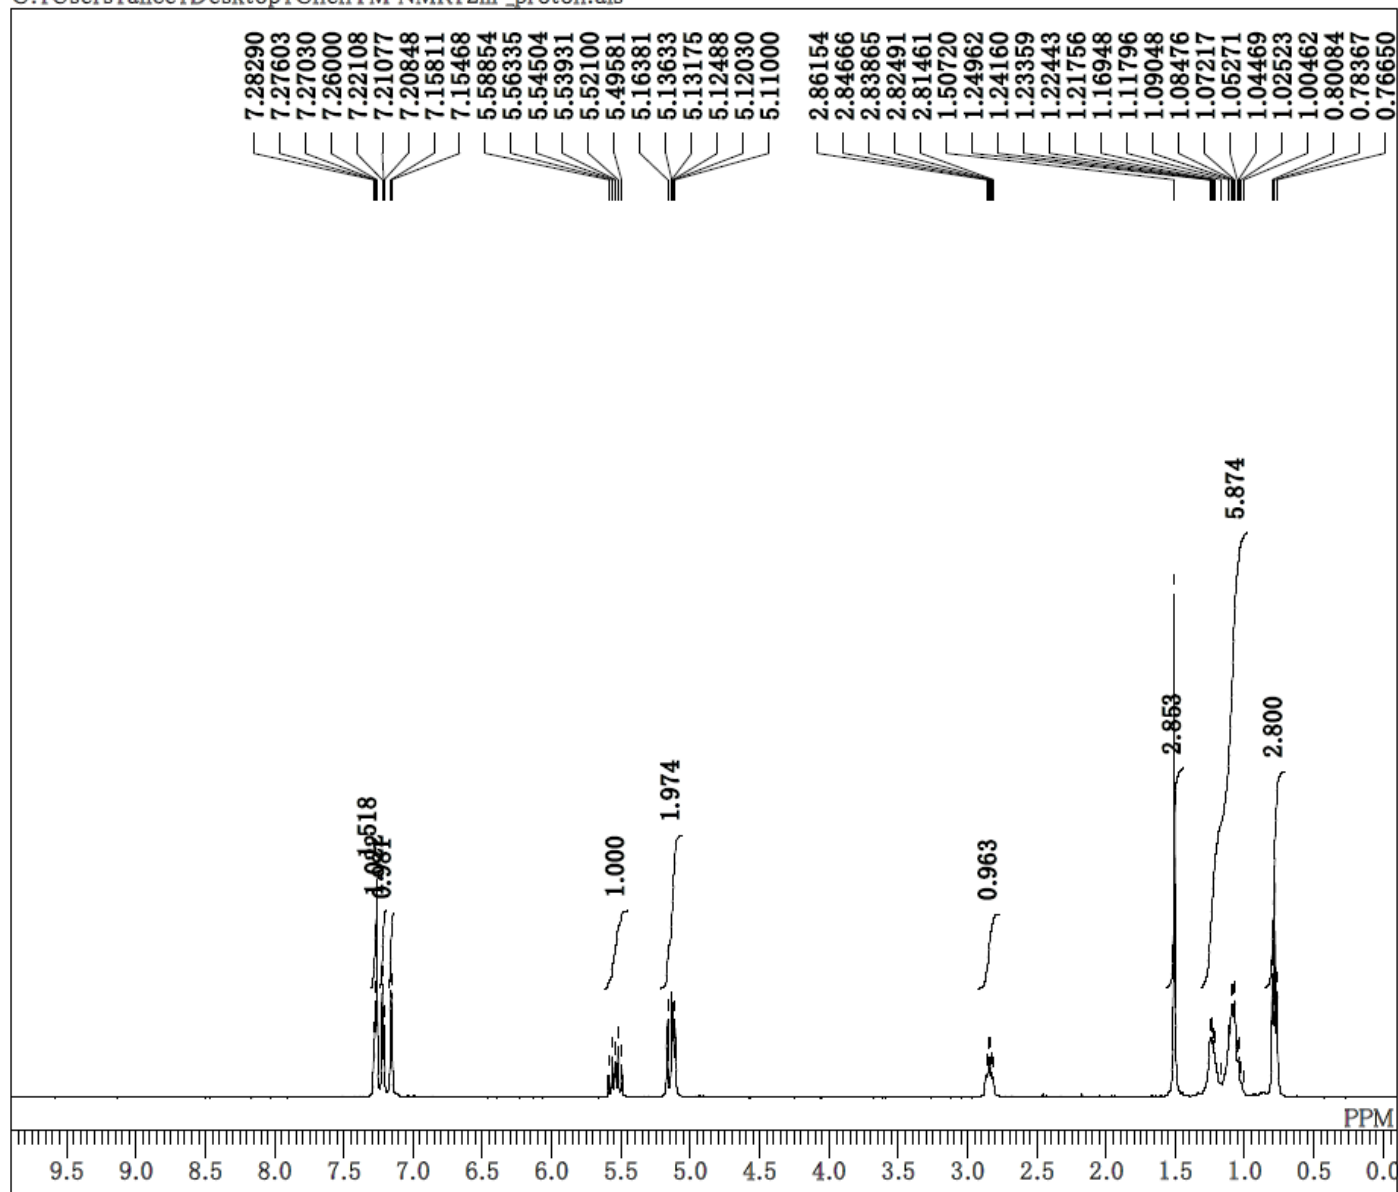

2m'\_proton.als  
 12-11-2019 20:47:55  
 1H  
 proton.jpg  
 391.78 MHz  
 8.51 KHz  
 3.34 Hz  
 13107  
 5878.90 Hz  
 8  
 2.2295 sec  
 6.0000 sec  
 5.17 usec  
 1H  
 20.7 c  
 CDCL3  
 7.26 ppm  
 1.20 Hz  
 42

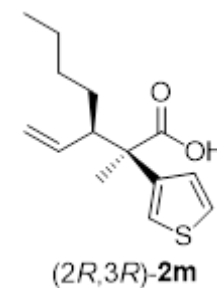

C:\Users\Valice\Desktop\ChenTM NMR\2m'\_carbon.als

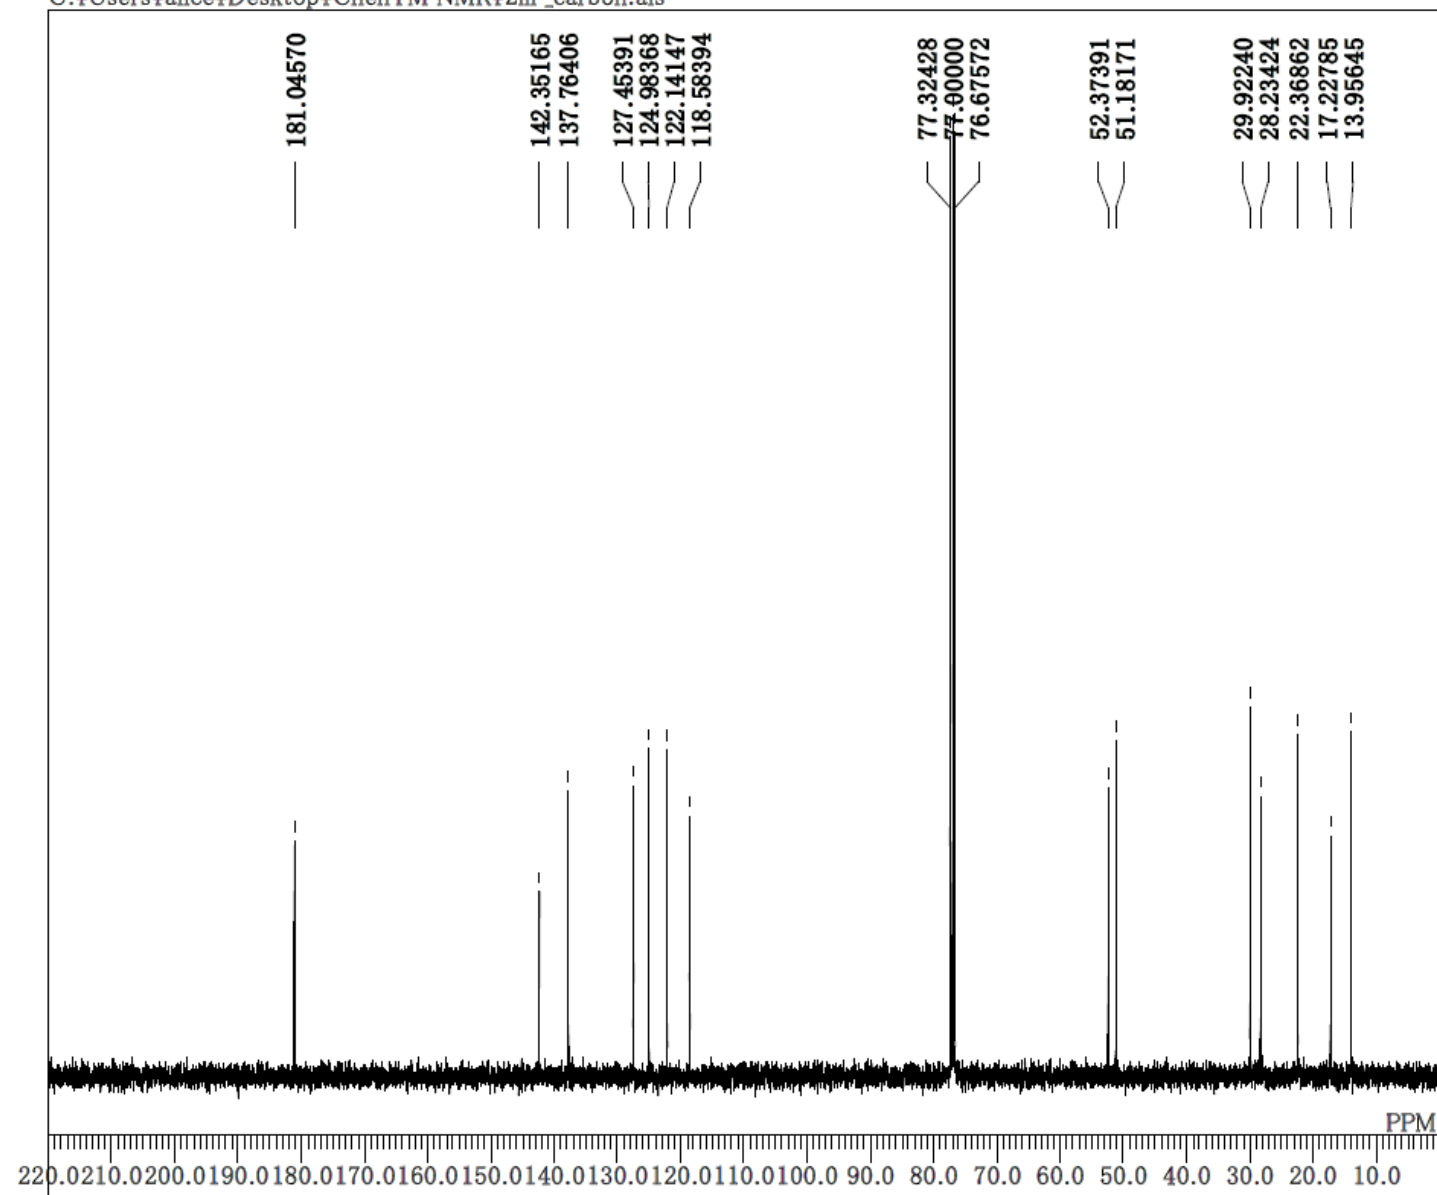

DFILE 2m'\_carbon.als  
 COMNT  
 DATIM 12-11-2019 21:27:07  
 OBNUC 13C  
 EXMOD carbon.jpg  
 OBFRQ 98.52 MHz  
 OBSET 4.64 KHz  
 OBFIN 8.74 Hz  
 POINT 26214  
 FREQU 24630.54 Hz  
 SCANS 116  
 ACQTM 1.0643 sec  
 PD 2.0000 sec  
 PW1 3.12 usec  
 IRNUC 1H  
 CTEMP 20.8 c  
 SLVNT CDCL3  
 EXREF 77.00 ppm  
 BF 1.20 Hz  
 RGAIN 60

C:\Users\valice\Desktop\ChenTM NMR\2n\_proton.als

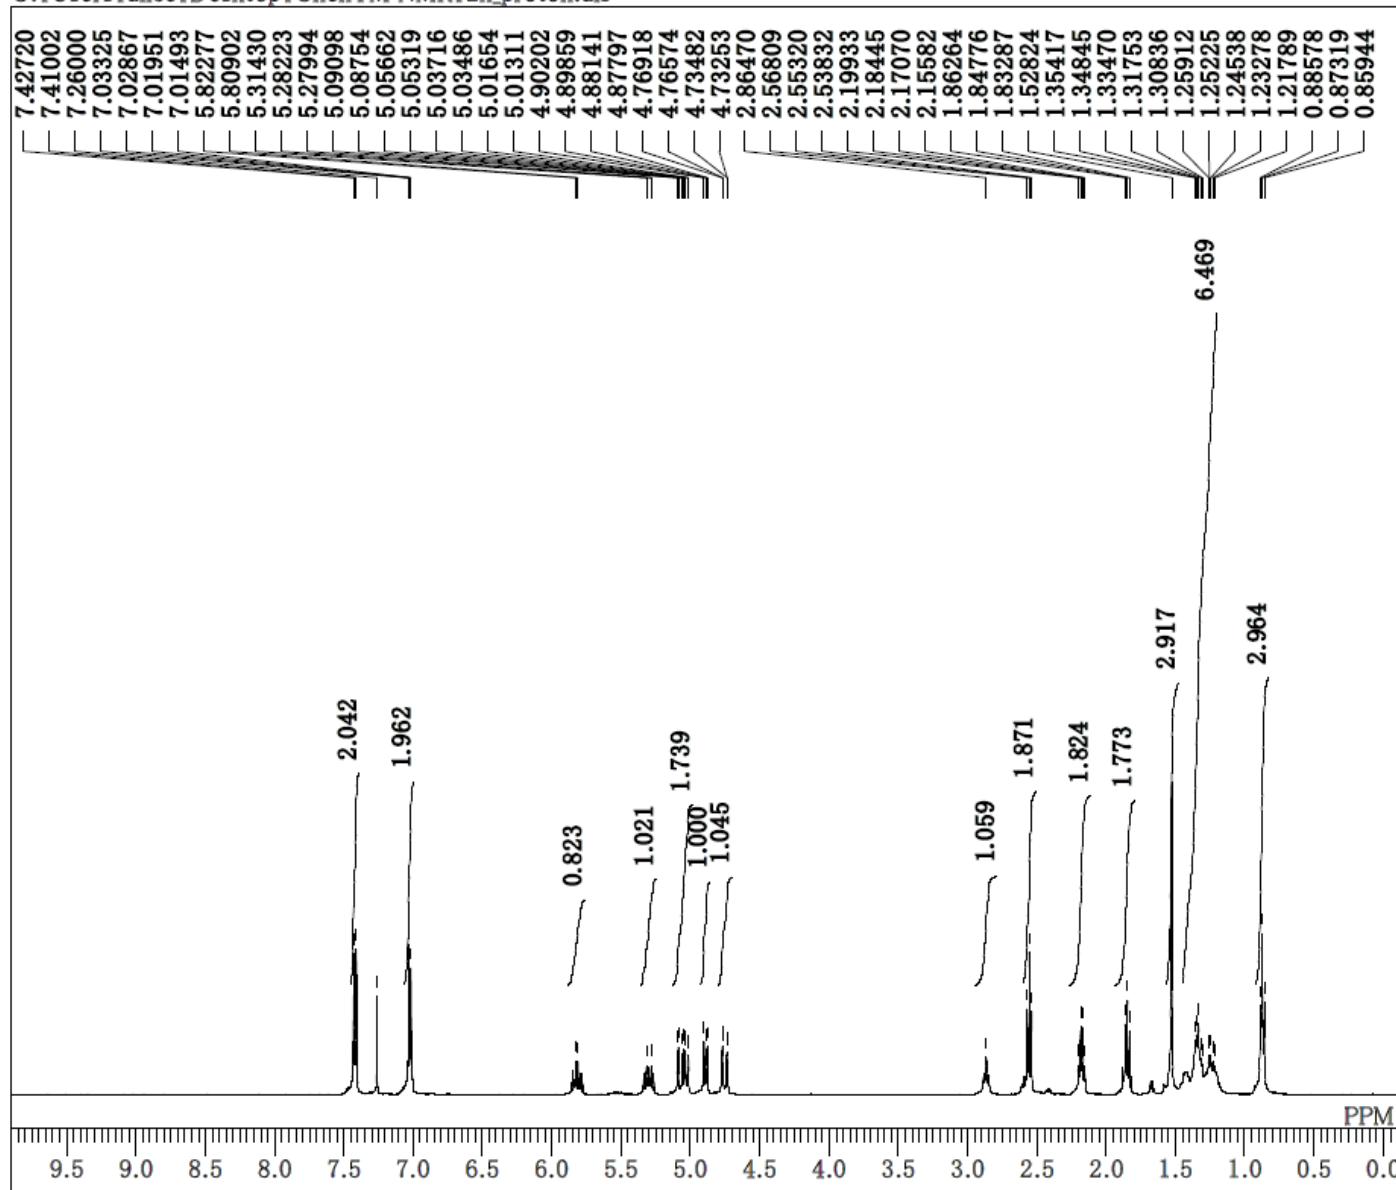

DFILE 2n\_proton.als  
 COMNT  
 DATIM 2019-12-24 20:56:28  
 OBNUC <sup>1</sup>H  
 EXMOD proton.jxp  
 OBFRQ 500.16 MHz  
 OBSET 2.41 KHz  
 OBFIN 6.01 Hz  
 POINT 13107  
 FREQU 7507.51 Hz  
 SCANS 8  
 ACQTM 1.7459 sec  
 PD 2.0000 sec  
 PW1 5.55 usec  
 IRNUC <sup>1</sup>H  
 CTEMP 21.2 c  
 SLVNT CDCL<sub>3</sub>  
 EXREF 7.26 ppm  
 BF 0.12 Hz  
 RGAIN 40

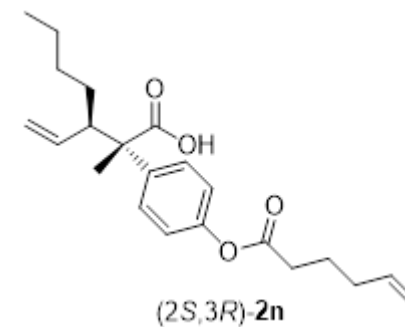

C:\Users\alice\Desktop\ChenTM NMR\2n\_carbon.als

DFILE 2n\_carbon.als  
 COMNT  
 DATIM 2019-12-24 21:07:45  
 OBNUC 13C  
 EXMOD carbon.jpg  
 OBFRQ 125.77 MHz  
 OBSET 7.87 KHz  
 OBFIN 4.21 Hz  
 POINT 26214  
 FREQU 31446.54 Hz  
 SCANS 165  
 ACQTM 0.8336 sec  
 PD 2.0000 sec  
 PW1 3.40 usec  
 IRNUC 1H  
 CTEMP 21.5 c  
 SLVNT CDCL3  
 EXREF 77.00 ppm  
 BF 0.12 Hz  
 RGAIN 60

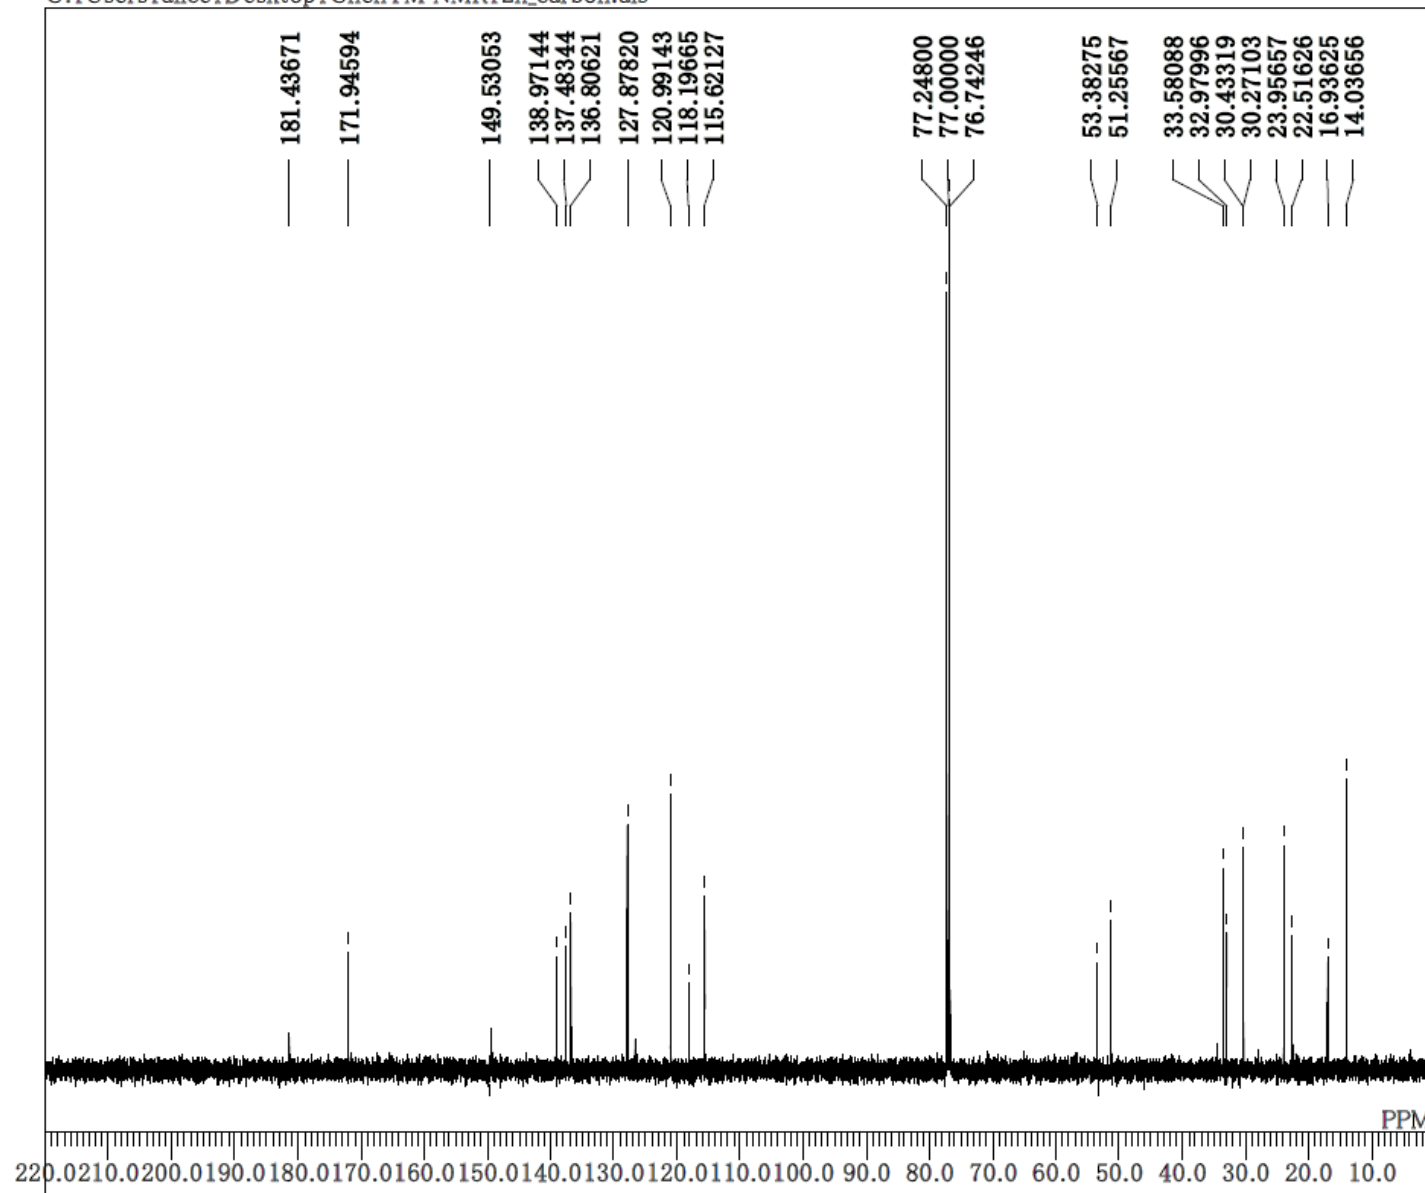

C:\Users\Valice\Desktop\ChenTM NMR\2n'\_proton.als

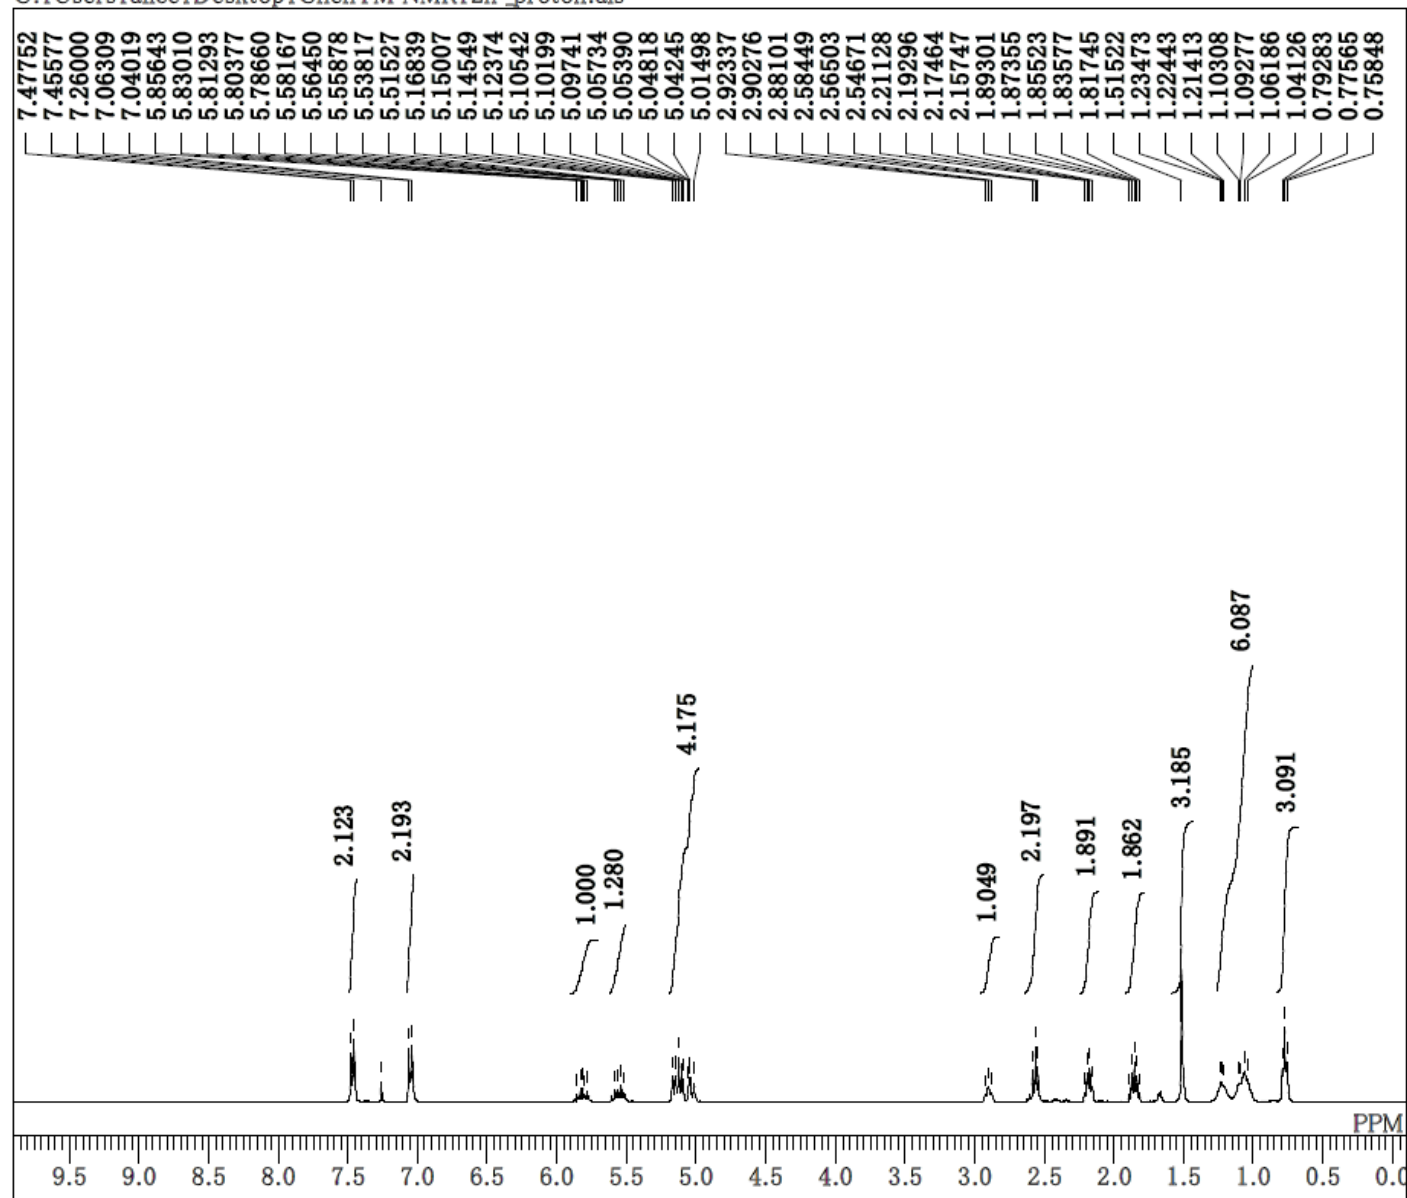

DFILE 2n'\_proton.als  
 COMNT  
 DATIM 04-04-2020 21:50:10  
 OBNUC 1H  
 EXMOD proton.jxp  
 OBFRQ 391.78 MHz  
 OBSET 8.51 KHz  
 OBFIN 3.34 Hz  
 POINT 13107  
 FREQU 5878.90 Hz  
 SCANS 8  
 ACQTM 2.2295 sec  
 PD 6.0000 sec  
 PW1 5.17 usec  
 IRNUC 1H  
 CTEMP 20.3 c  
 SLVNT CDCL3  
 EXREF 7.26 ppm  
 BF 0.72 Hz  
 RGAIN 34

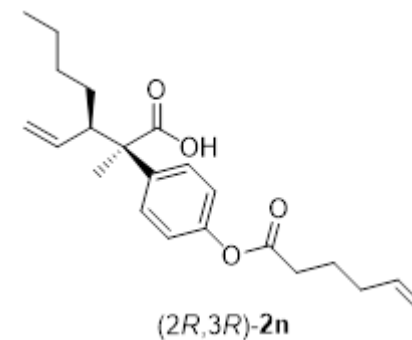

C:\Users\Valice\Desktop\ChenTM NMR\2n'\_carbon.als

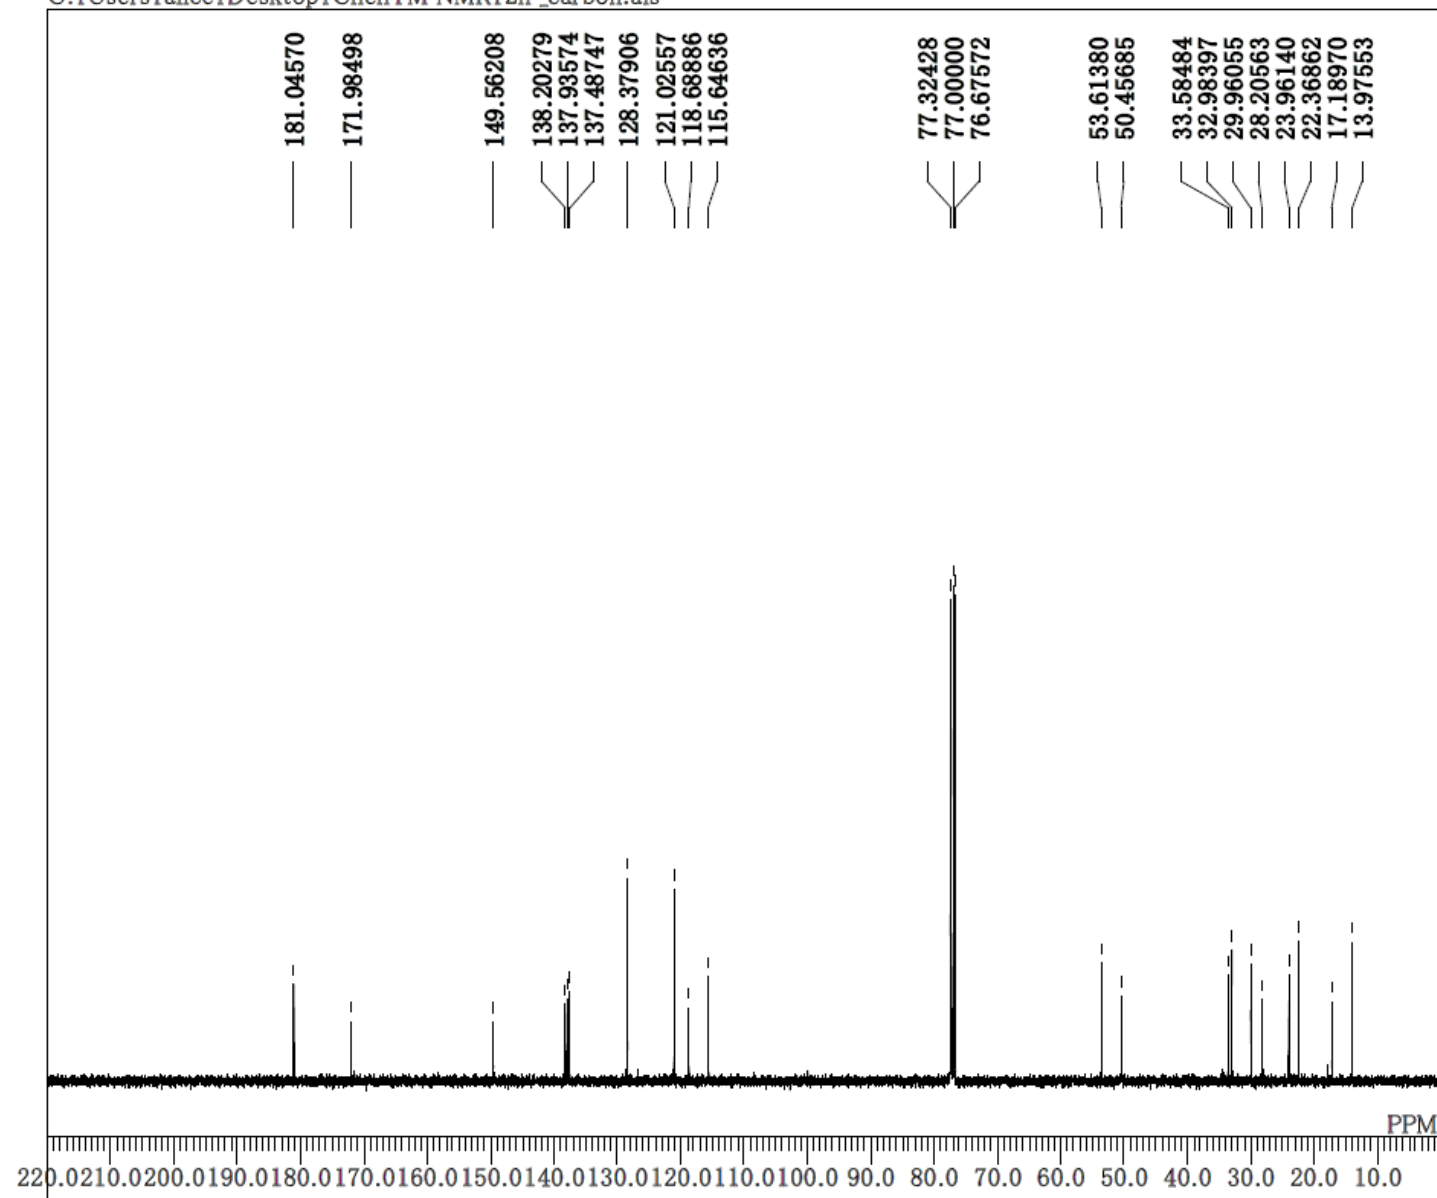

DFILE 2n'\_carbon.als  
 COMNT  
 DATIM 04-04-2020 21:52:11  
 OBNUC 13C  
 EXMOD carbon.jpg  
 OBFRQ 98.52 MHz  
 OBSET 4.64 KHz  
 OBFIN 8.74 Hz  
 POINT 26214  
 FREQU 24630.54 Hz  
 SCANS 247  
 ACQTM 1.0643 sec  
 PD 2.0000 sec  
 PW1 3.12 usec  
 IRNUC 1H  
 CTEMP 20.5 c  
 SLVNT CDCL3  
 EXREF 77.00 ppm  
 BF 0.72 Hz  
 RGAIN 60

C:\Users\Valice\Desktop\ChenTM NMR\2o\_proton.als

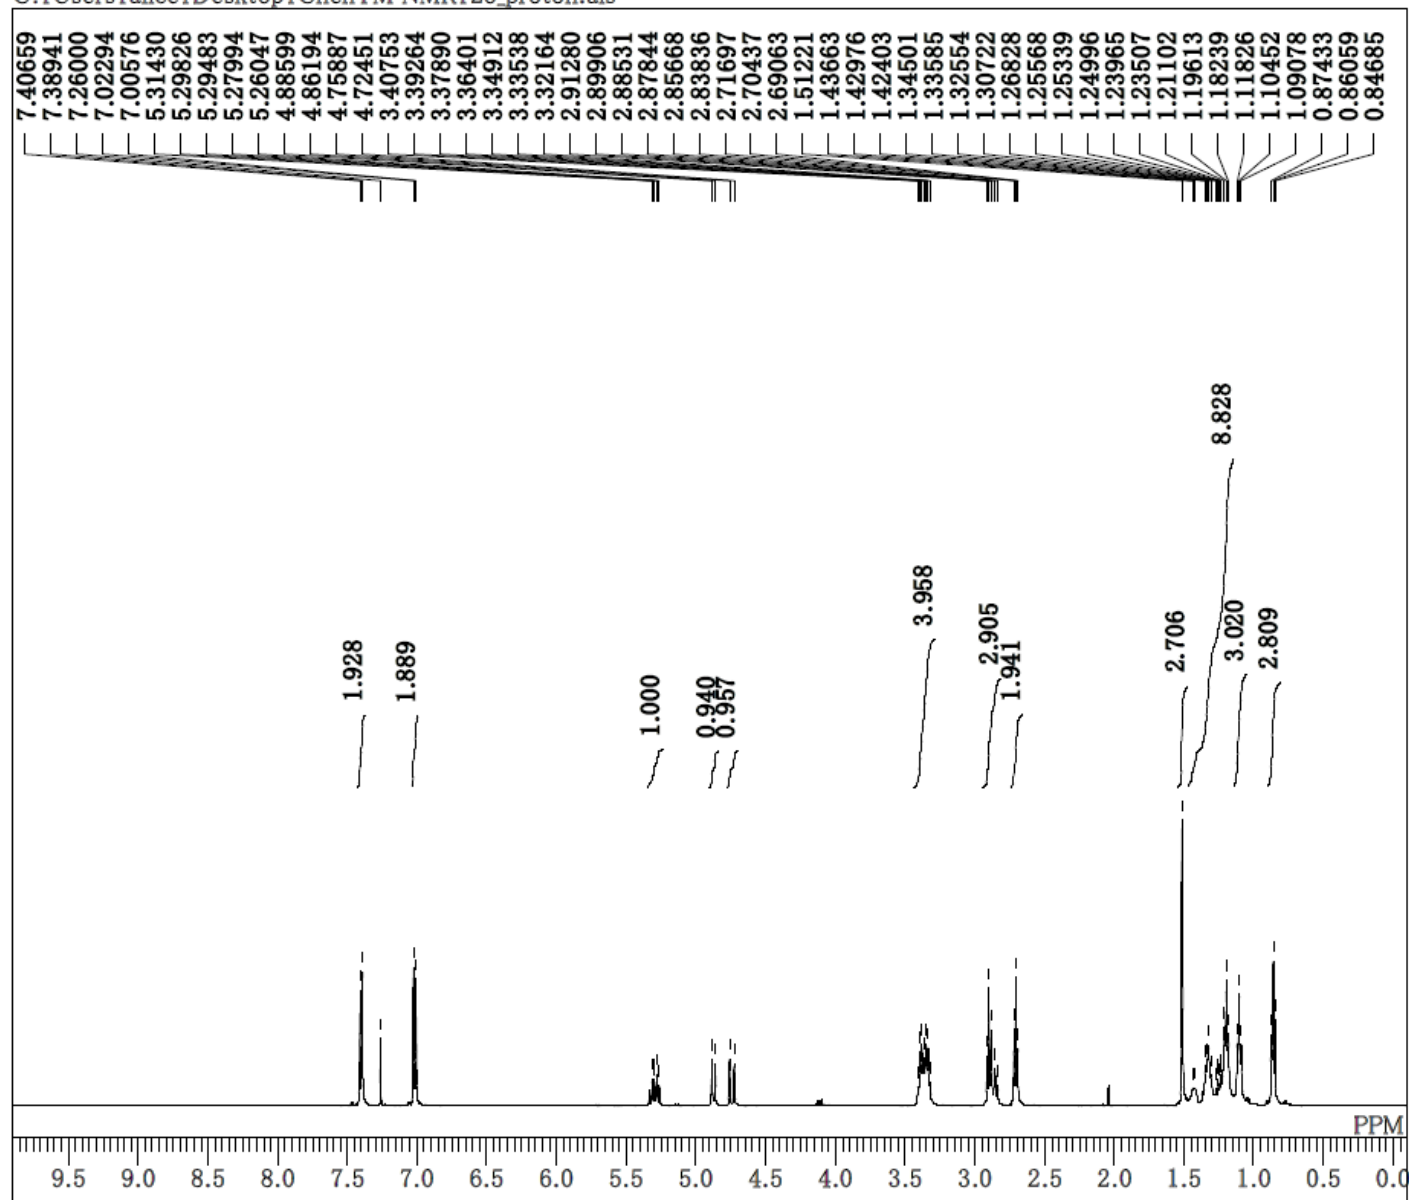

DFILE  
 COMNT  
 DATIM  
 OBNUC  
 EXMOD  
 OBFRQ  
 OBSET  
 OBFIN  
 POINT  
 FREQU  
 SCANS  
 ACQTM  
 PD  
 PW1  
 IRNUC  
 CTEMP  
 SLVNT  
 EXREF  
 BF  
 RGAIN

2o\_proton.als  
 2019-12-10 12:10:39  
 1H  
 proton.jxp  
 500.16 MHz  
 2.41 KHz  
 6.01 Hz  
 13107  
 7507.51 Hz  
 8  
 1.7459 sec  
 6.0000 sec  
 5.55 usec  
 1H  
 21.3 c  
 CDCL3  
 7.26 ppm  
 0.12 Hz  
 40

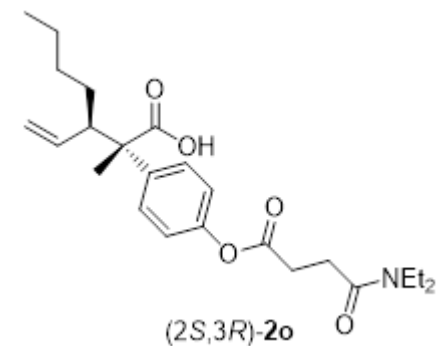

C:\Users\Valice\Desktop\ChenTM NMR\2o\_carbon.als

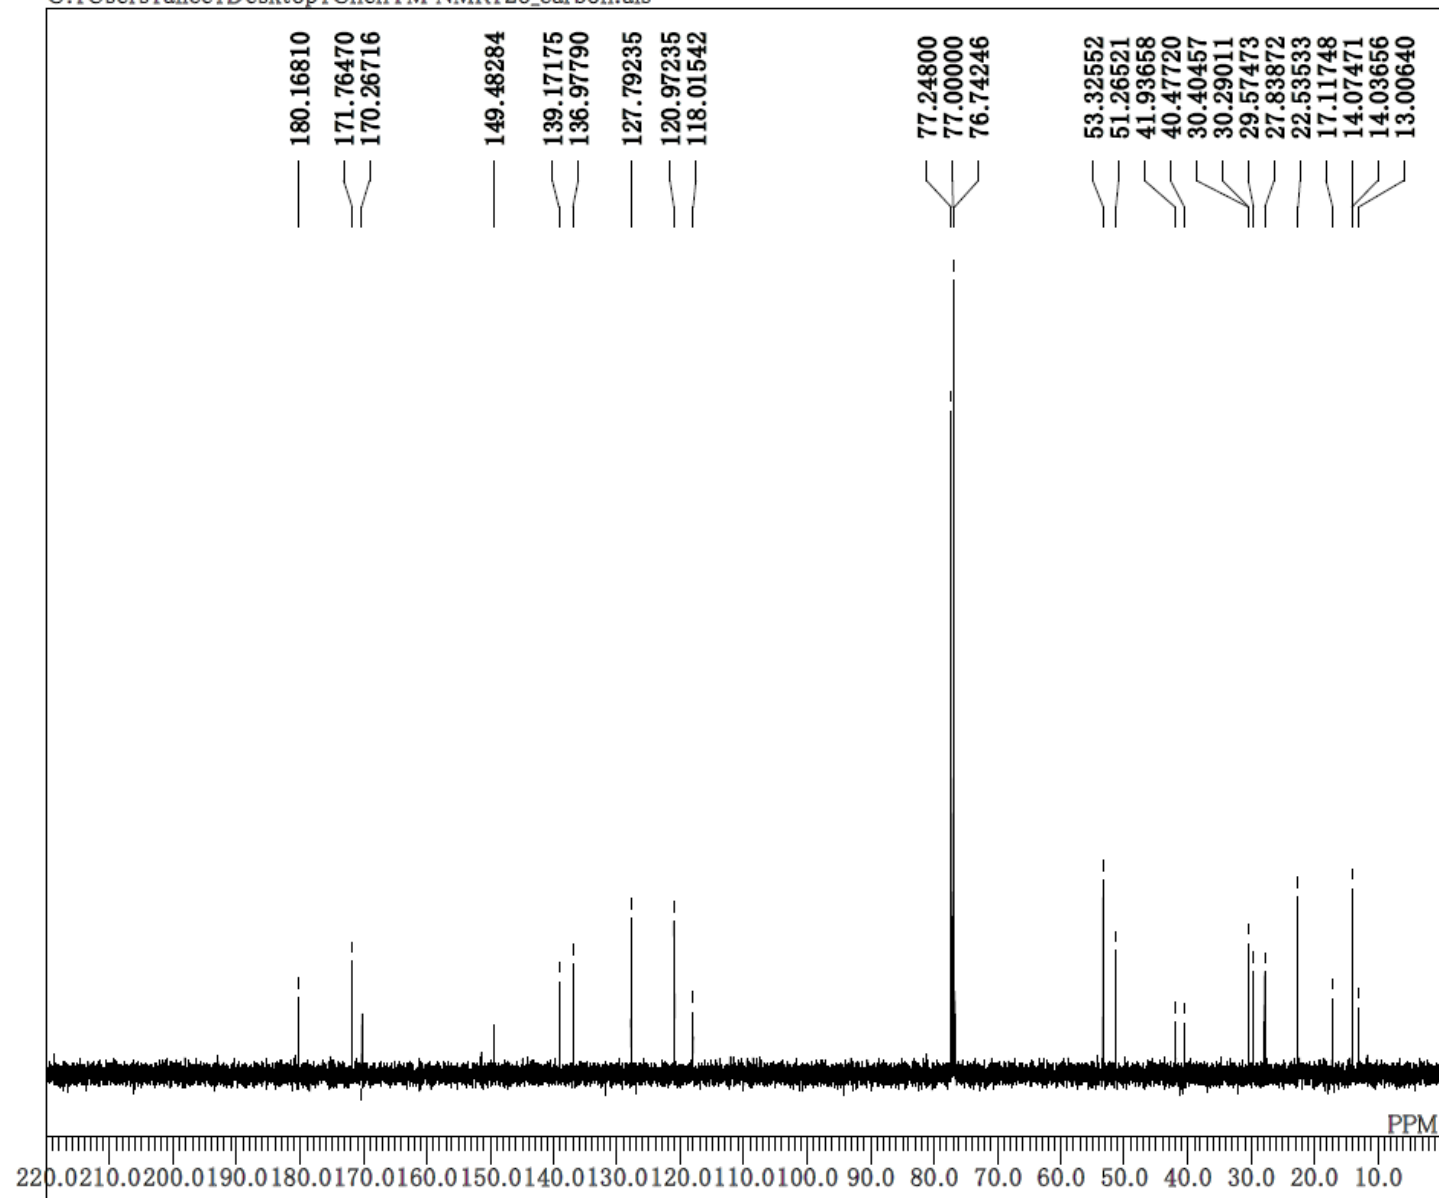

DFILE 2o\_carbon.als  
 COMNT  
 DATIM 2019-12-10 12:16:11  
 OBNUC 13C  
 EXMOD carbon.jpg  
 OBFRQ 125.77 MHz  
 OBSET 7.87 KHz  
 OBFIN 4.21 Hz  
 POINT 26214  
 FREQU 31446.54 Hz  
 SCANS 133  
 ACQTM 0.8336 sec  
 PD 2.0000 sec  
 PW1 3.40 usec  
 IRNUC 1H  
 CTEMP 21.7 c  
 SLVNT CDCL3  
 EXREF 77.00 ppm  
 BF 0.12 Hz  
 RGAIN 60



C:\Users\Valice\Desktop\ChenTM NMR\2o'\_proton.als

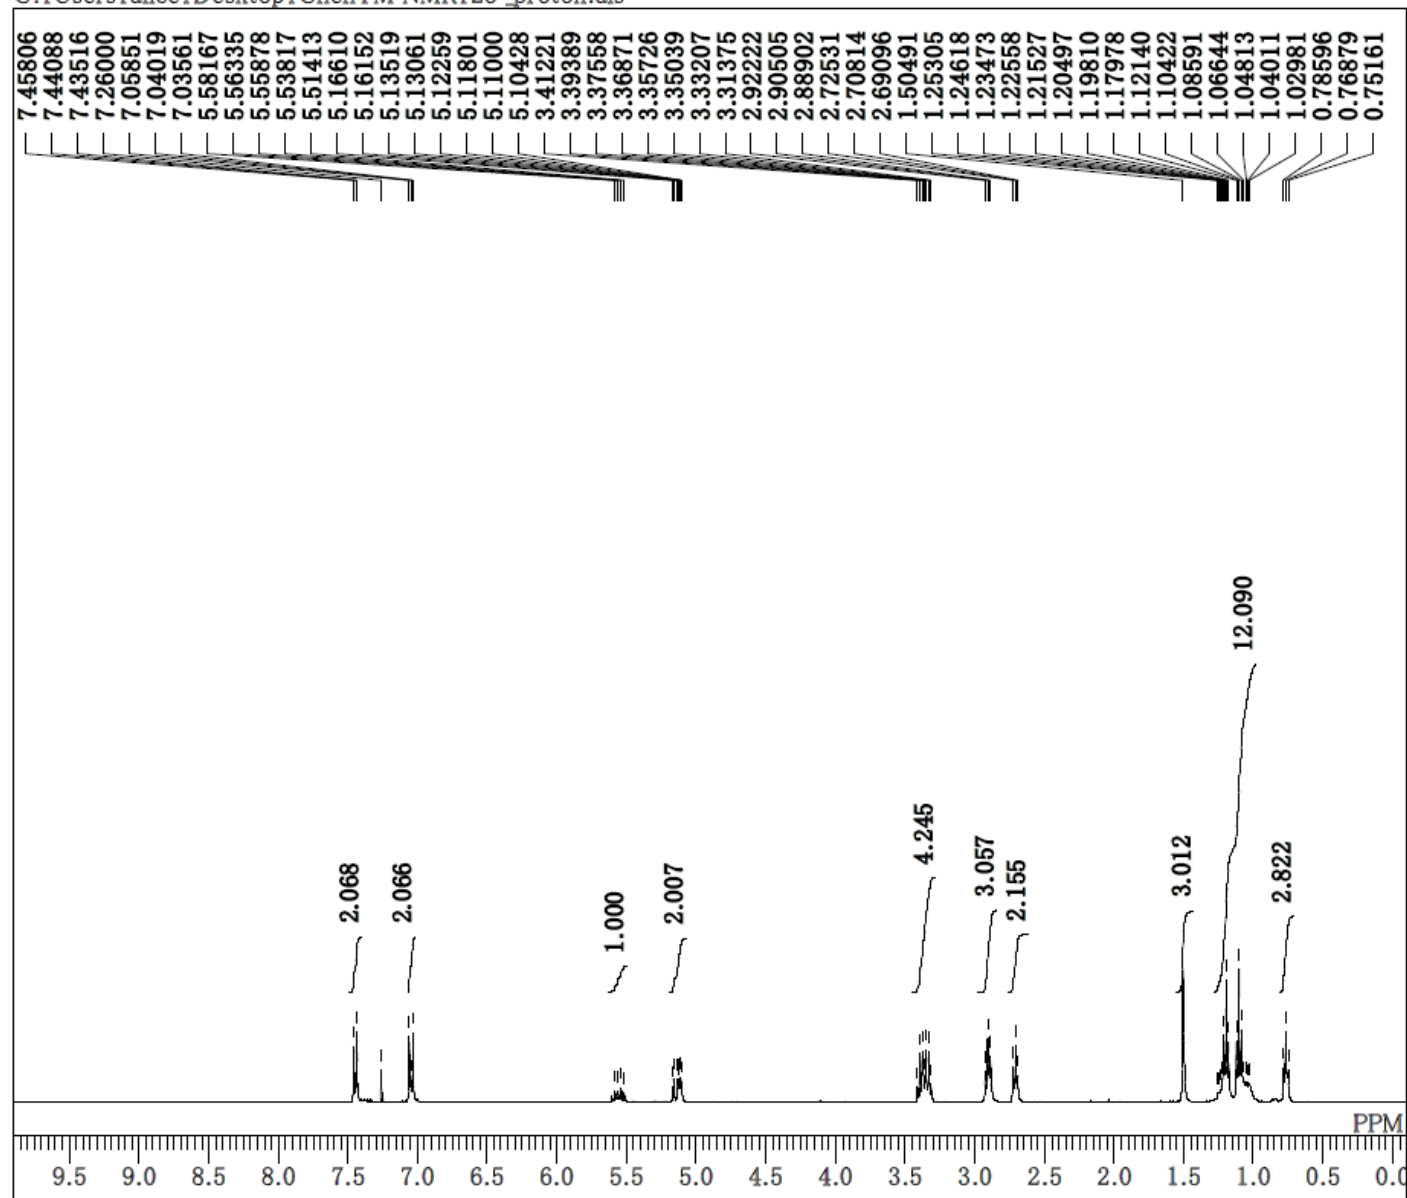

DFILE 2o'\_proton.als  
 COMNT  
 DATIM 06-04-2020 13:32:40  
 OBNUC 1H  
 EXMOD proton.jxp  
 OBFRQ 391.78 MHz  
 OBSET 8.51 KHz  
 OBFIN 3.34 Hz  
 POINT 13107  
 FREQU 5878.90 Hz  
 SCANS 13  
 ACQTM 2.2295 sec  
 PD 6.0000 sec  
 PW1 5.17 usec  
 IRNUC 1H  
 CTEMP 20.2 c  
 SLVNT CDCL3  
 EXREF 7.26 ppm  
 BF 0.12 Hz  
 RGAIN 32

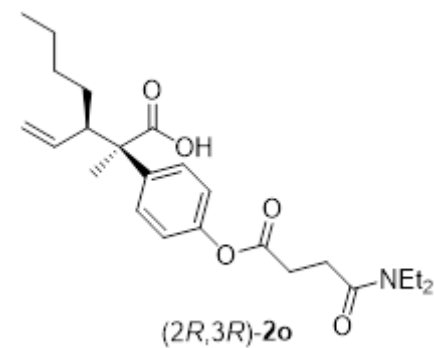

C:\Users\Valice\Desktop\ChenTM NMR\2o'\_carbon.als

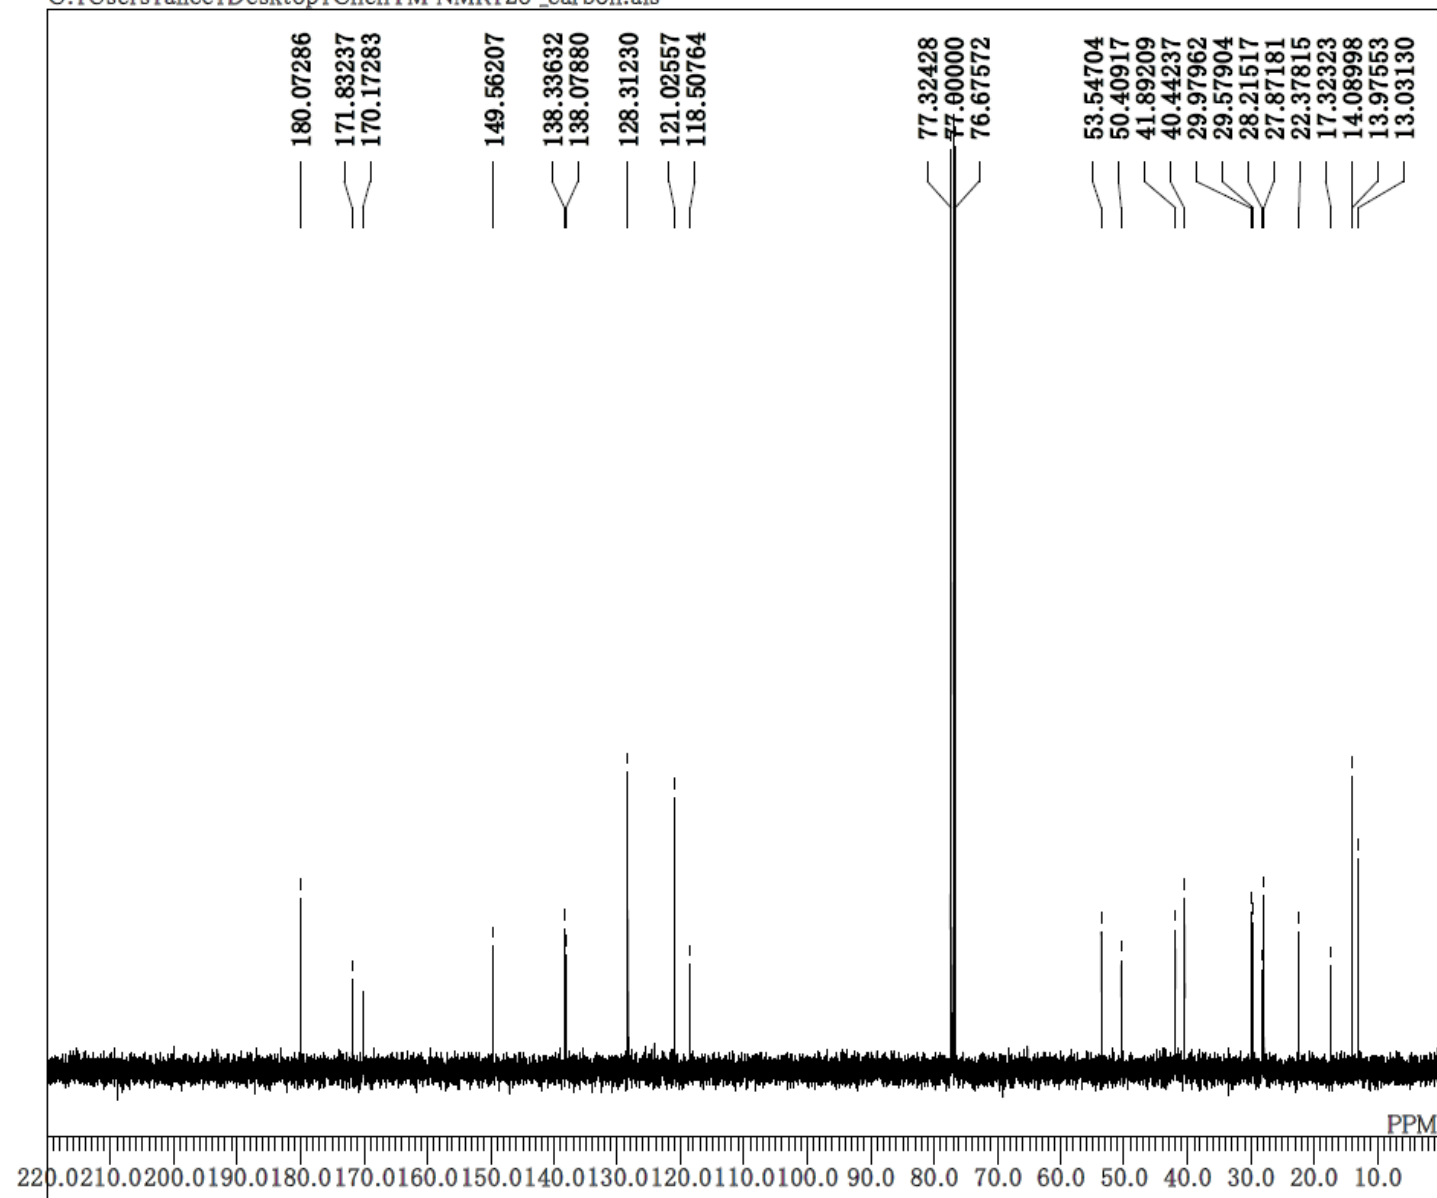

DFILE 2o'\_carbon.als  
 COMNT  
 DATIM 06-04-2020 13:35:17  
 OBNUC 13C  
 EXMOD carbon.jpg  
 OBFRQ 98.52 MHz  
 OBSET 4.64 KHz  
 OBFIN 8.74 Hz  
 POINT 26214  
 FREQU 24630.54 Hz  
 SCANS 162  
 ACQTM 1.0643 sec  
 PD 2.0000 sec  
 PW1 3.12 usec  
 IRNUC 1H  
 CTEMP 20.5 c  
 SLVNT CDCL3  
 EXREF 77.00 ppm  
 BF 0.12 Hz  
 RGAIN 60

C:\Users\valice\Desktop\ChenTM NMR\2p\_proton.als

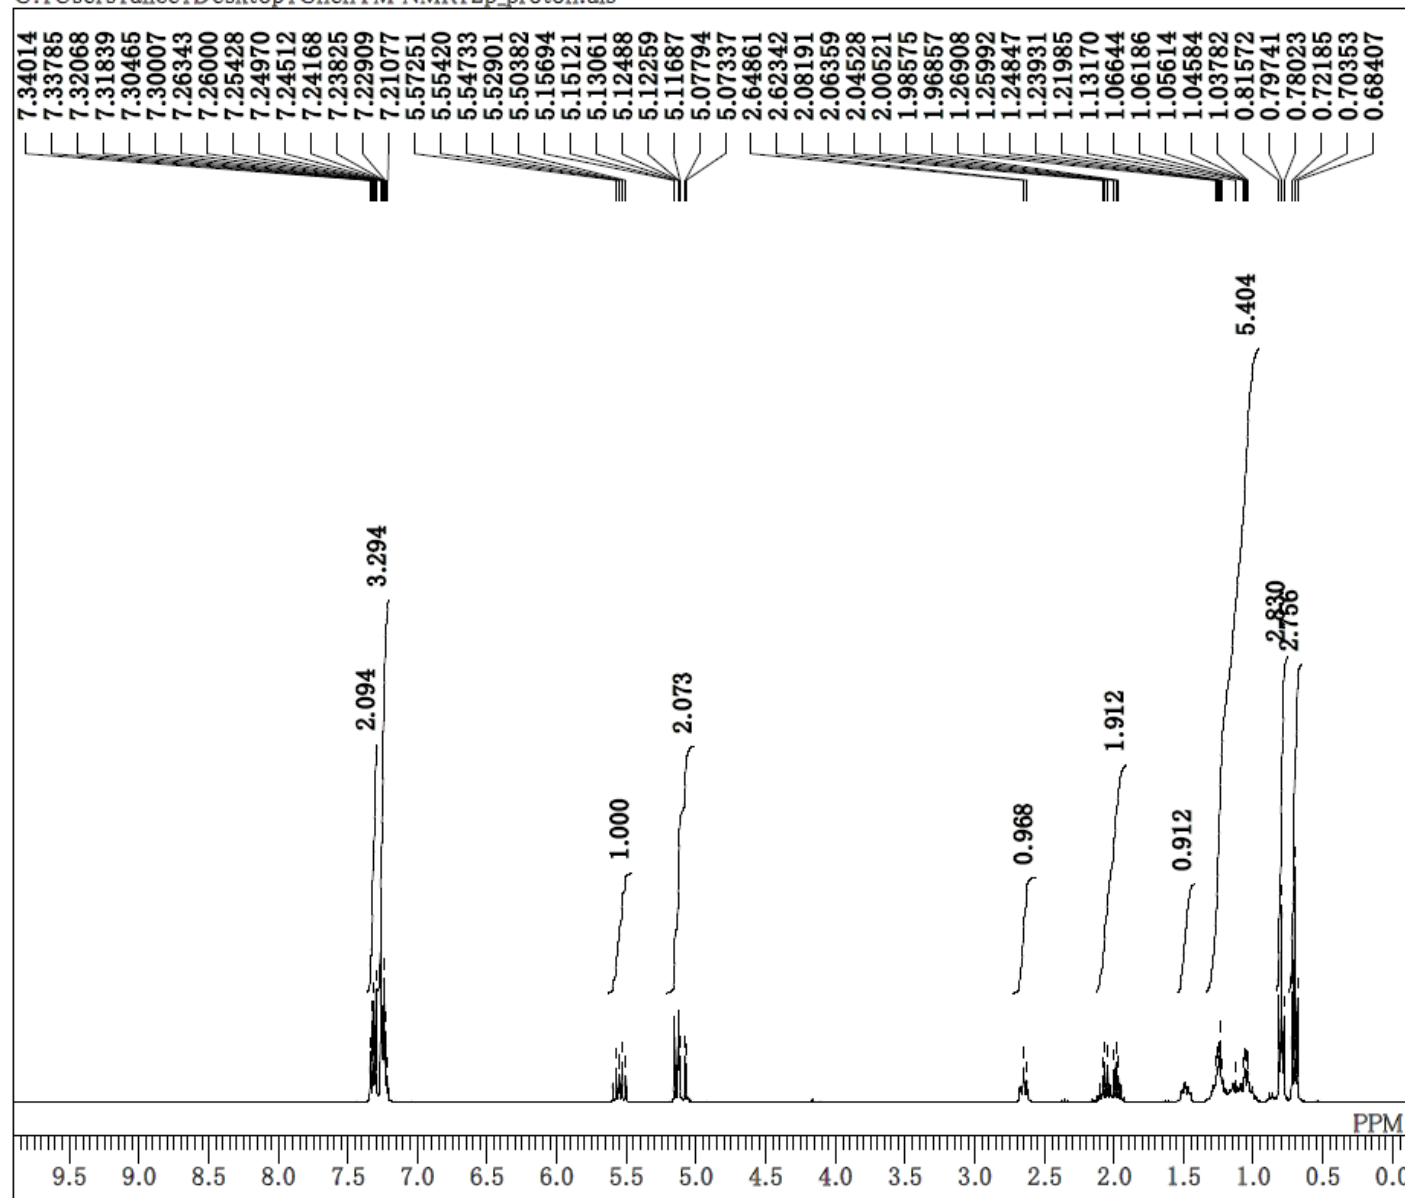

DFILE 2p\_proton.als  
 COMNT  
 DATIM 14-03-2020 17:31:34  
 OBNUC 1H  
 EXMOD proton.jxp  
 OBFRQ 391.78 MHz  
 OBSET 8.51 KHz  
 OBFIN 3.34 Hz  
 POINT 13107  
 FREQU 5878.90 Hz  
 SCANS 8  
 ACQTM 2.2295 sec  
 PD 6.0000 sec  
 PW1 5.17 usec  
 IRNUC 1H  
 CTEMP 19.8 c  
 SLVNT CDCL3  
 EXREF 7.26 ppm  
 BF 0.12 Hz  
 RGAIN 32

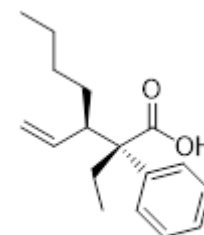

(2S,3R)-2p

C:\Users\alice\Desktop\ChenTM NMR\2p\_carbon.als

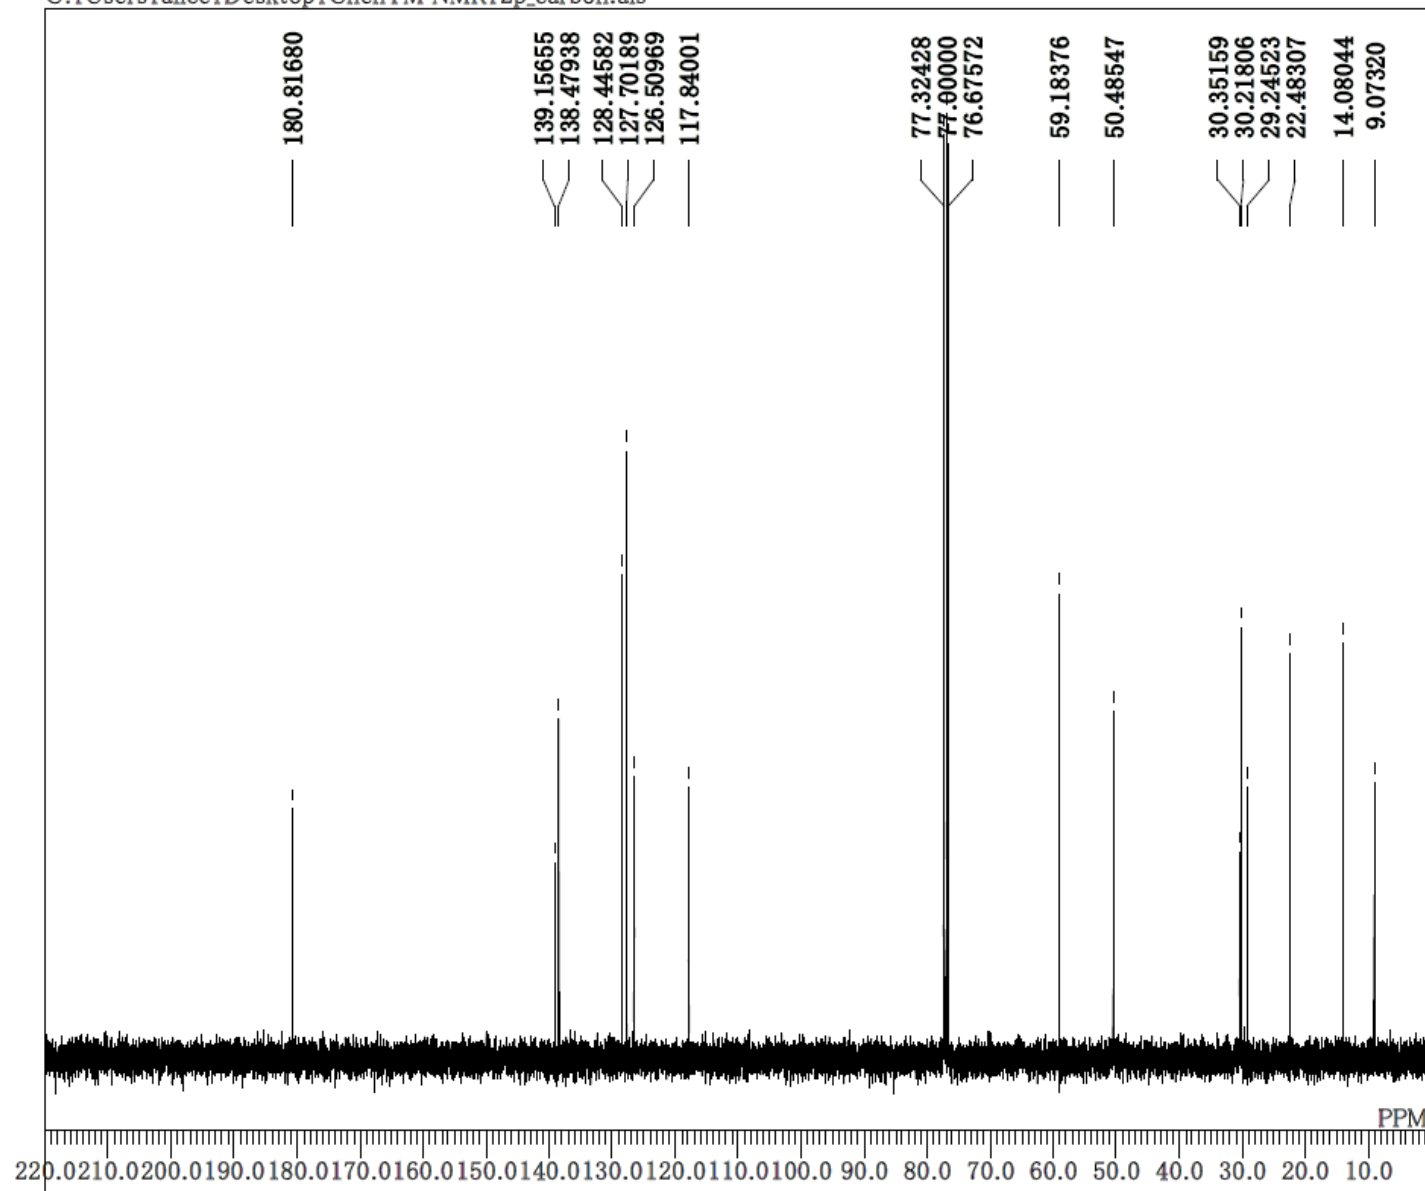

DFILE 2p\_carbon.als  
COMNT  
DATIM 14-03-2020 17:33:56  
OBNUC <sup>13</sup>C  
EXMOD carbon.jpg  
OBFRQ 98.52 MHz  
OBSET 4.64 KHz  
OBFIN 8.74 Hz  
POINT 26214  
FREQU 24630.54 Hz  
SCANS 108  
ACQTM 1.0643 sec  
PD 2.0000 sec  
PW1 3.12 usec  
IRNUC <sup>1</sup>H  
CTEMP 20.1 c  
SLVNT CDCL<sub>3</sub>  
EXREF 77.00 ppm  
BF 0.12 Hz  
RGAIN 60

C:\Users\Valice\Desktop\ChenTM NMR\2p'\_proton.als

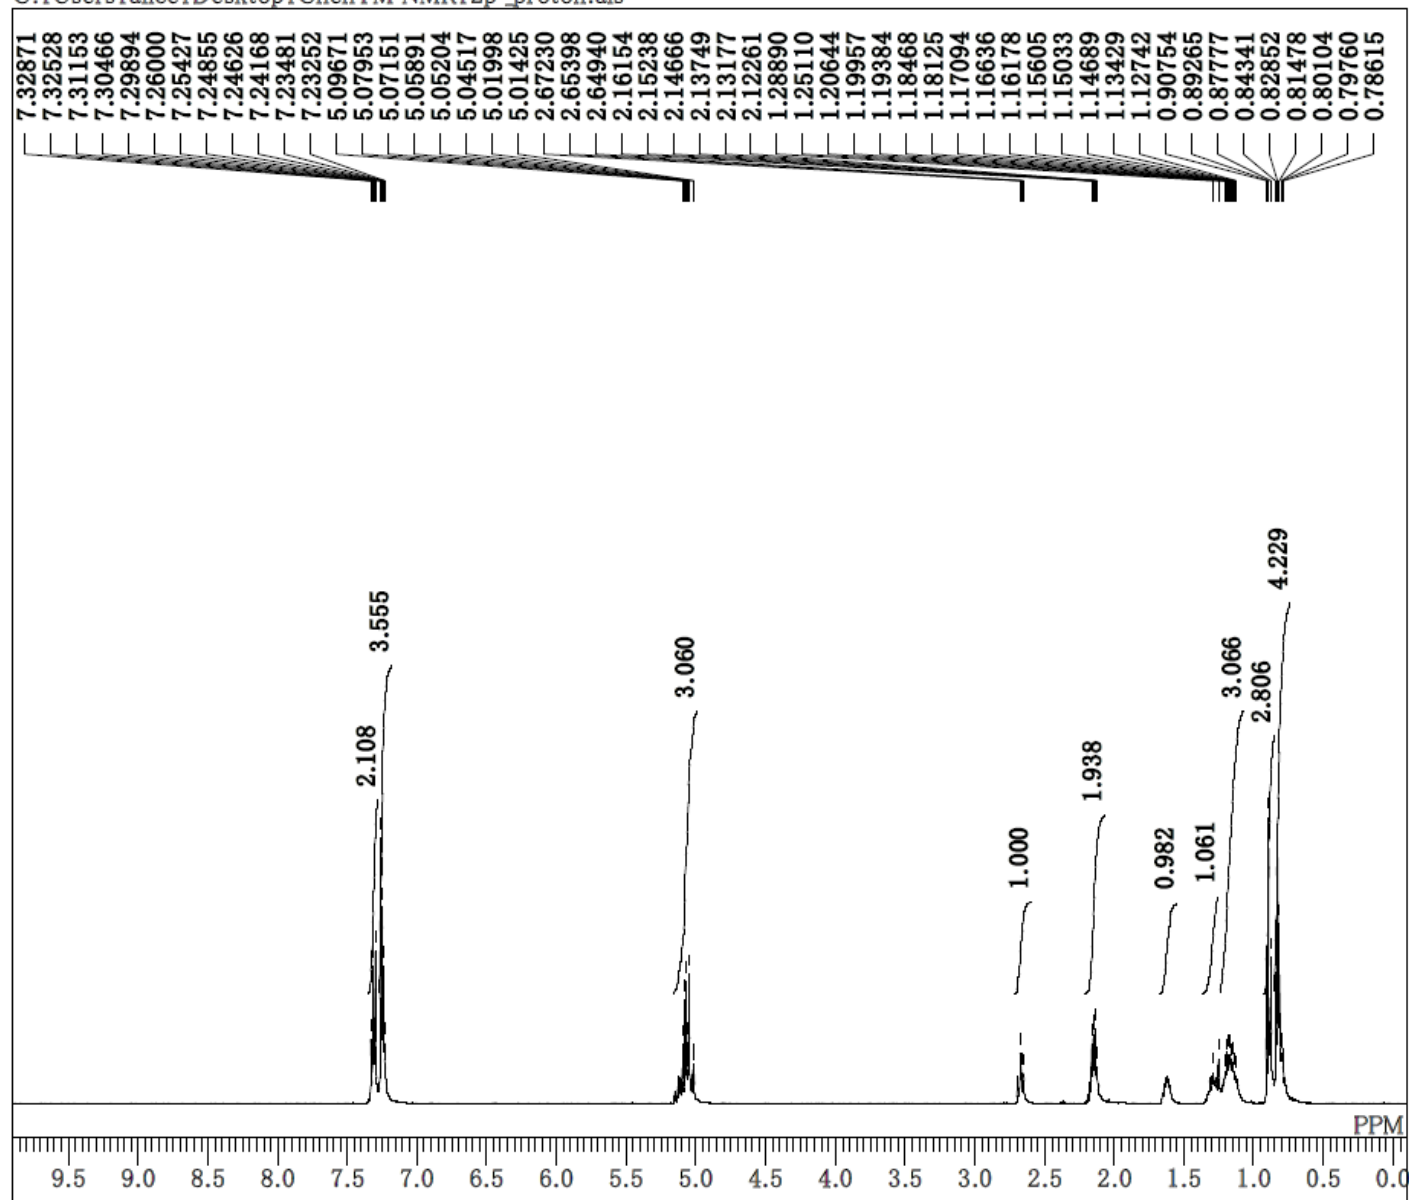

DFILE 2p'\_proton.als  
COMNT  
DATIM 2019-10-02 13:01:37  
OBNUC 1H  
EXMOD proton.jxp  
OBFRQ 500.16 MHz  
OBSET 2.41 KHz  
OBFIN 6.01 Hz  
POINT 13107  
FREQU 7507.51 Hz  
SCANS 8  
ACQTM 1.7459 sec  
PD 6.0000 sec  
PW1 5.55 usec  
IRNUC 1H  
CTEMP 21.7 c  
SLVNT CDCL3  
EXREF 7.26 ppm  
BF 0.12 Hz  
RGAIN 40

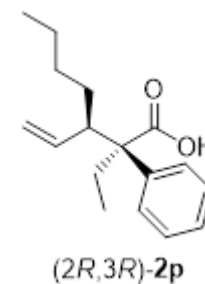

C:\Users\alice\Desktop\ChenTM NMR\2p'\_carbon.als

DFILE 2p'\_carbon.als  
 COMNT  
 DATIM 02-10-2019 12:05:17  
 OBNUC <sup>13</sup>C  
 EXMOD carbon.jpg  
 OBFRQ 98.52 MHz  
 OBSET 4.64 KHz  
 OBFIN 8.74 Hz  
 POINT 26214  
 FREQU 24630.54 Hz  
 SCANS 120  
 ACQTM 1.0643 sec  
 PD 2.0000 sec  
 PW1 3.12 usec  
 IRNUC <sup>1</sup>H  
 CTEMP 20.9 c  
 SLVNT CDCL<sub>3</sub>  
 EXREF 77.00 ppm  
 BF 0.12 Hz  
 RGAIN 60

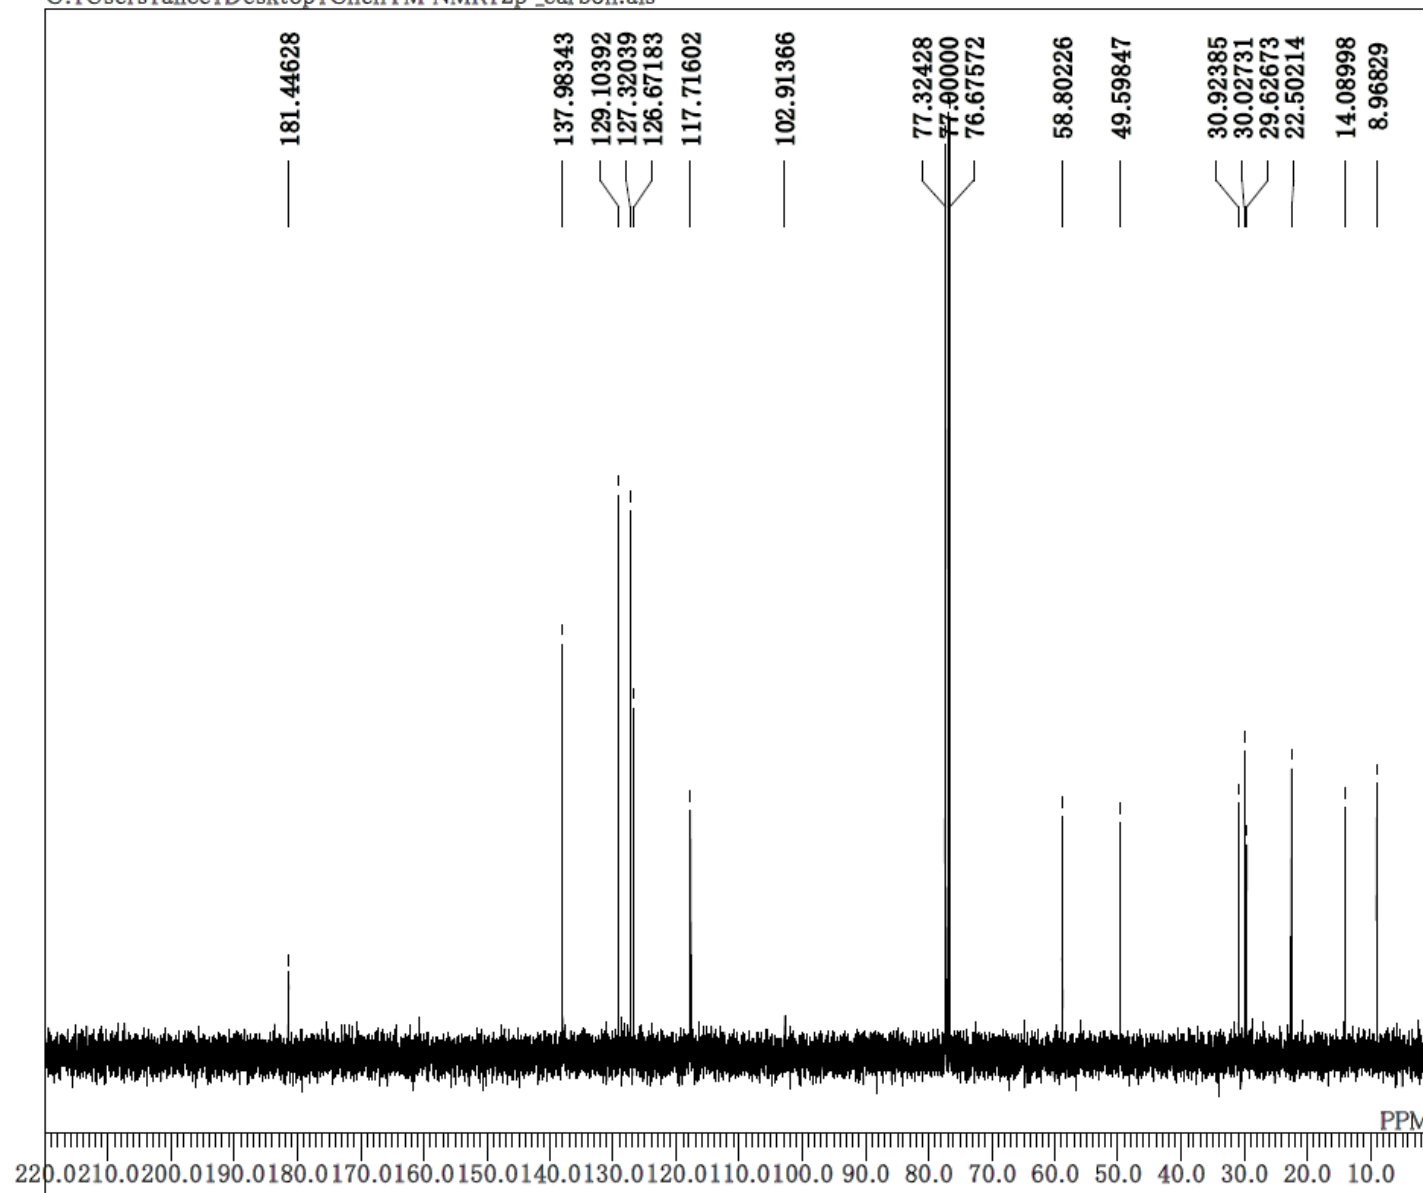

C:\Users\alice\Desktop\ChenTM NMR\2q\_proton.als

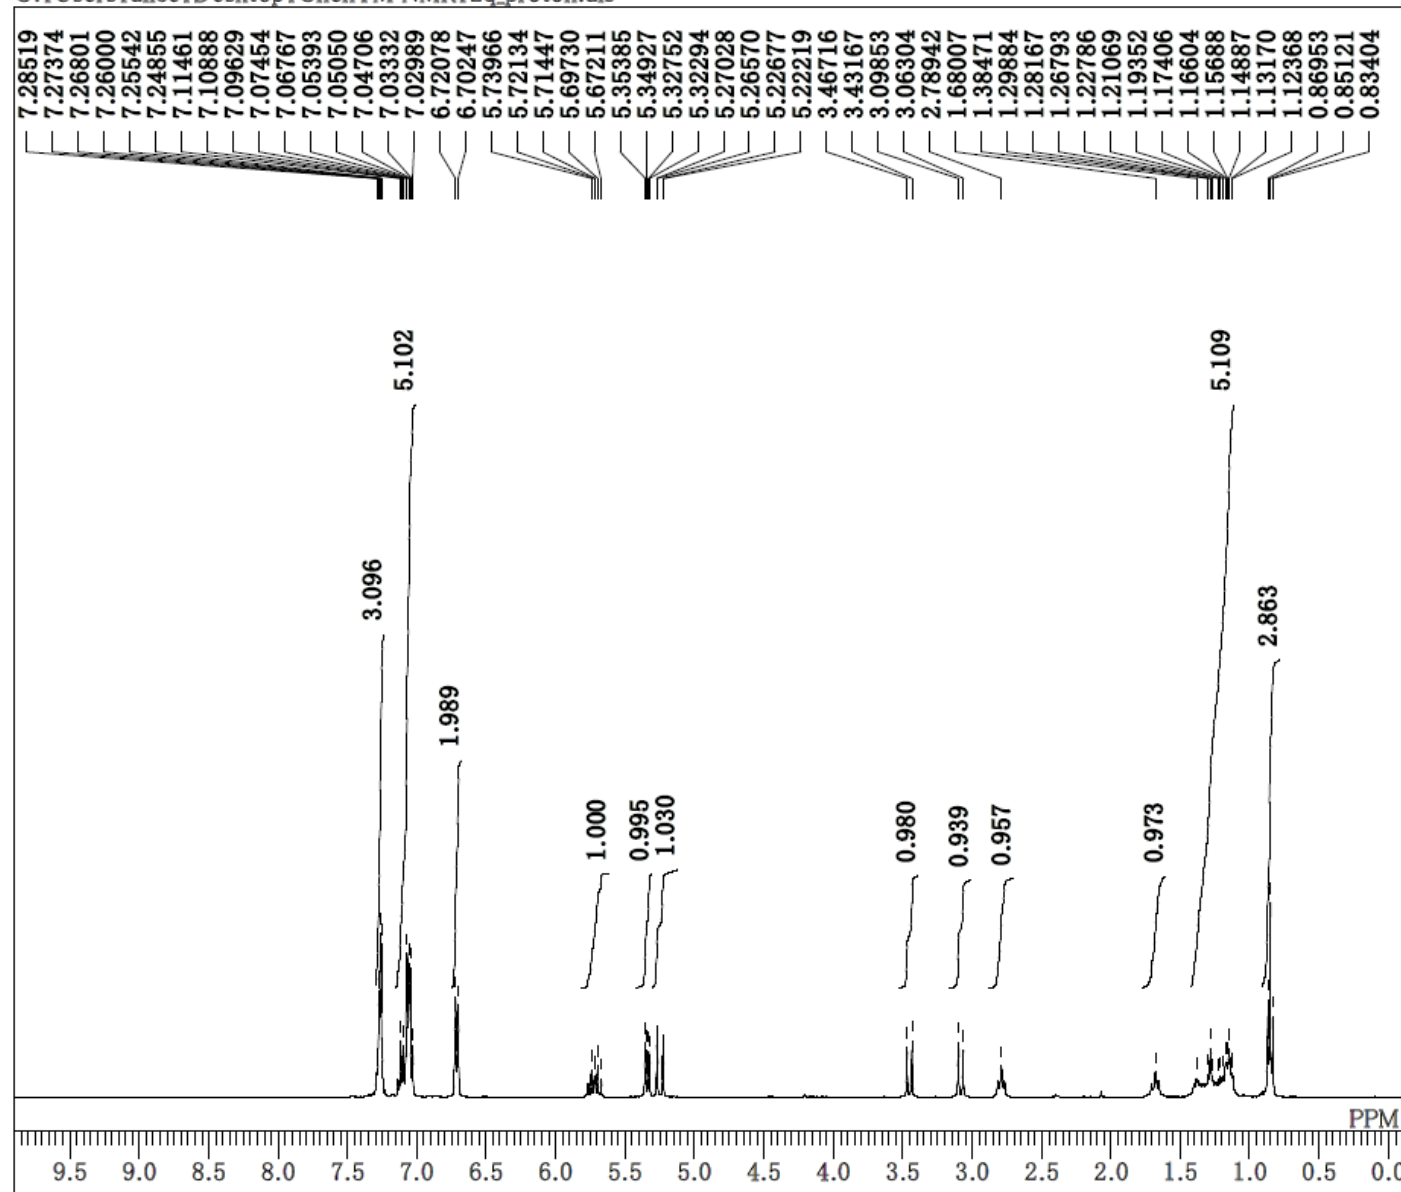

DFILE 2q\_proton.als  
 COMNT  
 DATIM 09-03-2020 14:16:54  
 OBNUC 1H  
 EXMOD proton.jxp  
 OBFRQ 391.78 MHz  
 OBSET 8.51 KHz  
 OBFIN 3.34 Hz  
 POINT 13107  
 FREQU 5878.90 Hz  
 SCANS 8  
 ACQTM 2.2295 sec  
 PD 6.0000 sec  
 PW1 5.17 usec  
 IRNUC 1H  
 CTEMP 20.2 c  
 SLVNT CDCL3  
 EXREF 7.26 ppm  
 BF 0.12 Hz  
 RGAIN 30

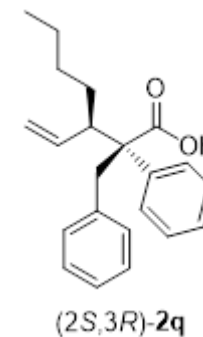

C:\Users\alice\Desktop\ChenTM NMR\2q\_carbon.als

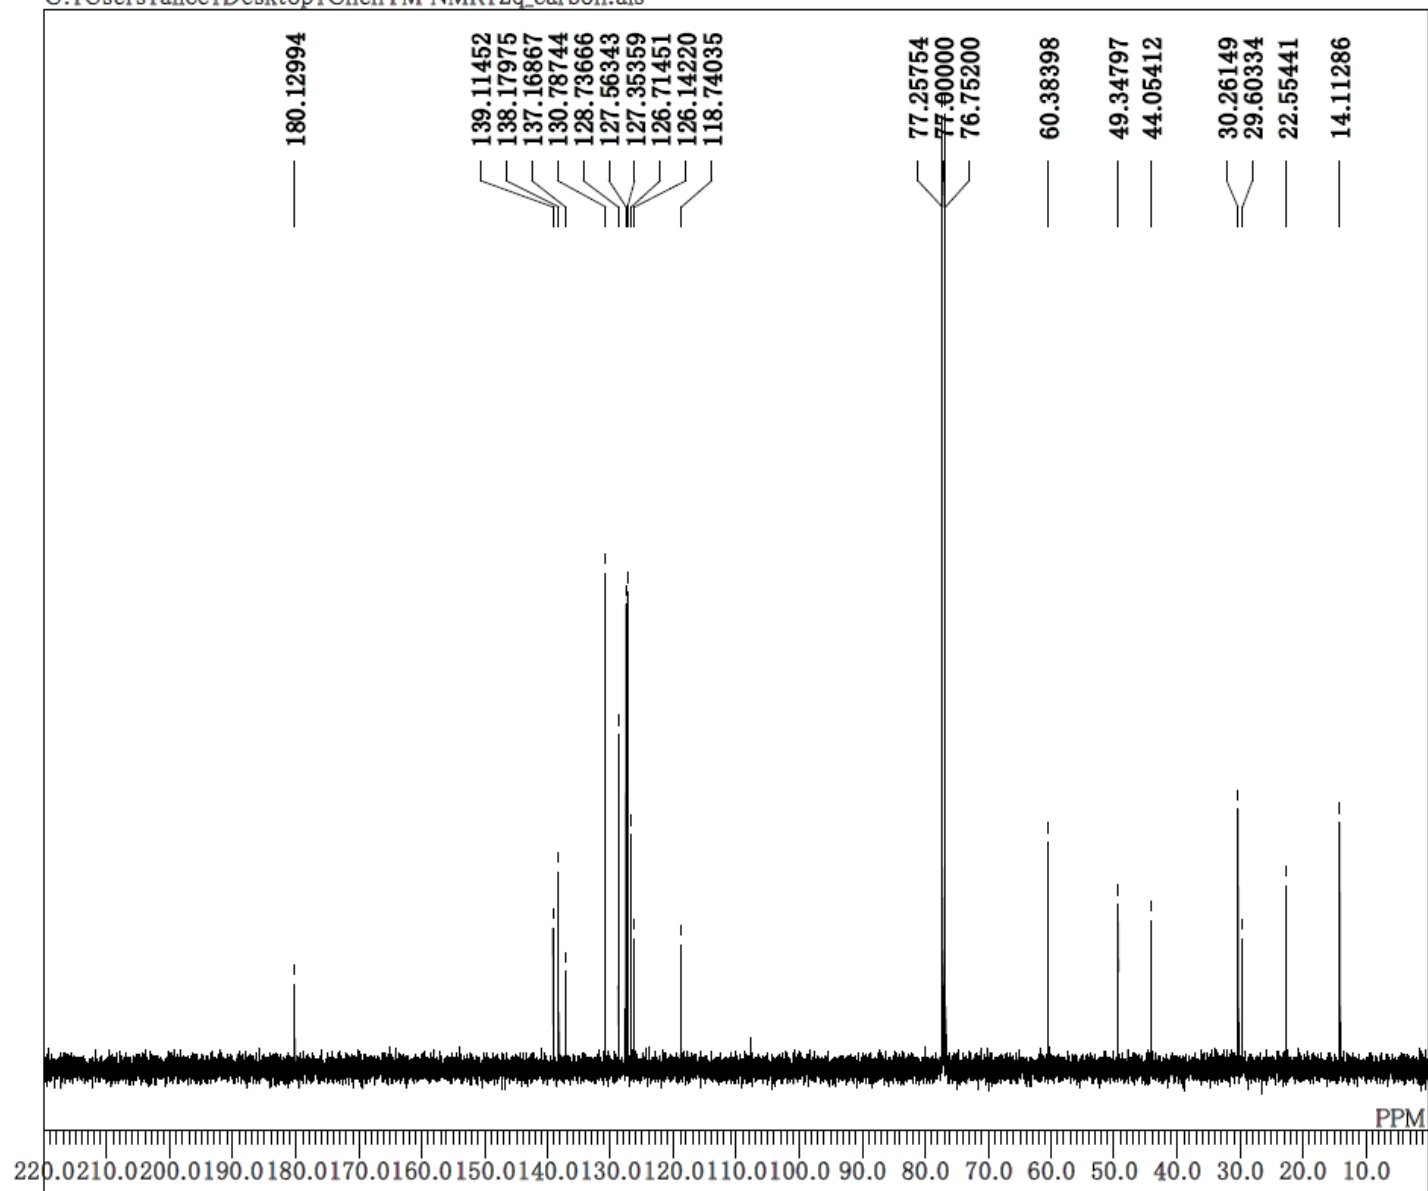

|       |                     |
|-------|---------------------|
| DFILE | 2q_carbon.als       |
| COMNT |                     |
| DATIM | 2020-03-09 14:07:39 |
| OBNUC | <sup>13</sup> C     |
| EXMOD | carbon.jpg          |
| OBFRQ | 125.77 MHz          |
| OBSET | 7.87 KHz            |
| OBFIN | 4.21 Hz             |
| POINT | 26214               |
| FREQU | 31446.54 Hz         |
| SCANS | 144                 |
| ACQTM | 0.8336 sec          |
| PD    | 2.0000 sec          |
| PW1   | 3.40 usec           |
| IRNUC | <sup>1</sup> H      |
| CTEMP | 21.7 c              |
| SLVNT | CDCL <sub>3</sub>   |
| EXREF | 77.00 ppm           |
| BF    | 0.12 Hz             |
| RGAIN | 60                  |



C:\Users\Valice\Desktop\ChenTM NMR\2q'\_proton1.als

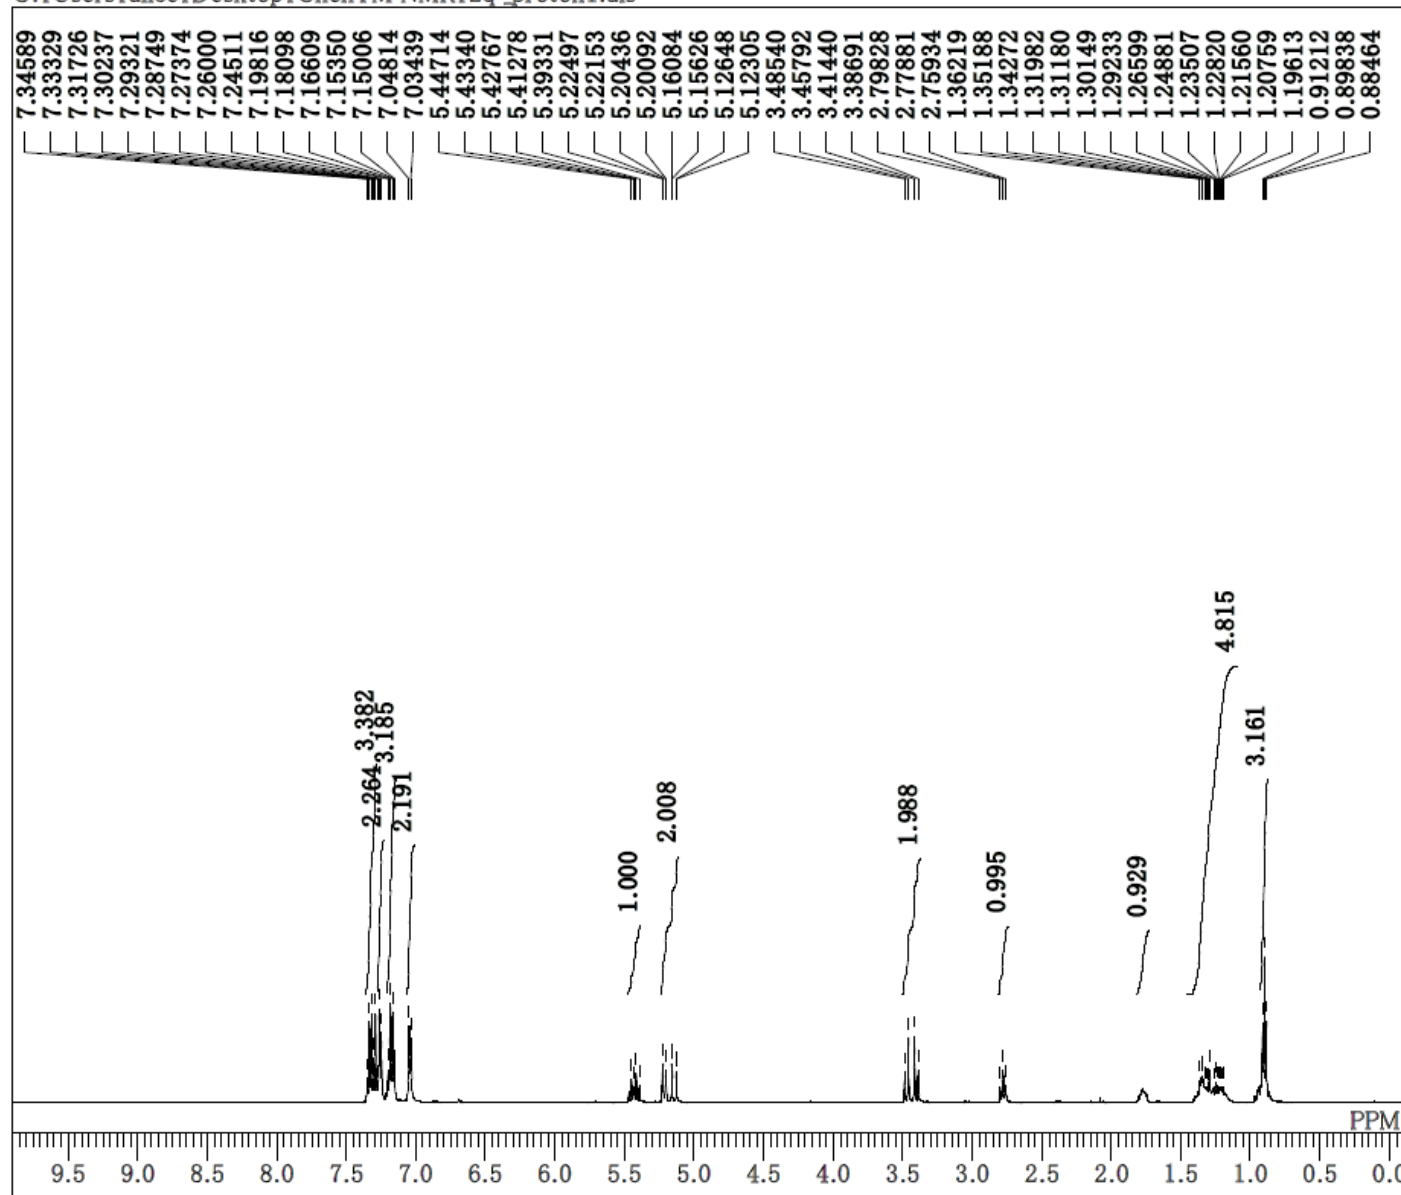

DFILE 2q'\_proton1.als  
 COMNT  
 DATIM 2019-10-04 15:39:14  
 OBNUC 1H  
 EXMOD proton.jxp  
 OBFRQ 500.16 MHz  
 OBSET 2.41 KHz  
 OBFIN 6.01 Hz  
 POINT 13107  
 FREQU 7507.51 Hz  
 SCANS 8  
 ACQTM 1.7459 sec  
 PD 6.0000 sec  
 PW1 5.55 usec  
 IRNUC 1H  
 CTEMP 21.8 c  
 SLVNT CDCL3  
 EXREF 7.26 ppm  
 BF 0.12 Hz  
 RGAIN 40

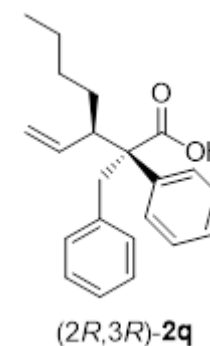

C:\Users\Valice\Desktop\ChenTM NMR\2q'\_carbon.als

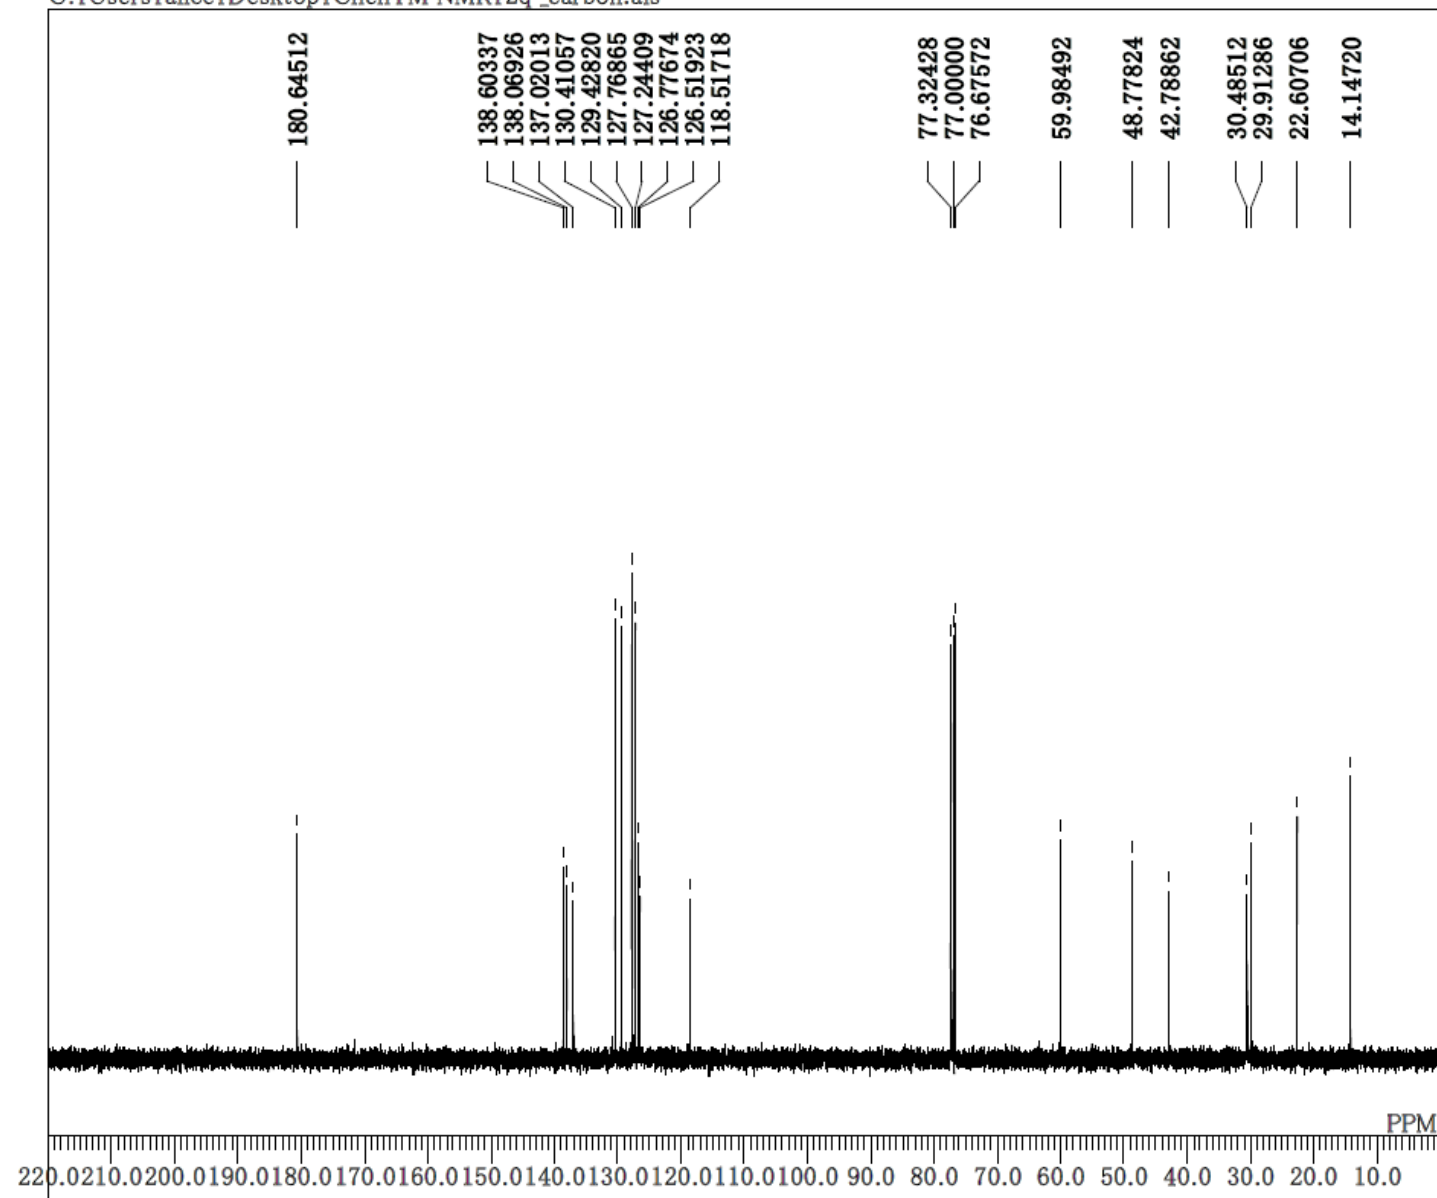

DFILE 2q'\_carbon.als  
 COMNT  
 DATIM 04-10-2019 18:54:38  
 OBNUC 13C  
 EXMOD carbon.jpg  
 OBFRQ 98.52 MHz  
 OBSET 4.64 KHz  
 OBFIN 8.74 Hz  
 POINT 26214  
 FREQU 24630.54 Hz  
 SCANS 116  
 ACQTM 1.0643 sec  
 PD 2.0000 sec  
 PW1 3.12 usec  
 IRNUC 1H  
 CTEMP 21.2 c  
 SLVNT CDCL3  
 EXREF 77.00 ppm  
 BF 0.12 Hz  
 RGAIN 60

C:\Users\valice\Desktop\ChenTM NMR\2r\_proton.als

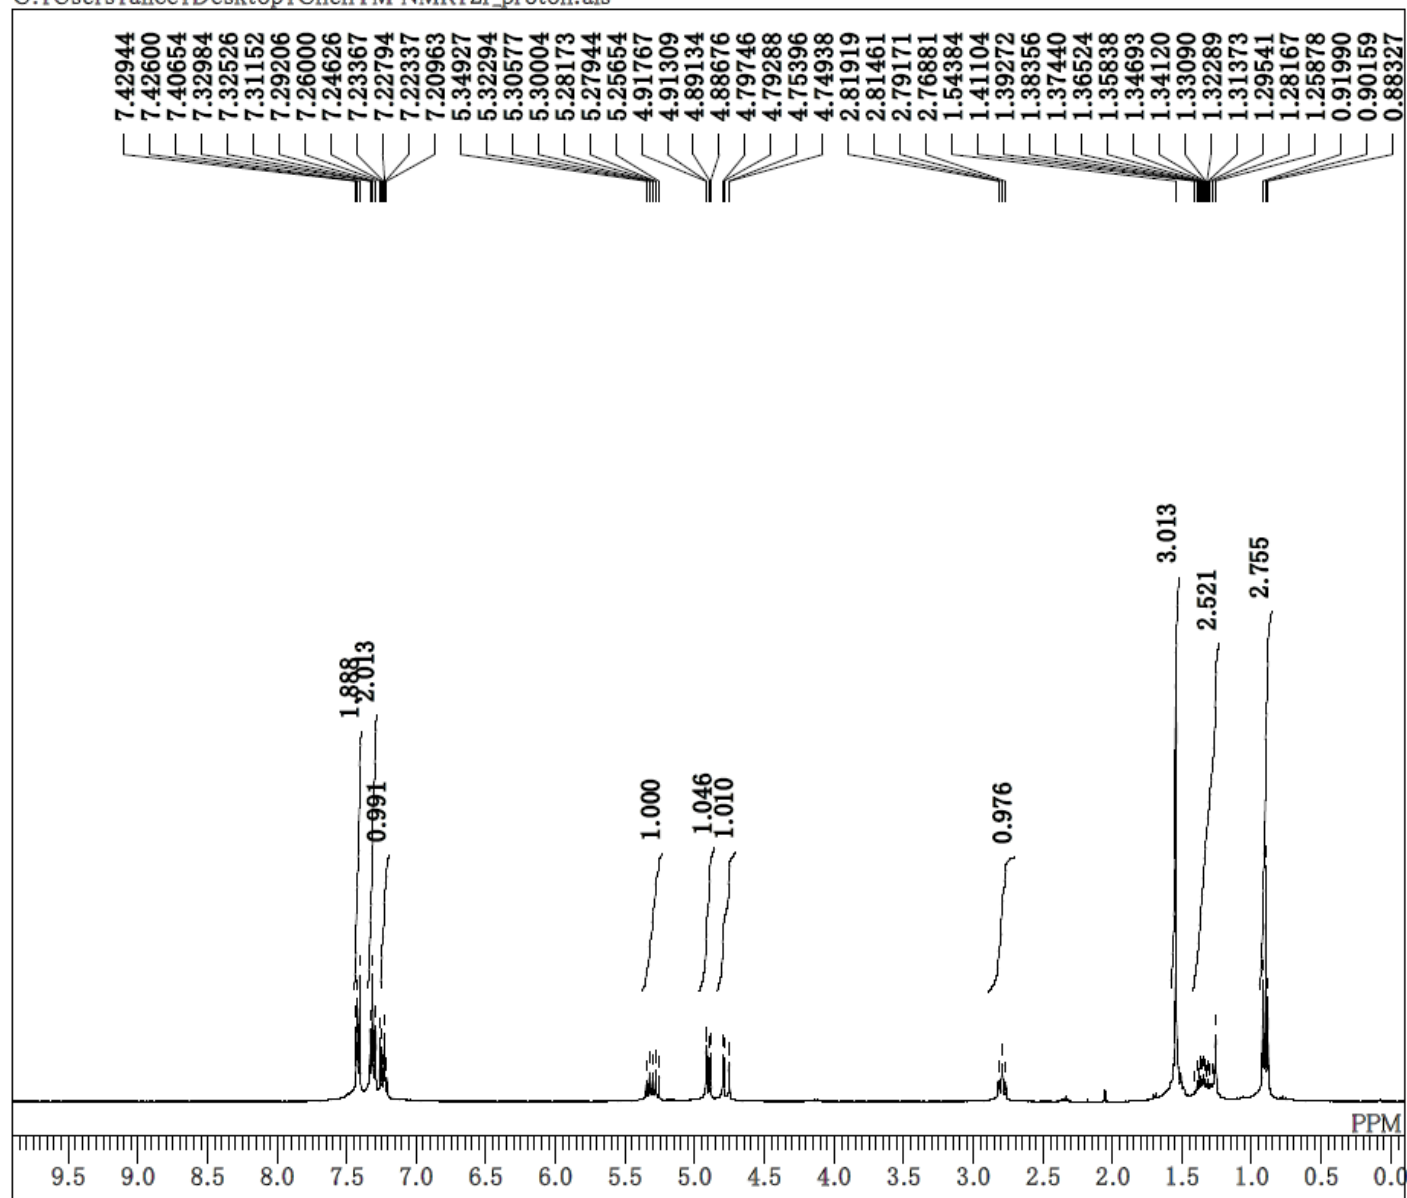

DFILE 2r\_proton.als  
 COMNT  
 DATIM 12-03-2020 17:47:31  
 OBNUC 1H  
 EXMOD proton.jxp  
 OBFRQ 391.78 MHz  
 OBSET 8.51 KHz  
 OBFIN 3.34 Hz  
 POINT 13107  
 FREQU 5878.90 Hz  
 SCANS 8  
 ACQTM 2.2295 sec  
 PD 6.0000 sec  
 PW1 5.17 usec  
 IRNUC 1H  
 CTEMP 20.2 c  
 SLVNT CDCL3  
 EXREF 7.26 ppm  
 BF 0.12 Hz  
 RGAIN 36

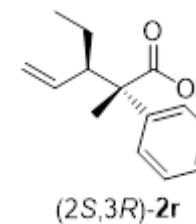

C:\Users\Valice\Desktop\ChenTM NMR\2r\_carbon.als

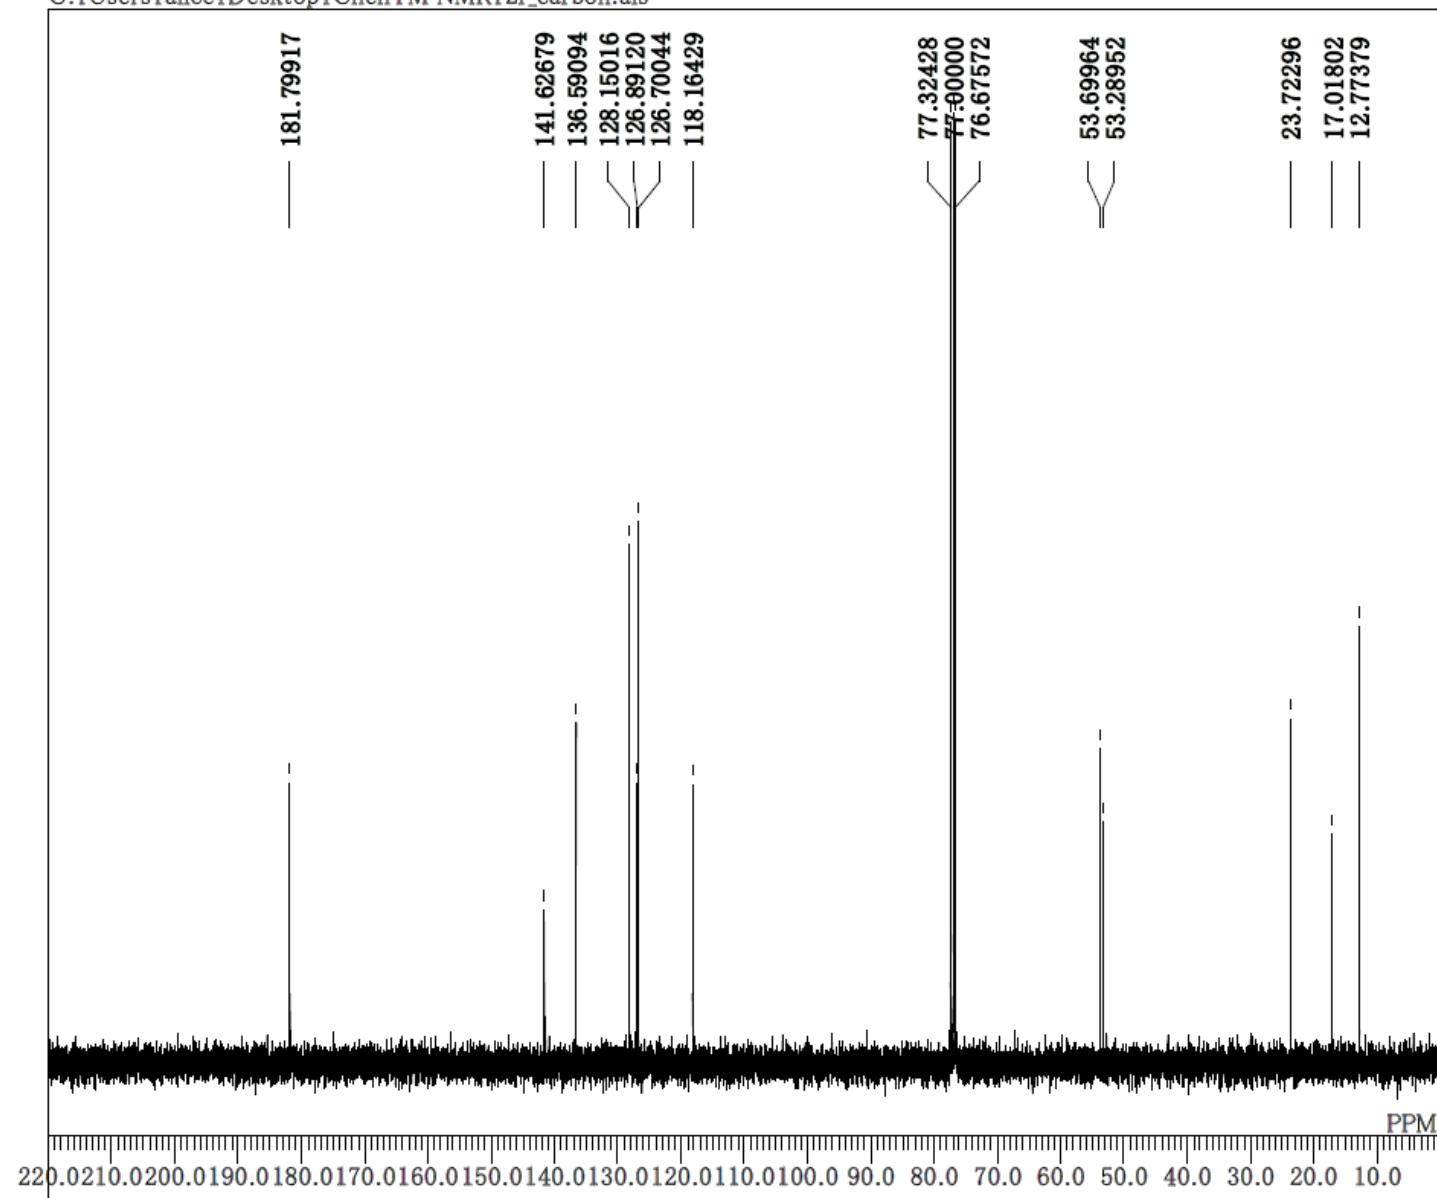

DFILE 2r\_carbon.als  
 COMNT  
 DATIM 12-03-2020 17:33:51  
 OBNUC 13C  
 EXMOD carbon.jpg  
 OBFRQ 98.52 MHz  
 OBSET 4.64 KHz  
 OBFIN 8.74 Hz  
 POINT 26214  
 FREQU 24630.54 Hz  
 SCANS 132  
 ACQTM 1.0643 sec  
 PD 2.0000 sec  
 PW1 3.12 usec  
 IRNUC 1H  
 CTEMP 20.4 c  
 SLVNT CDCL3  
 EXREF 77.00 ppm  
 BF 0.12 Hz  
 RGAIN 60

C:\Users\Valice\Desktop\ChenTM NMR\2r'\_proton.als

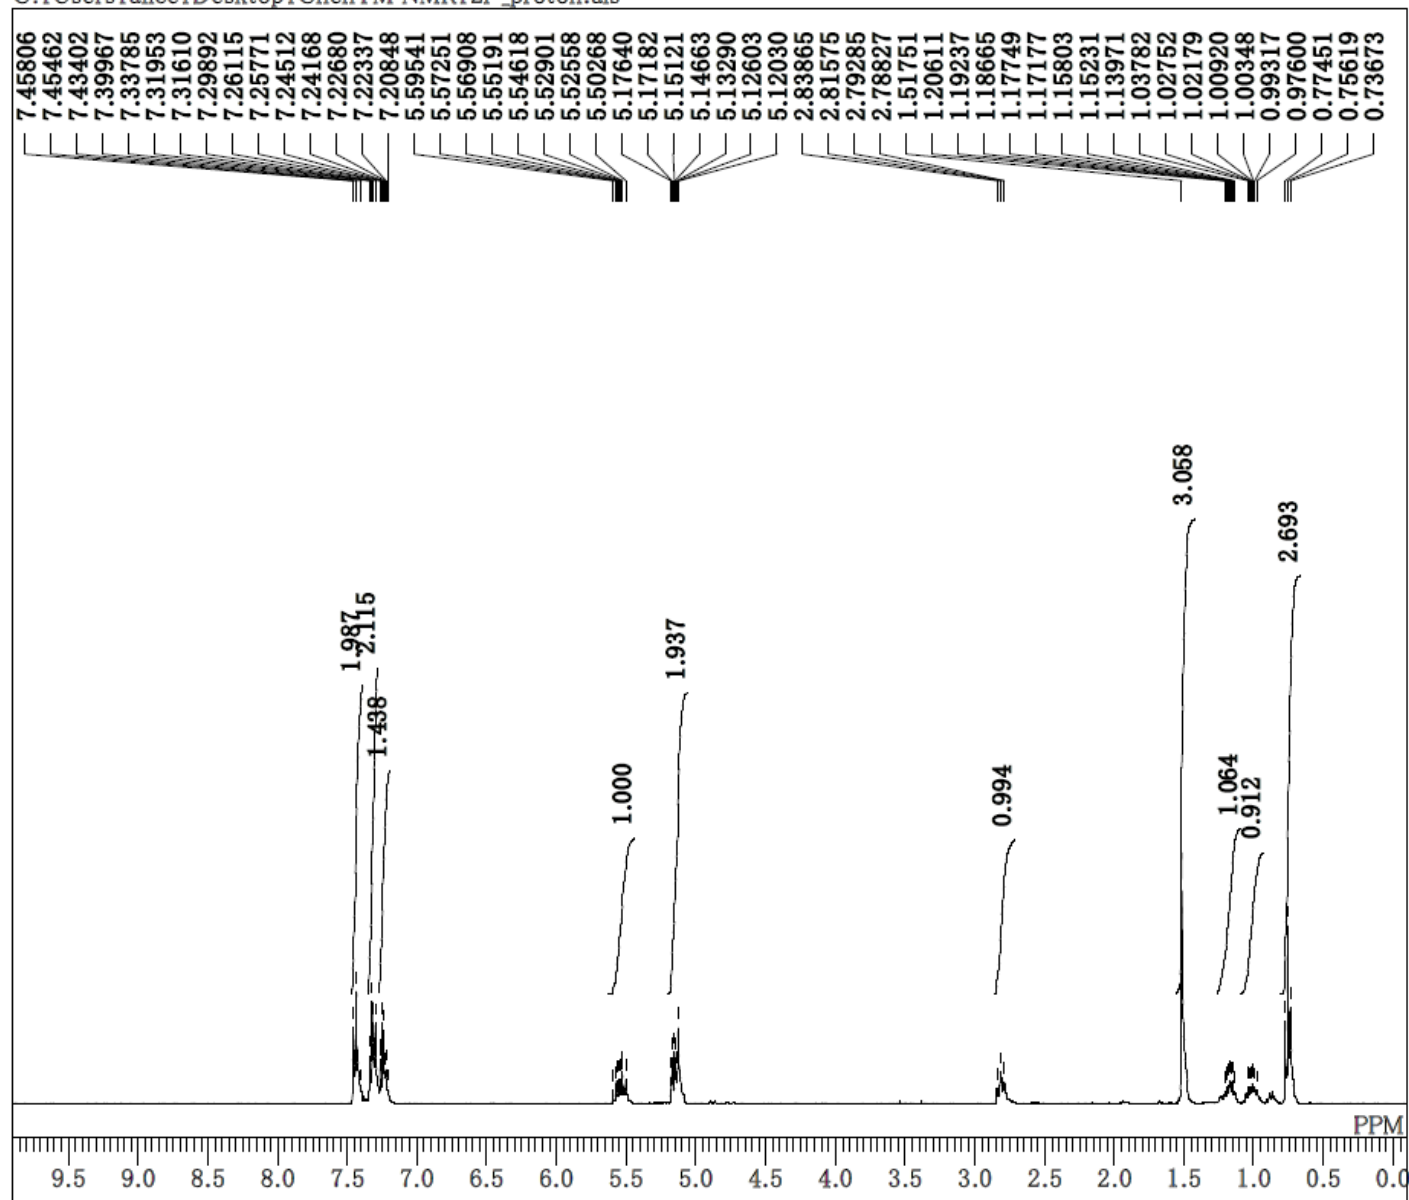

DFILE 2r'\_proton.als  
 COMNT  
 DATIM 12-03-2020 22:36:53  
 OBNUC 1H  
 EXMOD proton.jxp  
 OBFRQ 391.78 MHz  
 OBSET 8.51 KHz  
 OBFIN 3.34 Hz  
 POINT 13107  
 FREQU 5878.90 Hz  
 SCANS 8  
 ACQTM 2.2295 sec  
 PD 6.0000 sec  
 PW1 5.17 usec  
 IRNUC 1H  
 CTEMP 20.2 c  
 SLVNT CDCL3  
 EXREF 7.26 ppm  
 BF 0.12 Hz  
 RGAIN 38

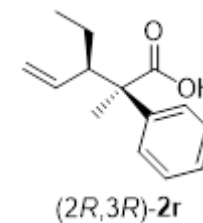

C:\Users\alice\Desktop\ChenTM NMR\2r'\_carbon.als

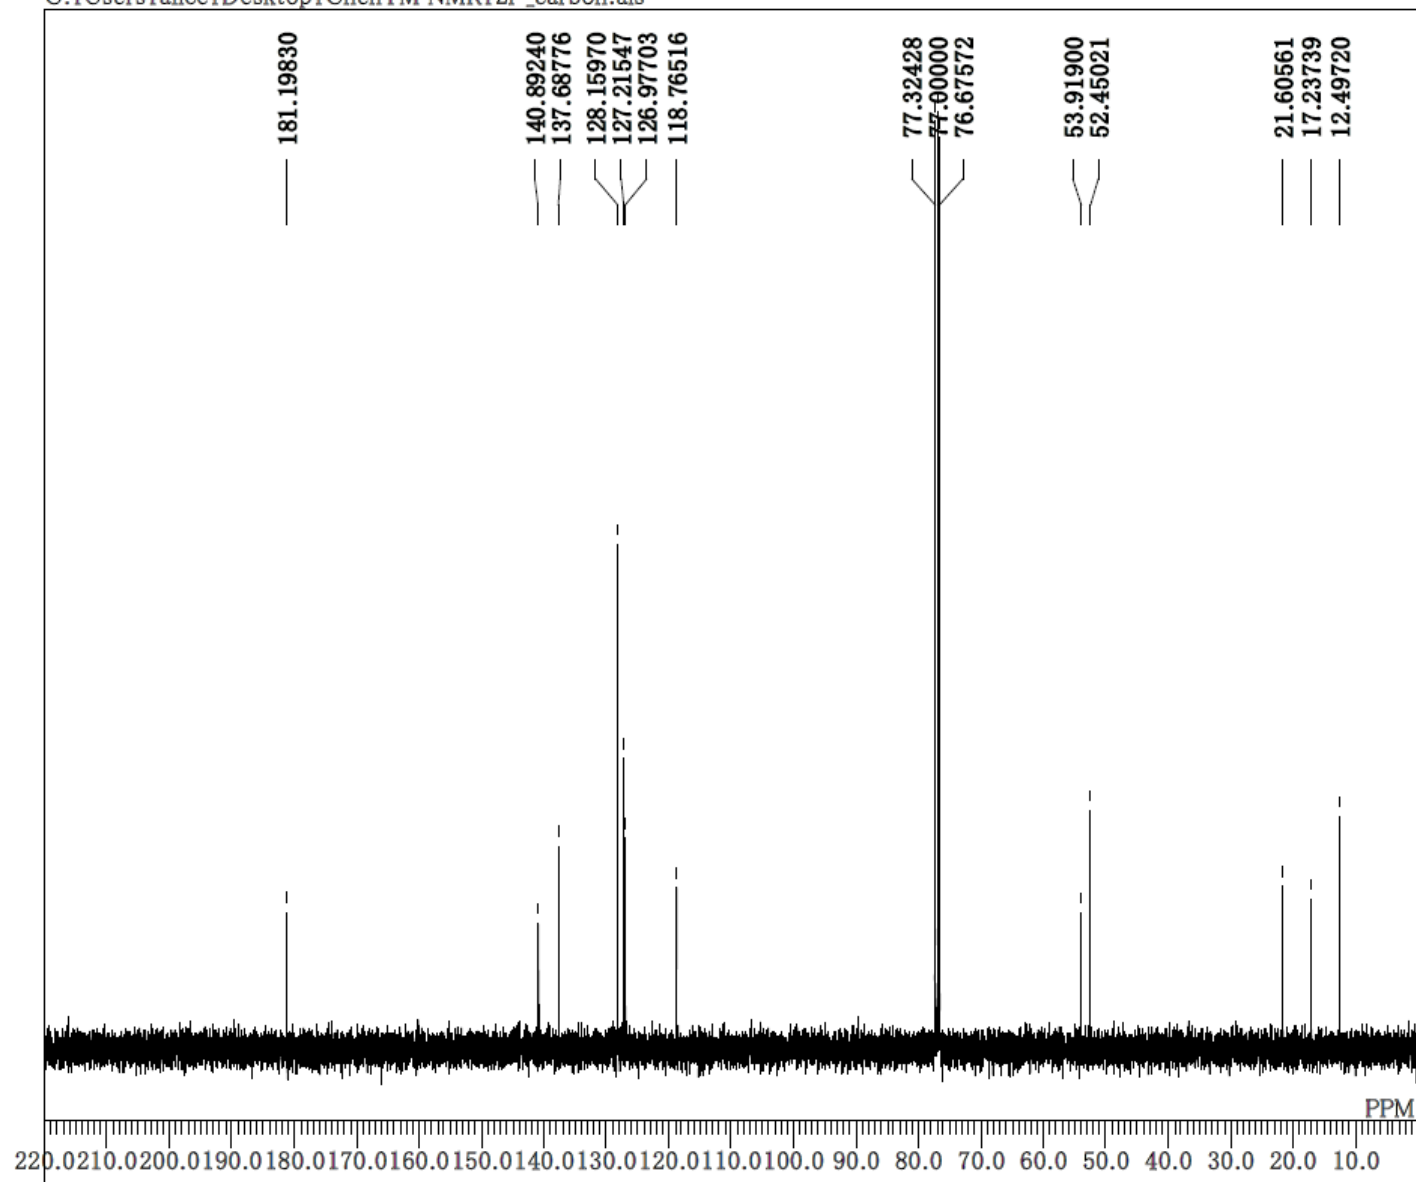

2r'\_carbon.als

|       |                     |
|-------|---------------------|
| DFILE | 2r'_carbon.als      |
| COMNT |                     |
| DATIM | 12-03-2020 22:39:27 |
| OBNUC | 13C                 |
| EXMOD | carbon.jpg          |
| OBFRQ | 98.52 MHz           |
| OBSET | 4.64 KHz            |
| OBFIN | 8.74 Hz             |
| POINT | 26214               |
| FREQU | 24630.54 Hz         |
| SCANS | 208                 |
| ACQTM | 1.0643 sec          |
| PD    | 2.0000 sec          |
| PW1   | 3.12 usec           |
| IRNUC | 1H                  |
| CTEMP | 20.4 c              |
| SLVNT | CDCL3               |
| EXREF | 77.00 ppm           |
| BF    | 0.12 Hz             |
| RGAIN | 60                  |

C:\Users\Valice\Desktop\ChenTM NMR\2s\_proton.als

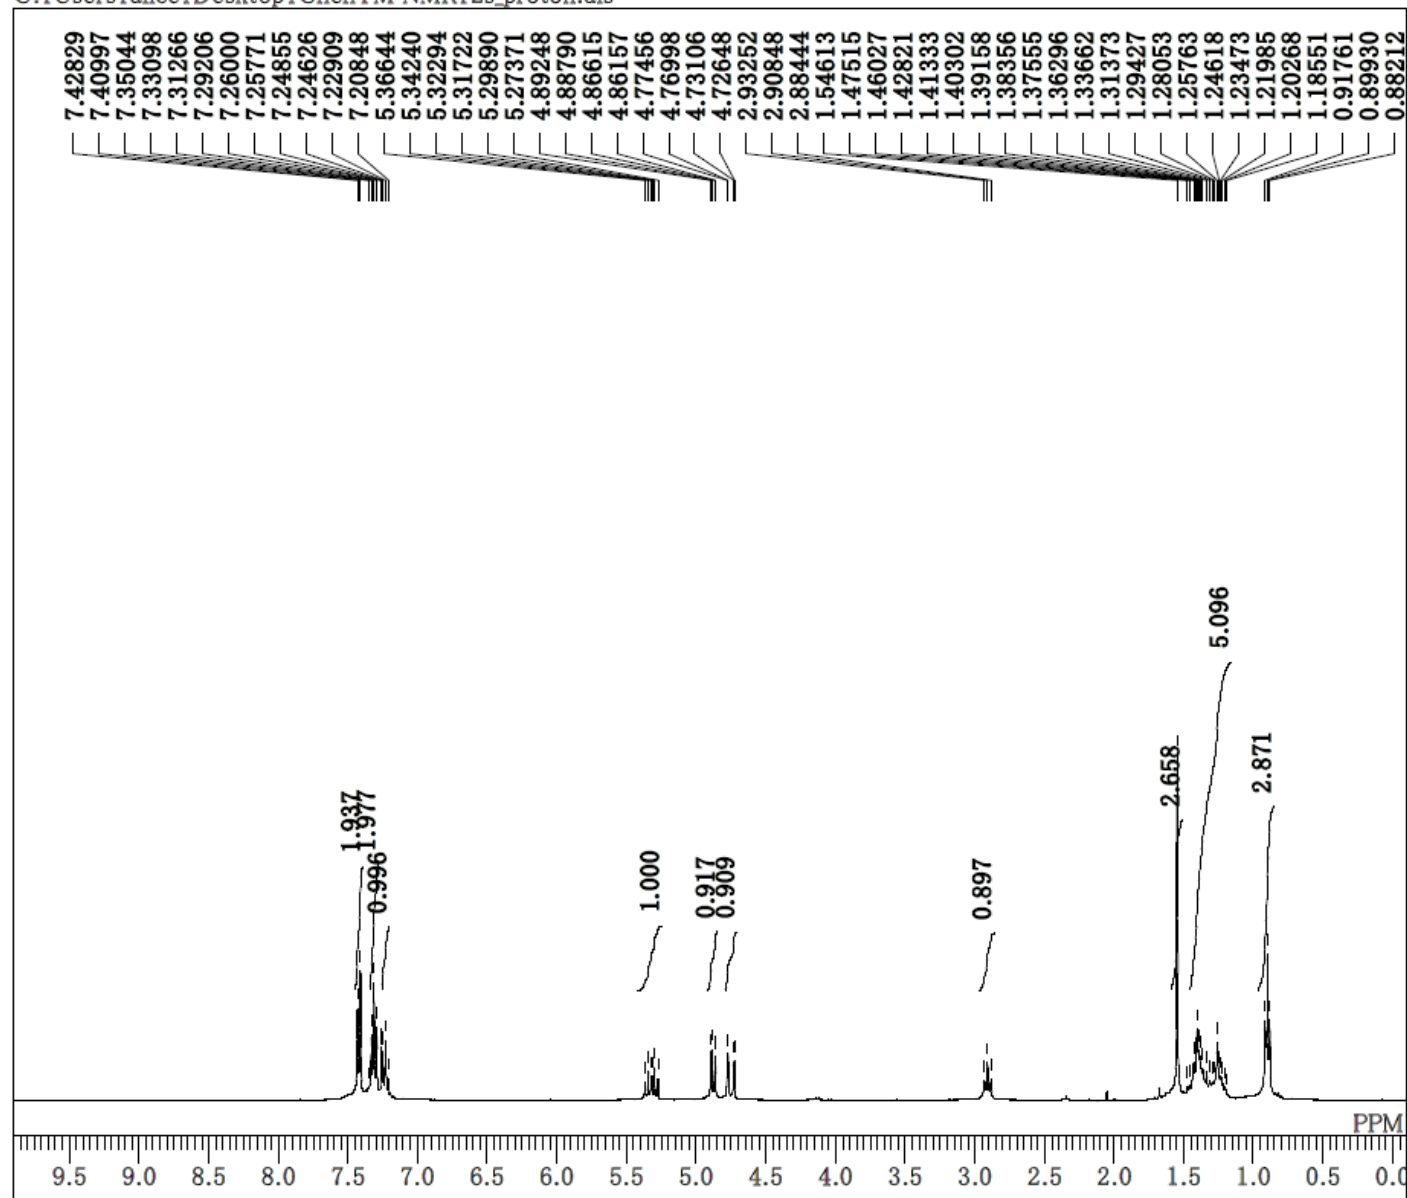

DFILE  
COMNT  
DATIM  
OBNUC  
EXMOD  
OBFRQ  
OBSET  
OBFIN  
POINT  
FREQU  
SCANS  
ACQTM  
PD  
PW1  
IRNUC  
CTEMP  
SLVNT  
EXREF  
BF  
RGAIN

2s\_proton.als  
12-03-2020 12:15:02  
1H  
proton.jxp  
391.78 MHz  
8.51 KHz  
3.34 Hz  
13107  
5878.90 Hz  
8  
2.2295 sec  
6.0000 sec  
5.17 usec  
1H  
20.5 c  
CDCL3  
7.26 ppm  
0.12 Hz  
34

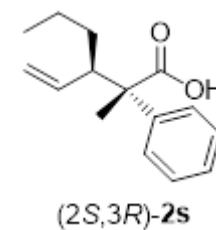

C:\Users\Valice\Desktop\ChenTM NMR\2s\_carbon.als

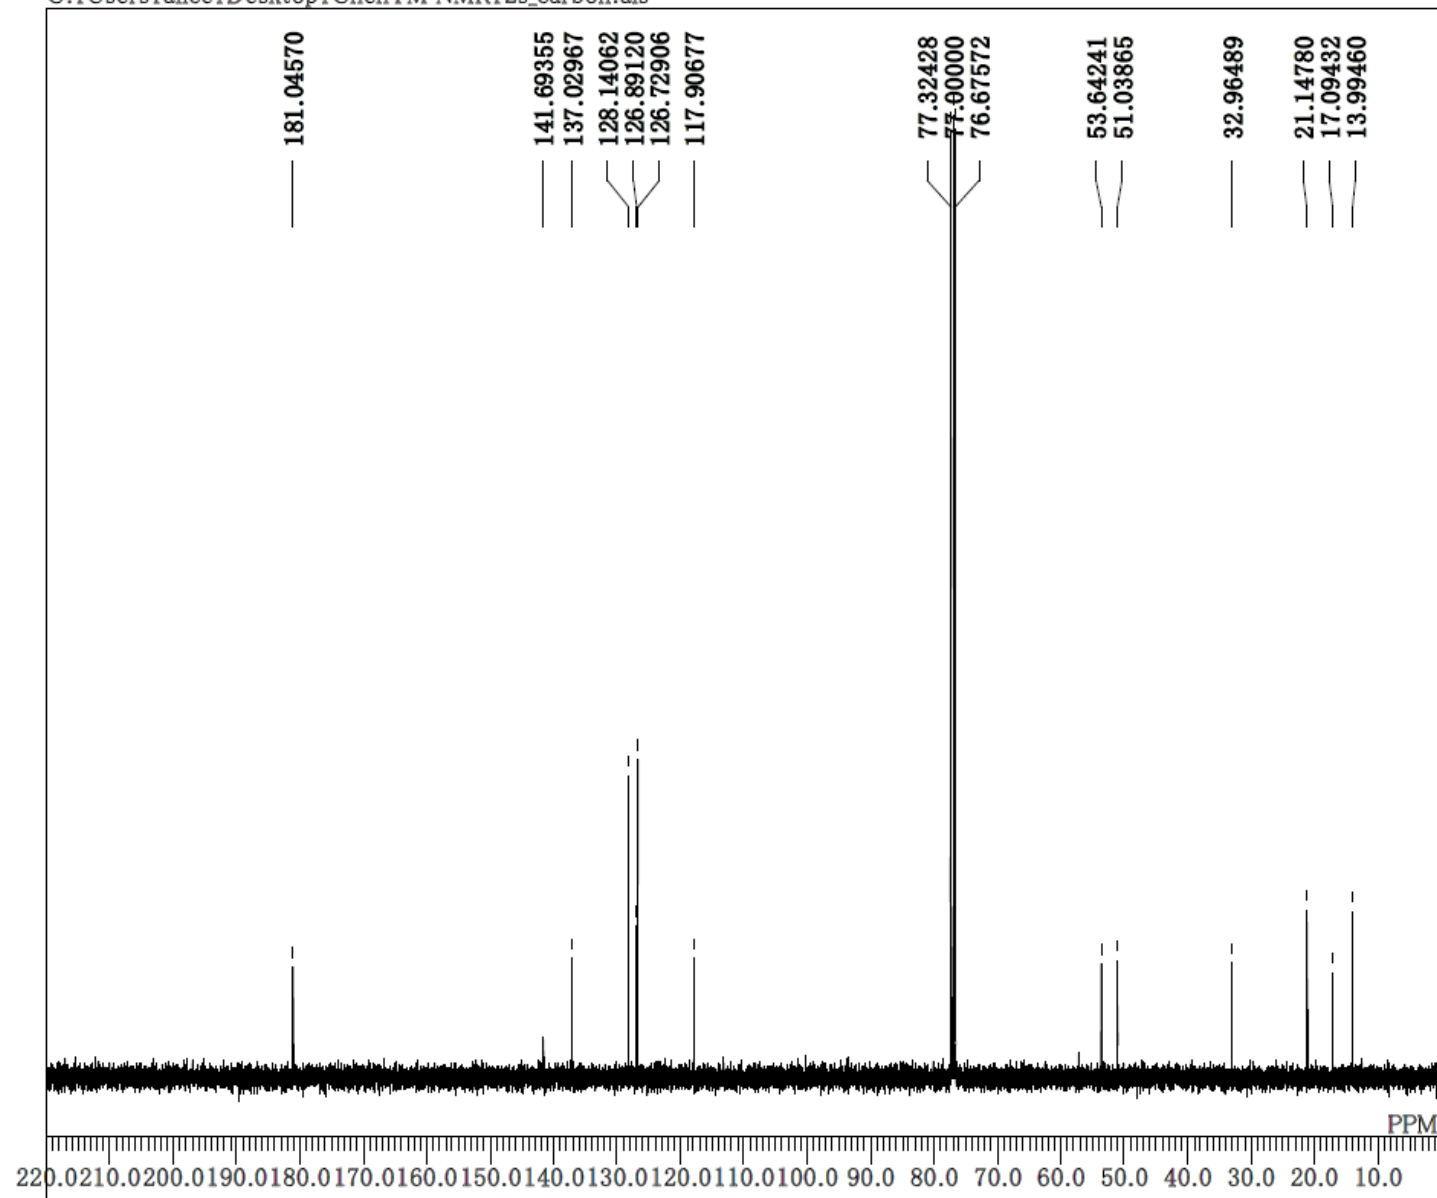

DFILE 2s\_carbon.als  
 COMNT  
 DATIM 11-03-2020 21:51:47  
 OBNUC 13C  
 EXMOD carbon.jpg  
 OBFRQ 98.52 MHz  
 OBSET 4.64 KHz  
 OBFIN 8.74 Hz  
 POINT 26214  
 FREQU 24630.54 Hz  
 SCANS 436  
 ACQTM 1.0643 sec  
 PD 2.0000 sec  
 PW1 3.12 usec  
 IRNUC 1H  
 CTEMP 20.4 c  
 SLVNT CDCL3  
 EXREF 77.00 ppm  
 BF 0.12 Hz  
 RGAIN 60



C:\Users\alice\Desktop\ChenTM NMR\2s'\_proton.als

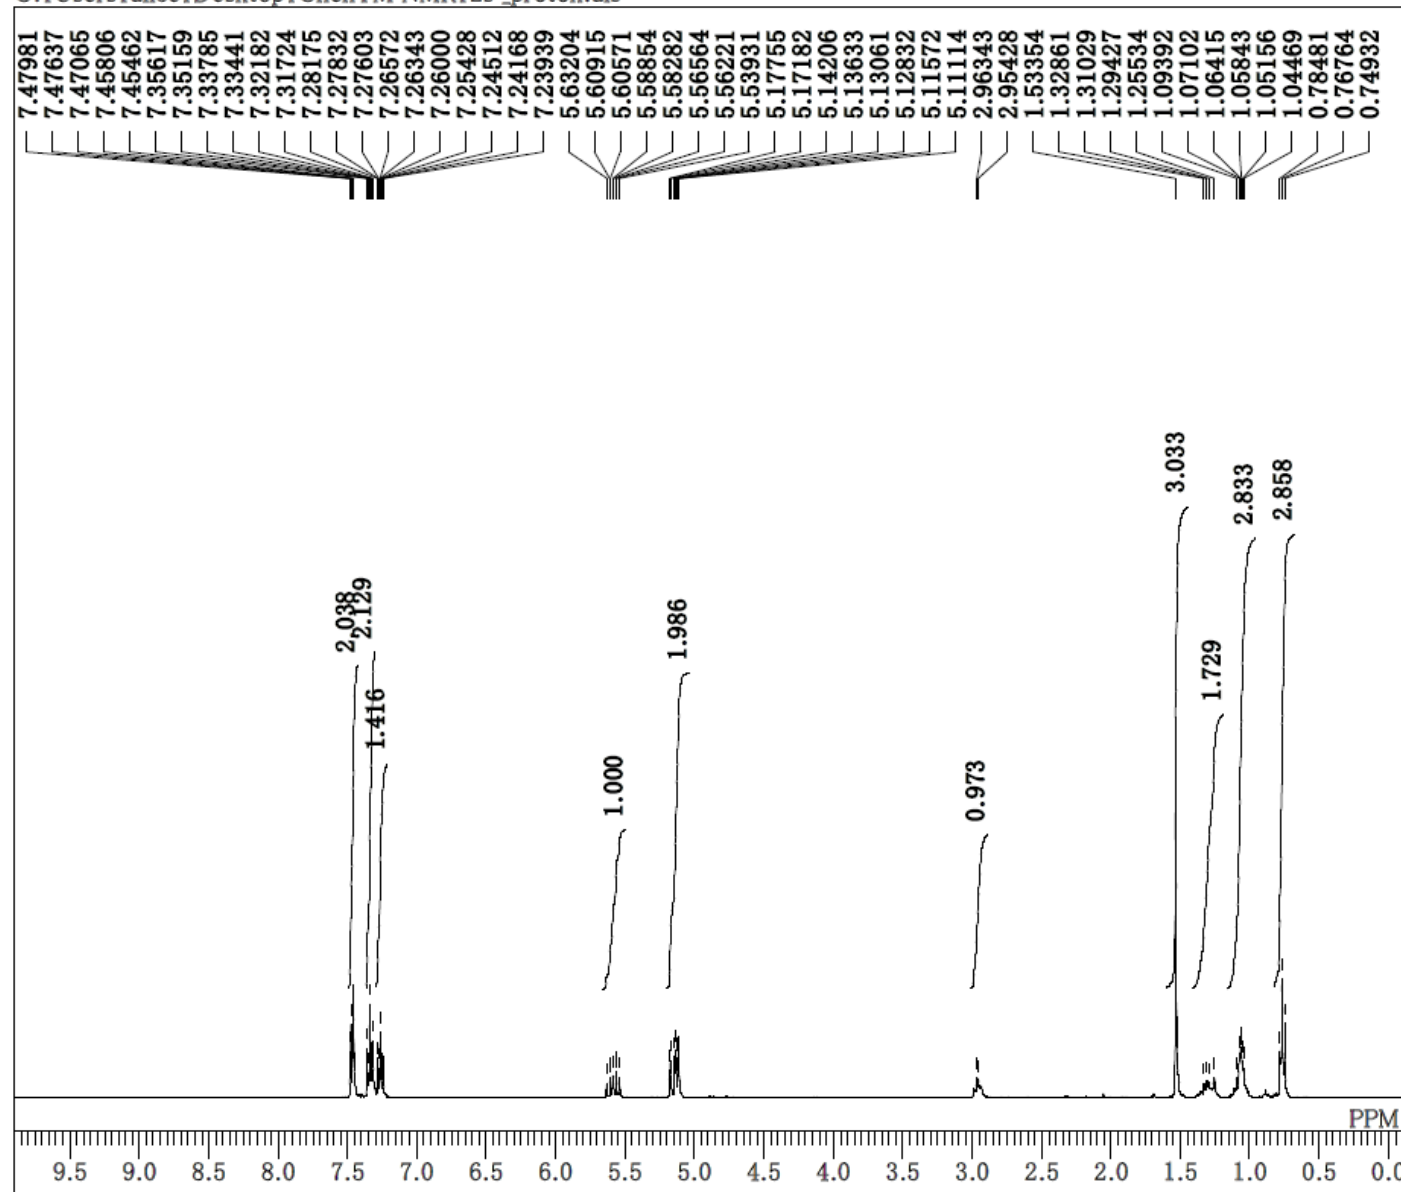

DFILE  
COMNT  
DATIM  
OBNUC  
EXMOD  
OBFRQ  
OBSET  
OBFIN  
POINT  
FREQU  
SCANS  
ACQTM  
PD  
PW1  
IRNUC  
CTEMP  
SLVNT  
EXREF  
BF  
RGAIN

2s'\_proton.als  
10-03-2020 13:19:28  
1H  
proton.jpg  
391.78 MHz  
8.51 KHz  
3.34 Hz  
13107  
5878.90 Hz  
8  
2.2295 sec  
6.0000 sec  
5.17 usec  
1H  
20.2 c  
CDCL3  
7.26 ppm  
0.12 Hz  
36

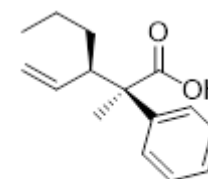

(2R,3R)-2s

C:\Users\alice\Desktop\ChenTM NMR\2s'\_carbon.als

DFILE 2s'\_carbon.als  
 COMNT  
 DATIM 10-03-2020 13:02:08  
 OBNUC 13C  
 EXMOD carbon.jpg  
 OBFRQ 98.52 MHz  
 OBSET 4.64 KHz  
 OBFIN 8.74 Hz  
 POINT 26214  
 FREQU 24630.54 Hz  
 SCANS 275  
 ACQTM 1.0643 sec  
 PD 2.0000 sec  
 PW1 3.12 usec  
 IRNUC 1H  
 CTEMP 20.4 c  
 SLVNT CDCL3  
 EXREF 77.00 ppm  
 BF 0.12 Hz  
 RGAIN 60

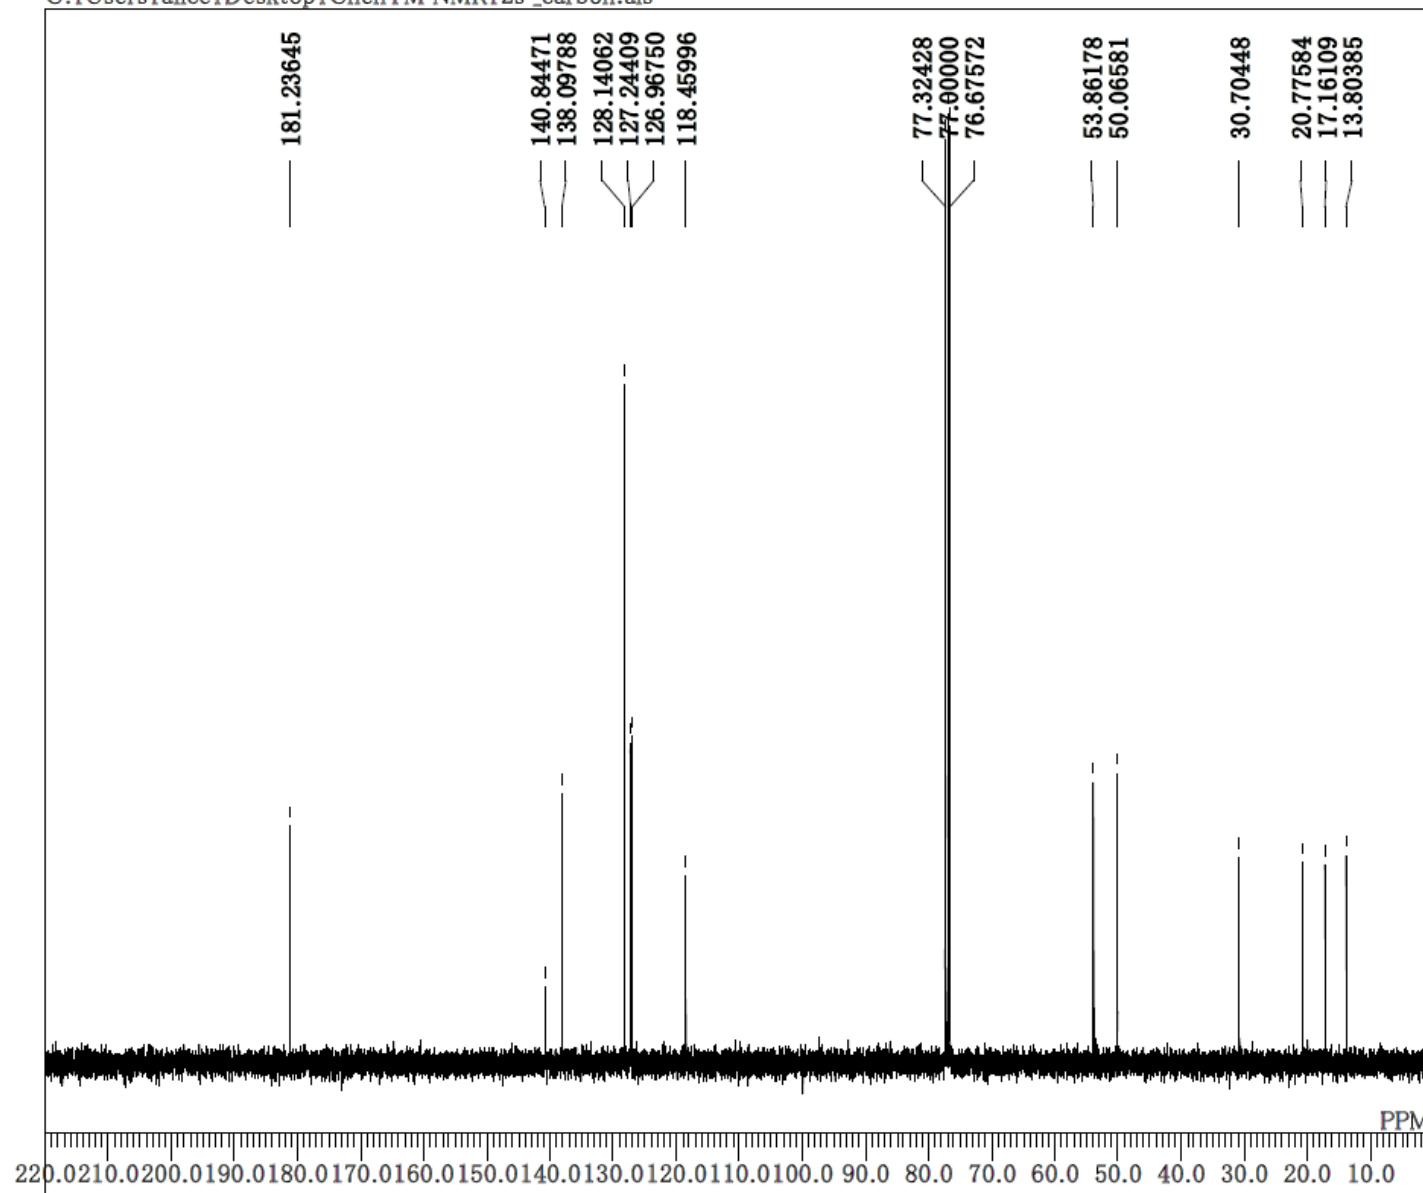

C:\Users\valice\Desktop\ChenTM NMR\2t\_proton.als

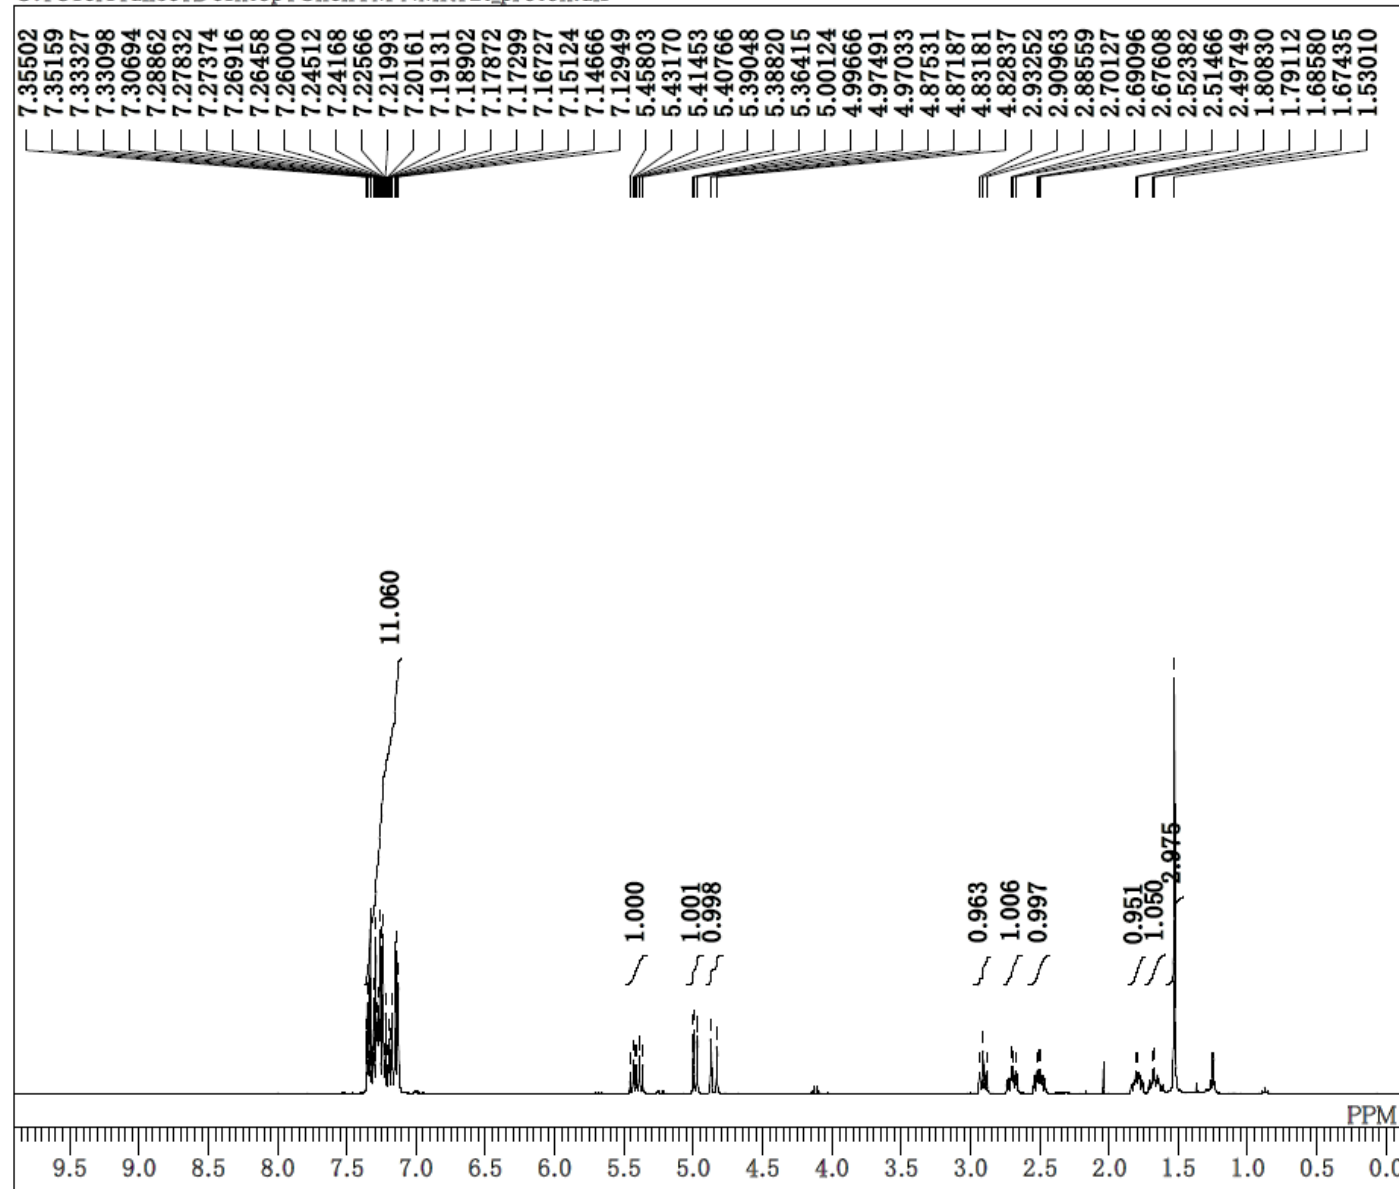

DFILE 2t\_proton.als  
COMNT  
DATIM 03-04-2020 12:45:38  
OBNUC 1H  
EXMOD proton.jxp  
OBFRQ 391.78 MHz  
OBSET 8.51 KHz  
OBFIN 3.34 Hz  
POINT 13107  
FREQU 5878.90 Hz  
SCANS 8  
ACQTM 2.2295 sec  
PD 6.0000 sec  
PW1 5.17 usec  
IRNUC 1H  
CTEMP 20.4 c  
SLVNT CDCL3  
EXREF 7.26 ppm  
BF 0.12 Hz  
RGAIN 36

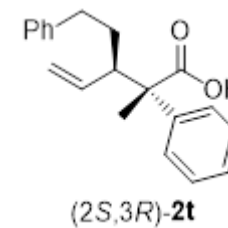

C:\Users\Valice\Desktop\ChenTM NMR\2t\_carbon.als

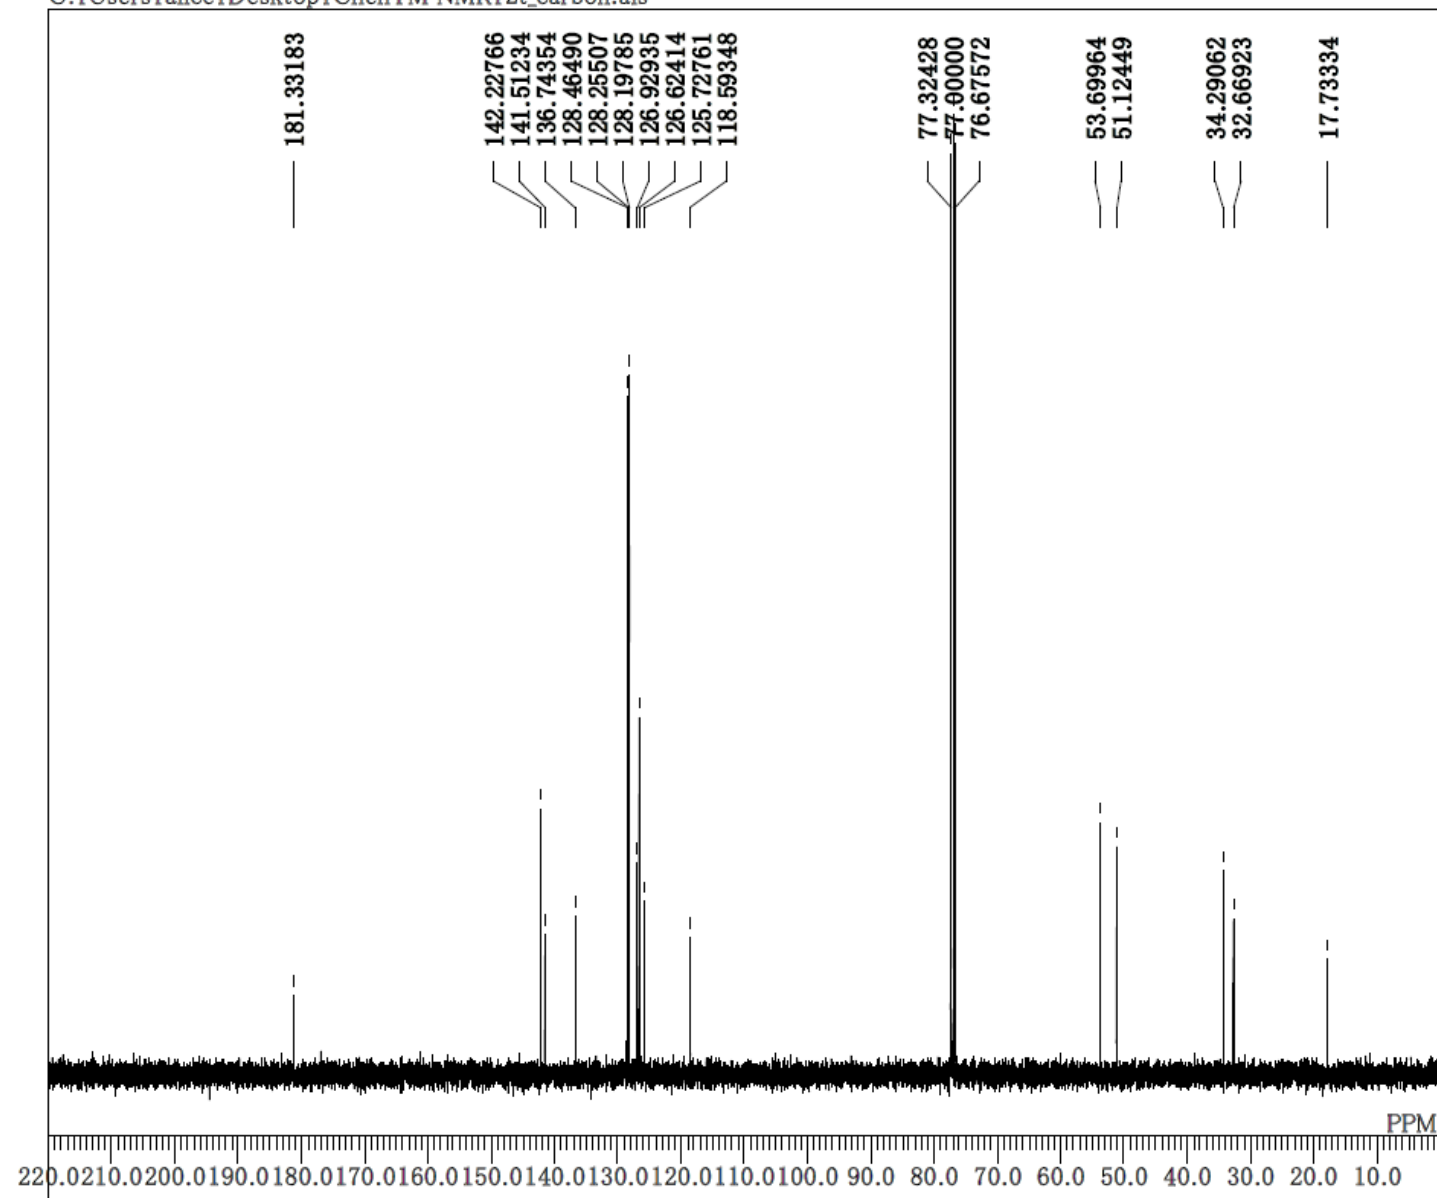

DFILE 2t\_carbon.als  
 COMNT  
 DATIM 03-04-2020 12:34:33  
 OBNUC 13C  
 EXMOD carbon.jpg  
 OBFRQ 98.52 MHz  
 OBSET 4.64 KHz  
 OBFIN 8.74 Hz  
 POINT 26214  
 FREQU 24630.54 Hz  
 SCANS 184  
 ACQTM 1.0643 sec  
 PD 2.0000 sec  
 PW1 3.12 usec  
 IRNUC 1H  
 CTEMP 20.6 c  
 SLVNT CDCL3  
 EXREF 77.00 ppm  
 BF 0.12 Hz  
 RGAIN 60

C:\Users\Falice\Desktop\ChenTM NMR\2t'\_proton.als

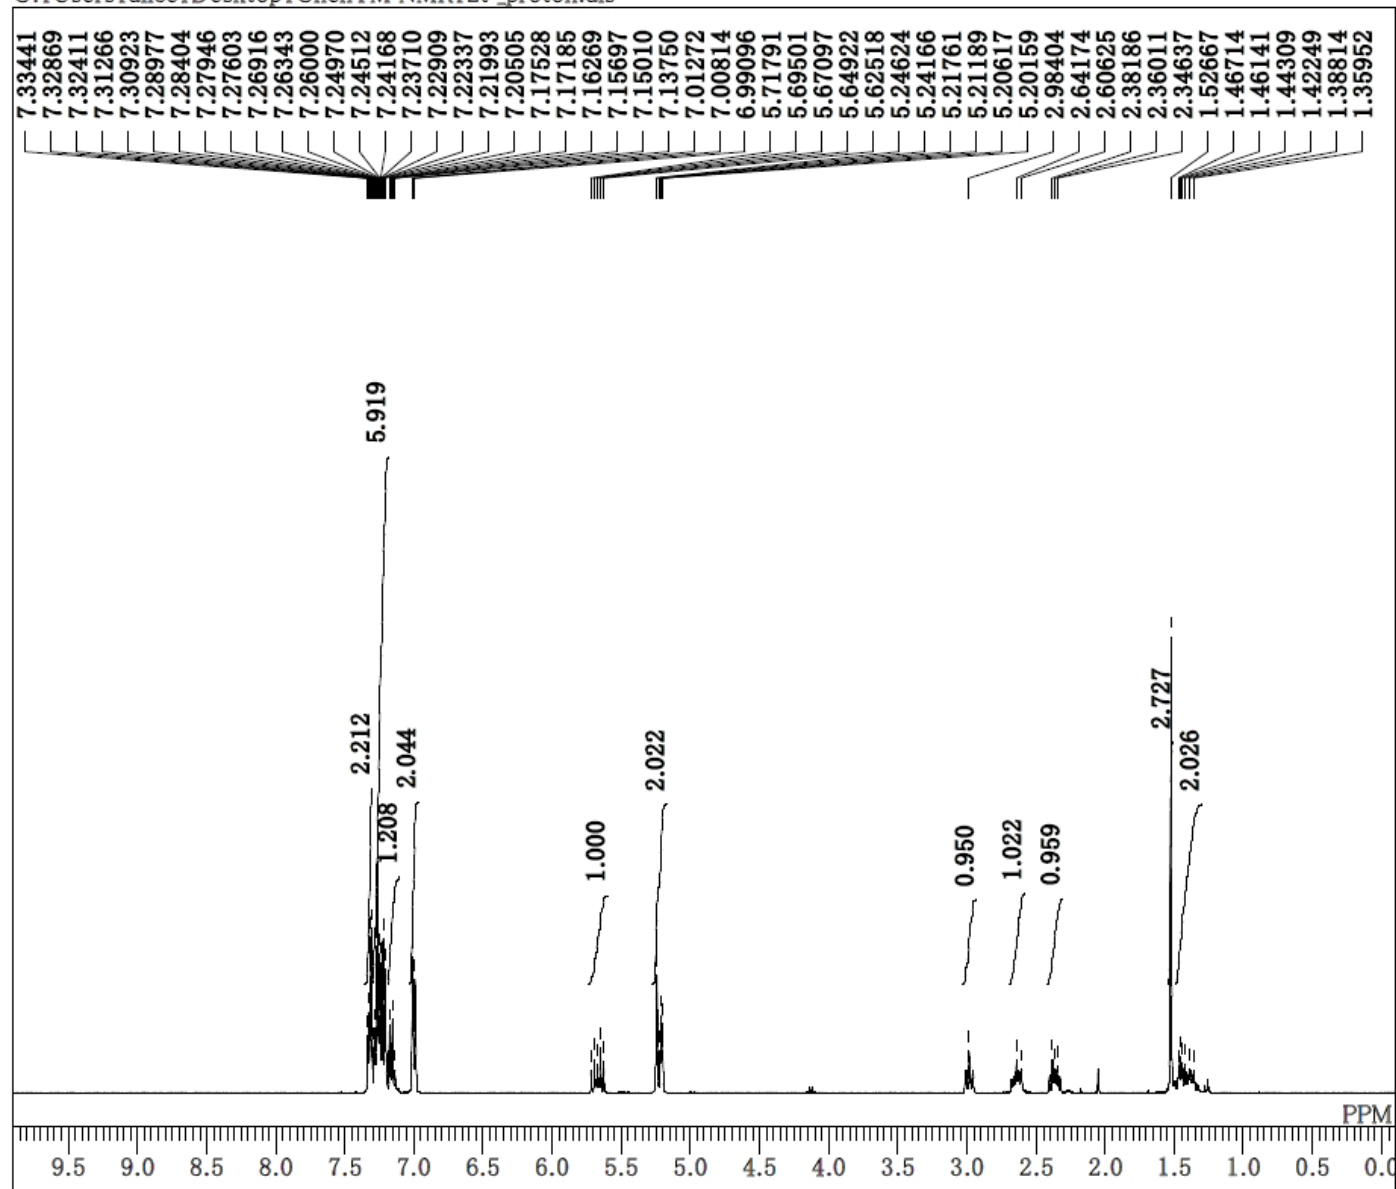

2t'\_proton.als

31-03-2020 20:09:41

1H

proton.jpg

OBFRQ 391.78 MHz

OBSET 8.51 KHz

OBFIN 3.34 Hz

POINT 13107

FREQU 5878.90 Hz

SCANS 8

ACQTM 2.2295 sec

PD 6.0000 sec

PW1 5.17 usec

IRNUC 1H

CTEMP 20.2 c

SLVNT CDCL3

EXREF 7.26 ppm

BF 0.12 Hz

RGAIN 42

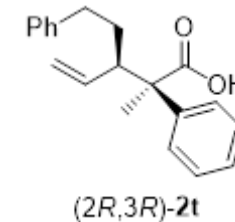

C:\Users\Valice\Desktop\ChenTM NMR\2t'\_carbon.als

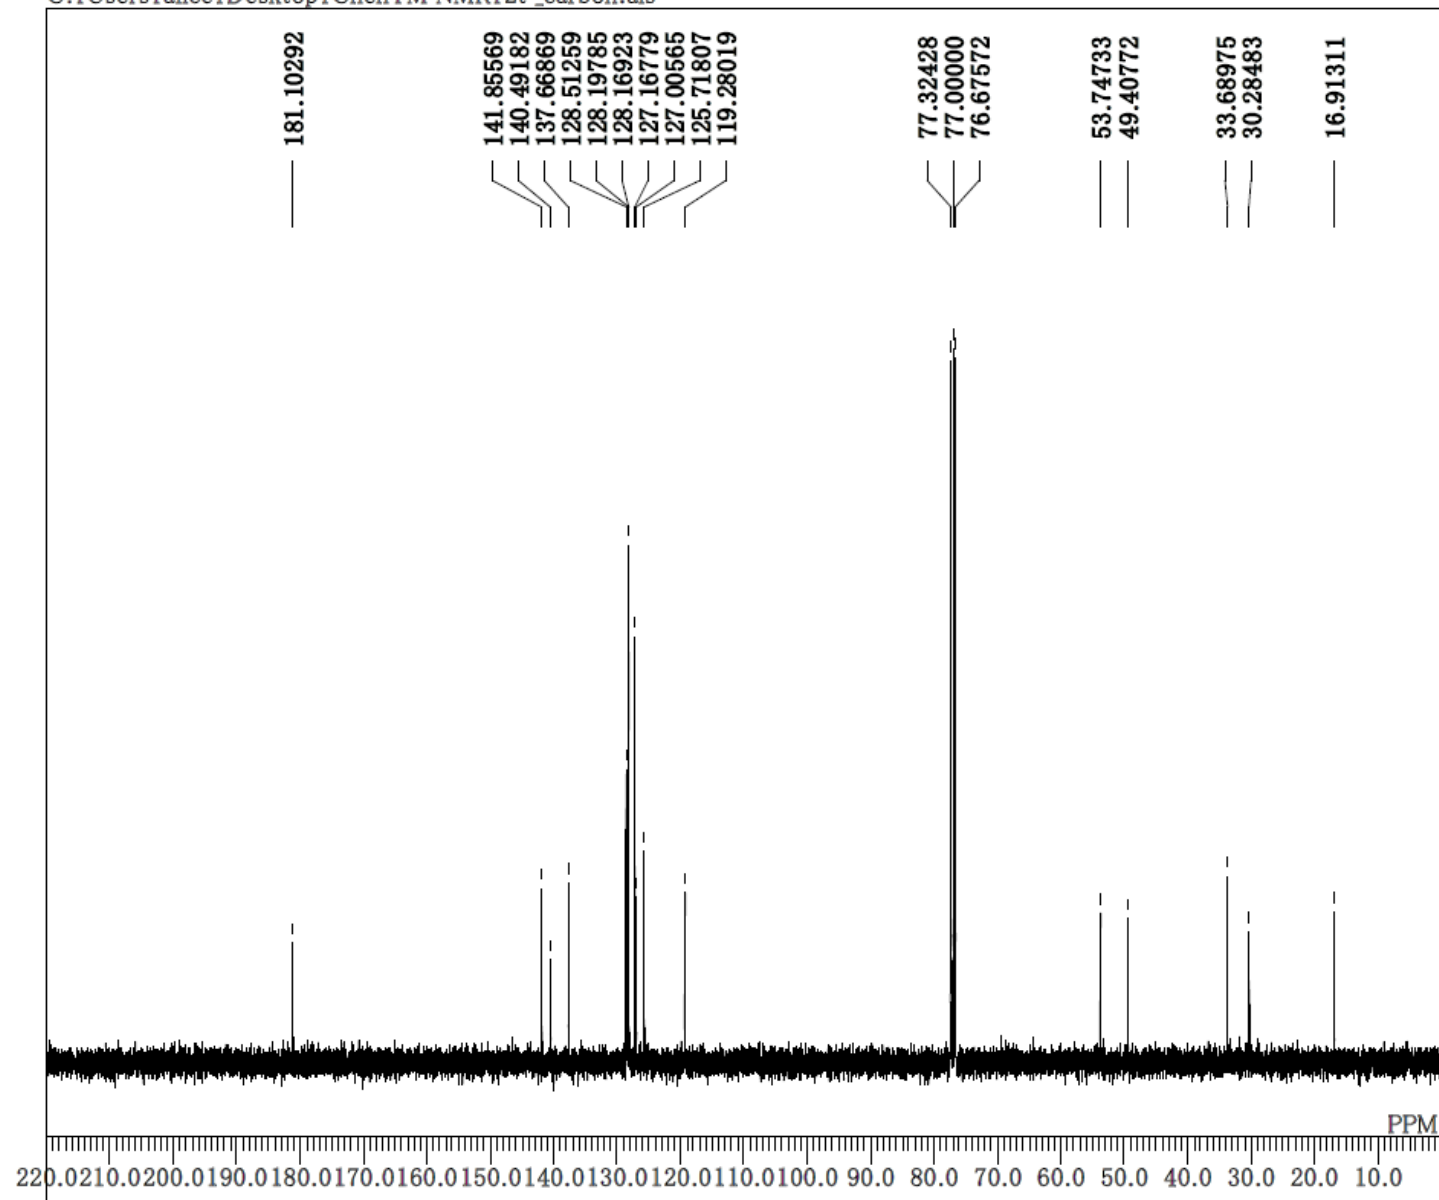

|       |                     |
|-------|---------------------|
| DFILE | 2t'_carbon.als      |
| COMNT |                     |
| DATIM | 31-03-2020 19:06:05 |
| OBNUC | 13C                 |
| EXMOD | carbon.jpg          |
| OBFRQ | 98.52 MHz           |
| OBSET | 4.64 KHz            |
| OBFIN | 8.74 Hz             |
| POINT | 26214               |
| FREQU | 24630.54 Hz         |
| SCANS | 301                 |
| ACQTM | 1.0643 sec          |
| PD    | 2.0000 sec          |
| PW1   | 3.12 usec           |
| IRNUC | 1H                  |
| CTEMP | 20.4 c              |
| SLVNT | CDCL3               |
| EXREF | 77.00 ppm           |
| BF    | 0.12 Hz             |
| RGAIN | 60                  |

C:\Users\Valice\Desktop\ChenTM NMR\2u\_proton.als

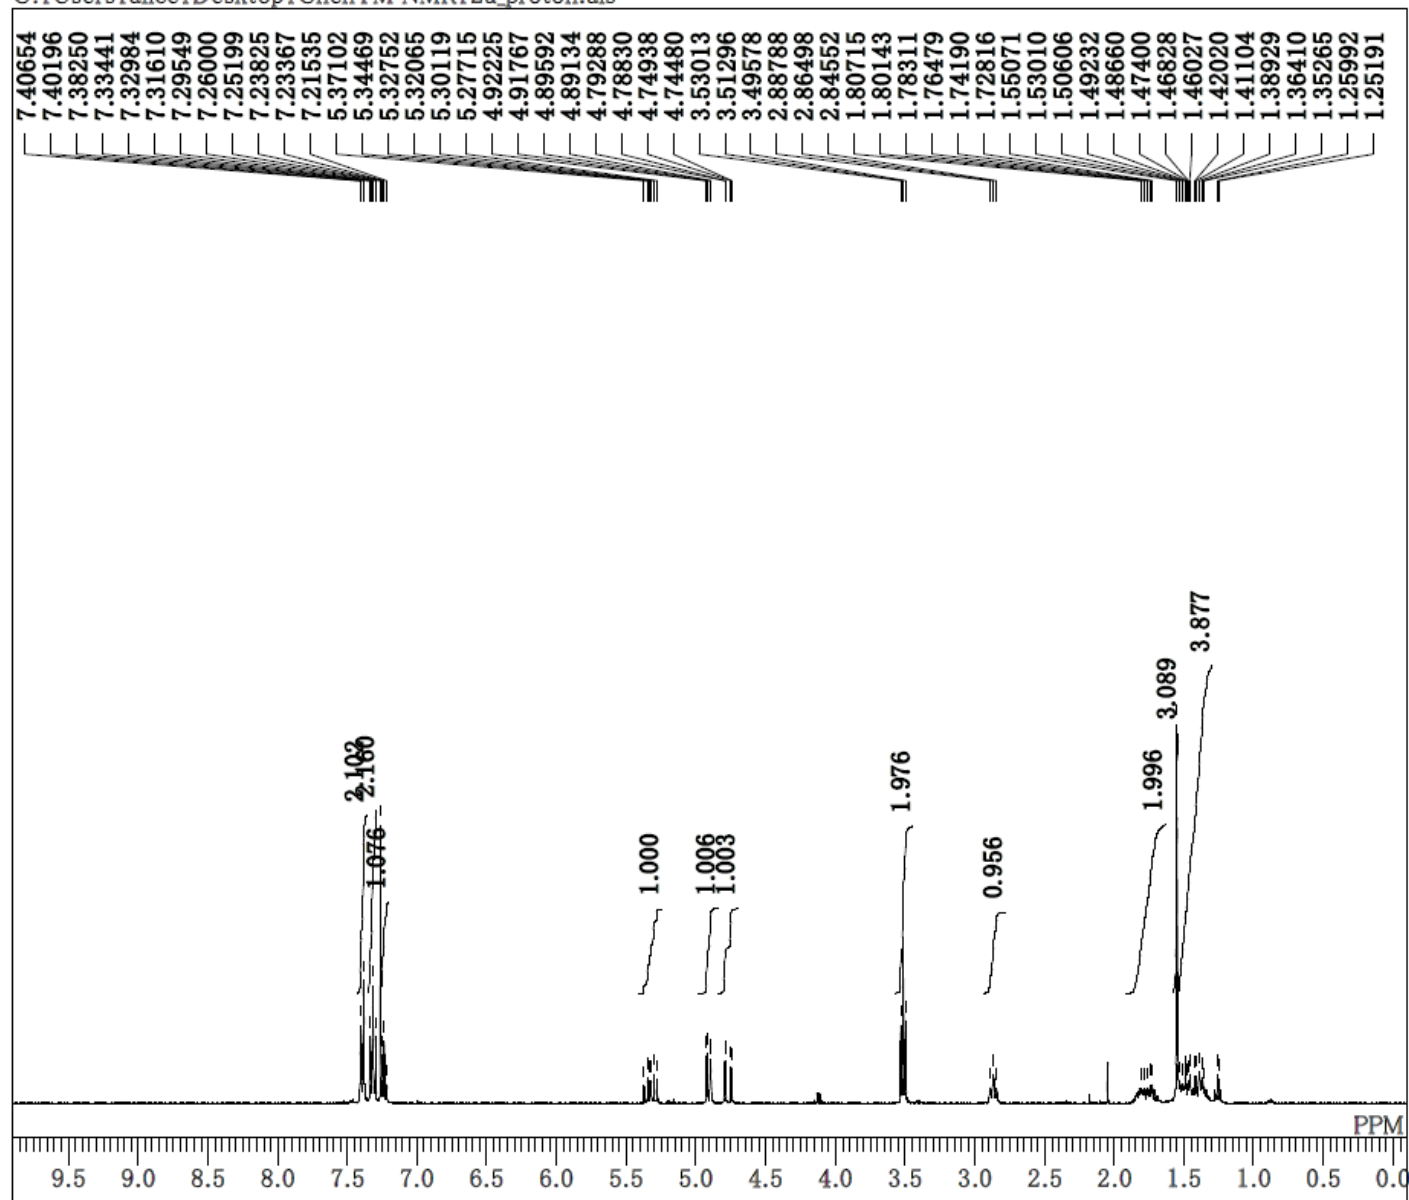

DFILE 2u\_proton.als  
COMNT  
DATIM 09-09-2019 18:24:23  
OBNUC 1H  
EXMOD proton.jxp  
OBFRQ 391.78 MHz  
OBSET 8.51 KHz  
OBFIN 3.34 Hz  
POINT 13107  
FREQU 5878.90 Hz  
SCANS 8  
ACQTM 2.2295 sec  
PD 6.0000 sec  
PW1 5.17 usec  
IRNUC 1H  
CTEMP 21.2 c  
SLVNT CDCL3  
EXREF 7.26 ppm  
BF 0.12 Hz  
RGAIN 46

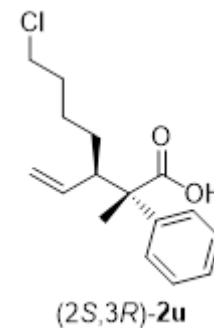

C:\Users\alice\Desktop\ChenTM NMR\2u\_carbon.als

DFILE 2u\_carbon.als  
 COMNT  
 DATIM 09-09-2019 16:15:37  
 OBNUC 13C  
 EXMOD carbon.jpg  
 OBFRQ 98.52 MHz  
 OBSET 4.64 KHz  
 OBFIN 8.74 Hz  
 POINT 26214  
 FREQU 24630.54 Hz  
 SCANS 69  
 ACQTM 1.0643 sec  
 PD 2.0000 sec  
 PW1 3.12 usec  
 IRNUC 1H  
 CTEMP 21.3 c  
 SLVNT CDCL3  
 EXREF 77.00 ppm  
 BF 0.12 Hz  
 RGAIN 60

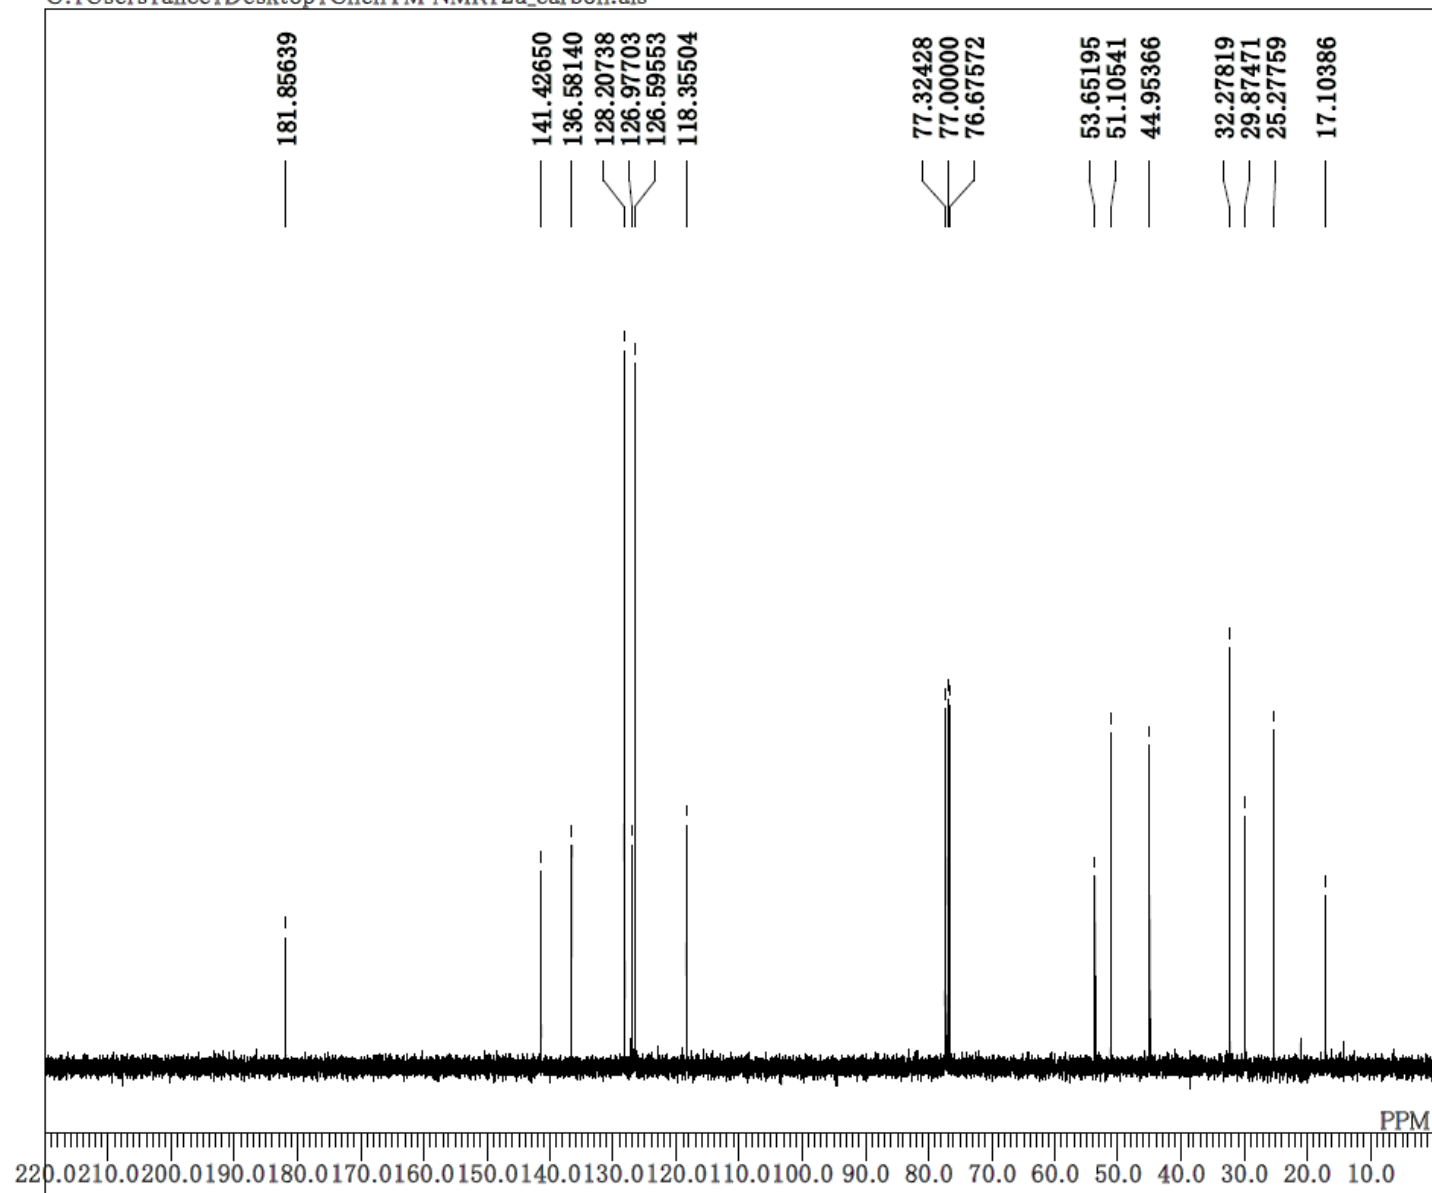



C:\Users\Valice\Desktop\ChenTM NMR\2u'\_proton.als

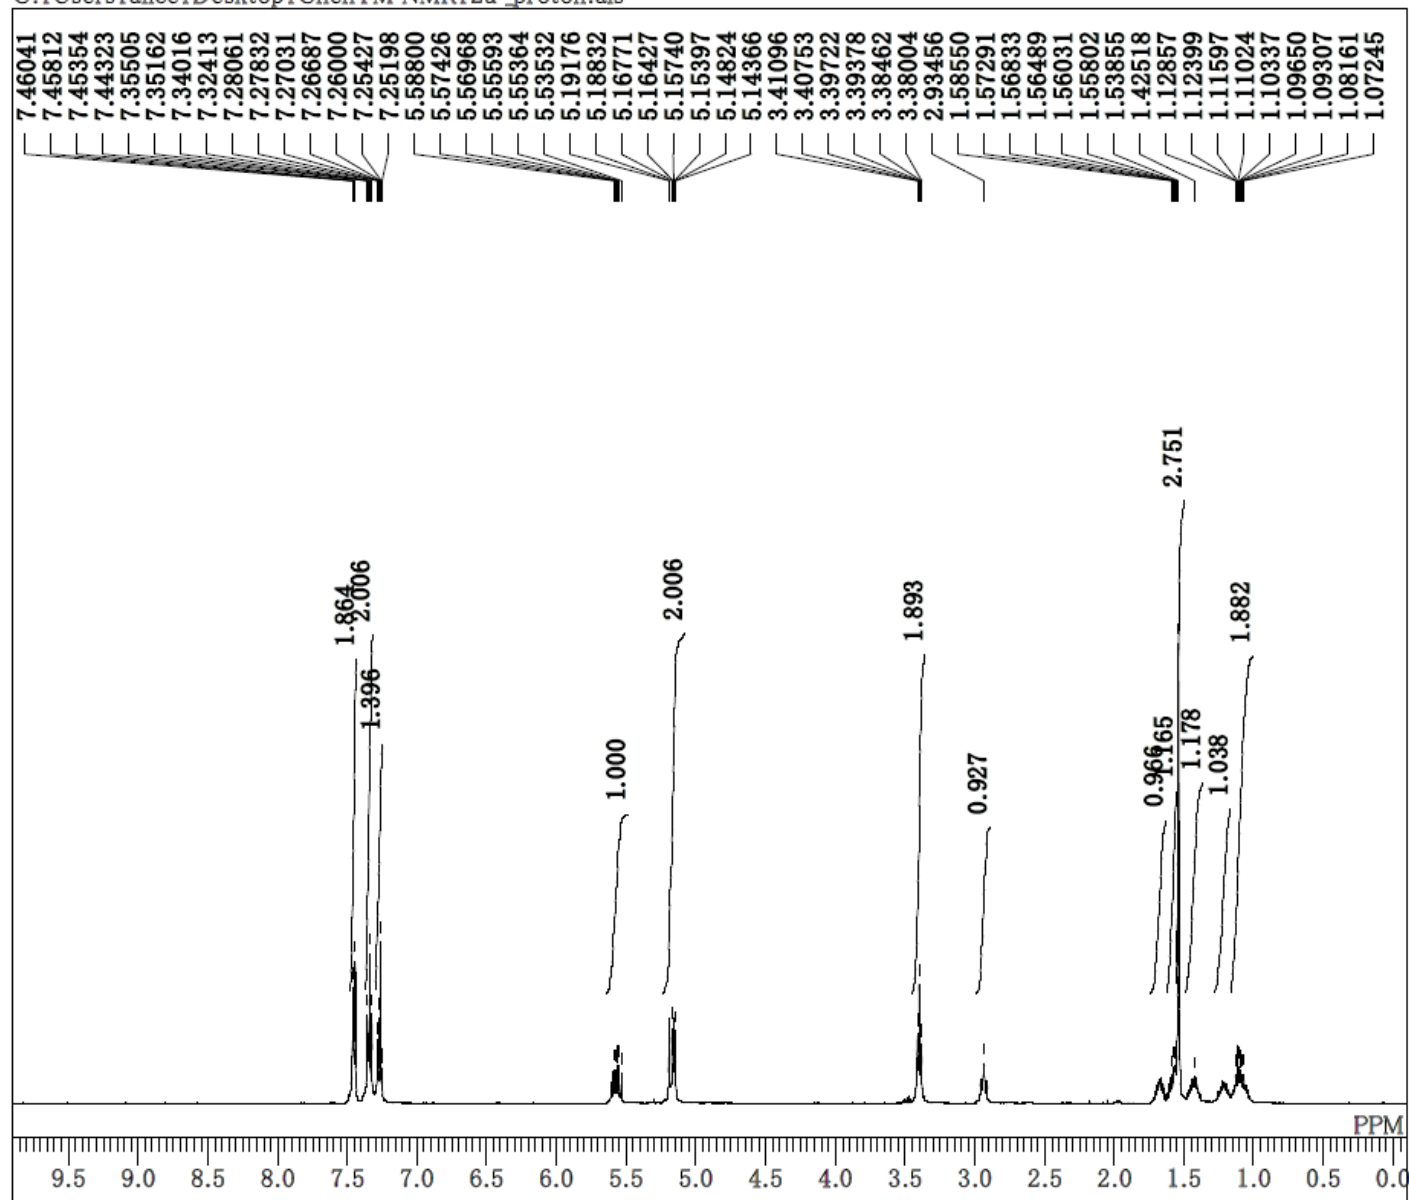

DFILE  
COMNT  
DATIM  
OBNUC  
EXMOD  
OBFRQ  
OBSET  
OBFIN  
POINT  
FREQU  
SCANS  
ACQTM  
PD  
PW1  
IRNUC  
CTEMP  
SLVNT  
EXREF  
BF  
RGAIN

2u'\_proton.als  
2019-11-05 16:05:23  
1H  
proton.jxp  
500.16 MHz  
2.41 KHz  
6.01 Hz  
13107  
7507.51 Hz  
8  
1.7459 sec  
6.0000 sec  
5.55 usec  
1H  
21.7 c  
CDCL3  
7.26 ppm  
0.12 Hz  
40

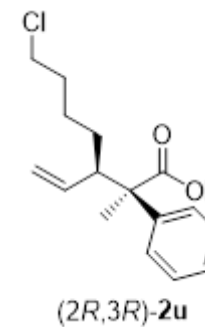

C:\Users\Valice\Desktop\ChenTM NMR\2u'\_carbon.als

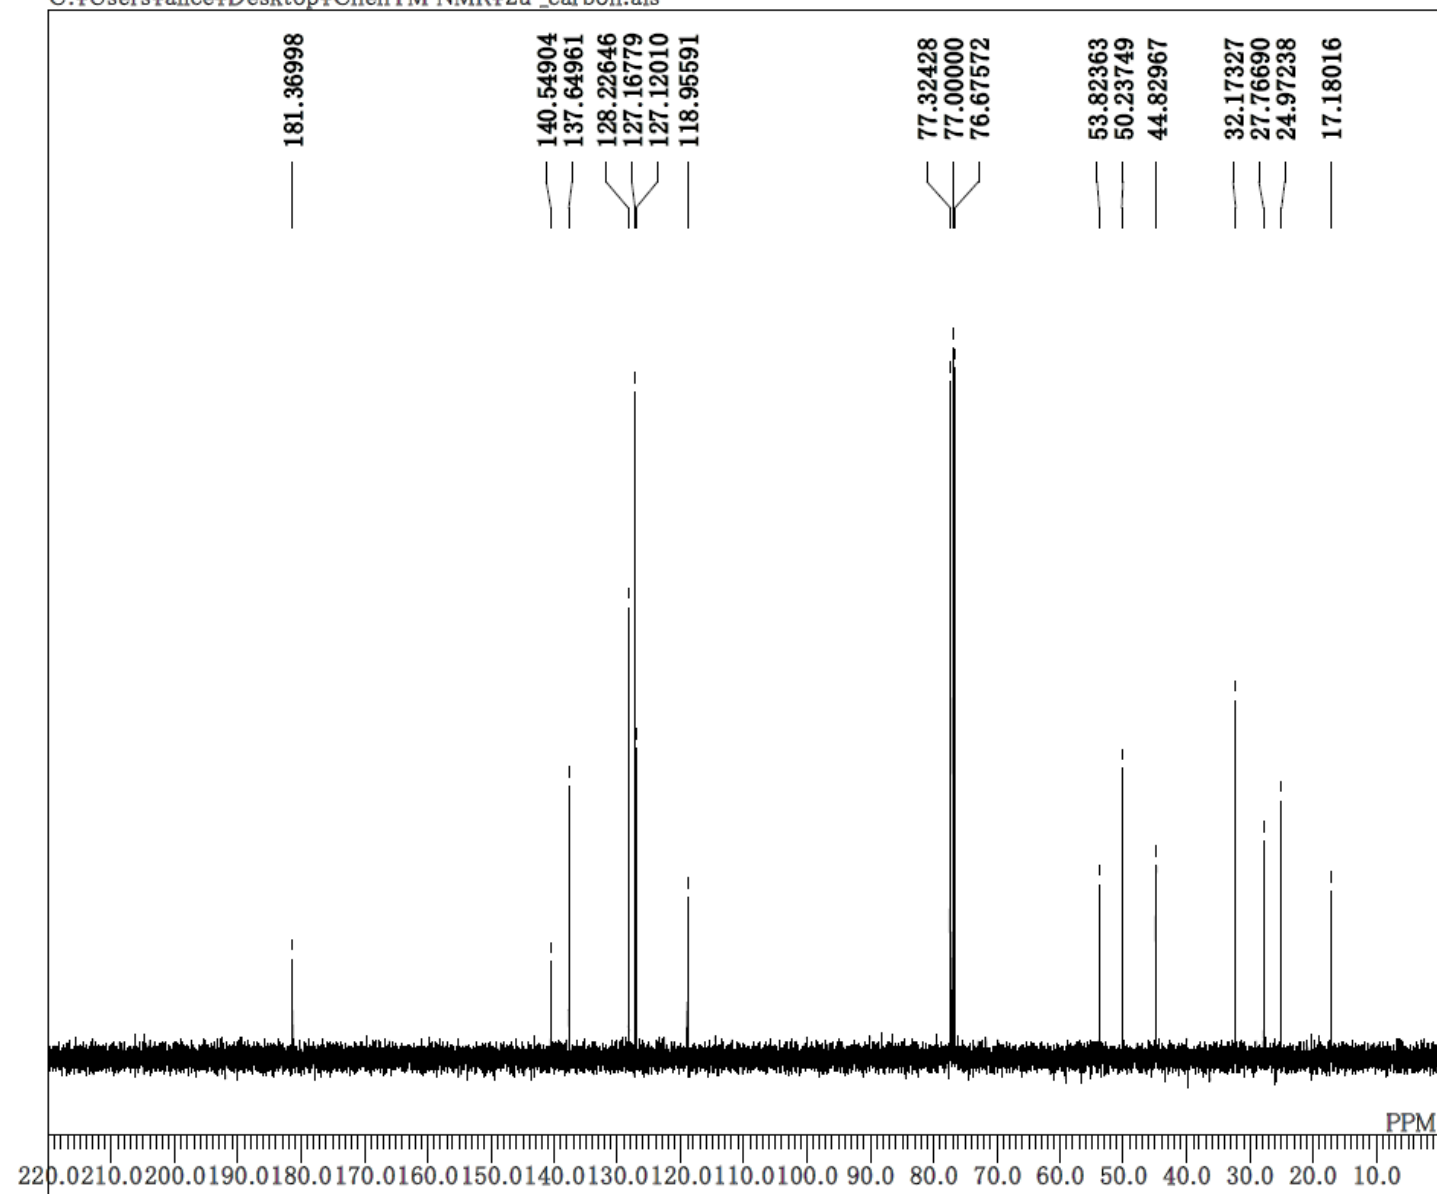

DFILE 2u'\_carbon.als  
 COMNT  
 DATIM 05-11-2019 18:28:49  
 OBNUC 13C  
 EXMOD carbon.jxp  
 OBFRQ 98.52 MHz  
 OBSET 4.64 KHz  
 OBFIN 8.74 Hz  
 POINT 26214  
 FREQU 24630.54 Hz  
 SCANS 104  
 ACQTM 1.0643 sec  
 PD 2.0000 sec  
 PW1 3.12 usec  
 IRNUC 1H  
 CTEMP 21.0 c  
 SLVNT CDCL3  
 EXREF 77.00 ppm  
 BF 0.12 Hz  
 RGAIN 60

C:\Users\Valice\Desktop\ChenTM NMR\2v\_proton.als

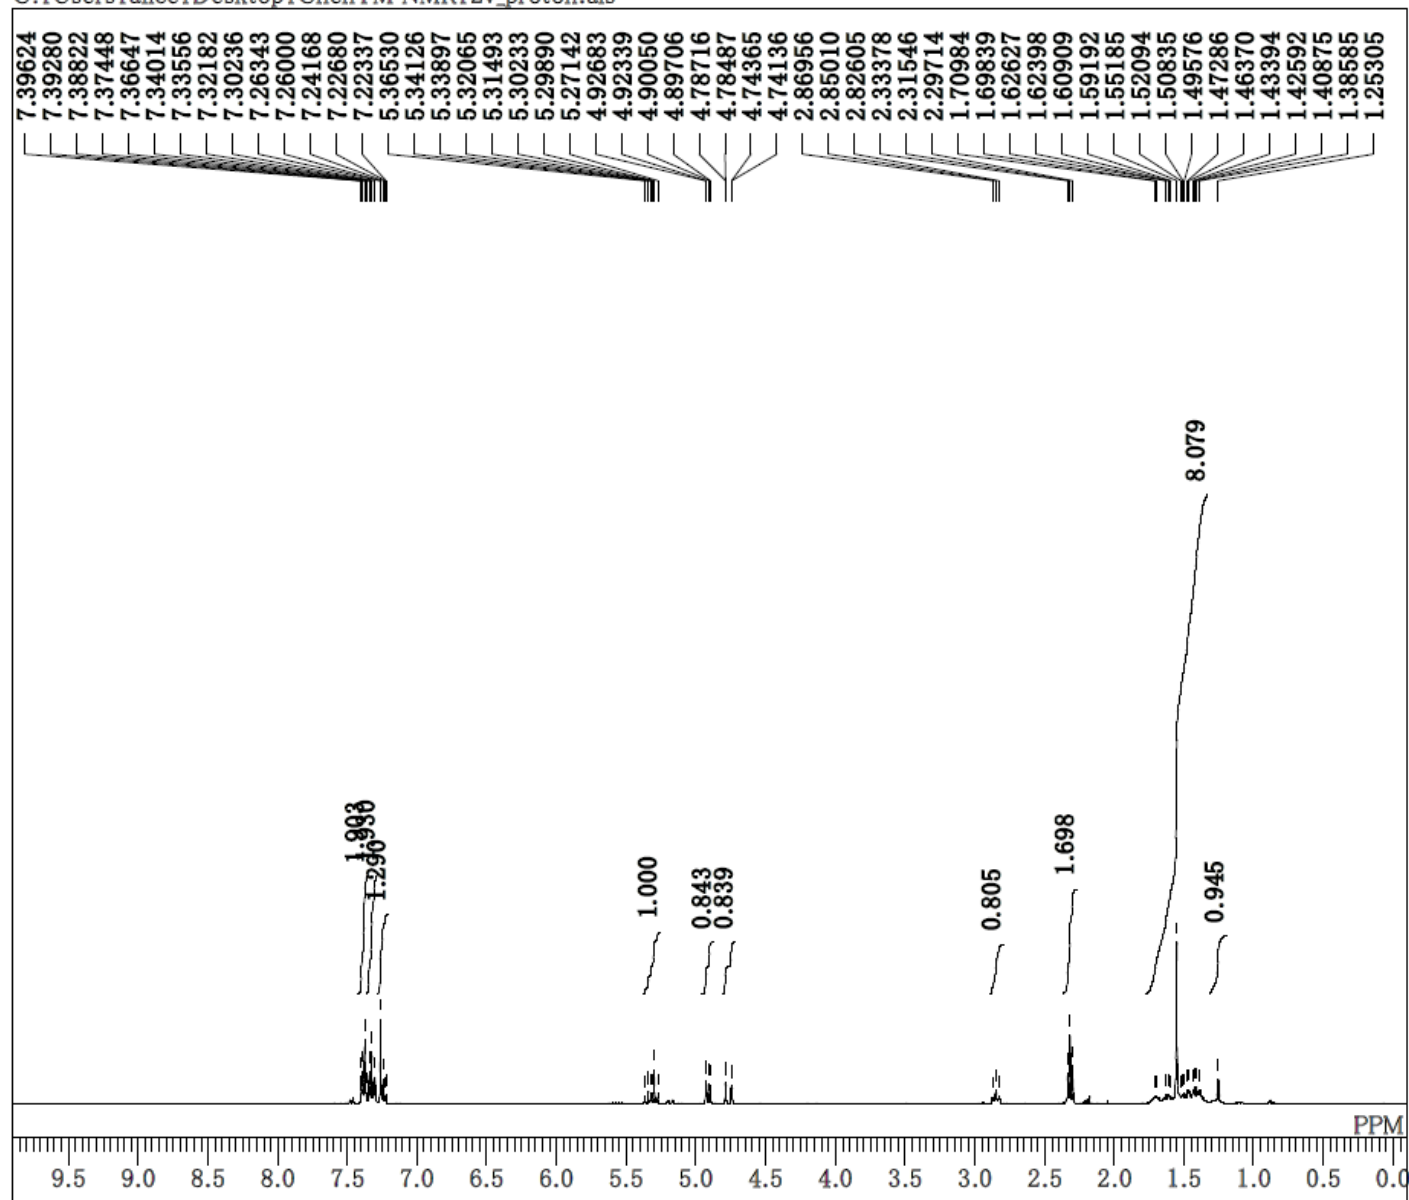

DFILE 2v\_proton.als  
 COMNT  
 DATIM 07-03-2020 16:22:55  
 OBNUC 1H  
 EXMOD proton.jxp  
 OBFRQ 391.78 MHz  
 OBSET 8.51 KHz  
 OBFIN 3.34 Hz  
 POINT 13107  
 FREQU 5878.90 Hz  
 SCANS 8  
 ACQTM 2.2295 sec  
 PD 6.0000 sec  
 PW1 5.17 usec  
 IRNUC 1H  
 CTEMP 20.3 c  
 SLVNT CDCL3  
 EXREF 7.26 ppm  
 BF 0.12 Hz  
 RGAIN 40

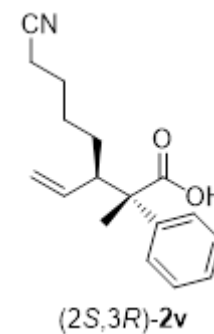

C:\Users\alice\Desktop\ChenTM NMR\2v\_carbon.als

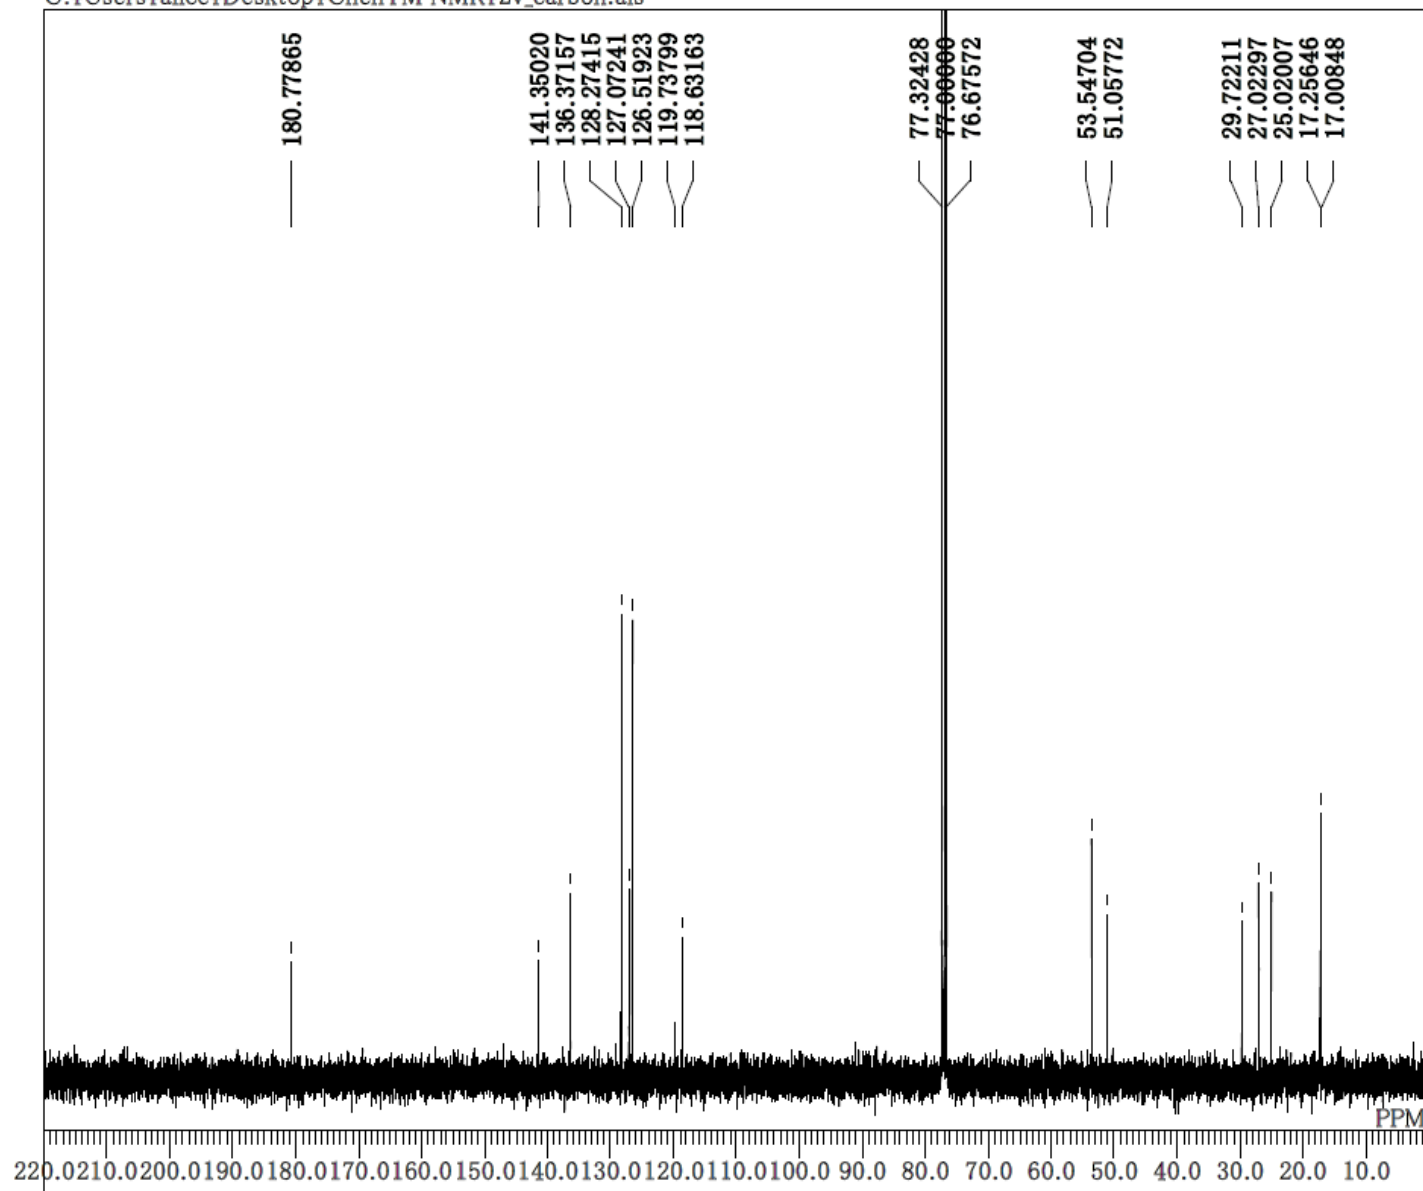

DFILE 2v\_carbon.als  
 COMNT  
 DATIM 07-03-2020 17:41:12  
 OBNUC 13C  
 EXMOD carbon.jpg  
 OBFRQ 98.52 MHz  
 OBSET 4.64 KHz  
 OBFIN 8.74 Hz  
 POINT 26214  
 FREQU 24630.54 Hz  
 SCANS 682  
 ACQTM 1.0643 sec  
 PD 2.0000 sec  
 PW1 3.12 usec  
 IRNUC 1H  
 CTEMP 20.5 c  
 SLVNT CDCL3  
 EXREF 77.00 ppm  
 BF 0.12 Hz  
 RGAIN 60

C:\Users\alice\Desktop\ChenTM NMR\2v'\_proton.als

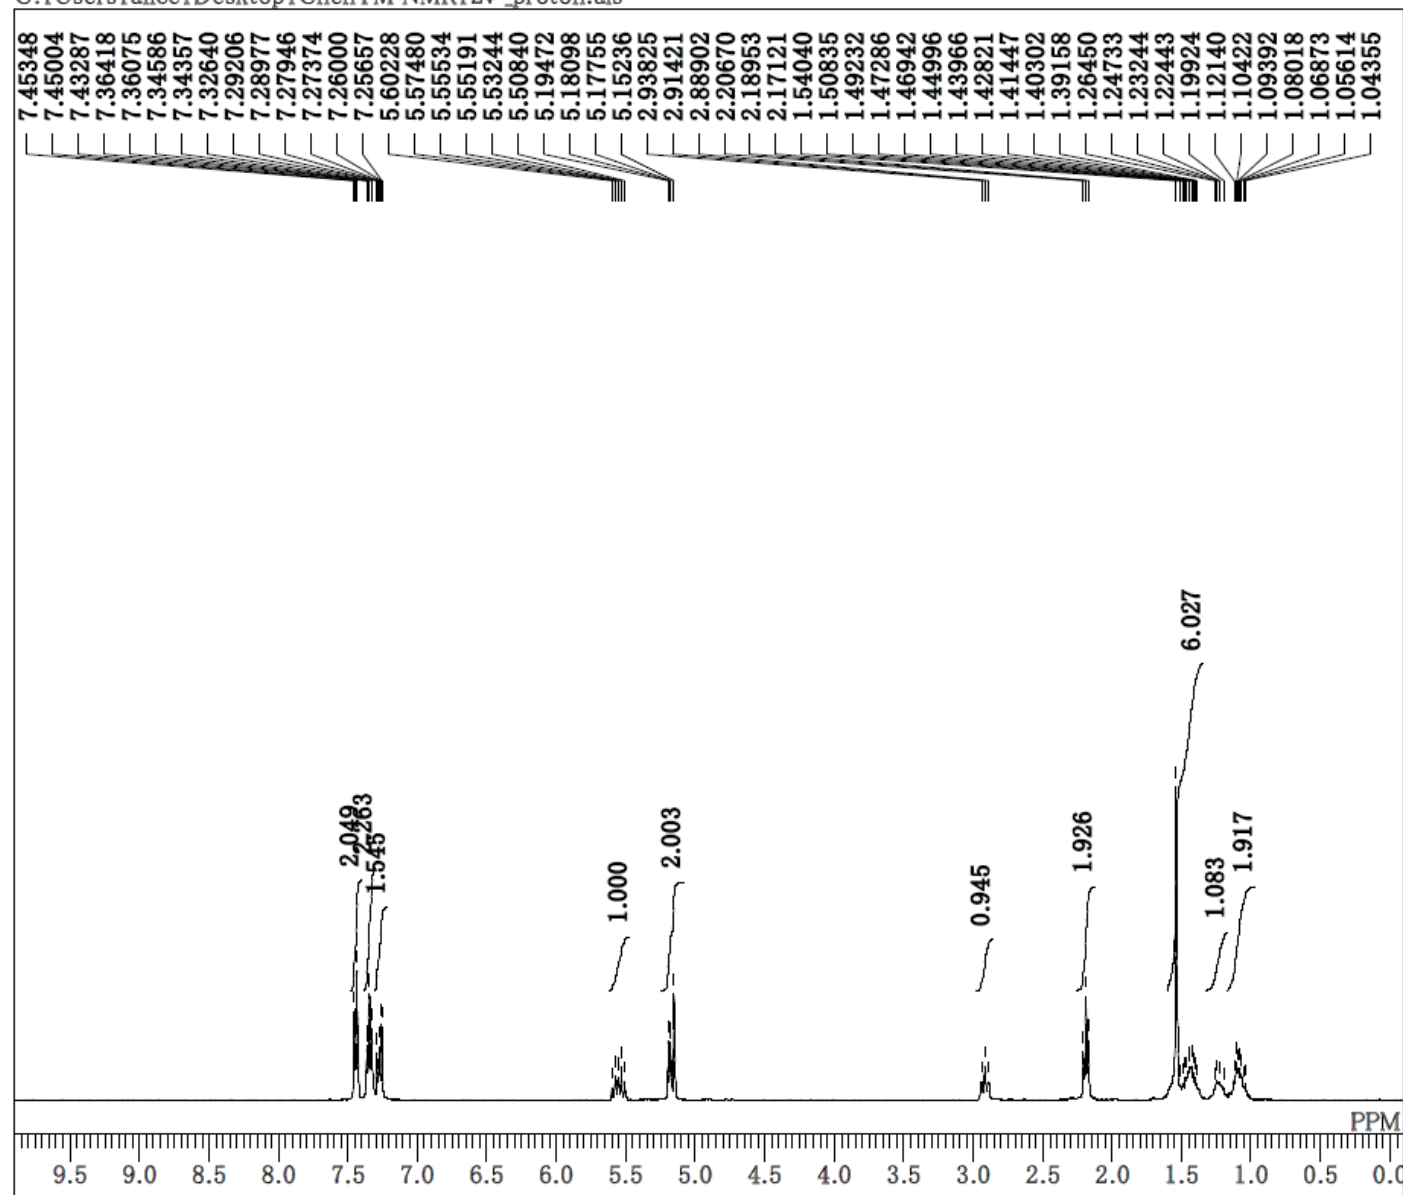

DFILE 2v'\_proton.als  
 COMNT  
 DATIM 24-01-2020 12:21:27  
 OBNUC 1H  
 EXMOD proton.jxp  
 OBFRQ 391.78 MHz  
 OBSET 8.51 KHz  
 OBFIN 3.34 Hz  
 POINT 13107  
 FREQU 5878.90 Hz  
 SCANS 8  
 ACQTM 2.2295 sec  
 PD 6.0000 sec  
 PW1 5.17 usec  
 IRNUC 1H  
 CTEMP 20.0 c  
 SLVNT CDCL3  
 EXREF 7.26 ppm  
 BF 0.12 Hz  
 RGAIN 40

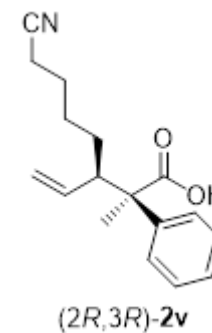

C:\Users\alice\Desktop\ChenTM NMR\2v'\_carbon.als

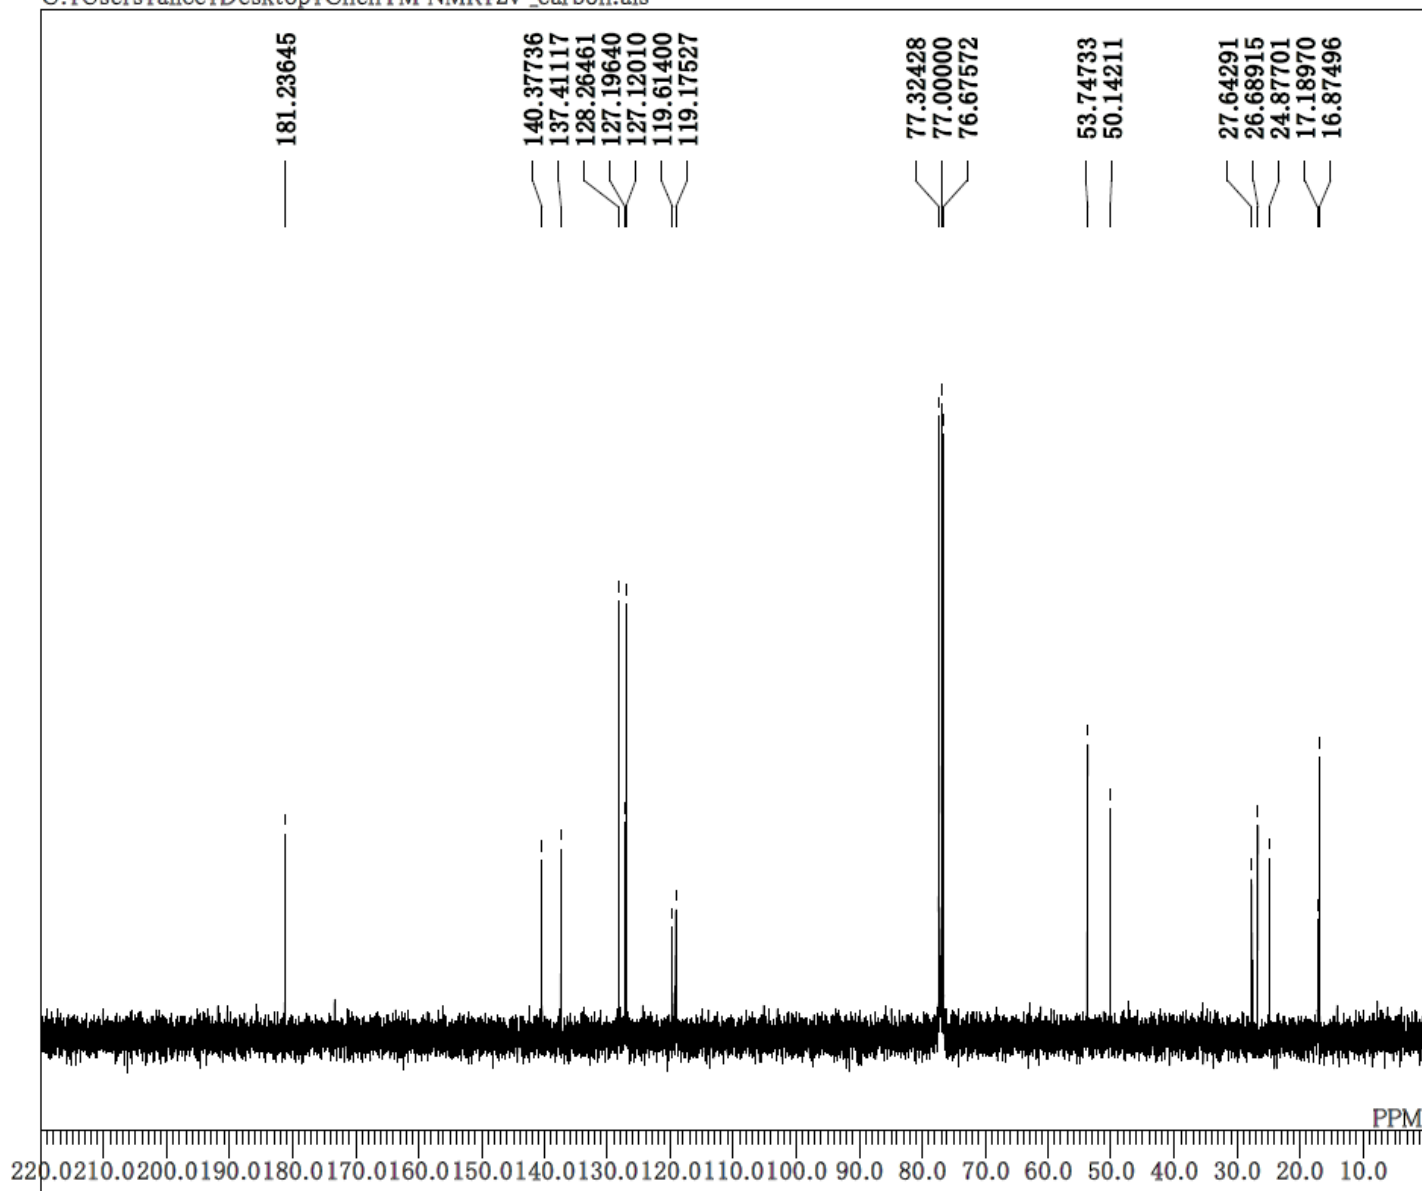

2v'\_carbon.als

|       |                     |
|-------|---------------------|
| DFILE | 24-01-2020 12:27:01 |
| COMNT | 13C                 |
| DATIM | carbon.jpg          |
| OBNUC | 98.52 MHz           |
| EXMOD | 4.64 KHz            |
| OBFRQ | 8.74 Hz             |
| OBSET | 26214               |
| OBFIN | 24630.54 Hz         |
| POINT | 102                 |
| FREQU | 1.0643 sec          |
| SCANS | 2.0000 sec          |
| ACQTM | 3.12 usec           |
| PD    | 1H                  |
| PW1   | 20.4 c              |
| IRNUC | CDCL3               |
| CTEMP | 77.00 ppm           |
| SLVNT | 0.12 Hz             |
| EXREF | 60                  |
| BF    |                     |
| RGAIN |                     |

C:\Users\valice\Desktop\Chen\TM NMR\2w\_proton.als

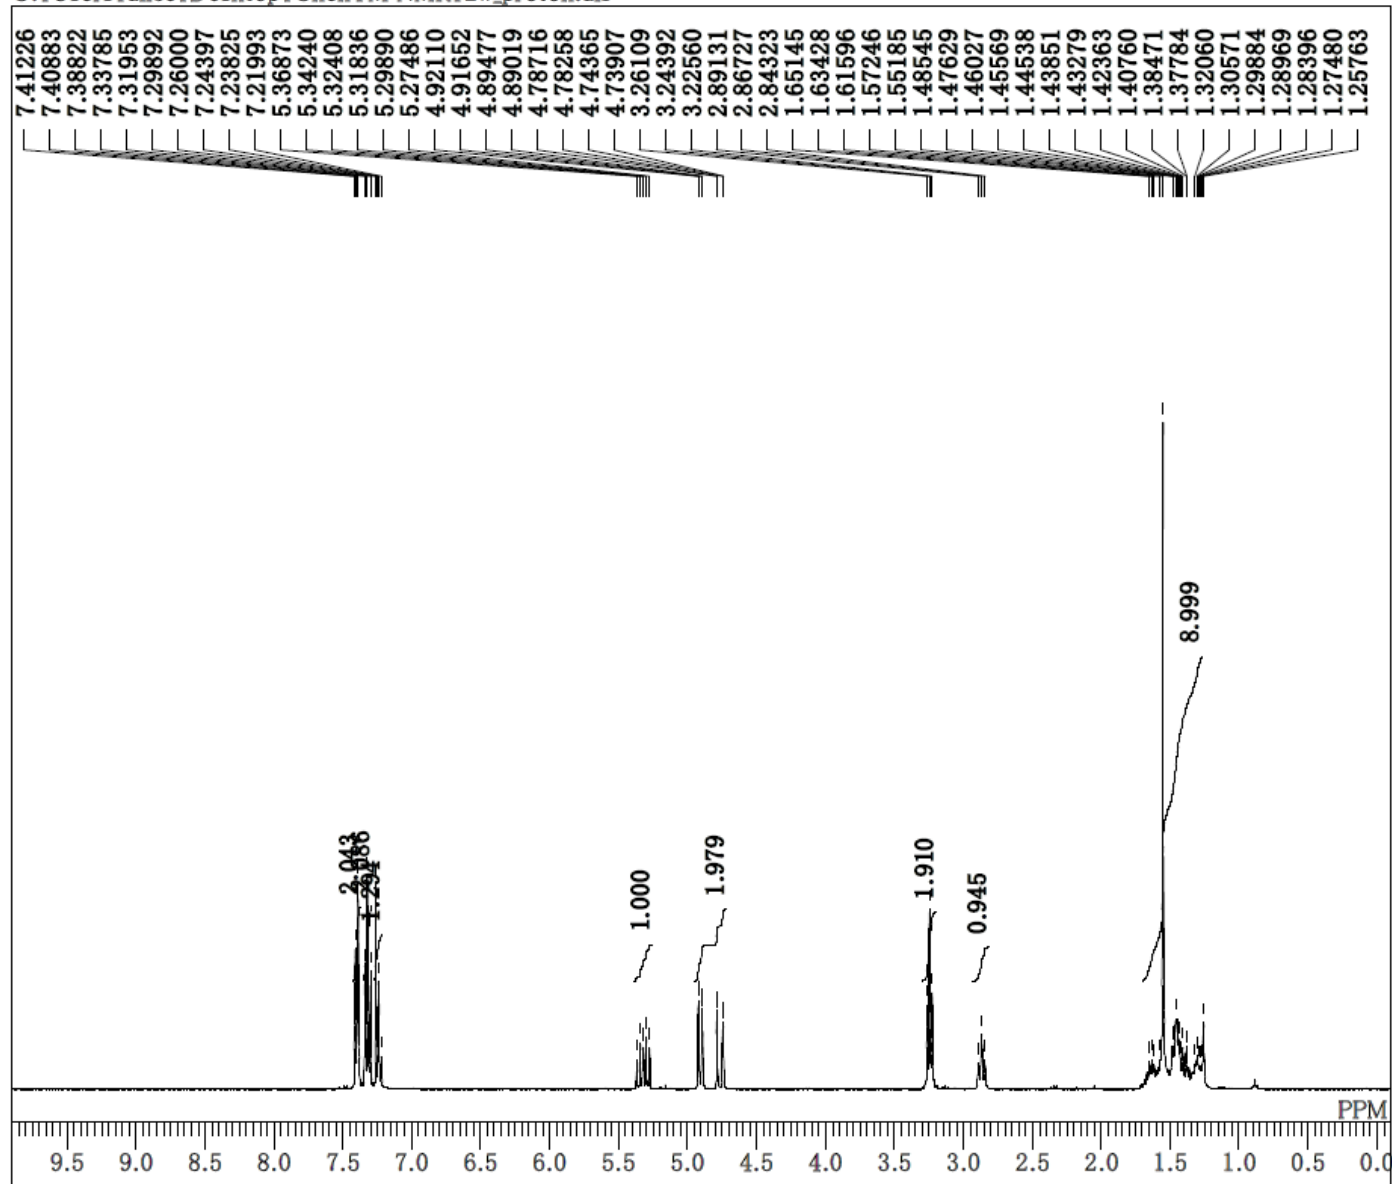

DFILE 2w\_proton.als  
 COMNT 26-11-2019 19:40:58  
 DATIM 1H  
 OBNUC proton.jxp  
 EXMOD 391.78 MHz  
 OBFRQ 8.51 KHz  
 OBSET 3.34 Hz  
 OBFIN 13107  
 POINT 5878.90 Hz  
 FREQU 8  
 SCANS 2.2295 sec  
 ACQTM 6.0000 sec  
 PD 5.17 usec  
 PW1 1H  
 IRNUC 20.3 c  
 CTEMP CDCL3  
 SLVNT 7.26 ppm  
 EXREF 0.12 Hz  
 BF 36  
 RGAIN

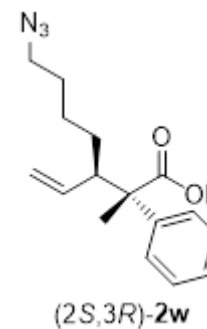

C:\Users\Valice\Desktop\ChenTM NMR\2w\_carbon.als

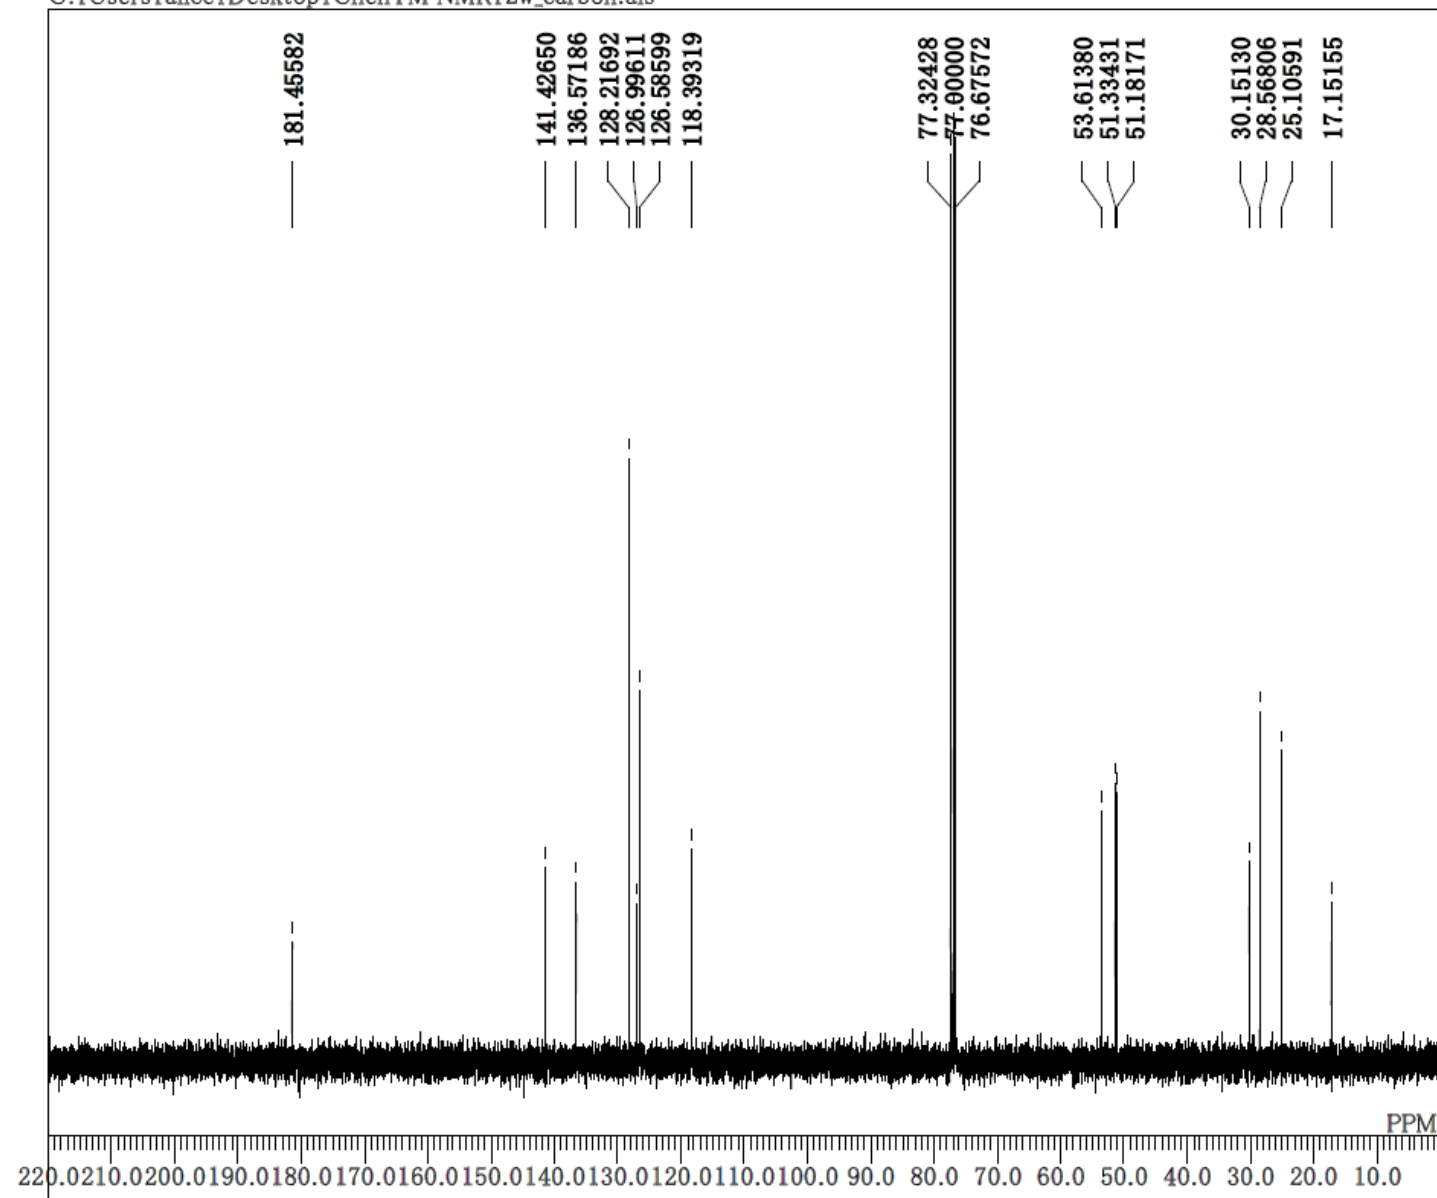

DFILE 2w\_carbon.als  
 COMNT  
 DATIM 26-11-2019 20:06:03  
 OBNUC 13C  
 EXMOD carbon.jpg  
 OBFRQ 98.52 MHz  
 OBSET 4.64 KHz  
 OBFIN 8.74 Hz  
 POINT 26214  
 FREQU 24630.54 Hz  
 SCANS 108  
 ACQTM 1.0643 sec  
 PD 2.0000 sec  
 PW1 3.12 usec  
 IRNUC 1H  
 CTEMP 20.4 c  
 SLVNT CDCL3  
 EXREF 77.00 ppm  
 BF 0.12 Hz  
 RGAIN 60



C:\Users\valice\Desktop\ChenTM NMR\2w'\_proton.als

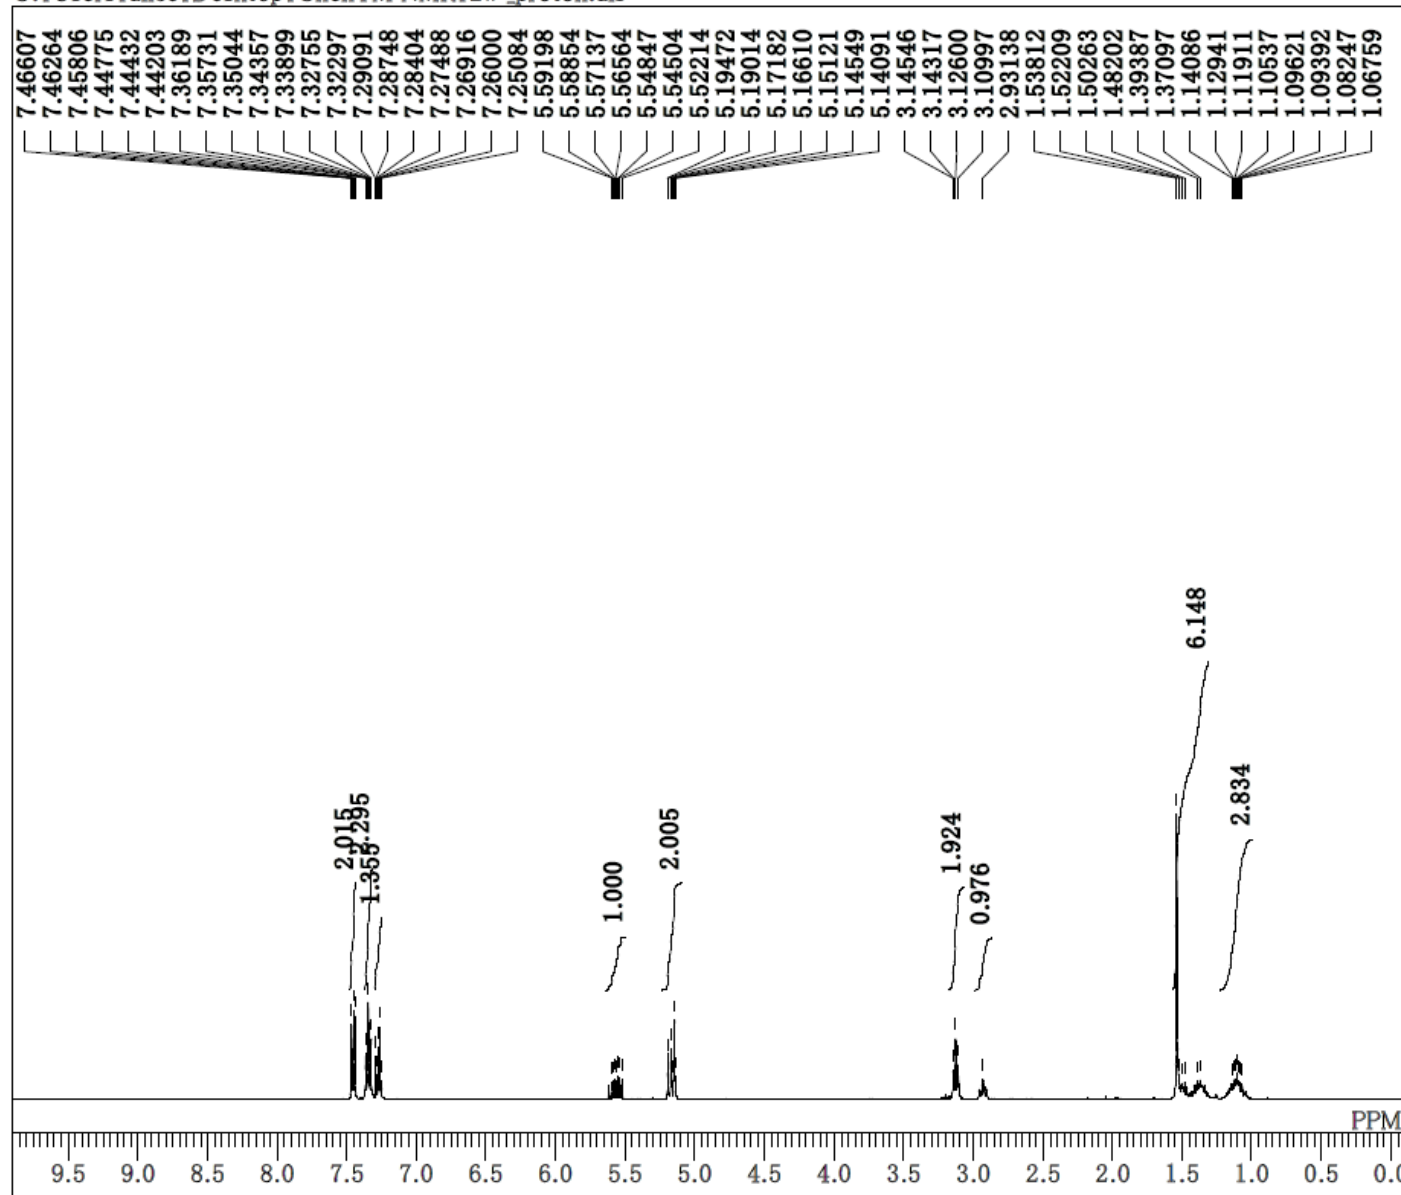

DFILE 2w'\_proton.als  
 COMNT  
 DATIM 26-11-2019 19:12:37  
 OBNUC 1H  
 EXMOD proton.jxp  
 OBFRQ 391.78 MHz  
 OBSET 8.51 KHz  
 OBFIN 3.34 Hz  
 POINT 13107  
 FREQU 5878.90 Hz  
 SCANS 8  
 ACQTM 2.2295 sec  
 PD 6.0000 sec  
 PW1 5.17 usec  
 IRNUC 1H  
 CTEMP 20.2 c  
 SLVNT CDCL3  
 EXREF 7.26 ppm  
 BF 0.12 Hz  
 RGAIN 36

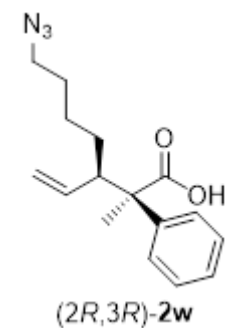

C:\Users\alice\Desktop\ChenTM NMR\2w'\_carbon.als

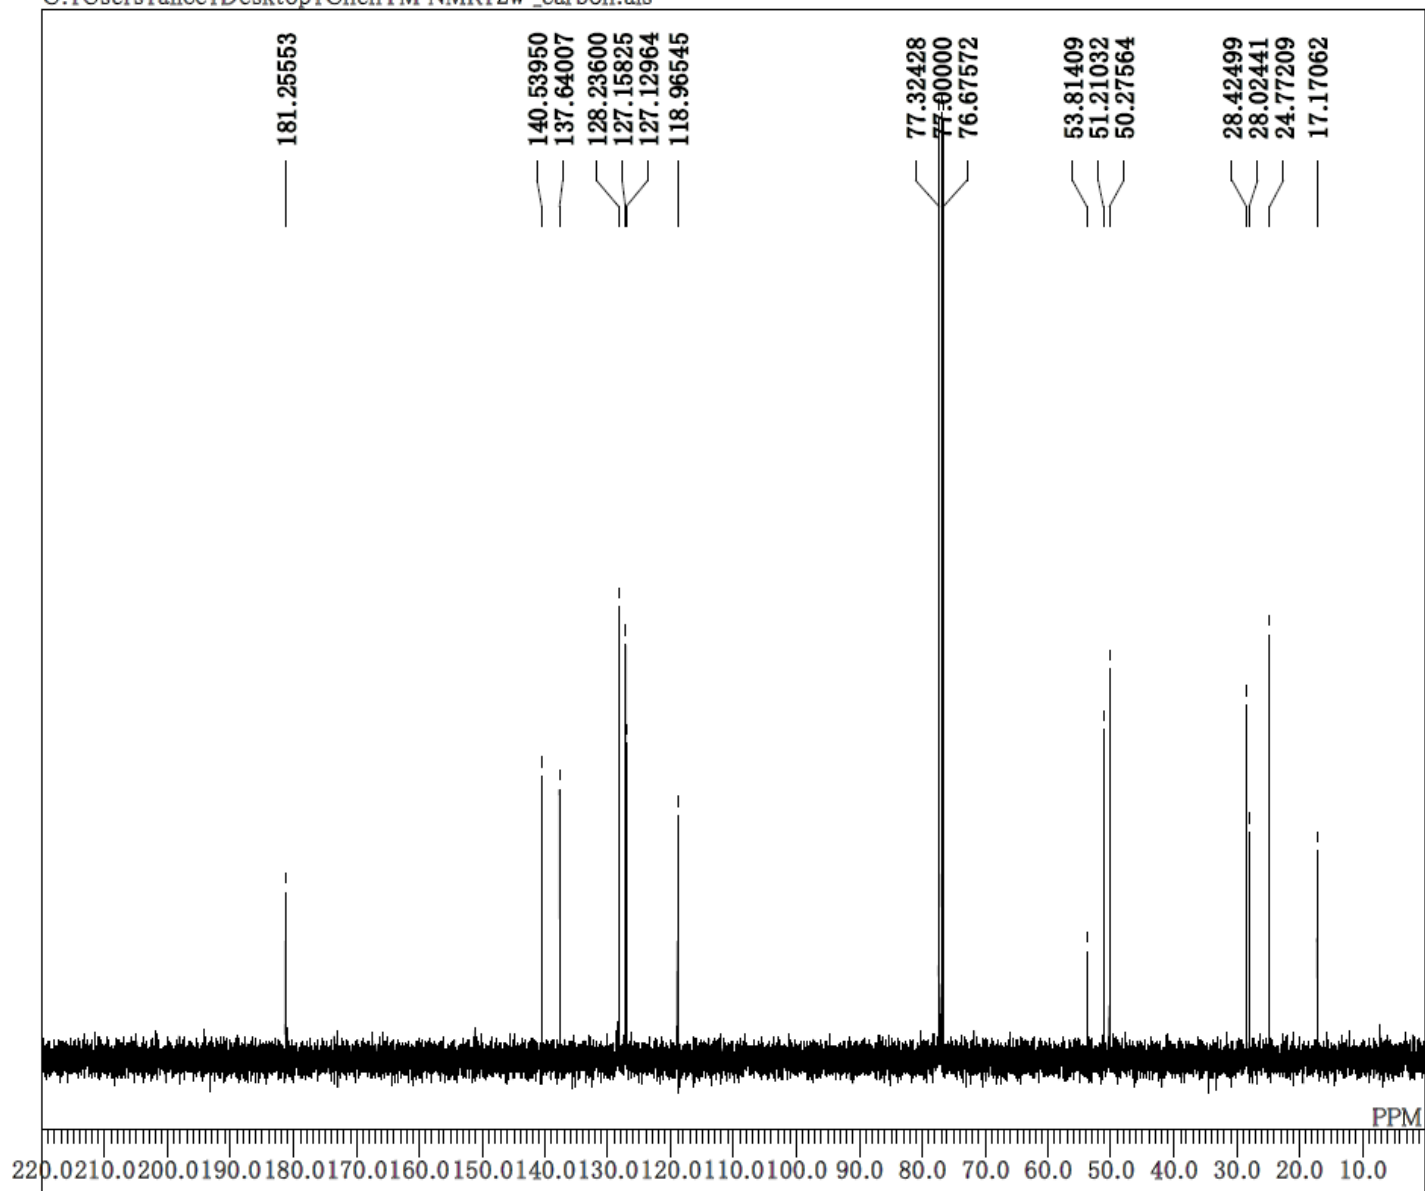

DFILE 2w'\_carbon.als  
COMNT  
DATIM 26-11-2019 19:46:01  
OBNUC 13C  
EXMOD carbon.jpg  
OBFRQ 98.52 MHz  
OBSET 4.64 KHz  
OBFIN 8.74 Hz  
POINT 26214  
FREQU 24630.54 Hz  
SCANS 108  
ACQTM 1.0643 sec  
PD 2.0000 sec  
PW1 3.12 usec  
IRNUC 1H  
CTEMP 20.4 c  
SLVNT CDCL3  
EXREF 77.00 ppm  
BF 0.12 Hz  
RGAIN 60

C:\Users\alice\Desktop\ChenTM NMR\2x\_proton.als

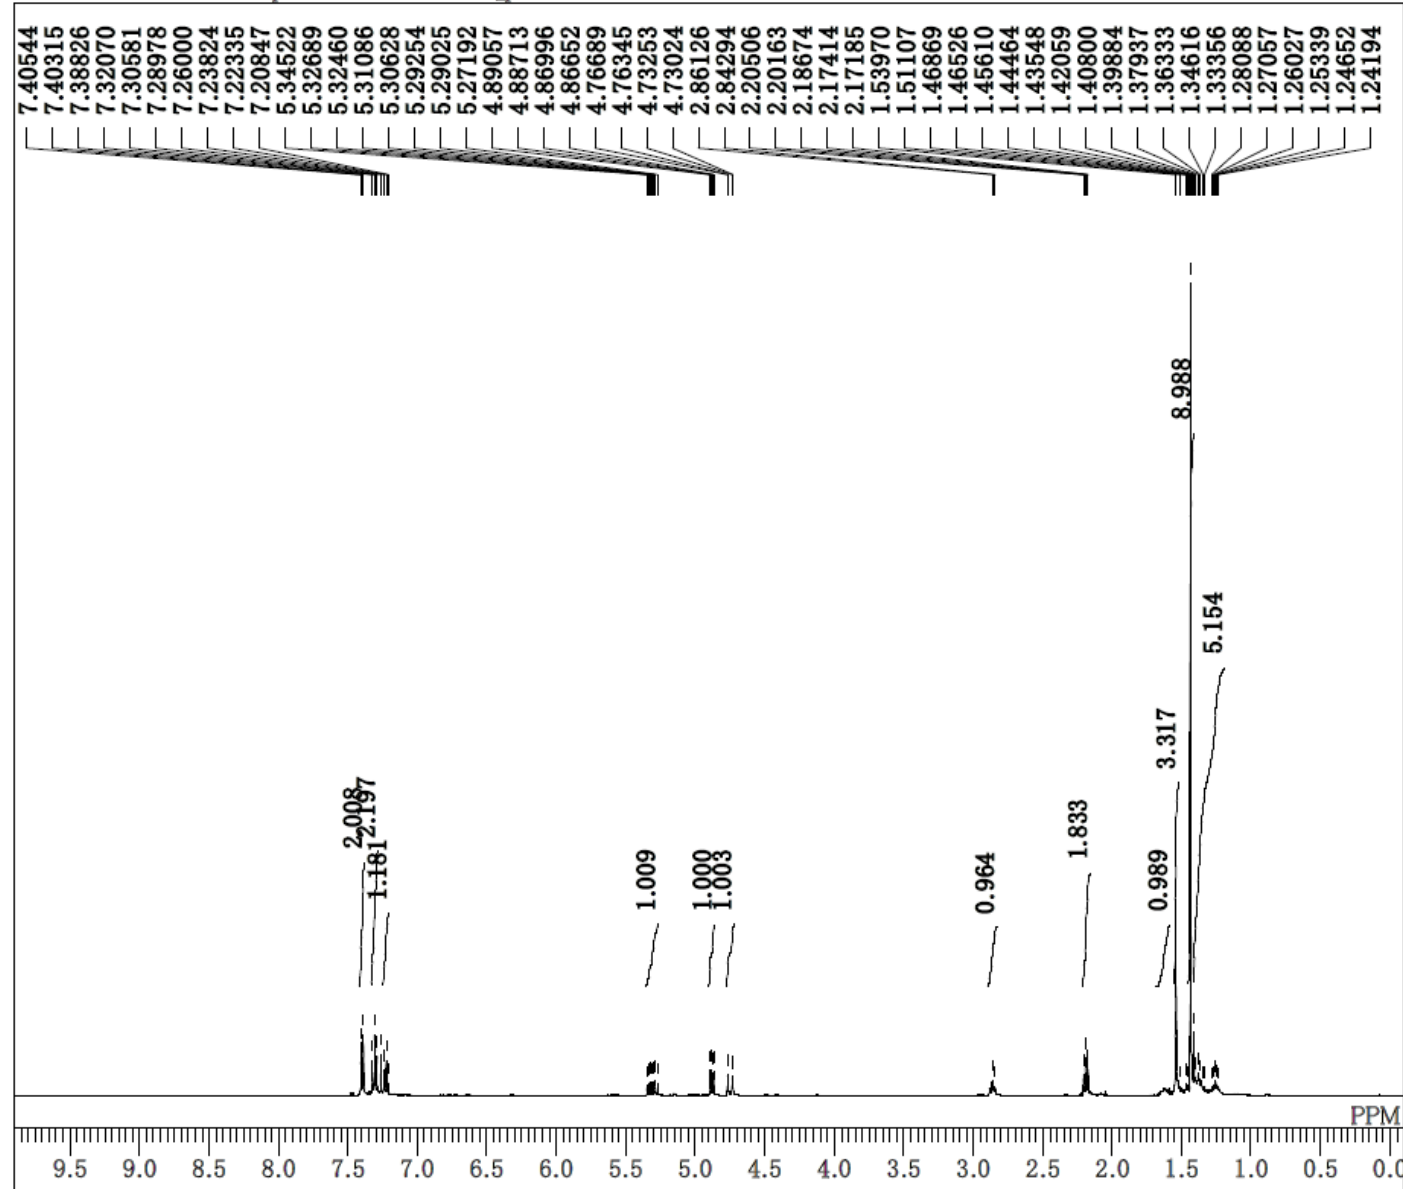

DFILE  
COMNT  
DATIM  
OBNUC  
EXMOD  
OBFRQ  
OBSET  
OBFIN  
POINT  
FREQU  
SCANS  
ACQTM  
PD  
PW1  
IRNUC  
CTEMP  
SLVNT  
EXREF  
BF  
RGAIN

2x\_proton.als  
2019-11-20 01:26:58  
1H  
proton.jxp  
500.16 MHz  
2.41 KHz  
6.01 Hz  
13107  
7507.51 Hz  
8  
1.7459 sec  
6.0000 sec  
5.55 usec  
1H  
21.6 c  
CDCL3  
7.26 ppm  
0.12 Hz  
40

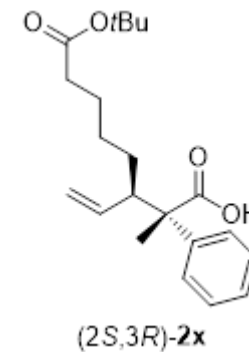

C:\Users\Valice\Desktop\ChenTM NMR\2x\_carbon.als

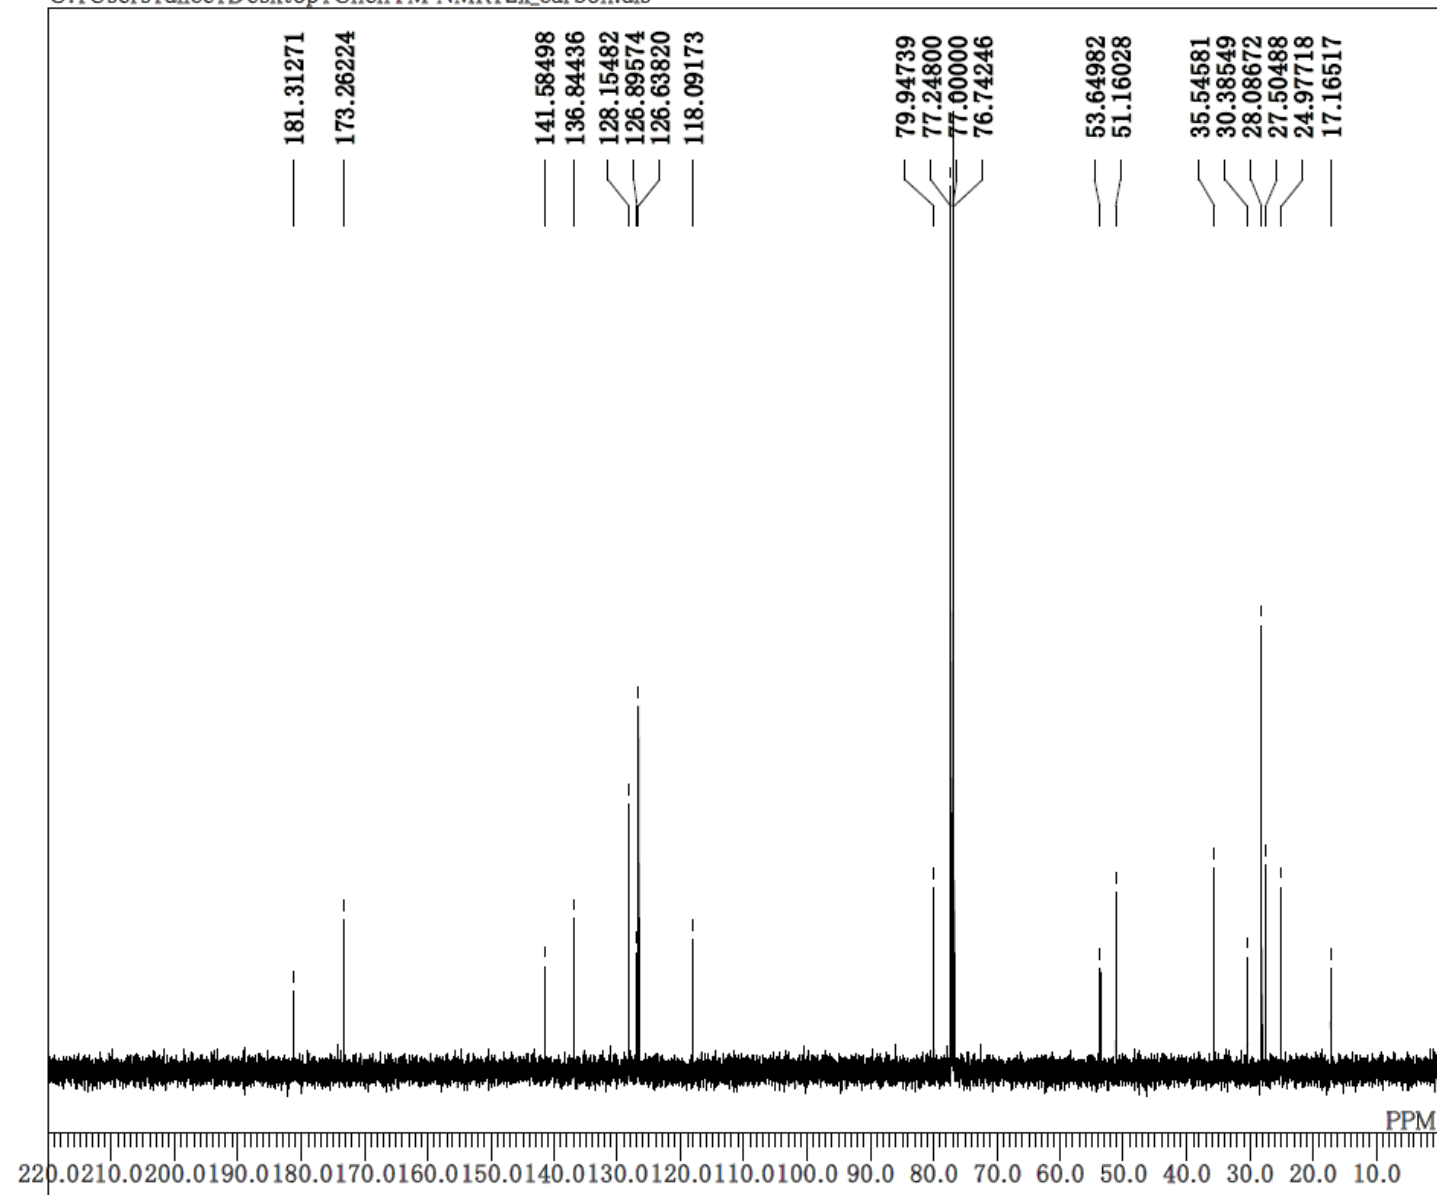

DFILE 2x\_carbon.als  
 COMNT  
 DATIM 2019-11-20 01:31:50  
 OBNUC 13C  
 EXMOD carbon.jpg  
 OBFRQ 125.77 MHz  
 OBSET 7.87 KHz  
 OBFIN 4.21 Hz  
 POINT 26214  
 FREQU 31446.54 Hz  
 SCANS 187  
 ACQTM 0.8336 sec  
 PD 2.0000 sec  
 PW1 3.40 usec  
 IRNUC 1H  
 CTEMP 21.9 c  
 SLVNT CDCL3  
 EXREF 77.00 ppm  
 BF 0.12 Hz  
 RGAIN 60

C:\Users\alice\Desktop\ChenTM NMR\2x'\_proton.als

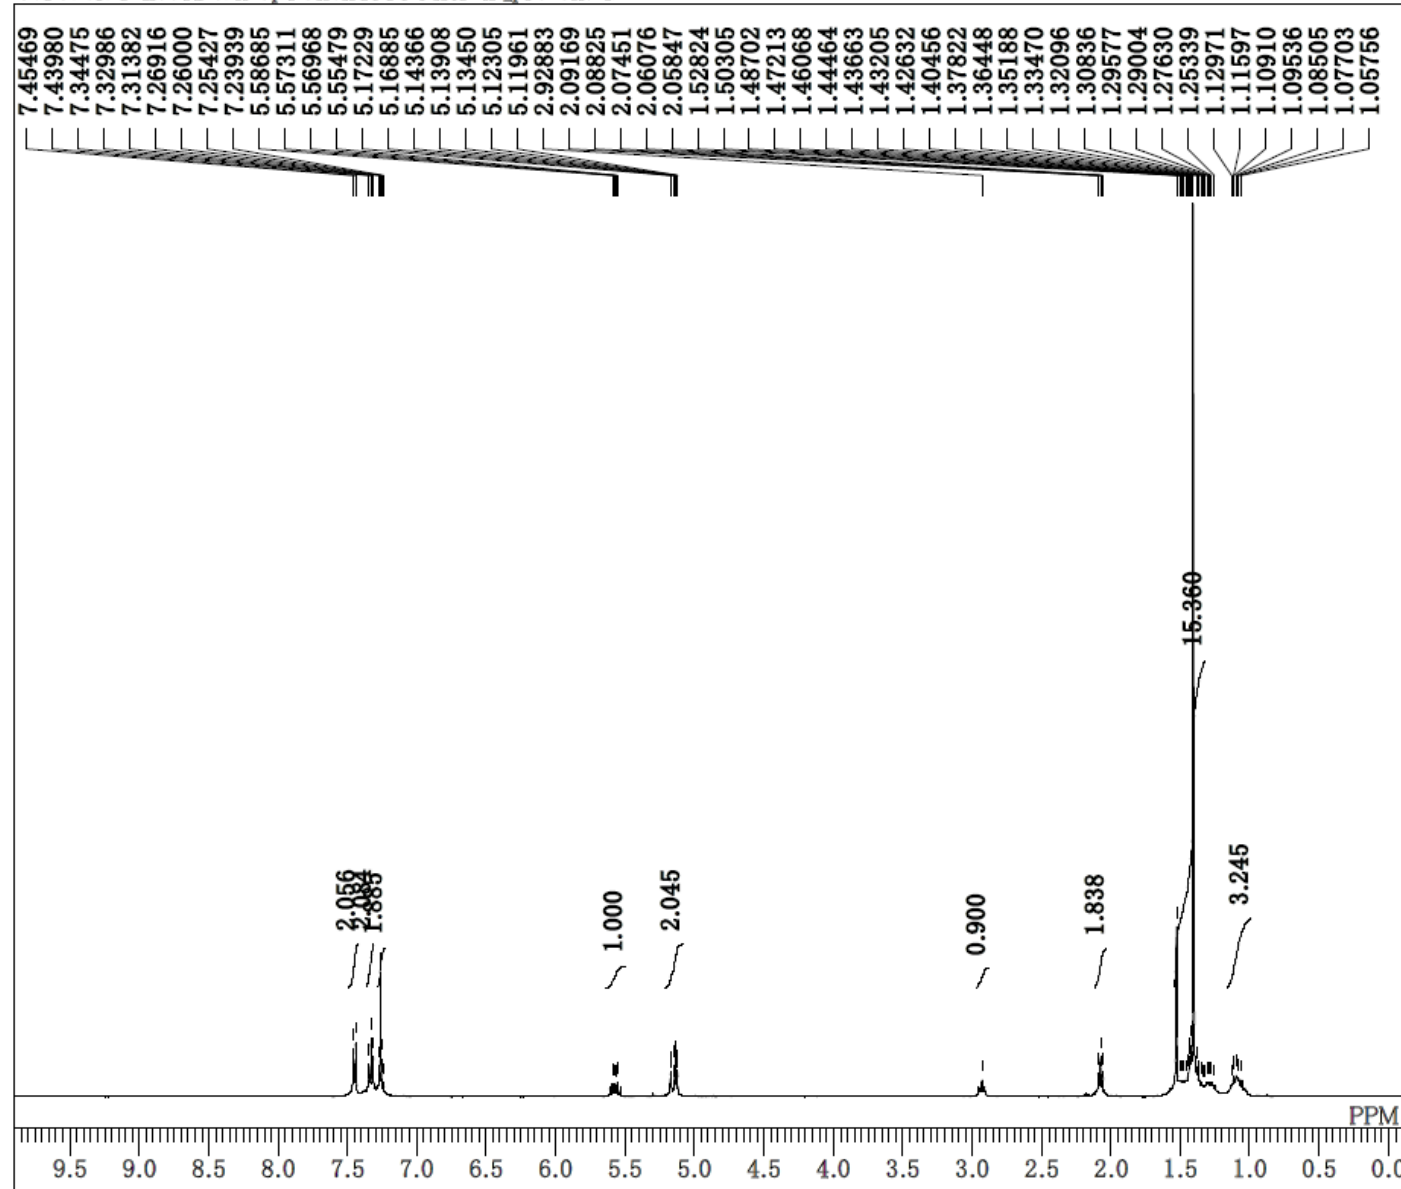

DFILE 2x'\_proton.als  
 COMNT  
 DATIM 2019-12-07 11:19:16  
 OBNUC 1H  
 EXMOD proton.jxp  
 OBFRQ 500.16 MHz  
 OBSET 2.41 KHz  
 OBFIN 6.01 Hz  
 POINT 13107  
 FREQU 7507.51 Hz  
 SCANS 8  
 ACQTM 1.7459 sec  
 PD 6.0000 sec  
 PW1 5.55 usec  
 IRNUC 1H  
 CTEMP 21.3 c  
 SLVNT CDCL3  
 EXREF 7.26 ppm  
 BF 0.12 Hz  
 RGAIN 42

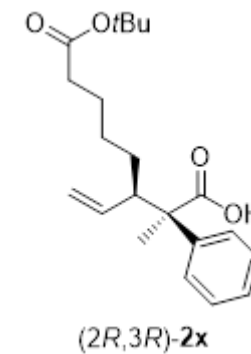

C:\Users\alice\Desktop\ChenTM NMR\2x'\_carbon.als

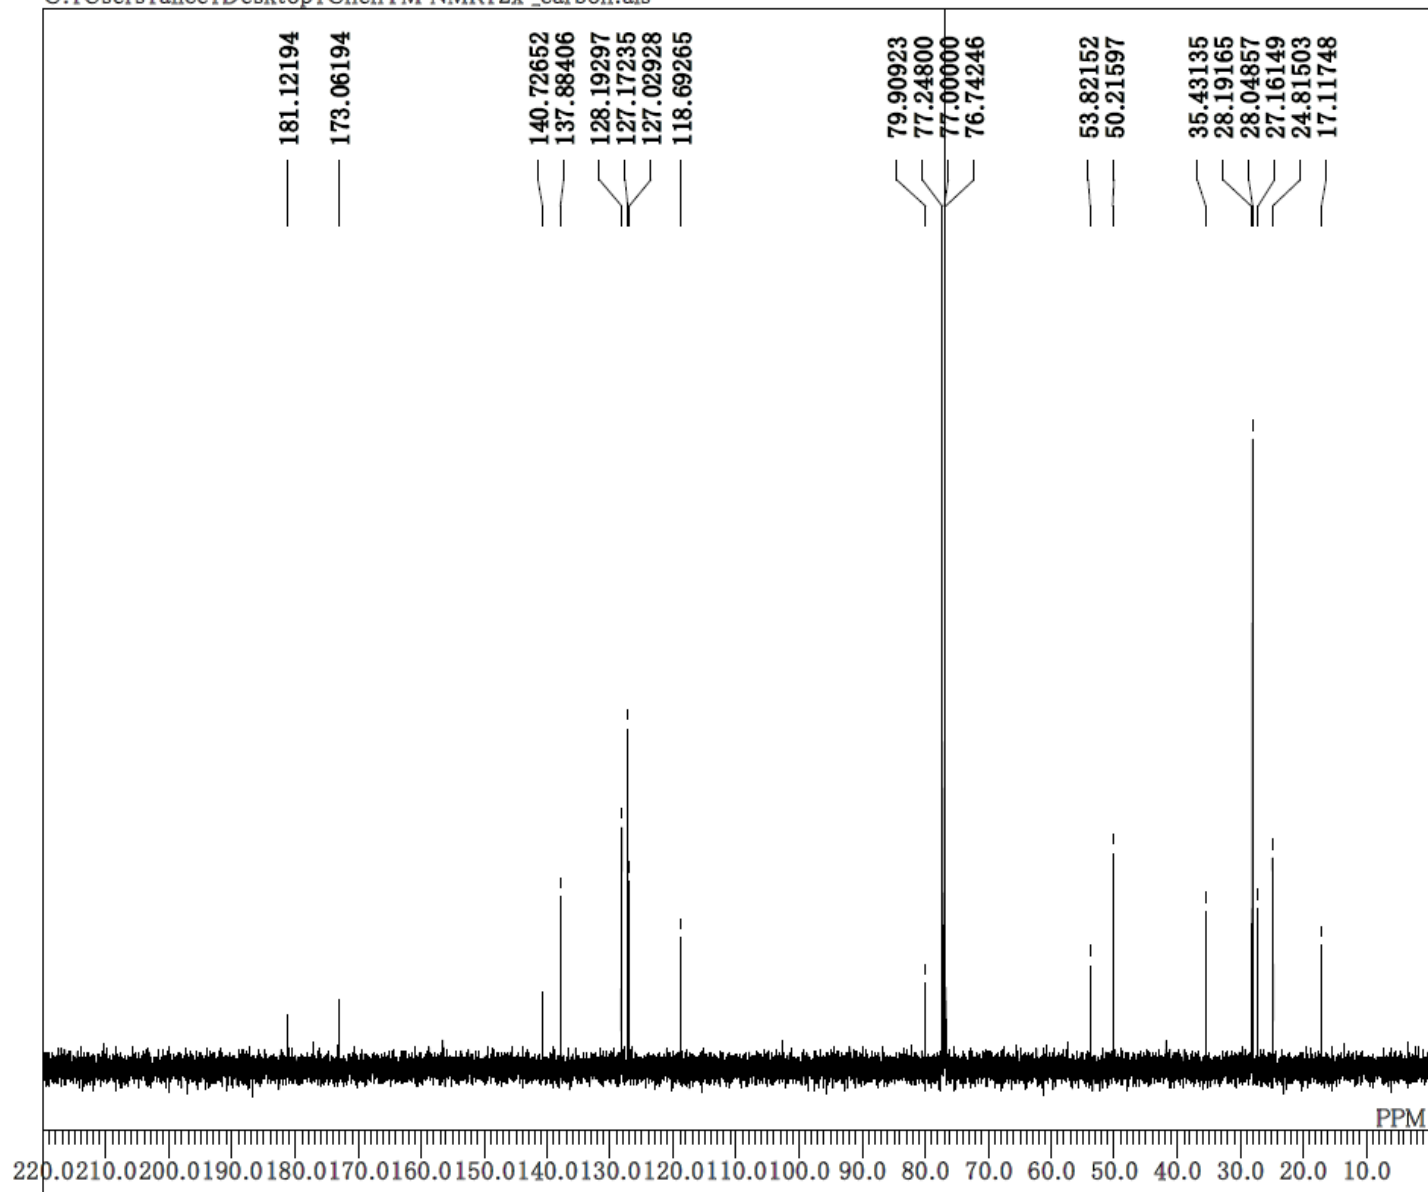

DFILE 2x'\_carbon.als  
COMNT  
DATIM 2019-12-07 11:42:18  
OBNUC 13C  
EXMOD carbon.jpg  
OBFRQ 125.77 MHz  
OBSET 7.87 KHz  
OBFIN 4.21 Hz  
POINT 26214  
FREQU 31446.54 Hz  
SCANS 127  
ACQTM 0.8336 sec  
PD 2.0000 sec  
PW1 3.40 usec  
IRNUC 1H  
CTEMP 21.3 c  
SLVNT CDCL3  
EXREF 77.00 ppm  
BF 0.12 Hz  
RGAIN 60

C:\Users\valice\Desktop\ChenTM NMR\2y\_proton.als

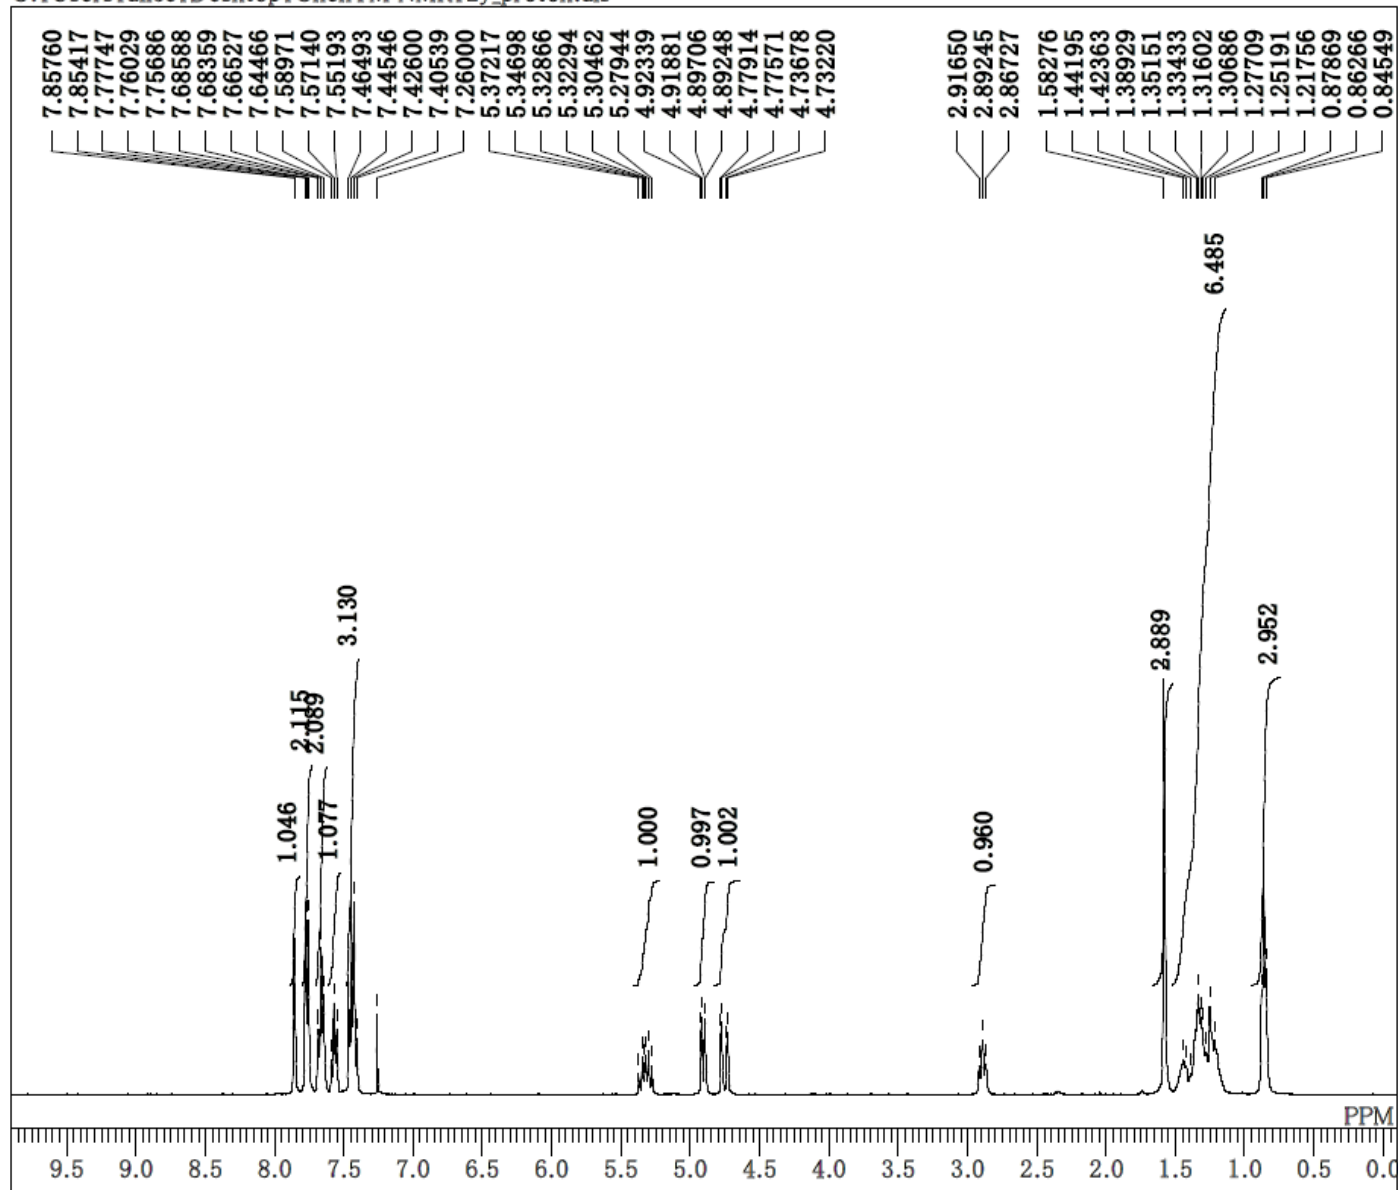

DFILE 2y\_proton.als  
 COMNT  
 DATIM 21-03-2020 15:35:59  
 OBNUC <sup>1</sup>H  
 EXMOD proton.jxp  
 OBFRQ 391.78 MHz  
 OBSET 8.51 KHz  
 OBFIN 3.34 Hz  
 POINT 13107  
 FREQU 5878.90 Hz  
 SCANS 8  
 ACQTM 2.2295 sec  
 PD 6.0000 sec  
 PW1 5.17 usec  
 IRNUC <sup>1</sup>H  
 CTEMP 20.4 c  
 SLVNT CDCL<sub>3</sub>  
 EXREF 7.26 ppm  
 BF 0.12 Hz  
 RGAIN 34

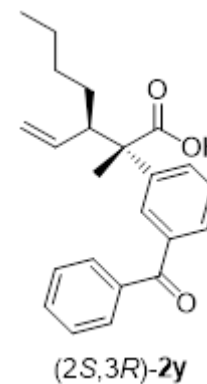

C:\Users\alice\Desktop\ChenTM NMR\2y\_carbon.als

DFILE 2y\_carbon.als  
 COMNT  
 DATIM 21-03-2020 15:38:00  
 OBNUC 13C  
 EXMOD carbon.jpg  
 OBFRQ 98.52 MHz  
 OBSET 4.64 KHz  
 OBFIN 8.74 Hz  
 POINT 26214  
 FREQU 24630.54 Hz  
 SCANS 248  
 ACQTM 1.0643 sec  
 PD 2.0000 sec  
 PW1 3.12 usec  
 IRNUC 1H  
 CTEMP 20.6 c  
 SLVNT CDCL3  
 EXREF 77.00 ppm  
 BF 0.12 Hz  
 RGAIN 60

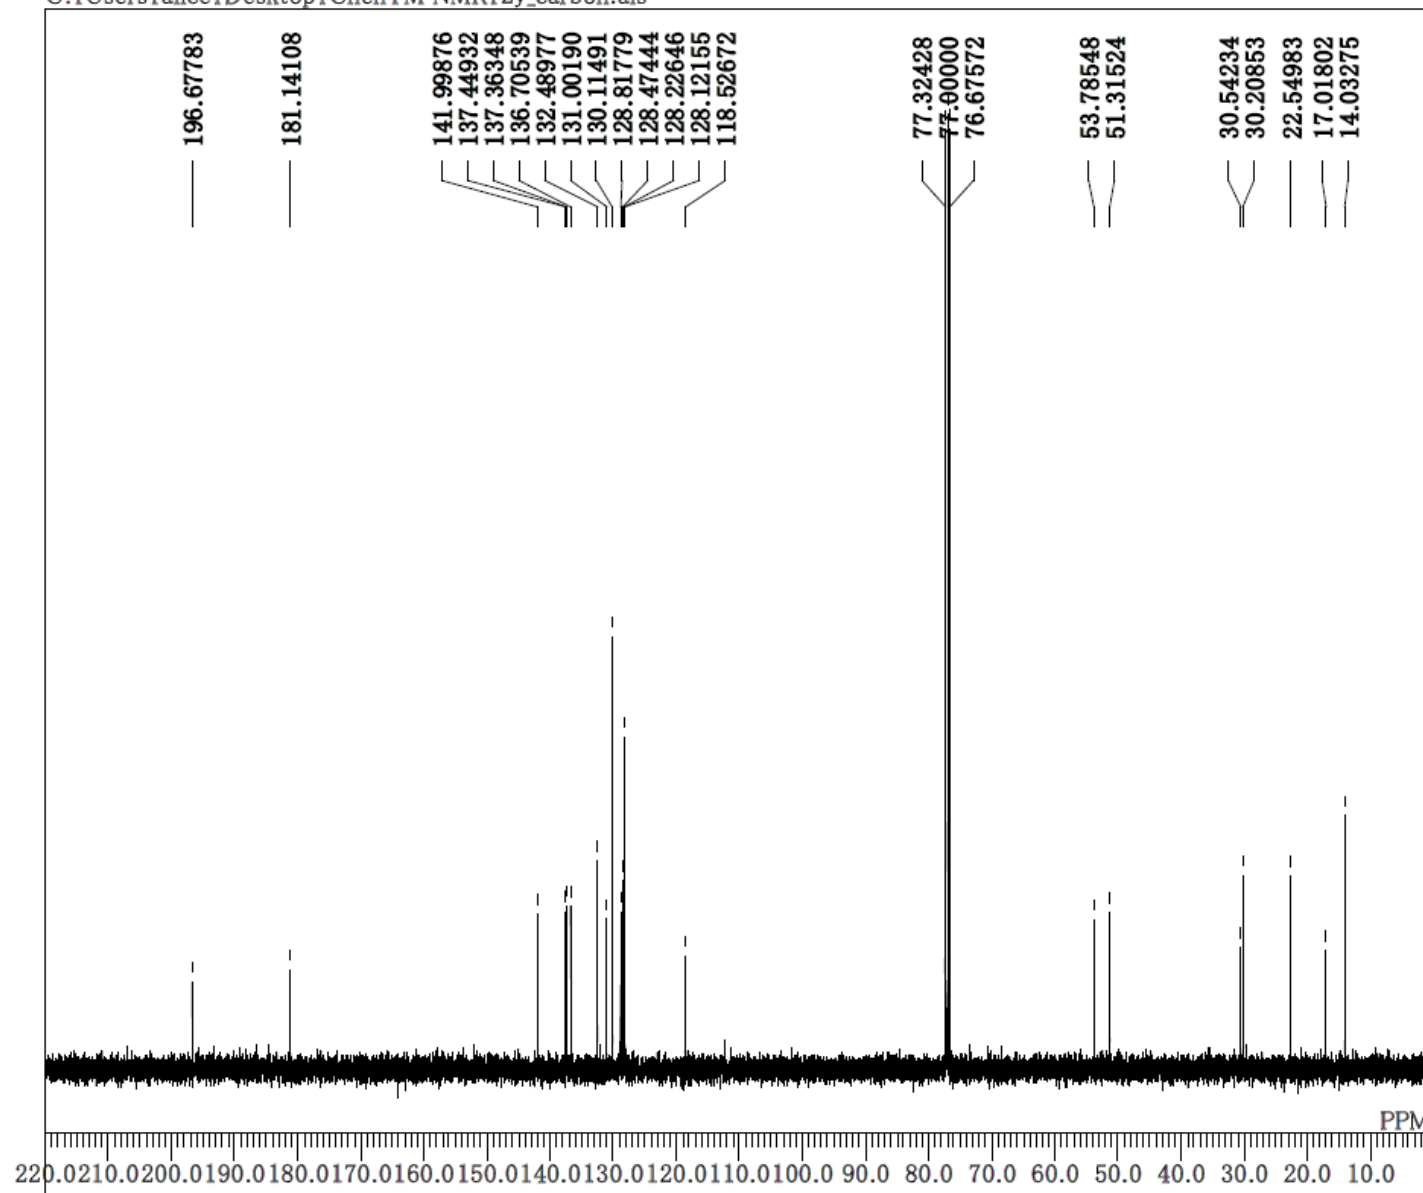



C:\Users\Valice\Desktop\ChenTM NMR\2y'\_proton.als

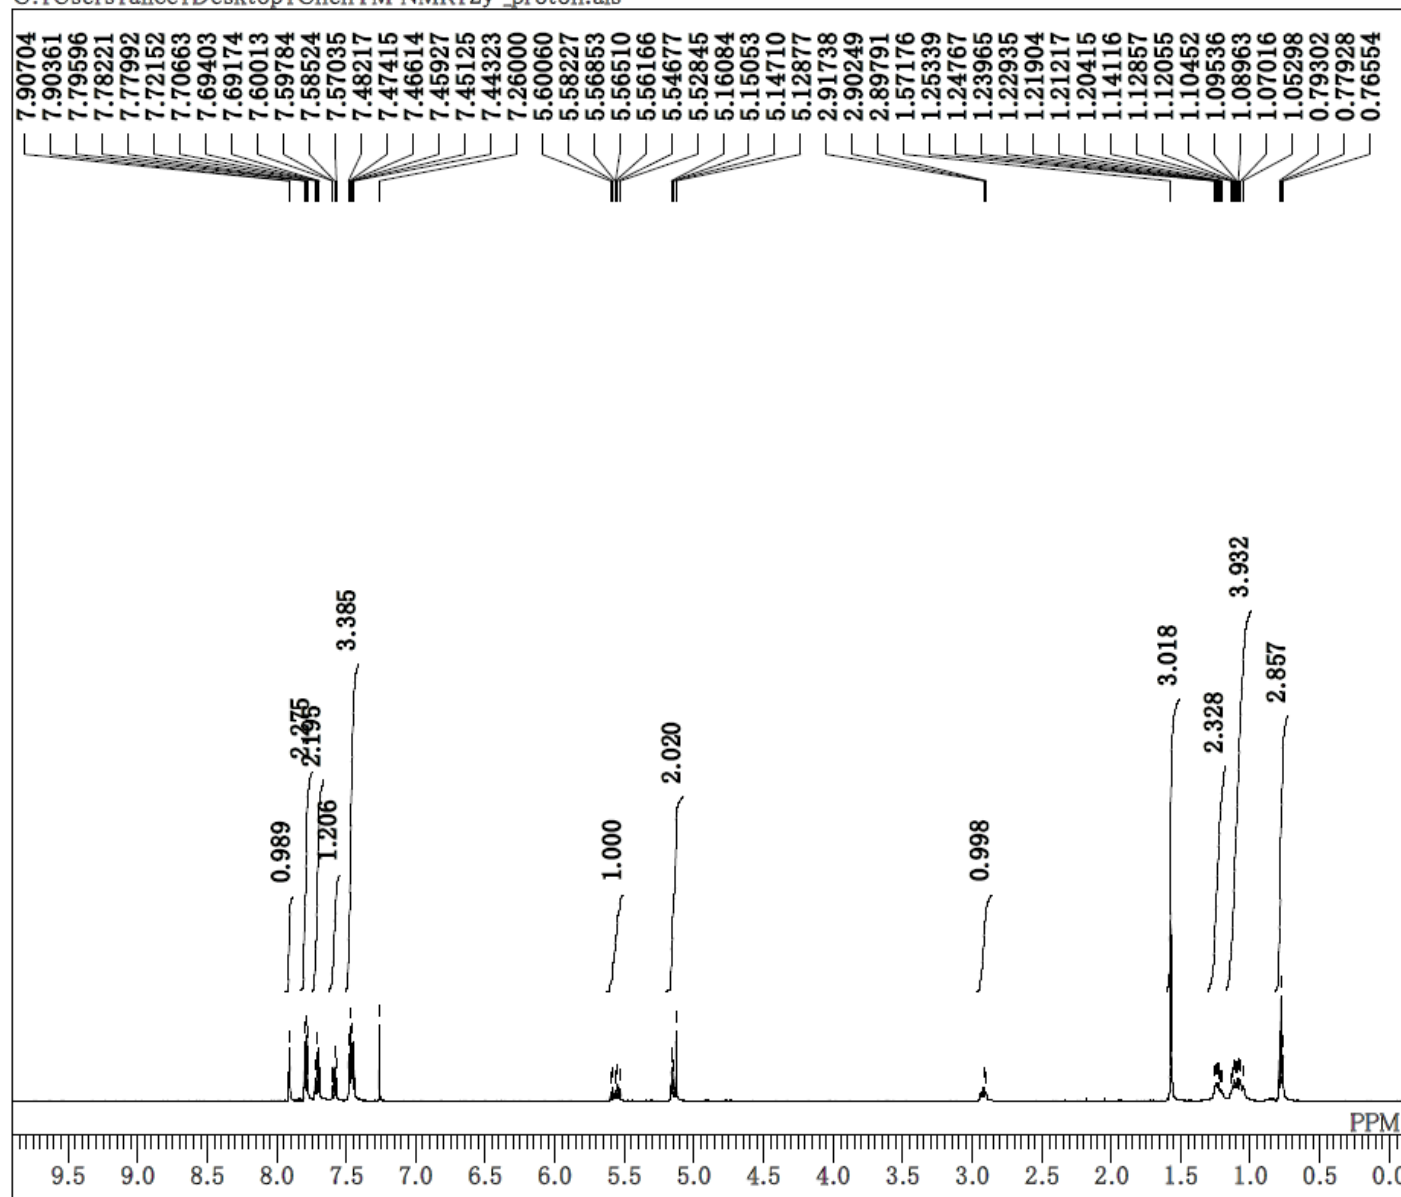

DFILE 2y'\_proton.als  
 COMNT  
 DATIM 2019-11-06 12:10:51  
 OBNUC 1H  
 EXMOD proton.jxp  
 OBFRQ 500.16 MHz  
 OBSET 2.41 KHz  
 OBFIN 6.01 Hz  
 POINT 13107  
 FREQU 7507.51 Hz  
 SCANS 8  
 ACQTM 1.7459 sec  
 PD 6.0000 sec  
 PW1 5.55 usec  
 IRNUC 1H  
 CTEMP 21.8 c  
 SLVNT CDCL3  
 EXREF 7.26 ppm  
 BF 0.10 Hz  
 RGAIN 42

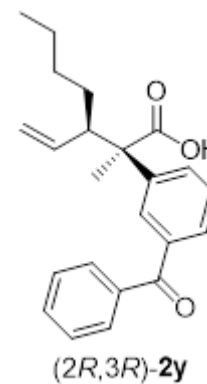

C:\Users\alice\Desktop\ChenTM NMR\2y'\_carbon.als

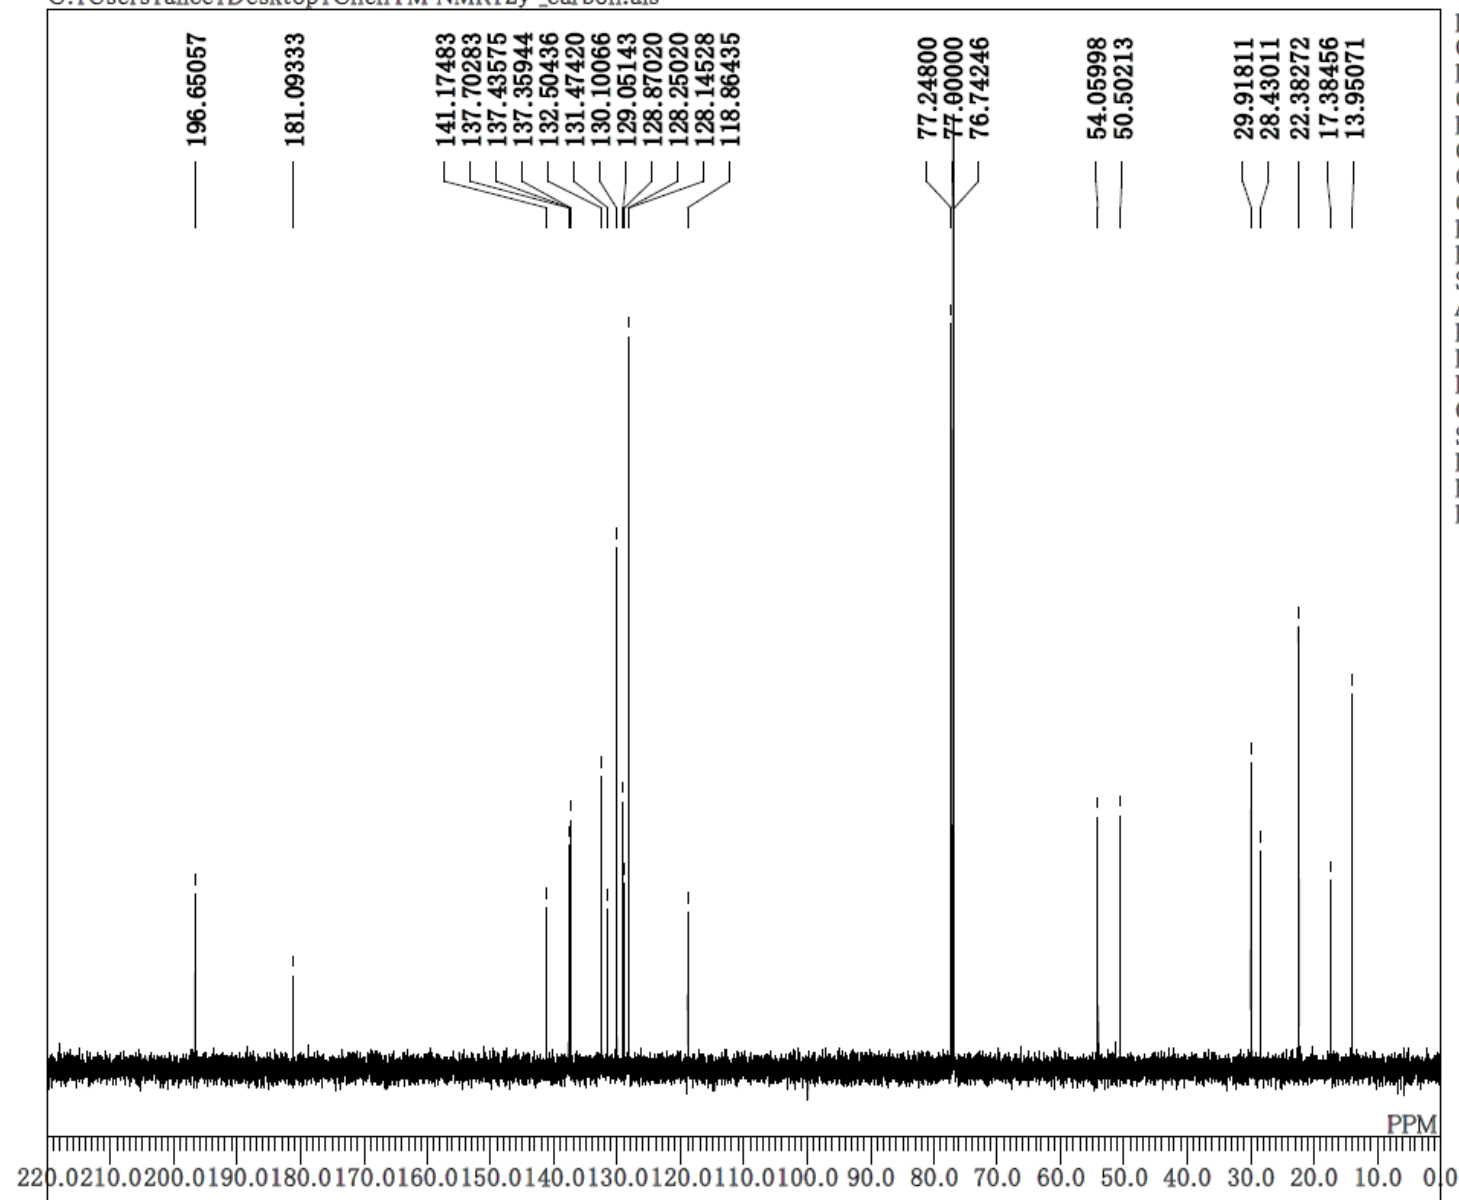

DFILE 2y'\_carbon.als  
 COMNT  
 DATIM 2019-11-06 12:45:44  
 OBNUC 13C  
 EXMOD carbon.jxp  
 OBFRQ 125.77 MHz  
 OBSET 7.87 KHz  
 OBFIN 4.21 Hz  
 POINT 26214  
 FREQU 31446.54 Hz  
 SCANS 101  
 ACQTM 0.8336 sec  
 PD 2.0000 sec  
 PW1 3.40 usec  
 IRNUC 1H  
 CTEMP 22.1 c  
 SLVNT CDCL3  
 EXREF 77.00 ppm  
 BF 0.10 Hz  
 RGAIN 60

C:\Users\alice\Desktop\Gousei\Chen\Chen\_SM2\2aa\_proton.als

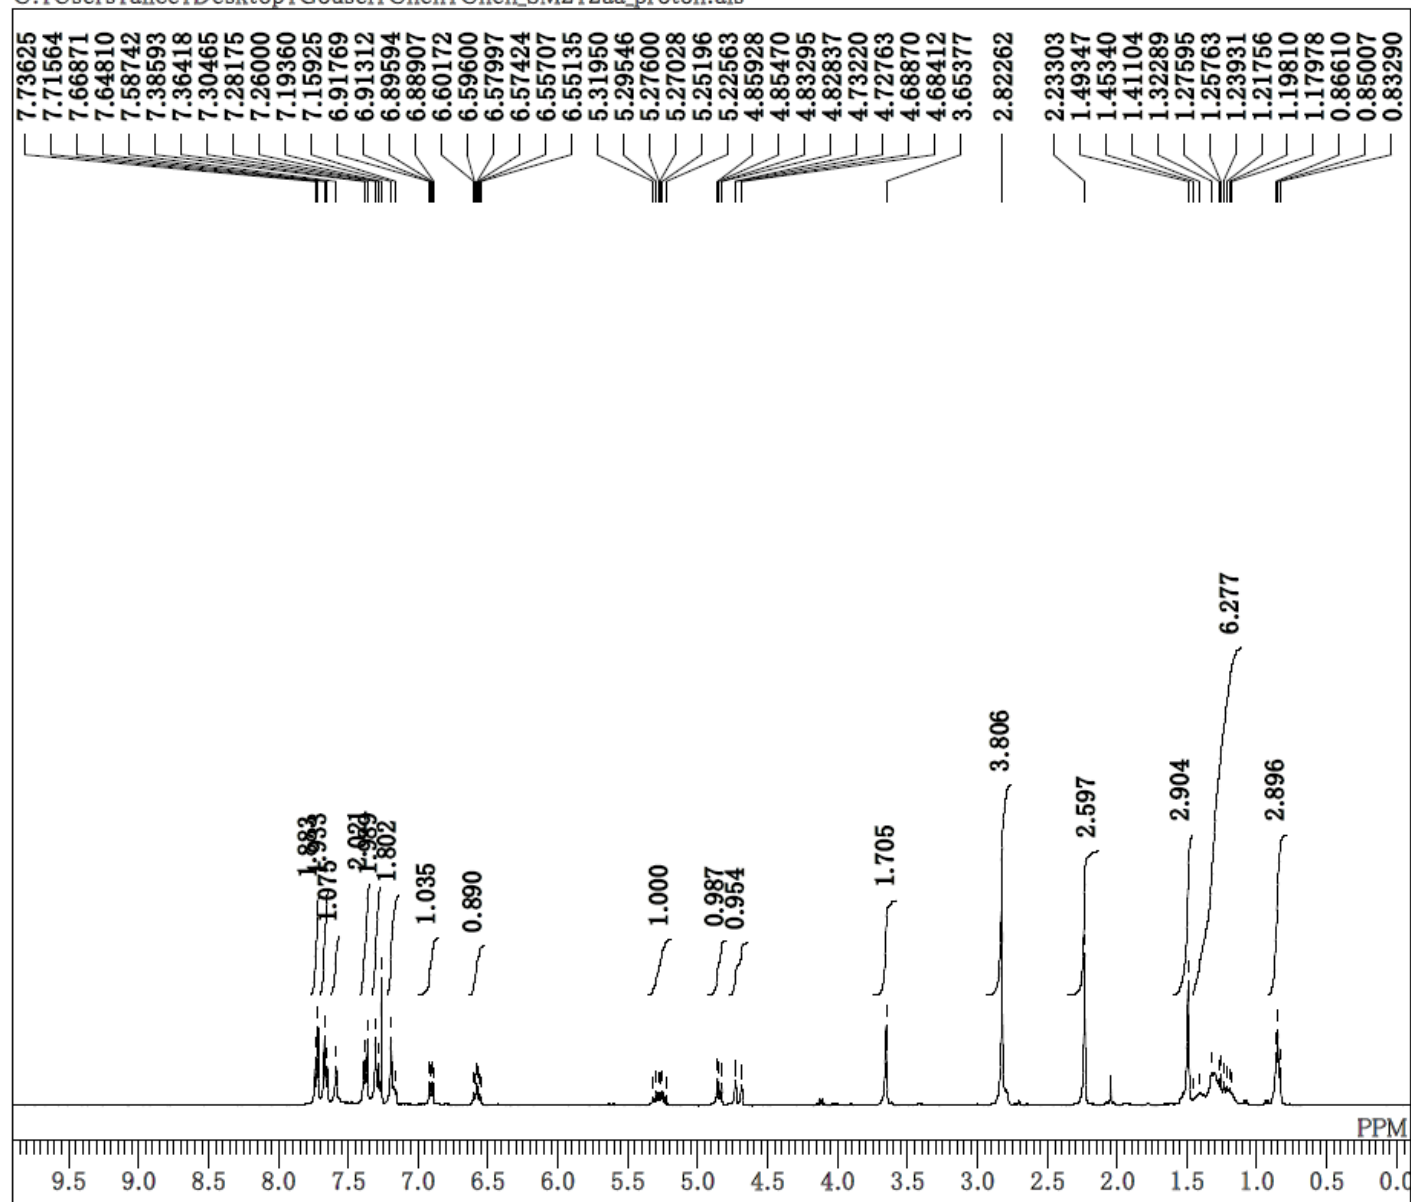

2aa\_proton.als  
 30-10-2020 20:49:15  
 1H  
 proton.jxp  
 391.78 MHz  
 8.51 KHz  
 3.34 Hz  
 13107  
 5878.90 Hz  
 8  
 2.2295 sec  
 6.0000 sec  
 5.17 usec  
 1H  
 21.1 c  
 CDCL3  
 7.26 ppm  
 0.12 Hz  
 42

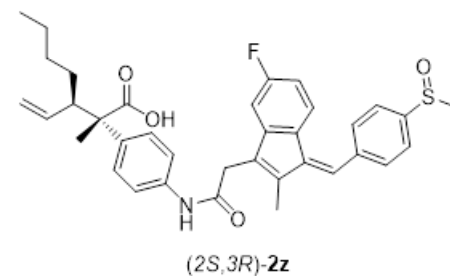

C:\Users\alice\Desktop\Gousei\Chen\Chen\_SM2\2z\_carbon-1-1.als

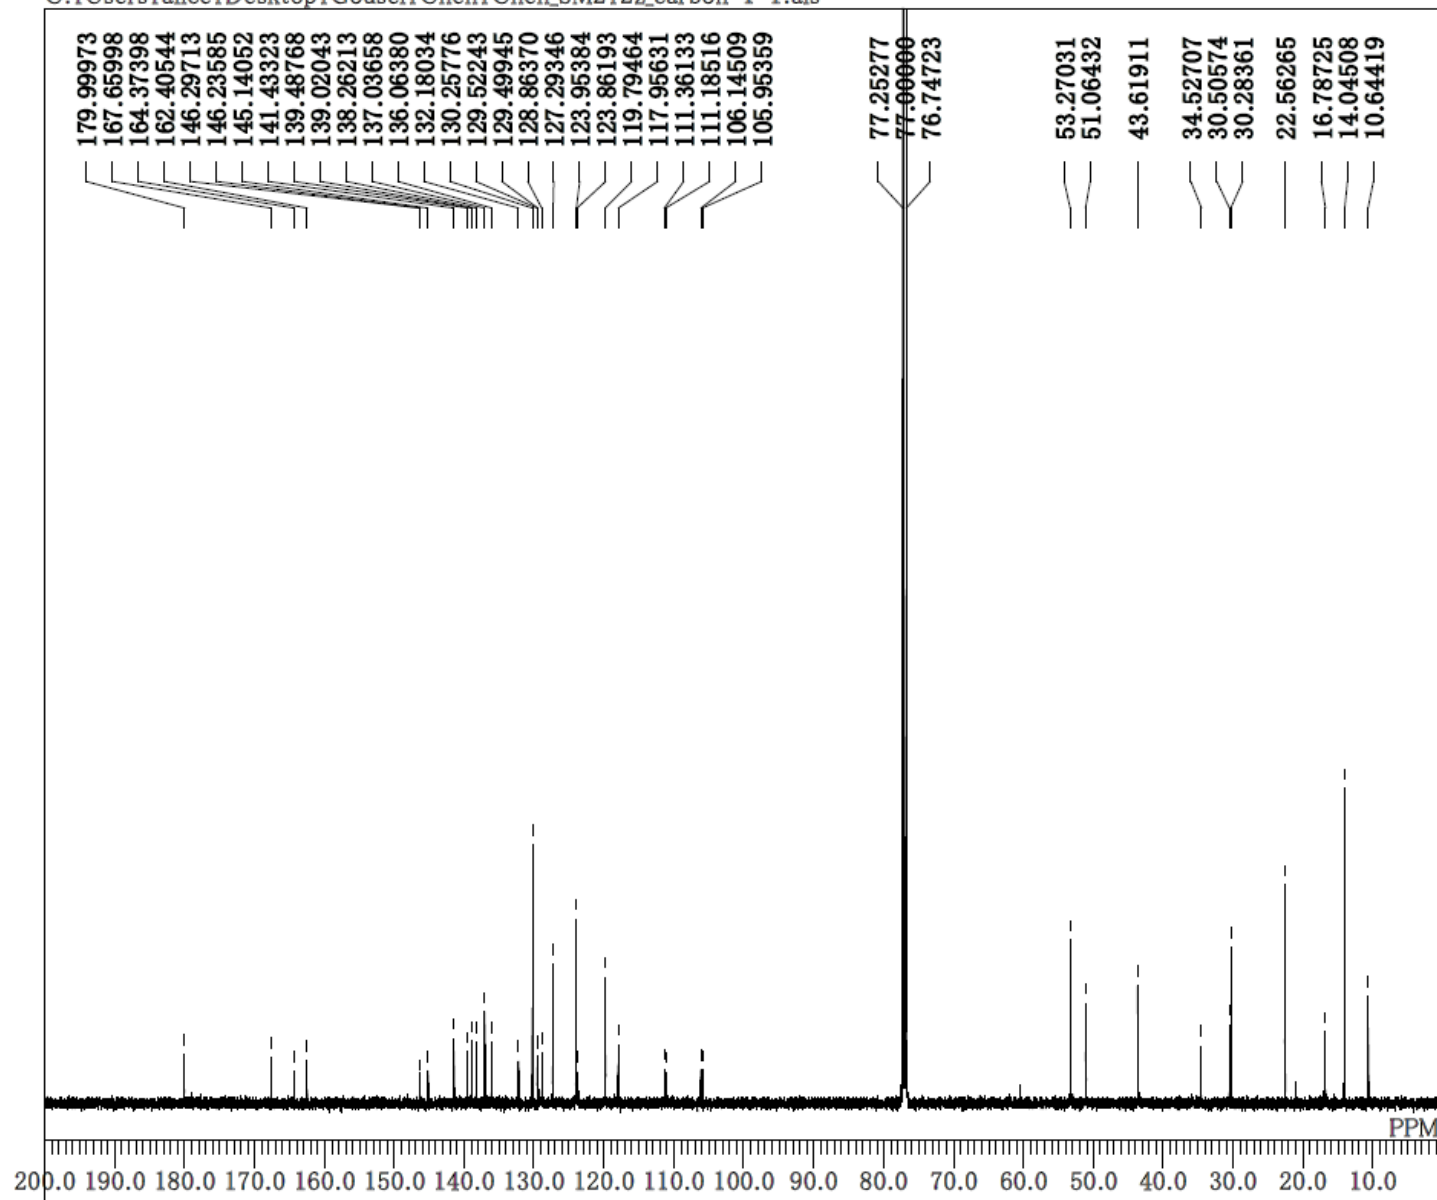

|       |                     |
|-------|---------------------|
| DFILE | 2z_carbon-1-1.als   |
| COMNT |                     |
| DATIM | 2020-10-30 23:49:17 |
| OBNUC | <sup>13</sup> C     |
| EXMOD | carbon.jxp          |
| OBFRQ | 125.77 MHz          |
| OBSET | 7.87 KHz            |
| OBFIN | 4.21 Hz             |
| POINT | 26214               |
| FREQU | 25252.53 Hz         |
| SCANS | 8180                |
| ACQTM | 1.0381 sec          |
| PD    | 2.0000 sec          |
| PW1   | 3.40 usec           |
| IRNUC | <sup>1</sup> H      |
| CTEMP | 22.5 c              |
| SLVNT | CDCL <sub>3</sub>   |
| EXREF | 77.00 ppm           |
| BF    | 0.12 Hz             |
| RGAIN | 60                  |

I:\sulundac F\ sulindac\_2z\_F-1-1.als

-112.00521

|       |                       |
|-------|-----------------------|
| DFILE | sulindac_2z_F-1-1.als |
| COMNT |                       |
| DATIM | 14-11-2020 09:26:41   |
| OBNUC | 19F                   |
| EXMOD | proton.jxp            |
| OBFRQ | 368.64 MHz            |
| OBSET | 7.63 KHz              |
| OBFIN | 2.85 Hz               |
| POINT | 13107                 |
| FREQU | 149253.73 Hz          |
| SCANS | 8                     |
| ACQTM | 0.0000 sec            |
| PD    | 6.0000 sec            |
| PW1   | 4.10 usec             |
| IRNUC | 19F                   |
| CTEMP | 20.5 c                |
| SLVNT | CDCL3                 |
| EXREF | 0.00 ppm              |
| BF    | 1.00 Hz               |
| RGAIN | 50                    |

PPM

200190180170160150140130120110100.90.80.70.60.50.40.30.20.10.00.0-10-20-30-40-50-60-70-80-90.00010120130140.0

C:\Users\alice\Desktop\Gousei\Chen\Chen\_SM2\2z'\_proton-1-1.als

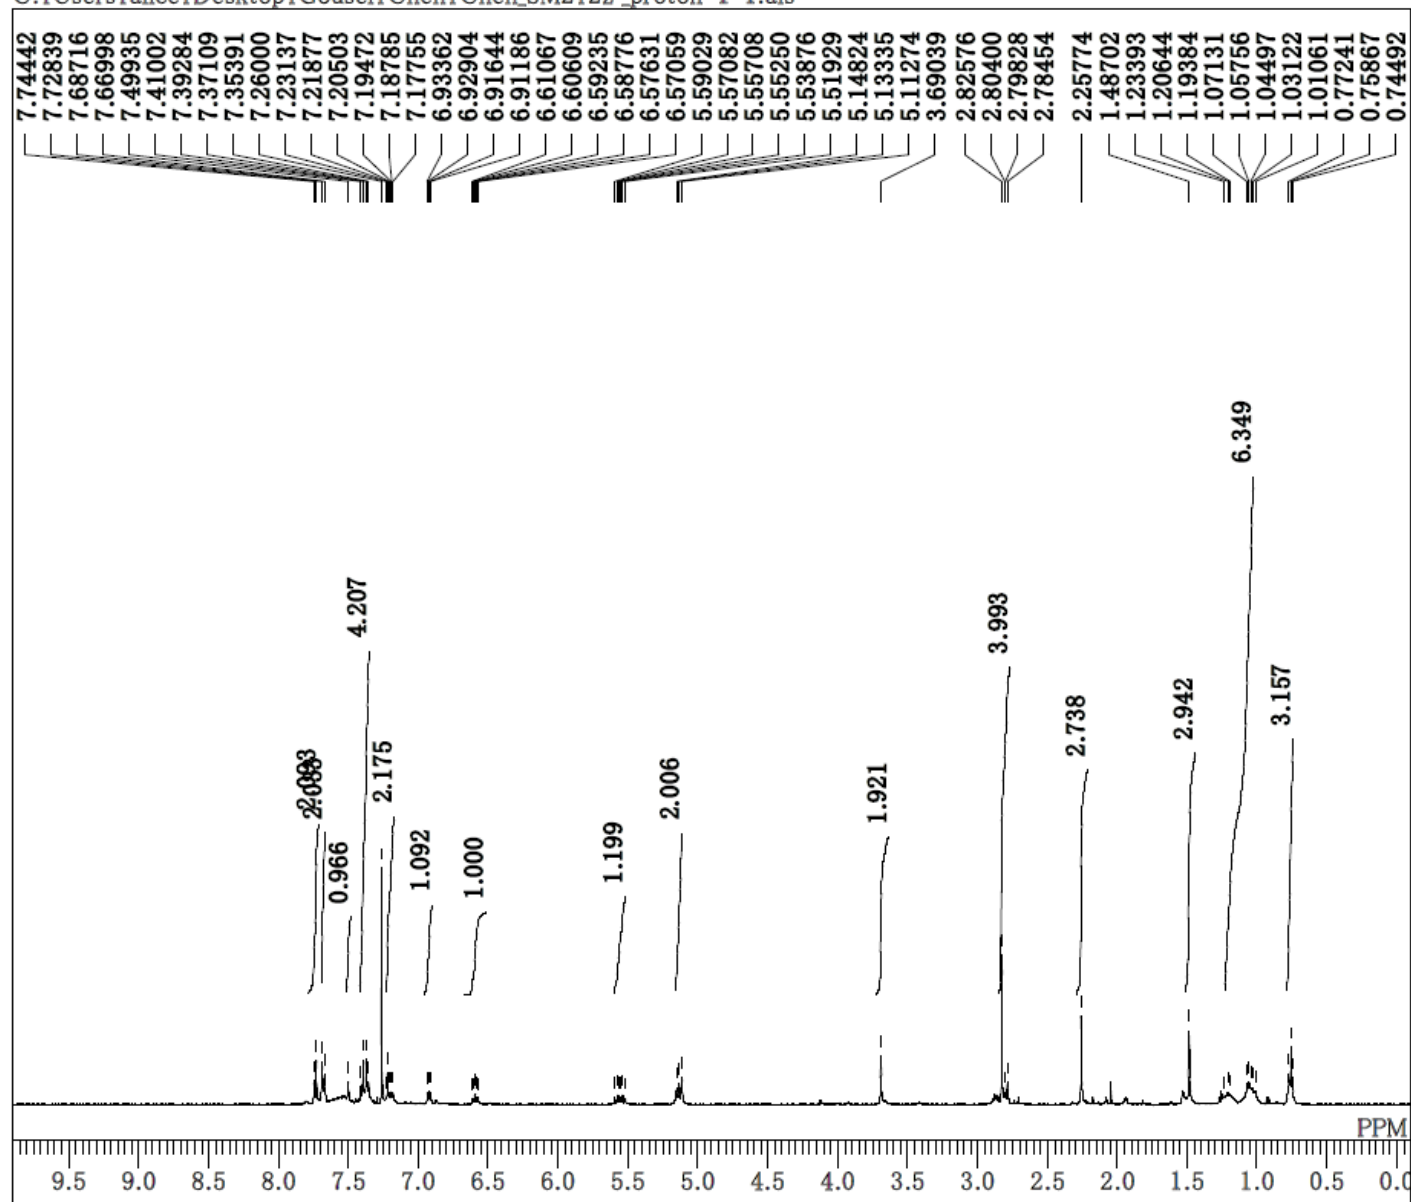

DFILE 2z'\_proton-1-1.als  
 COMNT  
 DATIM 2020-10-31 14:51:44  
 OBNUC 1H  
 EXMOD proton.jxp  
 OBFRQ 500.16 MHz  
 OBSET 2.41 KHz  
 OBFIN 6.01 Hz  
 POINT 13107  
 FREQU 7507.51 Hz  
 SCANS 8  
 ACQTM 1.7459 sec  
 PD 6.0000 sec  
 PW1 5.55 usec  
 IRNUC 1H  
 CTEMP 21.9 c  
 SLVNT CDCL3  
 EXREF 7.26 ppm  
 BF 0.12 Hz  
 RGAIN 42

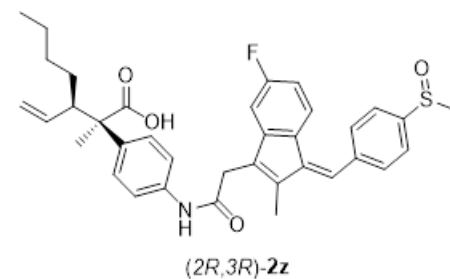

C:\Users\alice\Desktop\Gousei\Chen\Chen\_SM2\2z'\_carbon-1-1.als

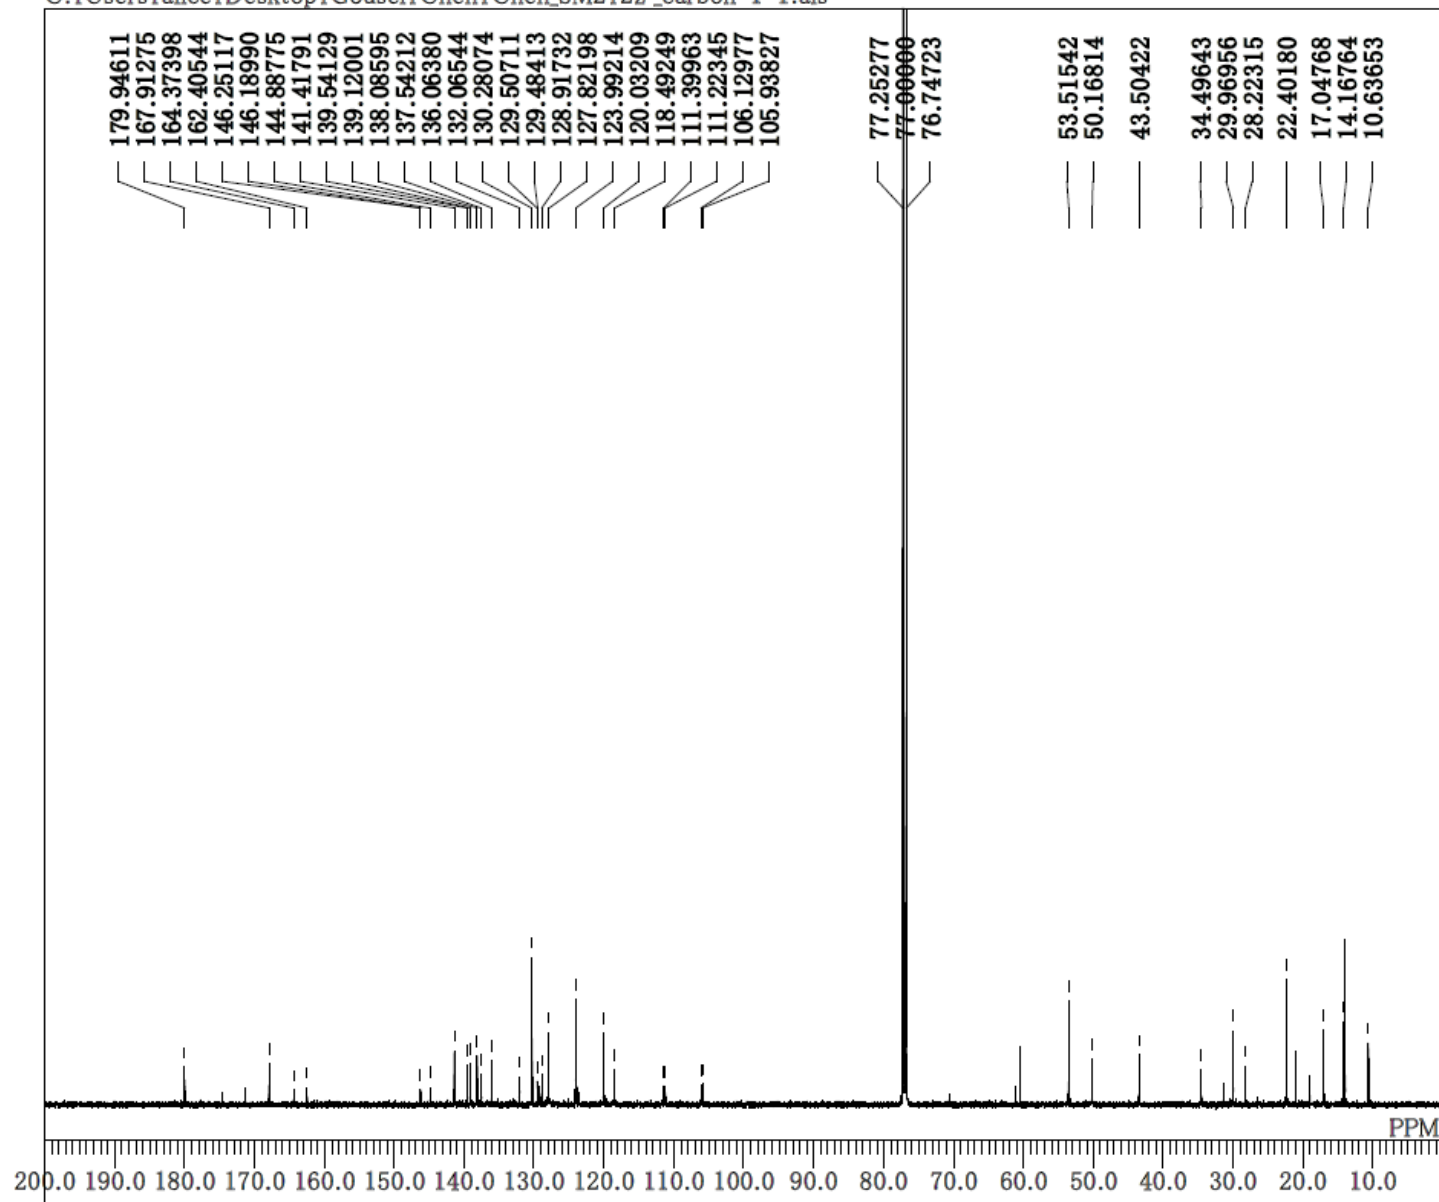

DFILE 2z'\_carbon-1-1.als  
 COMNT  
 DATIM 2020-10-31 21:09:03  
 OBNUC 13C  
 EXMOD carbon.jxp  
 OBFRQ 125.77 MHz  
 OBSET 7.87 KHz  
 OBFIN 4.21 Hz  
 POINT 26214  
 FREQU 25252.53 Hz  
 SCANS 20000  
 ACQTM 1.0381 sec  
 PD 2.0000 sec  
 PW1 3.40 usec  
 IRNUC 1H  
 CTEMP 22.4 c  
 SLVNT CDCL3  
 EXREF 77.00 ppm  
 BF 0.12 Hz  
 RGAIN 60

I:\sulundac F\ sulindac\_2z'\_F-1-1.als

-111.88166

DFILE sulindac\_2z'\_F-1-1.als  
COMNT  
DATIM 14-11-2020 09:37:40  
OBNUC 19F  
EXMOD proton.jxp  
OBFRQ 368.64 MHz  
OBSET 7.63 KHz  
OBFIN 2.85 Hz  
POINT 13107  
FREQU 149253.73 Hz  
SCANS 20  
ACQTM 0.0000 sec  
PD 6.0000 sec  
PW1 4.10 usec  
IRNUC 19F  
CTEMP 20.2 c  
SLVNT CDCL3  
EXREF 0.00 ppm  
BF 1.00 Hz  
RGAIN 50

PPM

200190180170160150140130120110100.90.80.70.60.50.40.30.20.10.00.0-10-20-30-40-50-60-70-80-90-10010120130140.0



C:\Users\valice\Desktop\Gousei\Chen\Chen\_SM2\2aa\_proton.als

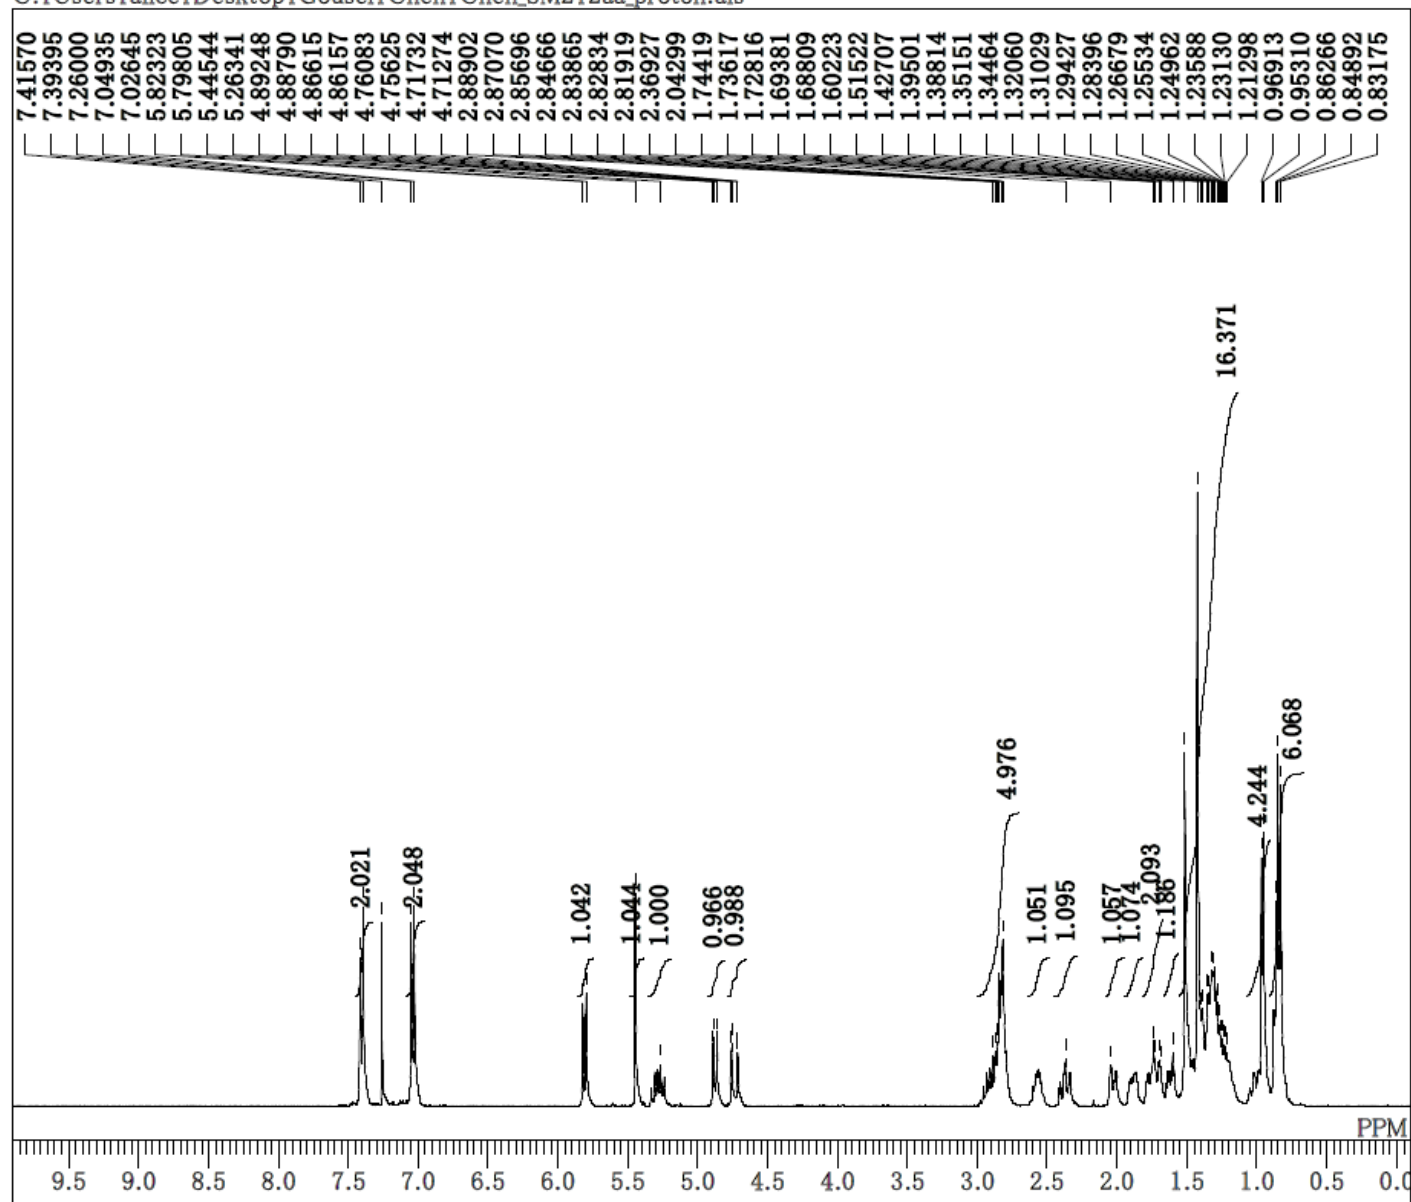

DFILE  
COMNT  
DATIM  
OBNUC  
EXMOD  
OBFRQ  
OBSET  
OBFIN  
POINT  
FREQU  
SCANS  
ACQTM  
PD  
PW1  
IRNUC  
CTEMP  
SLVNT  
EXREF  
BF  
RGAIN

2aa\_proton.als  
22-10-2020 19:52:10  
1H  
proton.jxp  
391.78 MHz  
8.51 KHz  
3.34 Hz  
13107  
5878.90 Hz  
8  
2.2295 sec  
6.0000 sec  
5.17 usec  
1H  
21.1 c  
CDCL3  
7.26 ppm  
0.12 Hz  
34

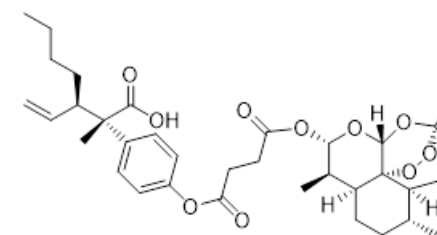

(2S,3R)-2aa

C:\Users\Valice\Desktop\Gousei\Chen\Chen\_SM2\F2aa\_carbon.als

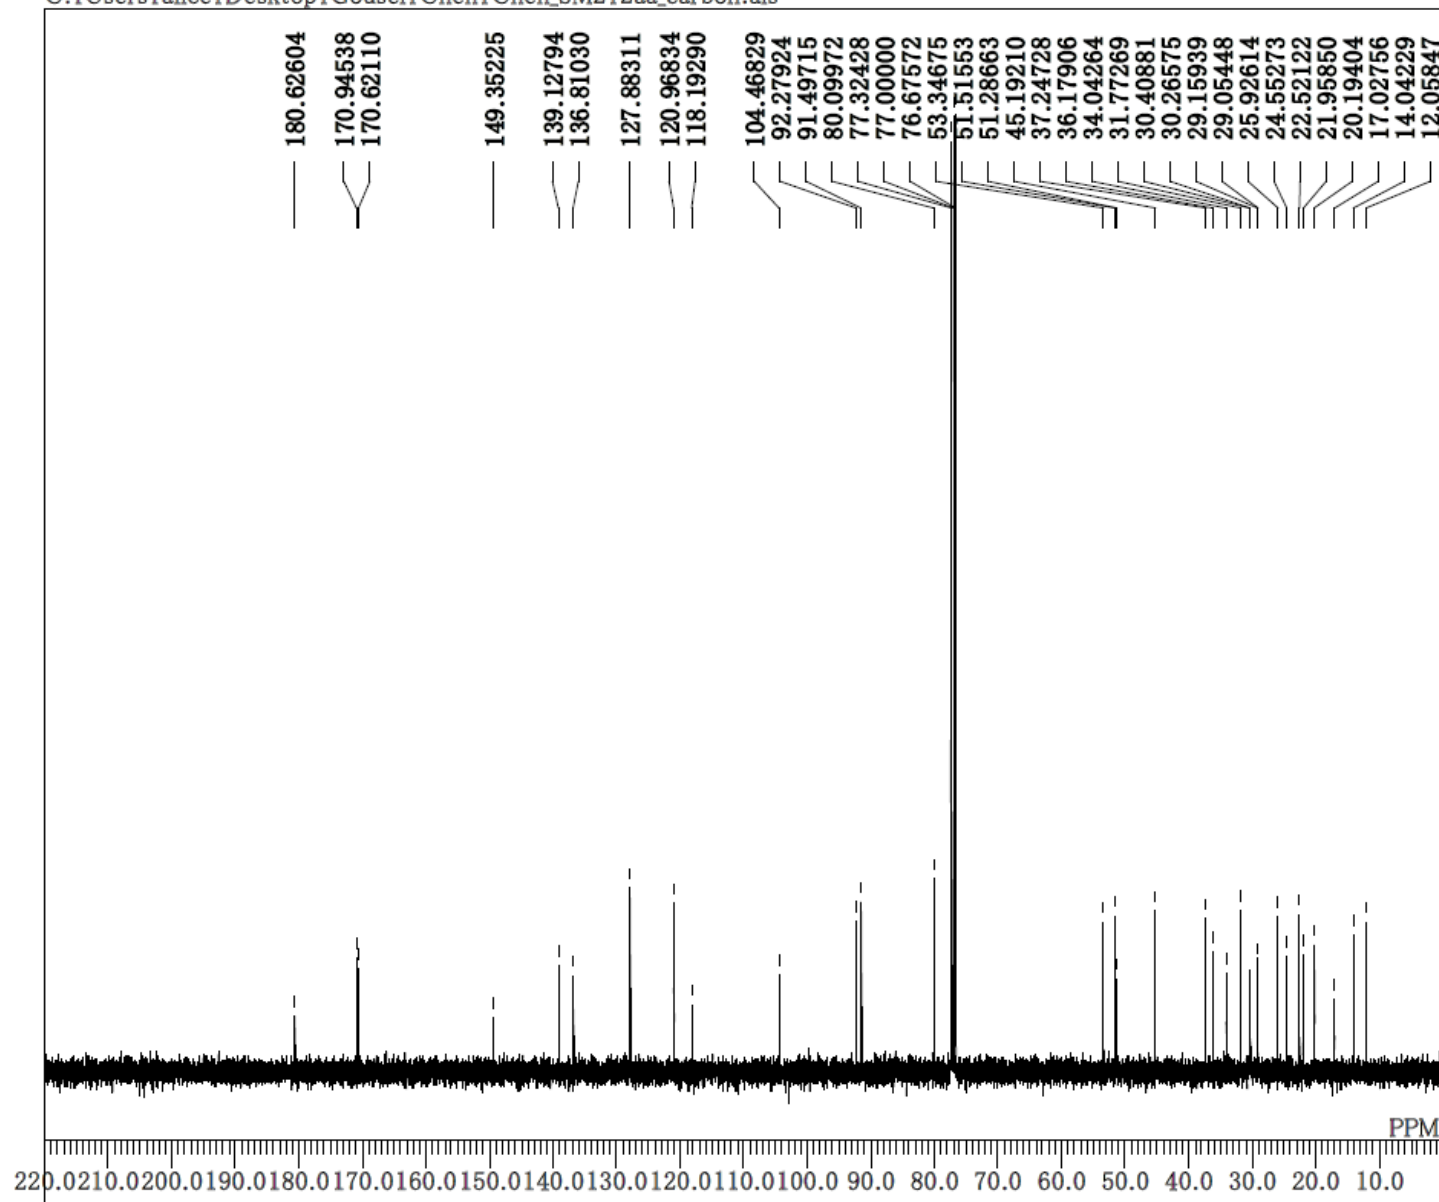

|       |                     |
|-------|---------------------|
| DFILE | 2aa_carbon.als      |
| COMNT |                     |
| DATIM | 22-10-2020 19:54:15 |
| OBNUC | <sup>13</sup> C     |
| EXMOD | carbon.jxp          |
| OBFRQ | 98.52 MHz           |
| OBSET | 4.64 KHz            |
| OBFIN | 8.74 Hz             |
| POINT | 26214               |
| FREQU | 24630.54 Hz         |
| SCANS | 464                 |
| ACQTM | 1.0643 sec          |
| PD    | 2.0000 sec          |
| PW1   | 3.12 usec           |
| IRNUC | <sup>1</sup> H      |
| CTEMP | 21.1 c              |
| SLVNT | CDCL <sub>3</sub>   |
| EXREF | 77.00 ppm           |
| BF    | 0.12 Hz             |
| RGAIN | 60                  |

C:\Users\alice\Desktop\Gousei\Chen\Chen\_SM2\2aa'\_proton-1-1.als

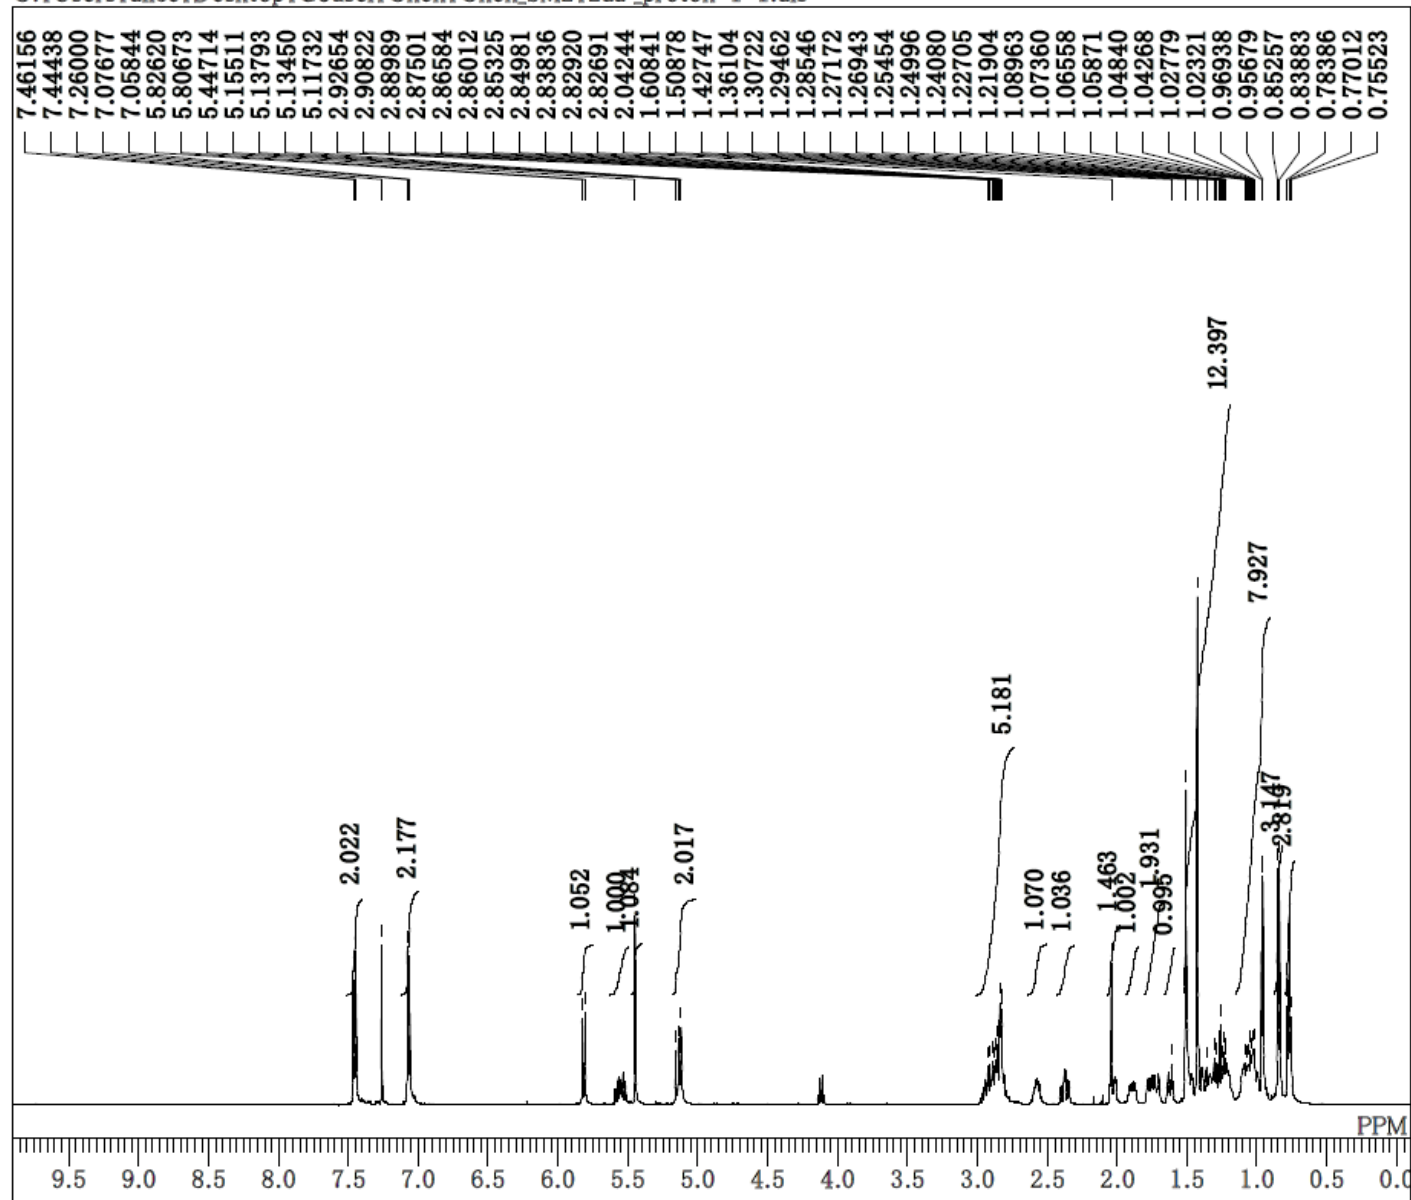

2aa'\_proton-1-1.als  
 2020-10-20 20:59:03  
 1H  
 proton.jxp  
 500.16 MHz  
 2.41 KHz  
 6.01 Hz  
 13107  
 7507.51 Hz  
 8  
 1.7459 sec  
 6.0000 sec  
 5.55 usec  
 1H  
 21.7 c  
 CDCL3  
 7.26 ppm  
 0.32 Hz  
 38

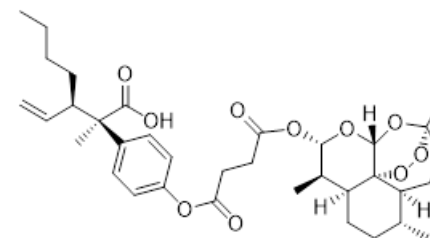

(2R,3R)-2aa

C:\Users\Valice\Desktop\Gousei\Chen\Chen\_SM2\2aa'\_carbon-1-1.als

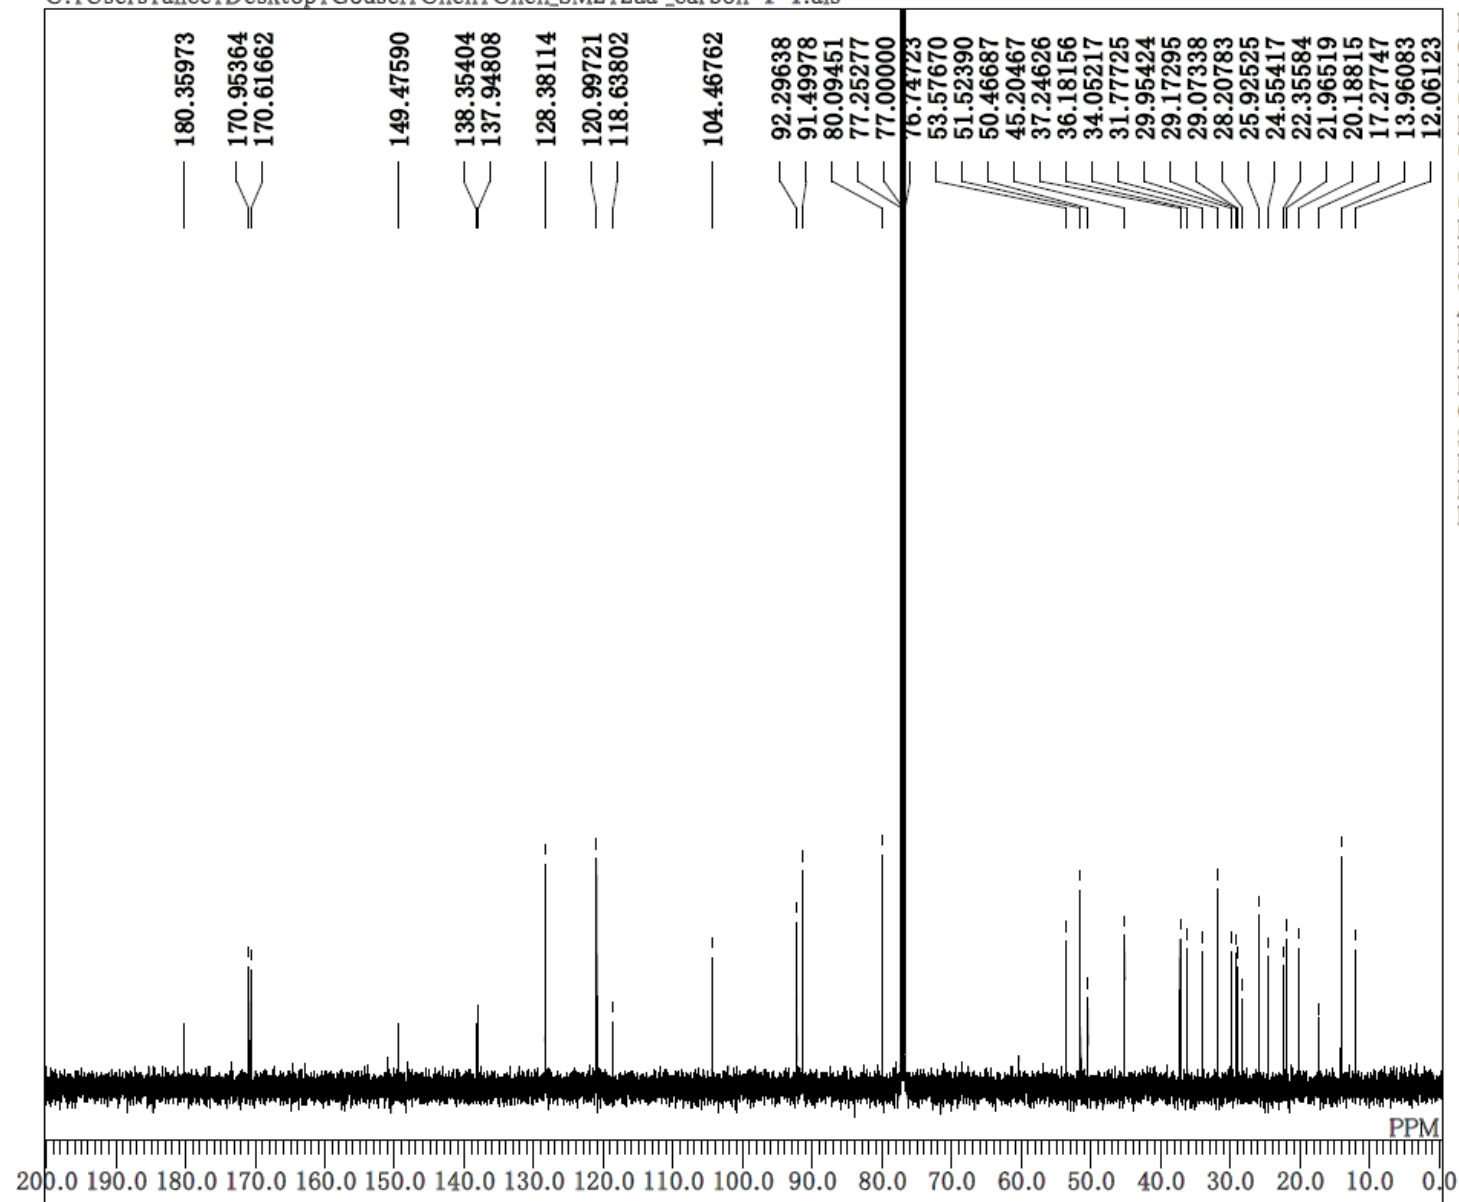

DFILE 2aa'\_carbon-1-1.als  
 COMNT  
 DATIM 2020-10-20 21:01:27  
 OBNUC 13C  
 EXMOD carbon.jxp  
 OBFRQ 125.77 MHz  
 OBSET 7.87 KHz  
 OBFIN 4.21 Hz  
 POINT 26214  
 FREQU 25252.53 Hz  
 SCANS 300  
 ACQTM 1.0381 sec  
 PD 2.0000 sec  
 PW1 3.40 usec  
 IRNUC 1H  
 CTEMP 22.3 c  
 SLVNT CDCL3  
 EXREF 77.00 ppm  
 BF 0.32 Hz  
 RGAIN 60

C:\Users\valice\Desktop\ChenTM NMR\2z\_proton.als

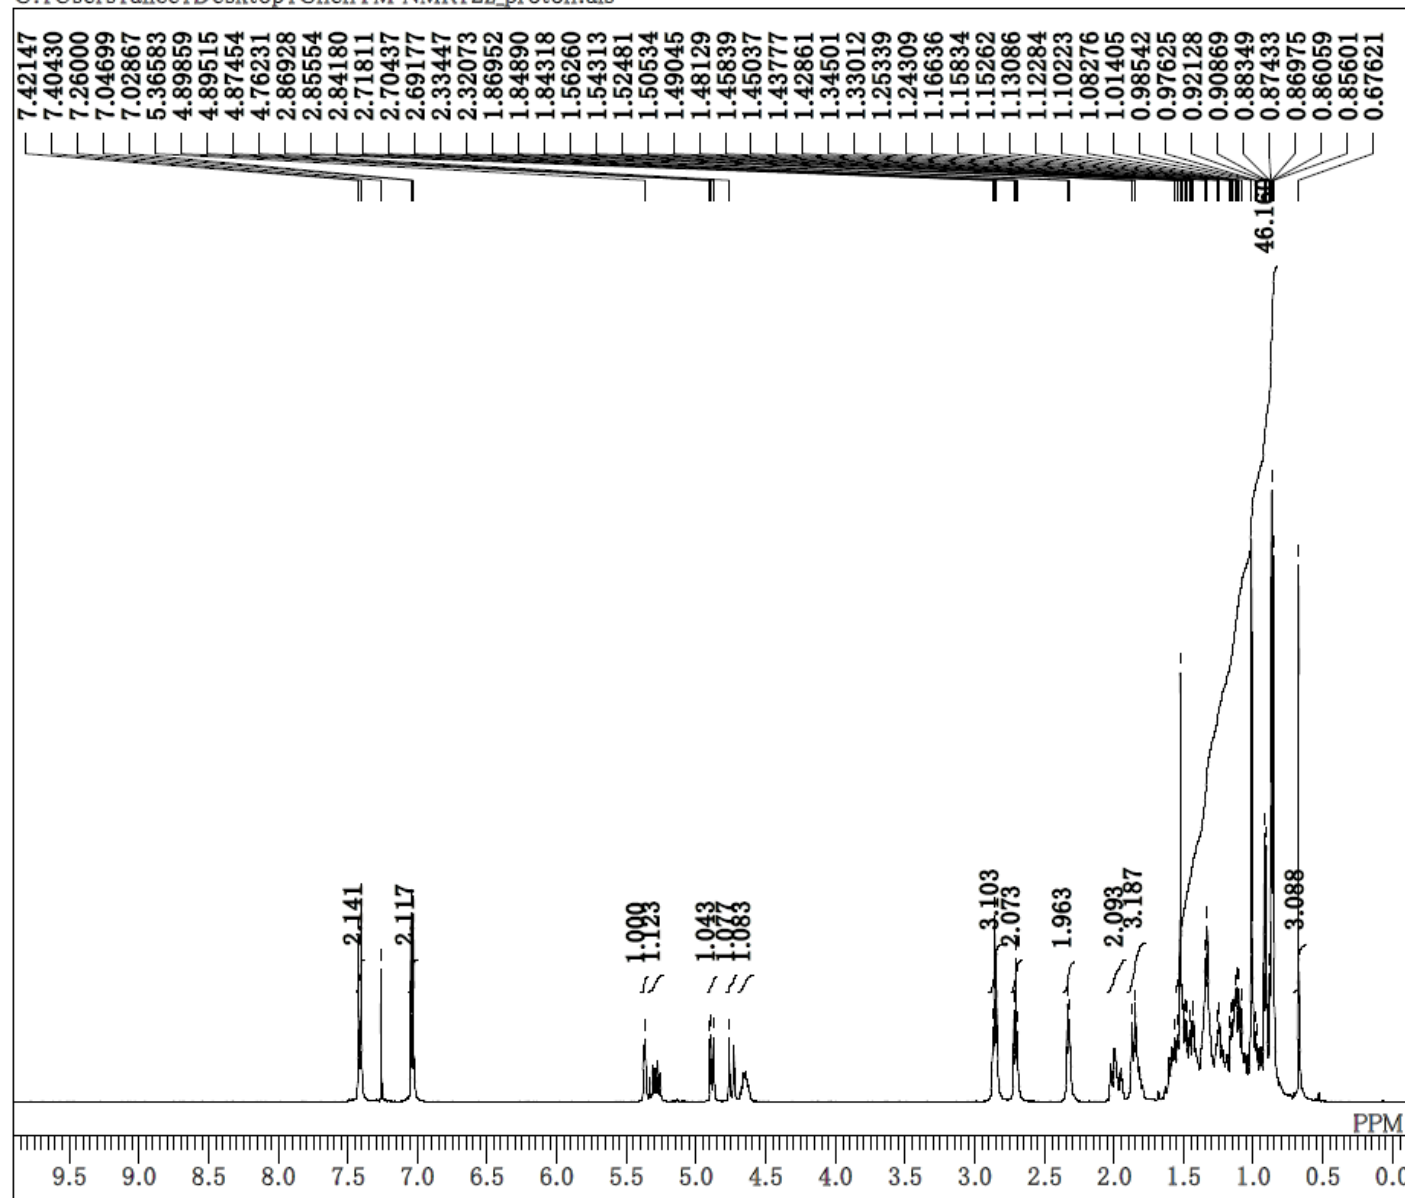

DFILE  
COMNT  
DATIM  
OBNUC  
EXMOD  
OBFRQ  
OBSET  
OBFIN  
POINT  
FREQU  
SCANS  
ACQTM  
PD  
PW1  
IRNUC  
CTEMP  
SLVNT  
EXREF  
BF  
RGAIN

2z\_proton.als  
2019-12-13 12:36:16  
1H  
proton.jxp  
500.16 MHz  
2.41 KHz  
6.01 Hz  
13107  
7507.51 Hz  
8  
1.7459 sec  
6.0000 sec  
5.55 usec  
1H  
21.2 c  
CDCL3  
7.26 ppm  
0.12 Hz  
38

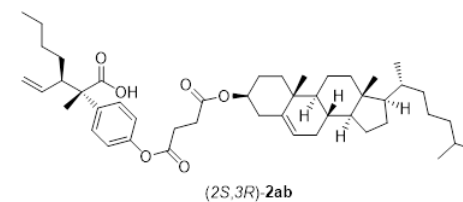

C:\Users\alice\Desktop\ChenTM NMR\2z\_carbon.als

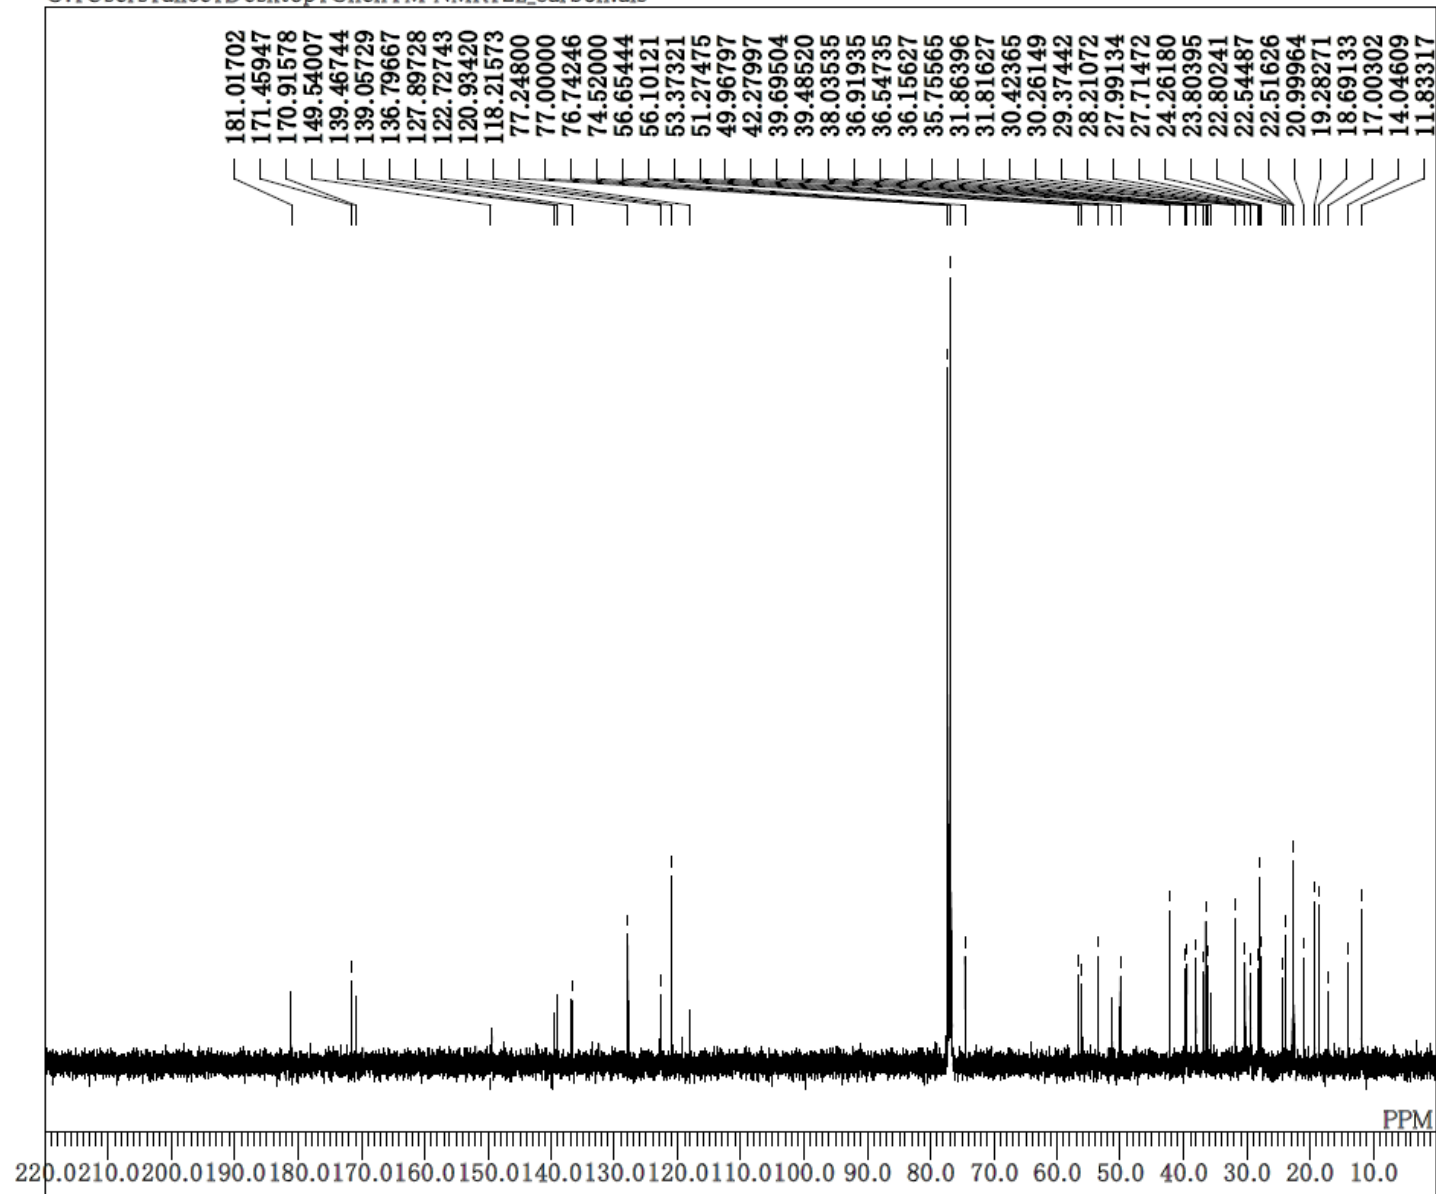

|       |                     |
|-------|---------------------|
| DFILE | 2z_carbon.als       |
| COMNT |                     |
| DATIM | 2019-12-13 12:41:56 |
| OBNUC | <sup>13</sup> C     |
| EXMOD | carbon.jpg          |
| OBFRQ | 125.77 MHz          |
| OBSET | 7.87 KHz            |
| OBFIN | 4.21 Hz             |
| POINT | 26214               |
| FREQU | 31446.54 Hz         |
| SCANS | 291                 |
| ACQTM | 0.8336 sec          |
| PD    | 2.0000 sec          |
| PW1   | 3.40 usec           |
| IRNUC | <sup>1</sup> H      |
| CTEMP | 21.9 c              |
| SLVNT | CDCL <sub>3</sub>   |
| EXREF | 77.00 ppm           |
| BF    | 0.12 Hz             |
| RGAIN | 60                  |

C:\Users\alice\Desktop\ChenTM NMR\2z'\_proton.als

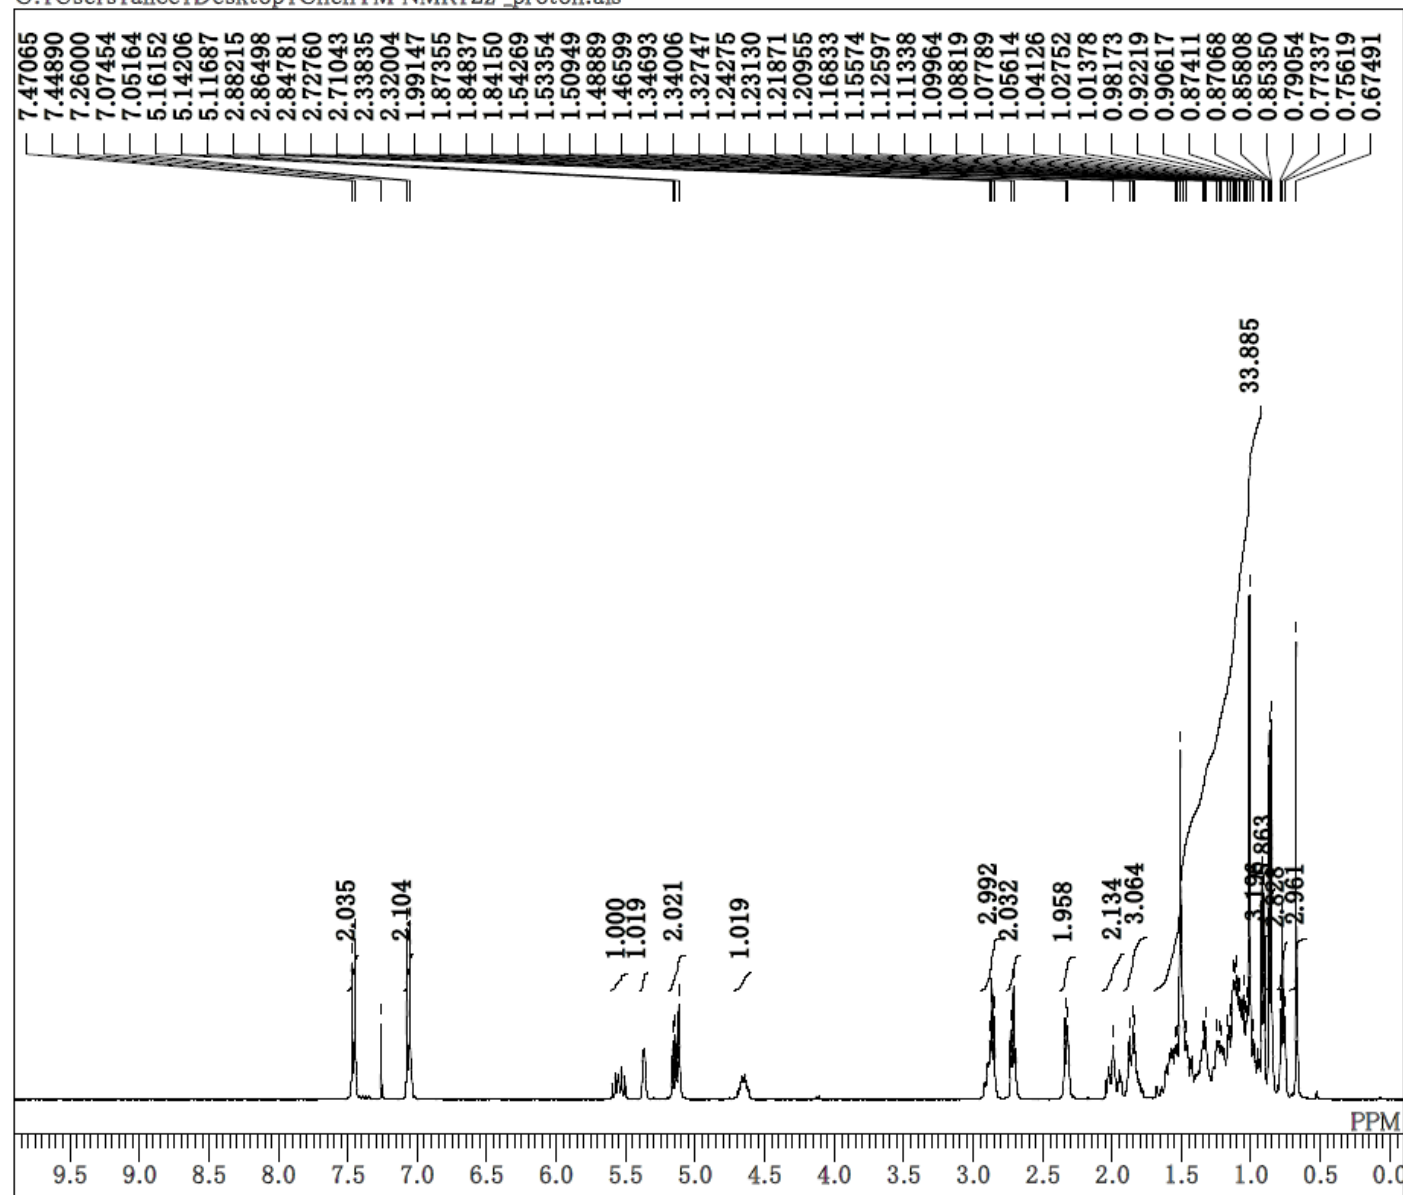

DFILE  
COMNT  
DATIM  
OBNUC  
EXMOD  
OBFRQ  
OBSET  
OBFIN  
POINT  
FREQU  
SCANS  
ACQTM  
PD  
PW1  
IRNUC  
CTEMP  
SLVNT  
EXREF  
BF  
RGAIN

2z'\_proton.als  
31-03-2020 02:28:36  
1H  
proton.jxp  
391.78 MHz  
8.51 KHz  
3.34 Hz  
13107  
5878.90 Hz  
8  
2.2295 sec  
6.0000 sec  
5.17 usec  
1H  
20.2 c  
CDCL3  
7.26 ppm  
0.12 Hz  
26

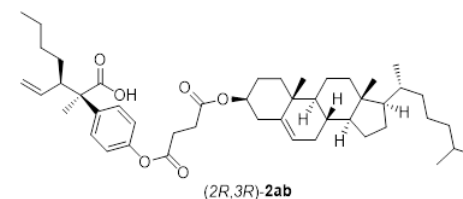



C:\Users\alice\Desktop\ChenTM NMR\2z'\_carbon.als

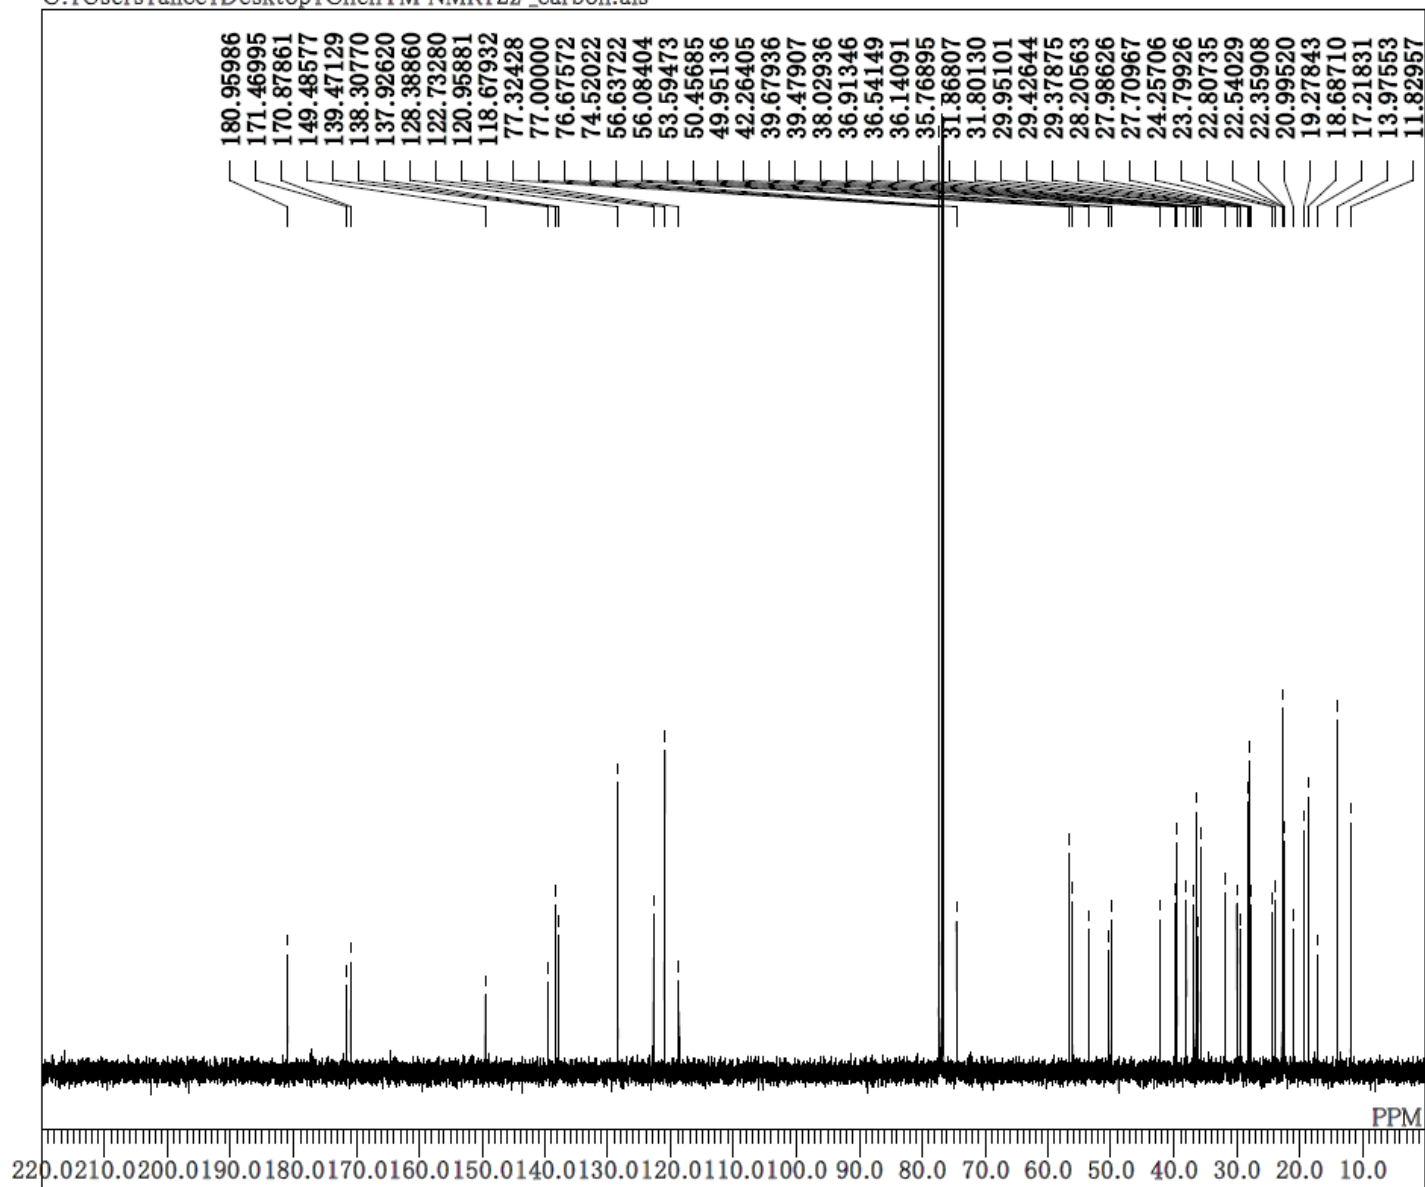

DFILE  
COMNT  
DATIM  
OBNUC  
EXMOD  
OBFRQ  
OBSET  
OBFIN  
POINT  
FREQU  
SCANS  
ACQTM  
PD  
PW1  
IRNUC  
CTEMP  
SLVNT  
EXREF  
BF  
RGAIN

2z'\_carbon.als  
31-03-2020 02:37:05  
13C  
carbon.jpg  
98.52 MHz  
4.64 KHz  
8.74 Hz  
26214  
24630.54 Hz  
241  
1.0643 sec  
2.0000 sec  
3.12 usec  
1H  
20.6 c  
CDCL3  
77.00 ppm  
0.12 Hz  
60



C:\Users\alice\Desktop\ChenTM NMR\2aa\_proton.als

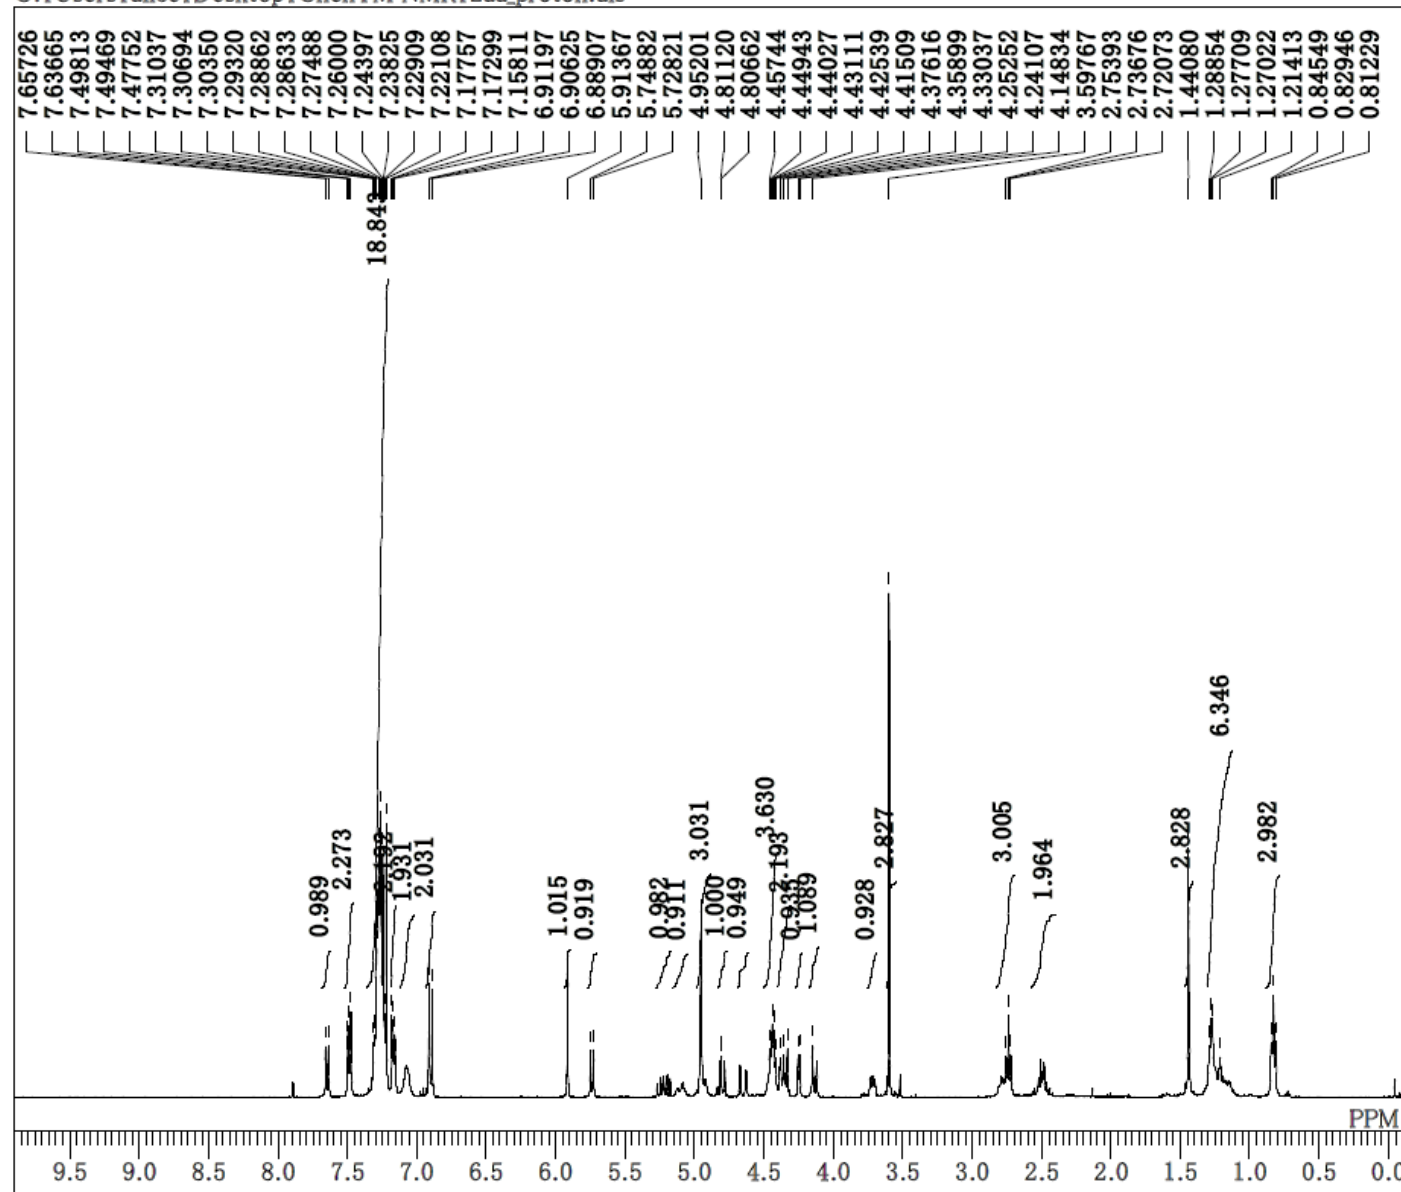

DFILE 2aa\_proton.als  
 COMNT  
 DATIM 20-01-2020 18:53:52  
 OBNUC <sup>1</sup>H  
 EXMOD proton.jxp  
 OBFRQ 391.78 MHz  
 OBSET 8.51 KHz  
 OBFIN 3.34 Hz  
 POINT 13107  
 FREQU 5878.90 Hz  
 SCANS 8  
 ACQTM 2.2295 sec  
 PD 6.0000 sec  
 PW1 5.17 usec  
 IRNUC <sup>1</sup>H  
 CTEMP 20.2 c  
 SLVNT CDCL<sub>3</sub>  
 EXREF 7.26 ppm  
 BF 0.12 Hz  
 RGAIN 38

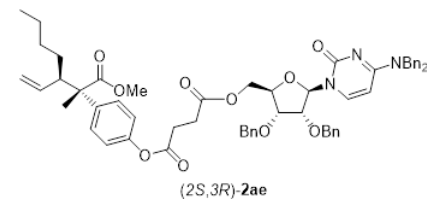

C:\Users\Valice\Desktop\ChenTM NMR\2aa\_carbon.als

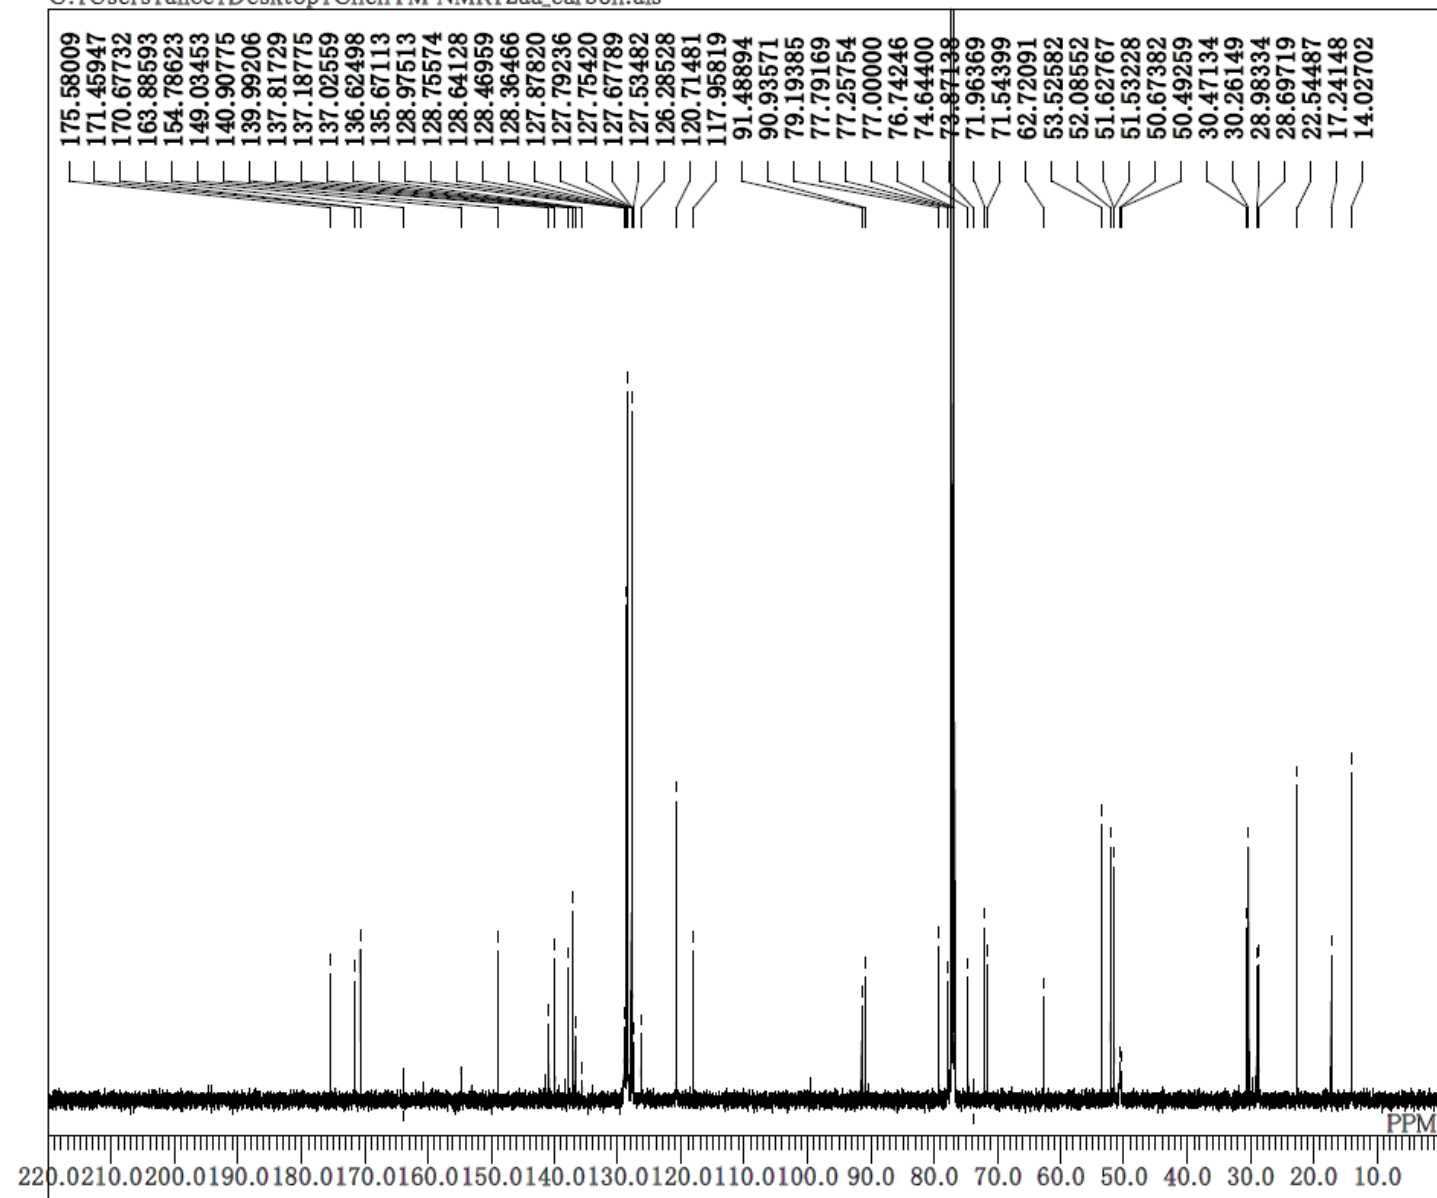

DFILE 2aa\_carbon.als  
 COMNT  
 DATIM 2020-01-21 23:21:18  
 OBNUC 13C  
 EXMOD carbon.jpg  
 OBFRQ 125.77 MHz  
 OBSET 7.87 KHz  
 OBFIN 4.21 Hz  
 POINT 26214  
 FREQU 31446.54 Hz  
 SCANS 12943  
 ACQTM 0.8336 sec  
 PD 2.0000 sec  
 PW1 3.40 usec  
 IRNUC 1H  
 CTEMP 22.1 c  
 SLVNT CDCL3  
 EXREF 77.00 ppm  
 BF 0.12 Hz  
 RGAIN 60

C:\Users\Valice\Desktop\ChenTM NMR\2aa'\_proton.als

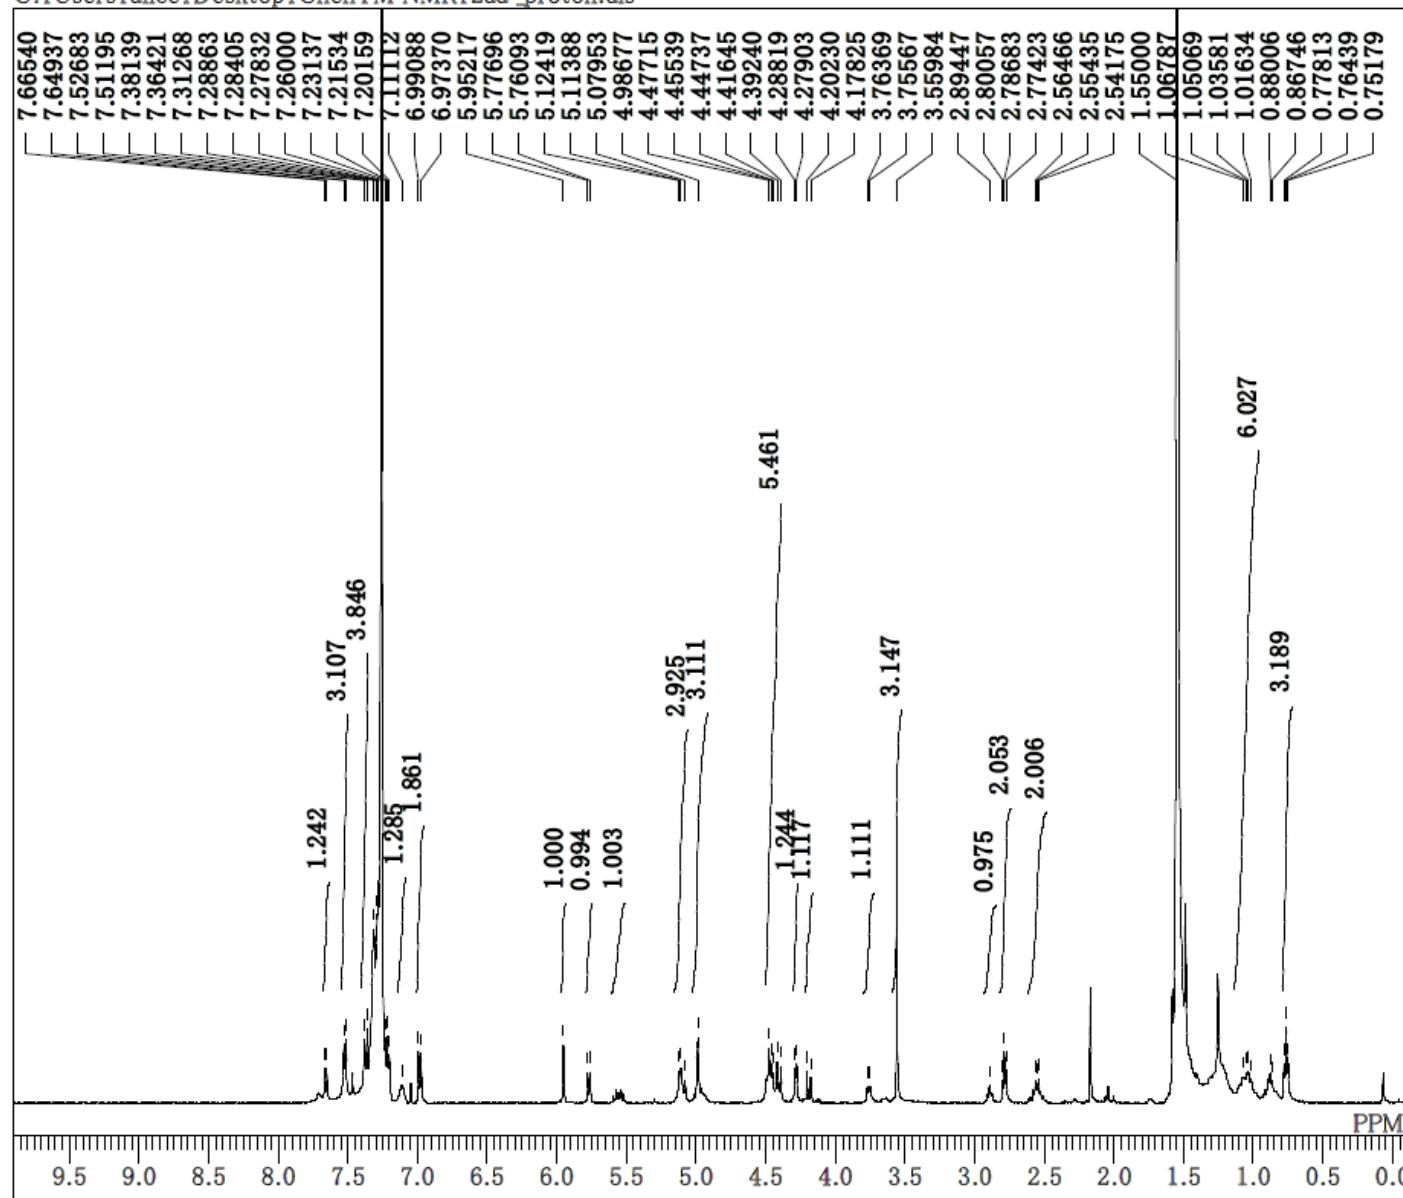

DFILE  
COMNT  
DATIM  
OBNUC  
EXMOD  
OBFRQ  
OBSET  
OBFIN  
POINT  
FREQU  
SCANS  
ACQTM  
PD  
PW1  
IRNUC  
CTEMP  
SLVNT  
EXREF  
BF  
RGAIN

2aa'\_proton.als  
2020-06-16 19:58:32  
1H  
proton.jxp  
500.16 MHz  
2.41 KHz  
6.01 Hz  
13107  
7507.51 Hz  
256  
1.7459 sec  
6.0000 sec  
5.55 usec  
1H  
25.0 c  
CDCL3  
7.26 ppm  
1.20 Hz  
44

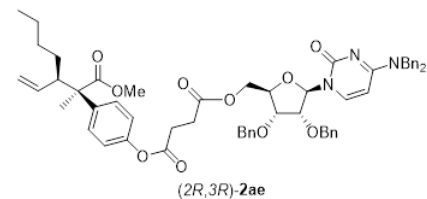

C:\Users\valice\Desktop\ChenTM NMR\2aa'\_carbon.als

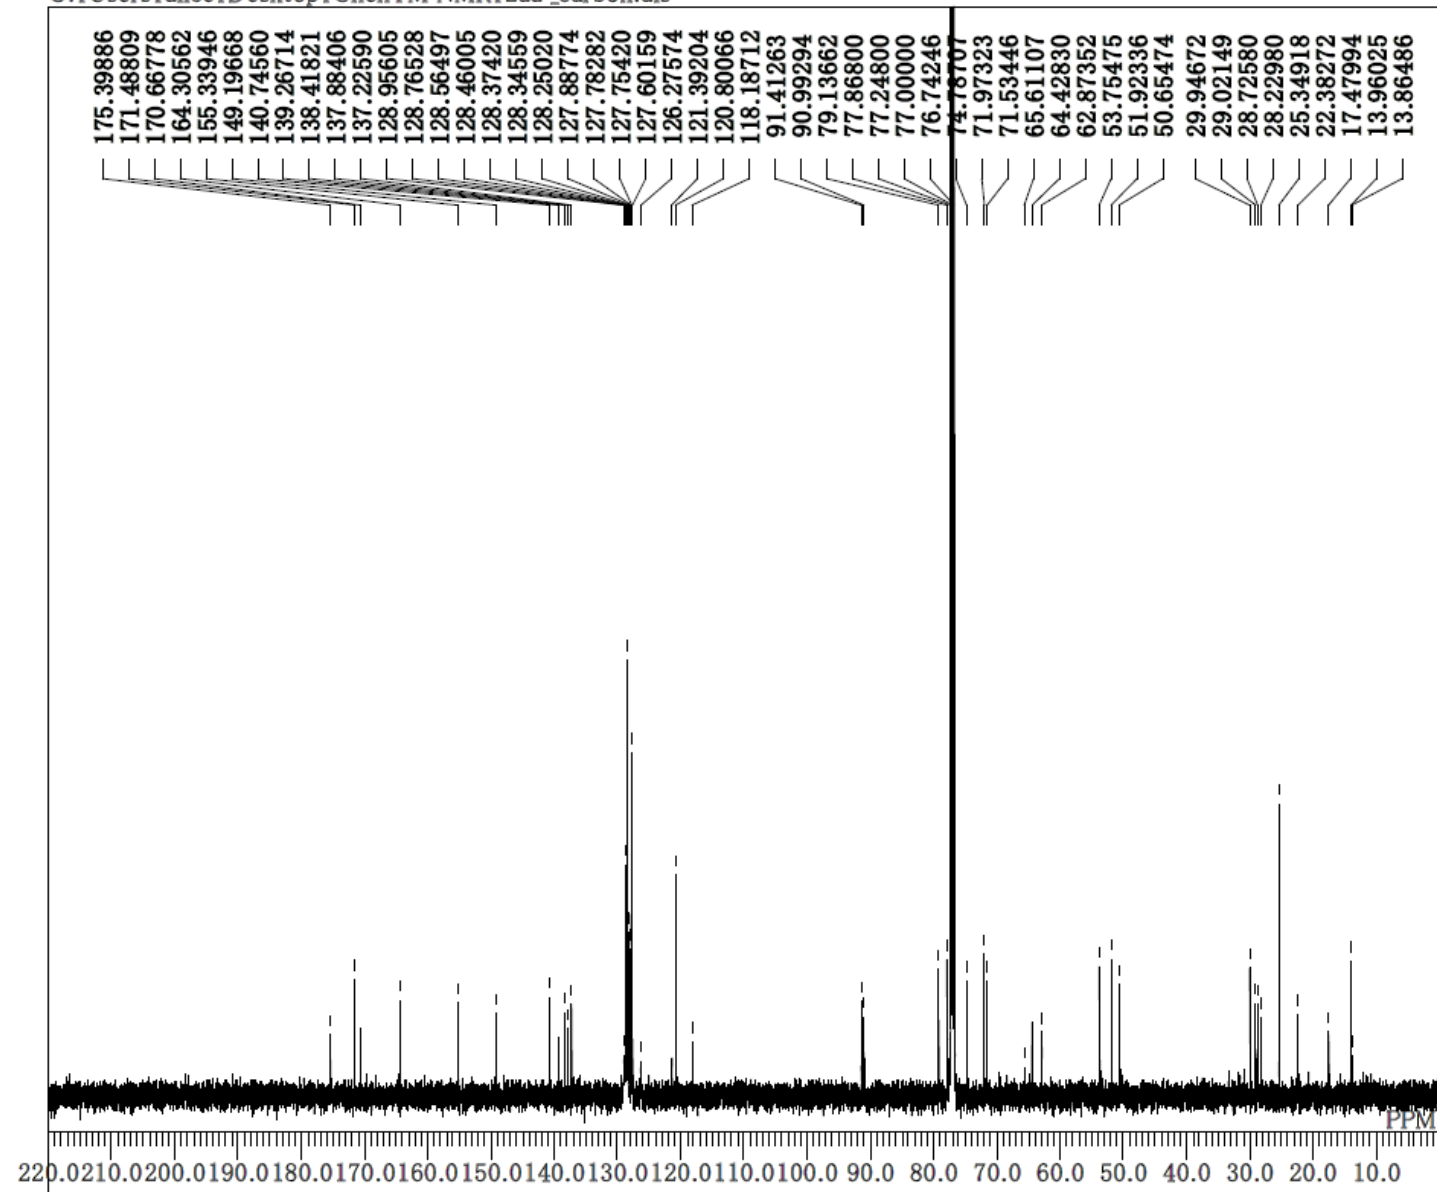

DFILE 2aa'\_carbon.als  
 COMNT  
 DATIM 2020-06-16 21:00:21  
 OBNUC 13C  
 EXMOD carbon.jxp  
 OBFRQ 125.77 MHz  
 OBSET 7.87 KHz  
 OBFIN 4.21 Hz  
 POINT 26214  
 FREQU 31446.54 Hz  
 SCANS 18211  
 ACQTM 0.8336 sec  
 PD 2.0000 sec  
 PW1 3.40 usec  
 IRNUC 1H  
 CTEMP 25.0 c  
 SLVNT CDCL3  
 EXREF 77.00 ppm  
 BF 0.12 Hz  
 RGAIN 60

C:\Users\valice\Desktop\Gousei\Chen\Chen\_SM2\2ad\_proton.als

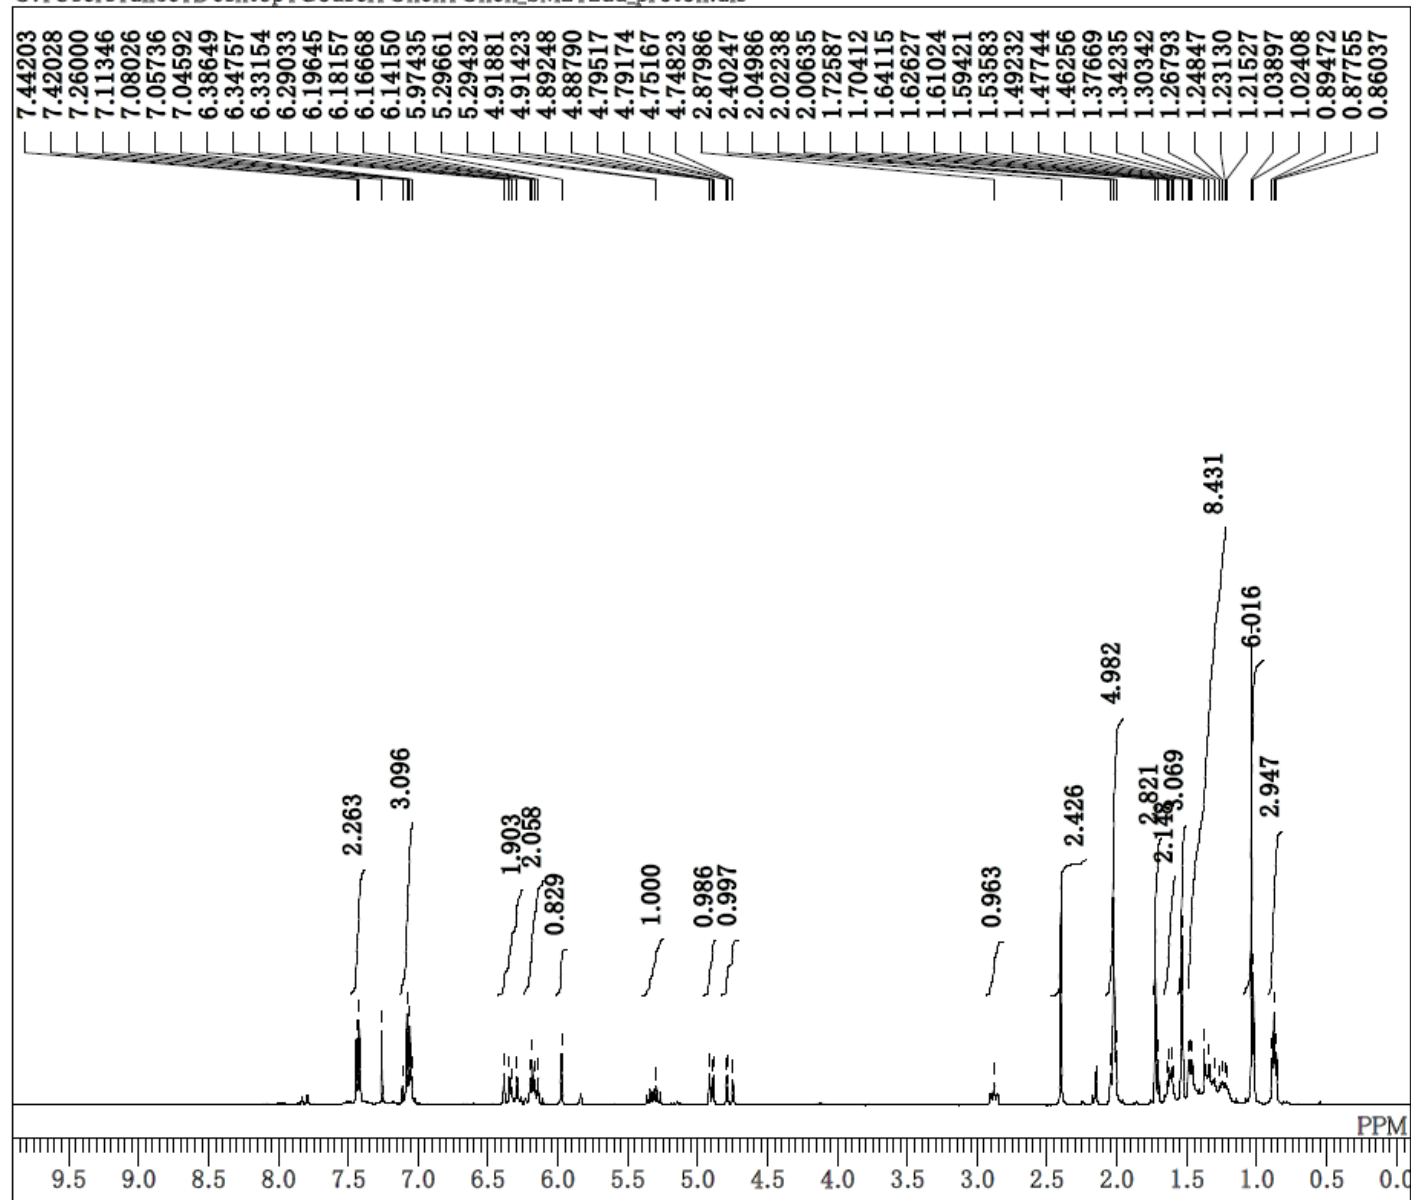

2ad\_proton.als  
21-10-2020 21:51:41  
1H  
proton.jxp  
391.78 MHz  
8.51 KHz  
3.34 Hz  
13107  
5878.90 Hz  
8  
2.2295 sec  
6.0000 sec  
5.17 usec  
1H  
20.8 c  
CDCL3  
7.26 ppm  
0.12 Hz  
32

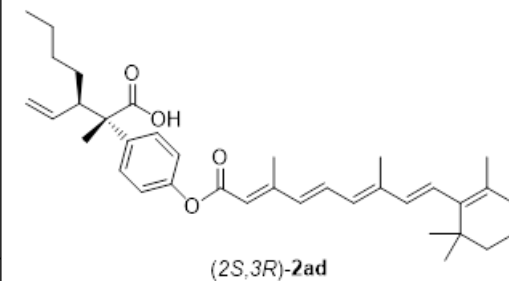

C:\Users\Valice\Desktop\Gousei\Chen\Chen\_SM2\2ad\_carbon.als

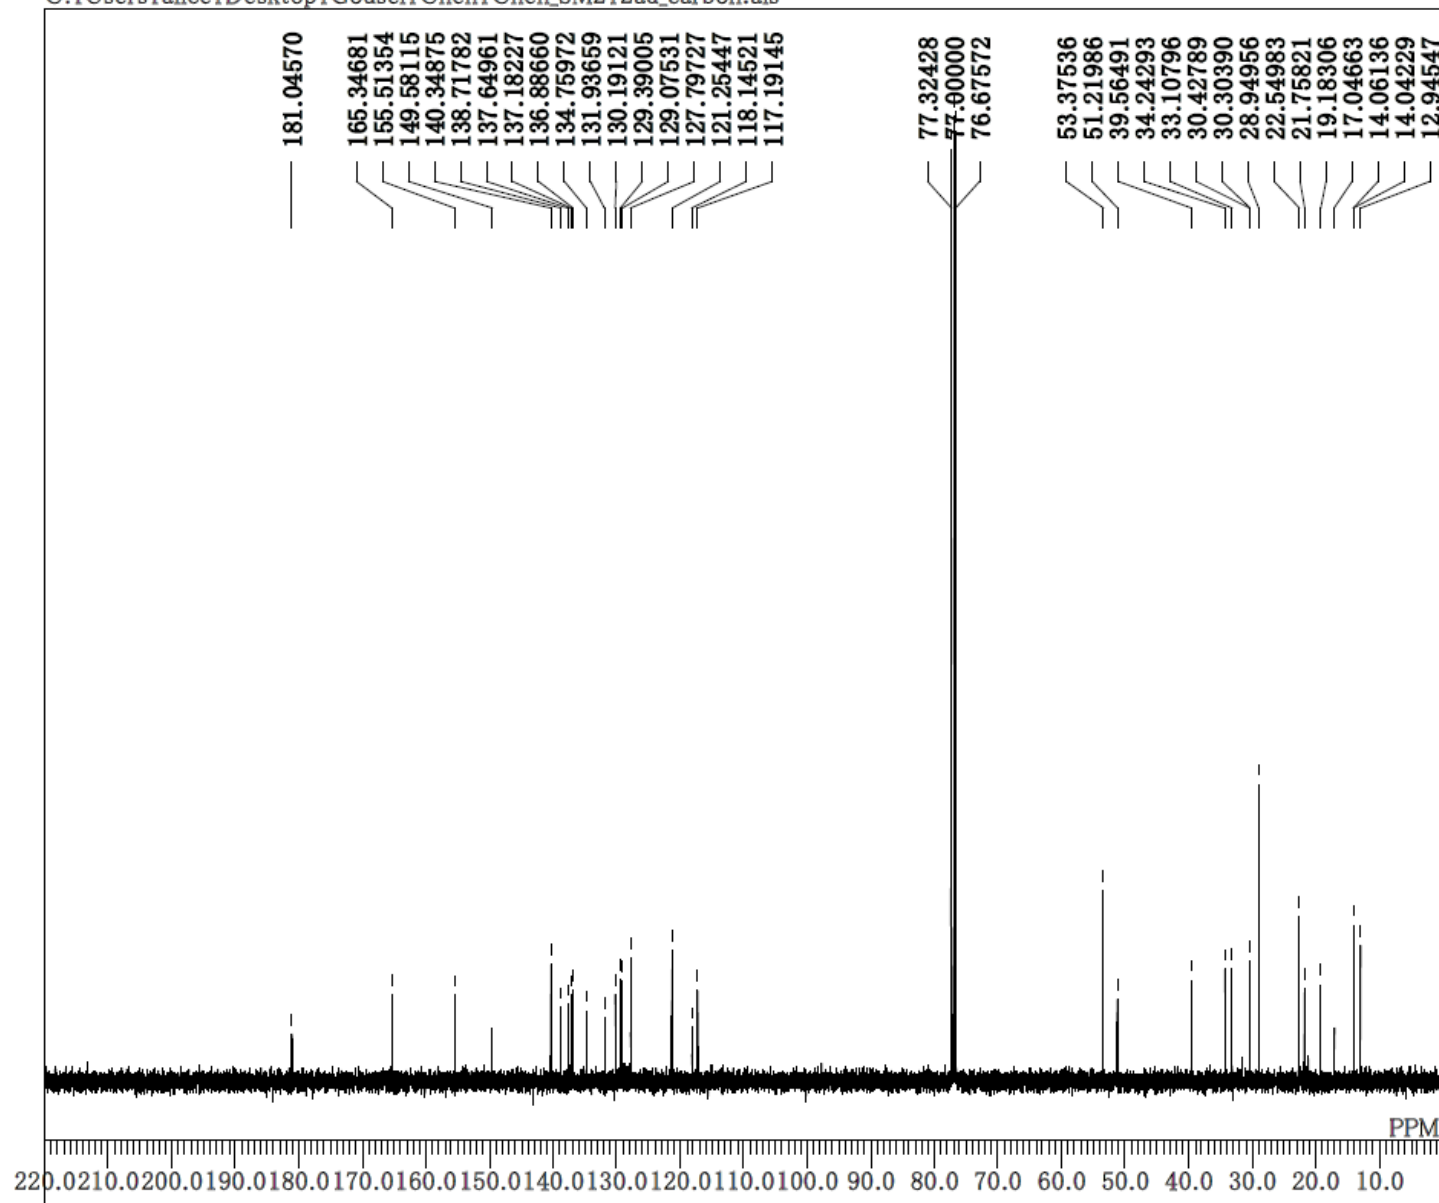

DFILE 2ad\_carbon.als  
 COMNT  
 DATIM 21-10-2020 21:55:02  
 OBNUC 13C  
 EXMOD carbon.jxp  
 OBFRQ 98.52 MHz  
 OBSET 4.64 KHz  
 OBFIN 8.74 Hz  
 POINT 26214  
 FREQU 24630.54 Hz  
 SCANS 353  
 ACQTM 1.0643 sec  
 PD 2.0000 sec  
 PW1 3.12 usec  
 IRNUC 1H  
 CTEMP 21.1 c  
 SLVNT CDCL3  
 EXREF 77.00 ppm  
 BF 0.12 Hz  
 RGAIN 60

C:\Users\valice\Desktop\Gousei\Chen\Chen\_SM2\2ad'\_proton-1-1.als

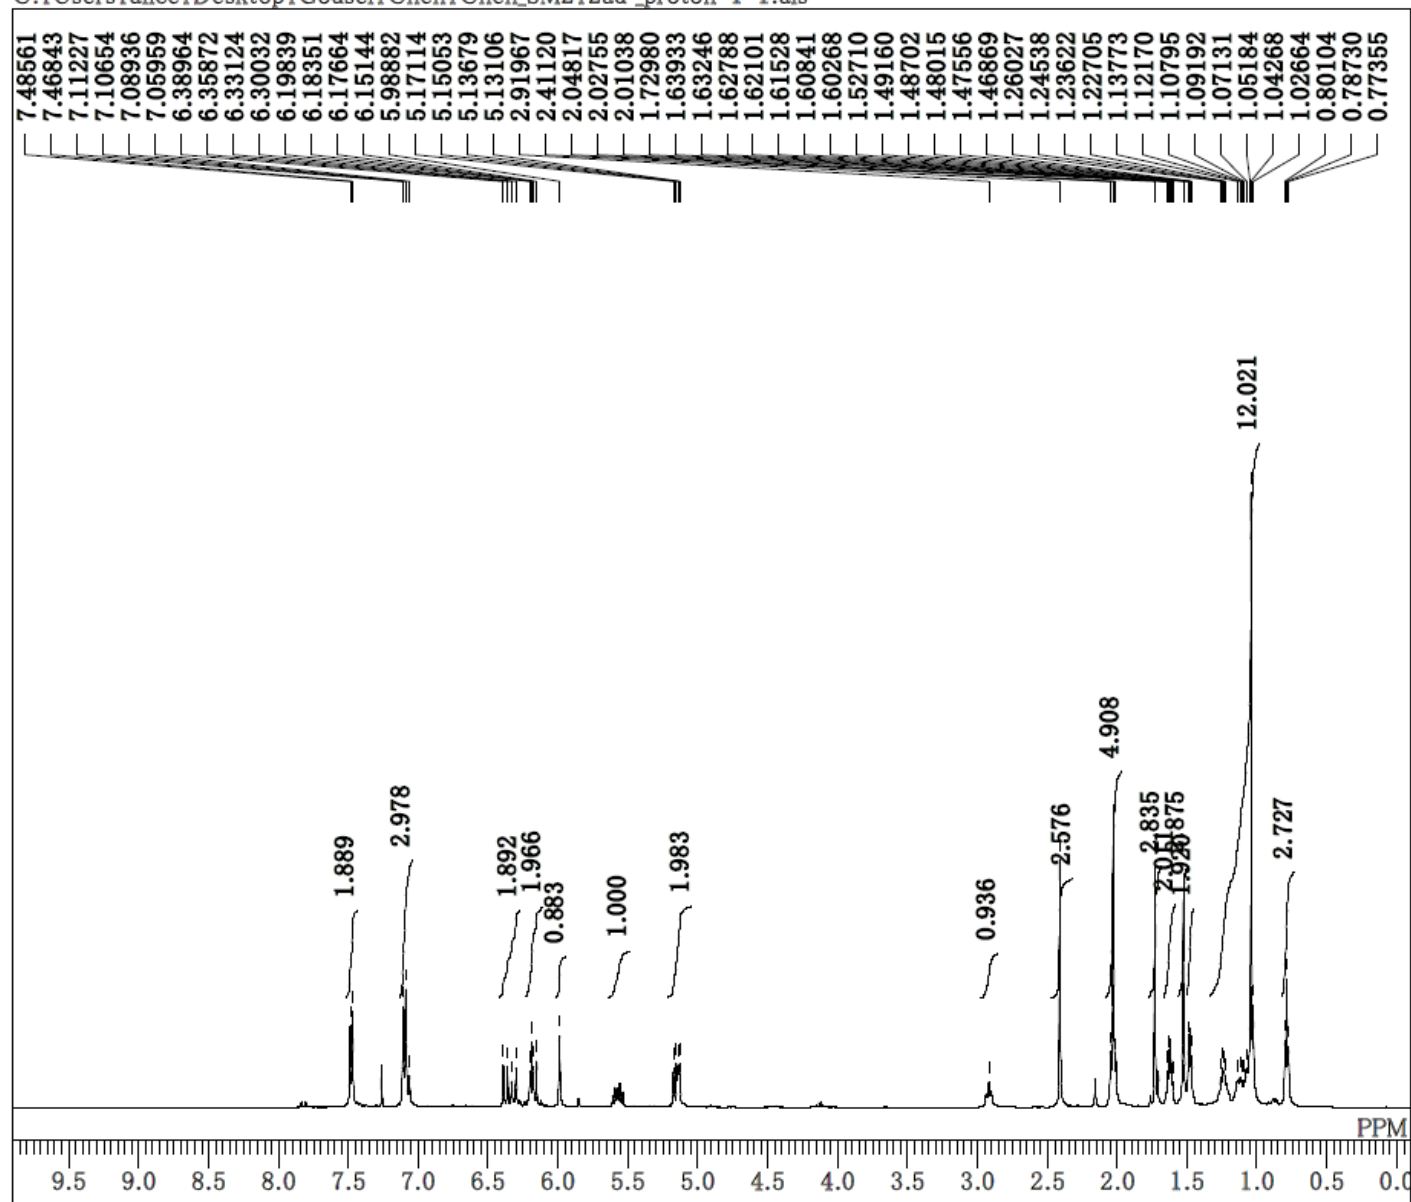

DFILE 2ad'\_proton-1-1.als  
 COMNT  
 DATIM 2020-10-15 13:15:60  
 OBNUC 1H  
 EXMOD proton.jxp  
 OBFRQ 500.16 MHz  
 OBSET 2.41 KHz  
 OBFIN 6.01 Hz  
 POINT 13107  
 FREQU 7507.51 Hz  
 SCANS 8  
 ACQTM 1.7459 sec  
 PD 6.0000 sec  
 PW1 5.55 usec  
 IRNUC 1H  
 CTEMP 21.9 c  
 SLVNT CDCL3  
 EXREF 7.26 ppm  
 BF 0.62 Hz  
 RGAIN 36

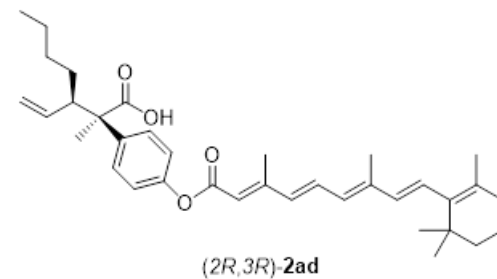



C:\Users\Valice\Desktop\Gousei\Chen\Chen\_SM2\2ad'\_carbon-1-1.als

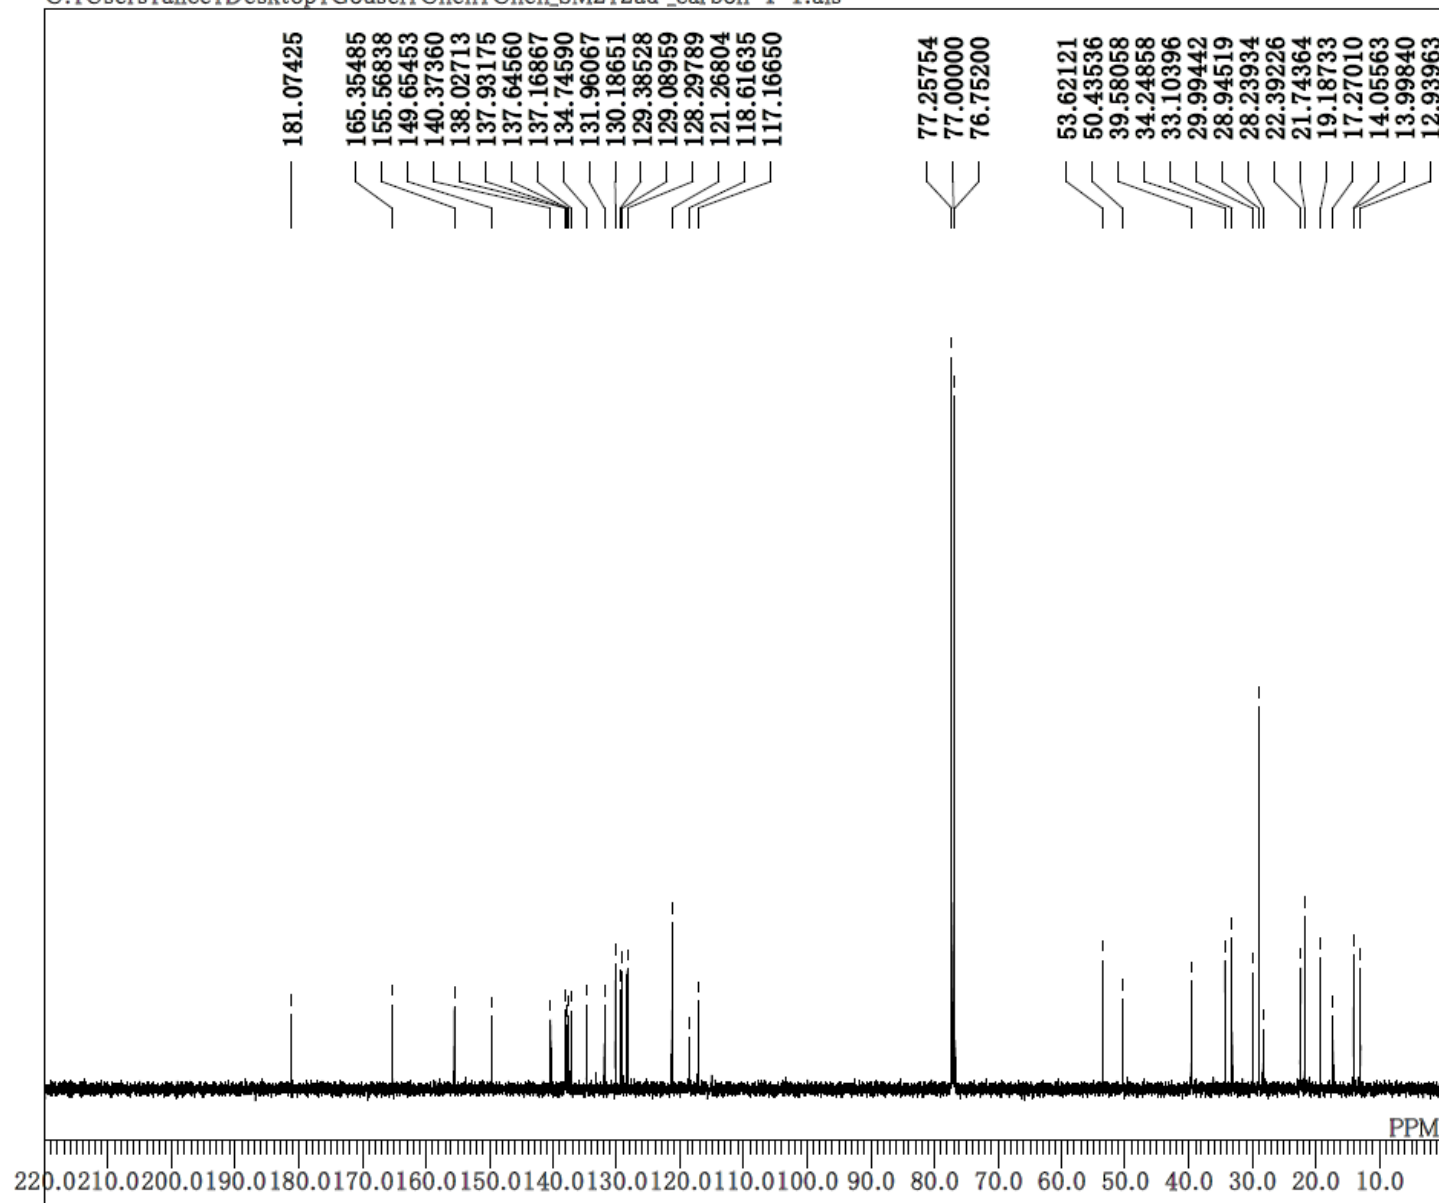

DFILE 2ad'\_carbon-1-1.als  
 COMNT  
 DATIM 2020-10-15 13:02:24  
 OBNUC 13C  
 EXMOD carbon.jxp  
 OBFRQ 125.77 MHz  
 OBSET 7.87 KHz  
 OBFIN 4.21 Hz  
 POINT 26214  
 FREQU 31446.54 Hz  
 SCANS 256  
 ACQTM 0.8336 sec  
 PD 2.0000 sec  
 PW1 3.40 usec  
 IRNUC 1H  
 CTEMP 22.0 c  
 SLVNT CDCL3  
 EXREF 77.00 ppm  
 BF 0.62 Hz  
 RGAIN 60



L4\_proton-1-1.als

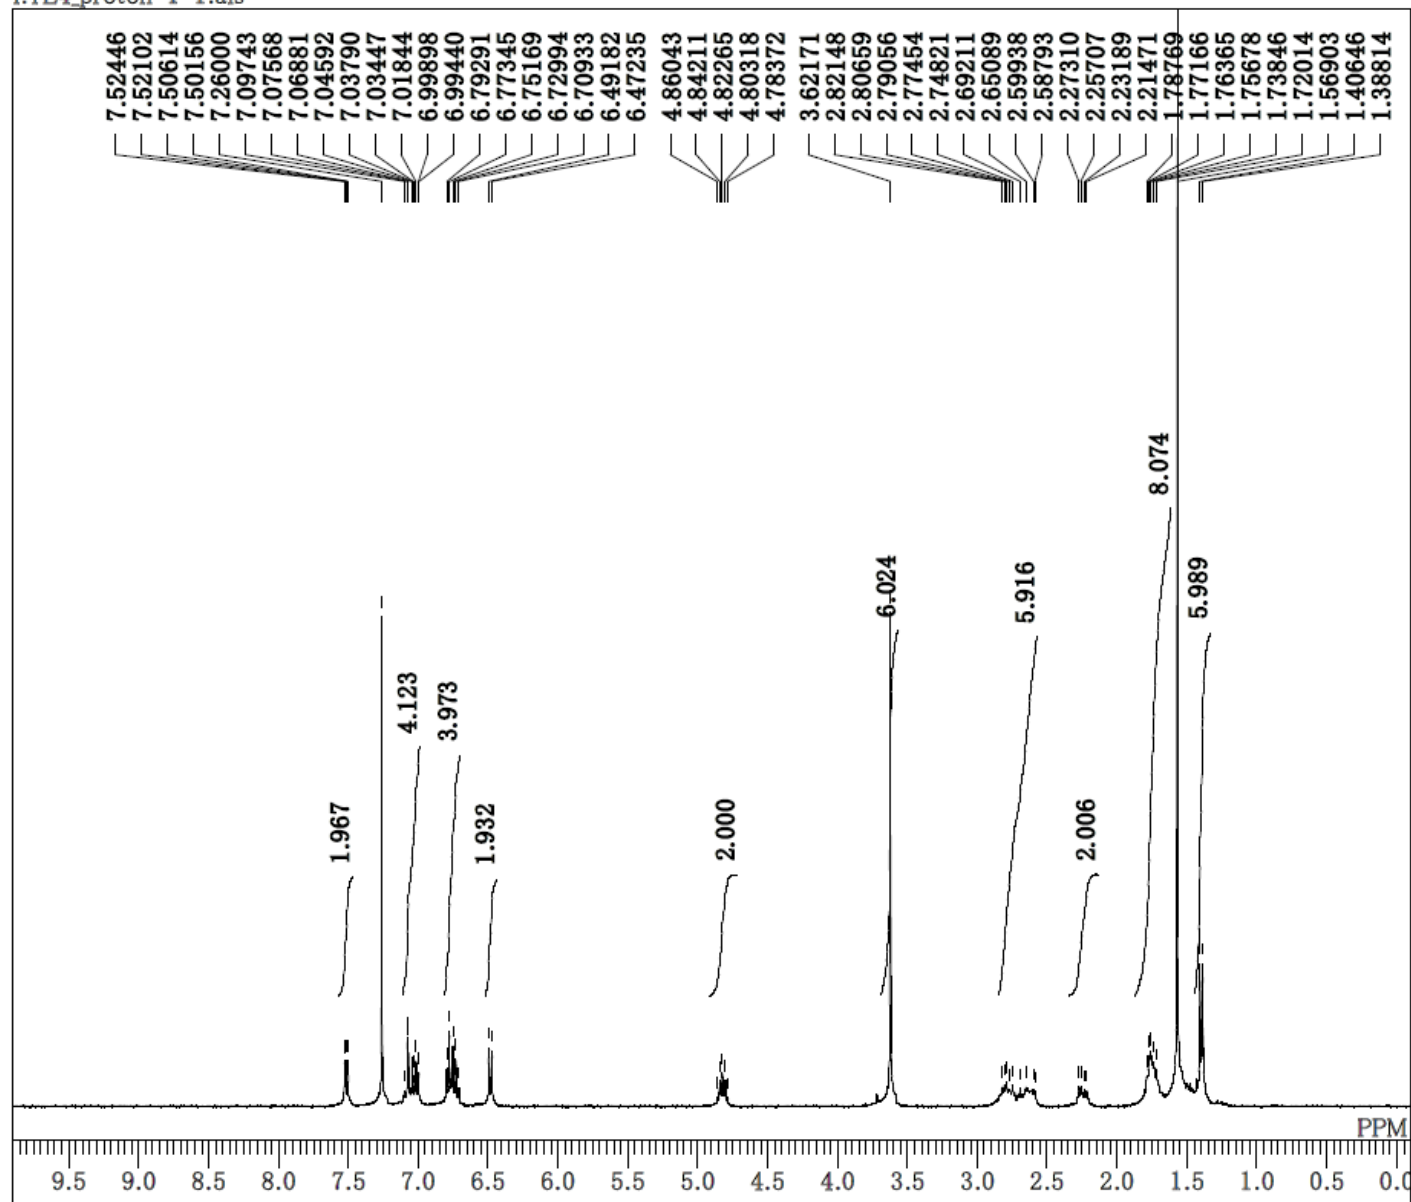

DFILE L4\_proton-1-1.als  
 COMNT  
 DATIM 30-06-2020 16:56:40  
 OBNUC 1H  
 EXMOD proton.jxp  
 OBFRQ 391.78 MHz  
 OBSET 8.51 KHz  
 OBFIN 3.34 Hz  
 POINT 13107  
 FREQU 5878.90 Hz  
 SCANS 8  
 ACQTM 2.2295 sec  
 PD 6.0000 sec  
 PW1 5.17 usec  
 IRNUC 1H  
 CTEMP 20.9 c  
 SLVNT CDCL3  
 EXREF 7.26 ppm  
 BF 0.12 Hz  
 RGAIN 46

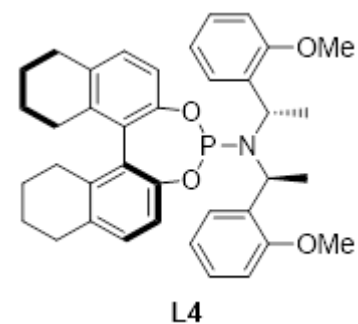

I:\L4\_carobn-1-1.jdf

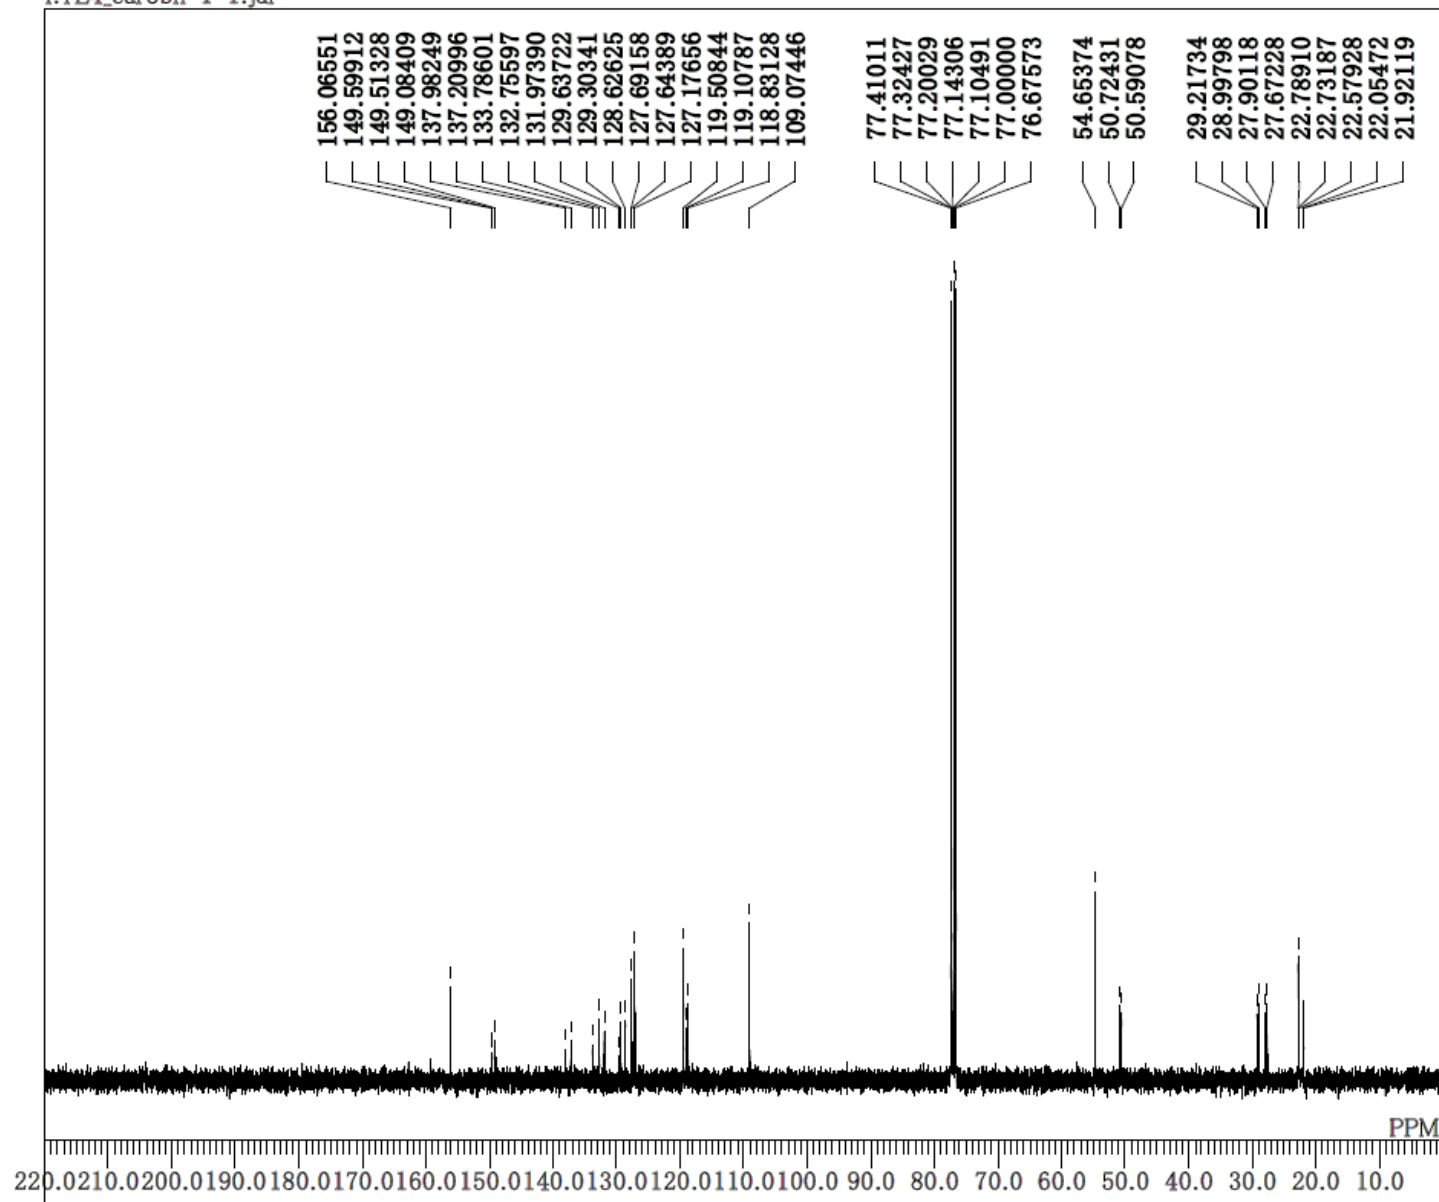

DFILE L4\_carobn-1-1.jdf  
 COMNT  
 DATIM 2020-06-30 17:02:27  
 OBNUC 13C  
 EXMOD carbon.jxp  
 OBFRQ 98.52 MHz  
 OBSET 4.64 KHz  
 OBFIN 8.74 Hz  
 POINT 32767  
 FREQU 30788.18 Hz  
 SCANS 701  
 ACQTM 1.0643 sec  
 PD 2.0000 sec  
 PW1 3.12 usec  
 IRNUC 1H  
 CTEMP 21.1 c  
 SLVNT CDCL3  
 EXREF 77.00 ppm  
 BF 0.32 Hz  
 RGAIN 60

I:\L4\_P-1-1.als

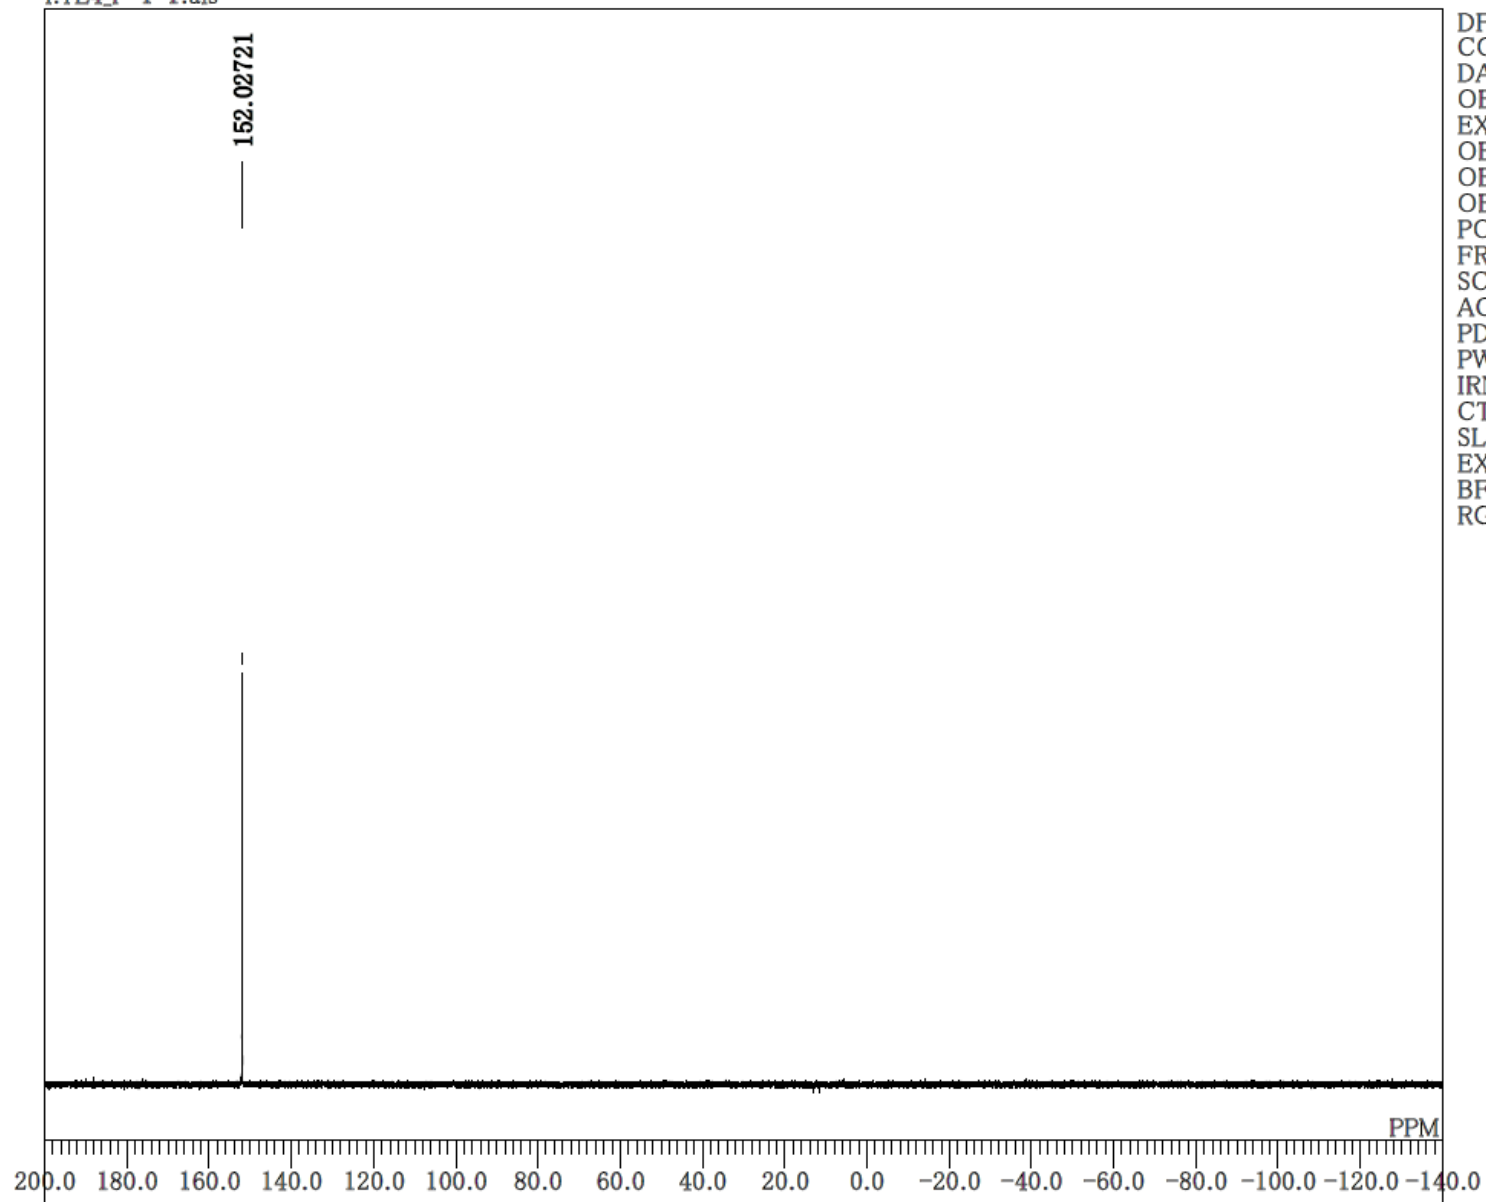

DFILE L4\_P-1-1.als  
COMNT  
DATIM 30-06-2020 17:40:53  
OBNUC 31P  
EXMOD carbon.jxp  
OBFRQ 158.59 MHz  
OBSET 7.99 KHz  
OBFIN 9.23 Hz  
POINT 26214  
FREQU 64102.56 Hz  
SCANS 101  
ACQTM 0.4089 sec  
PD 2.0000 sec  
PW1 4.80 usec  
IRNUC 1H  
CTEMP 21.2 c  
SLVNT CDCL3  
EXREF 0.00 ppm  
BF 0.32 Hz  
RGAIN 56

C:\Users\alice\Desktop\Chen ligand\L5\_proton.als

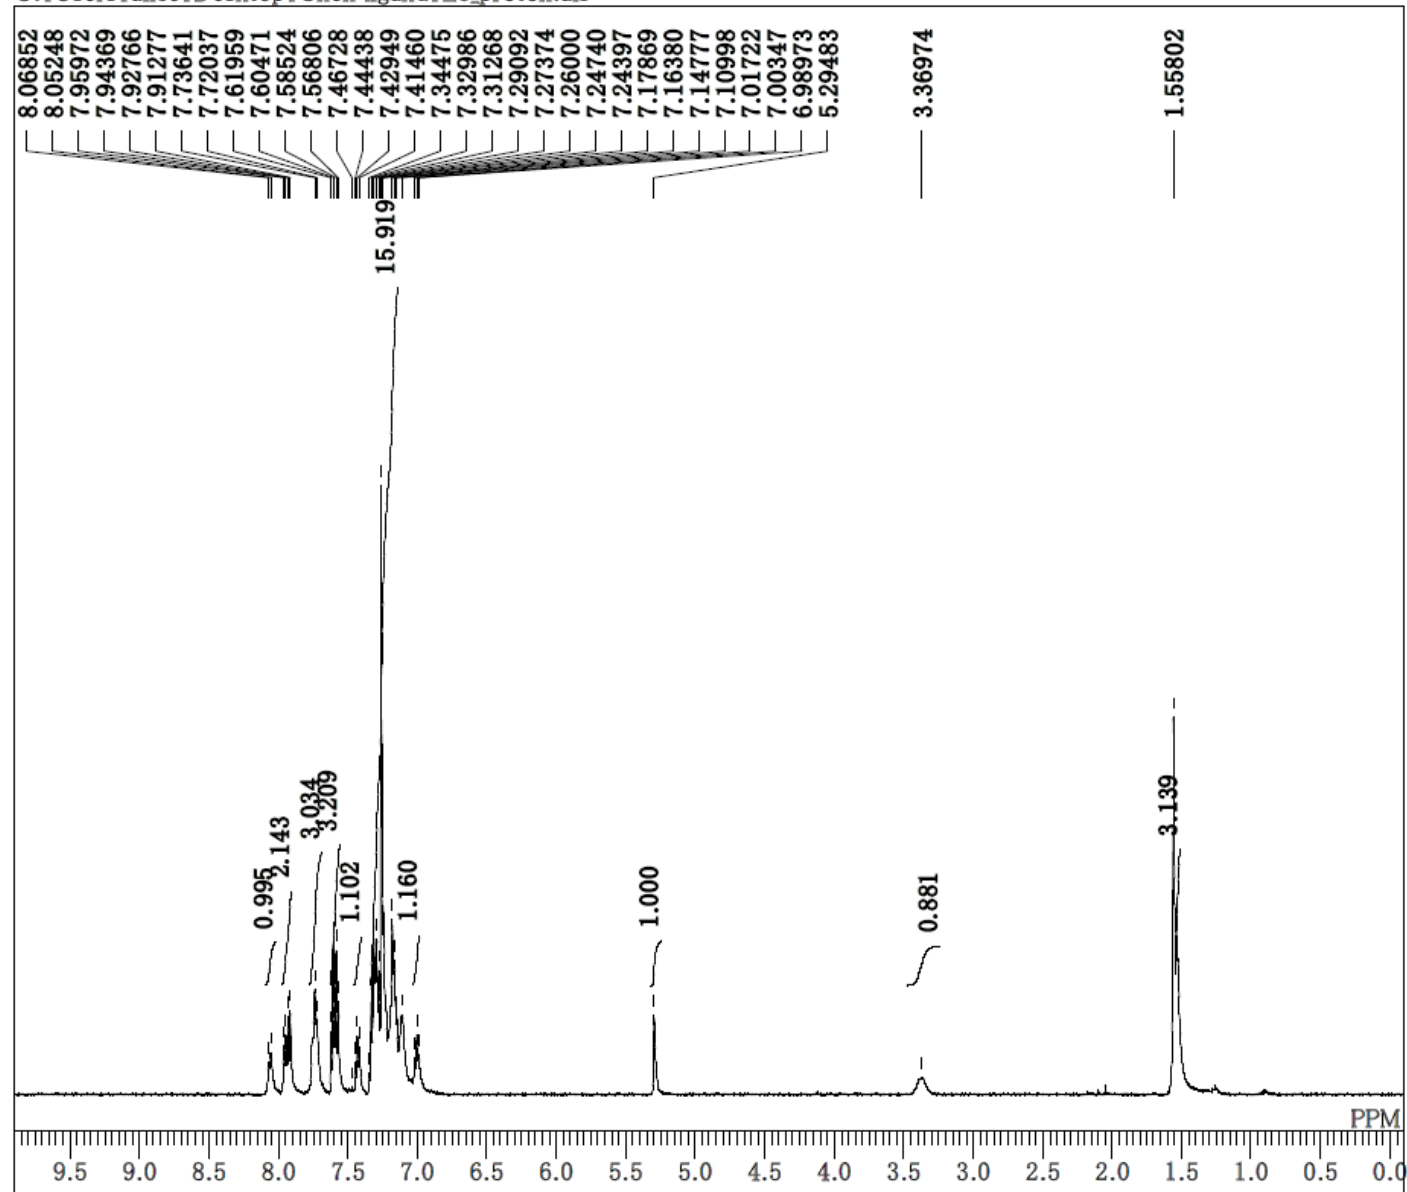

DFILE L5\_proton.als  
 COMNT  
 DATIM 2019-08-19 14:28:30  
 OBNUC 1H  
 EXMOD proton.jxp  
 OBFRQ 500.16 MHz  
 OBSET 2.41 KHz  
 OBFIN 6.01 Hz  
 POINT 13107  
 FREQU 7507.51 Hz  
 SCANS 8  
 ACQTM 1.7459 sec  
 PD 6.0000 sec  
 PW1 5.55 usec  
 IRNUC 1H  
 CTEMP 21.5 c  
 SLVNT CDCL3  
 EXREF 7.26 ppm  
 BF 0.12 Hz  
 RGAIN 40

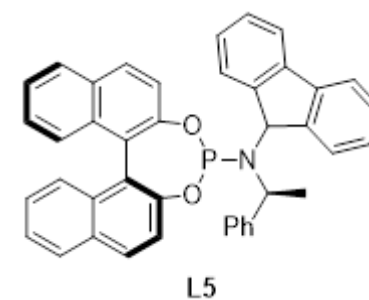

C:\Users\alice\Desktop\Chen ligand\L5\_carbon.als

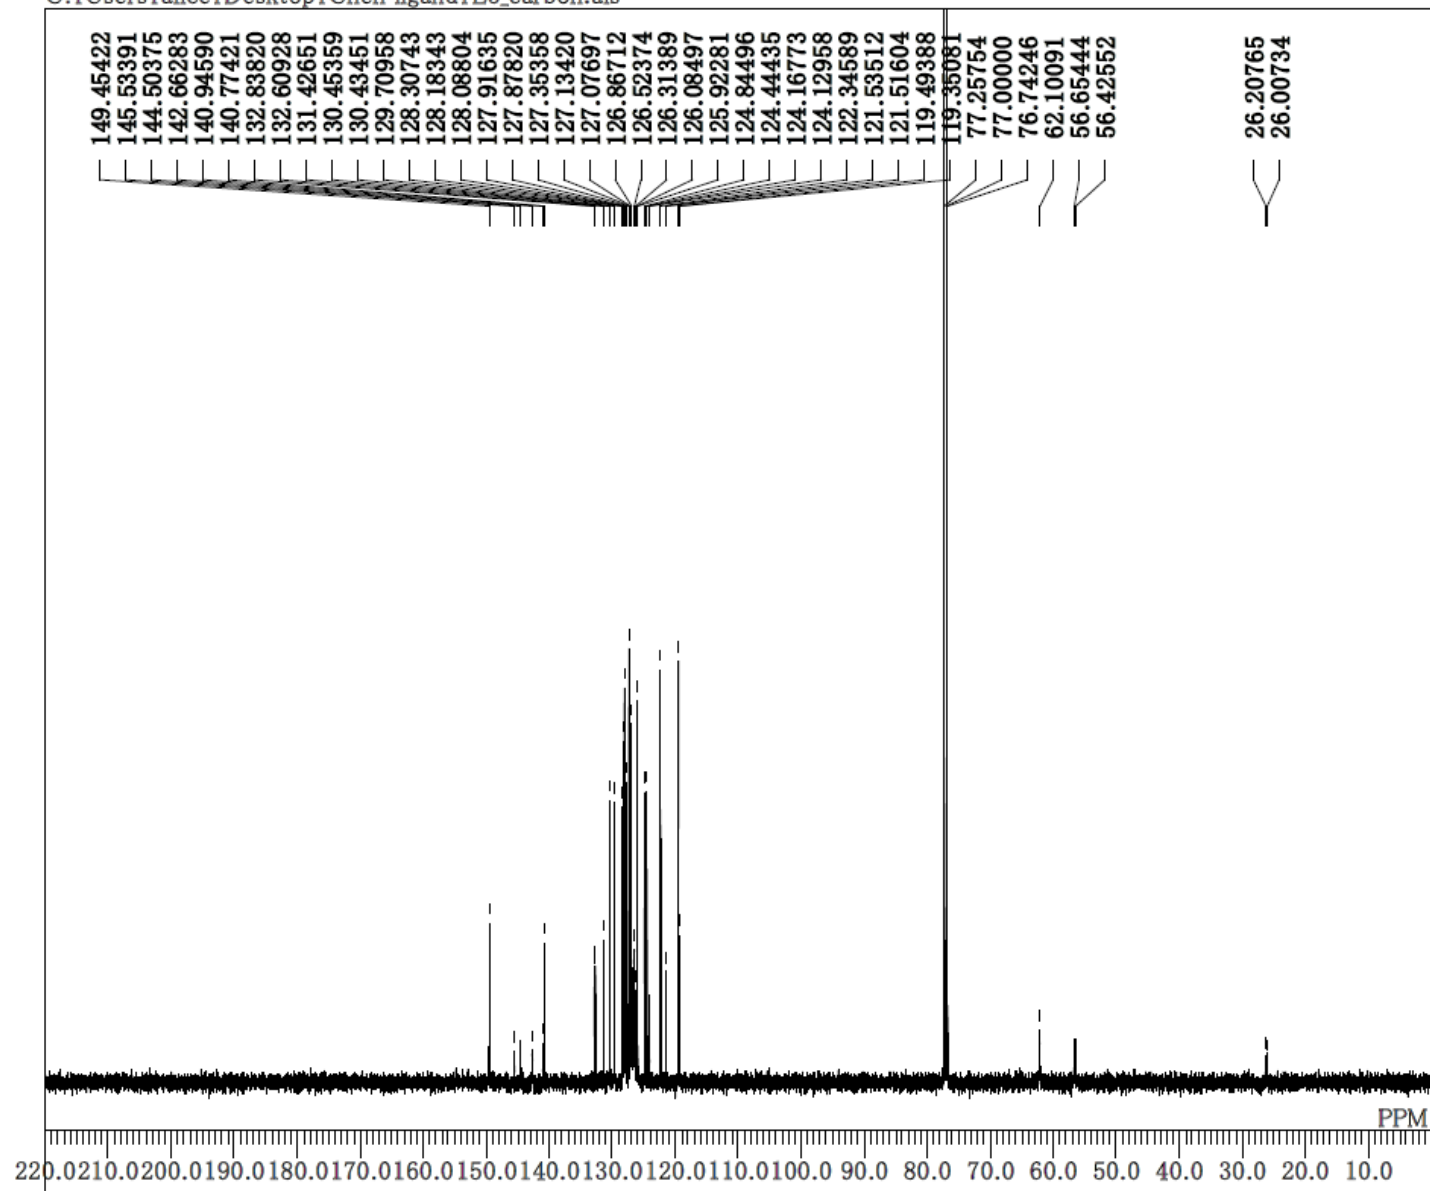

|       |                     |
|-------|---------------------|
| DFILE | L5_carbon.als       |
| COMNT |                     |
| DATIM | 2020-04-16 20:23:02 |
| OBNUC | <sup>13</sup> C     |
| EXMOD | carbon.jxp          |
| OBFRQ | 125.77 MHz          |
| OBSET | 7.87 KHz            |
| OBFIN | 4.21 Hz             |
| POINT | 26214               |
| FREQU | 31446.54 Hz         |
| SCANS | 620                 |
| ACQTM | 0.8336 sec          |
| PD    | 2.0000 sec          |
| PW1   | 3.40 usec           |
| IRNUC | <sup>1</sup> H      |
| CTEMP | 21.5 c              |
| SLVNT | CDCL <sub>3</sub>   |
| EXREF | 77.00 ppm           |
| BF    | 0.12 Hz             |
| RGAIN | 60                  |

C:\Users\alice\Desktop\Chen ligand\L5\_P.als

DFILE L5\_P.als  
COMNT  
DATIM 09-05-2020 02:59:27  
OBNUC 31P  
EXMOD carbon.jxp  
OBFRQ 158.59 MHz  
OBSET 7.99 KHz  
OBFIN 9.23 Hz  
POINT 26214  
FREQU 64102.56 Hz  
SCANS 100  
ACQTM 0.4089 sec  
PD 2.0000 sec  
PW1 4.80 usec  
IRNUC 1H  
CTEMP 20.8 c  
SLVNT CDCL3  
EXREF -6.00 ppm  
BF 0.12 Hz  
RGAIN 56

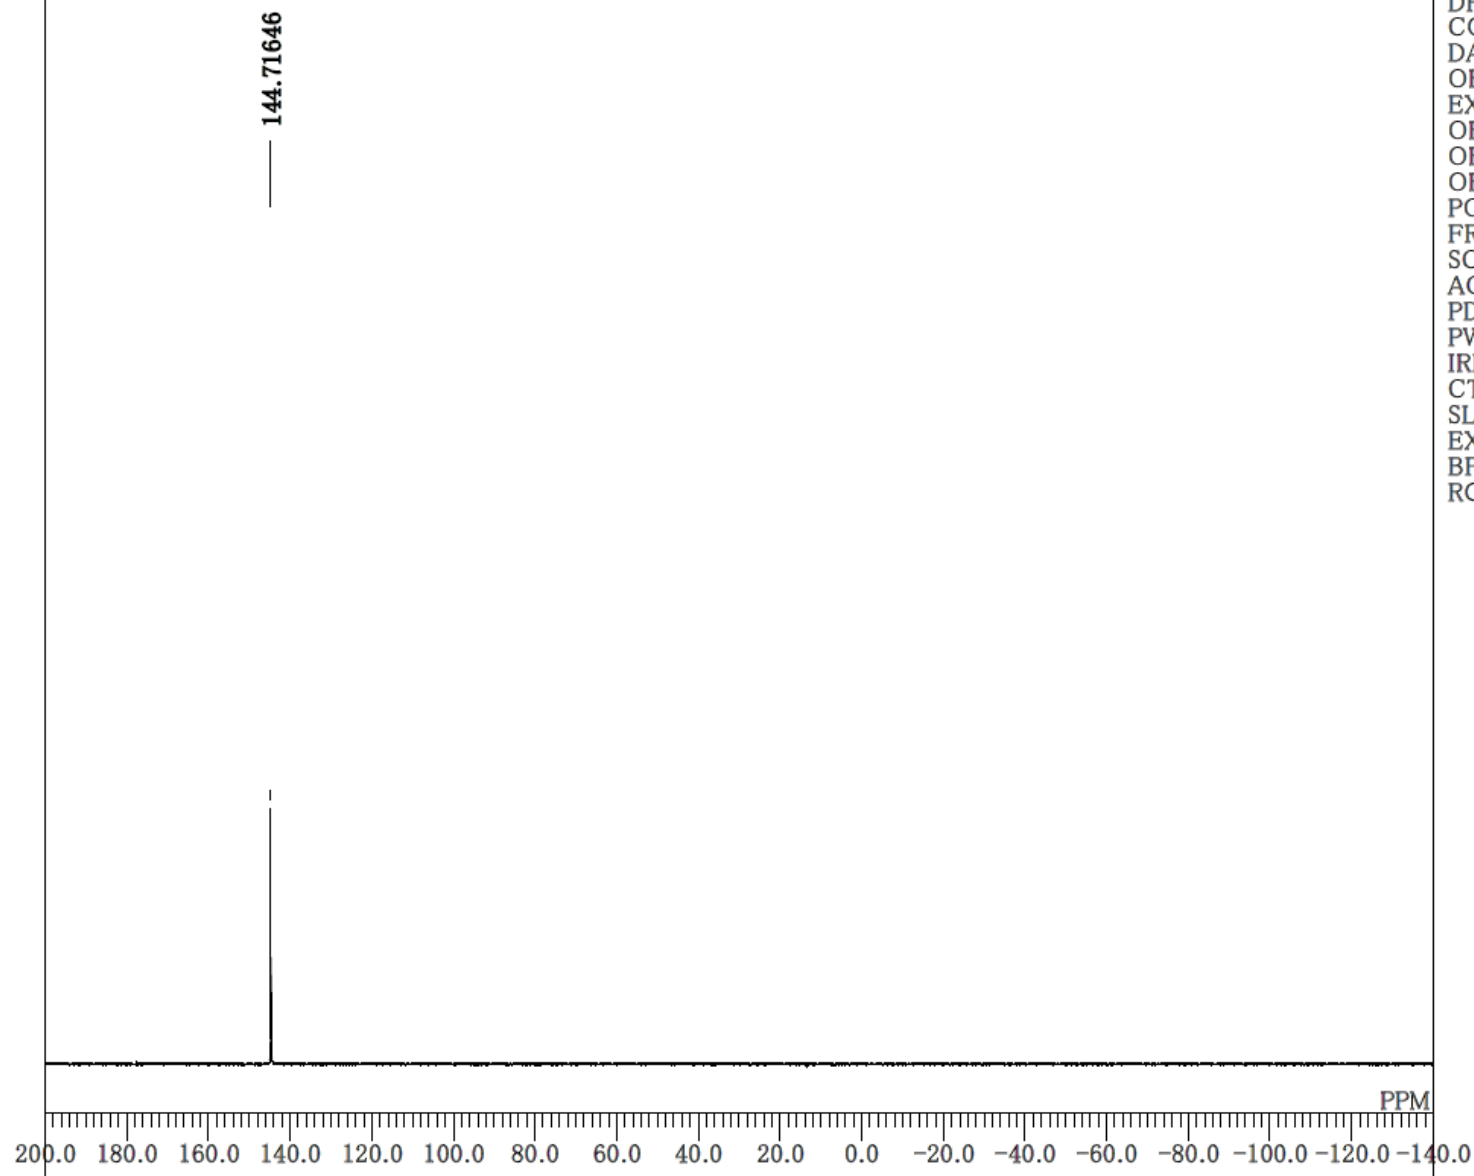

C:\Users\alice\Desktop\Chen ligand\L6\_proton.als

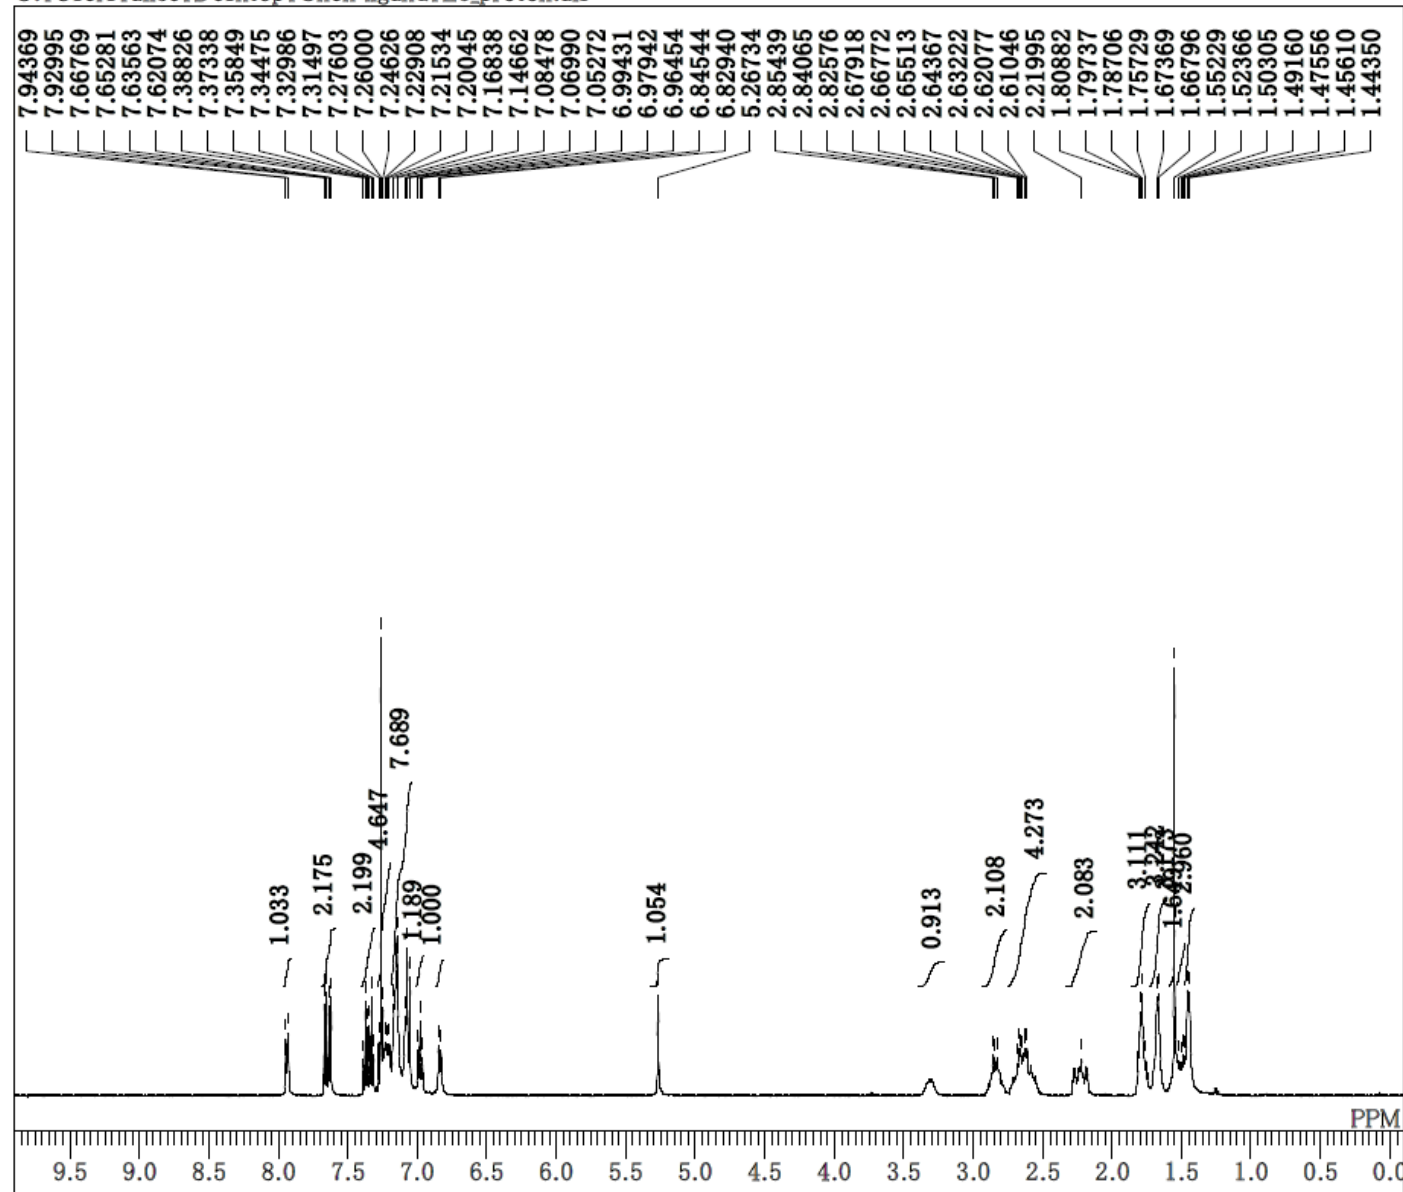

DFILE  
COMNT  
DATIM  
OBNUC  
EXMOD  
OBFRQ  
OBSET  
OBFIN  
POINT  
FREQU  
SCANS  
ACQTM  
PD  
PW1  
IRNUC  
CTEMP  
SLVNT  
EXREF  
BF  
RGAIN

L6\_proton.als  
2020-04-16 15:46:41  
1H  
proton.jxp  
500.16 MHz  
2.41 KHz  
6.01 Hz  
13107  
7507.51 Hz  
8  
1.7459 sec  
6.0000 sec  
5.55 usec  
1H  
21.2 c  
CDCL3  
7.26 ppm  
0.12 Hz  
42

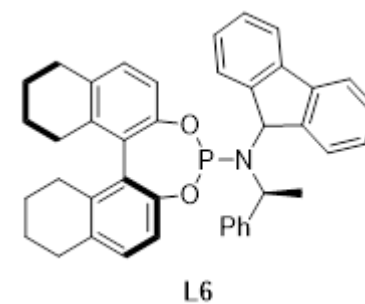

C:\Users\valice\Desktop\Chen ligand\L6\_carbon.als

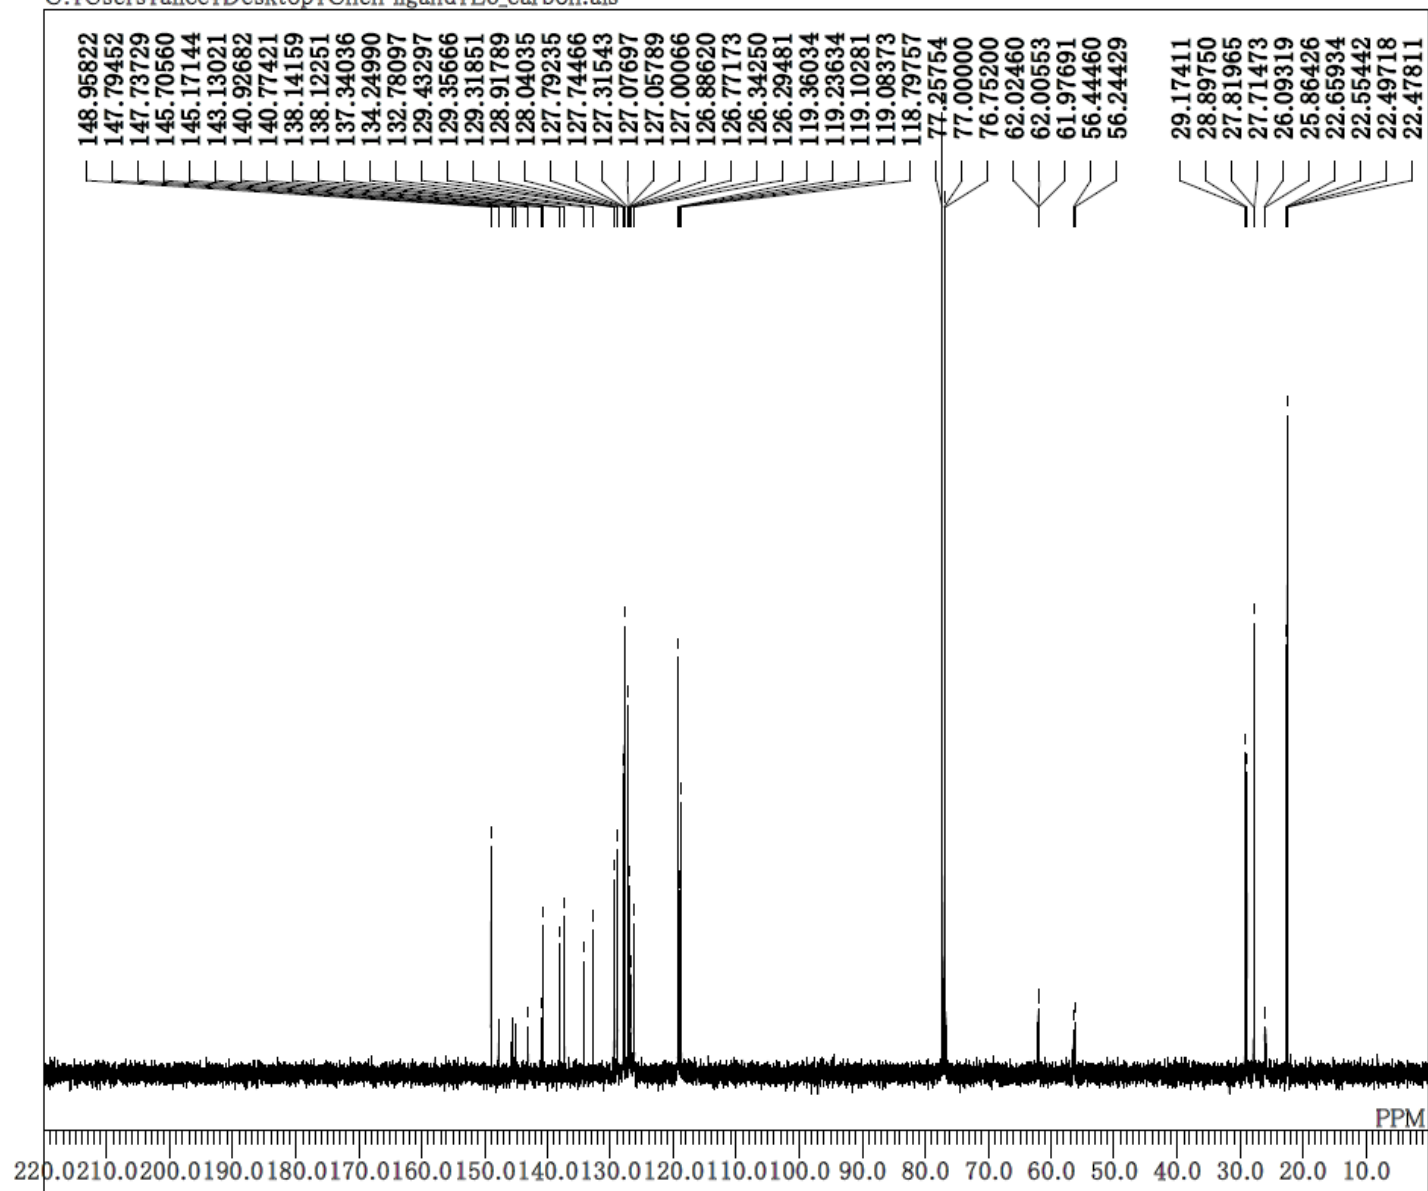

DFILE L6\_carbon.als  
COMNT  
DATIM 2020-04-16 19:52:51  
OBNUC 13C  
EXMOD carbon.jpg  
OBFRQ 125.77 MHz  
OBSET 7.87 KHz  
OBFIN 4.21 Hz  
POINT 26214  
FREQU 31446.54 Hz  
SCANS 212  
ACQTM 0.8336 sec  
PD 2.0000 sec  
PW1 3.40 usec  
IRNUC 1H  
CTEMP 21.5 c  
SLVNT CDCL3  
EXREF 77.00 ppm  
BF 0.12 Hz  
RGAIN 60



C:\Users\alice\Desktop\Chen ligand\L6\_P.als

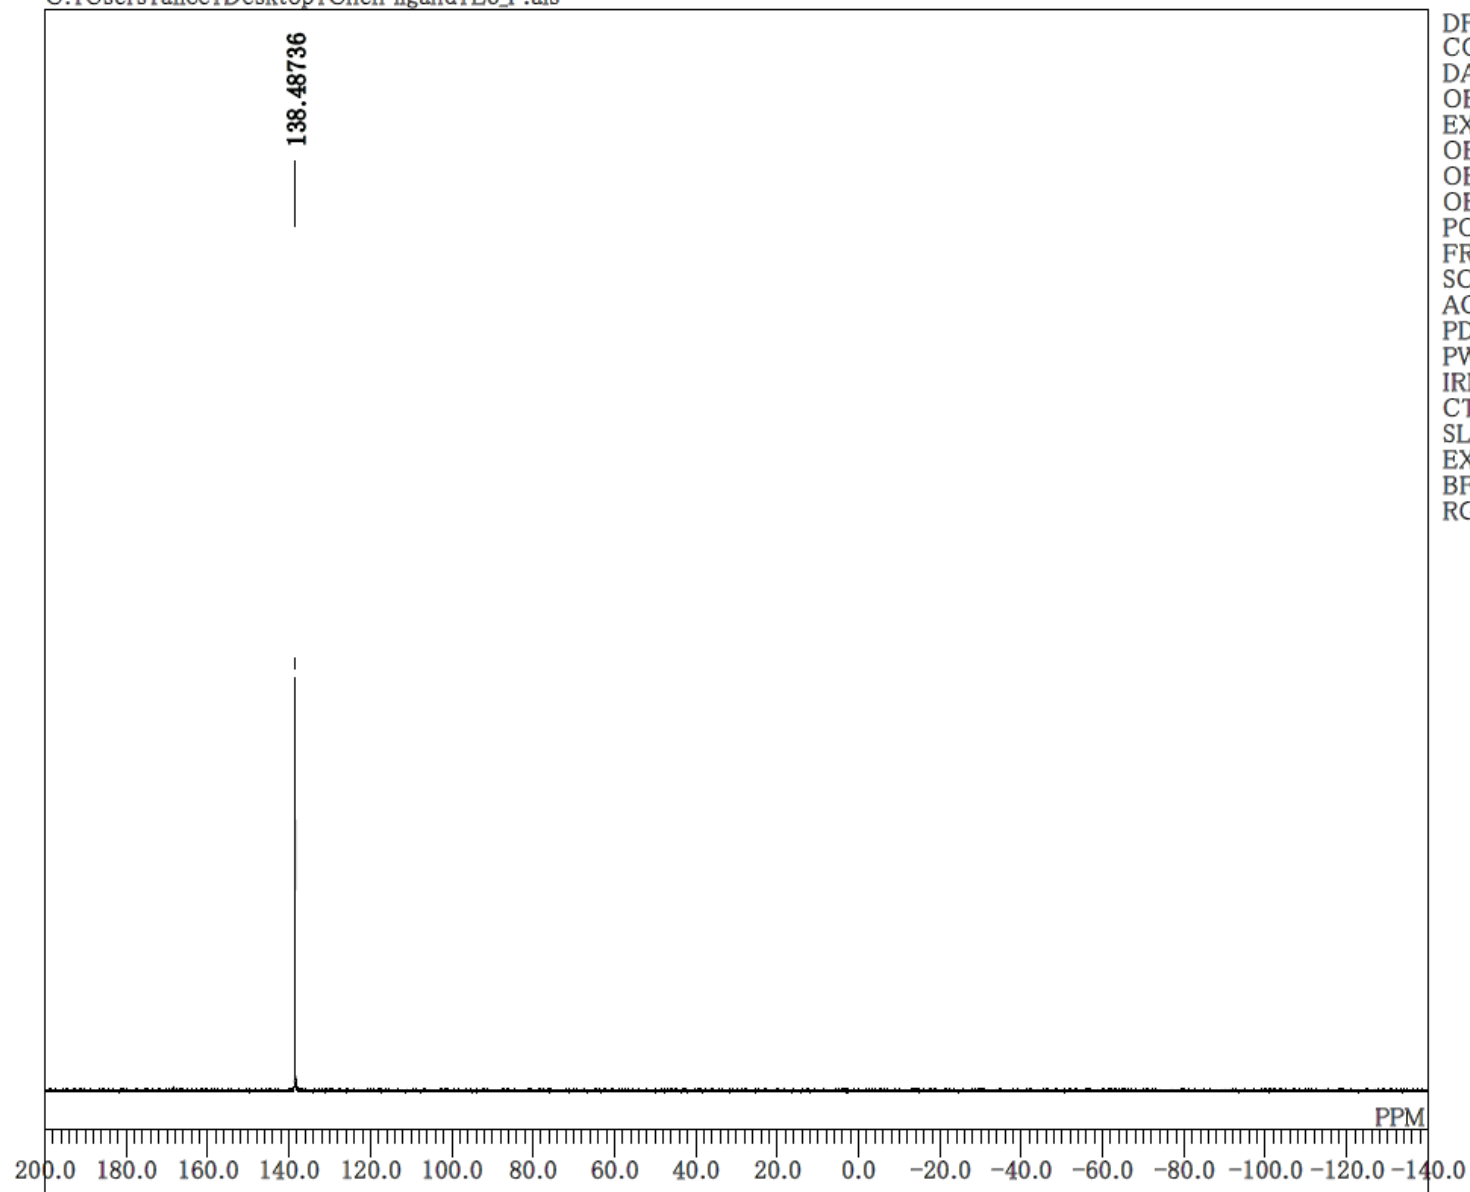

DFILE L6\_P.als  
COMNT  
DATIM 09-05-2020 03:34:14  
OBNUC 31P  
EXMOD carbon.jxp  
OBFRQ 158.59 MHz  
OBSET 7.99 KHz  
OBFIN 9.23 Hz  
POINT 26214  
FREQU 64102.56 Hz  
SCANS 100  
ACQTM 0.4089 sec  
PD 2.0000 sec  
PW1 4.80 usec  
IRNUC 1H  
CTEMP 20.7 c  
SLVNT CDCL3  
EXREF -6.00 ppm  
BF 0.12 Hz  
RGAIN 56

C:\Users\alice\Desktop\Chen ligand\L7\_proton.als

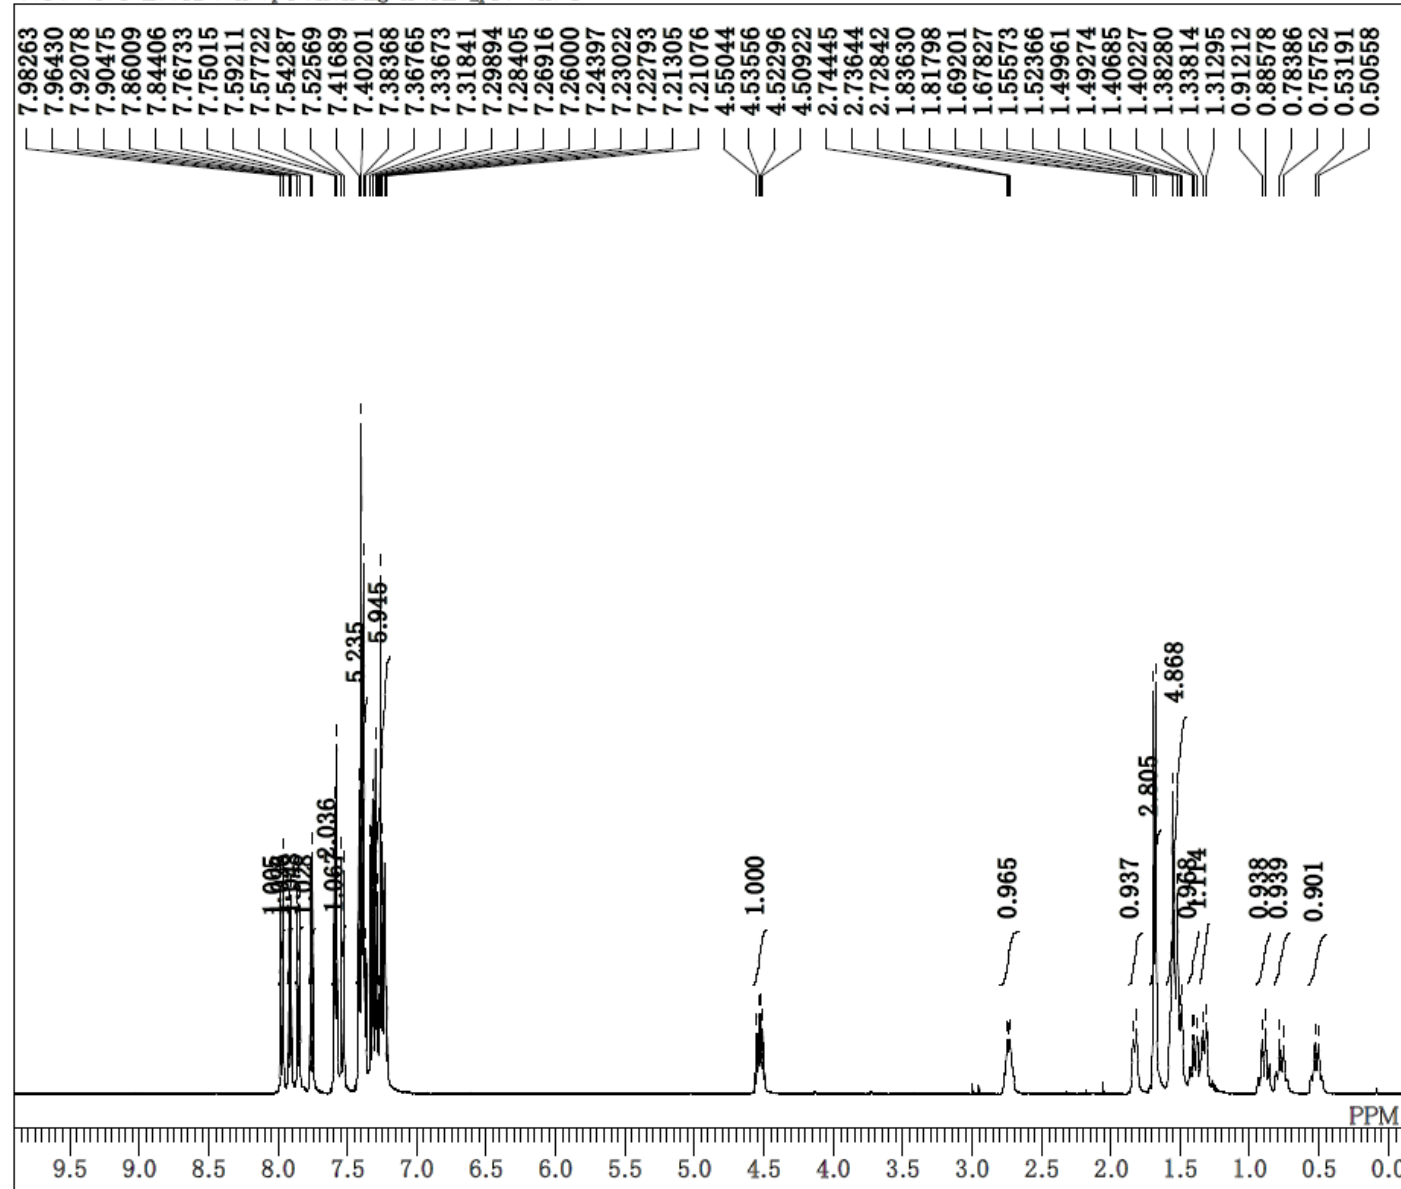

DFILE L7\_proton.als  
 COMNT  
 DATIM 2020-04-17 14:34:21  
 OBNUC <sup>1</sup>H  
 EXMOD proton.jxp  
 OBFRQ 500.16 MHz  
 OBSET 2.41 KHz  
 OBFIN 6.01 Hz  
 POINT 13107  
 FREQU 7507.51 Hz  
 SCANS 8  
 ACQTM 1.7459 sec  
 PD 6.0000 sec  
 PW1 5.55 usec  
 IRNUC <sup>1</sup>H  
 CTEMP 21.3 c  
 SLVNT CDCL<sub>3</sub>  
 EXREF 7.26 ppm  
 BF 0.12 Hz  
 RGAIN 40

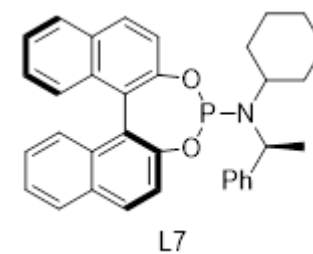

C:\Users\valice\Desktop\Chen ligand\L7\_carbon.als

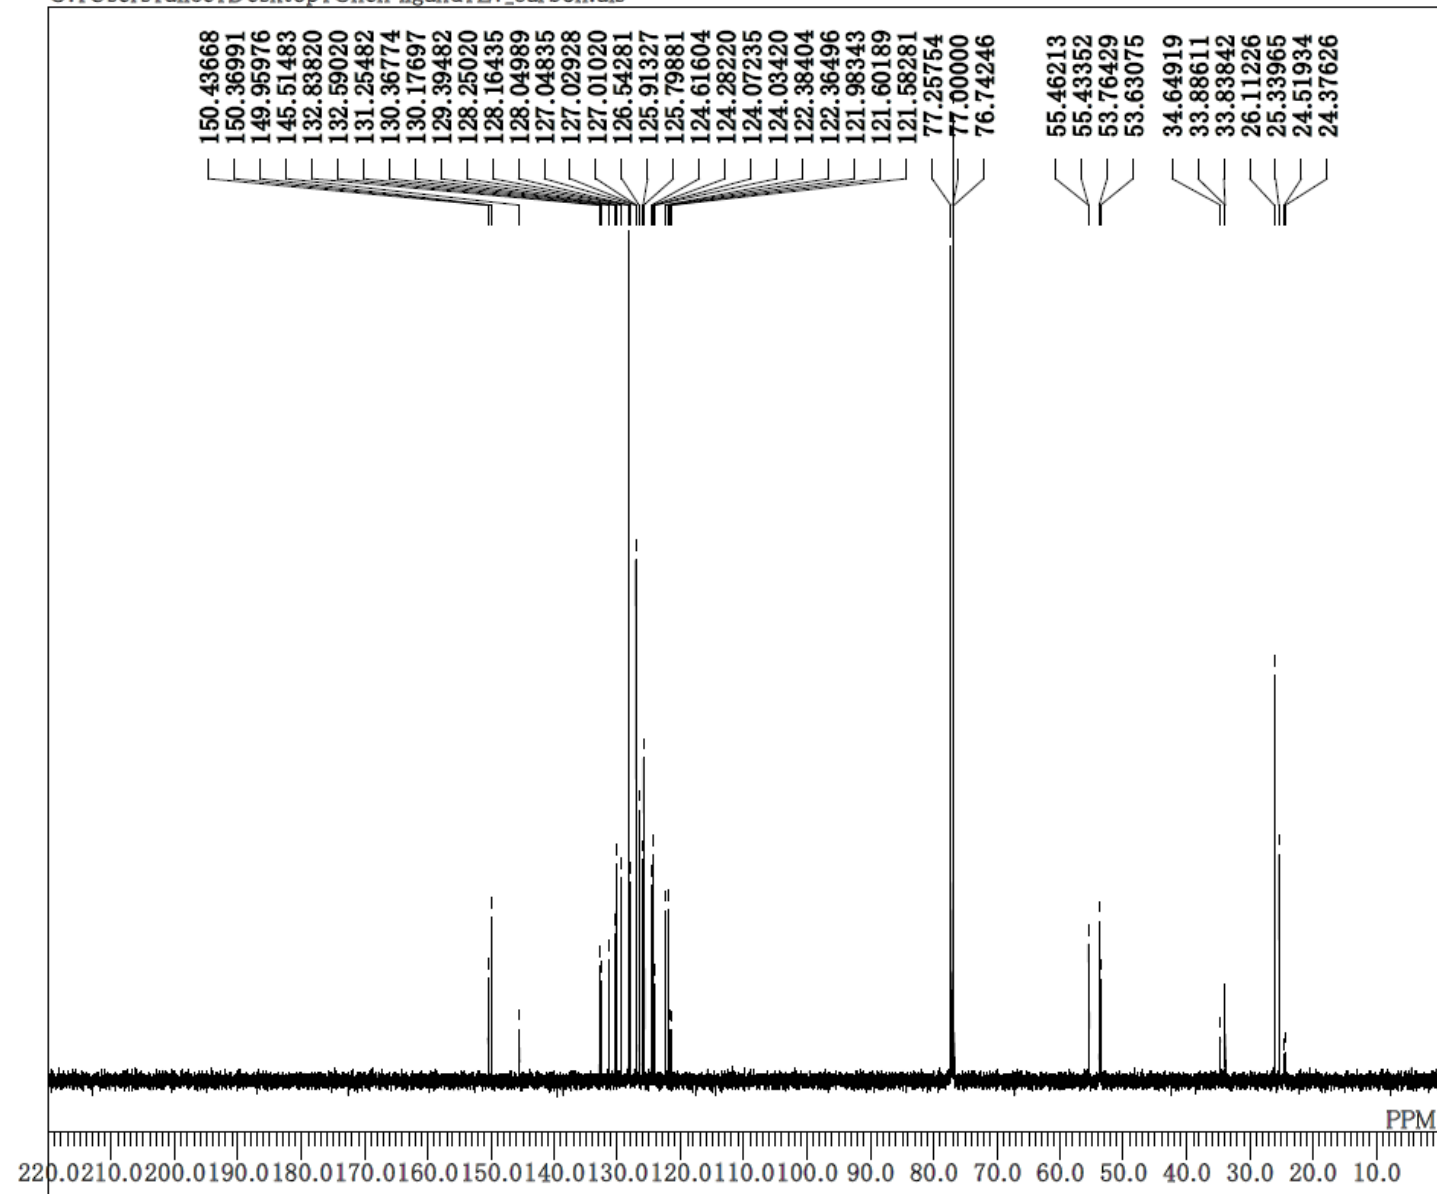

DFILE L7\_carbon.als  
 COMNT  
 DATIM 2020-04-17 14:47:41  
 OBNUC <sup>13</sup>C  
 EXMOD carbon.jpg  
 OBFRQ 125.77 MHz  
 OBSET 7.87 KHz  
 OBFIN 4.21 Hz  
 POINT 26214  
 FREQU 31446.54 Hz  
 SCANS 361  
 ACQTM 0.8336 sec  
 PD 2.0000 sec  
 PW1 3.40 usec  
 IRNUC <sup>1</sup>H  
 CTEMP 21.7 c  
 SLVNT CDCL<sub>3</sub>  
 EXREF 77.00 ppm  
 BF 0.12 Hz  
 RGAIN 60

C:\Users\Valice\Desktop\Chen ligand\L7\_P.als

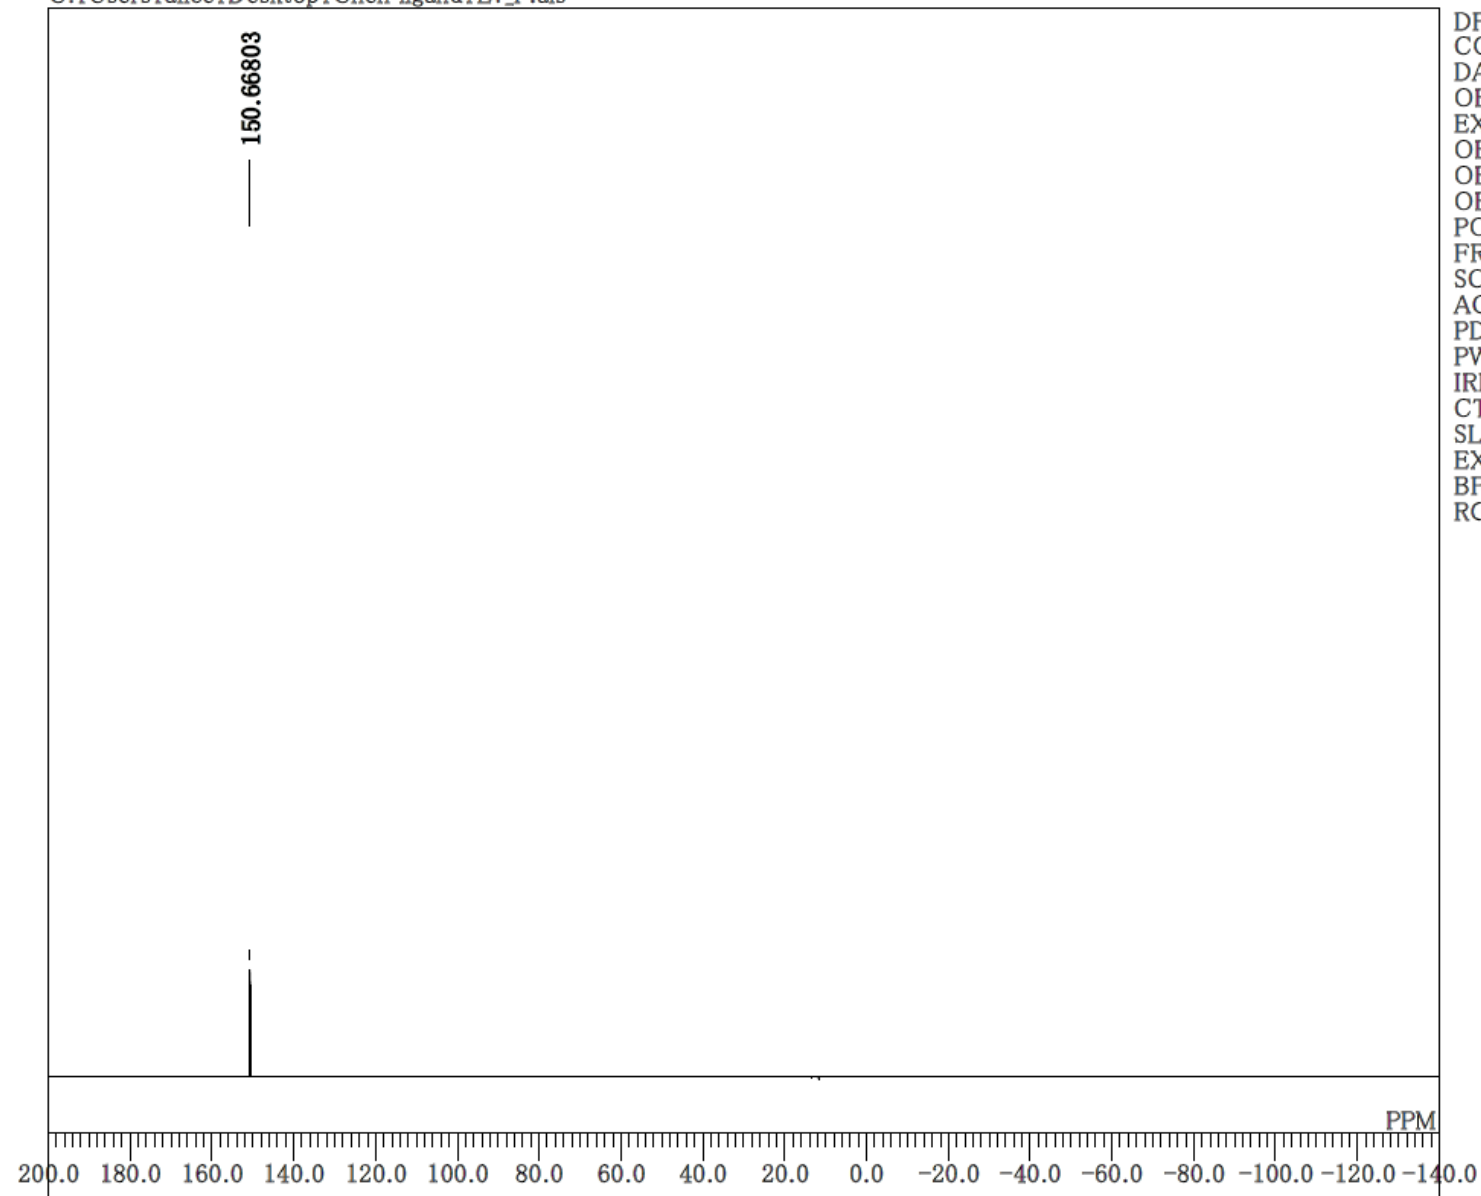

DFILE L7\_P.als  
COMNT  
DATIM 09-05-2020 02:46:31  
OBNUC 31P  
EXMOD carbon.jxp  
OBFRQ 158.59 MHz  
OBSET 7.99 KHz  
OBFIN 9.23 Hz  
POINT 26214  
FREQU 64102.56 Hz  
SCANS 100  
ACQTM 0.4089 sec  
PD 2.0000 sec  
PW1 4.80 usec  
IRNUC 1H  
CTEMP 20.8 c  
SLVNT CDCL3  
EXREF -6.00 ppm  
BF 0.12 Hz  
RGAIN 54

C:\Users\valice\Desktop\Chen ligand\L8\_proton.als

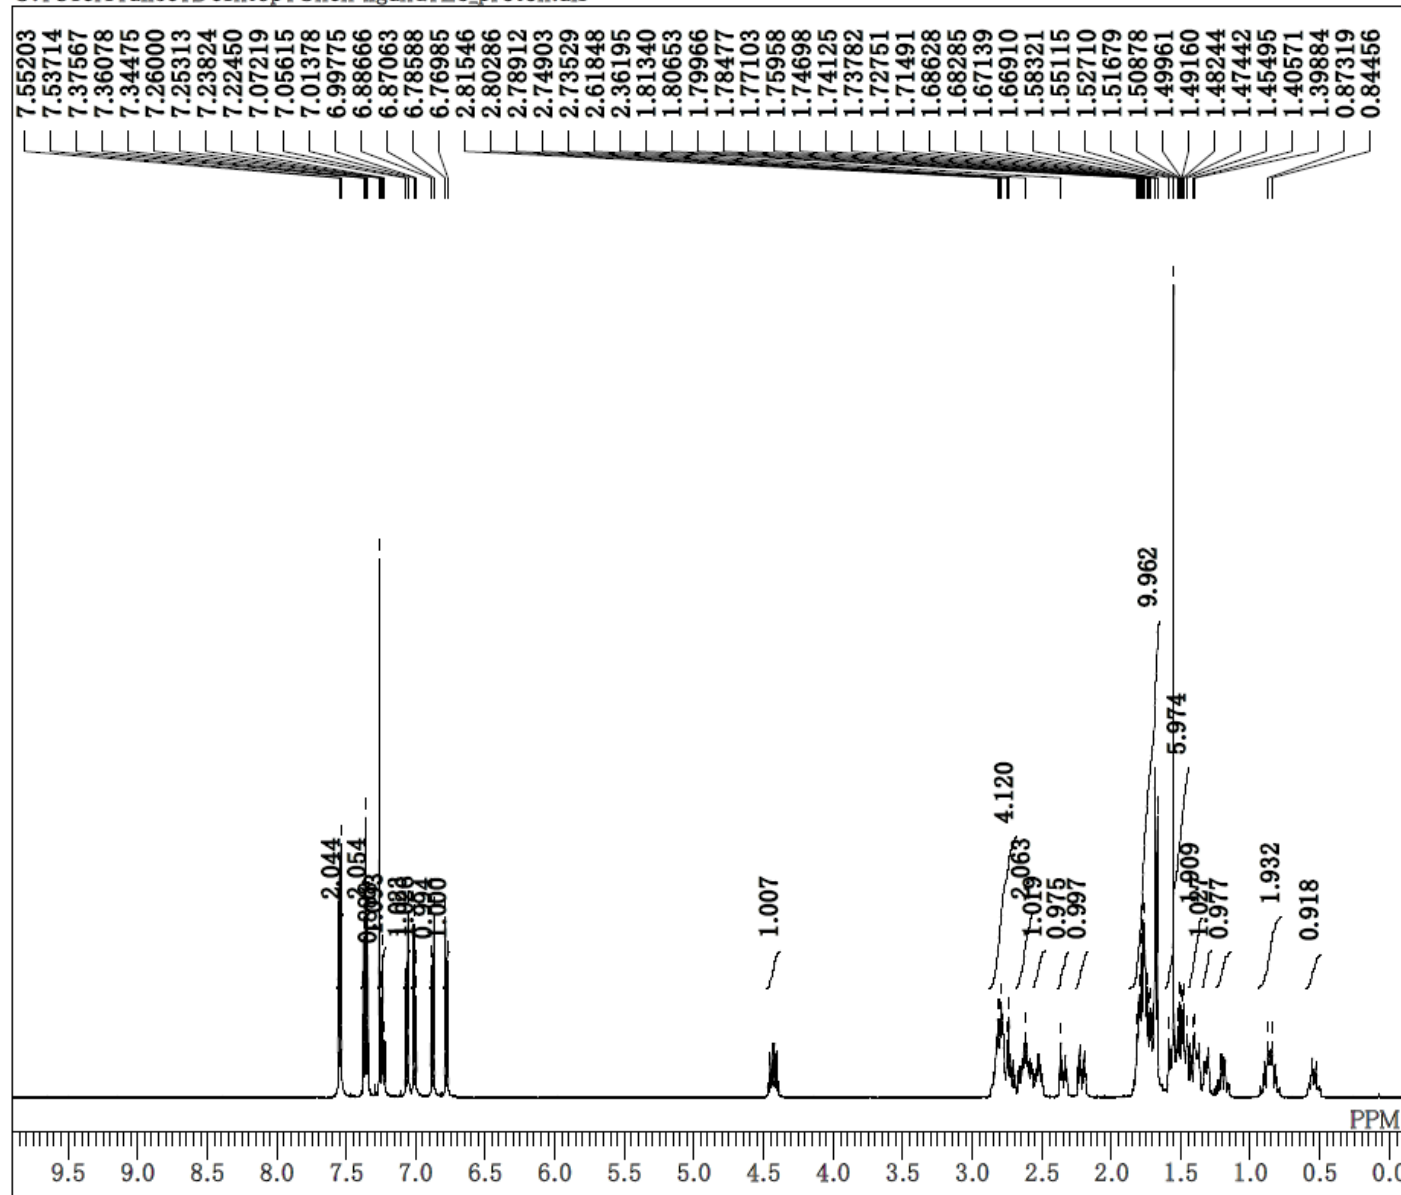

DFILE L8\_proton.als  
 COMNT  
 DATIM 2020-04-17 14:39:33  
 OBNUC 1H  
 EXMOD proton.jxp  
 OBFRQ 500.16 MHz  
 OBSET 2.41 KHz  
 OBFIN 6.01 Hz  
 POINT 13107  
 FREQU 7507.51 Hz  
 SCANS 8  
 ACQTM 1.7459 sec  
 PD 6.0000 sec  
 PW1 5.55 usec  
 IRNUC 1H  
 CTEMP 21.4 c  
 SLVNT CDCL3  
 EXREF 7.26 ppm  
 BF 0.12 Hz  
 RGAIN 42

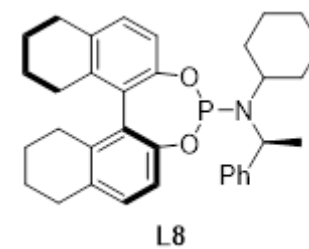

C:\Users\alice\Desktop\Chen ligand\L8\_carbon.als

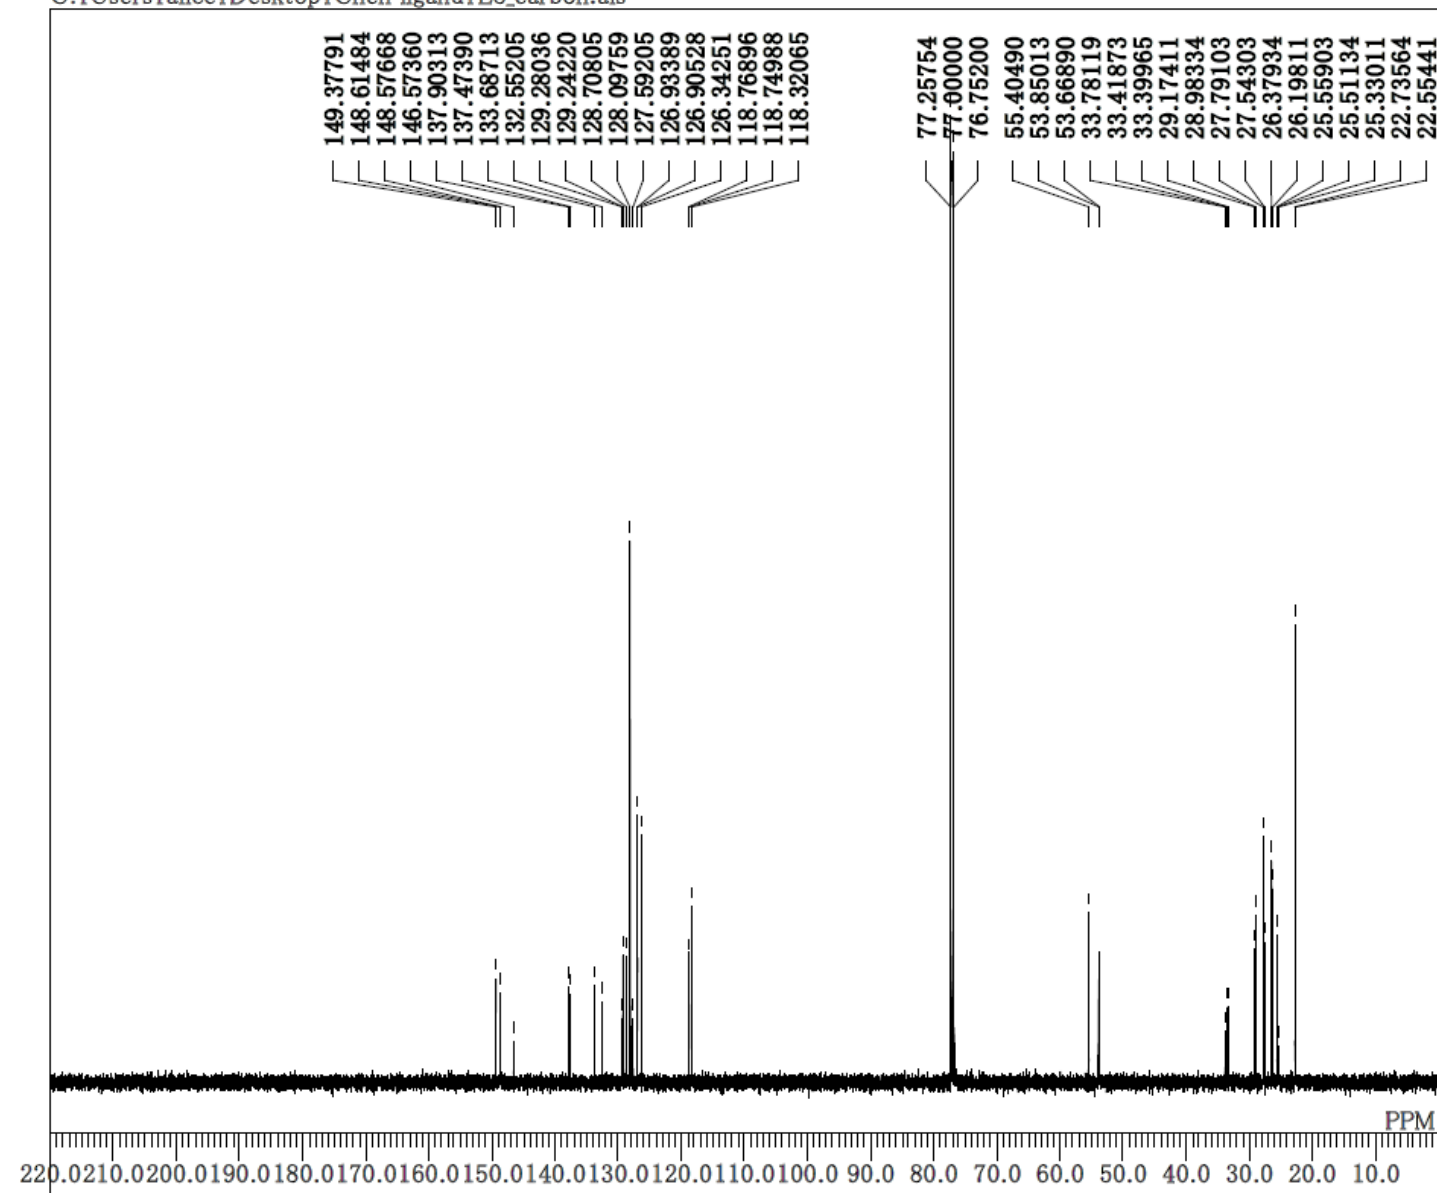

DFILE L8\_carbon.als  
 COMNT  
 DATIM 2020-04-17 15:08:14  
 OBNUC <sup>13</sup>C  
 EXMOD carbon.jpg  
 OBFRQ 125.77 MHz  
 OBSET 7.87 KHz  
 OBFIN 4.21 Hz  
 POINT 26214  
 FREQU 31446.54 Hz  
 SCANS 421  
 ACQTM 0.8336 sec  
 PD 2.0000 sec  
 PW1 3.40 usec  
 IRNUC <sup>1</sup>H  
 CTEMP 21.7 c  
 SLVNT CDCL<sub>3</sub>  
 EXREF 77.00 ppm  
 BF 0.12 Hz  
 RGAIN 60

C:\Users\alice\Desktop\Chen ligand\L8\_P.als

DFILE L8\_P.als  
COMNT  
DATIM 09-05-2020 03:26:06  
OBNUC 31P  
EXMOD carbon.jxp  
OBFRQ 158.59 MHz  
OBSET 7.99 KHz  
OBFIN 9.23 Hz  
POINT 26214  
FREQU 64102.56 Hz  
SCANS 100  
ACQTM 0.4089 sec  
PD 2.0000 sec  
PW1 4.80 usec  
IRNUC 1H  
CTEMP 20.7 c  
SLVNT CDCL3  
EXREF -6.00 ppm  
BF 0.12 Hz  
RGAIN 54

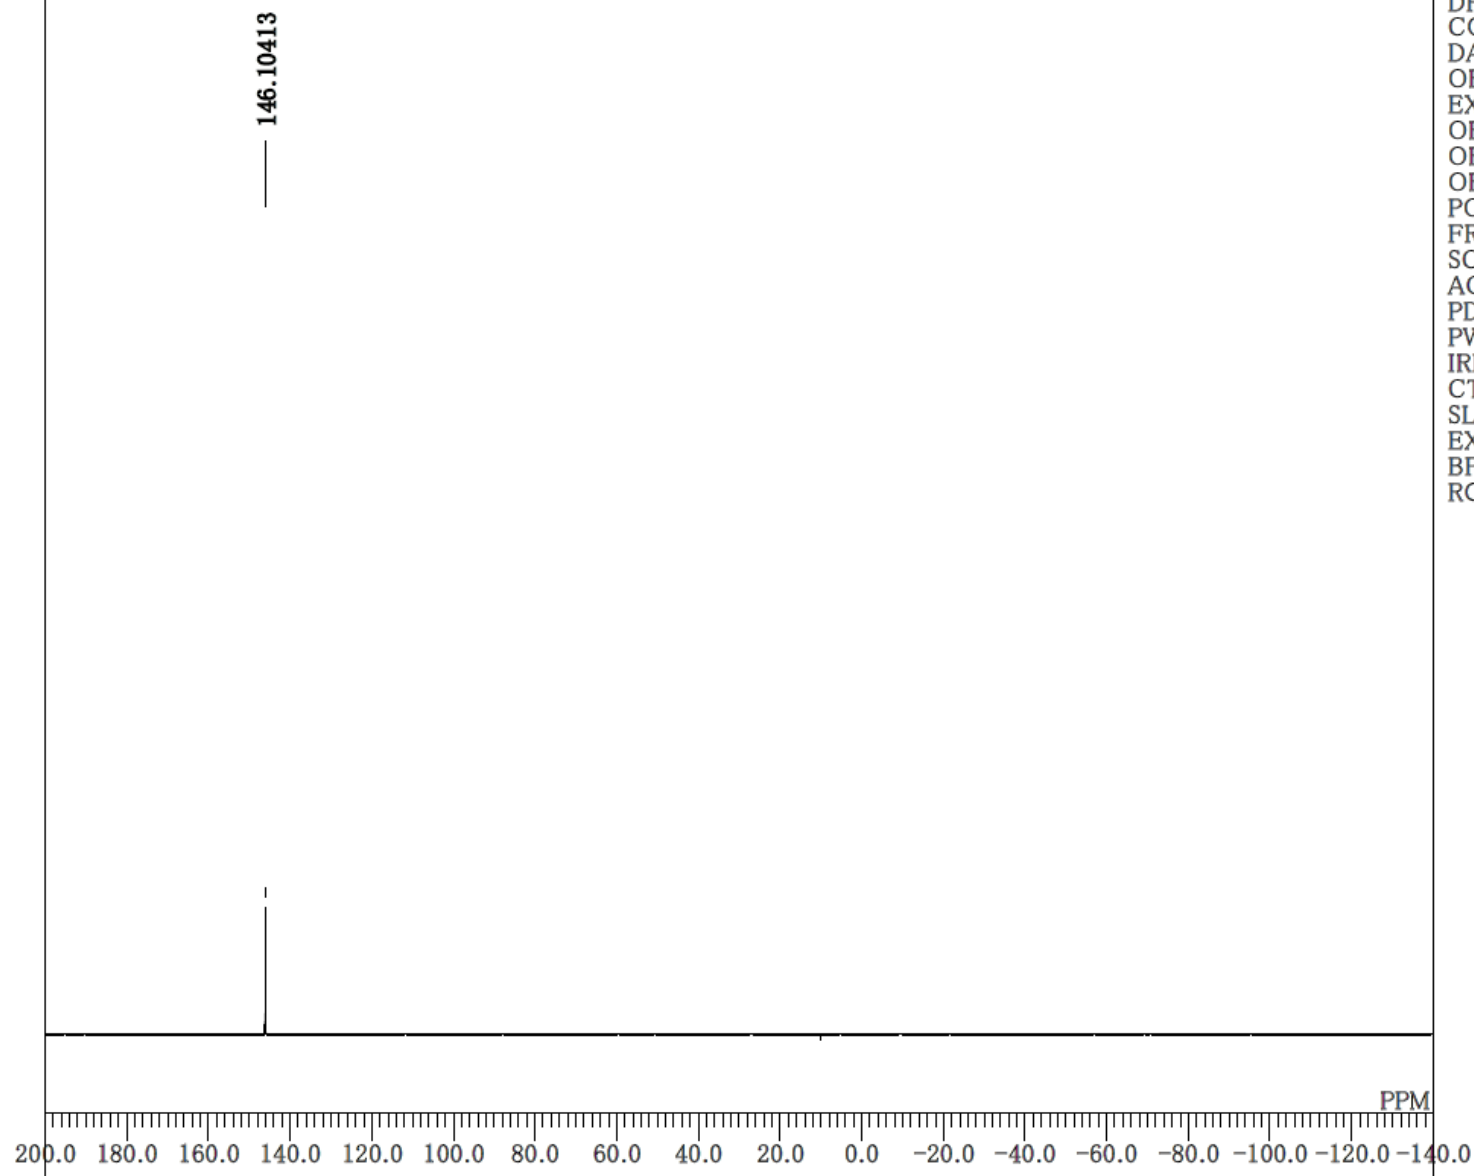

C:\Users\valice\Desktop\Chen ligand\L9\_proton.als

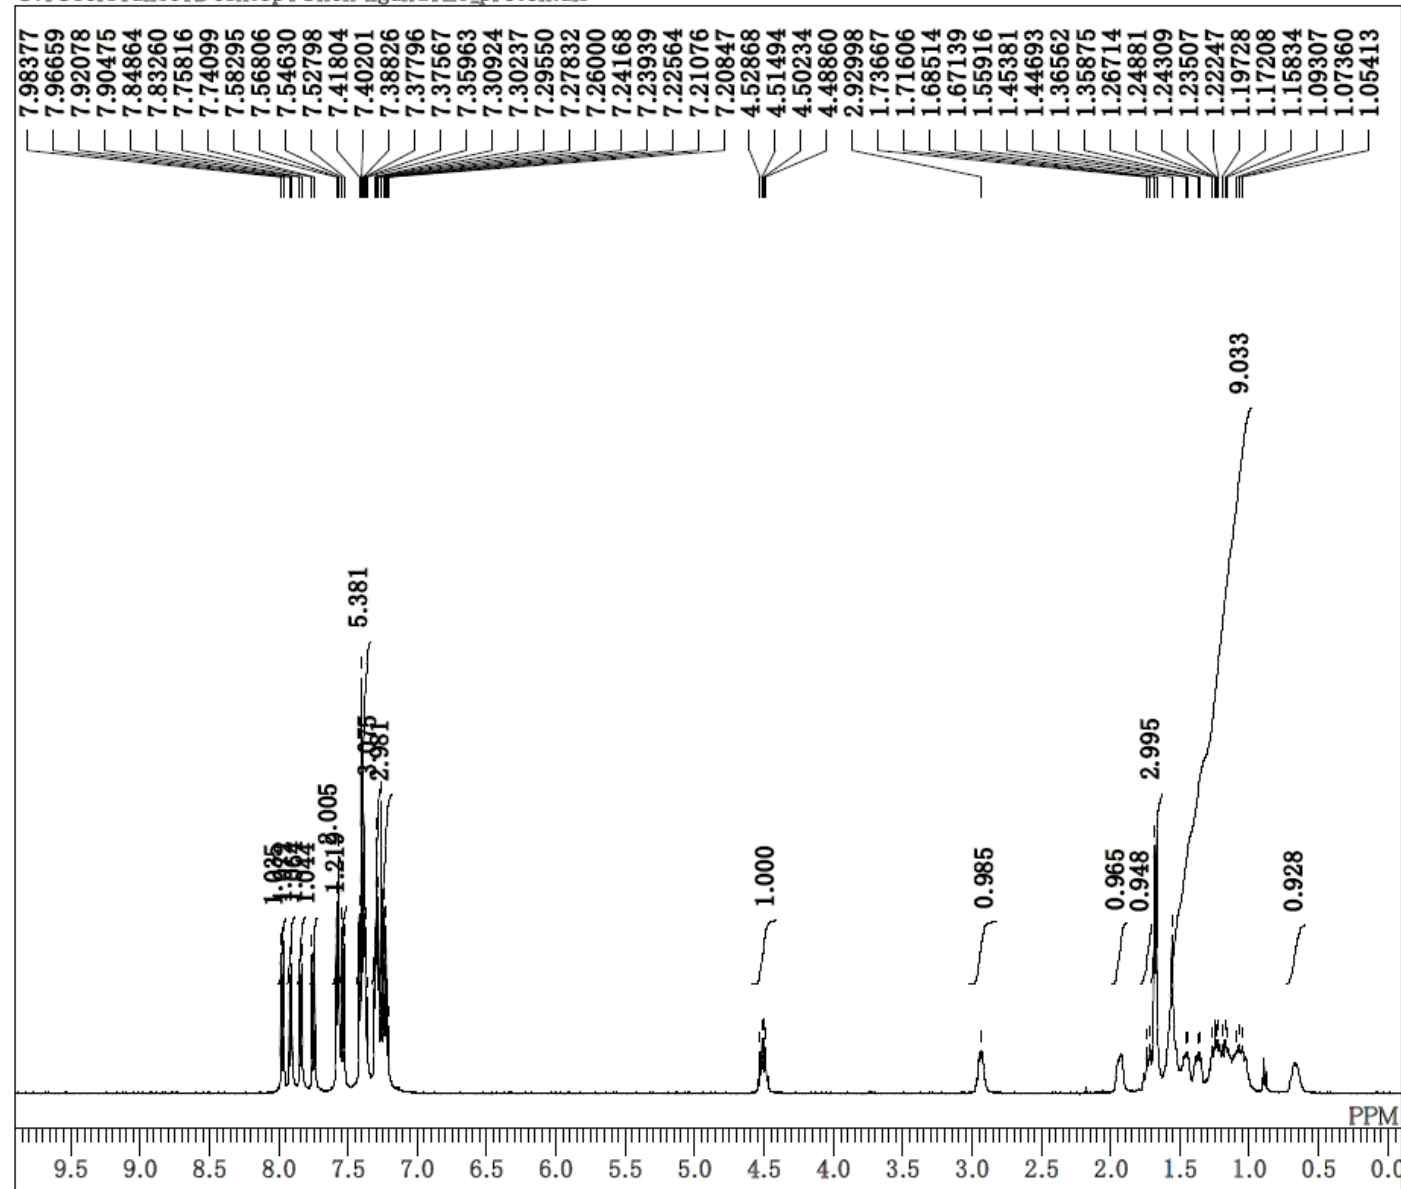

DFILE L9\_proton.als  
 COMNT  
 DATIM 2020-04-17 19:57:49  
 OBNUC <sup>1</sup>H  
 EXMOD proton.jxp  
 OBFRQ 500.16 MHz  
 OBSET 2.41 KHz  
 OBFIN 6.01 Hz  
 POINT 13107  
 FREQU 7507.51 Hz  
 SCANS 8  
 ACQTM 1.7459 sec  
 PD 6.0000 sec  
 PW1 5.55 usec  
 IRNUC <sup>1</sup>H  
 CTEMP 21.0 c  
 SLVNT CDCL<sub>3</sub>  
 EXREF 7.26 ppm  
 BF 0.12 Hz  
 RGAIN 40

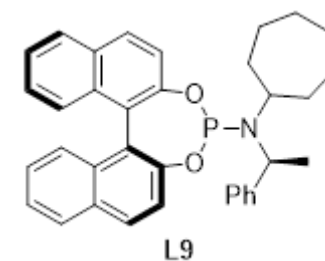



C:\Users\Valice\Desktop\Chen ligand\L9\_carbon.als

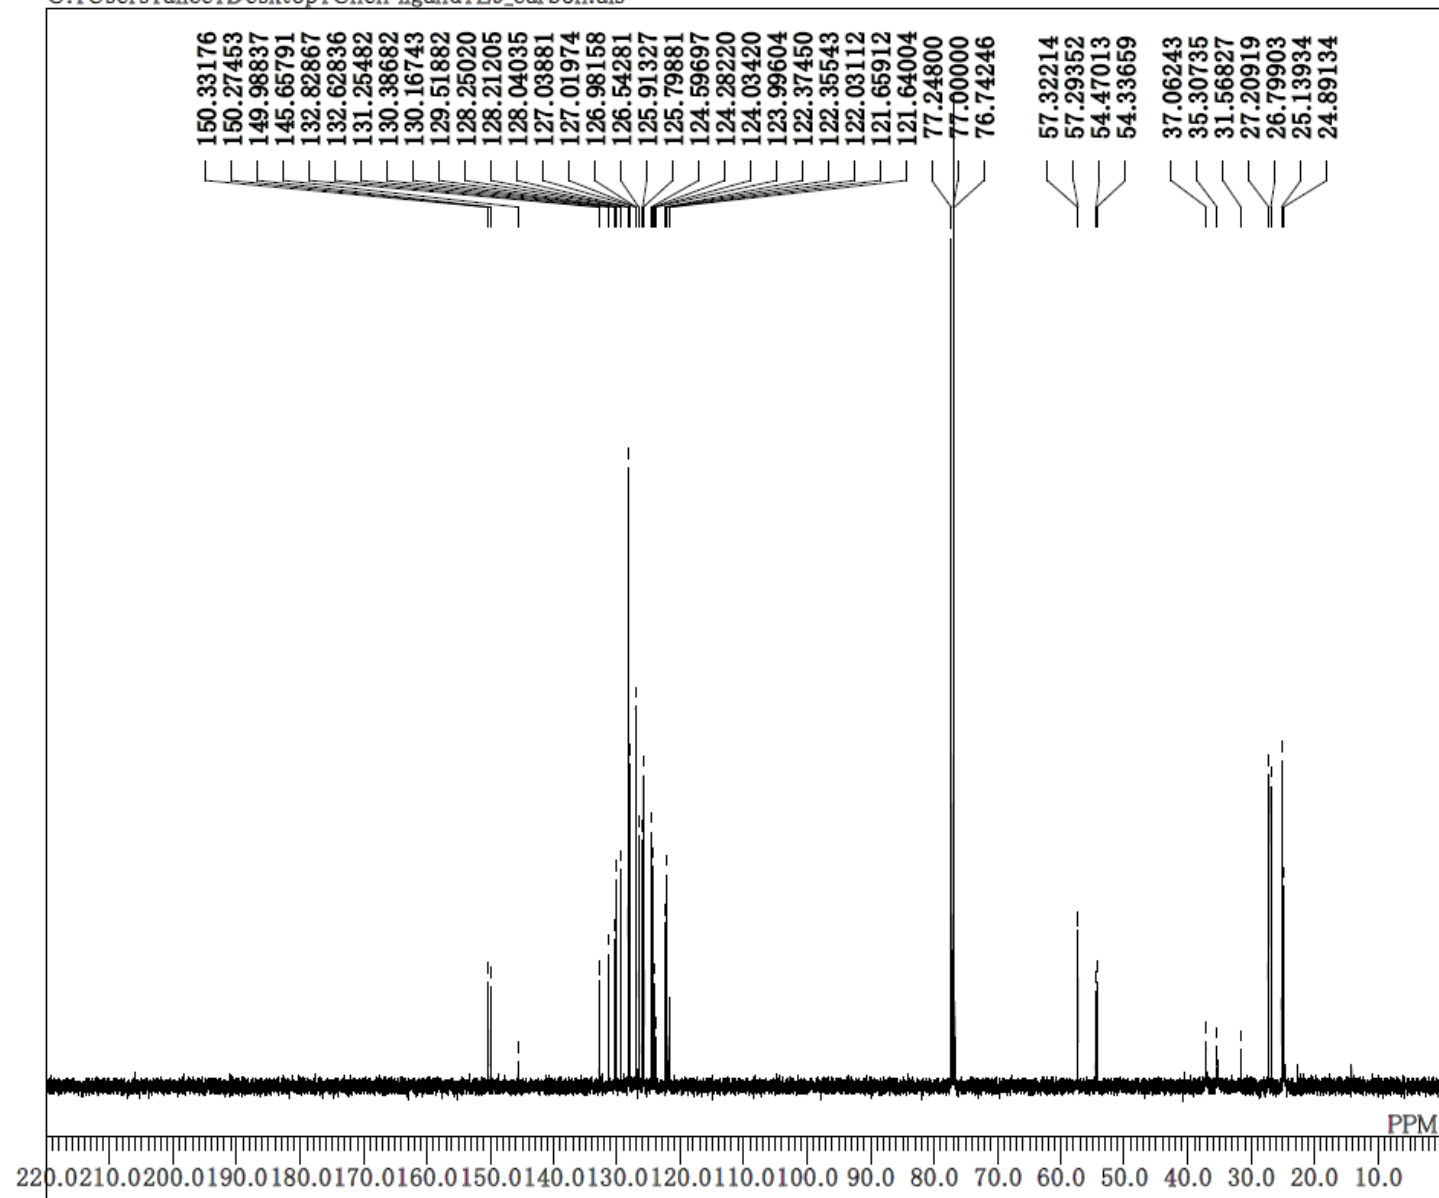

DFILE L9\_carbon.als  
 COMNT  
 DATIM 2020-04-17 20:08:14  
 OBNUC <sup>13</sup>C  
 EXMOD carbon.jxp  
 OBFRQ 125.77 MHz  
 OBSET 7.87 KHz  
 OBFIN 4.21 Hz  
 POINT 26214  
 FREQU 31446.54 Hz  
 SCANS 482  
 ACQTM 0.8336 sec  
 PD 2.0000 sec  
 PW1 3.40 usec  
 IRNUC <sup>1</sup>H  
 CTEMP 21.9 c  
 SLVNT CDCL<sub>3</sub>  
 EXREF 77.00 ppm  
 BF 0.12 Hz  
 RGAIN 60

C:\Users\alice\Desktop\Chen ligand\L9\_P.als

DFILE L9\_P.als  
COMNT  
DATIM 09-05-2020 02:24:20  
OBNUC 31P  
EXMOD carbon.jxp  
OBFRQ 158.59 MHz  
OBSET 7.99 KHz  
OBFIN 9.23 Hz  
POINT 26214  
FREQU 64102.56 Hz  
SCANS 100  
ACQTM 0.4089 sec  
PD 2.0000 sec  
PW1 4.80 usec  
IRNUC 1H  
CTEMP 20.8 c  
SLVNT CDCL3  
EXREF -6.00 ppm  
BF 0.12 Hz  
RGAIN 54

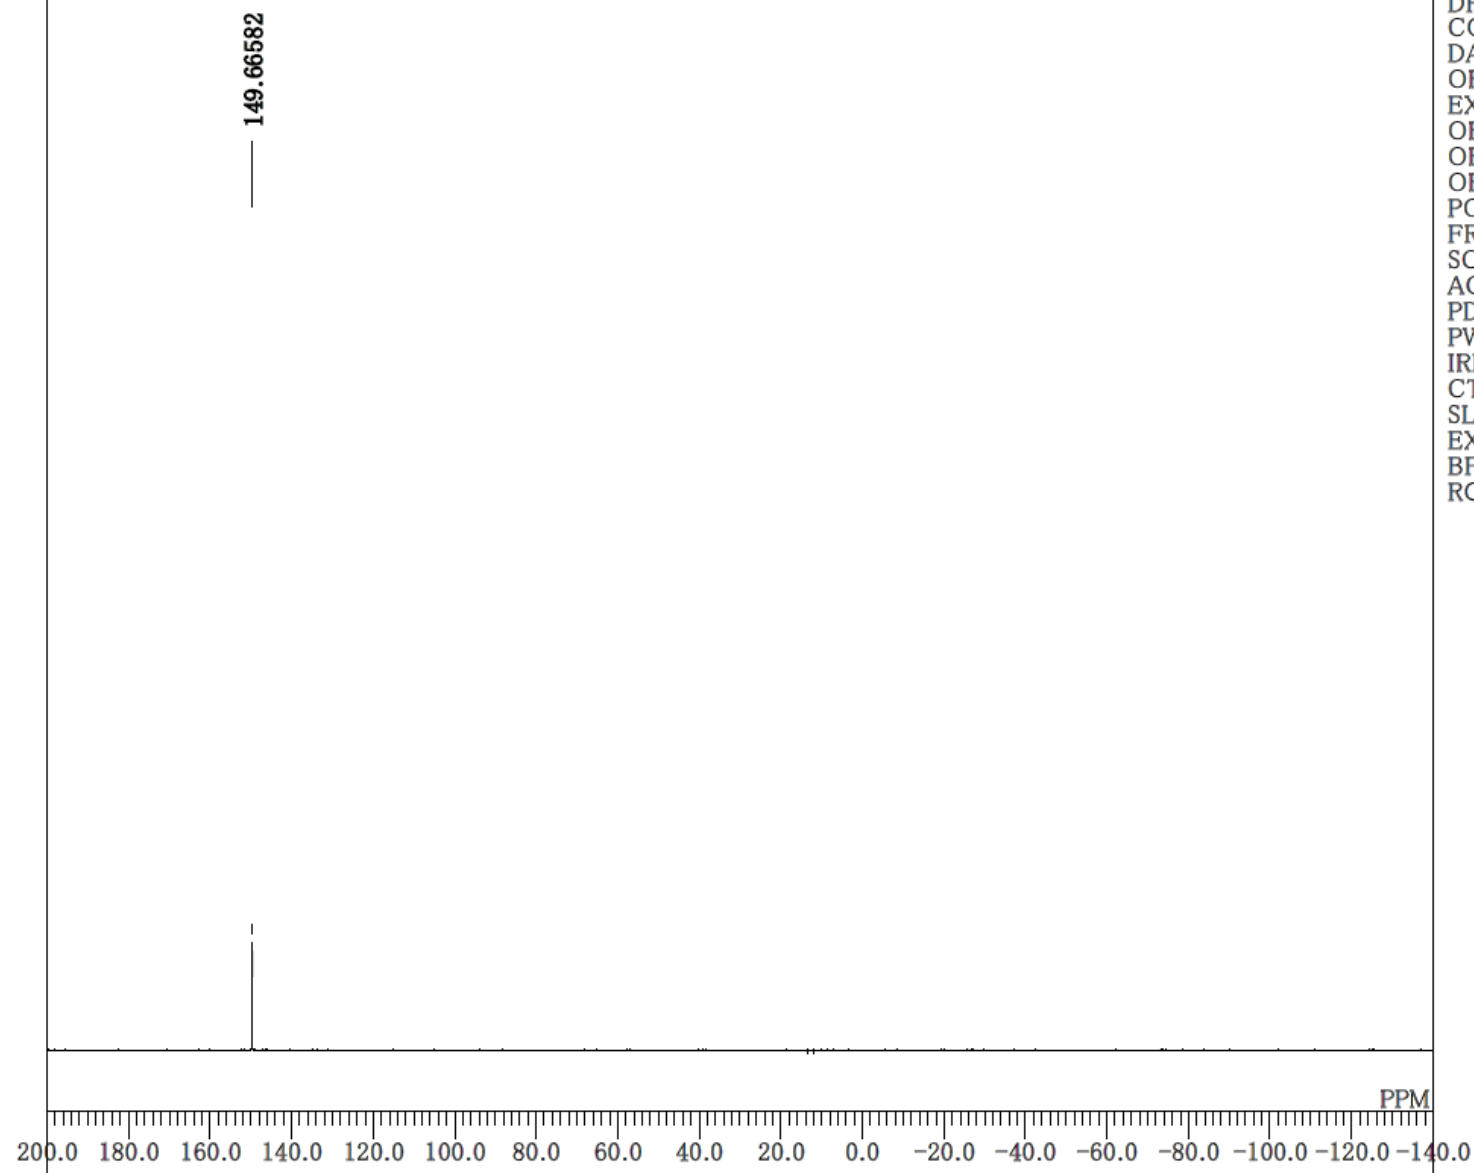

C:\Users\valice\Desktop\Chen ligand\L10\_proton.als

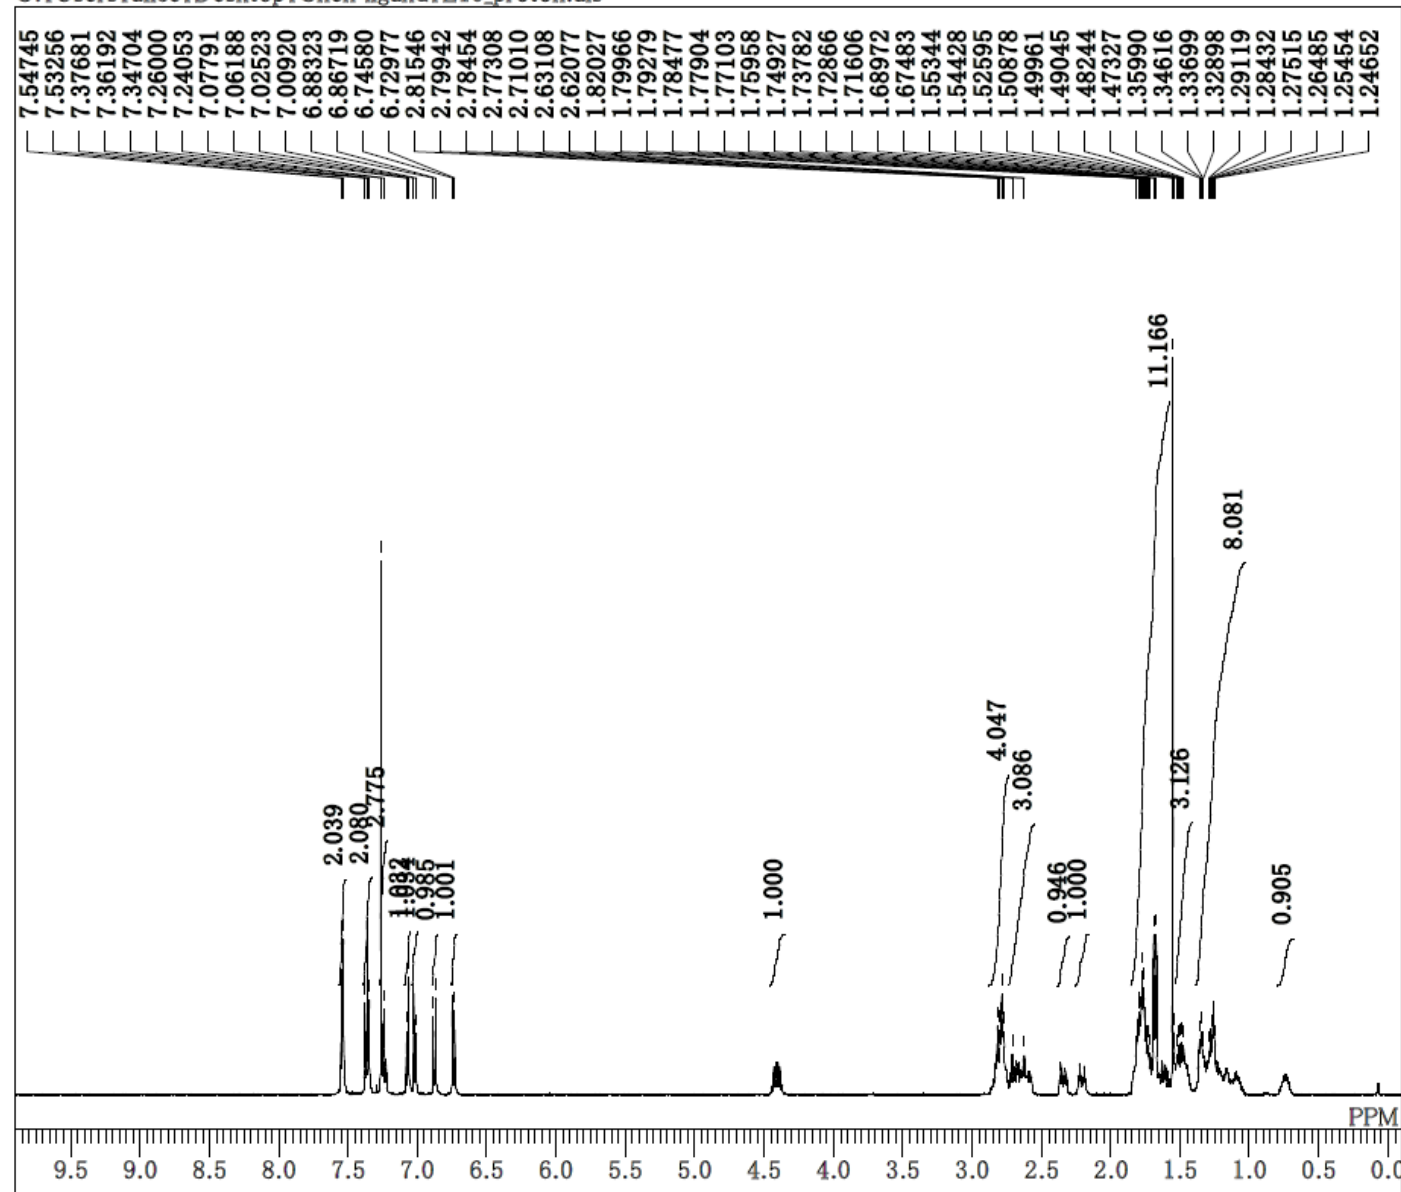

DFILE L10\_proton.als  
 COMNT  
 DATIM 2020-04-17 20:02:60  
 OBNUC 1H  
 EXMOD proton.jxp  
 OBFRQ 500.16 MHz  
 OBSET 2.41 KHz  
 OBFIN 6.01 Hz  
 POINT 13107  
 FREQU 7507.51 Hz  
 SCANS 8  
 ACQTM 1.7459 sec  
 PD 6.0000 sec  
 PW1 5.55 usec  
 IRNUC 1H  
 CTEMP 21.2 c  
 SLVNT CDCL3  
 EXREF 7.26 ppm  
 BF 0.12 Hz  
 RGAIN 42

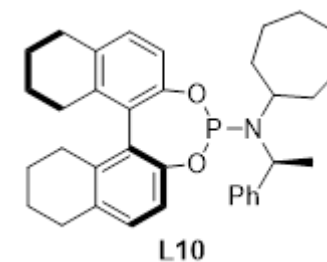

C:\Users\valice\Desktop\Chen ligand\L10\_carbon.als

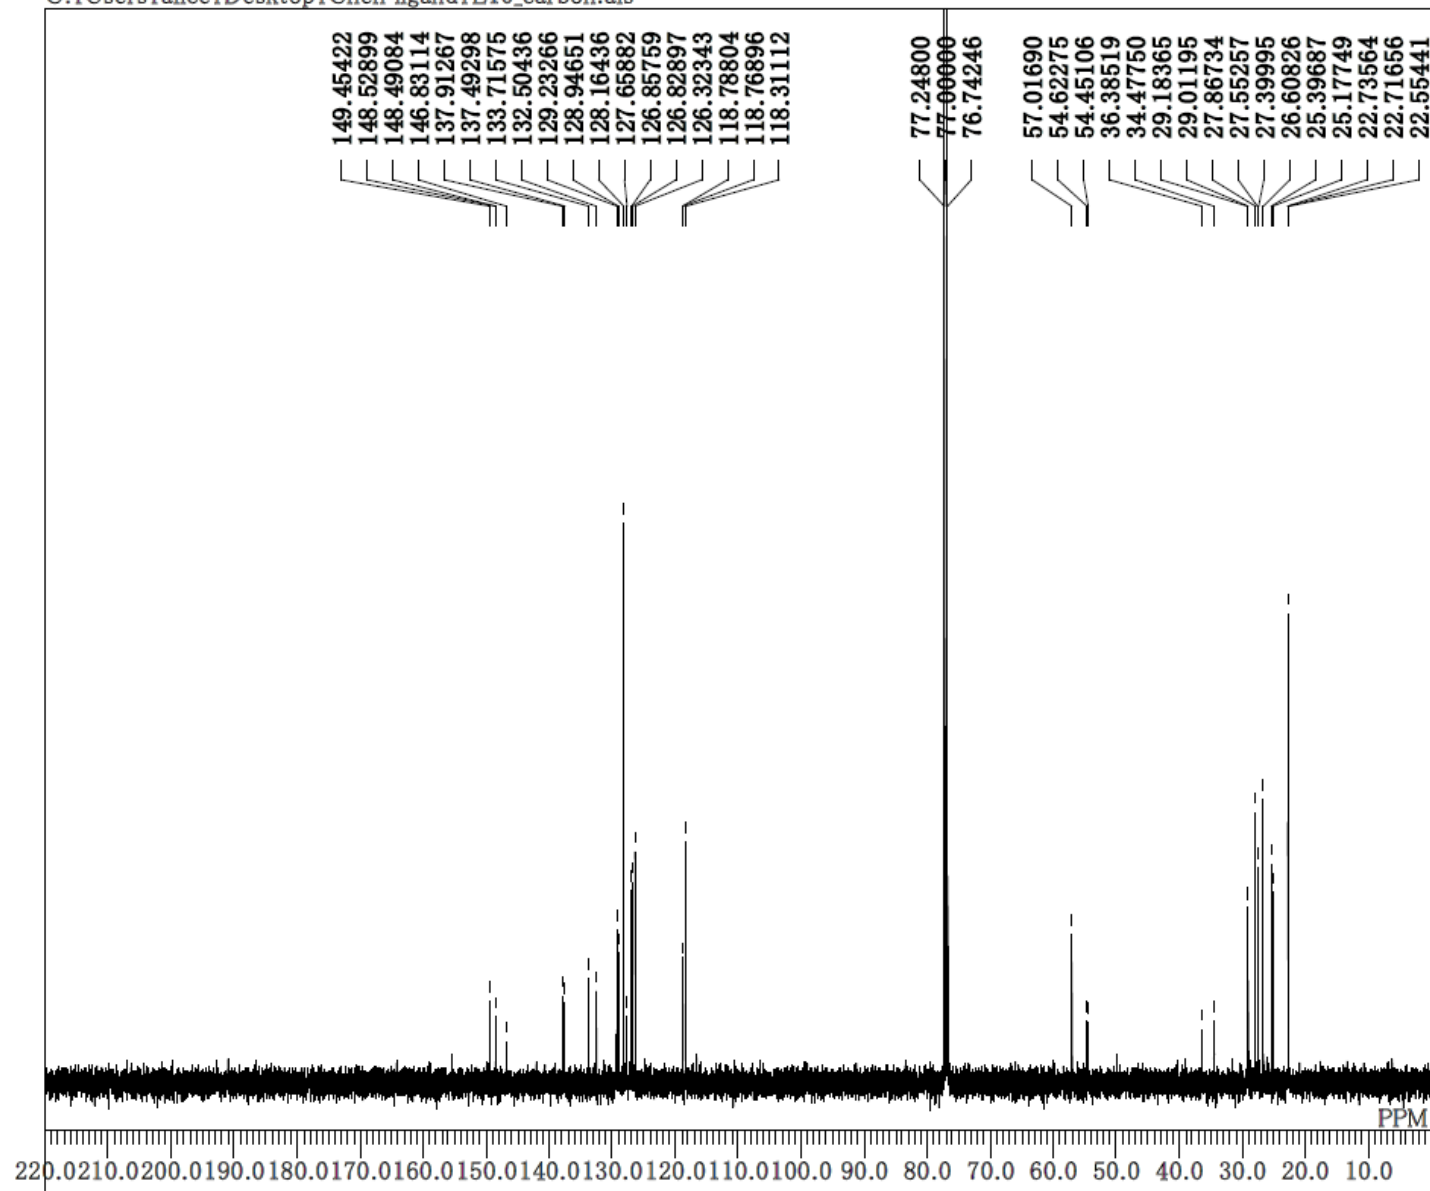

DFILE L10\_carbon.als  
 COMNT  
 DATIM 2020-04-17 20:35:44  
 OBNUC <sup>13</sup>C  
 EXMOD carbon.jxp  
 OBFRQ 125.77 MHz  
 OBSET 7.87 KHz  
 OBFIN 4.21 Hz  
 POINT 26214  
 FREQU 31446.54 Hz  
 SCANS 584  
 ACQTM 0.8336 sec  
 PD 2.0000 sec  
 PW1 3.40 usec  
 IRNUC <sup>1</sup>H  
 CTEMP 21.6 c  
 SLVNT CDCL<sub>3</sub>  
 EXREF 77.00 ppm  
 BF 0.12 Hz  
 RGAIN 60

C:\Users\Yalice\Desktop\Chen ligand\L10\_P.als

DFILE L10\_P.als  
COMNT  
DATIM 09-05-2020 03:11:38  
OBNUC 31P  
EXMOD carbon.jxp  
OBFRQ 158.59 MHz  
OBSET 7.99 KHz  
OBFIN 9.23 Hz  
POINT 26214  
FREQU 64102.56 Hz  
SCANS 100  
ACQTM 0.4089 sec  
PD 2.0000 sec  
PW1 4.80 usec  
IRNUC 1H  
CTEMP 20.7 c  
SLVNT CDCL3  
EXREF -6.00 ppm  
BF 0.12 Hz  
RGAIN 56

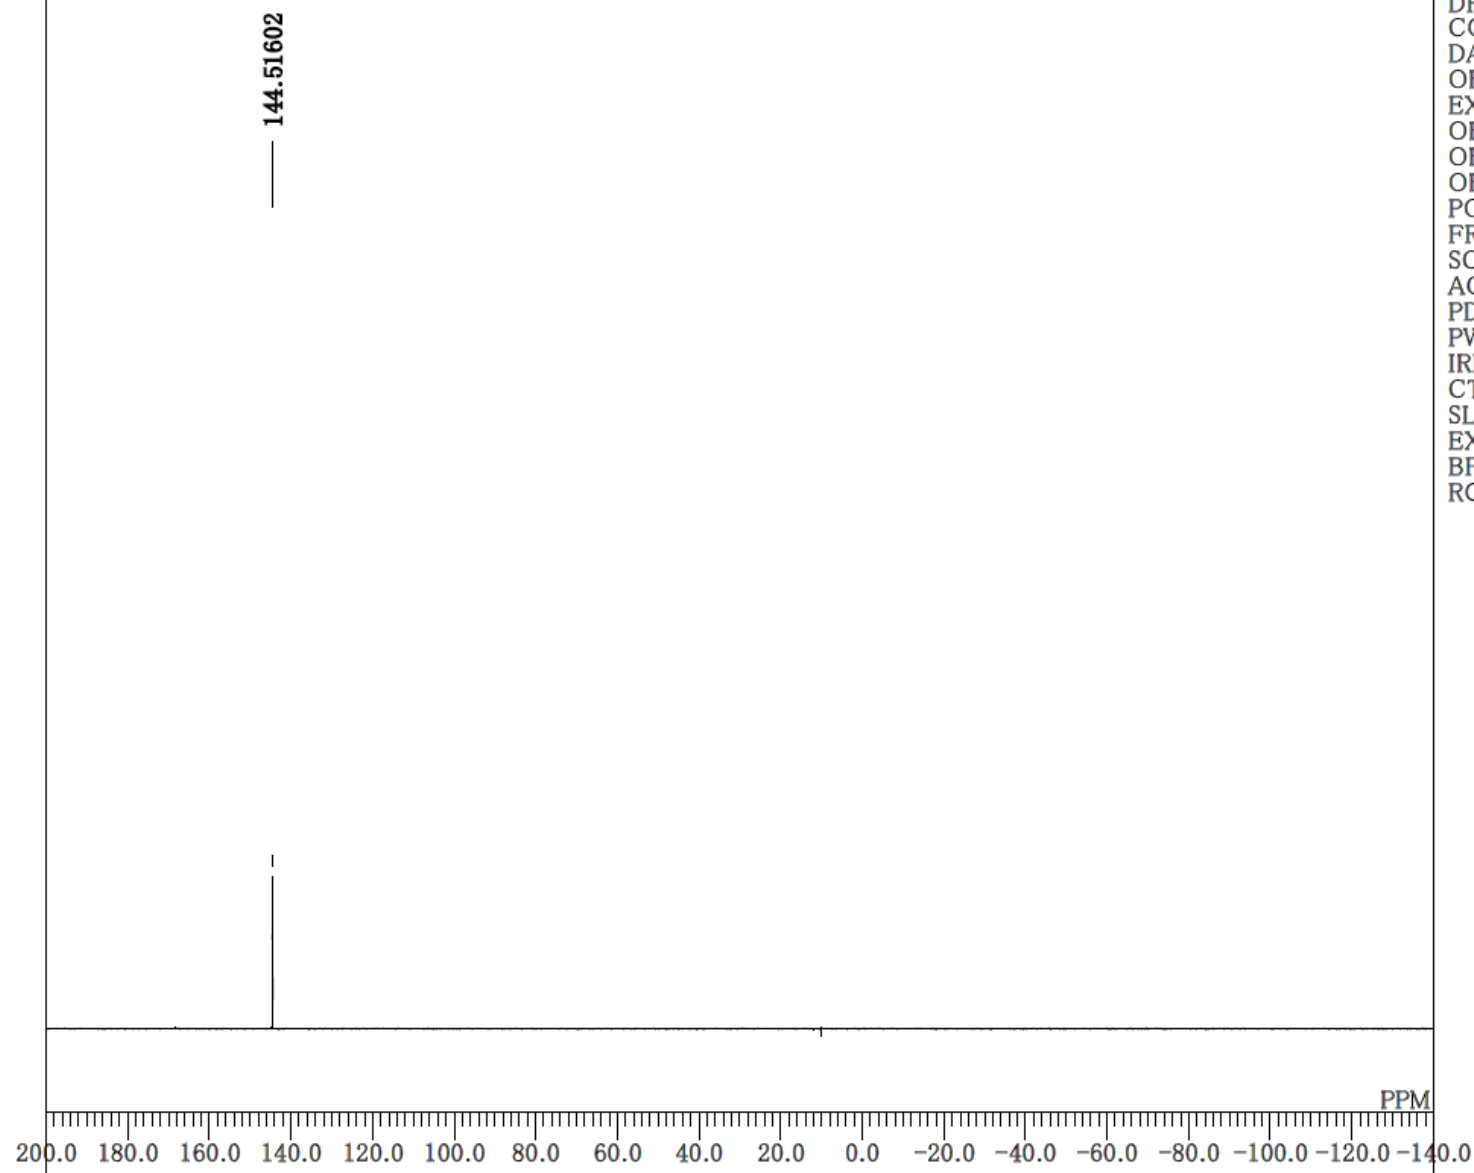

[illegible]

|       |                     |
|-------|---------------------|
| FILE  | L11_proton.als      |
| COMNT |                     |
| DATIM | 18-04-2020 16:16:58 |
| OBNUC | 1H                  |
| EXMOD | proton.jxp          |
| OBFRQ | 391.78 MHz          |
| OBSET | 8.51 KHz            |
| OBFIN | 3.34 Hz             |
| POINT | 13107               |
| FREQU | 5878.90 Hz          |
| SCANS | 8                   |
| ACQTM | 2.2295 sec          |
| PD    | 6.0000 sec          |
| PW1   | 5.17 usec           |
| IRNUC | 1H                  |
| CTEMP | 20.3 c              |
| SLVNT | CDCL3               |
| EXREF | 7.26 ppm            |
| BF    | 0.12 Hz             |
| RGAIN | 34                  |

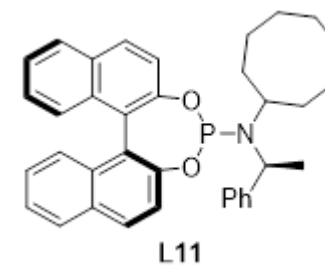

C:\Users\alice\Desktop\Chen ligand\L11\_carbon.als

DFILE L11\_carbon.als  
 COMNT  
 DATIM 18-04-2020 16:42:18  
 OBNUC <sup>13</sup>C  
 EXMOD carbon.jpg  
 OBFRQ 98.52 MHz  
 OBSET 4.64 KHz  
 OBFIN 8.74 Hz  
 POINT 26214  
 FREQU 24630.54 Hz  
 SCANS 434  
 ACQTM 1.0643 sec  
 PD 2.0000 sec  
 PW1 3.12 usec  
 IRNUC <sup>1</sup>H  
 CTEMP 20.4 c  
 SLVNT CDCL<sub>3</sub>  
 EXREF 77.00 ppm  
 BF 0.12 Hz  
 RGAIN 60

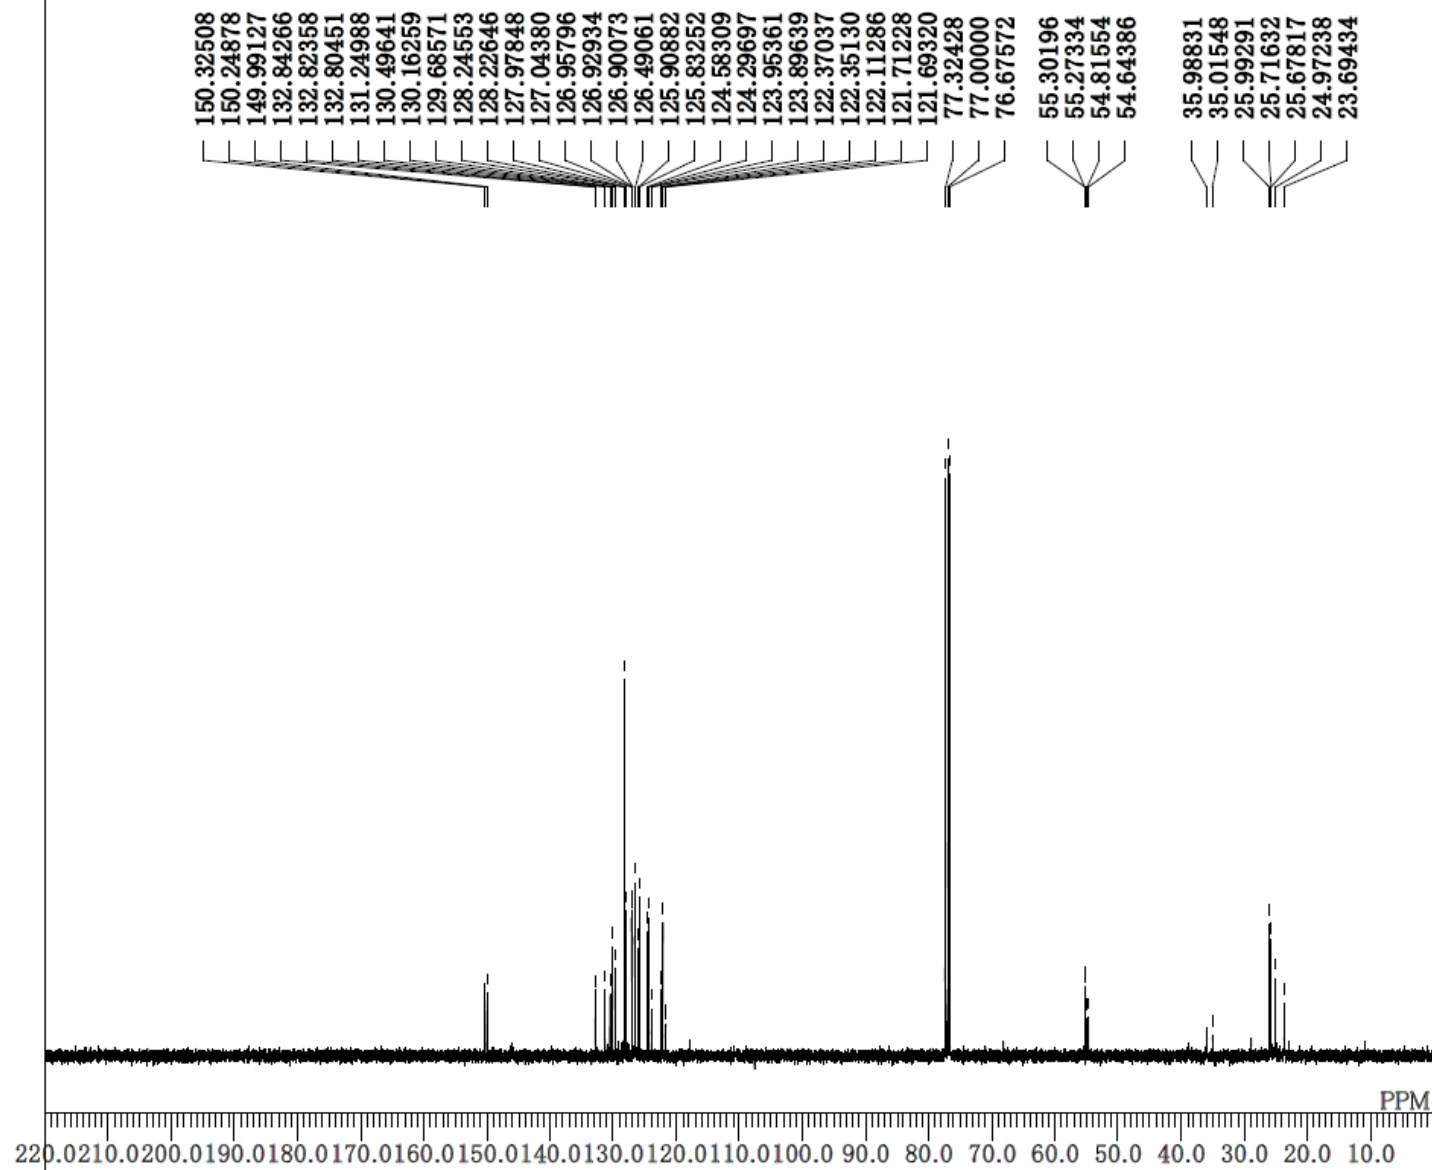

C:\Users\alice\Desktop\Chen ligand\L11\_P.als

DFILE L11\_P.als  
COMNT  
DATIM 09-05-2020 04:31:21  
OBNUC 31P  
EXMOD carbon.jxp  
OBFRQ 158.59 MHz  
OBSET 7.99 KHz  
OBFIN 9.23 Hz  
POINT 26214  
FREQU 64102.56 Hz  
SCANS 74  
ACQTM 0.4089 sec  
PD 2.0000 sec  
PW1 4.80 usec  
IRNUC 1H  
CTEMP 20.7 c  
SLVNT CDCL3  
EXREF -6.00 ppm  
BF 0.12 Hz  
RGAIN 56

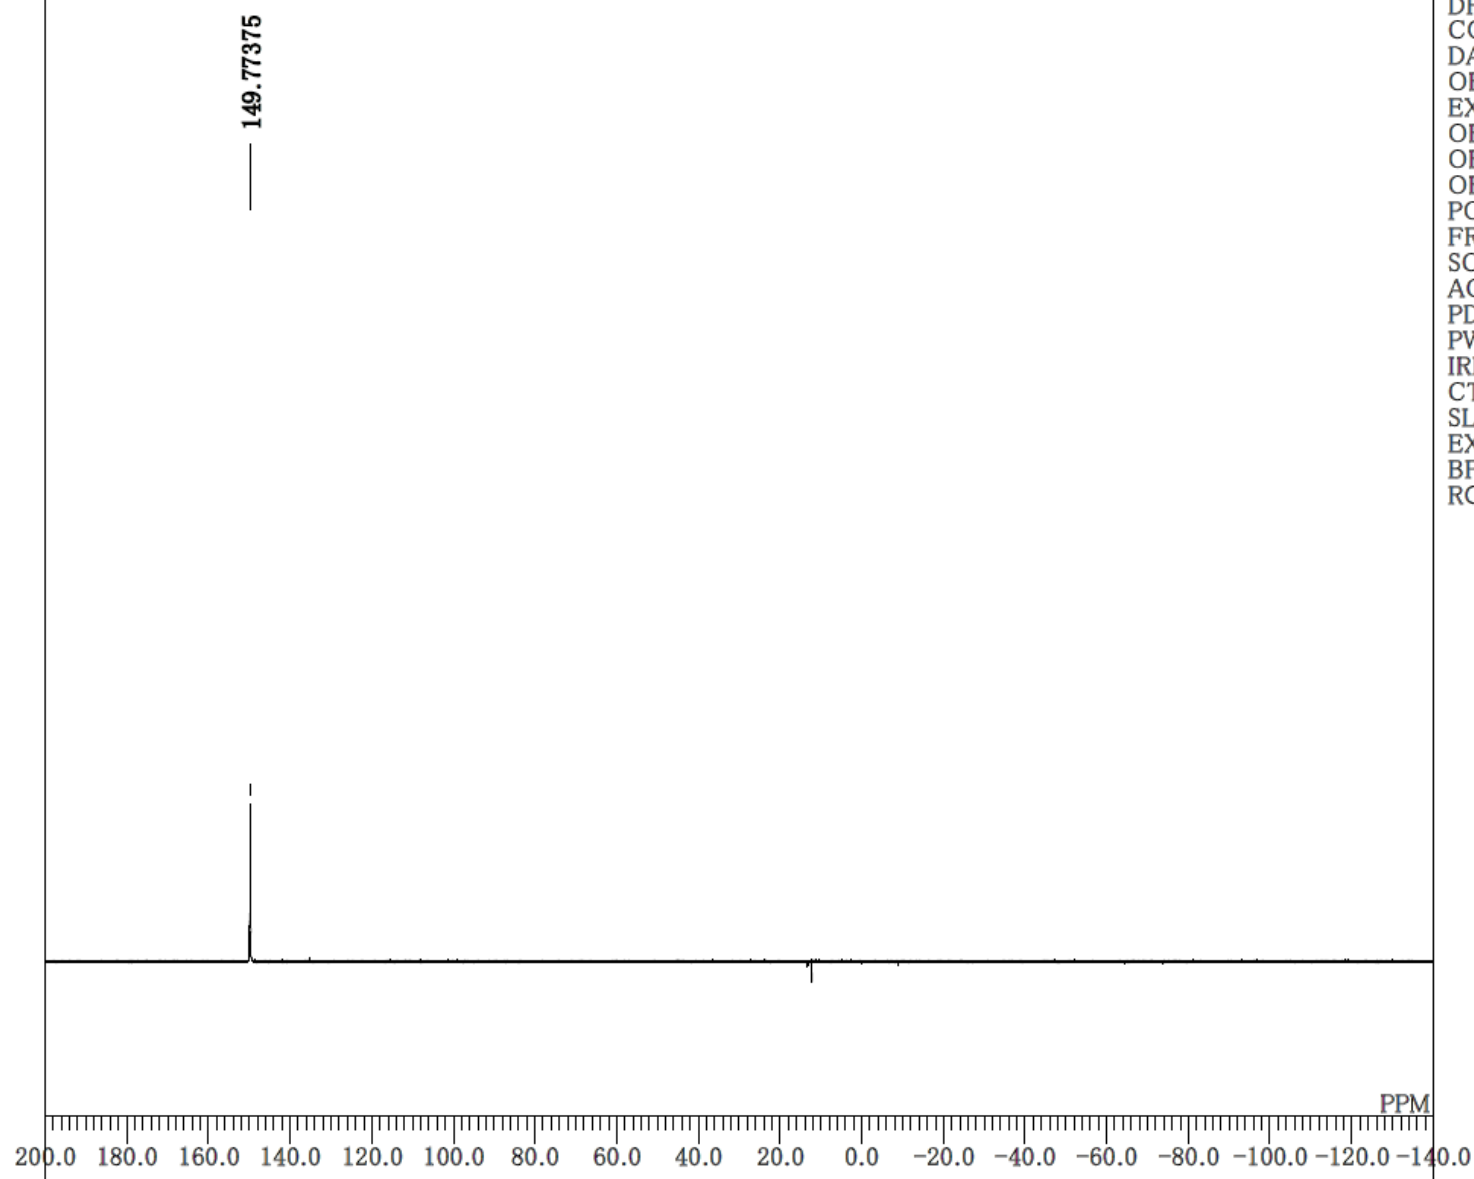



<sup>1</sup>H NMR spectrum (CDCl<sub>3</sub>) of compound 6. The x-axis represents the chemical shift in PPM, ranging from 0 to 10. The spectrum shows several sharp singlet peaks. Key peaks are labeled with their chemical shifts: 10.292, 10.099, 3.865, 1.937, 2.975, 2.974, 0.945, 0.946, 0.948, 2.036, 2.072, 1.924, 1.849, 1.803, and 1.806. Integration values are provided below the baseline for each major peak group.

|       |                     |
|-------|---------------------|
| DFILE | L12_proton.als      |
| COMNT |                     |
| DATIM | 2020-04-17 22:47:54 |
| OBNUC | 1H                  |
| EXMOD | proton.jxp          |
| OBFRQ | 500.16 MHz          |
| OBSET | 2.41 KHz            |
| OBFIN | 6.01 Hz             |
| POINT | 13107               |
| FREQU | 7507.51 Hz          |
| SCANS | 8                   |
| ACQTM | 1.7459 sec          |
| PD    | 6.0000 sec          |
| PW1   | 5.55 usec           |
| IRNUC | 1H                  |
| CTEMP | 21.3 c              |
| SLVNT | CDCL3               |
| EXREF | 7.26 ppm            |
| BF    | 0.12 Hz             |
| RGAIN | 40                  |

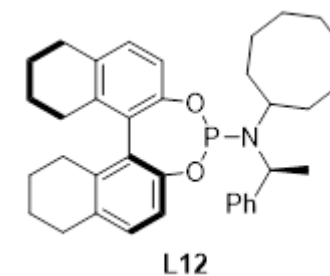

C:\Users\alice\Desktop\Chen ligand\L12\_carbon.als

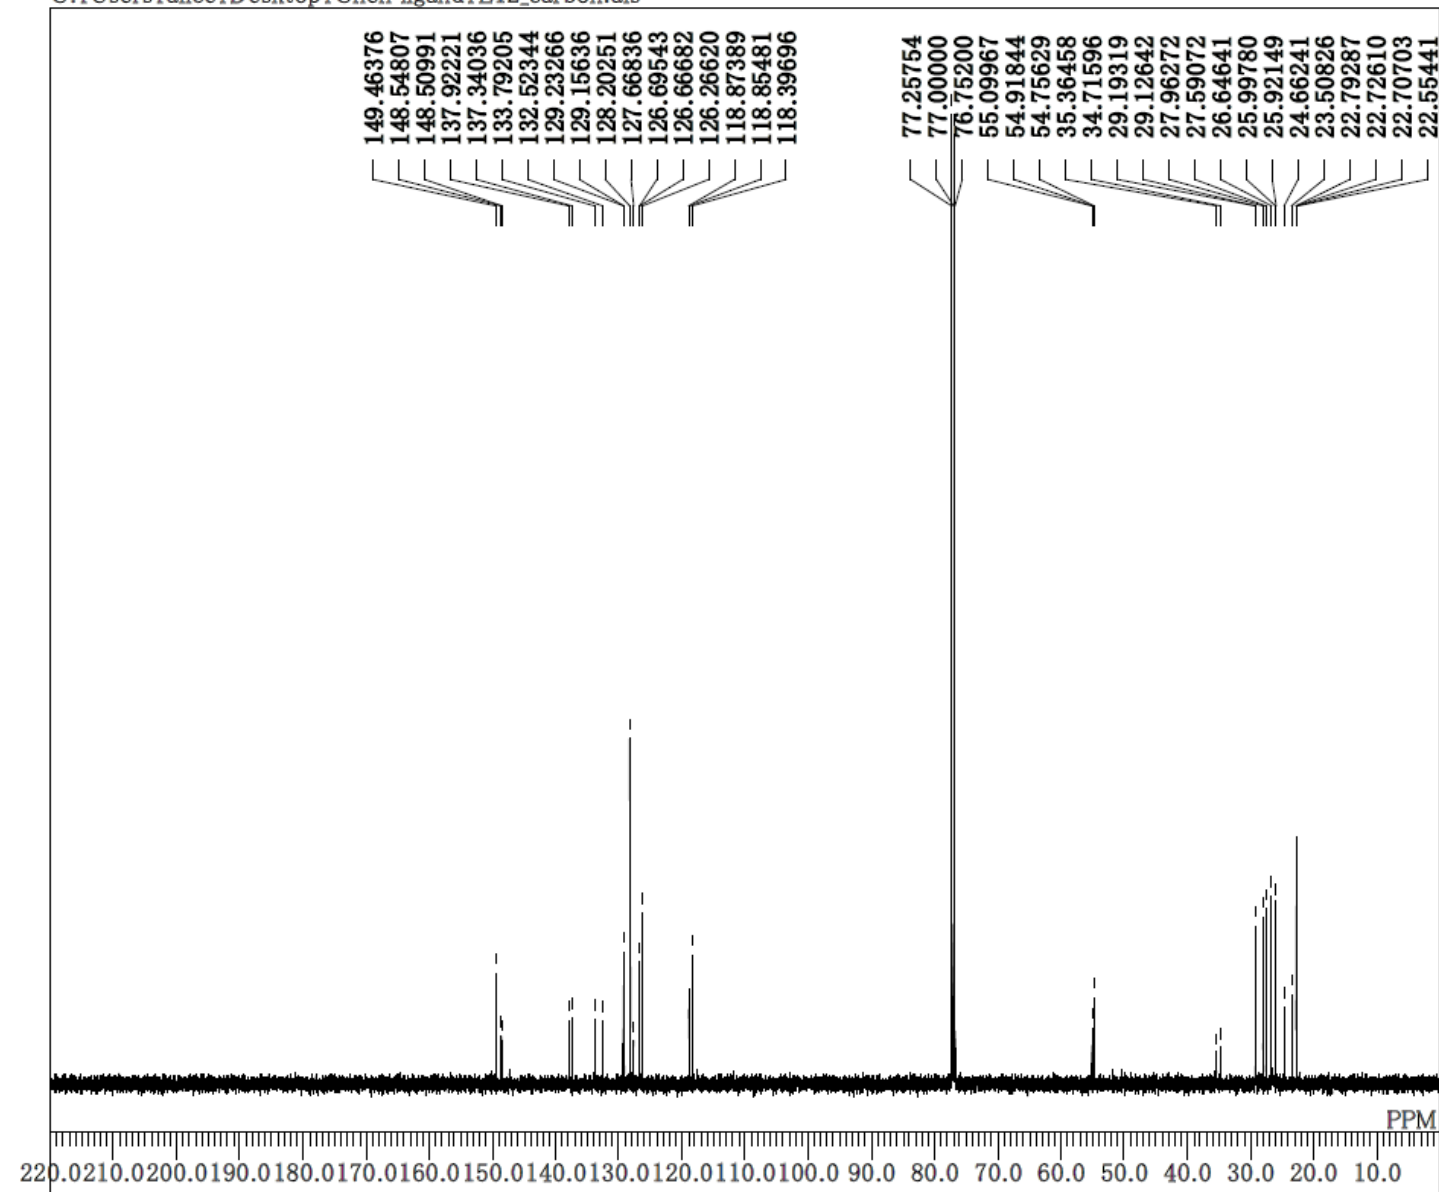

DFILE L12\_carbon.als  
 COMNT  
 DATIM 2020-04-17 22:52:23  
 OBNUC 13C  
 EXMOD carbon.jpg  
 OBFRQ 125.77 MHz  
 OBSET 7.87 KHz  
 OBFIN 4.21 Hz  
 POINT 26214  
 FREQU 31446.54 Hz  
 SCANS 421  
 ACQTM 0.8336 sec  
 PD 2.0000 sec  
 PW1 3.40 usec  
 IRNUC 1H  
 CTEMP 21.6 c  
 SLVNT CDCL3  
 EXREF 77.00 ppm  
 BF 0.12 Hz  
 RGAIN 60

C:\Users\alice\Desktop\Chen ligand\L12\_P.als

DFILE L12\_P.als  
COMNT  
DATIM 09-05-2020 04:21:25  
OBNUC 31P  
EXMOD carbon.jxp  
OBFRQ 158.59 MHz  
OBSET 7.99 KHz  
OBFIN 9.23 Hz  
POINT 26214  
FREQU 64102.56 Hz  
SCANS 85  
ACQTM 0.4089 sec  
PD 2.0000 sec  
PW1 4.80 usec  
IRNUC 1H  
CTEMP 20.6 c  
SLVNT CDCL3  
EXREF -6.00 ppm  
BF 0.12 Hz  
RGAIN 56

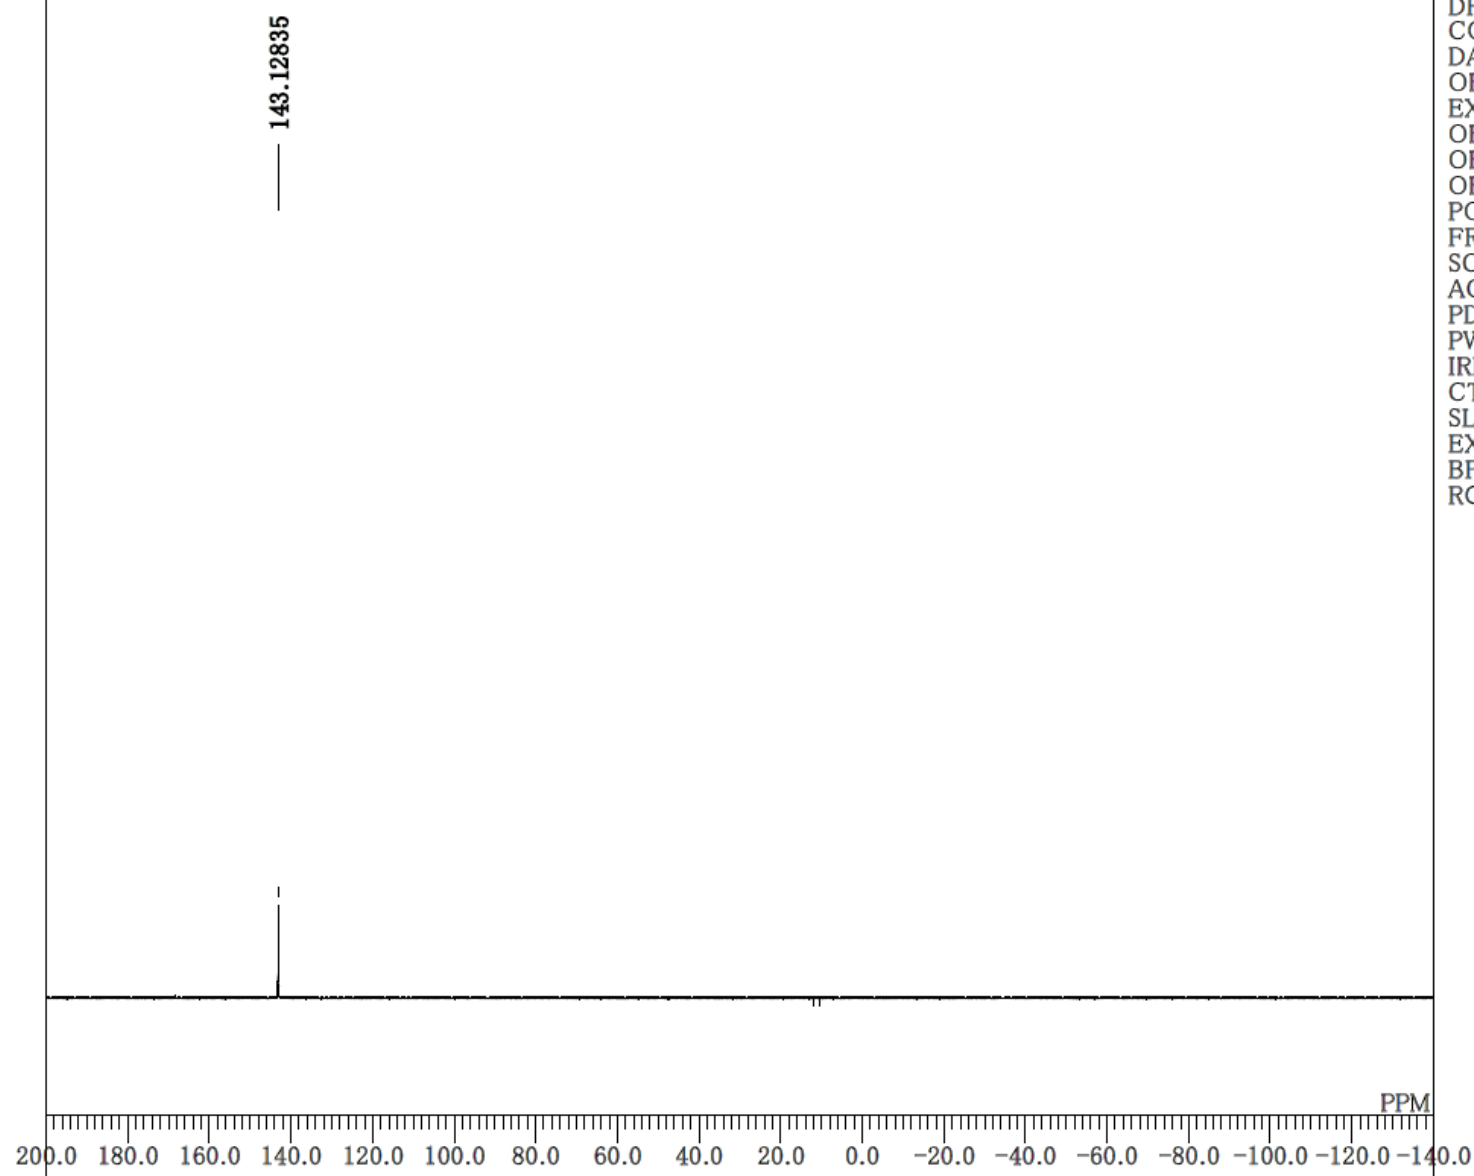

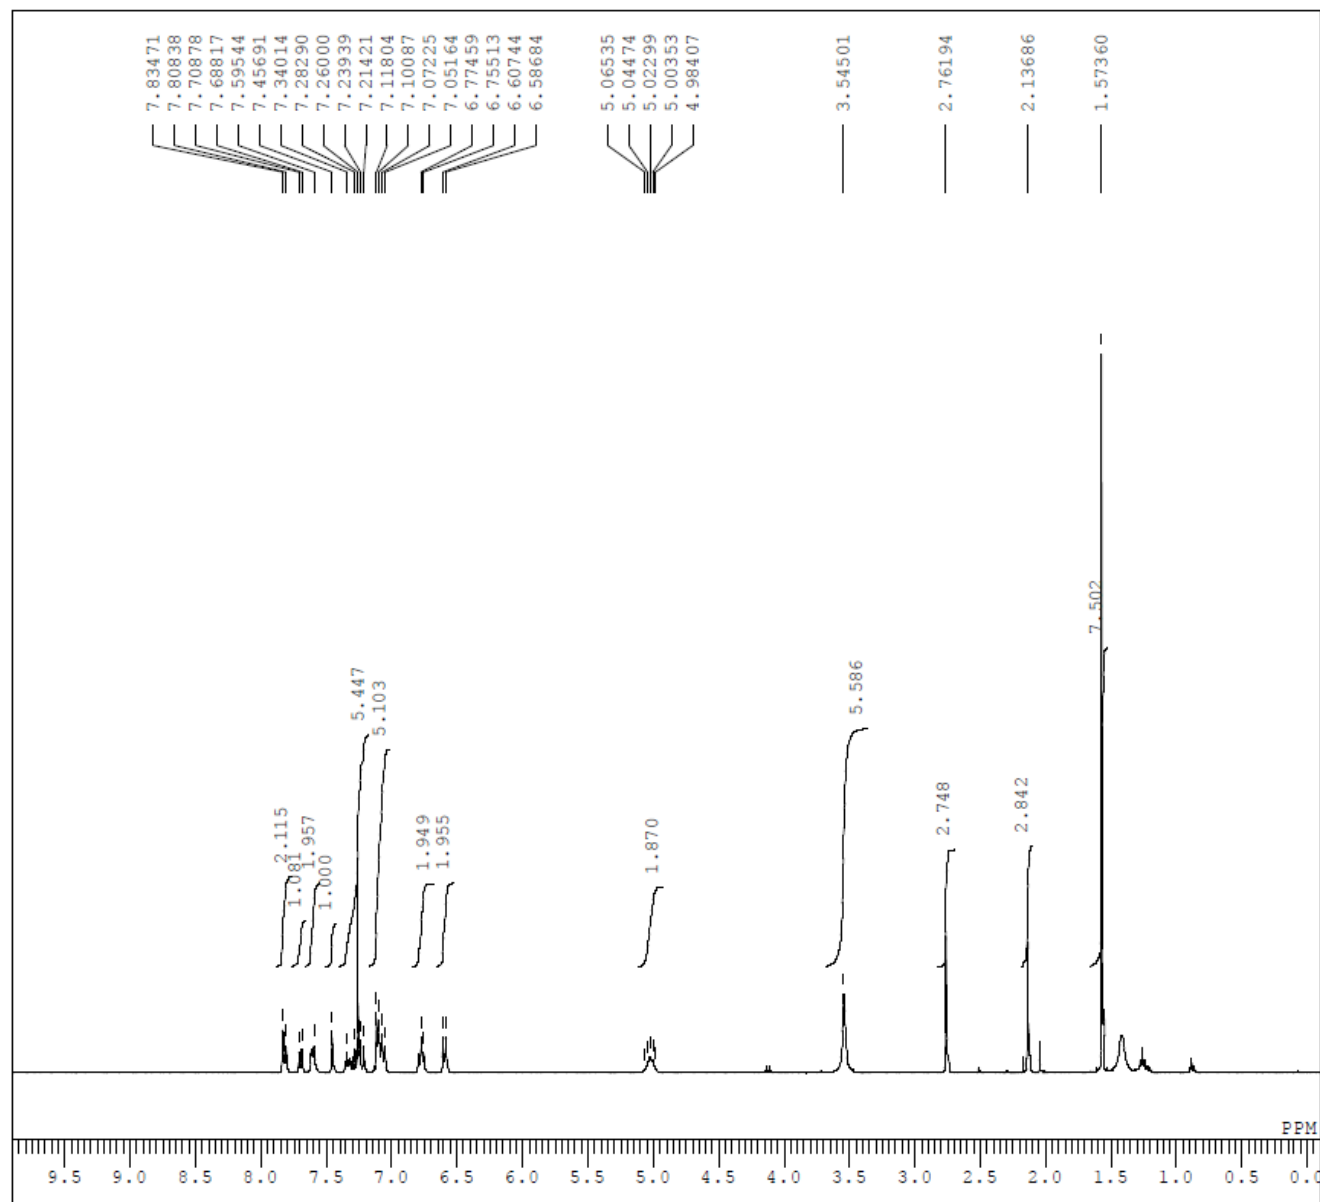

```

DFILE  L14_proton.als
COMNT
DATIM   21-06-2020 10:41:49
OBNUC   1H
EXMOD   proton.jxp
OBFRQ   391.78 MHz
OBSET   8.51 KHz
OBFIN   3.34 Hz
POINT   13107
FREQU   5878.90 Hz
SCANS    8
ACQTM   2.2295 sec
PD       6.0000 sec
PWL      5.17 usec
IRNUC   1H
CTEMP   21.0 c
SLVNT   CDCL3
EXREF   7.26 ppm
BF       0.12 Hz
RGAIN    46
  
```

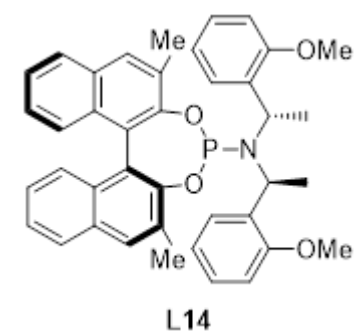

C:\Users\Valice\Desktop\Chen ligand\L14\_carbon.als

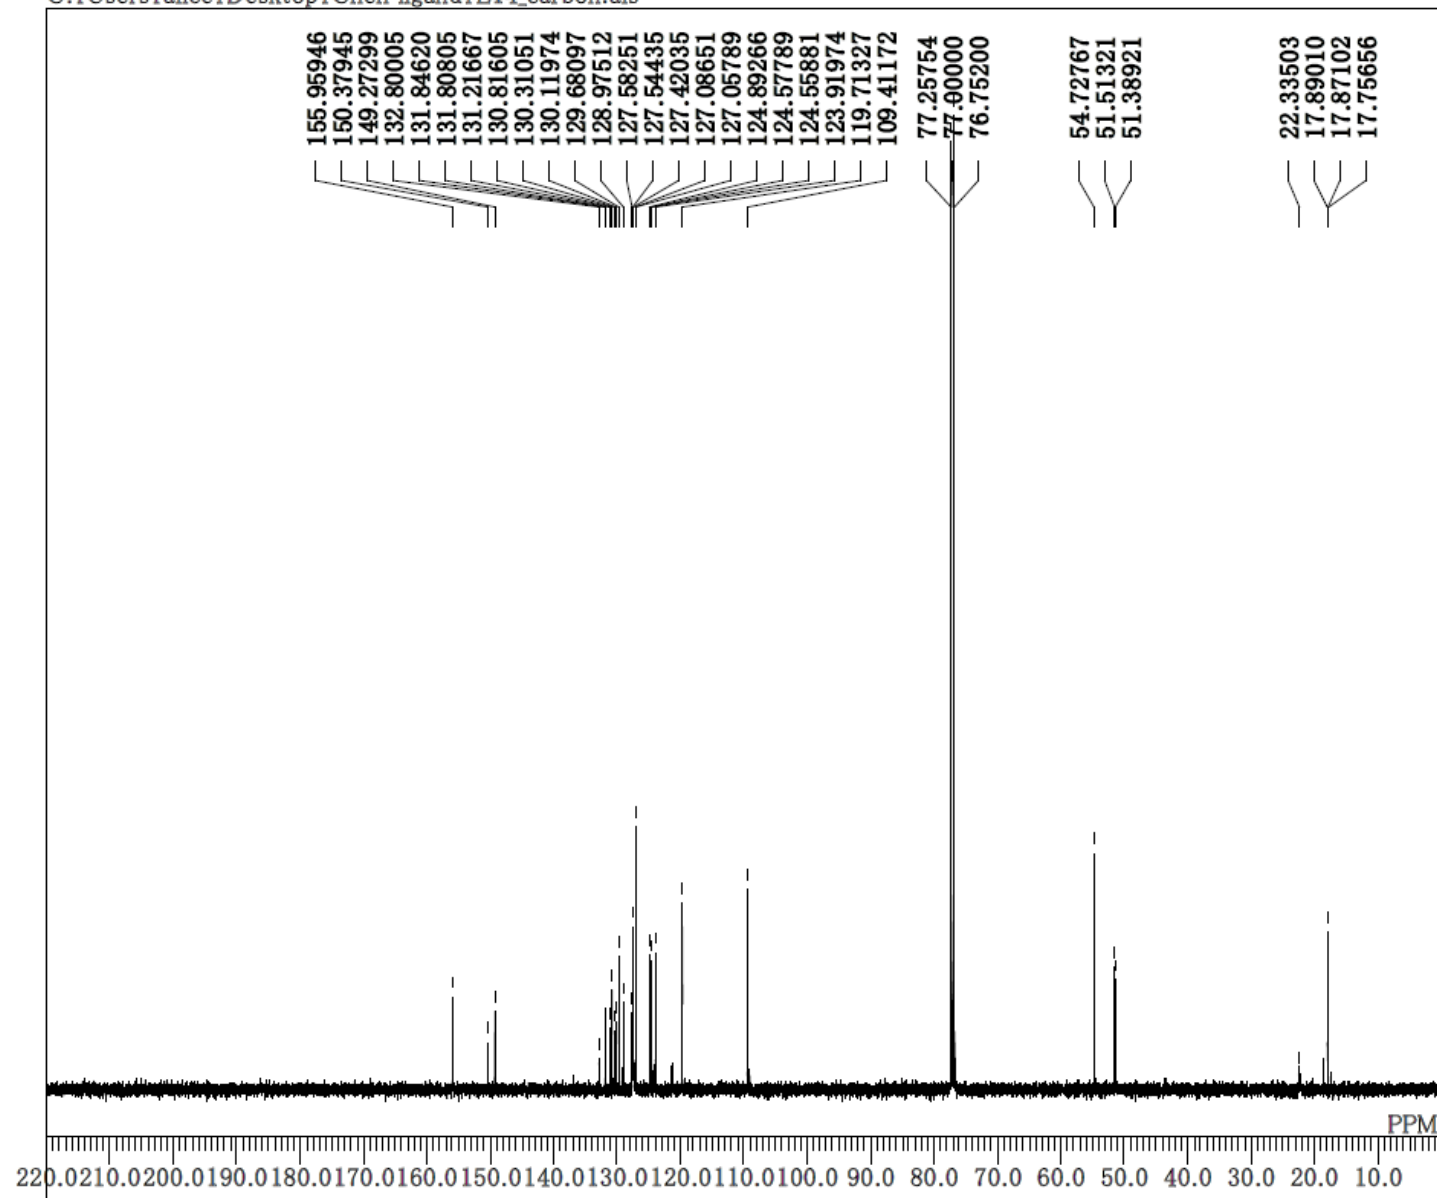

DFILE L14\_carbon.als  
 COMNT  
 DATIM 2020-04-18 19:40:09  
 OBNUC 13C  
 EXMOD carbon.jxp  
 OBFRQ 125.77 MHz  
 OBSET 7.87 KHz  
 OBFIN 4.21 Hz  
 POINT 26214  
 FREQU 31446.54 Hz  
 SCANS 681  
 ACQTM 0.8336 sec  
 PD 2.0000 sec  
 PW1 3.40 usec  
 IRNUC 1H  
 CTEMP 21.6 c  
 SLVNT CDCL3  
 EXREF 77.00 ppm  
 BF 0.12 Hz  
 RGAIN 60

I:\L14\_P-1-1.als

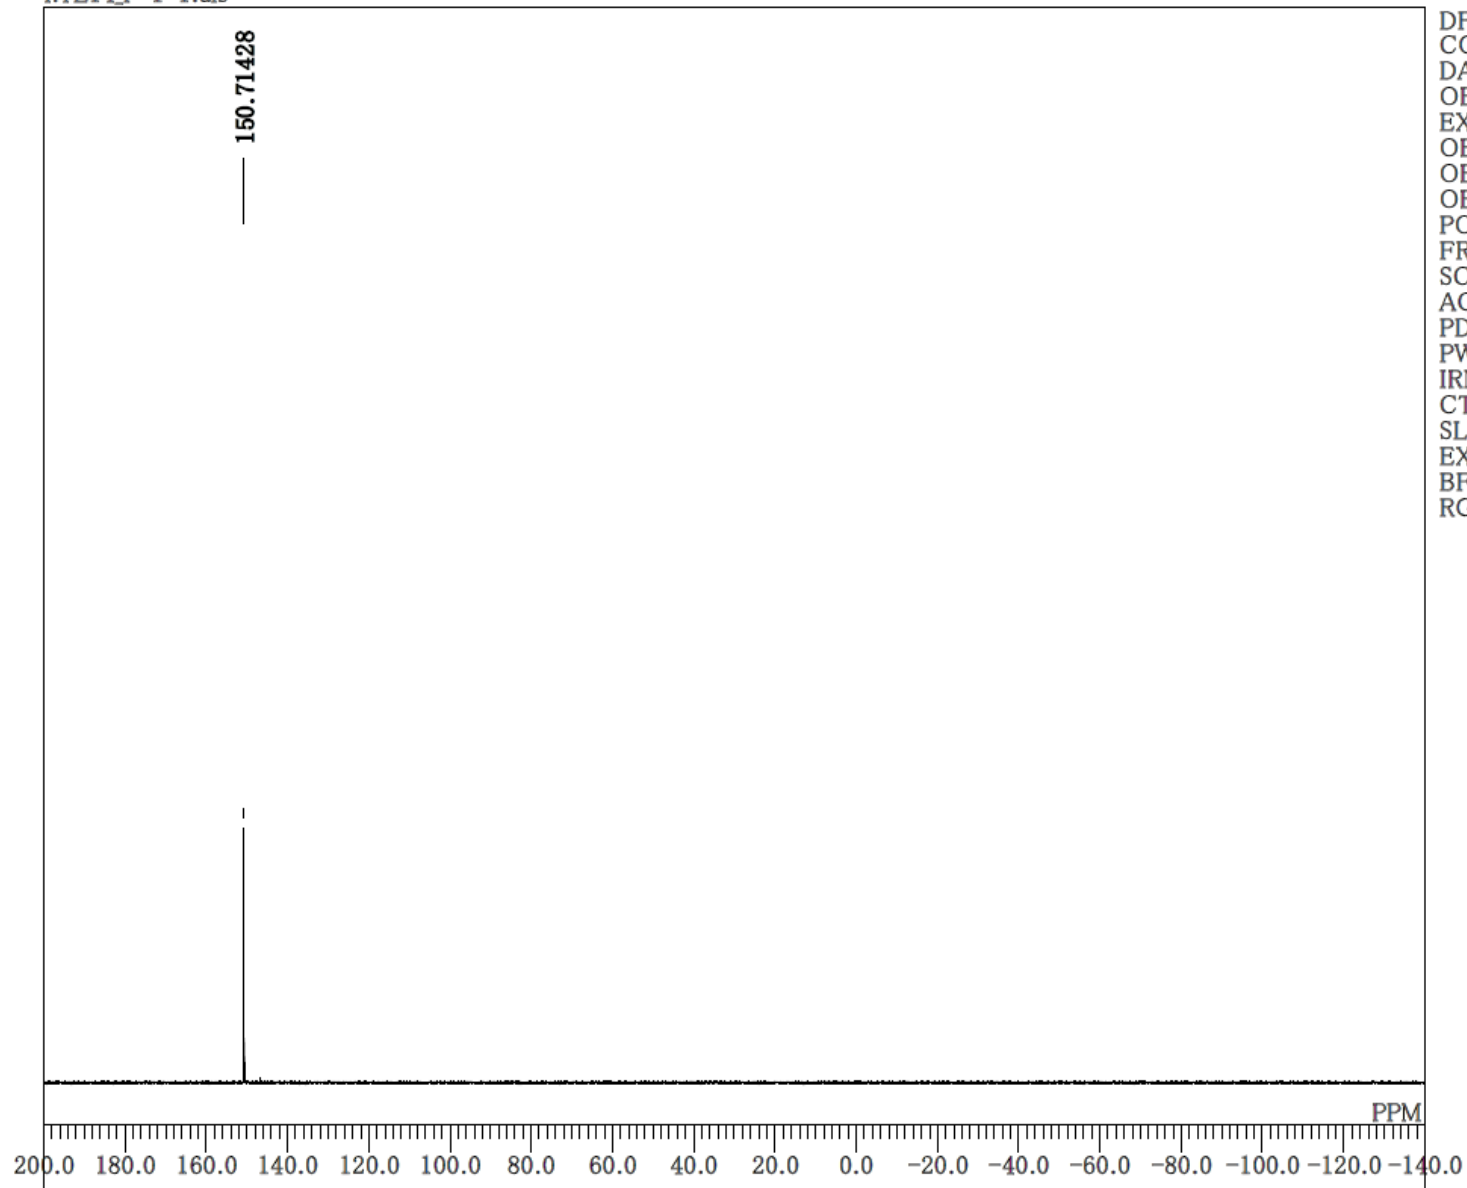

DFILE L14\_P-1-1.als  
COMNT  
DATIM 22-06-2020 20:07:04  
OBNUC 31P  
EXMOD carbon.jxp  
OBFRQ 158.59 MHz  
OBSET 7.99 KHz  
OBFIN 9.23 Hz  
POINT 26214  
FREQU 64102.56 Hz  
SCANS 102  
ACQTM 0.4089 sec  
PD 2.0000 sec  
PW1 4.80 usec  
IRNUC 1H  
CTEMP 21.3 c  
SLVNT CDCL3  
EXREF -6.00 ppm  
BF 0.02 Hz  
RGAIN 56

C:\Users\valice\Desktop\Chen ligand\L16\_proton.als

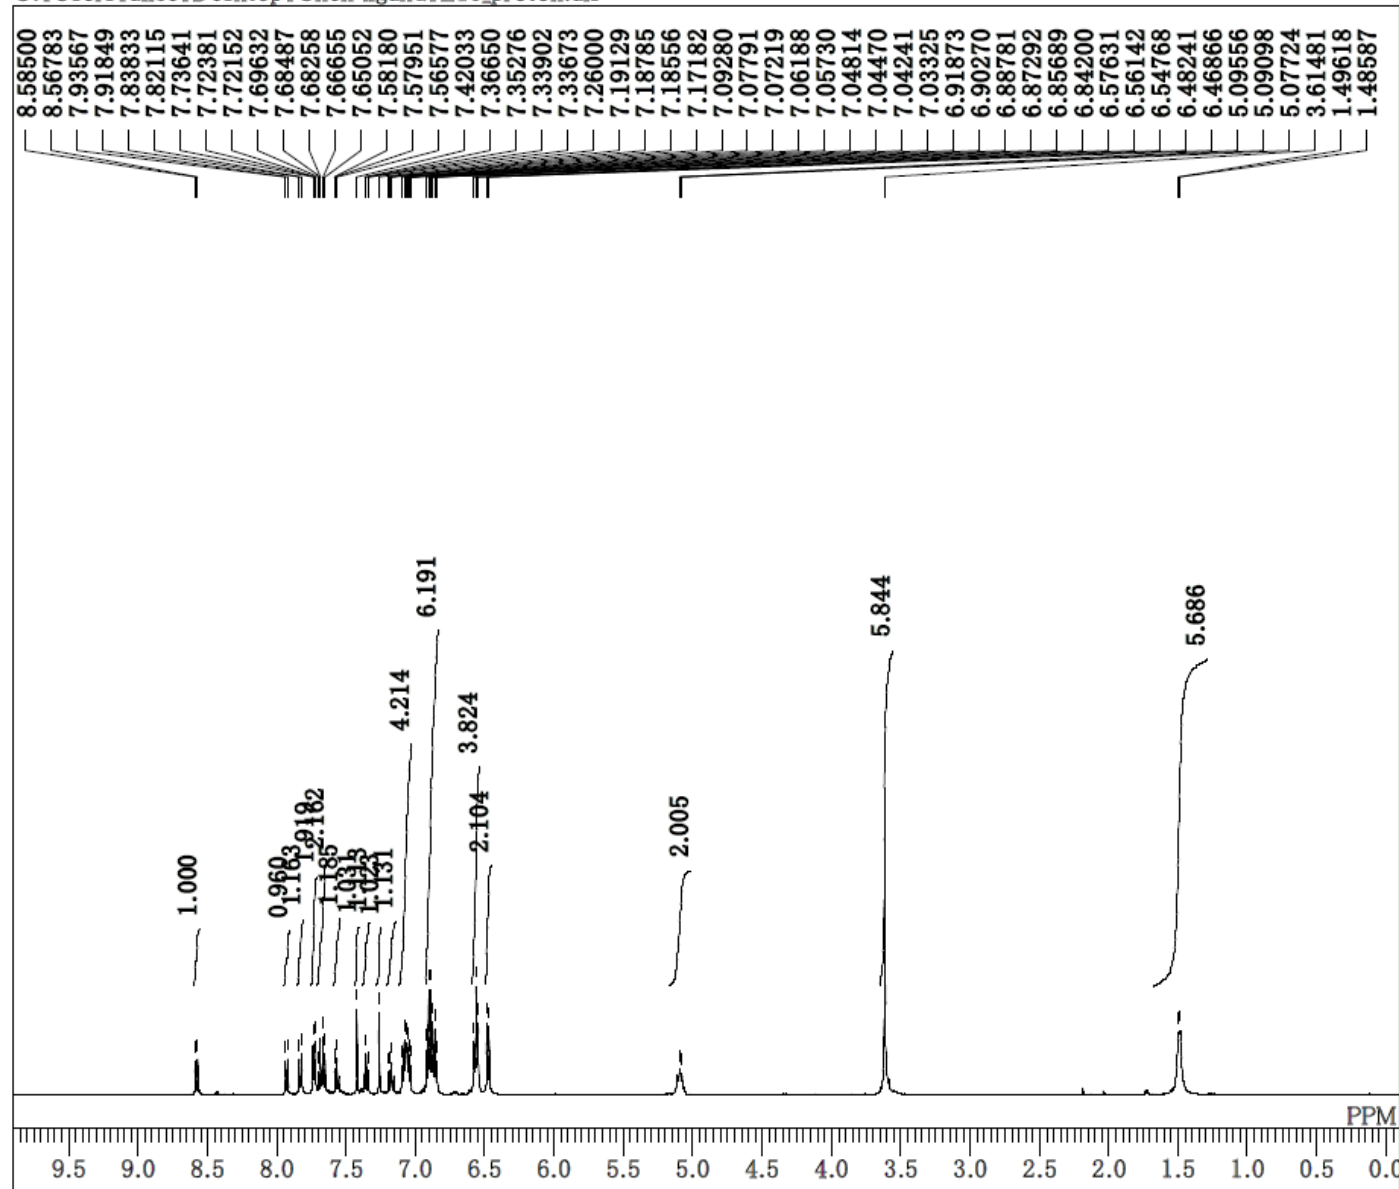

DFILE L16\_proton.als  
 COMNT  
 DATIM 2020-04-18 19:35:43  
 OBNUC 1H  
 EXMOD proton.jpg  
 OBFRQ 500.16 MHz  
 OBSET 2.41 KHz  
 OBFIN 6.01 Hz  
 POINT 13107  
 FREQU 7507.51 Hz  
 SCANS 8  
 ACQTM 1.7459 sec  
 PD 6.0000 sec  
 PW1 5.55 usec  
 IRNUC 1H  
 CTEMP 21.5 c  
 SLVNT CDCL3  
 EXREF 7.26 ppm  
 BF 0.12 Hz  
 RGAIN 30

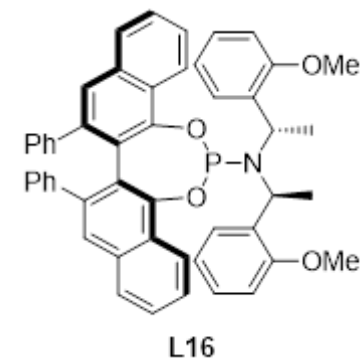

C:\Users\Valice\Desktop\Chen ligand\L16\_carbon.als

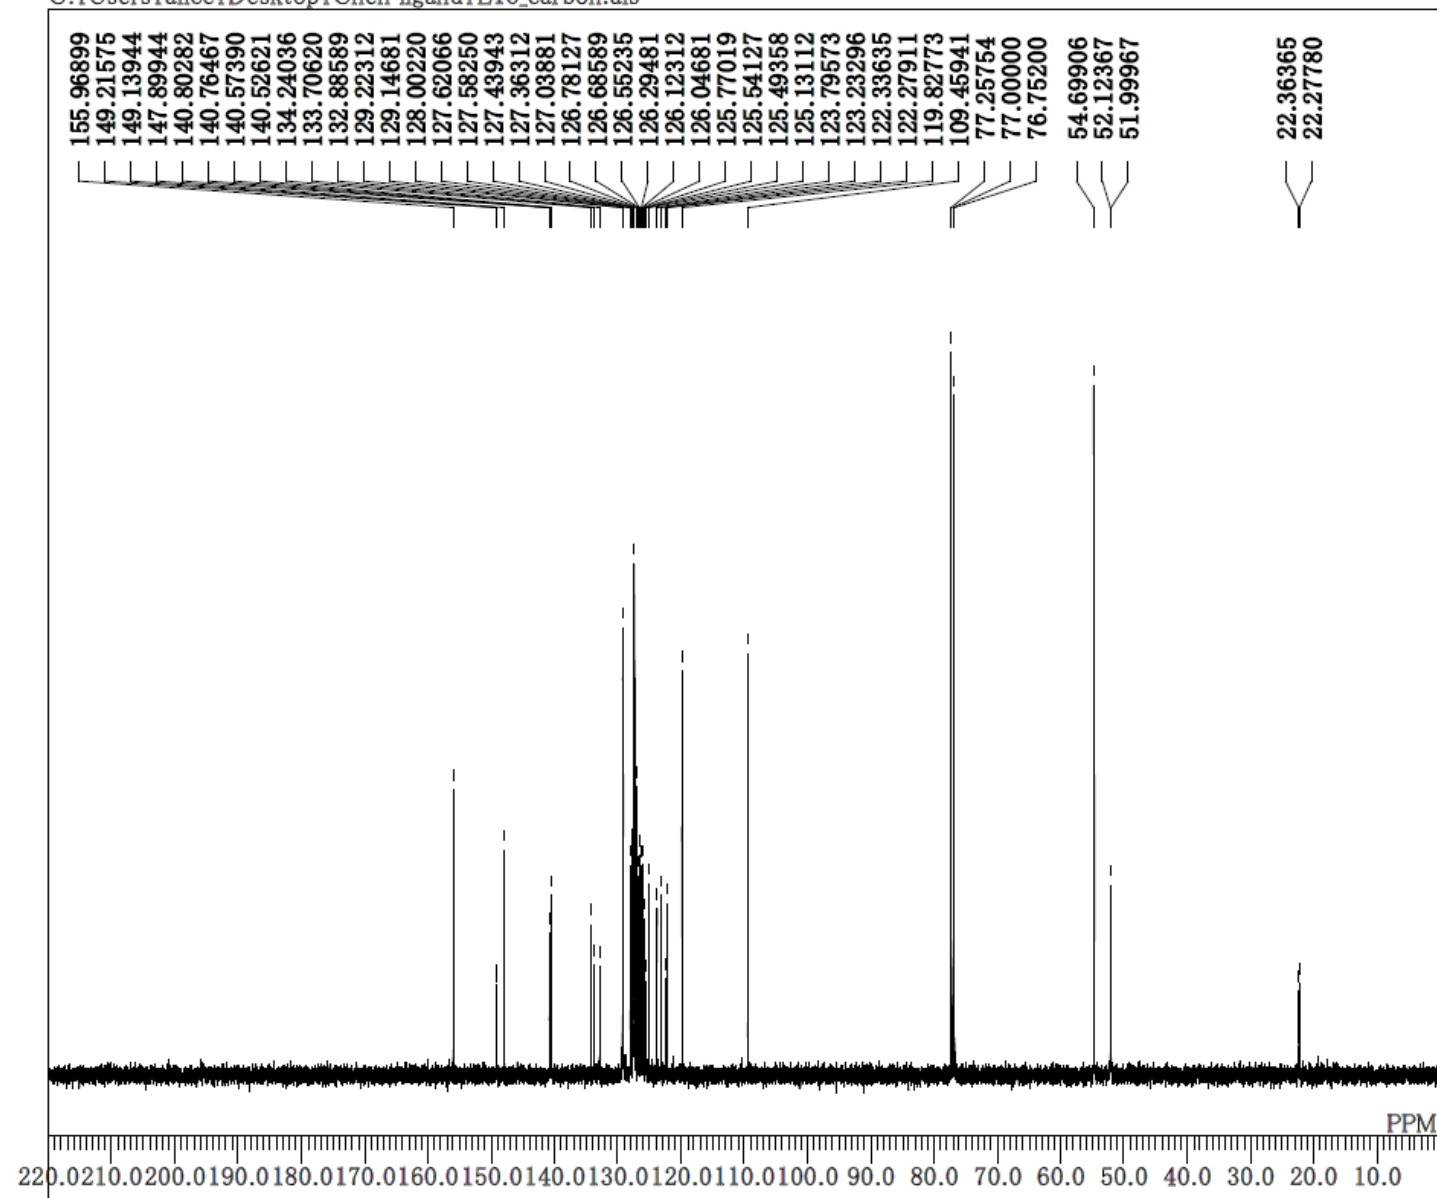

DFILE L16\_carbon.als  
 COMNT  
 DATIM 2020-04-18 19:24:09  
 OBNUC 13C  
 EXMOD carbon.jxp  
 OBFRQ 125.77 MHz  
 OBSET 7.87 KHz  
 OBFIN 4.21 Hz  
 POINT 26214  
 FREQU 31446.54 Hz  
 SCANS 221  
 ACQTM 0.8336 sec  
 PD 2.0000 sec  
 PW1 3.40 usec  
 IRNUC 1H  
 CTEMP 21.5 c  
 SLVNT CDCL3  
 EXREF 77.00 ppm  
 BF 0.12 Hz  
 RGAIN 60



C:\Users\Valice\Desktop\Chen ligand\L16\_P.als

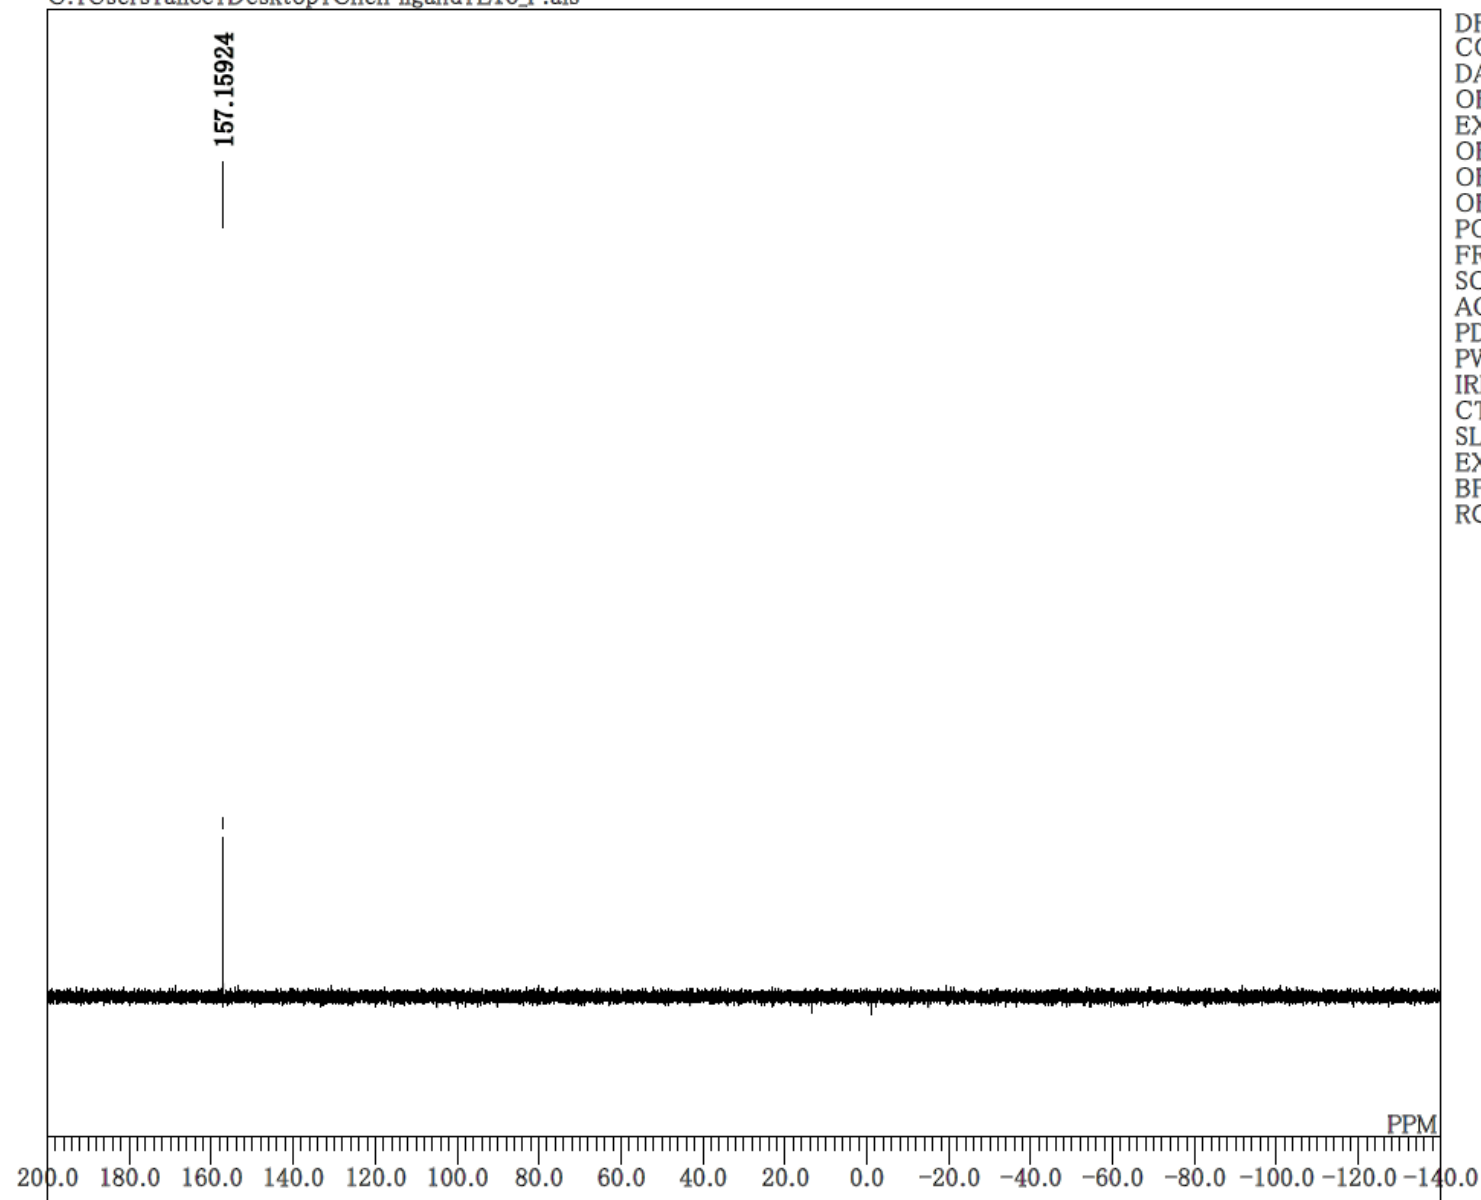

DFILE L16\_P.als  
COMNT  
DATIM 09-05-2020 17:53:20  
OBNUC 31P  
EXMOD carbon.jxp  
OBFRQ 158.59 MHz  
OBSET 7.99 KHz  
OBFIN 9.23 Hz  
POINT 26214  
FREQU 64102.56 Hz  
SCANS 6  
ACQTM 0.0000 sec  
PD 2.0000 sec  
PW1 4.80 usec  
IRNUC 1H  
CTEMP 20.6 c  
SLVNT CDCL3  
EXREF -6.00 ppm  
BF 0.12 Hz  
RGAIN 56

C:\Users\alice\Desktop\Chen ligand\L17\_proton.als

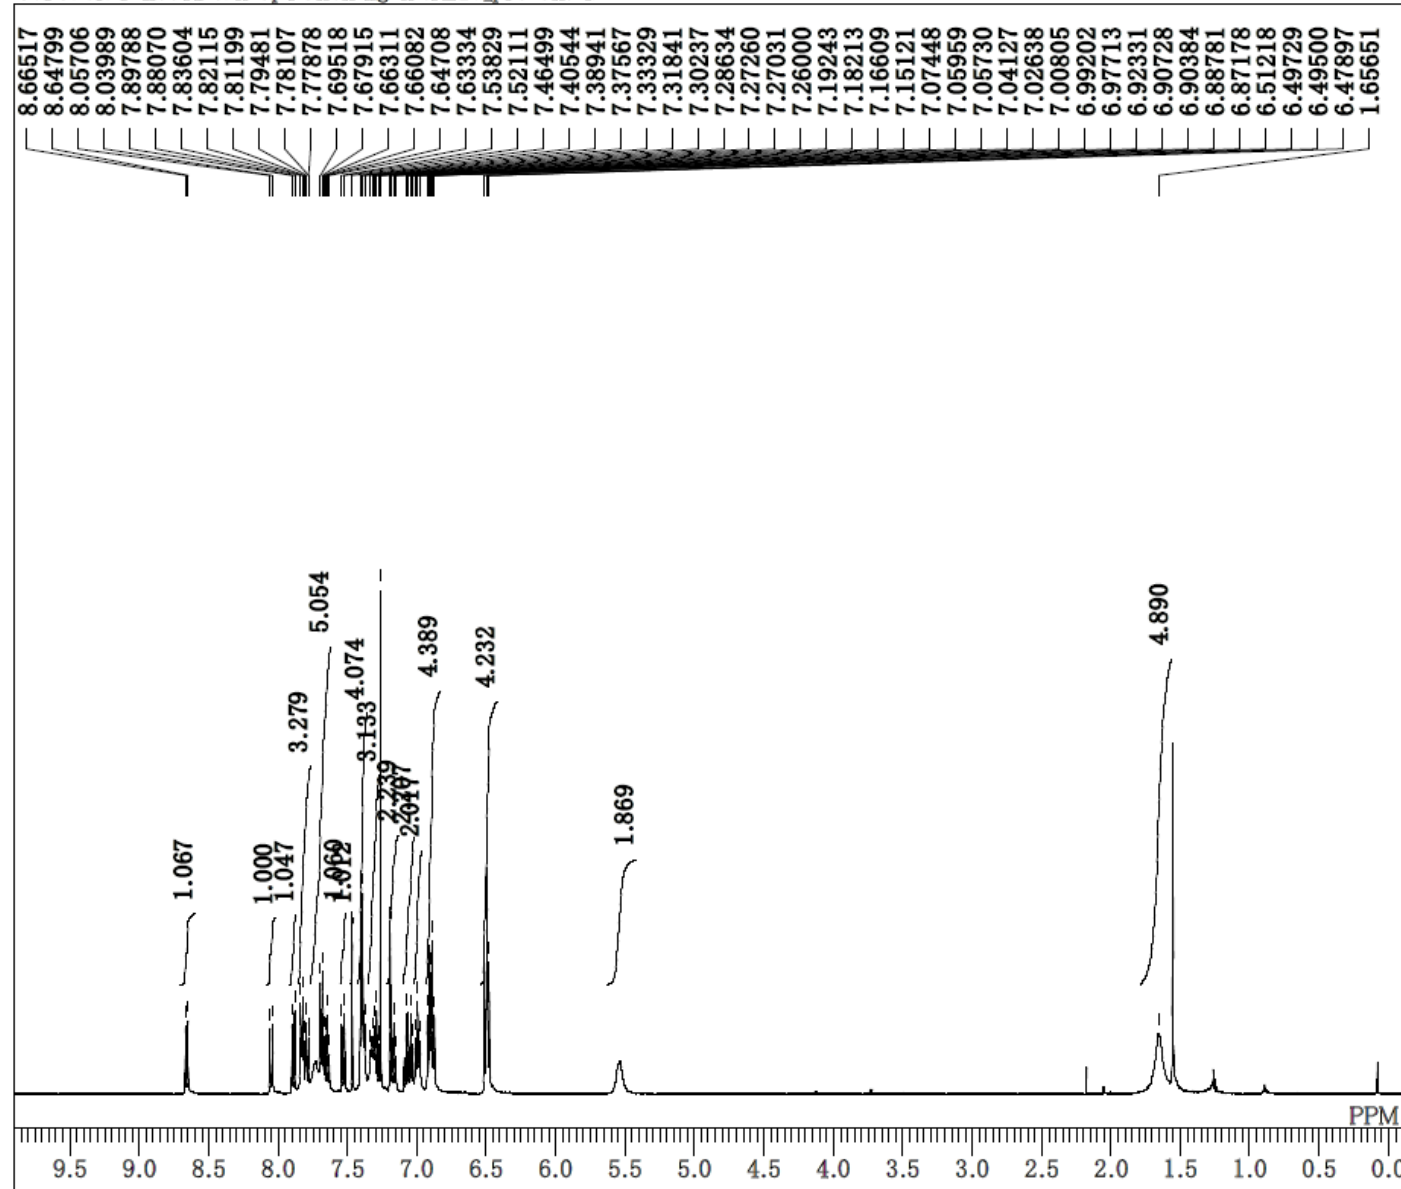

DFILE L17\_proton.als  
 COMNT  
 DATIM 2020-04-24 17:15:10  
 OBNUC <sup>1</sup>H  
 EXMOD proton.jxp  
 OBFRQ 500.16 MHz  
 OBSET 2.41 KHz  
 OBFIN 6.01 Hz  
 POINT 13107  
 FREQU 7507.51 Hz  
 SCANS 8  
 ACQTM 1.7459 sec  
 PD 6.0000 sec  
 PW1 5.55 usec  
 IRNUC <sup>1</sup>H  
 CTEMP 20.7 c  
 SLVNT CDCL<sub>3</sub>  
 EXREF 7.26 ppm  
 BF 0.12 Hz  
 RGAIN 40

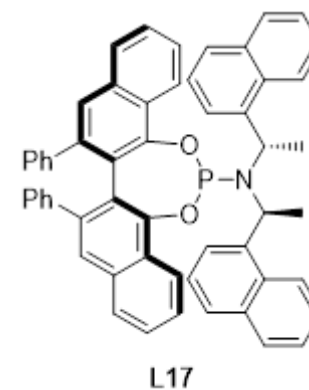

C:\Users\alice\Desktop\Chen ligand\L17\_carbon.als

DFILE L17\_carbon.als  
 COMNT  
 DATIM 2020-04-24 20:53:41  
 OBNUC <sup>13</sup>C  
 EXMOD carbon.jxp  
 OBFRQ 125.77 MHz  
 OBSET 7.87 KHz  
 OBFIN 4.21 Hz  
 POINT 26214  
 FREQU 31446.54 Hz  
 SCANS 4000  
 ACQTM 0.8336 sec  
 PD 2.0000 sec  
 PW1 3.40 usec  
 IRNUC <sup>1</sup>H  
 CTEMP 21.2 c  
 SLVNT CDCL<sub>3</sub>  
 EXREF 77.00 ppm  
 BF 0.12 Hz  
 RGAIN 60

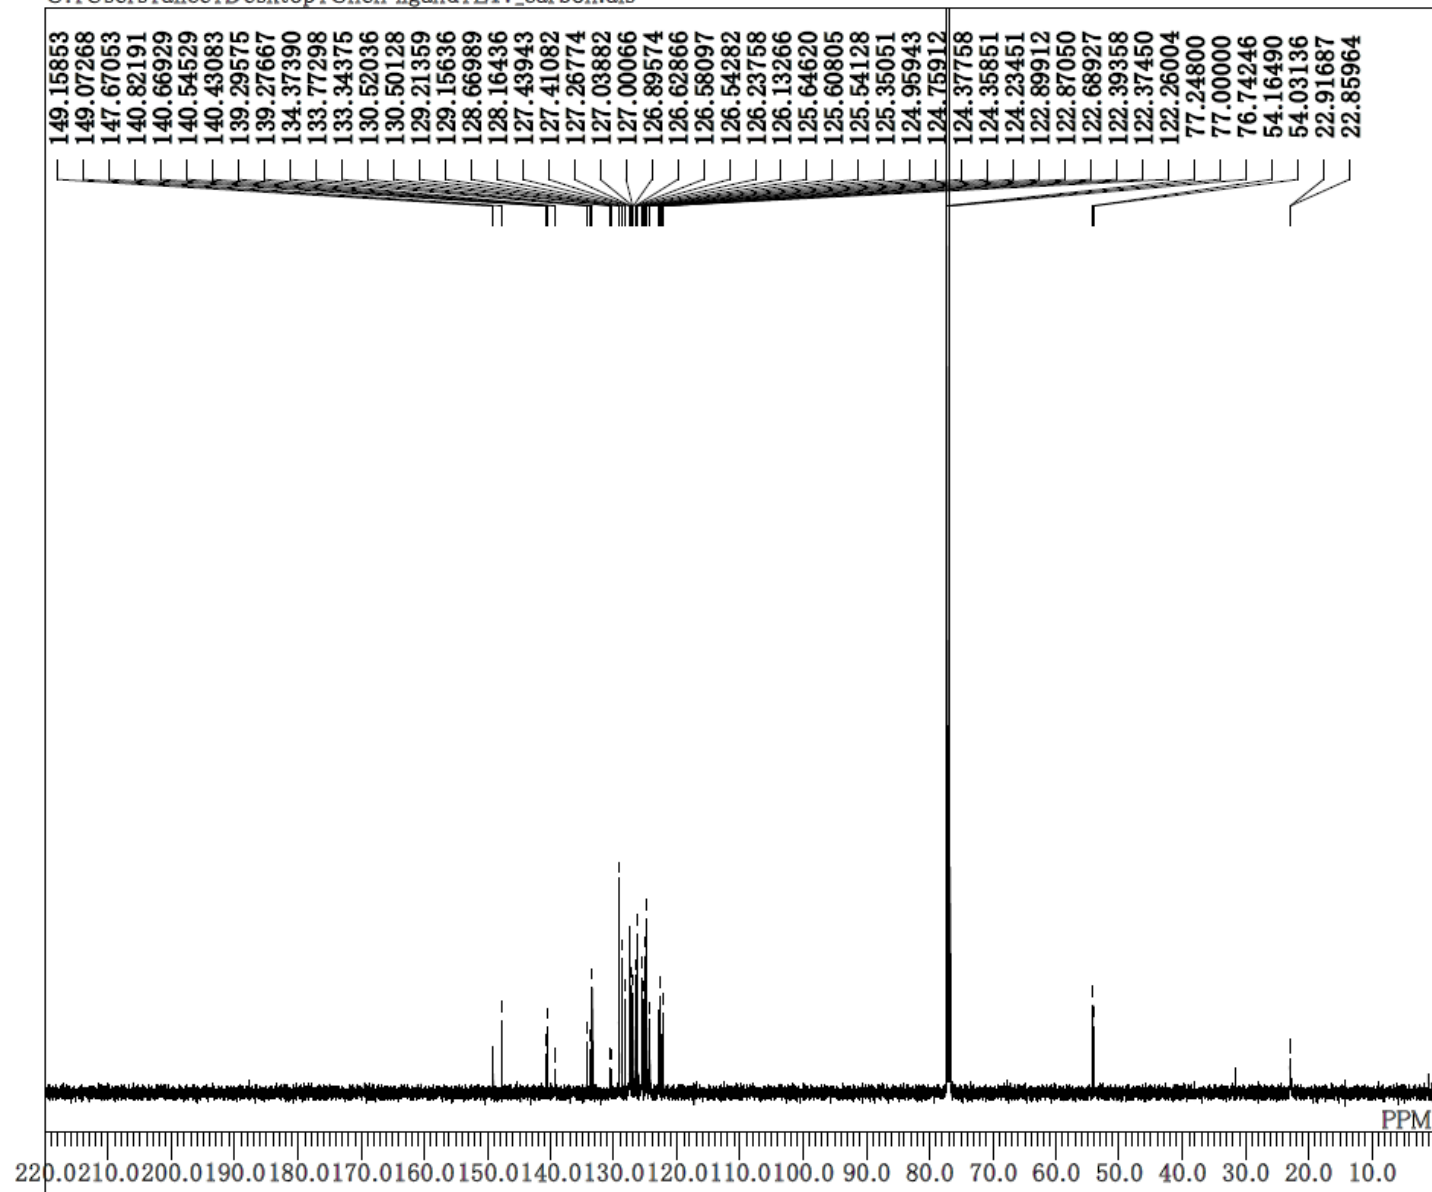

C:\Users\alice\Desktop\Chen ligand\L17\_P.als

DFILE L17\_P.als  
COMNT  
DATIM 09-05-2020 17:12:29  
OBNUC 31P  
EXMOD carbon.jxp  
OBFRQ 158.59 MHz  
OBSET 7.99 KHz  
OBFIN 9.23 Hz  
POINT 26214  
FREQU 64102.56 Hz  
SCANS 60  
ACQTM 0.0000 sec  
PD 2.0000 sec  
PW1 4.80 usec  
IRNUC 1H  
CTEMP 20.6 c  
SLVNT CDCL3  
EXREF -6.00 ppm  
BF 0.12 Hz  
RGAIN 56

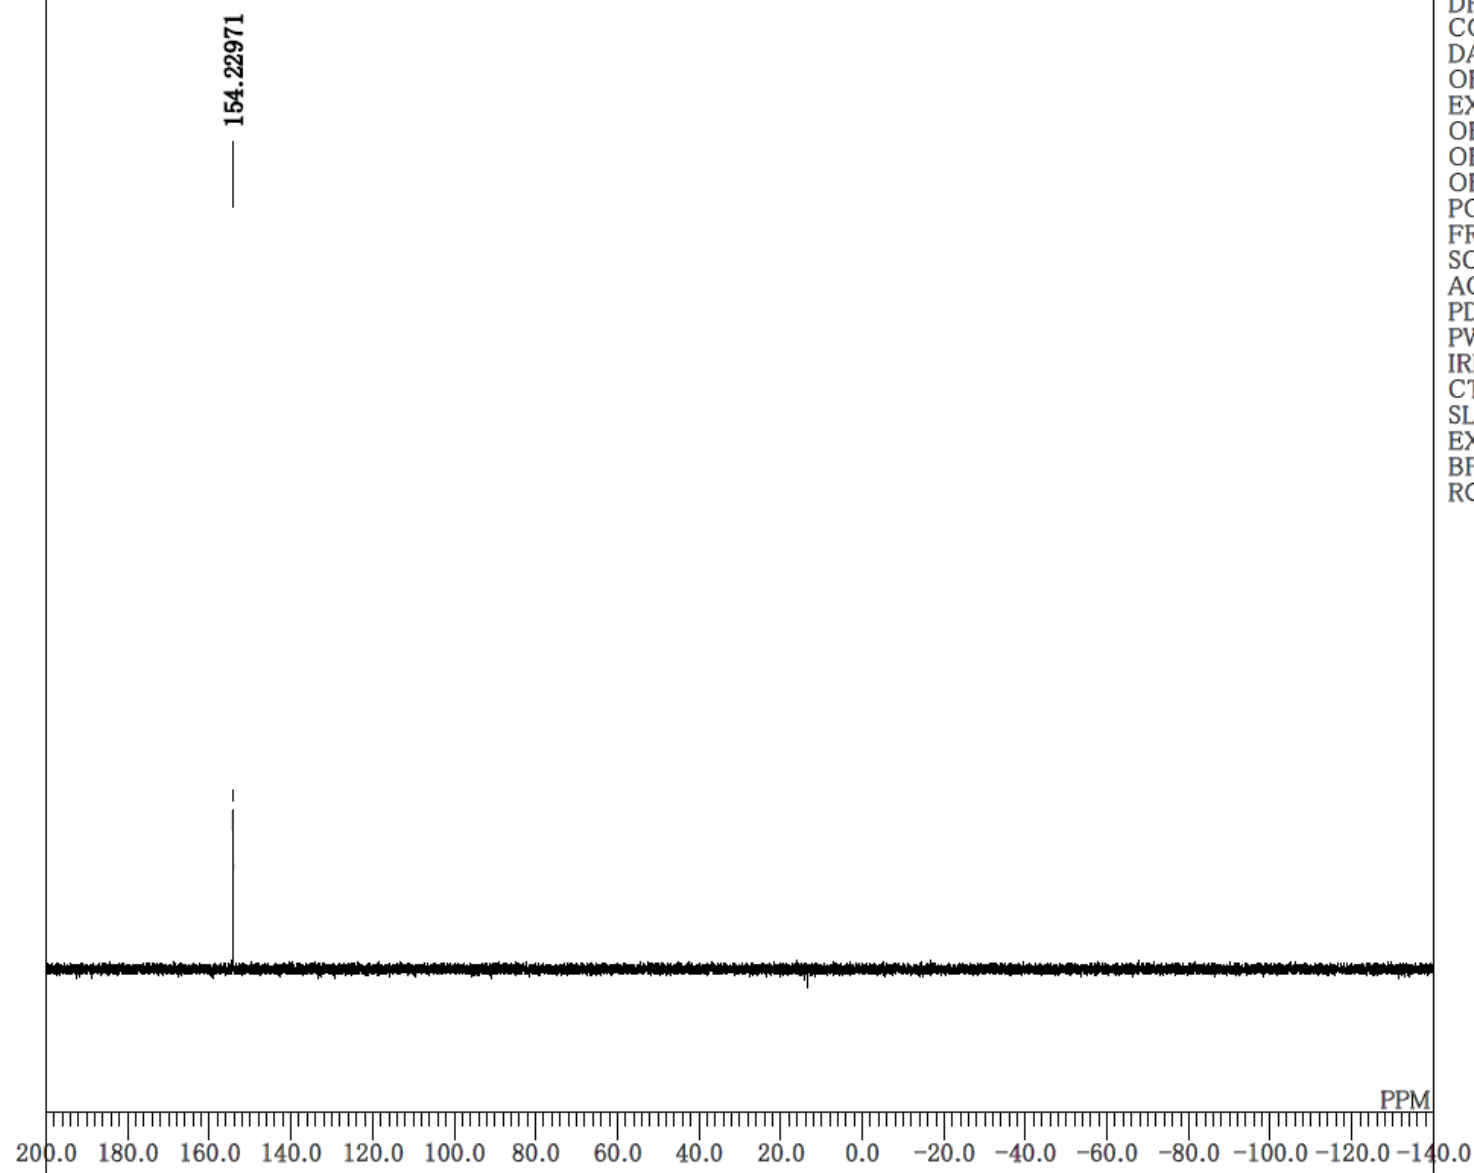

C:\Users\valice\Desktop\Chen ligand\amine\_proton.als

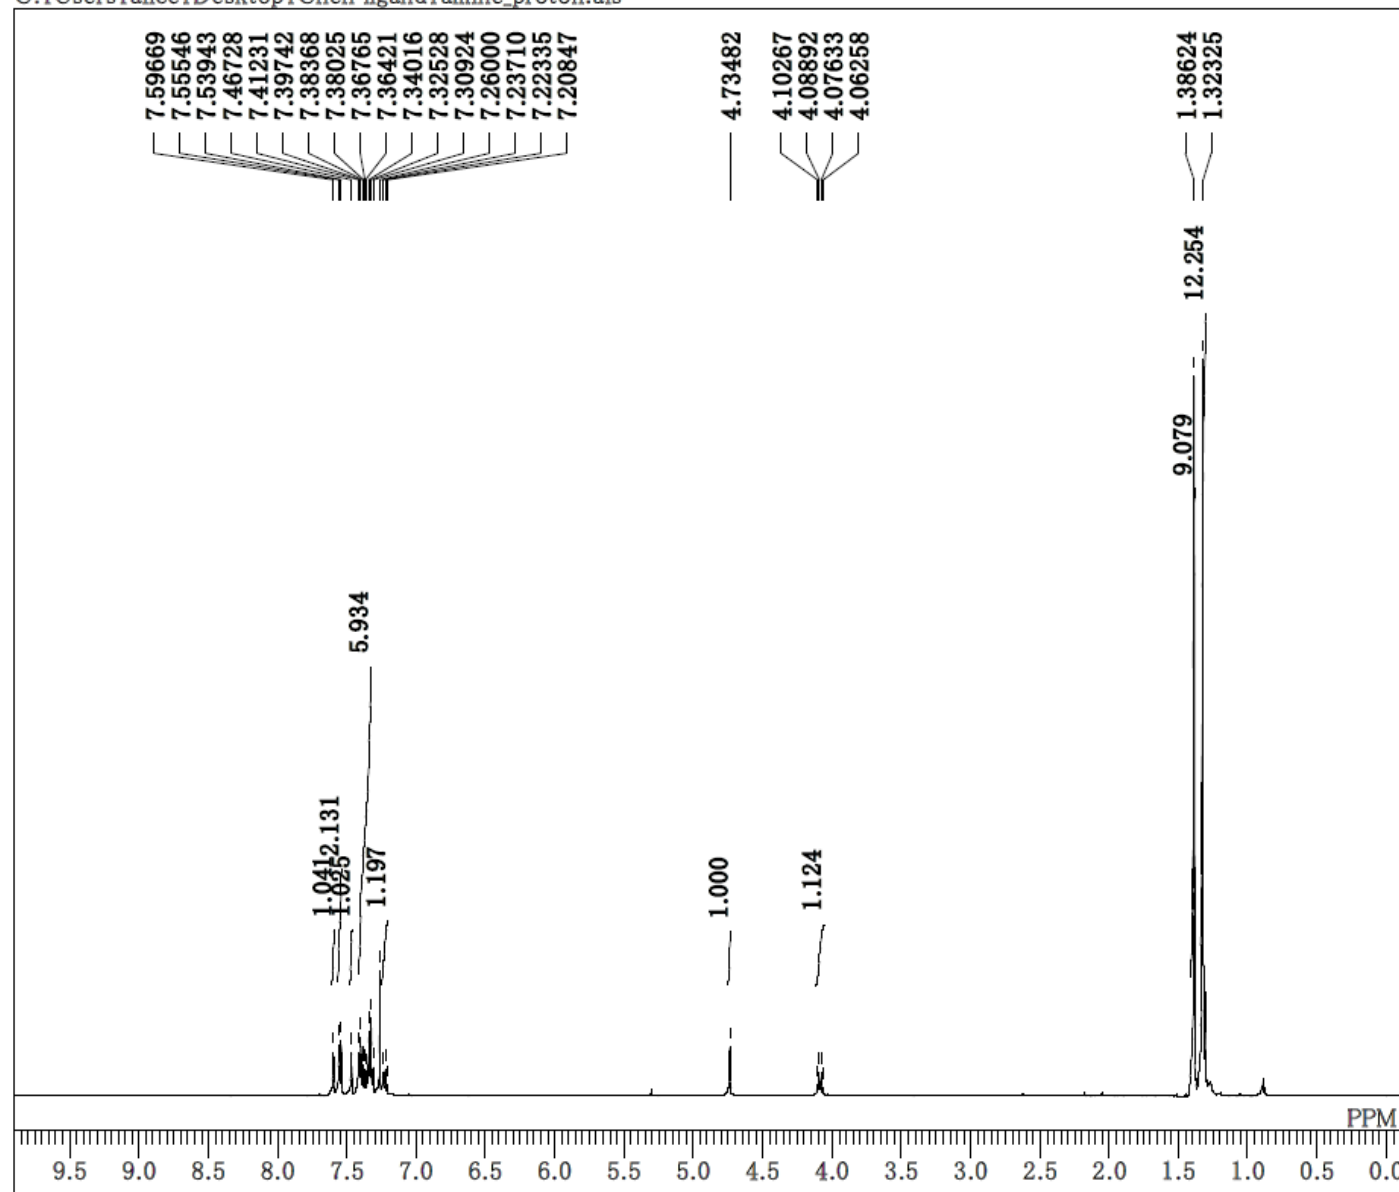

DFILE amine\_proton.als  
 COMNT  
 DATIM 2019-04-11 19:26:22  
 OBNUC 1H  
 EXMOD proton.jxp  
 OBFRQ 500.16 MHz  
 OBSET 2.41 KHz  
 OBFIN 6.01 Hz  
 POINT 13107  
 FREQU 7507.51 Hz  
 SCANS 8  
 ACQTM 1.7459 sec  
 PD 6.0000 sec  
 PW1 5.55 usec  
 IRNUC 1H  
 CTEMP 21.7 c  
 SLVNT CDCL3  
 EXREF 7.26 ppm  
 BF 0.12 Hz  
 RGAIN 38

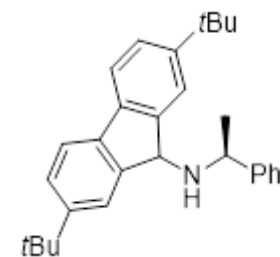

C:\Users\alice\Desktop\Chen ligand\amine\_carbon.als

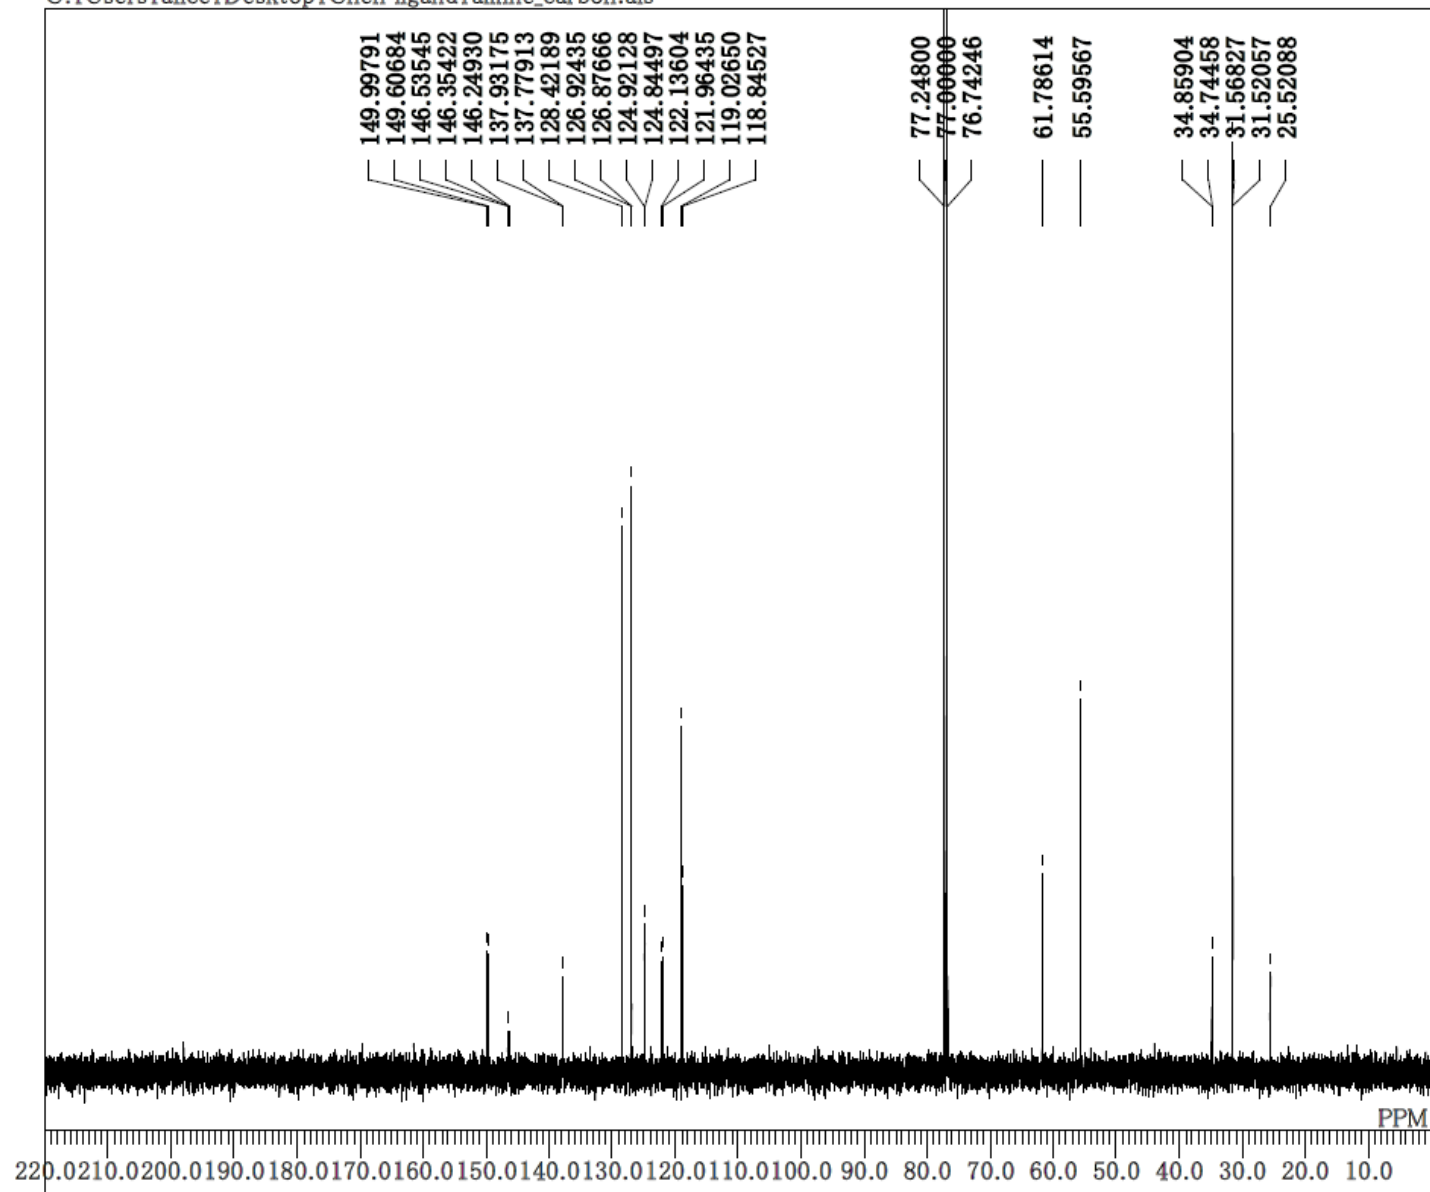

DFILE amine\_carbon.als  
 COMNT  
 DATIM 2019-07-18 10:41:38  
 OBNUC 13C  
 EXMOD carbon.jpg  
 OBFRQ 125.77 MHz  
 OBSET 7.87 KHz  
 OBFIN 4.21 Hz  
 POINT 26214  
 FREQU 31446.54 Hz  
 SCANS 121  
 ACQTM 0.8336 sec  
 PD 2.0000 sec  
 PW1 3.40 usec  
 IRNUC 1H  
 CTEMP 22.1 c  
 SLVNT CDCL3  
 EXREF 77.00 ppm  
 BF 0.12 Hz  
 RGAIN 60

C:\Users\valice\Desktop\Chen ligand\L18\_proton.als

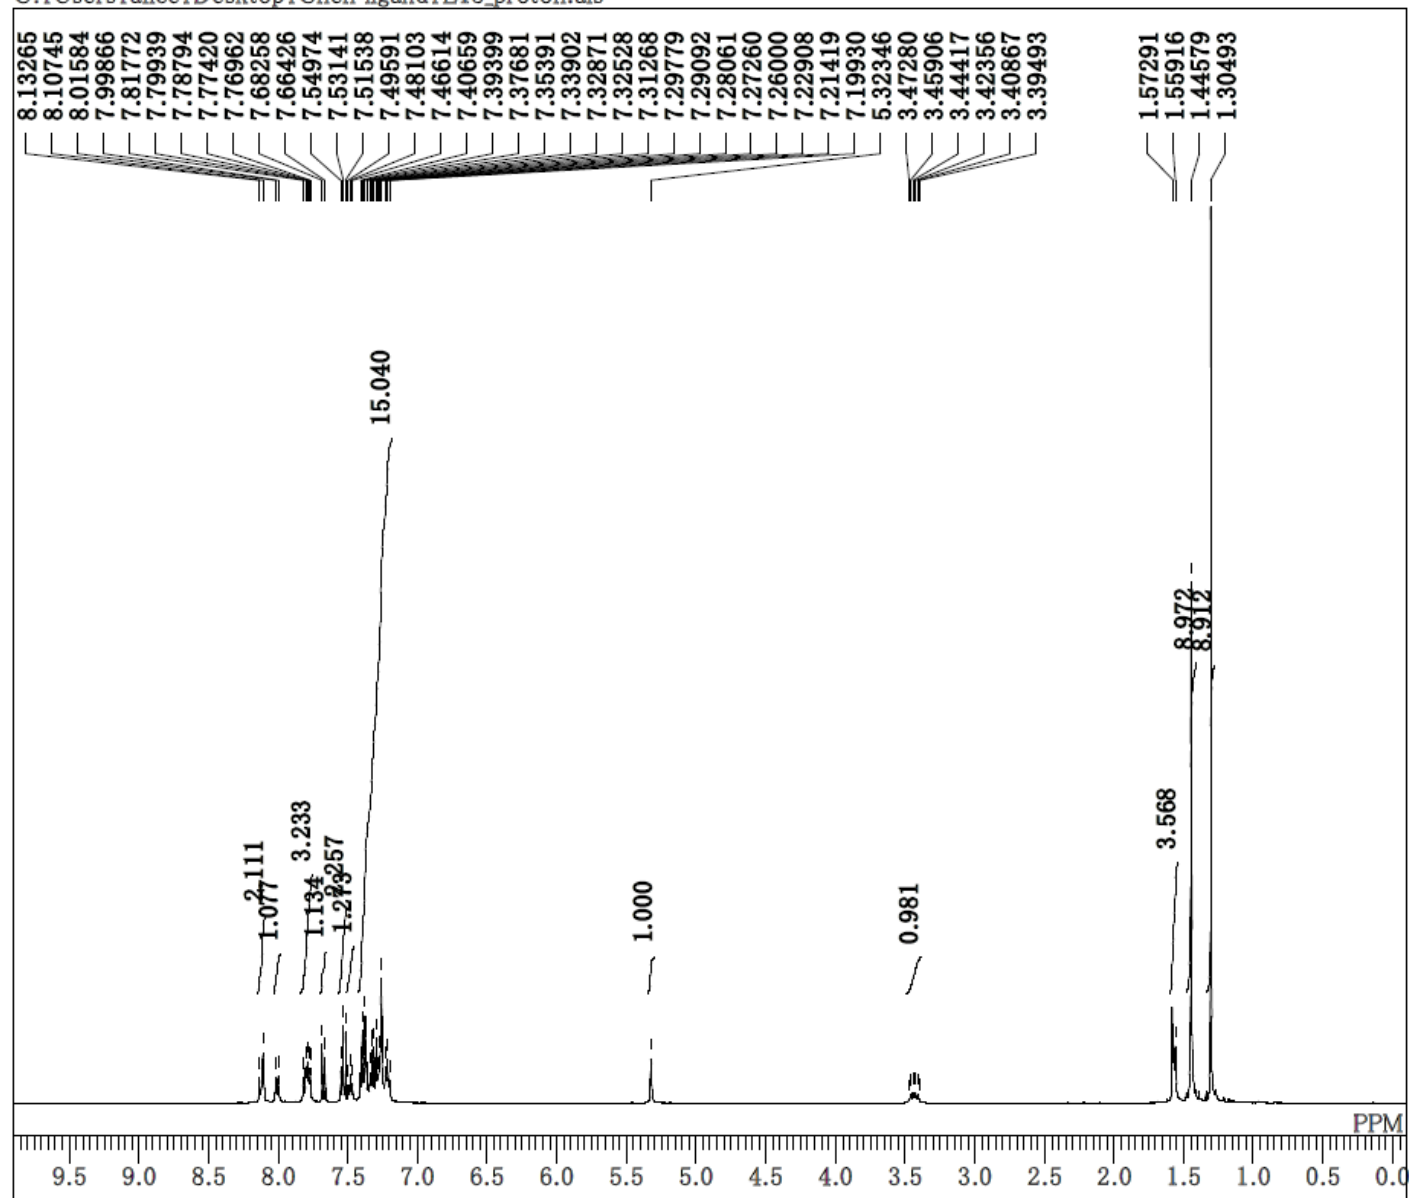

DFILE L18\_proton.als  
 COMNT  
 DATIM 2020-04-19 20:52:29  
 OBNUC <sup>1</sup>H  
 EXMOD proton.jxp  
 OBFRQ 500.16 MHz  
 OBSET 2.41 KHz  
 OBFIN 6.01 Hz  
 POINT 13107  
 FREQU 7507.51 Hz  
 SCANS 8  
 ACQTM 1.7459 sec  
 PD 6.0000 sec  
 PW1 5.55 usec  
 IRNUC <sup>1</sup>H  
 CTEMP 21.2 c  
 SLVNT CDCL3  
 EXREF 7.26 ppm  
 BF 0.12 Hz  
 RGAIN 36

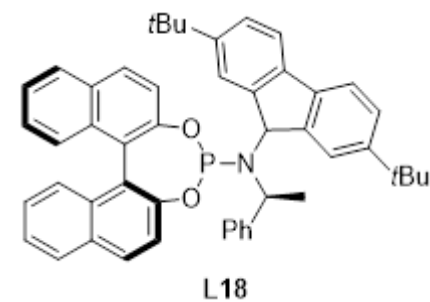

C:\Users\valice\Desktop\Chen ligand\L18\_carbon.als

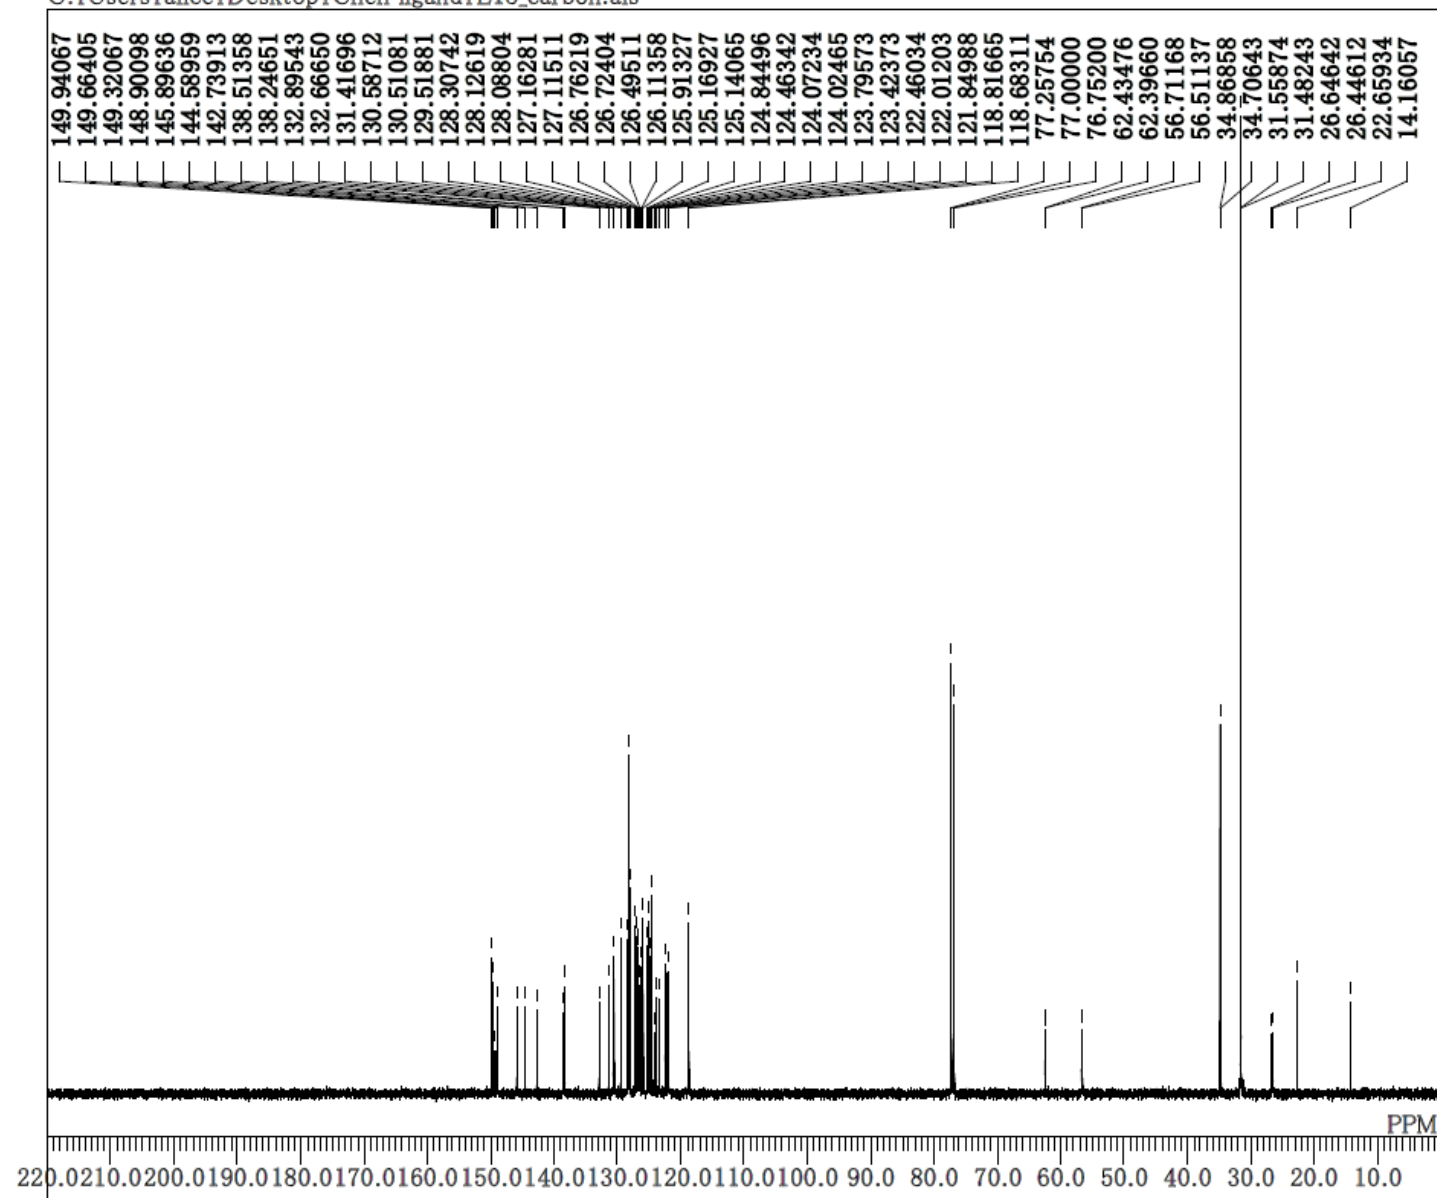

DFILE L18\_carbon.als  
 COMNT  
 DATIM 2020-04-18 21:35:18  
 OBNUC <sup>13</sup>C  
 EXMOD carbon.jxp  
 OBFRQ 125.77 MHz  
 OBSET 7.87 KHz  
 OBFIN 4.21 Hz  
 POINT 26214  
 FREQU 31446.54 Hz  
 SCANS 221  
 ACQTM 0.8336 sec  
 PD 2.0000 sec  
 PW1 3.40 usec  
 IRNUC <sup>1</sup>H  
 CTEMP 21.6 c  
 SLVNT CDCL<sub>3</sub>  
 EXREF 77.00 ppm  
 BF 0.12 Hz  
 RGAIN 60



C:\Users\alice\Desktop\Chen ligand\L18\_P.als

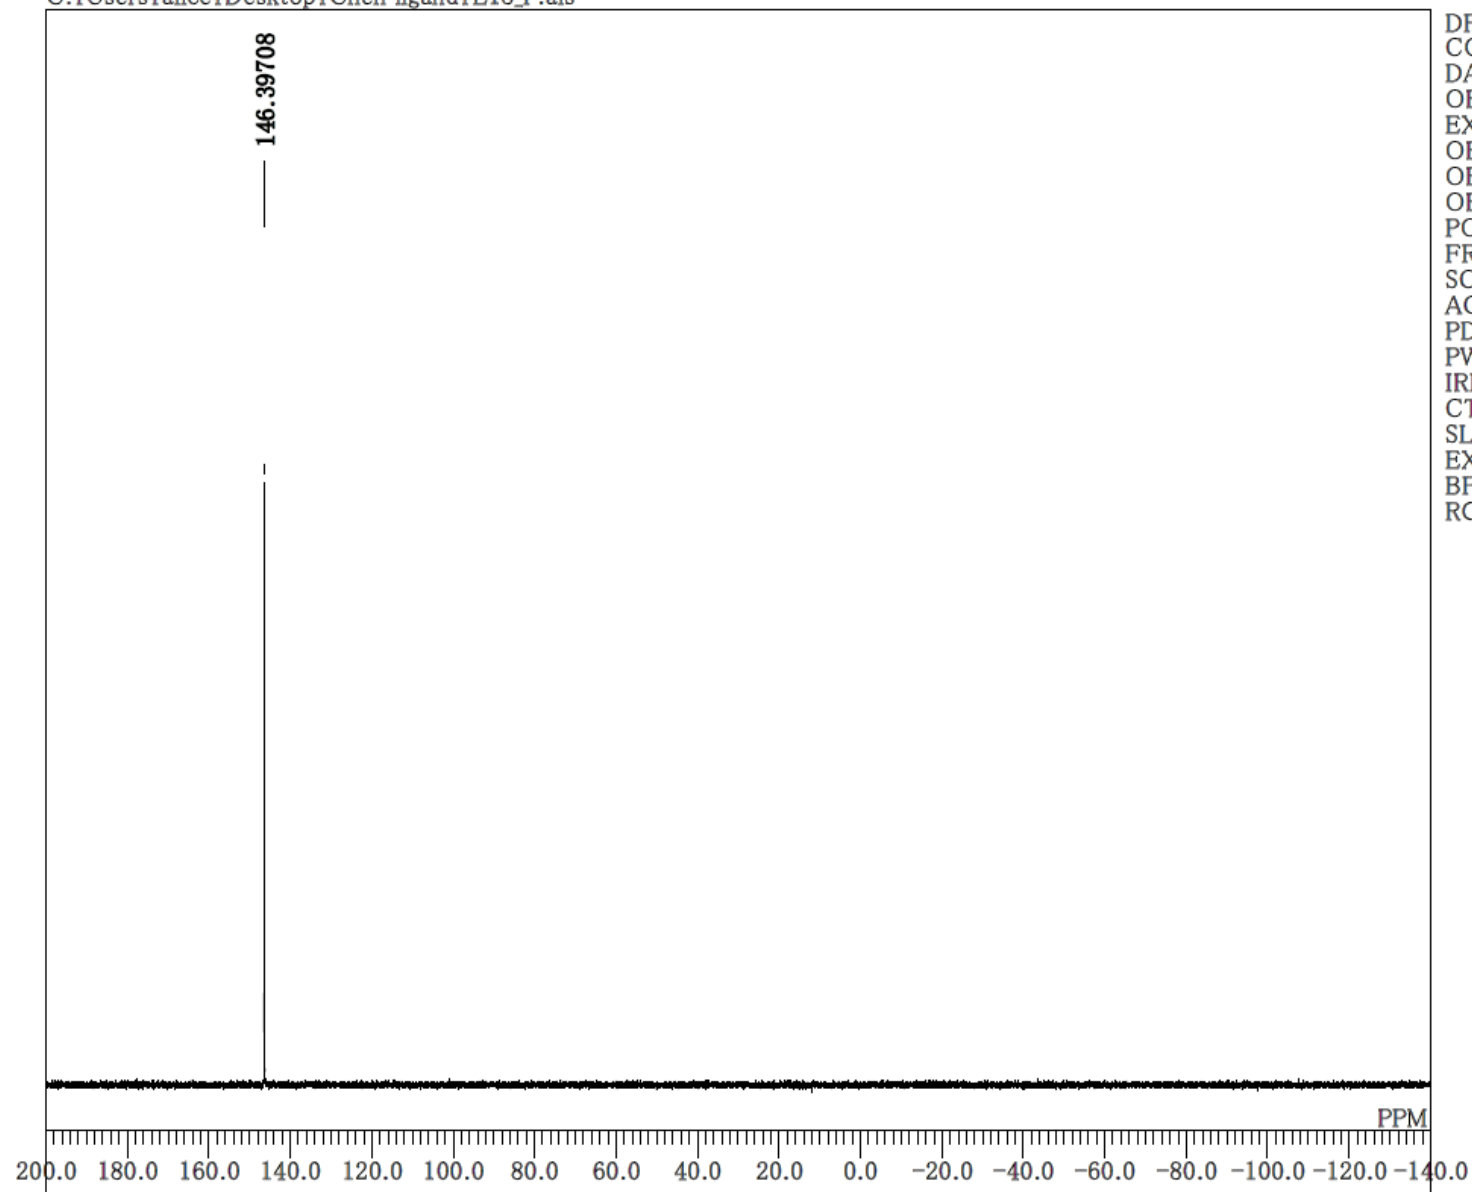

DFILE L18\_P.als  
COMNT  
DATIM 07-05-2020 23:03:08  
OBNUC 31P  
EXMOD carbon.jxp  
OBFRQ 158.59 MHz  
OBSET 7.99 KHz  
OBFIN 9.23 Hz  
POINT 26214  
FREQU 64102.56 Hz  
SCANS 100  
ACQTM 0.4089 sec  
PD 2.0000 sec  
PW1 4.80 usec  
IRNUC 1H  
CTEMP 20.7 c  
SLVNT CDCL3  
EXREF -6.00 ppm  
BF 0.12 Hz  
RGAIN 56

C:\Users\Valice\Desktop\Gousei\Chen\Chen\_SM2\SSS-3a\_proton.als

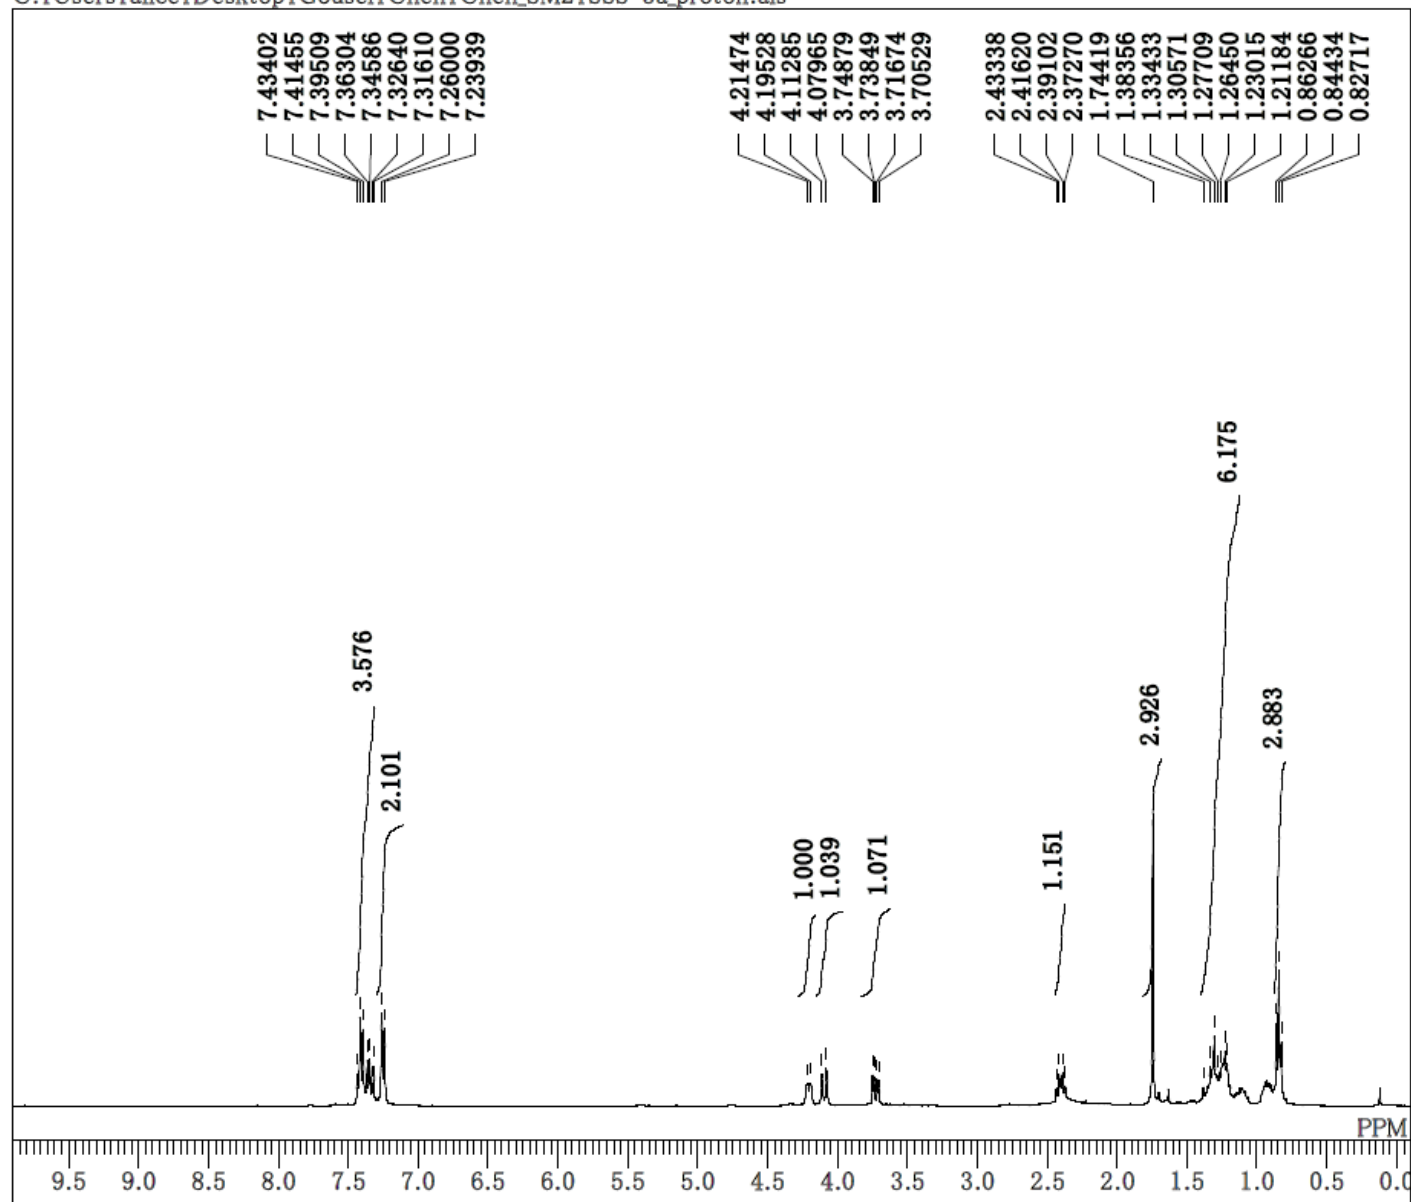

DFILE SSS-3a\_proton.als  
 COMNT  
 DATIM 15-10-2020 19:38:13  
 OBNUC 1H  
 EXMOD proton.jxp  
 OBFRQ 391.78 MHz  
 OBSET 8.51 KHz  
 OBFIN 3.34 Hz  
 POINT 13107  
 FREQU 5878.90 Hz  
 SCANS 8  
 ACQTM 2.2295 sec  
 PD 6.0000 sec  
 PW1 5.17 usec  
 IRNUC 1H  
 CTEMP 20.9 c  
 SLVNT CDCL3  
 EXREF 7.26 ppm  
 BF 0.12 Hz  
 RGAIN 30

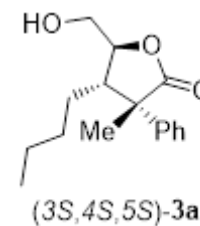

C:\Users\Valice\Desktop\Gousei\Chen\Chen\_SM2\SSS-3a\_carbon.als

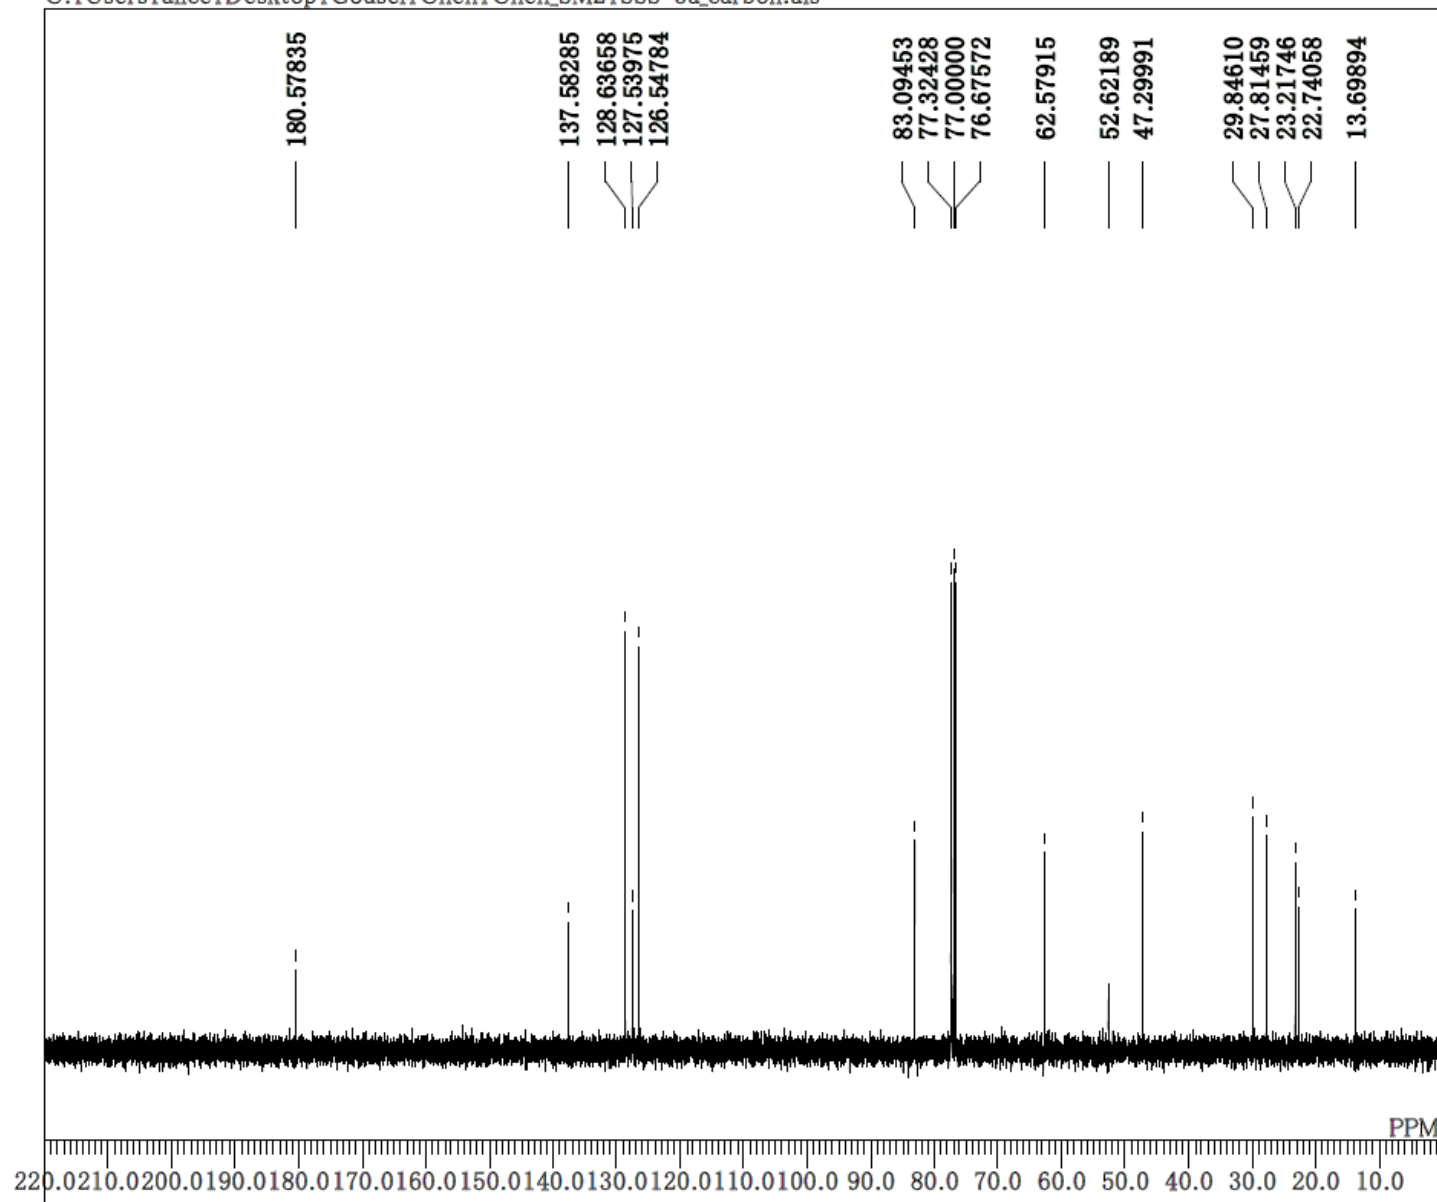

DFILE SSS-3a\_carbon.als  
 COMNT  
 DATIM 15-10-2020 19:41:02  
 OBNUC <sup>13</sup>C  
 EXMOD carbon.jxp  
 OBFRQ 98.52 MHz  
 OBSET 4.64 KHz  
 OBFIN 8.74 Hz  
 POINT 26214  
 FREQU 24630.54 Hz  
 SCANS 72  
 ACQTM 1.0643 sec  
 PD 2.0000 sec  
 PW1 3.12 usec  
 IRNUC <sup>1</sup>H  
 CTEMP 21.1 c  
 SLVNT CDCL<sub>3</sub>  
 EXREF 77.00 ppm  
 BF 0.12 Hz  
 RGAIN 60

C:\Users\valice\Desktop\Gousei\Chen\Chen\_SM2\SSR-3a\_proton.als

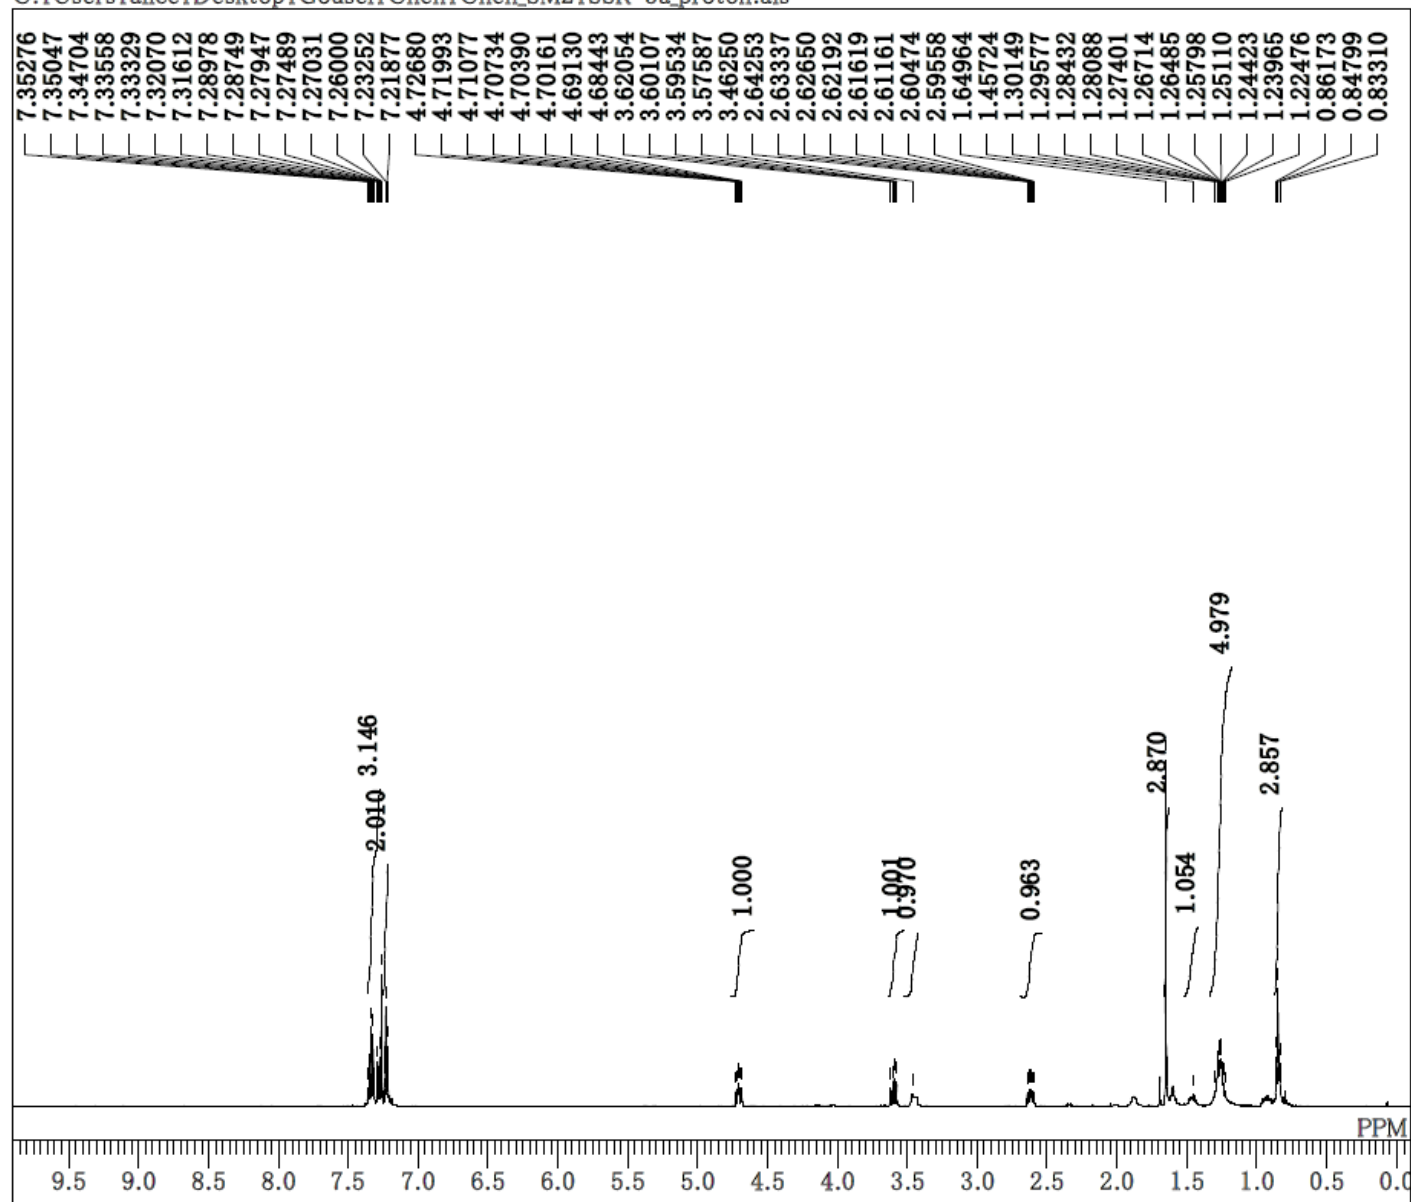

DFILE SSR-3a\_proton.als  
 COMNT  
 DATIM 2020-10-28 18:40:32  
 OBNUC 1H  
 EXMOD proton.jxp  
 OBFRQ 500.16 MHz  
 OBSET 2.41 KHz  
 OBFIN 6.01 Hz  
 POINT 13107  
 FREQU 7507.51 Hz  
 SCANS 8  
 ACQTM 1.7459 sec  
 PD 6.0000 sec  
 PW1 5.55 usec  
 IRNUC 1H  
 CTEMP 21.6 c  
 SLVNT CDCL3  
 EXREF 7.26 ppm  
 BF 0.12 Hz  
 RGAIN 40

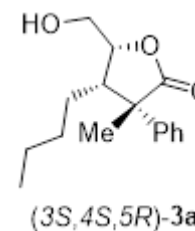

C:\Users\alice\Desktop\Gousei\Chen\Chen\_SM2\SSS-3a\_carbon.als

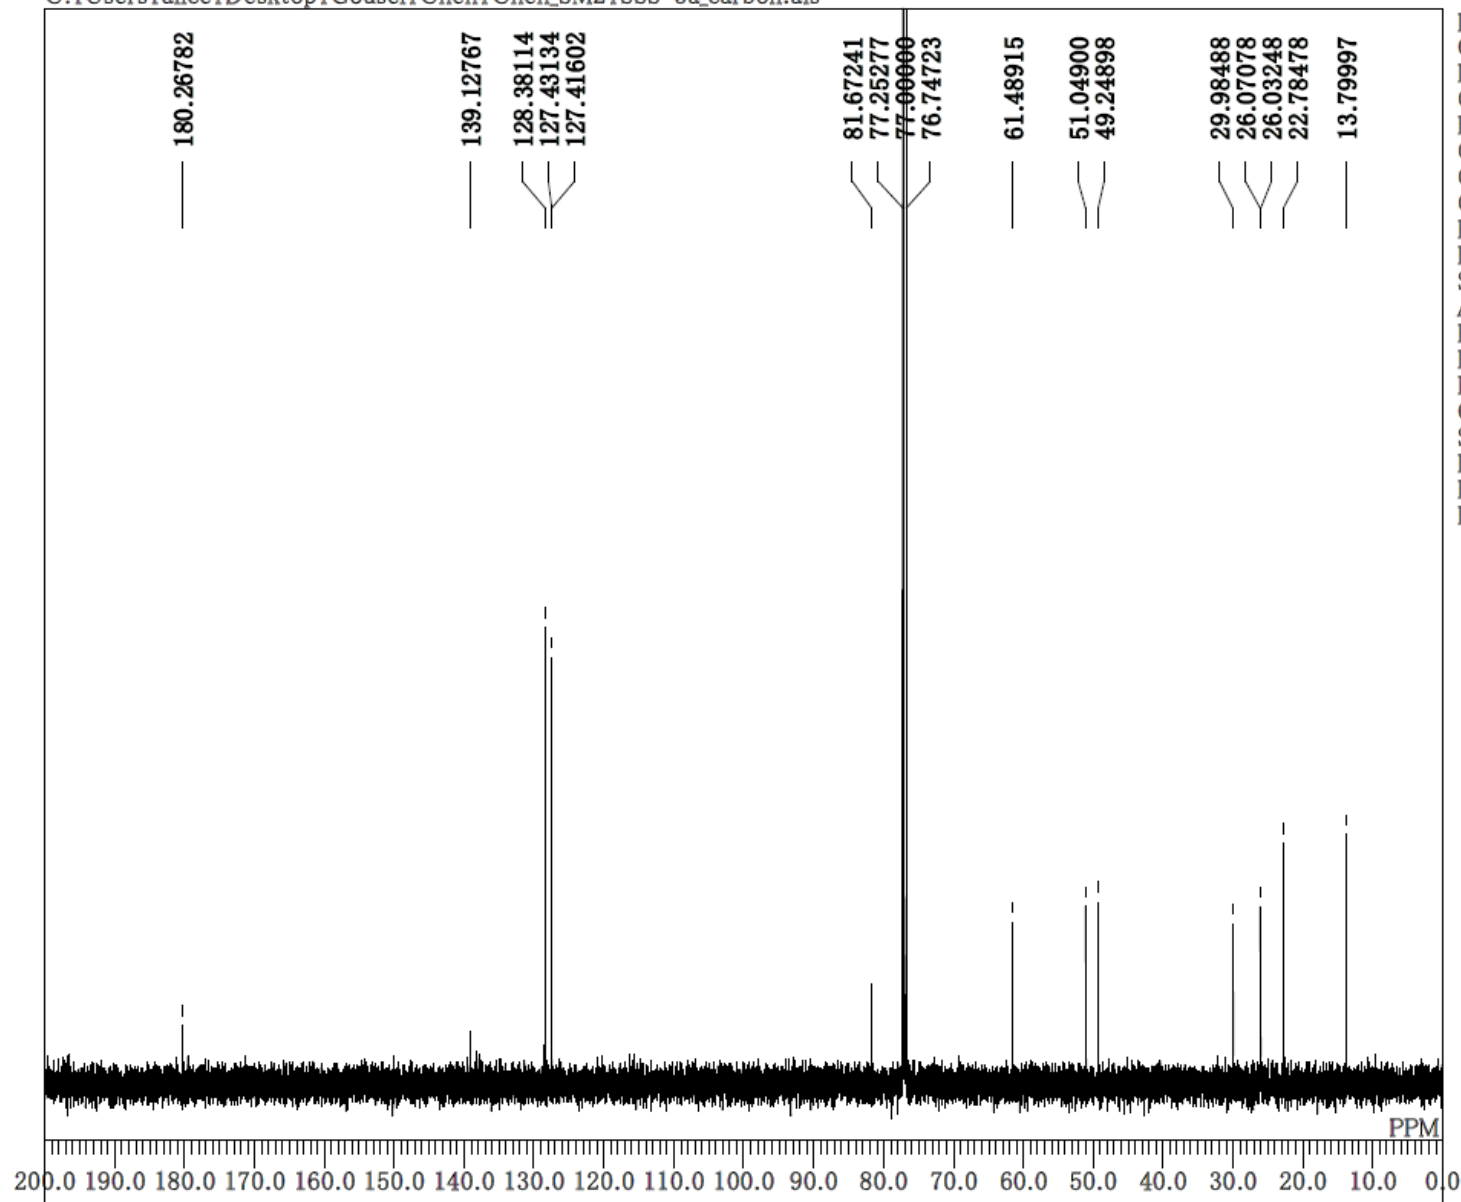

SSS-3a\_carbon.als

2020-10-28 18:50:15

13C

carbon.jxp

125.77 MHz

7.87 KHz

4.21 Hz

26214

25252.53 Hz

264

1.0381 sec

2.0000 sec

3.40 usec

1H

22.3 c

CDCL3

77.00 ppm

0.12 Hz

60

C:\Users\Valice\Desktop\Gousei\Chen\Chen\_SM2\RSS-3a\_proton.als

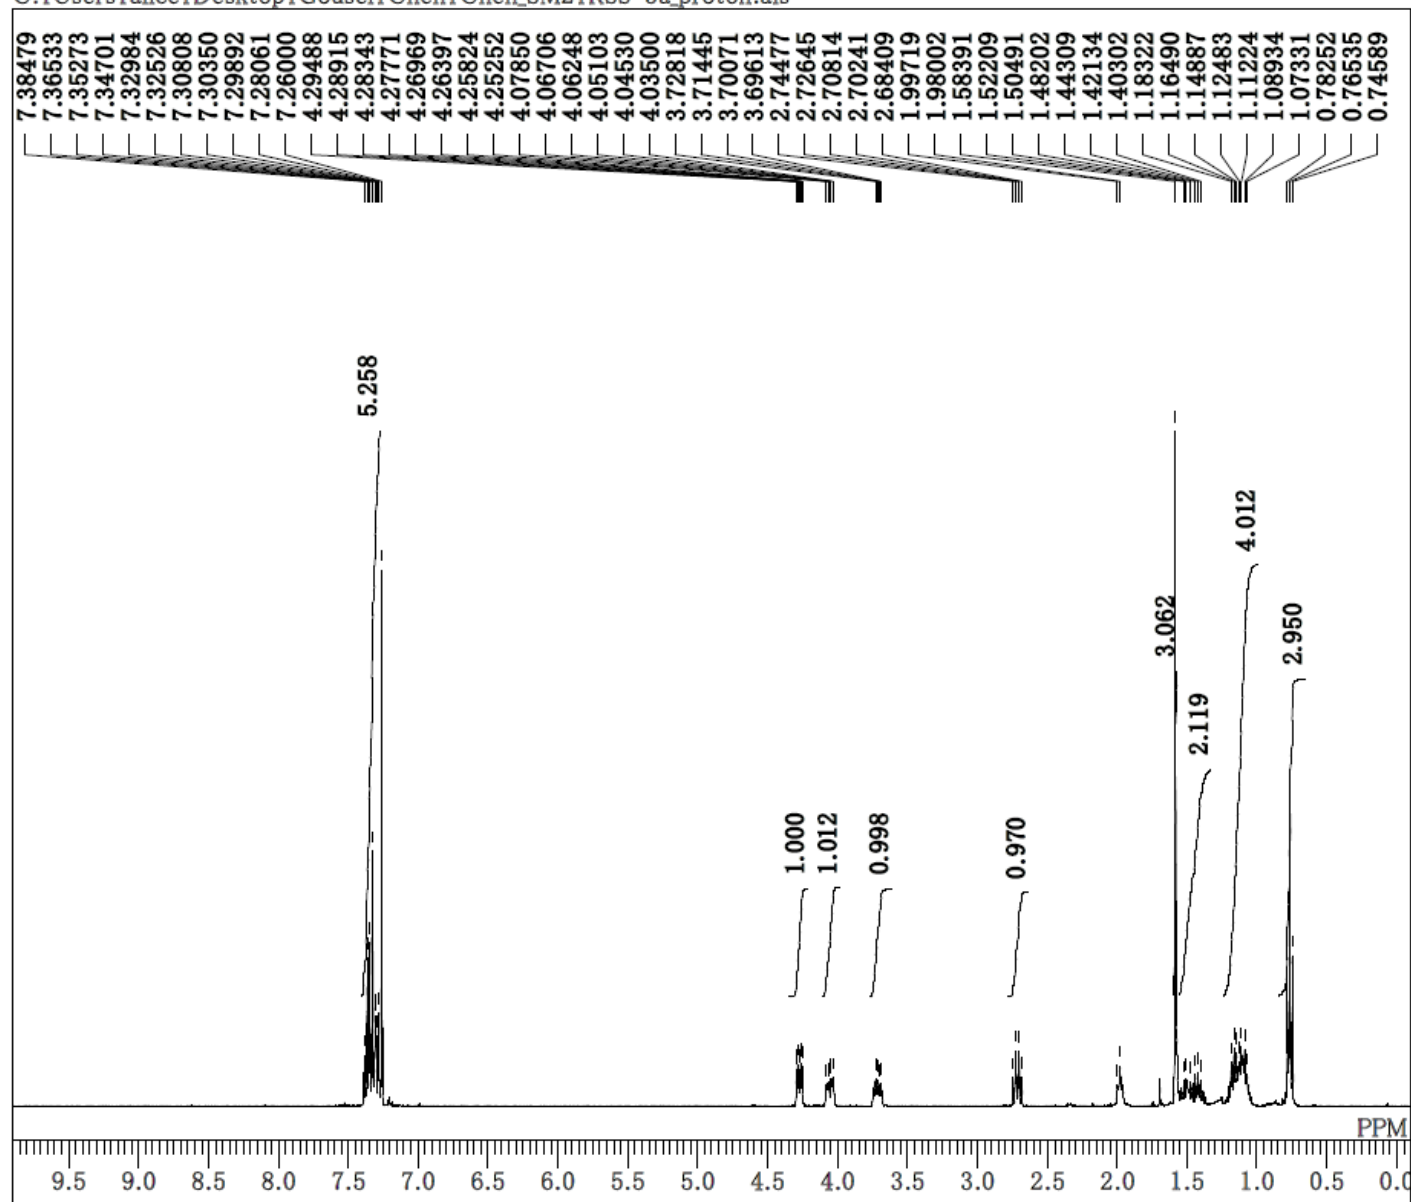

DFILE  
 COMNT  
 DATIM  
 OBNUC  
 EXMOD  
 OBFRQ  
 OBSET  
 OBFIN  
 POINT  
 FREQU  
 SCANS  
 ACQTM  
 PD  
 PW1  
 IRNUC  
 CTEMP  
 SLVNT  
 EXREF  
 BF  
 RGAIN

RSS-3a\_proton.als  
 16-10-2020 22:19:34  
 1H  
 proton.jxp  
 391.78 MHz  
 8.51 KHz  
 3.34 Hz  
 13107  
 5878.90 Hz  
 8  
 2.2295 sec  
 6.0000 sec  
 5.17 usec  
 1H  
 20.9 c  
 CDCL3  
 7.26 ppm  
 0.12 Hz  
 46

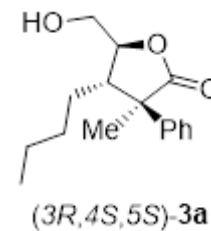

C:\Users\Valice\Desktop\Gousei\Chen\Chen\_SM2\RSS-3a\_carbon.als

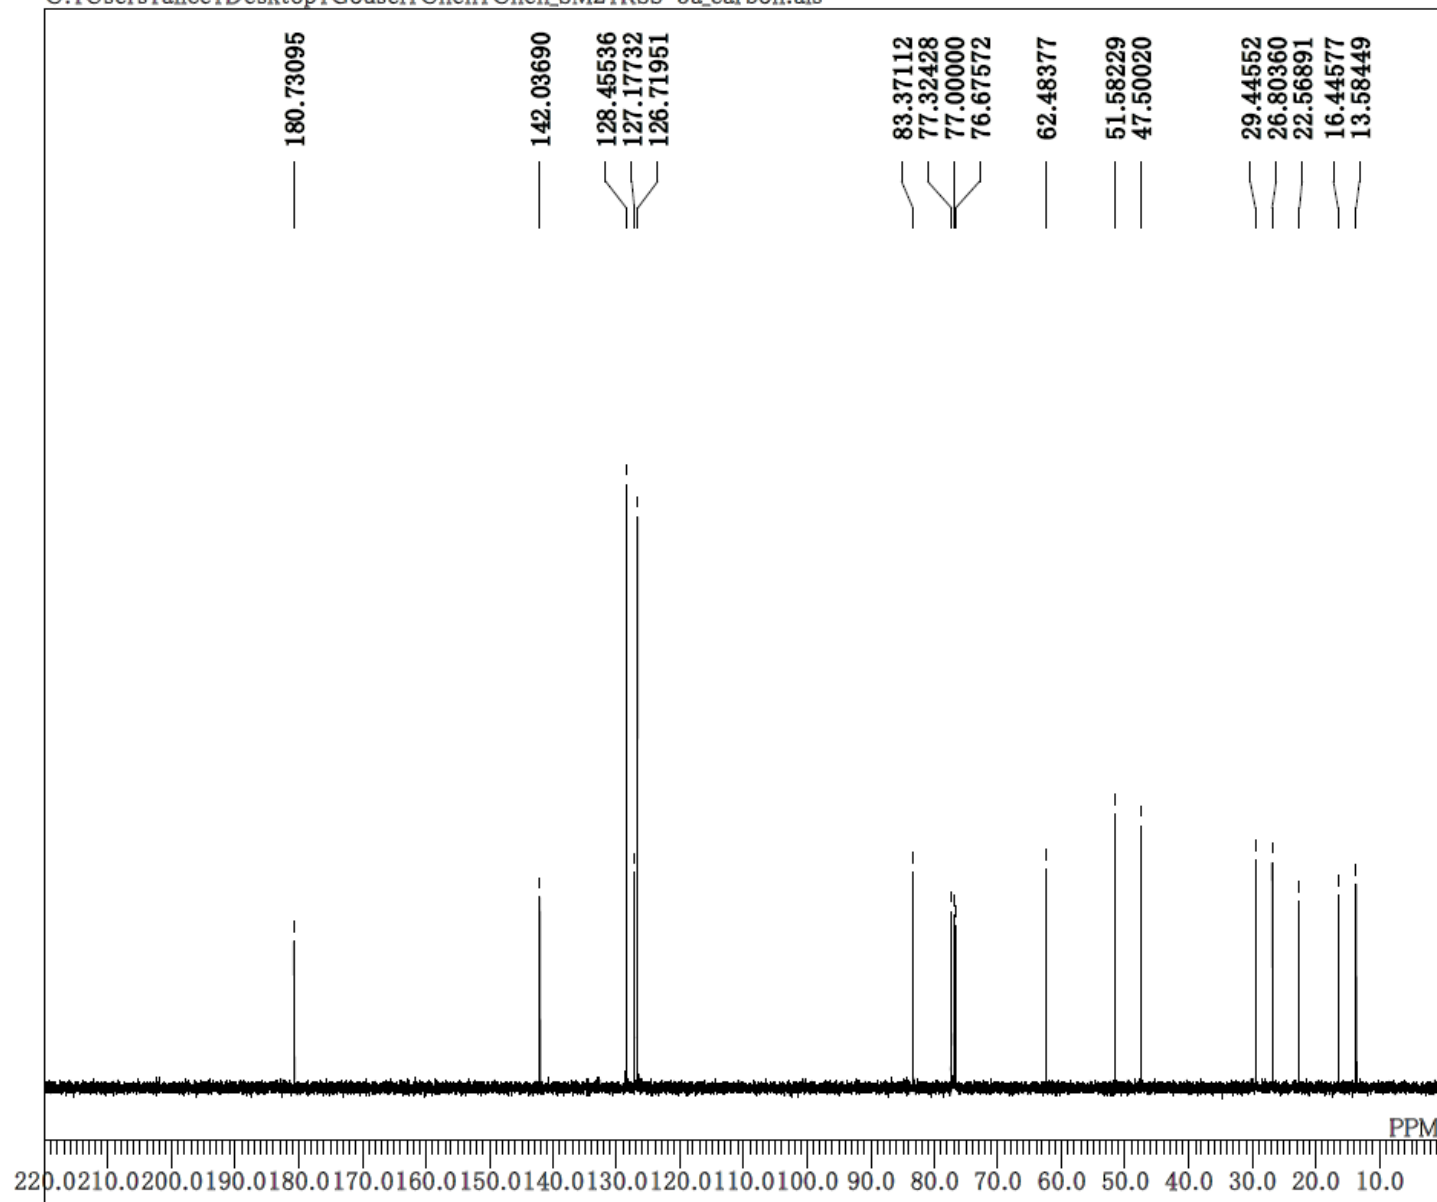

|       |                     |
|-------|---------------------|
| DFILE | RSS-3a_carbon.als   |
| COMNT |                     |
| DATIM | 16-10-2020 22:27:08 |
| OBNUC | <sup>13</sup> C     |
| EXMOD | carbon.jxp          |
| OBFRQ | 98.52 MHz           |
| OBSET | 4.64 KHz            |
| OBFIN | 8.74 Hz             |
| POINT | 26214               |
| FREQU | 24630.54 Hz         |
| SCANS | 48                  |
| ACQTM | 1.0643 sec          |
| PD    | 2.0000 sec          |
| PW1   | 3.12 usec           |
| IRNUC | <sup>1</sup> H      |
| CTEMP | 21.1 c              |
| SLVNT | CDCL <sub>3</sub>   |
| EXREF | 77.00 ppm           |
| BF    | 0.12 Hz             |
| RGAIN | 60                  |

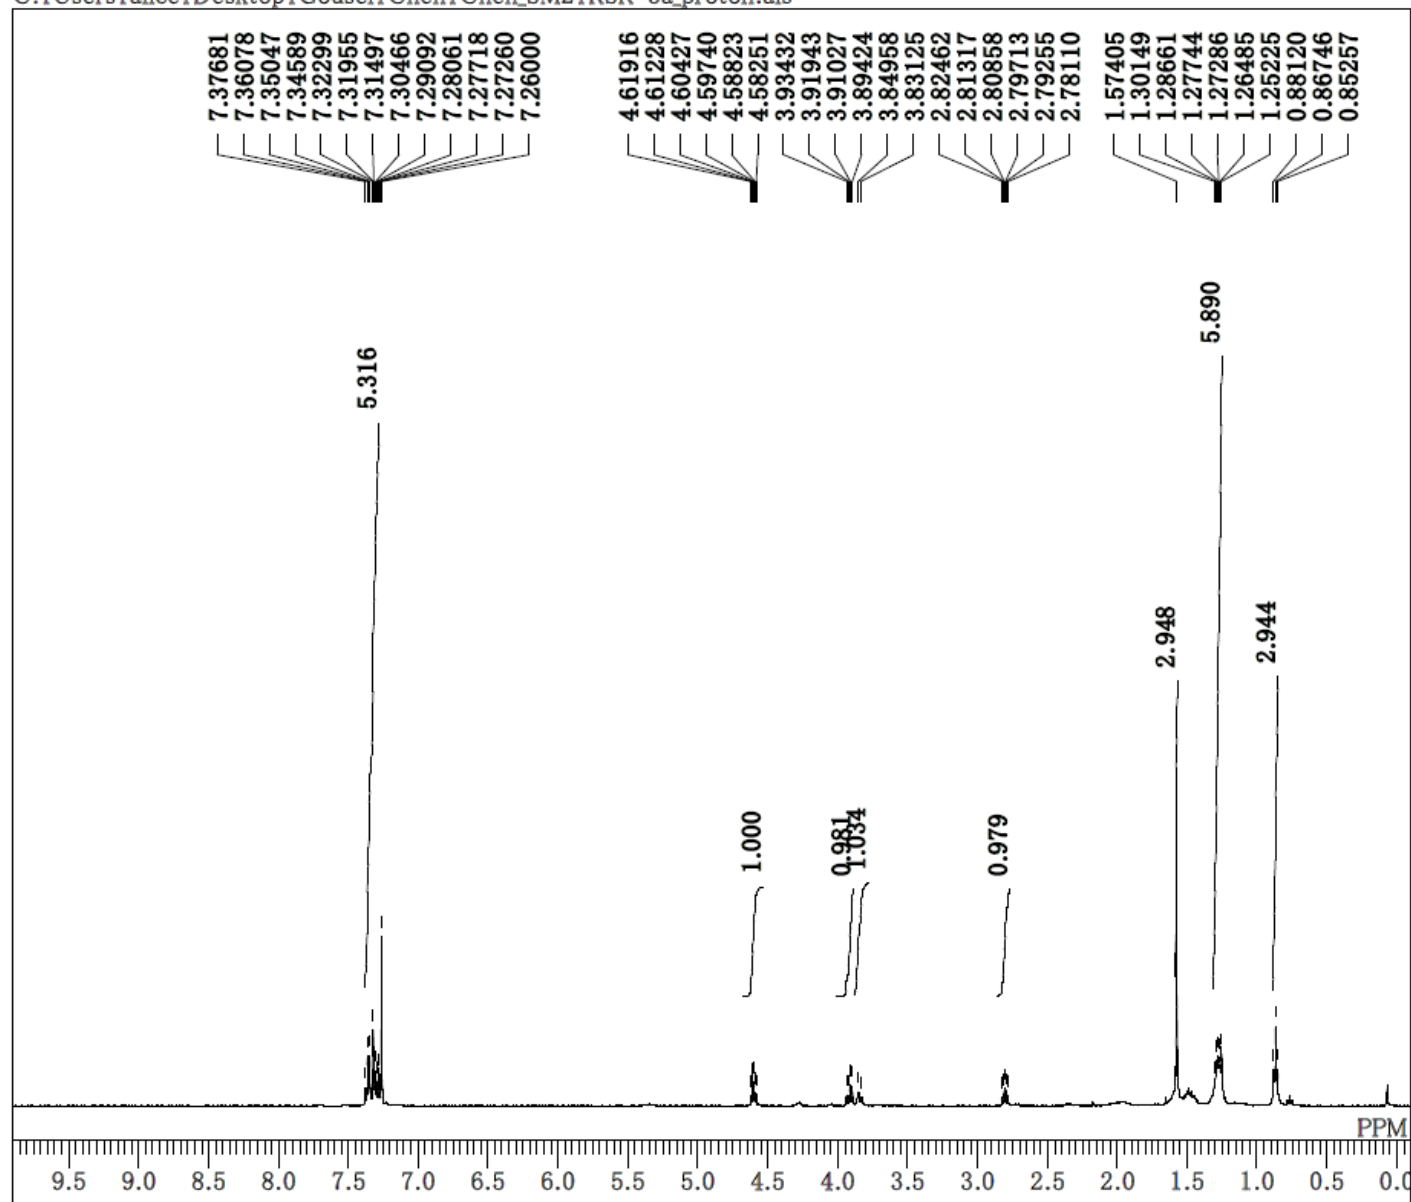

DFILE RSR-3a\_proton.als  
 COMNT  
 DATIM 2020-11-06 18:15:40  
 OBNUC 1H  
 EXMOD proton.jxp  
 OBFRQ 500.16 MHz  
 OBSET 2.41 KHz  
 OBFIN 6.01 Hz  
 POINT 13107  
 FREQU 7507.51 Hz  
 SCANS 8  
 ACQTM 1.7459 sec  
 PD 6.0000 sec  
 PW1 5.55 usec  
 IRNUC 1H  
 CTEMP 21.7 c  
 SLVNT CDCL3  
 EXREF 7.26 ppm  
 BF 0.12 Hz  
 RGAIN 42

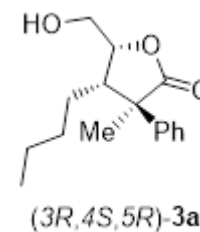



C:\Users\alice\Desktop\Gousei\Chen\Chen\_SM2\RSR-3a\_carbon.als

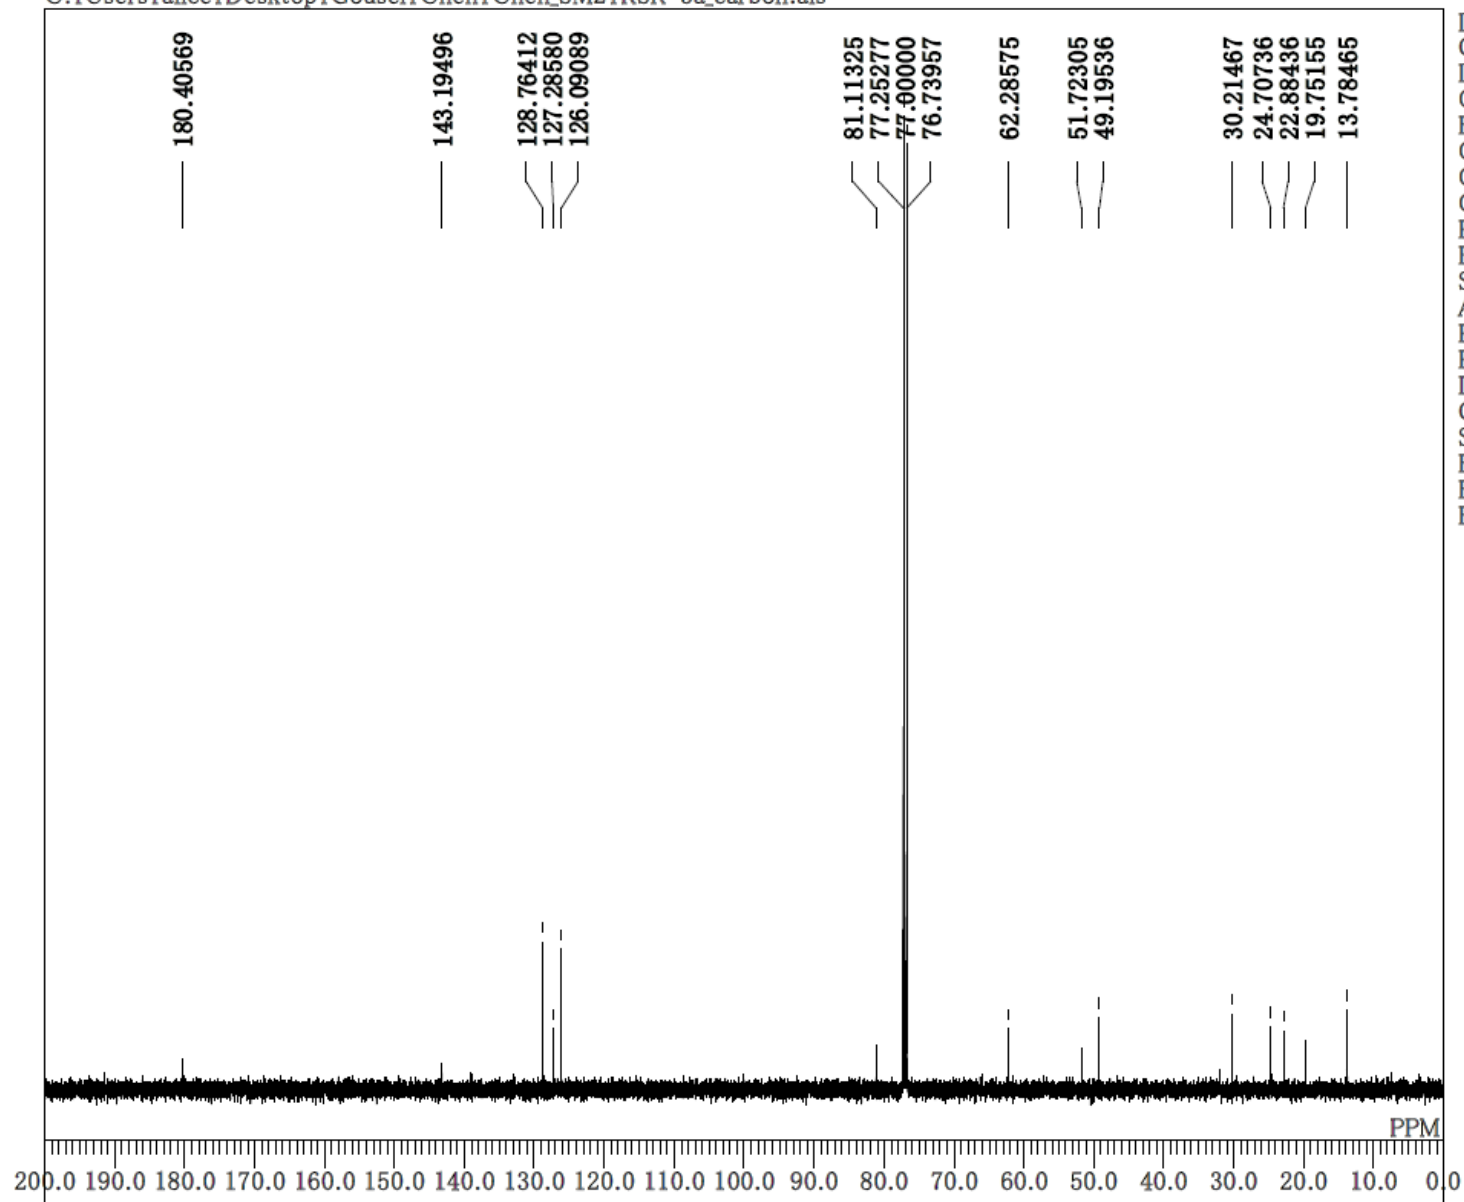

RSR-3a\_carbon.als

|       |                     |
|-------|---------------------|
| DFILE | carbon.jxp          |
| COMNT |                     |
| DATIM | 2020-11-07 09:50:45 |
| OBNUC | 13C                 |
| EXMOD |                     |
| OBFRQ | 125.77 MHz          |
| OBSET | 7.87 KHz            |
| OBFIN | 4.21 Hz             |
| POINT | 26214               |
| FREQU | 25252.53 Hz         |
| SCANS | 492                 |
| ACQTM | 1.0381 sec          |
| PD    | 2.0000 sec          |
| PW1   | 3.40 usec           |
| IRNUC | 1H                  |
| CTEMP | 22.3 c              |
| SLVNT | CDCL3               |
| EXREF | 77.00 ppm           |
| BF    | 0.12 Hz             |
| RGAIN | 60                  |

C:\Users\Valice\Desktop\Gousei\Chen\revise\Chen\_511\_proton-1-1.als

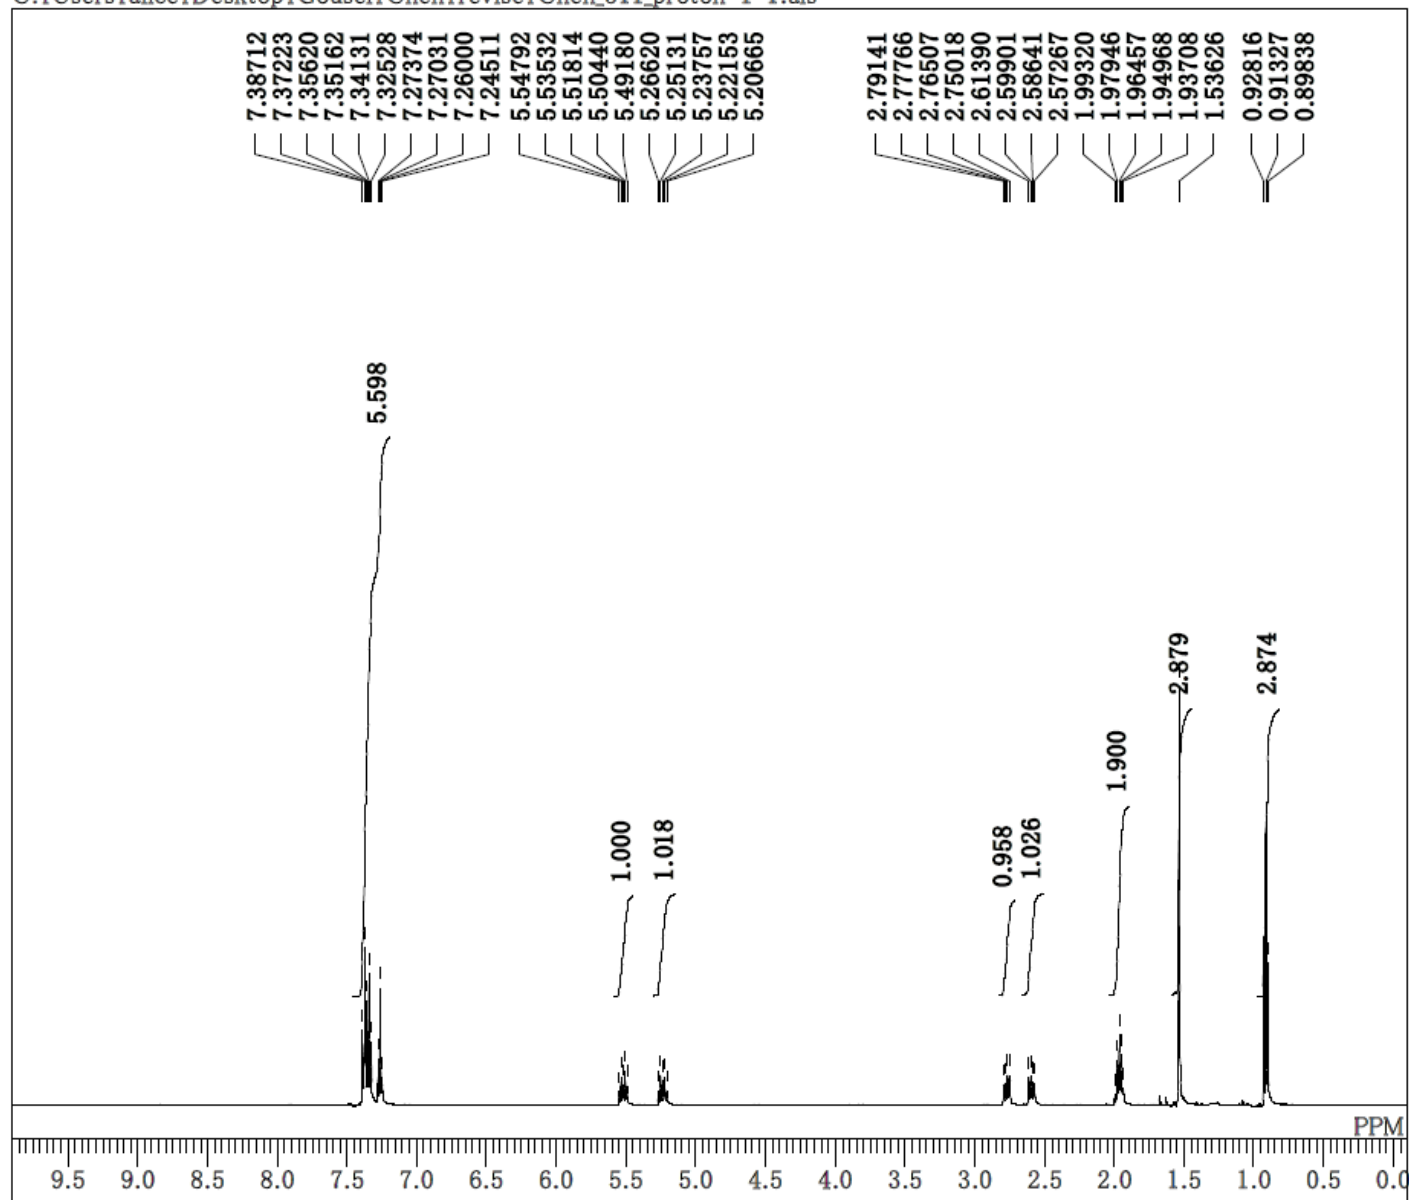

DFILE  
COMNT  
DATIM  
OBNUC  
EXMOD  
OBFRQ  
OBSET  
OBFIN  
POINT  
FREQU  
SCANS  
ACQTM  
PD  
PW1  
IRNUC  
CTEMP  
SLVNT  
EXREF  
BF  
RGAIN

Chen\_511\_proton-1-1.als

2020-10-24 21:32:02

<sup>1</sup>H

proton.jxp

500.16 MHz

2.41 KHz

6.01 Hz

13107

7507.51 Hz

8

1.7459 sec

6.0000 sec

5.55 usec

<sup>1</sup>H

21.6 c

CDCL<sub>3</sub>

7.26 ppm

0.12 Hz

38

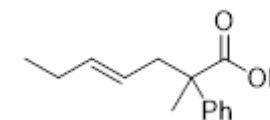

C:\Users\Valice\Desktop\Gousei\Chen\revise\Chen\_511\_carbon-1-1.als

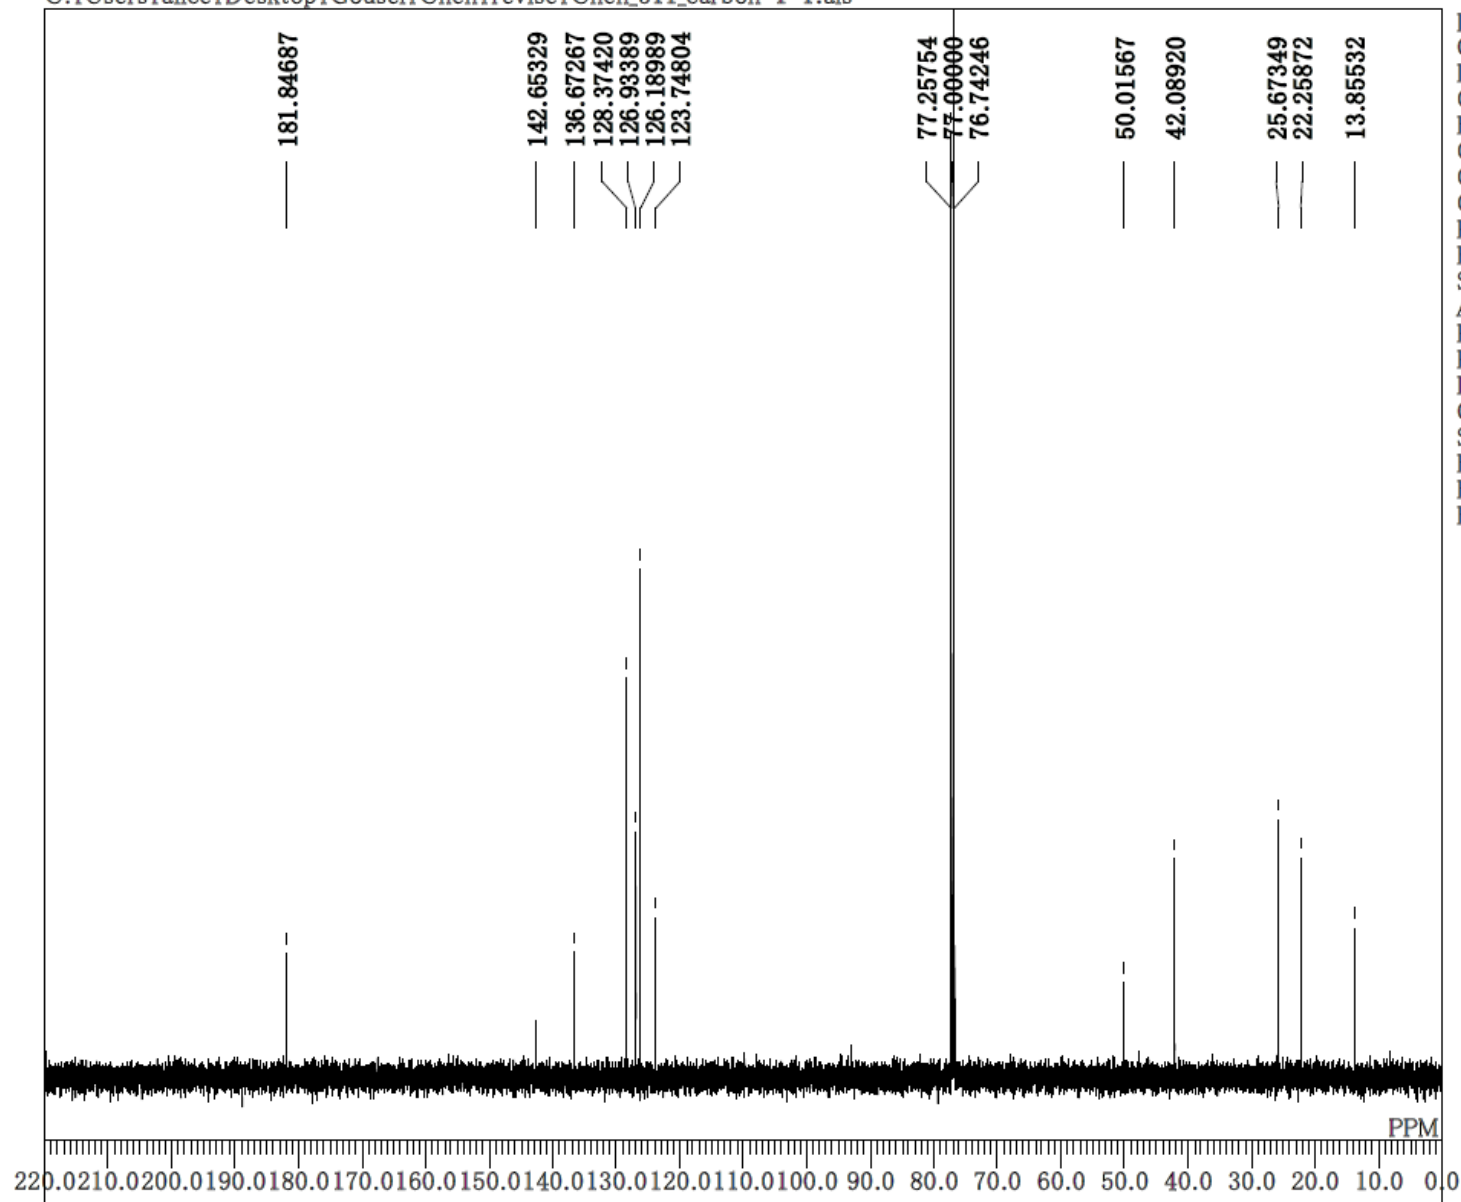

DFILE  
COMNT  
DATIM  
OBNUC  
EXMOD  
OBFRQ  
OBSET  
OBFIN  
POINT  
FREQU  
SCANS  
ACQTM  
PD  
PW1  
IRNUC  
CTEMP  
SLVNT  
EXREF  
BF  
RGAIN

Chen\_511\_carbon-1-1.als

2020-12-02 21:25:44  
13C  
carbon.jxp  
125.77 MHz  
7.87 KHz  
4.21 Hz  
26214  
31446.54 Hz  
205  
0.8336 sec  
2.0000 sec  
3.40 usec  
1H  
21.9 c  
CDCL3  
77.00 ppm  
0.12 Hz  
60

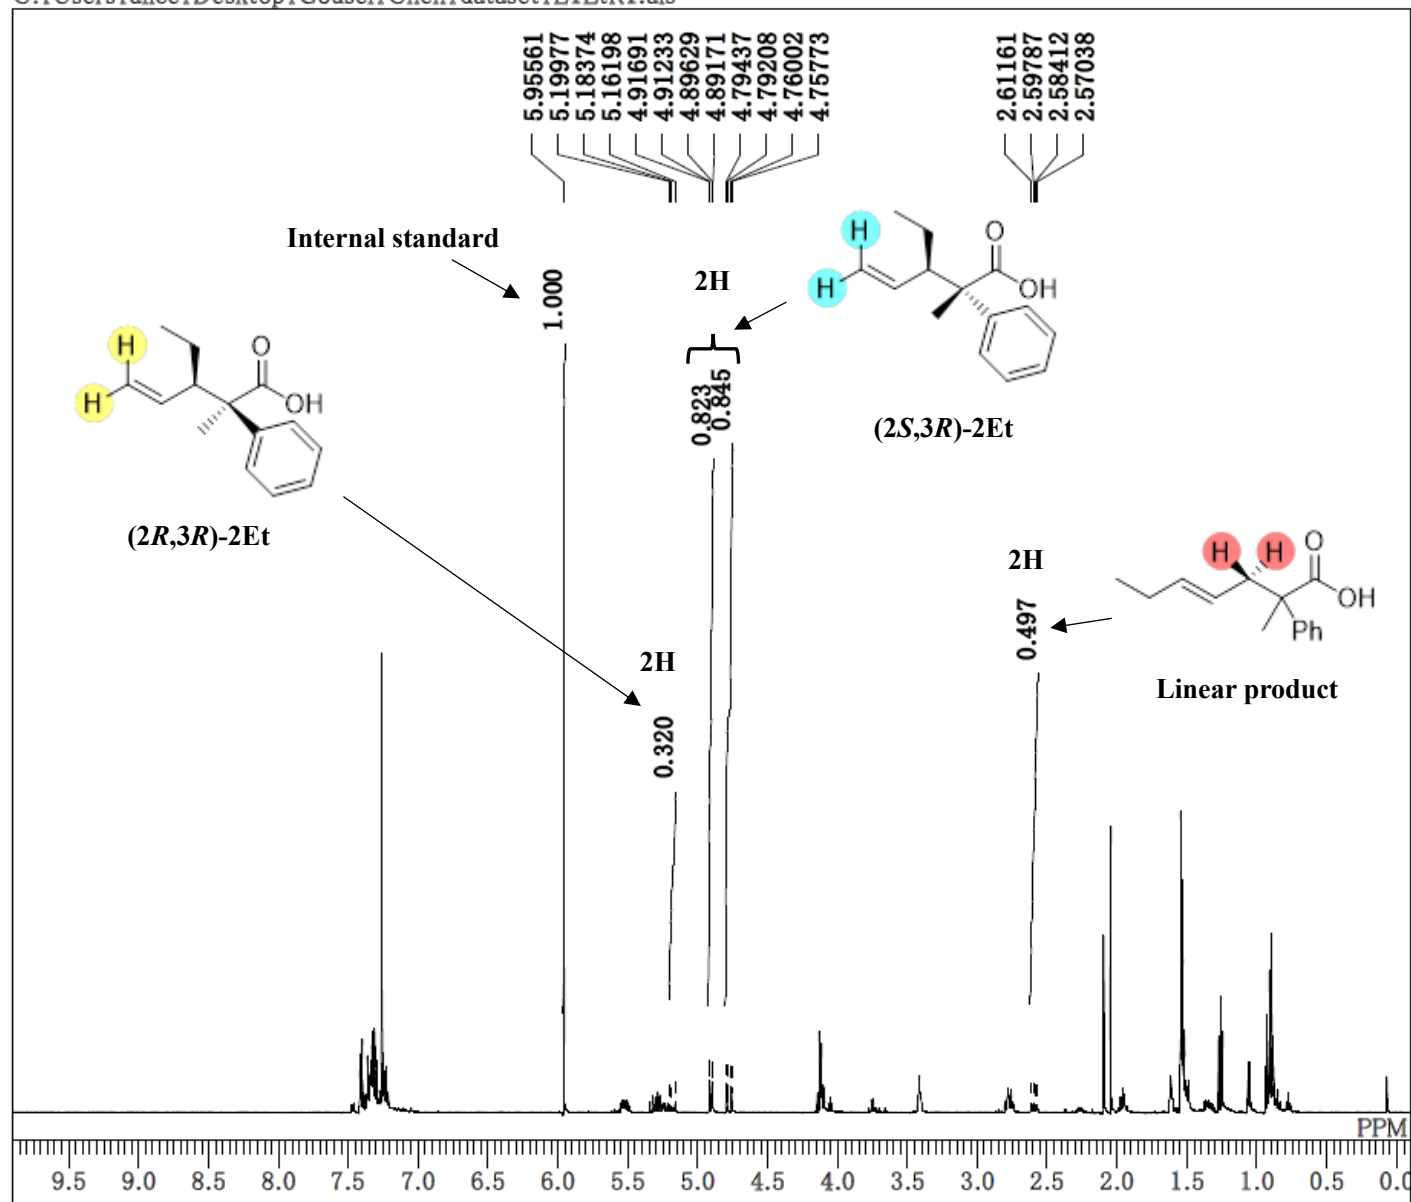

DFILE L1EtR1.als  
 COMNT  
 DATIM 2018-11-23 13:05:40  
 OBNUC 1H  
 EXMOD proton.jxp  
 OBFRQ 500.16 MHz  
 OBSET 2.41 KHz  
 OBFIN 6.01 Hz  
 POINT 13107  
 FREQU 7507.51 Hz  
 SCANS 8  
 ACQTM 1.7459 sec  
 PD 5.0000 sec  
 PW1 5.55 usec  
 IRNUC 1H  
 CTEMP 21.9 c  
 SLVNT CDCL3  
 EXREF 7.26 ppm  
 BF 0.12 Hz  
 RGAIN 32

**L1/1Et, R**

(1<sup>st</sup> trial)

94%, 5.2/1 dr, 2.0/1 b/l

C:\Users\Valice\Desktop\Gousei\Chen\dataset\L1EtR2.als

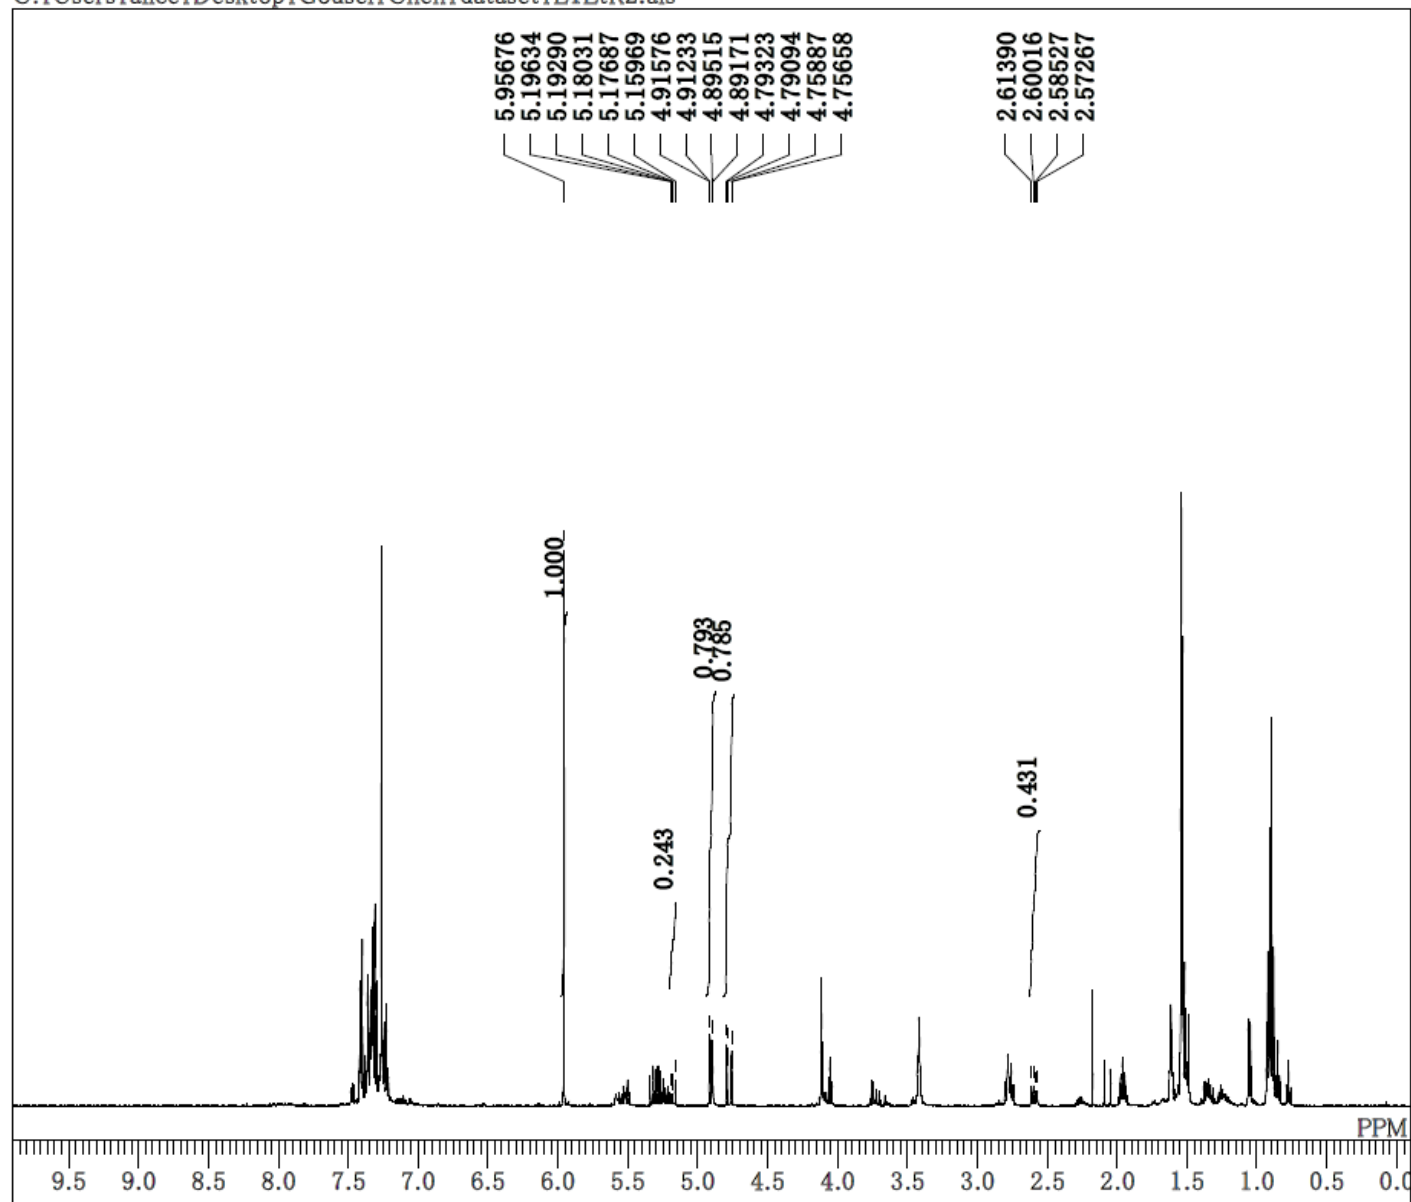

DFILE L1EtR2.als  
 COMNT  
 DATIM 2020-08-26 22:00:02  
 OBNUC 1H  
 EXMOD proton.jxp  
 OBFRQ 500.16 MHz  
 OBSET 2.41 KHz  
 OBFIN 6.01 Hz  
 POINT 13107  
 FREQU 7507.51 Hz  
 SCANS 8  
 ACQTM 1.7459 sec  
 PD 6.0000 sec  
 PW1 5.55 usec  
 IRNUC 1H  
 CTEMP 22.0 c  
 SLVNT CDCL3  
 EXREF 7.26 ppm  
 BF 0.12 Hz  
 RGAIN 42

**L1/1Et, R**

(2<sup>nd</sup> trial)

85%, 6.5/1 dr, 2.1/1 b/l

C:\Users\alice\Desktop\Gousei\Chen\dataset\L1Pr1.als

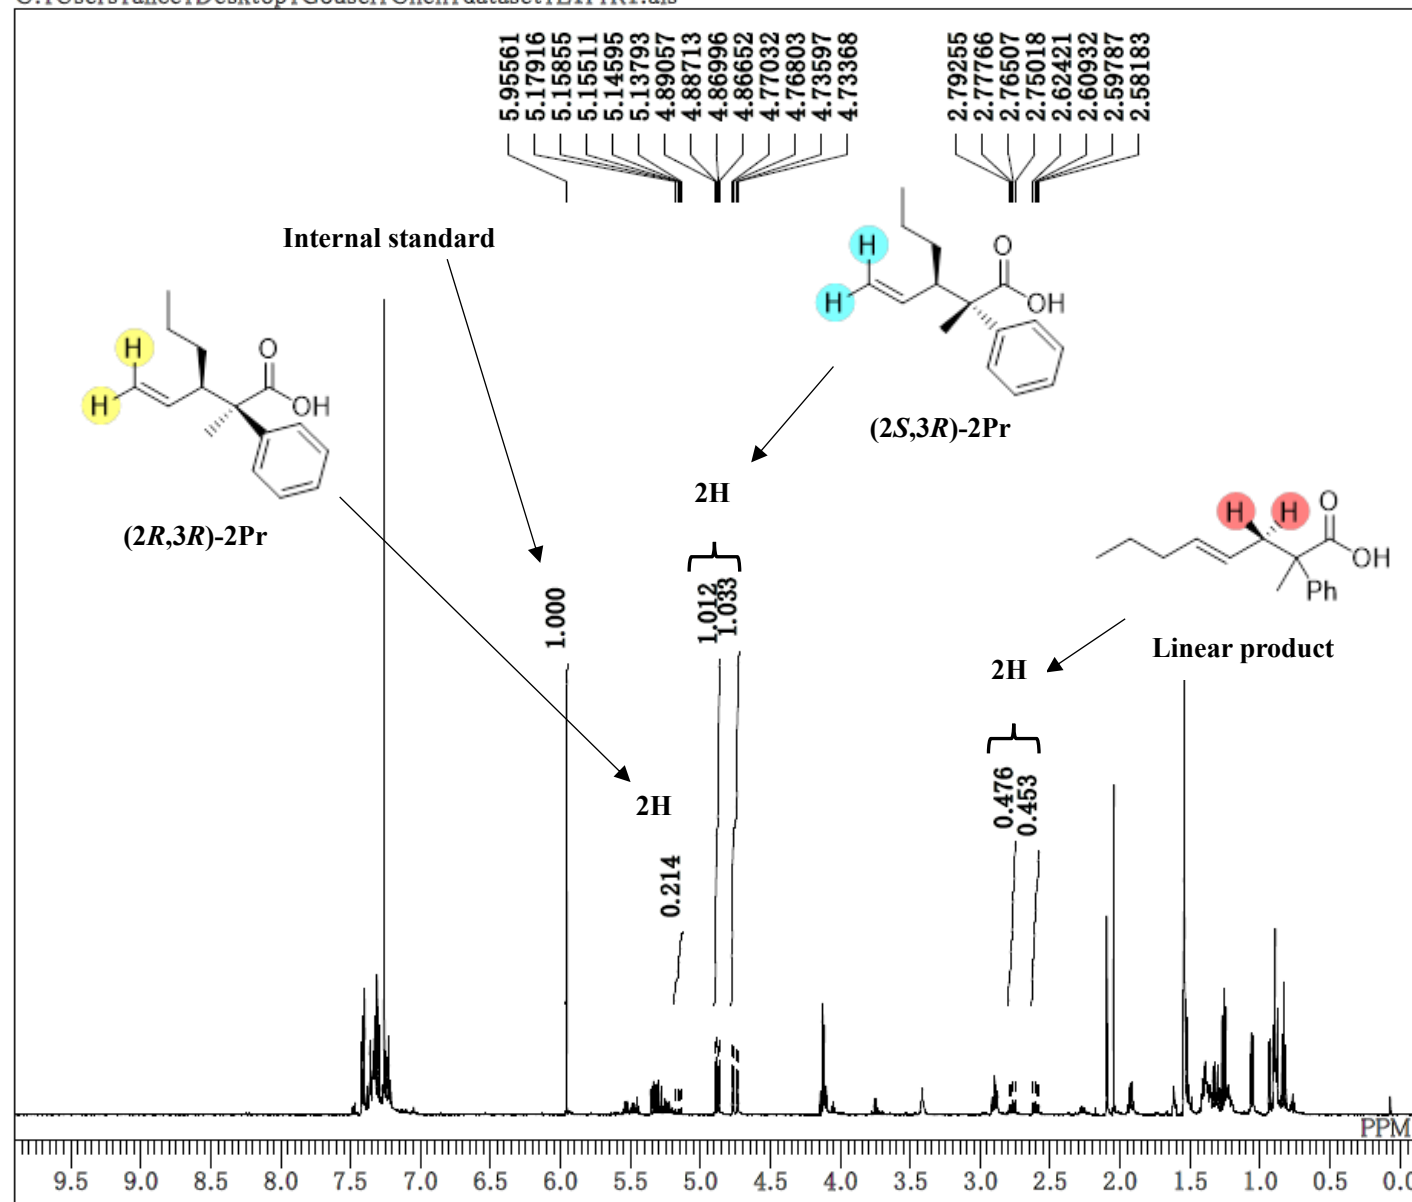

DFILE L1Pr1.als  
 COMNT  
 DATIM 2018-11-21 15:32:39  
 OBNUC 1H  
 EXMOD proton.jxp  
 OBFRQ 500.16 MHz  
 OBSET 2.41 KHz  
 OBFIN 6.01 Hz  
 POINT 13107  
 FREQU 7507.51 Hz  
 SCANS 8  
 ACQTM 1.7459 sec  
 PD 5.0000 sec  
 PW1 5.55 usec  
 IRNUC 1H  
 CTEMP 21.9 c  
 SLVNT CDCL3  
 EXREF 7.26 ppm  
 BF 0.12 Hz  
 RGAIN 32

**L1/1Pr, R**  
 (1<sup>st</sup> trial)  
 100%, 9.6/1 dr, 2.4/1 b/l

C:\Users\Valice\Desktop\Gousei\Chen\dataset\L1Pr2.als

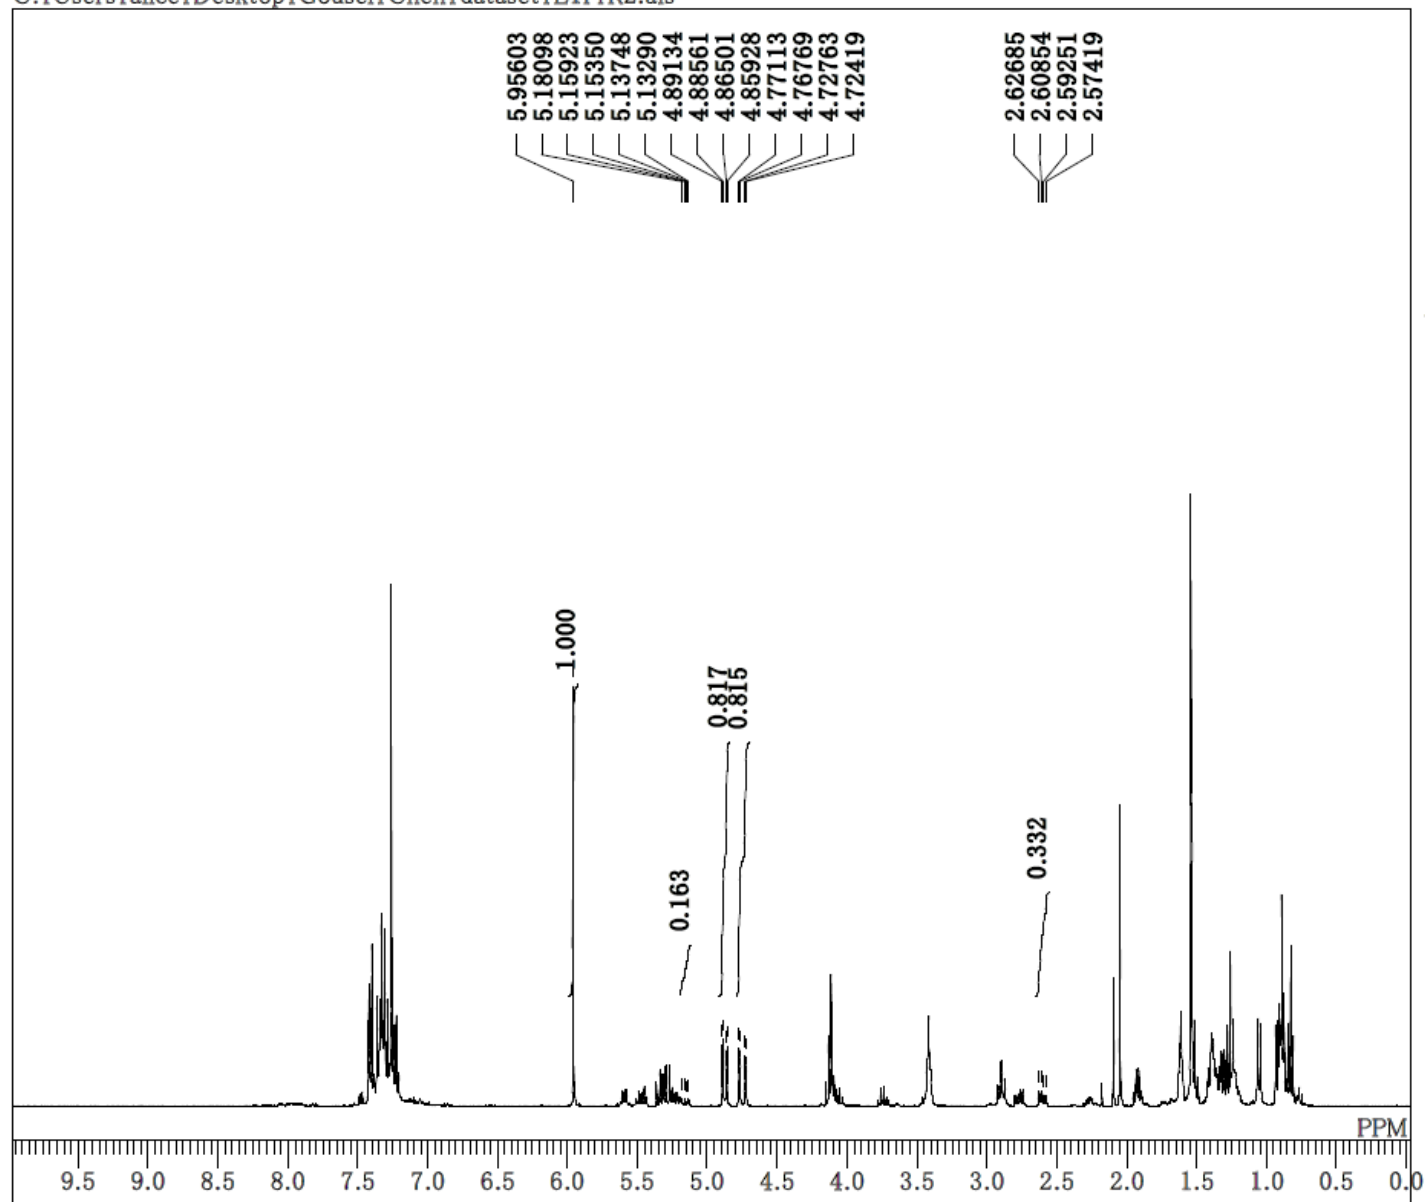

DFILE L1Pr2.als  
COMNT  
DATIM 26-08-2020 22:58:05  
OBNUC 1H  
EXMOD proton.jxp  
OBFRQ 391.78 MHz  
OBSET 8.51 KHz  
OBFIN 3.34 Hz  
POINT 13107  
FREQU 5878.90 Hz  
SCANS 8  
ACQTM 2.2295 sec  
PD 6.0000 sec  
PW1 5.17 usec  
IRNUC 1H  
CTEMP 21.0 c  
SLVNT CDCL3  
EXREF 7.26 ppm  
BF 0.42 Hz  
RGAIN 40

**L1/1Pr, R**  
(2<sup>nd</sup> trial)  
77%, 10.0/1 dr, 2.7/1 b/l

C:\Users\Valice\Desktop\Gousei\Chen\dataset\L2EtR1.als

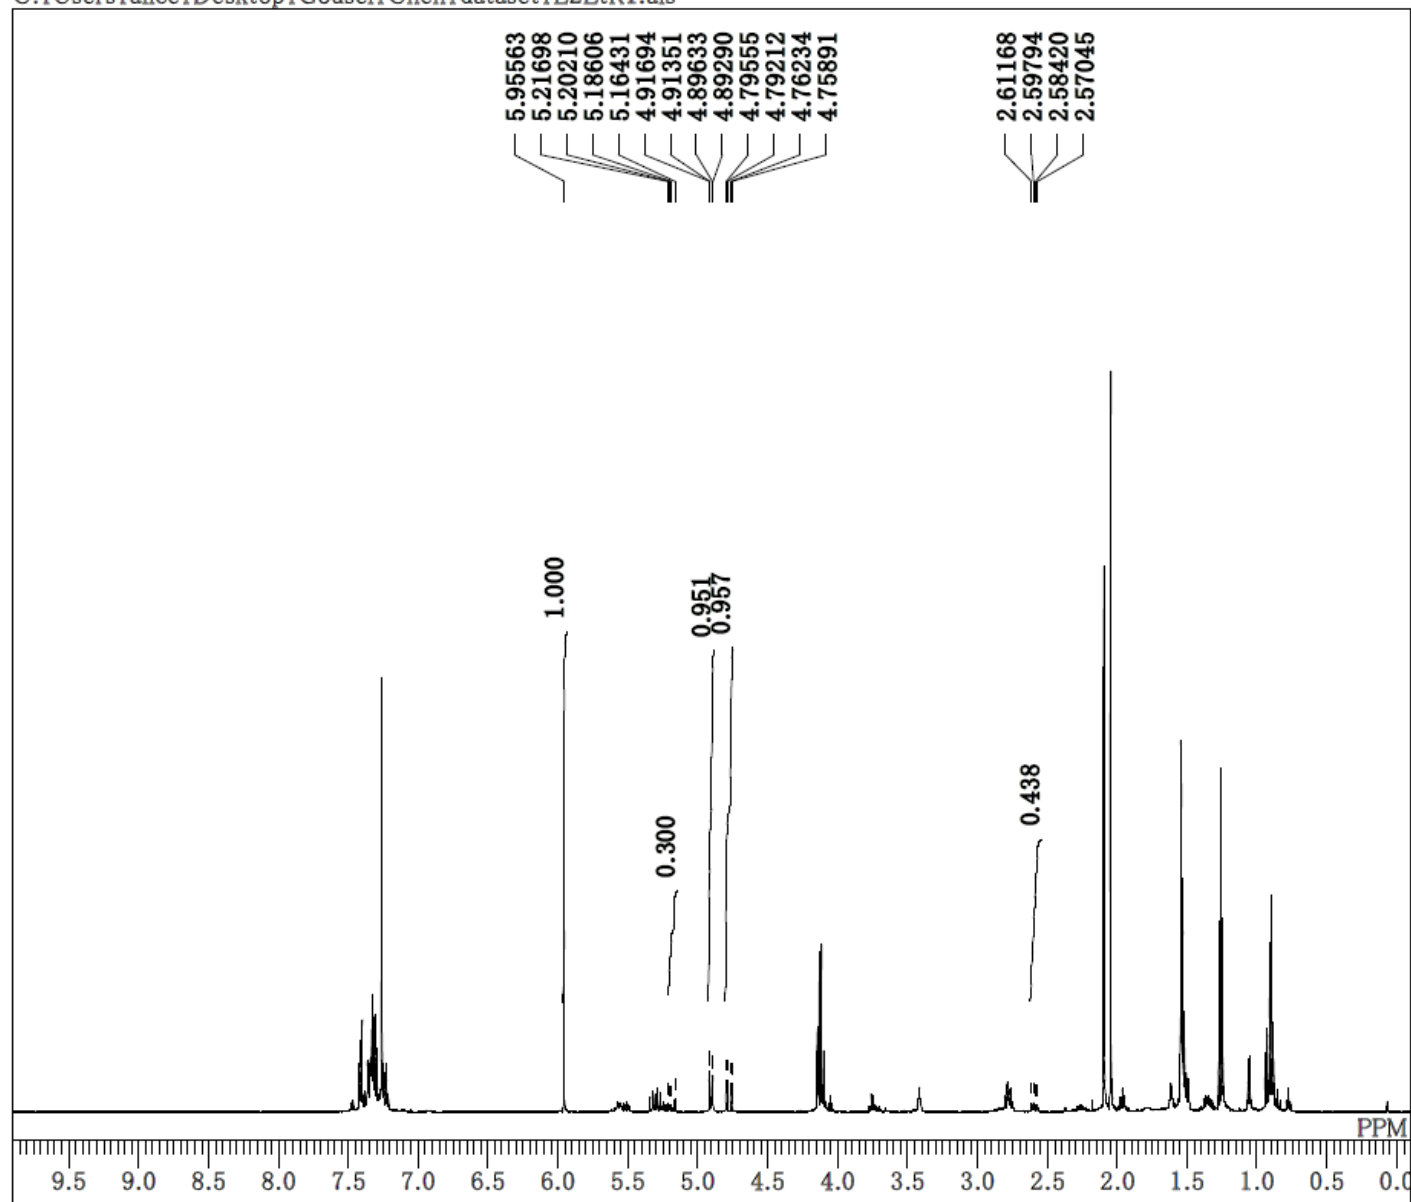

DFILE L2EtR1.als  
 COMNT  
 DATIM 2018-11-13 16:21:37  
 OBNUC 1H  
 EXMOD proton.jxp  
 OBFRQ 500.16 MHz  
 OBSET 2.41 KHz  
 OBFIN 6.01 Hz  
 POINT 16384  
 FREQU 9384.38 Hz  
 SCANS 8  
 ACQTM 1.7459 sec  
 PD 5.0000 sec  
 PW1 5.55 usec  
 IRNUC 1H  
 CTEMP 22.0 c  
 SLVNT CDCL3  
 EXREF 7.26 ppm  
 BF 0.12 Hz  
 RGAIN 32

**L2/1Et, R**

(1<sup>st</sup> trial)

97%, 6.1/1 dr, 2.4/1 b/l



C:\Users\Valice\Desktop\Gousei\Chen\dataset\L2EtR2.als

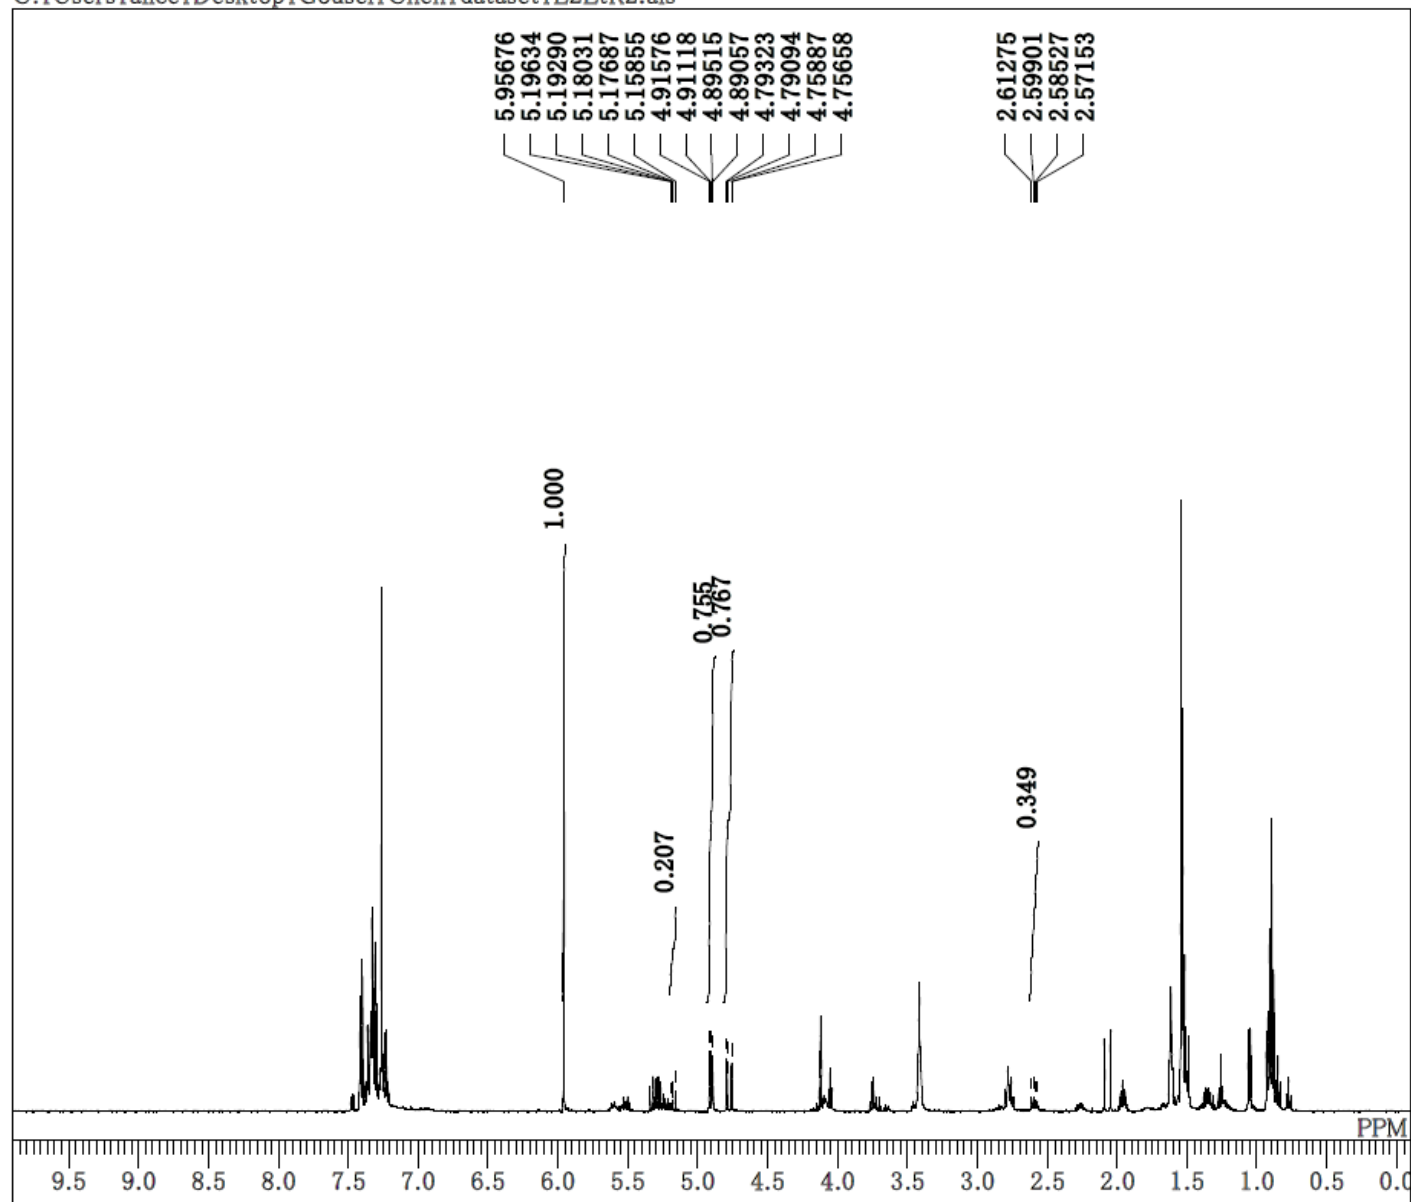

DFILE L2EtR2.als  
 COMNT  
 DATIM 2020-08-28 00:42:14  
 OBNUC 1H  
 EXMOD proton.jxp  
 OBFRQ 500.16 MHz  
 OBSET 2.41 KHz  
 OBFIN 6.01 Hz  
 POINT 13107  
 FREQU 7507.51 Hz  
 SCANS 8  
 ACQTM 1.7459 sec  
 PD 6.0000 sec  
 PW1 5.55 usec  
 IRNUC 1H  
 CTEMP 22.0 c  
 SLVNT CDCL3  
 EXREF 7.26 ppm  
 BF 0.12 Hz  
 RGAIN 42

**L2/1Et, R**  
 (2<sup>nd</sup> trial)  
 76%, 7.4/1 dr, 2.5/1 b/l

C:\Users\Valice\Desktop\Gousei\Chen\aaaaaaaaaaaa\L2PrR1.als

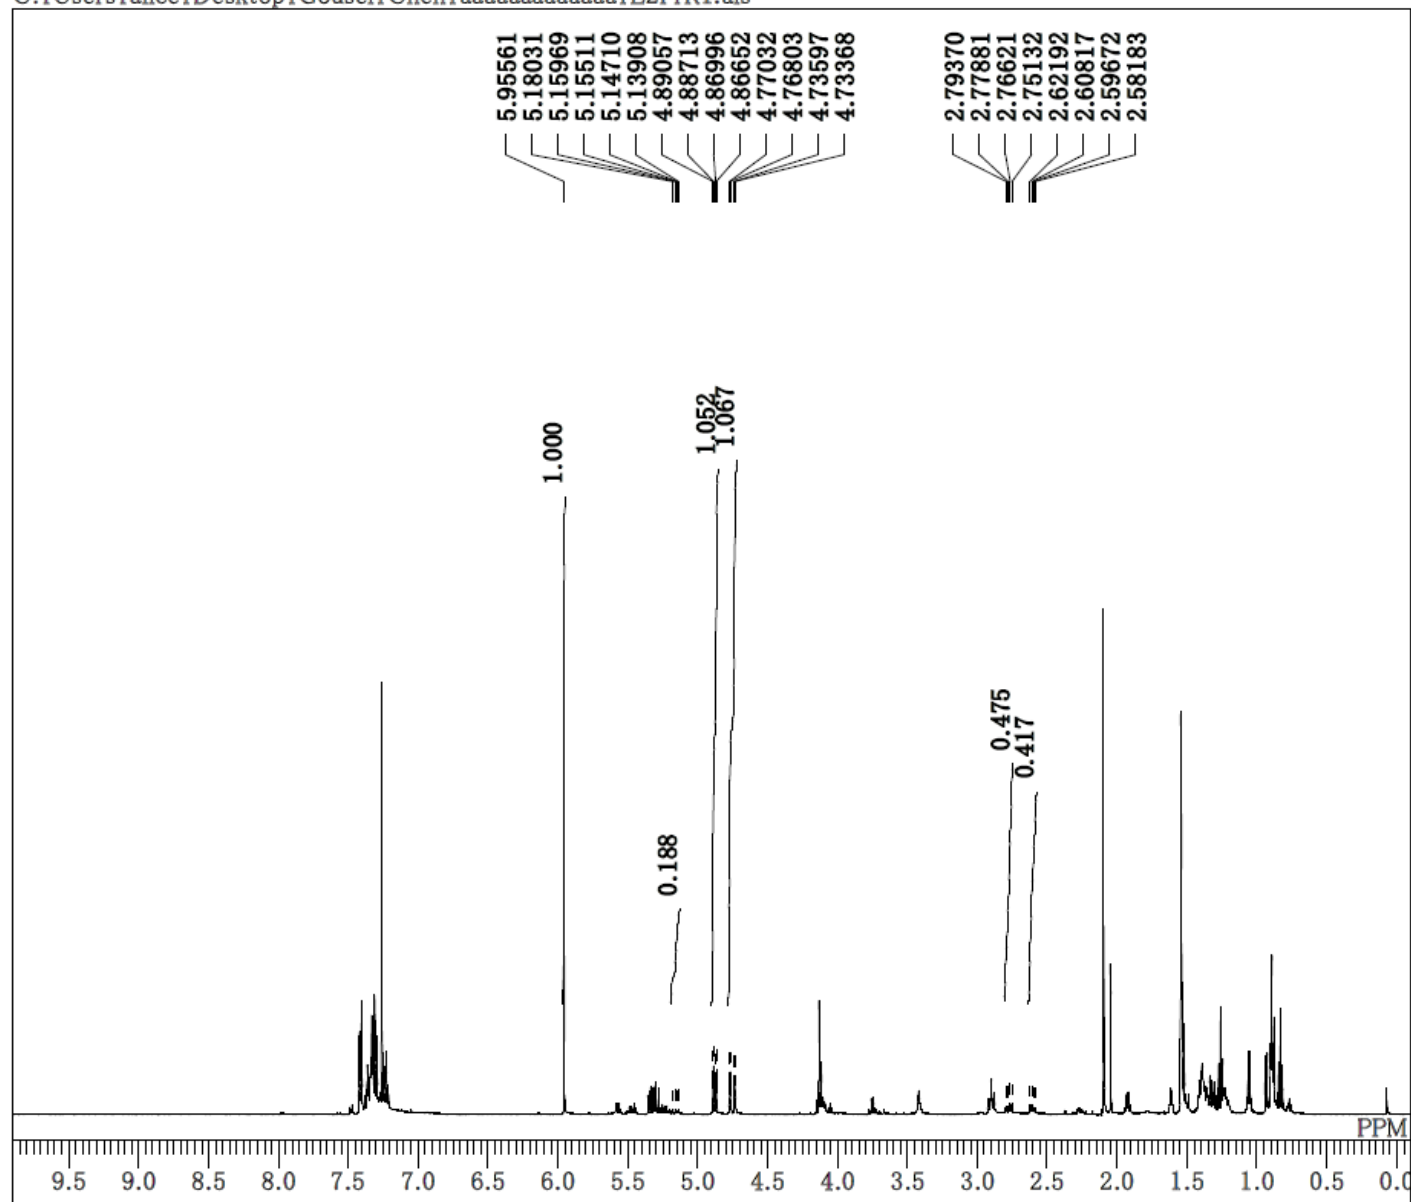

DFILE L2PrR1.als  
 COMNT  
 DATIM 2018-11-11 23:00:26  
 OBNUC 1H  
 EXMOD proton.jxp  
 OBFRQ 500.16 MHz  
 OBSET 2.41 KHz  
 OBFIN 6.01 Hz  
 POINT 13107  
 FREQU 7507.51 Hz  
 SCANS 8  
 ACQTM 1.7459 sec  
 PD 5.0000 sec  
 PW1 5.55 usec  
 IRNUC 1H  
 CTEMP 21.9 c  
 SLVNT CDCL3  
 EXREF 7.26 ppm  
 BF 0.12 Hz  
 RGAIN 32

**L2/1Pr, R**

(1<sup>st</sup> trial)

100%, 11.3/1 dr, 2.6/1 b/l

C:\Users\Valice\Desktop\Gousei\Chen\dataset\L2PrR2.als

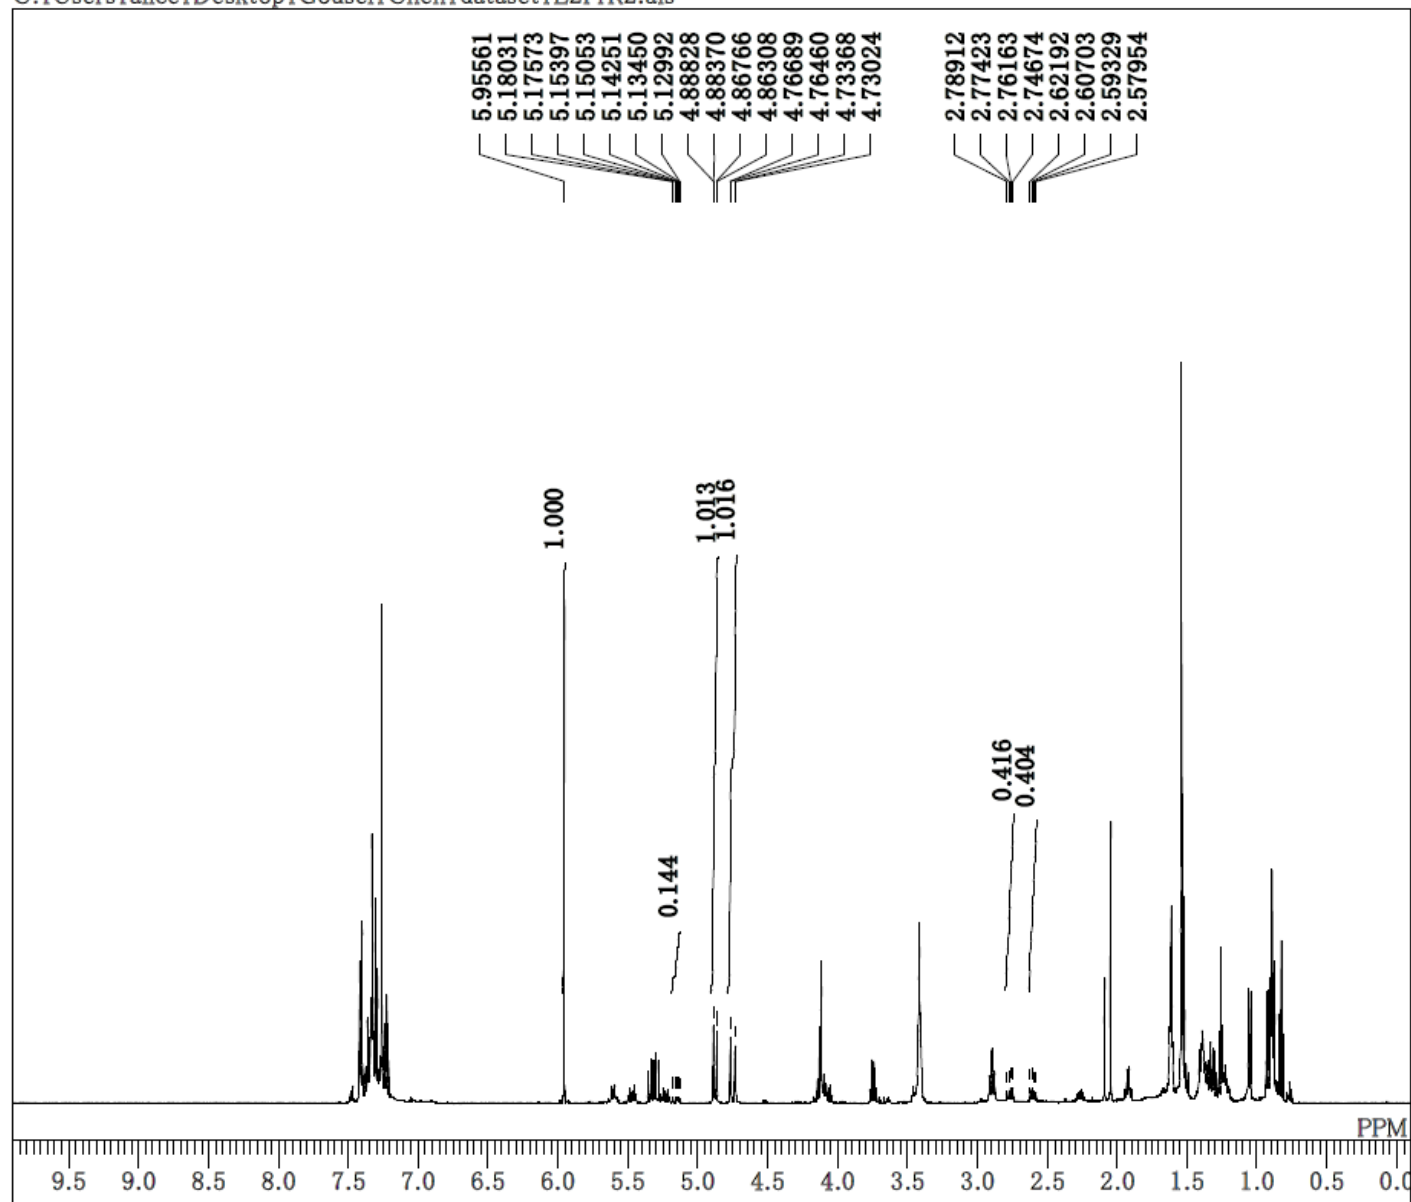

DFILE L2PrR2.als  
 COMNT  
 DATIM 2020-08-28 00:49:05  
 OBNUC 1H  
 EXMOD proton.jxp  
 OBFRQ 500.16 MHz  
 OBSET 2.41 KHz  
 OBFIN 6.01 Hz  
 POINT 13107  
 FREQU 7507.51 Hz  
 SCANS 8  
 ACQTM 1.7459 sec  
 PD 6.0000 sec  
 PW1 5.55 usec  
 IRNUC 1H  
 CTEMP 21.8 c  
 SLVNT CDCL3  
 EXREF 7.26 ppm  
 BF 0.12 Hz  
 RGAIN 42

**L2/1Pr, R**

(2<sup>nd</sup> trial)

94%, 14.1/1 dr, 2.7/1 b/l

C:\Users\Valice\Desktop\Gousei\Chen\dataset\L3EtR1.als

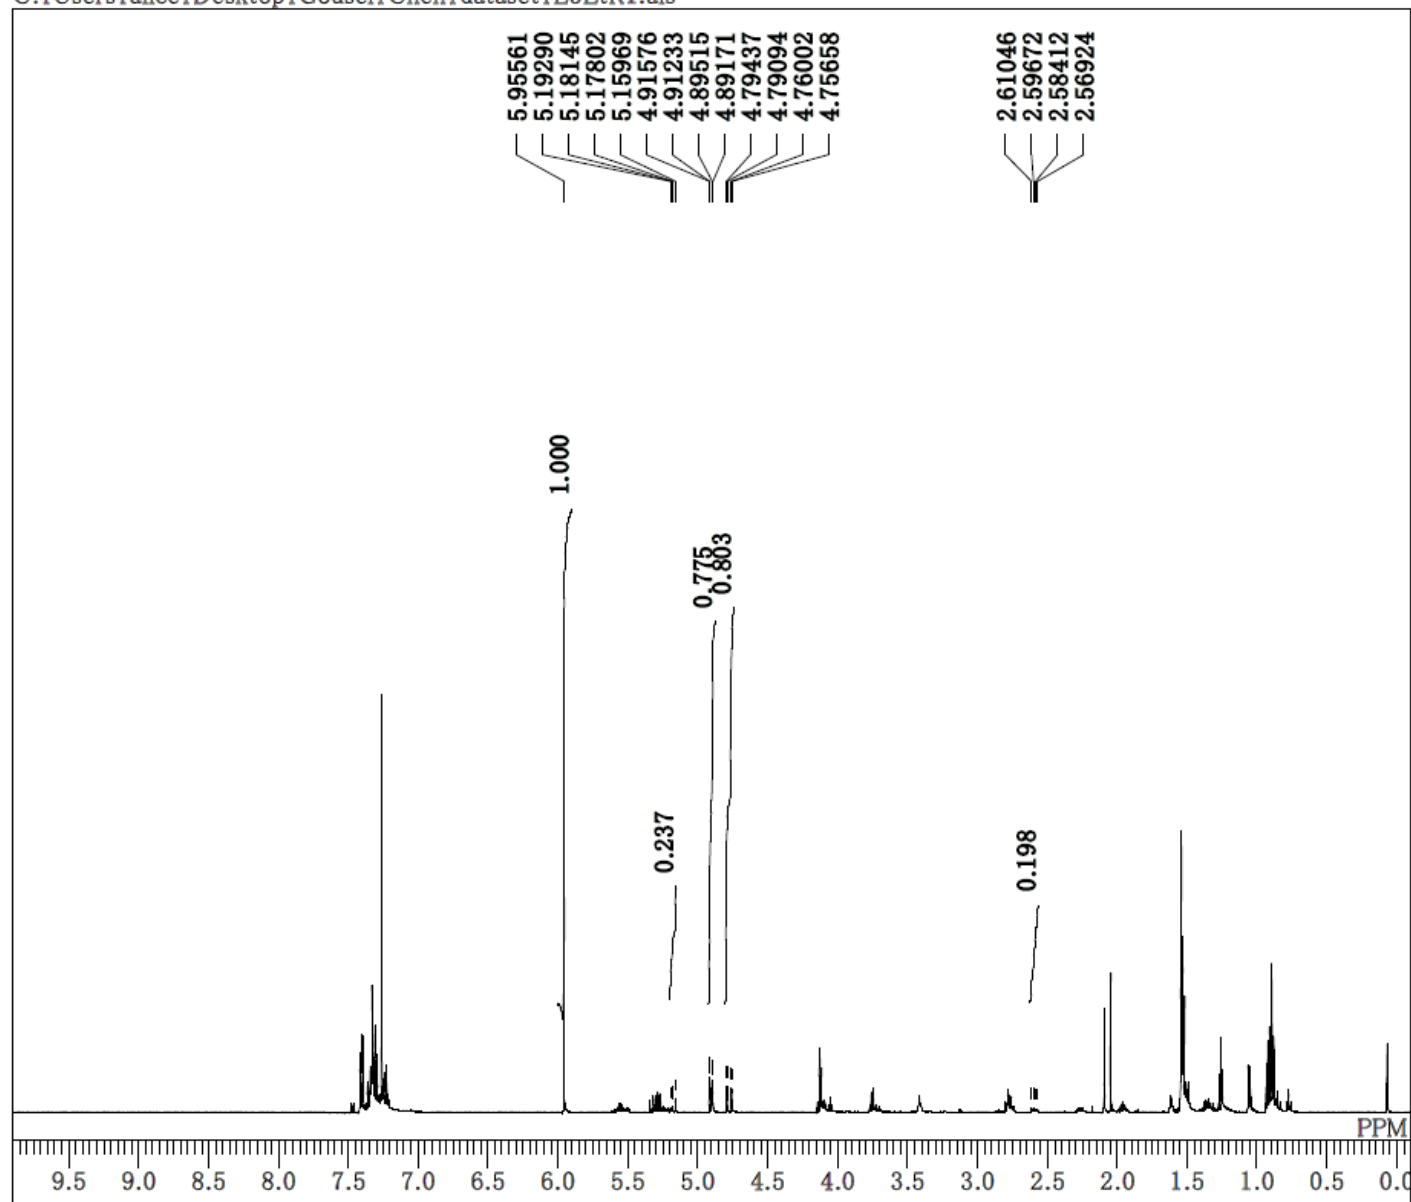

DFILE L3EtR1.als  
 COMNT  
 DATIM 2019-09-09 11:30:41  
 OBNUC 1H  
 EXMOD proton.jxp  
 OBFRQ 500.16 MHz  
 OBSET 2.41 KHz  
 OBFIN 6.01 Hz  
 POINT 13107  
 FREQU 7507.51 Hz  
 SCANS 8  
 ACQTM 1.7459 sec  
 PD 6.0000 sec  
 PW1 5.55 usec  
 IRNUC 1H  
 CTEMP 21.9 c  
 SLVNT CDCL3  
 EXREF 7.26 ppm  
 BF 0.12 Hz  
 RGAIN 40

**L3/1Et, R**

(1<sup>st</sup> trial)

70%, 6.7/1 dr, 4.6/1 b/l

C:\Users\Valice\Desktop\Gousei\Chen\dataset\L3EtR2.als

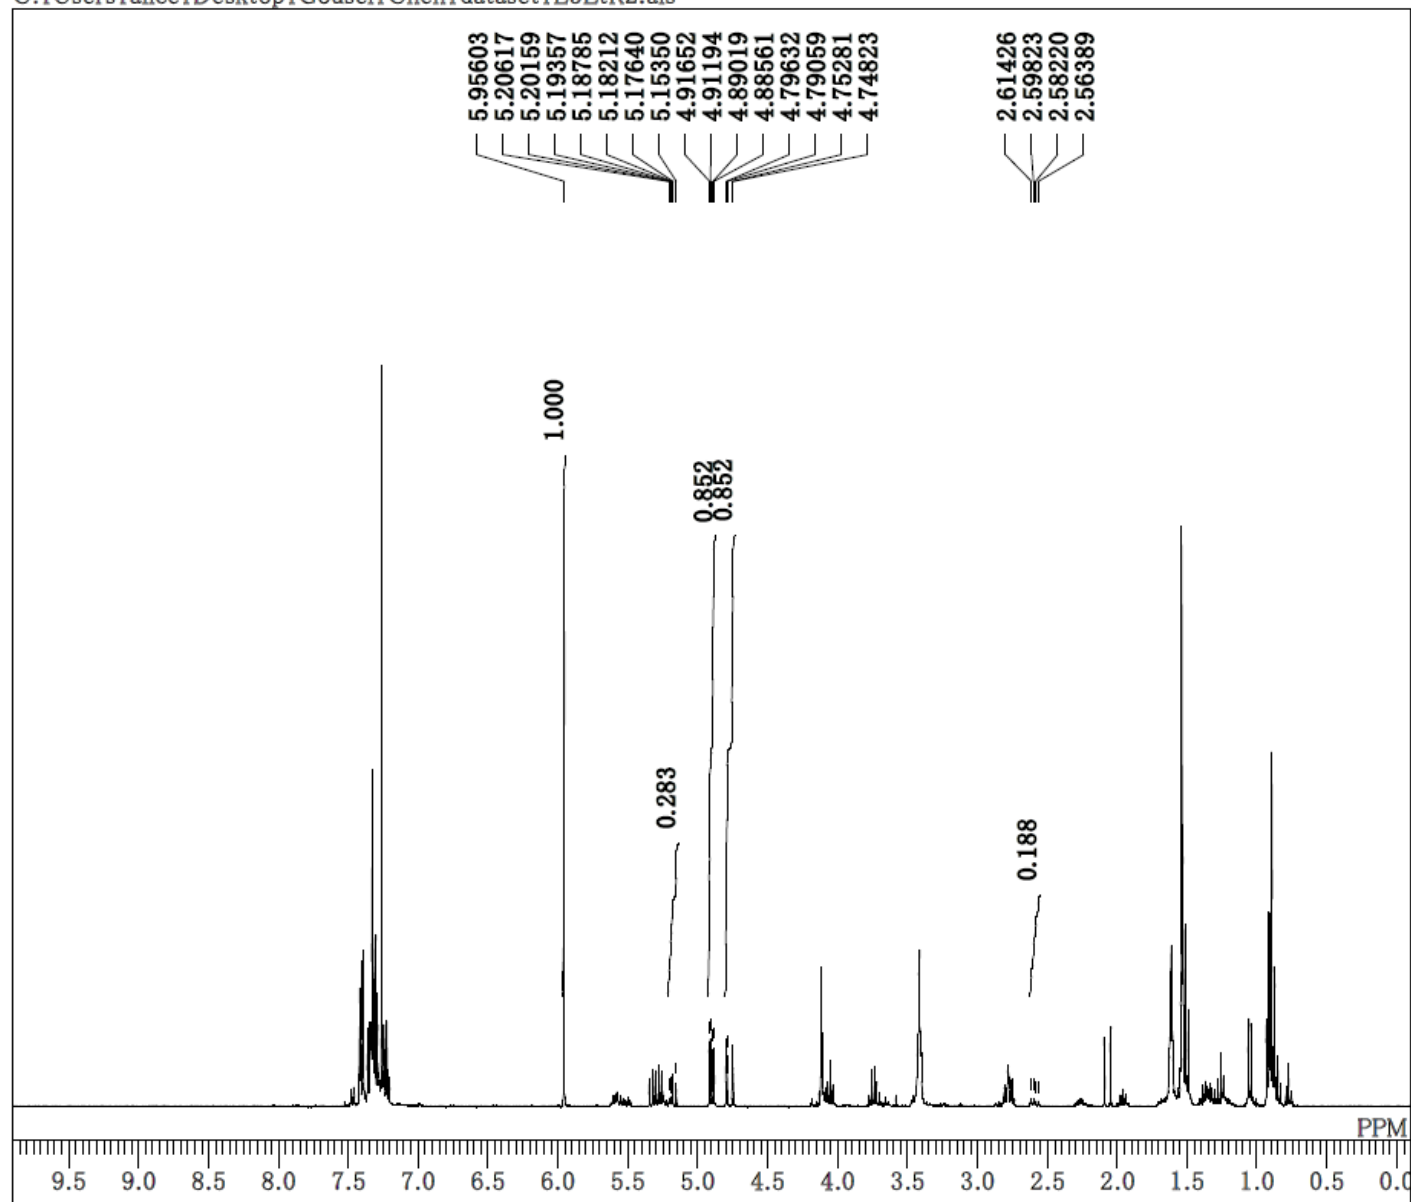

DFILE L3EtR2.als  
 COMNT  
 DATIM 23-08-2020 21:28:18  
 OBNUC 1H  
 EXMOD proton.jxp  
 OBFRQ 391.78 MHz  
 OBSET 8.51 KHz  
 OBFIN 3.34 Hz  
 POINT 13107  
 FREQU 5878.90 Hz  
 SCANS 8  
 ACQTM 2.2295 sec  
 PD 6.0000 sec  
 PW1 5.17 usec  
 IRNUC 1H  
 CTEMP 20.8 c  
 SLVNT CDCL3  
 EXREF 7.26 ppm  
 BF 0.12 Hz  
 RGAIN 40

**L3/1Et, R**

(2<sup>nd</sup> trial)

74%, 6.0/1 dr, 5.3/1 b/l

C:\Users\Valice\Desktop\Gousei\Chen\dataset\L3PrR1.als

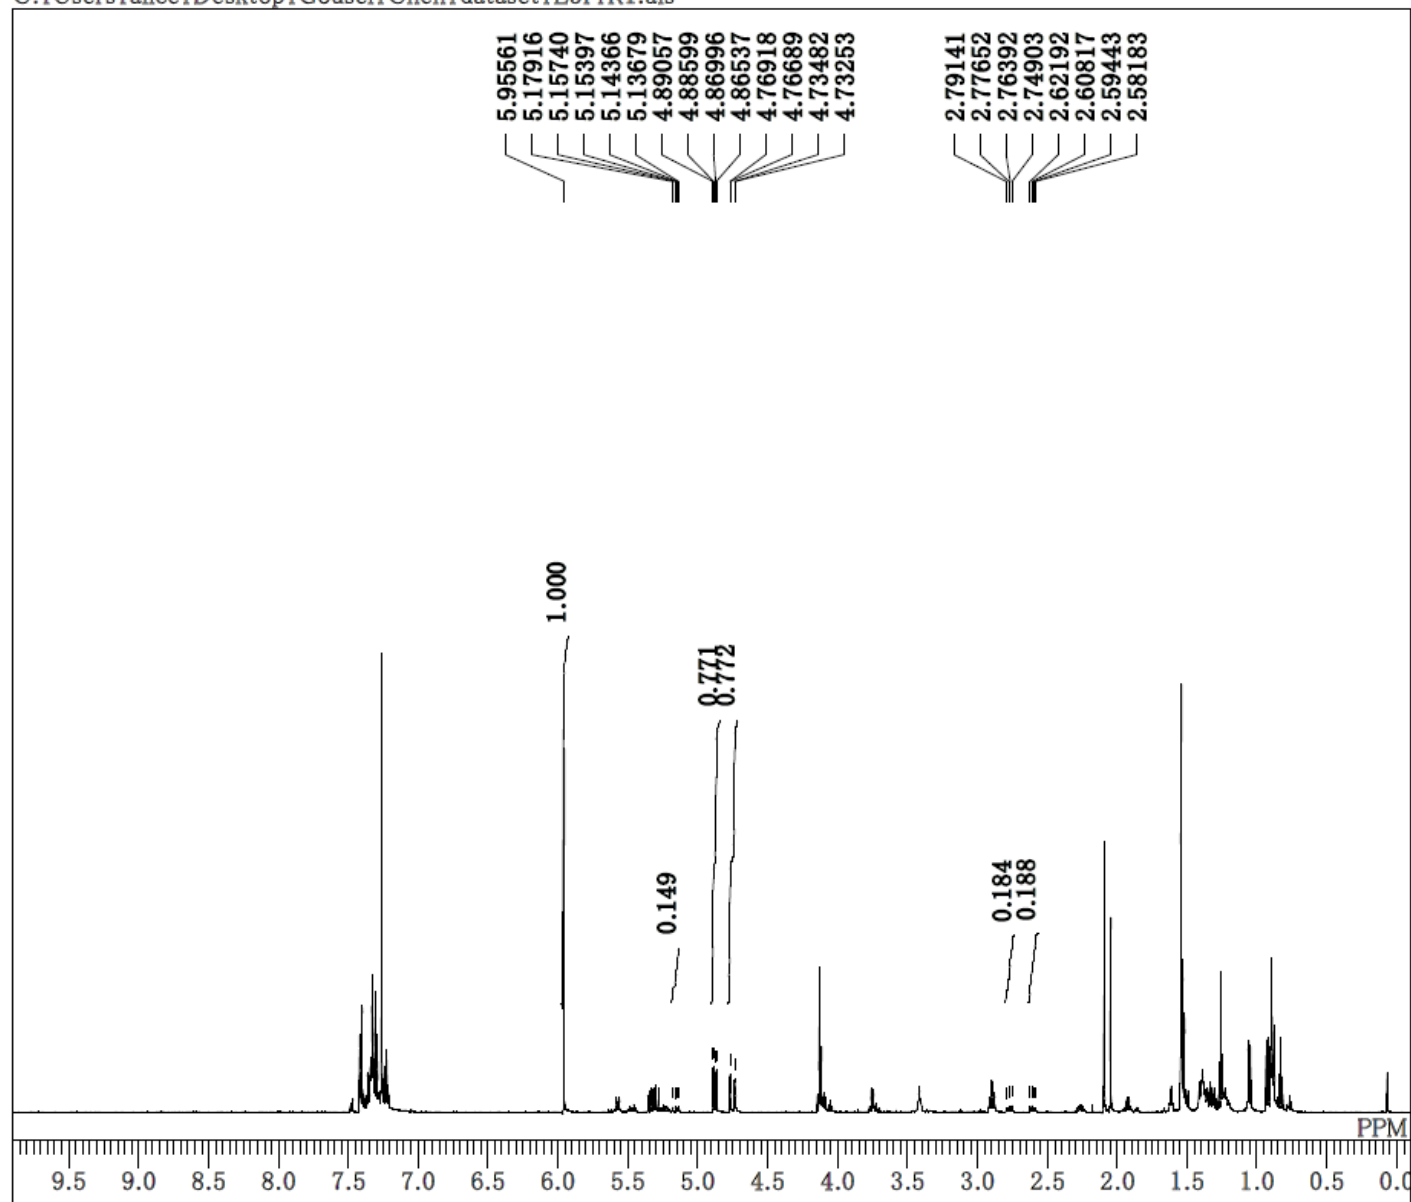

DFILE L3PrR1.als  
 COMNT  
 DATIM 2019-09-09 11:37:36  
 OBNUC 1H  
 EXMOD proton.jxp  
 OBFRQ 500.16 MHz  
 OBSET 2.41 KHz  
 OBFIN 6.01 Hz  
 POINT 13107  
 FREQU 7507.51 Hz  
 SCANS 8  
 ACQTM 1.7459 sec  
 PD 6.0000 sec  
 PW1 5.55 usec  
 IRNUC 1H  
 CTEMP 22.1 c  
 SLVNT CDCL3  
 EXREF 7.26 ppm  
 BF 0.12 Hz  
 RGAIN 40

**L3/1Pr, R**  
 (1<sup>st</sup> trial)  
 65%, 10.4/1 dr, 4.5/1 b/l

C:\Users\Valice\Desktop\Gousei\Chen\dataset\L3PrR2.als

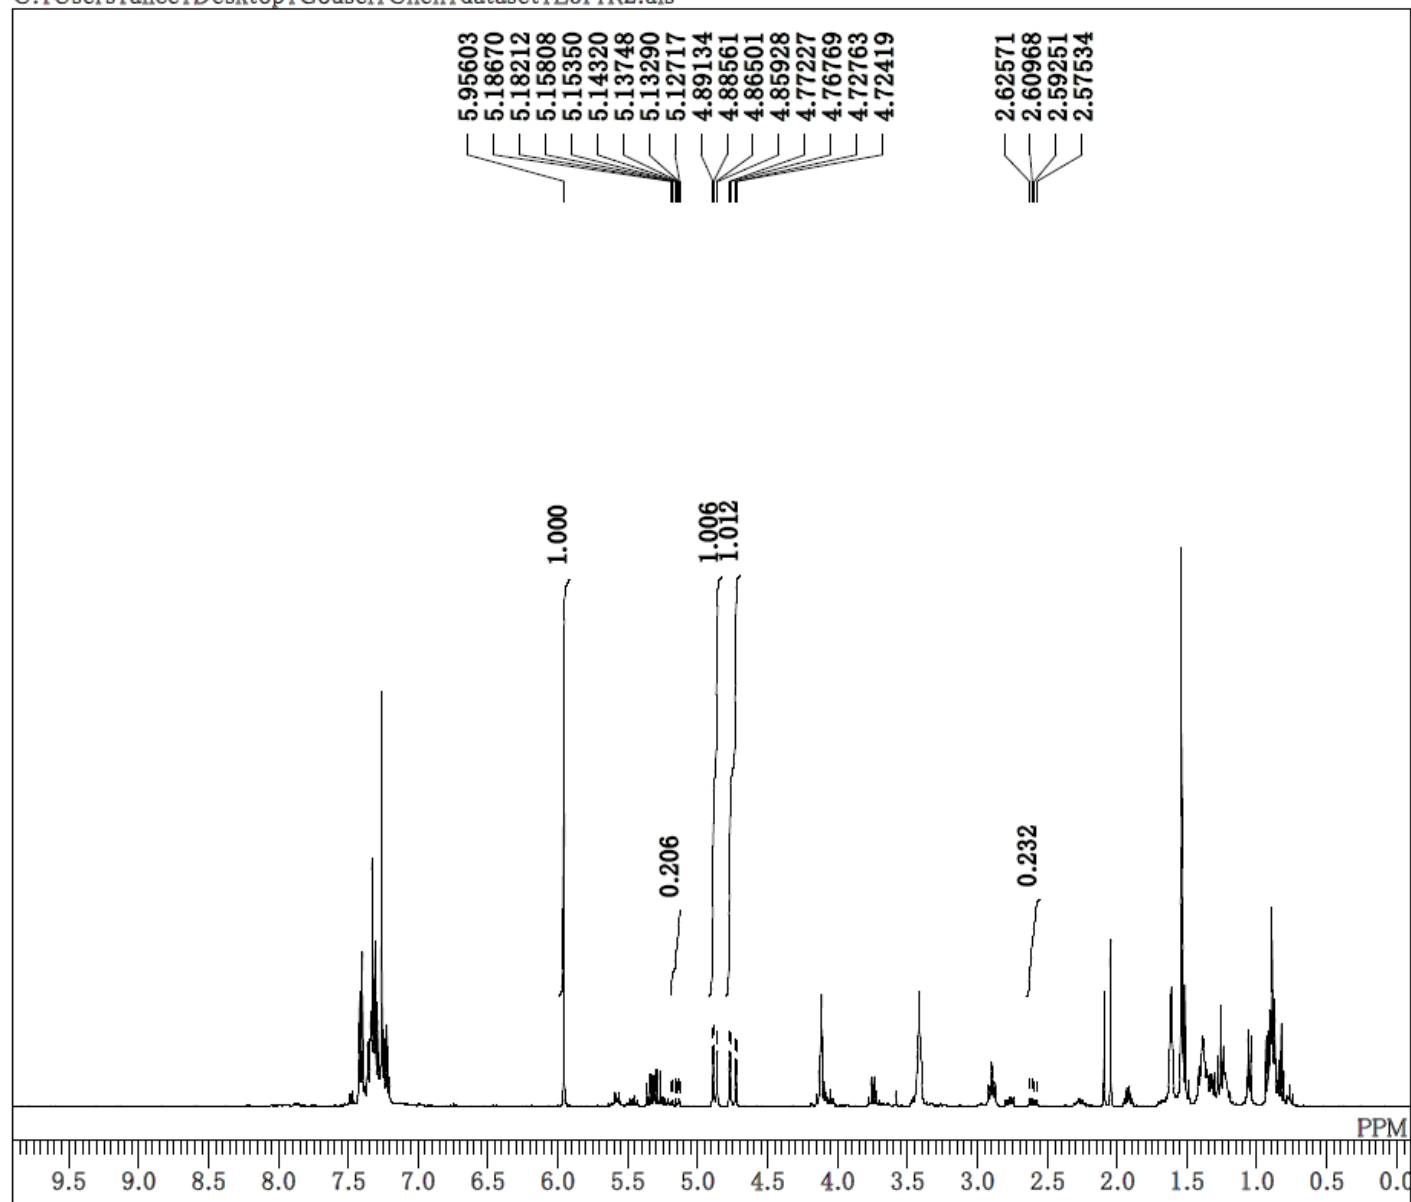

DFILE L3PrR2.als  
 COMNT  
 DATIM 22-08-2020 13:57:30  
 OBNUC 1H  
 EXMOD proton.jxp  
 OBFRQ 391.78 MHz  
 OBSET 8.51 KHz  
 OBFIN 3.34 Hz  
 POINT 13107  
 FREQU 5878.90 Hz  
 SCANS 8  
 ACQTM 2.2295 sec  
 PD 6.0000 sec  
 PW1 5.17 usec  
 IRNUC 1H  
 CTEMP 20.9 c  
 SLVNT CDCL3  
 EXREF 7.26 ppm  
 BF 0.62 Hz  
 RGAIN 40

**L3/1Pr, R**

(2<sup>nd</sup> trial)

85%, 9.8/1 dr, 4.8/1 b/l

C:\Users\Valice\Desktop\Gousei\Chen\dataset\L4EtR1.als

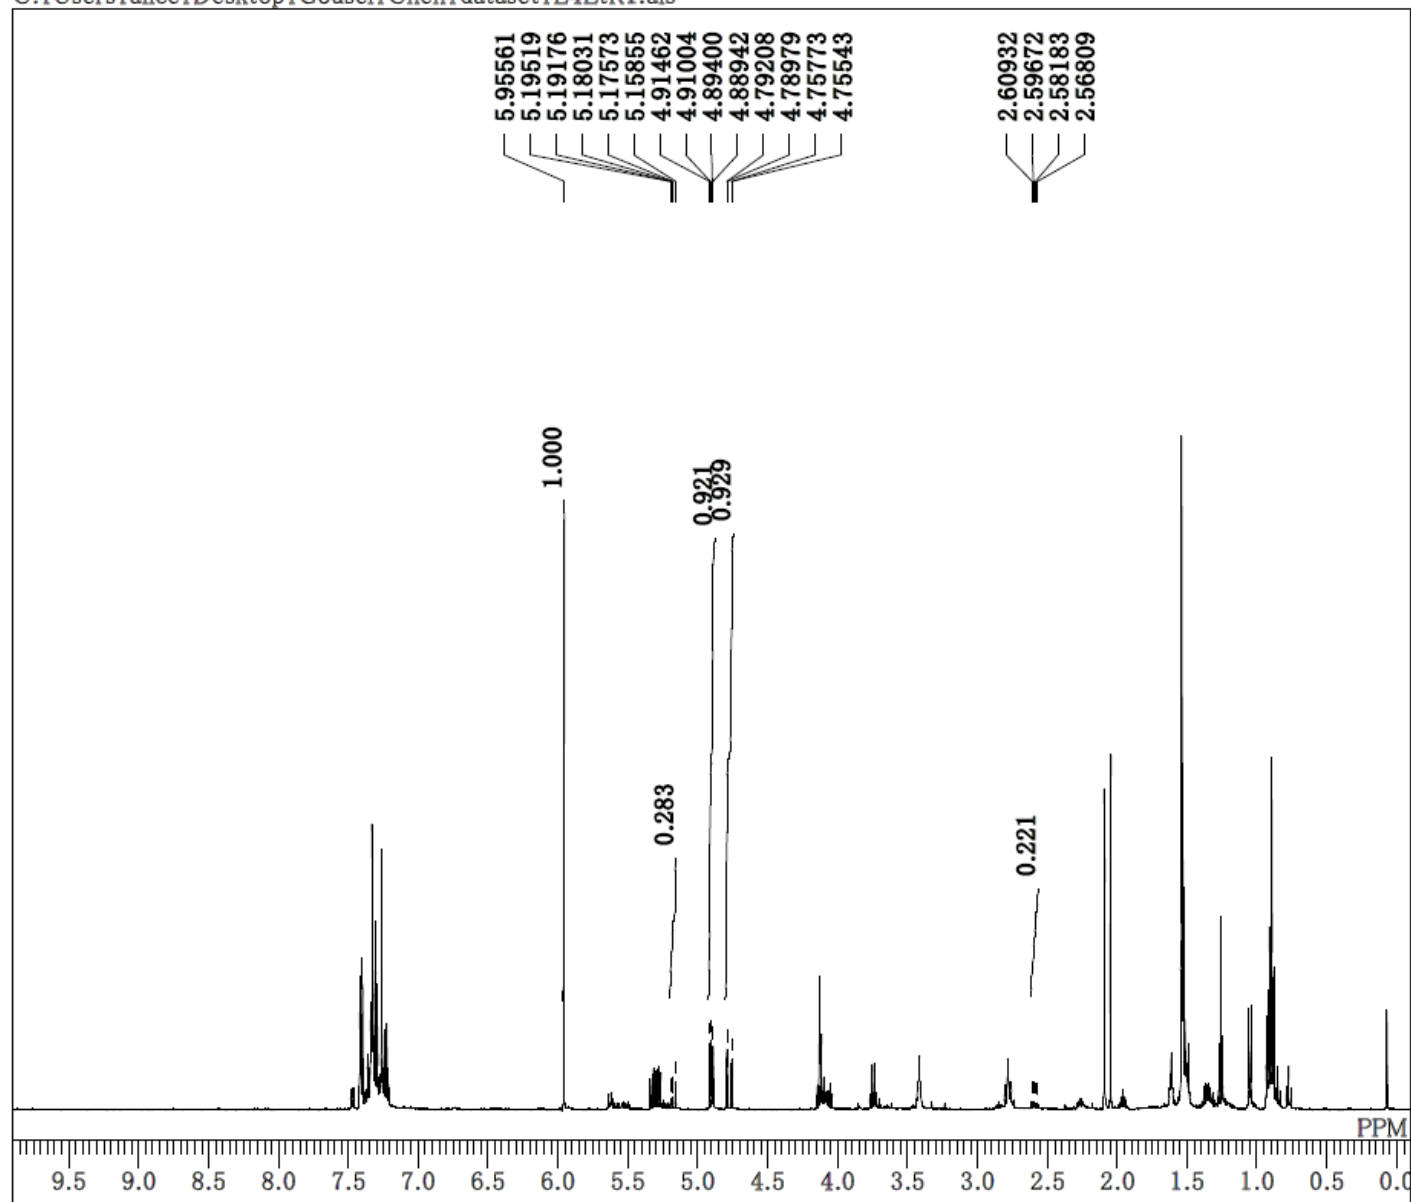

DFILE L4EtR1.als  
 COMNT  
 DATIM 2019-09-28 15:03:15  
 OBNUC 1H  
 EXMOD proton.jxp  
 OBFRQ 500.16 MHz  
 OBSET 2.41 KHz  
 OBFIN 6.01 Hz  
 POINT 13107  
 FREQU 7507.51 Hz  
 SCANS 8  
 ACQTM 1.7459 sec  
 PD 6.0000 sec  
 PW1 5.55 usec  
 IRNUC 1H  
 CTEMP 21.8 c  
 SLVNT CDCL3  
 EXREF 7.26 ppm  
 BF 0.12 Hz  
 RGAIN 40

**L4/1Et, R**  
 (1<sup>st</sup> trial)  
 81%, 6.5/1 dr, 4.8/1 b/l



C:\Users\Valice\Desktop\Gousei\Chen\dataset\L4EtR2.als

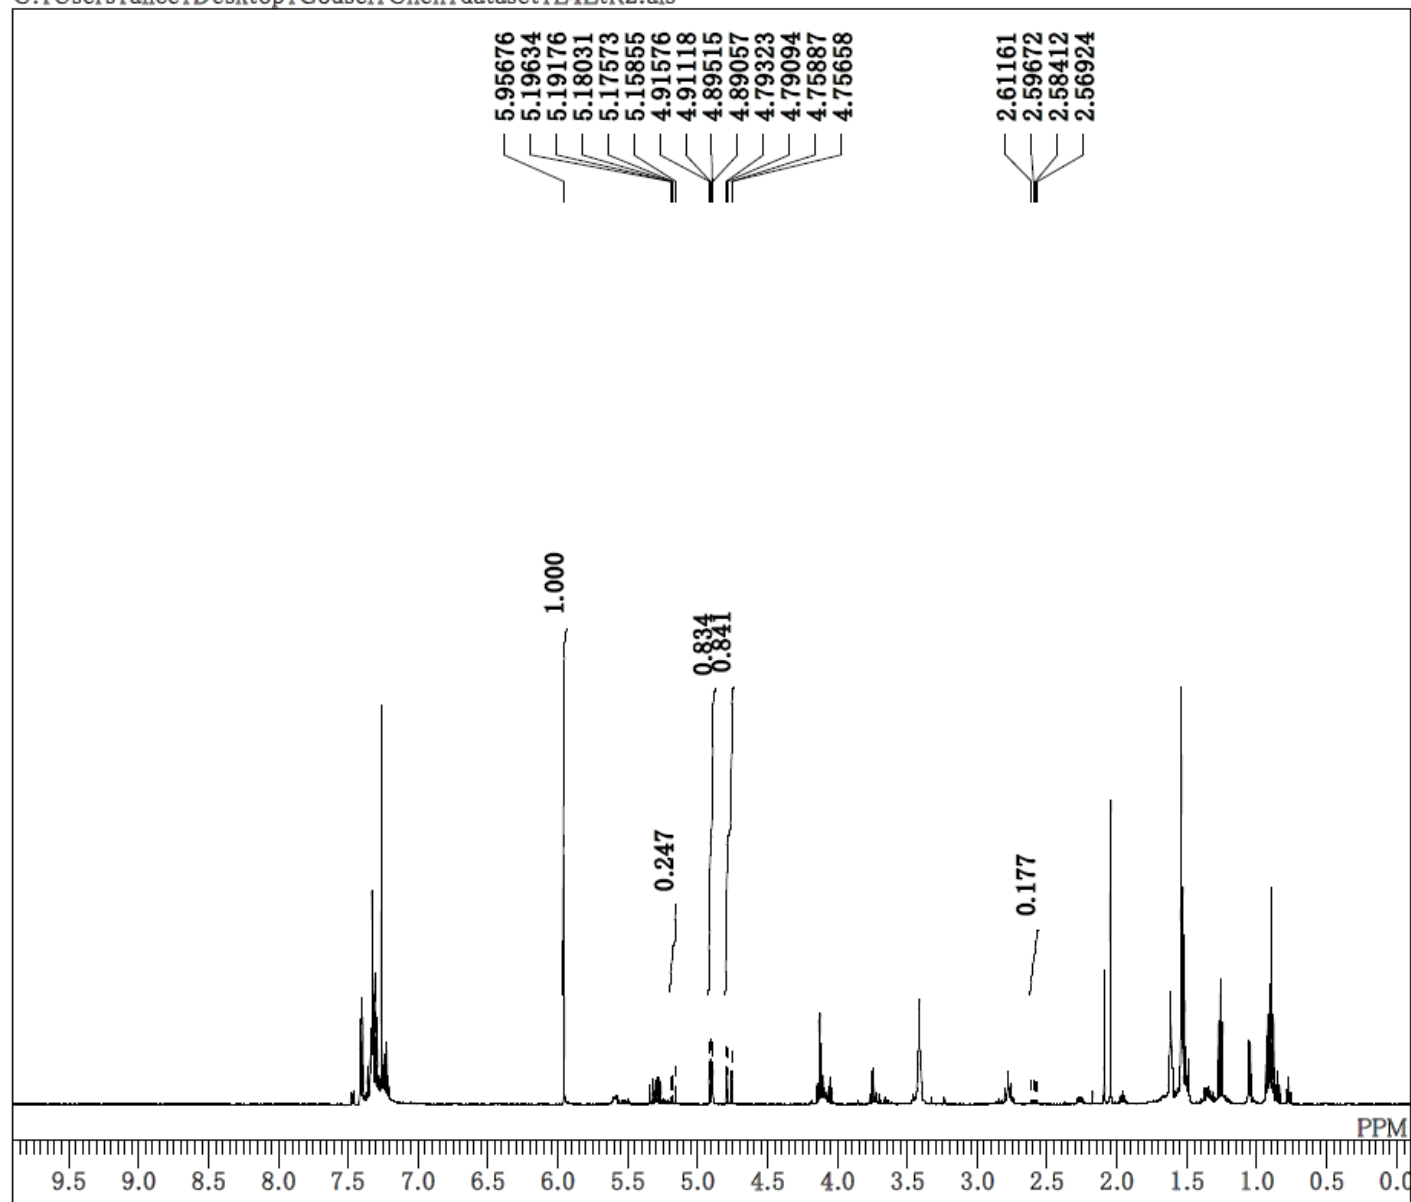

DFILE L4EtR2.als  
 COMNT  
 DATIM 2020-08-28 01:12:12  
 OBNUC 1H  
 EXMOD proton.jxp  
 OBFRQ 500.16 MHz  
 OBSET 2.41 KHz  
 OBFIN 6.01 Hz  
 POINT 13107  
 FREQU 7507.51 Hz  
 SCANS 8  
 ACQTM 1.7459 sec  
 PD 6.0000 sec  
 PW1 5.55 usec  
 IRNUC 1H  
 CTEMP 22.1 c  
 SLVNT CDCL3  
 EXREF 7.26 ppm  
 BF 0.12 Hz  
 RGAIN 42

**L4/1Et, R**  
 (2<sup>nd</sup> trial)  
 72%, 6.8/1 dr, 5.4/1 b/l

C:\Users\Valice\Desktop\Gousei\Chen\dataset\L4PrR1.als

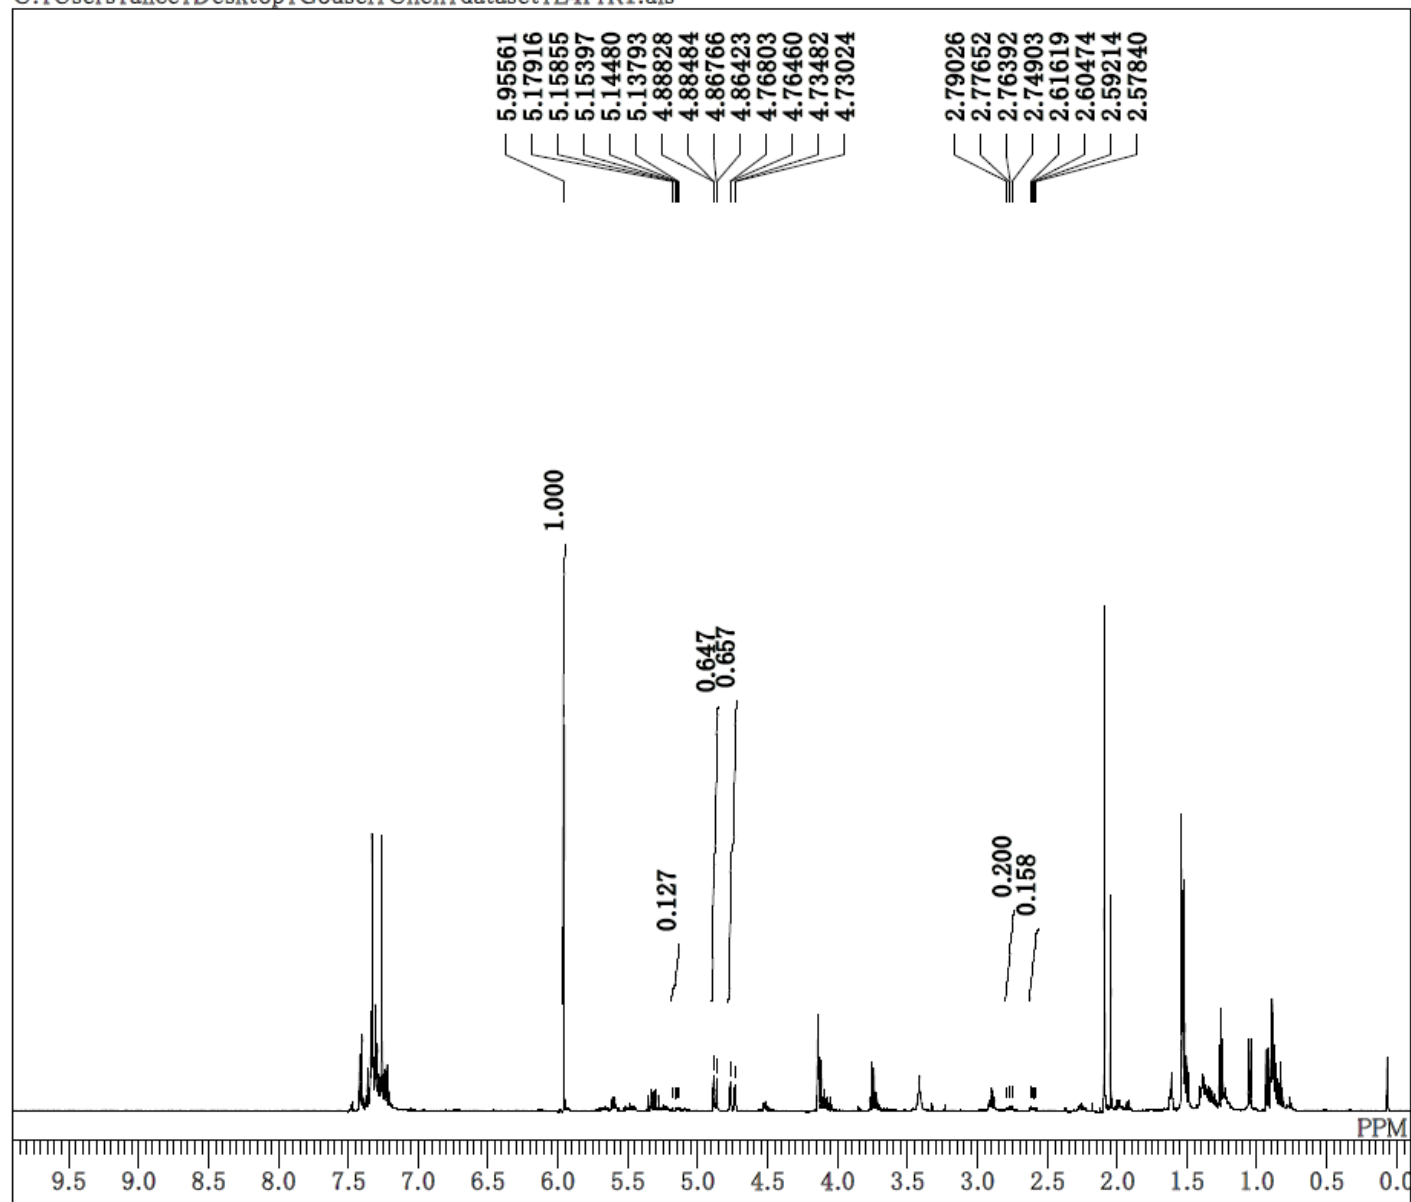

DFILE L4PrR1.als  
 COMNT  
 DATIM 2019-09-28 15:19:42  
 OBNUC 1H  
 EXMOD proton.jxp  
 OBFRQ 500.16 MHz  
 OBSET 2.41 KHz  
 OBFIN 6.01 Hz  
 POINT 13107  
 FREQU 7507.51 Hz  
 SCANS 8  
 ACQTM 1.7459 sec  
 PD 6.0000 sec  
 PW1 5.55 usec  
 IRNUC 1H  
 CTEMP 21.5 c  
 SLVNT CDCL3  
 EXREF 7.26 ppm  
 BF 0.12 Hz  
 RGAIN 42

**L4/1Pr, R**

(1<sup>st</sup> trial)

56%, 10.3/1 dr, 4.0/1 b/l

C:\Users\Valice\Desktop\Gousei\Chen\dataset\L4Pr2.als

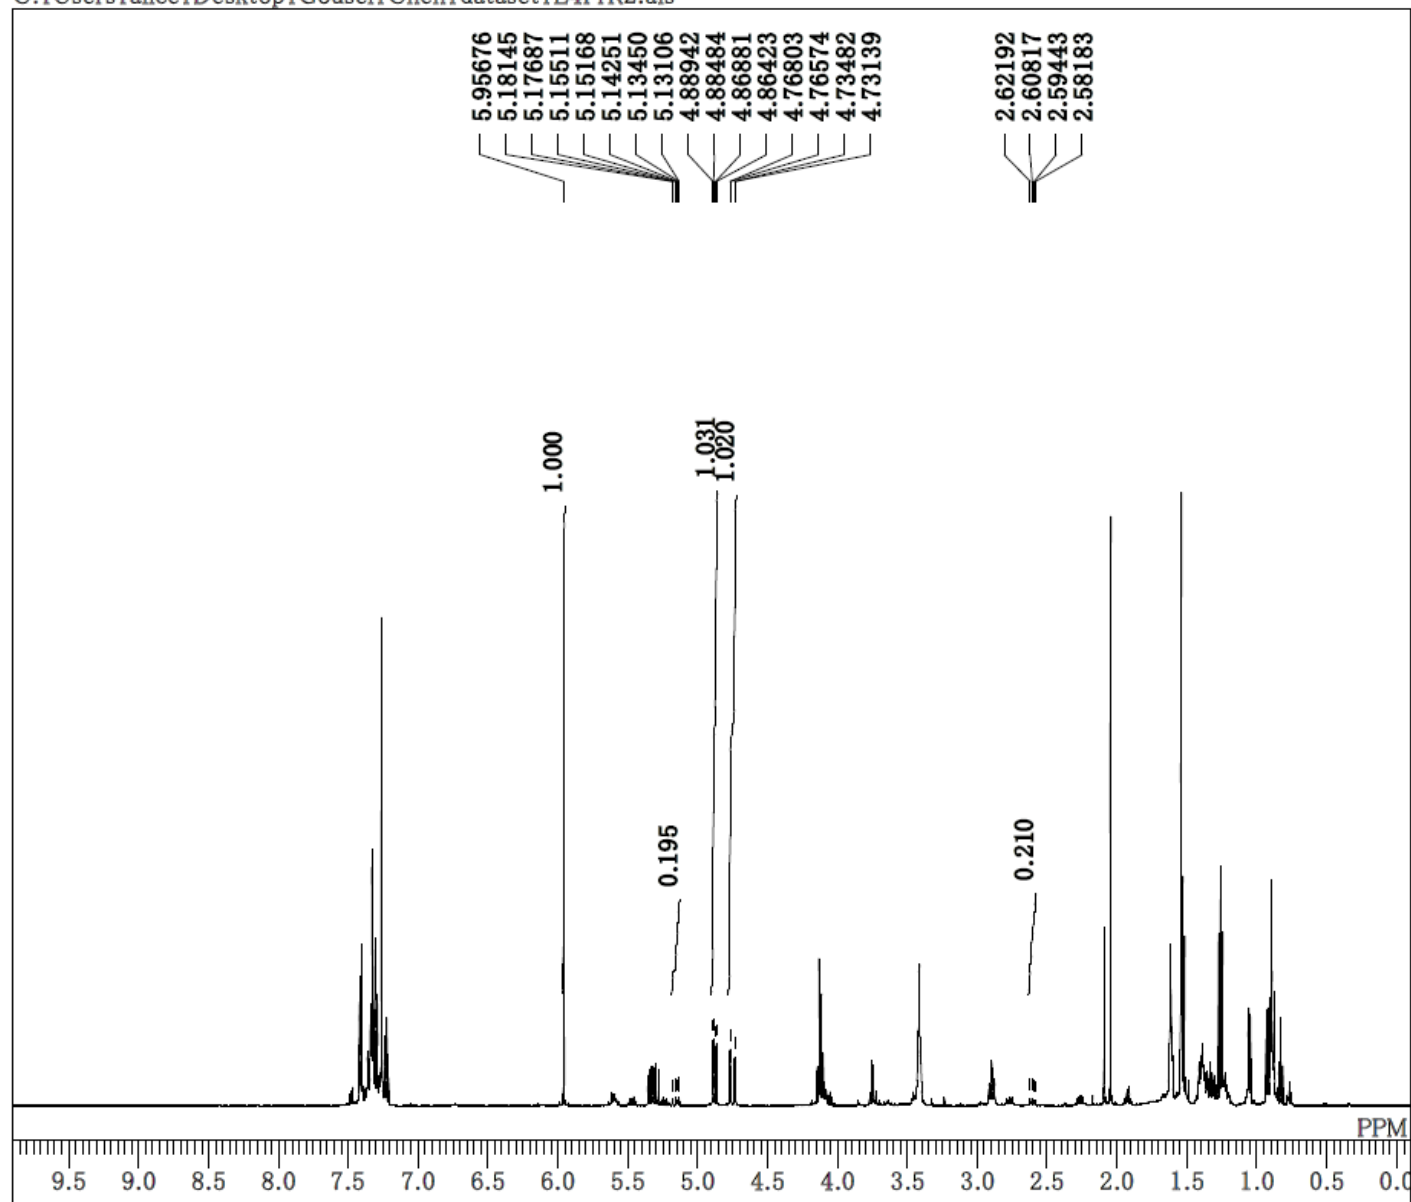

DFILE L4Pr2.als  
 COMNT  
 DATIM 2020-08-28 01:19:43  
 OBNUC 1H  
 EXMOD proton.jxp  
 OBFRQ 500.16 MHz  
 OBSET 2.41 KHz  
 OBFIN 6.01 Hz  
 POINT 13107  
 FREQU 7507.51 Hz  
 SCANS 8  
 ACQTM 1.7459 sec  
 PD 6.0000 sec  
 PW1 5.55 usec  
 IRNUC 1H  
 CTEMP 21.9 c  
 SLVNT CDCL3  
 EXREF 7.26 ppm  
 BF 0.12 Hz  
 RGAIN 42

**L4/1Pr, R**  
 (2<sup>nd</sup> trial)  
 84%, 10.5/1 dr, 5.3/1 b/l

C:\Users\Valice\Desktop\Gousei\Chen\aaaaaaaaaaaa\L5EtR1.als

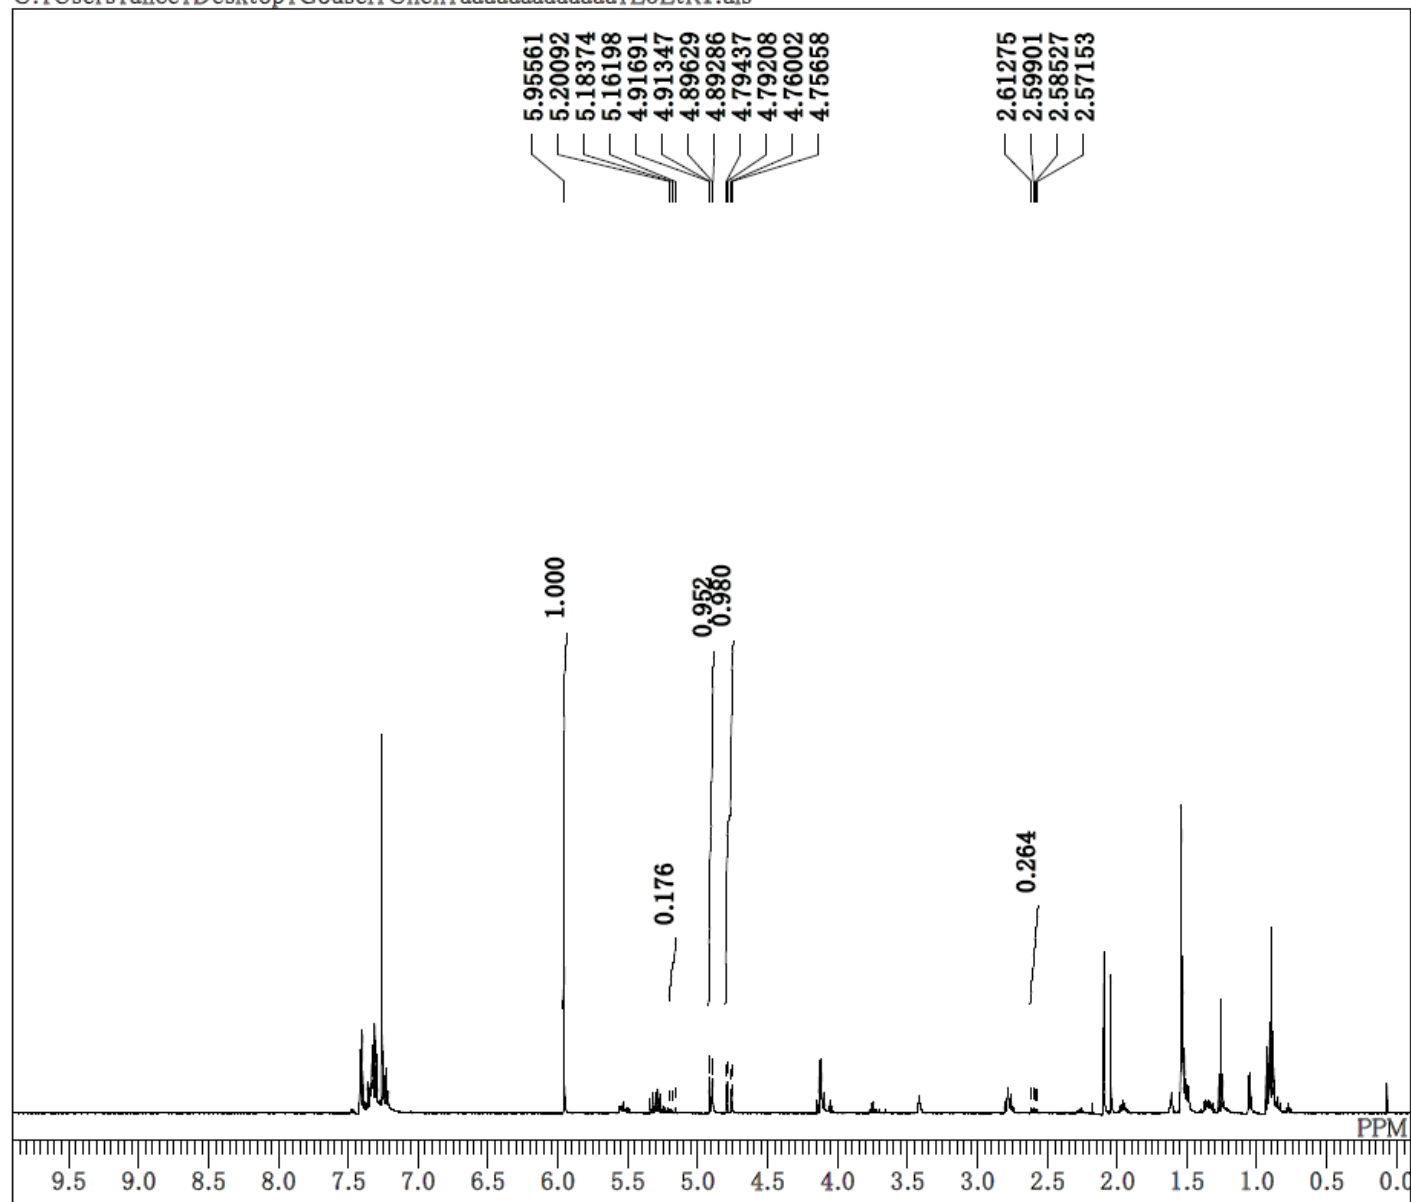

DFILE L5EtR1.als  
COMNT  
DATIM 2018-11-13 15:49:47  
OBNUC 1H  
EXMOD proton.jxp  
OBFRQ 500.16 MHz  
OBSET 2.41 KHz  
OBFIN 6.01 Hz  
POINT 13107  
FREQU 7507.51 Hz  
SCANS 8  
ACQTM 1.7459 sec  
PD 5.0000 sec  
PW1 5.55 usec  
IRNUC 1H  
CTEMP 21.8 c  
SLVNT CDCL3  
EXREF 7.26 ppm  
BF 0.12 Hz  
RGAIN 32

**L5/1Et, R**

(1<sup>st</sup> trial)

83%, 11.0/1 dr, 4.0/1 b/l

C:\Users\Valice\Desktop\Gousei\Chen\dataset\L5EtR2.als

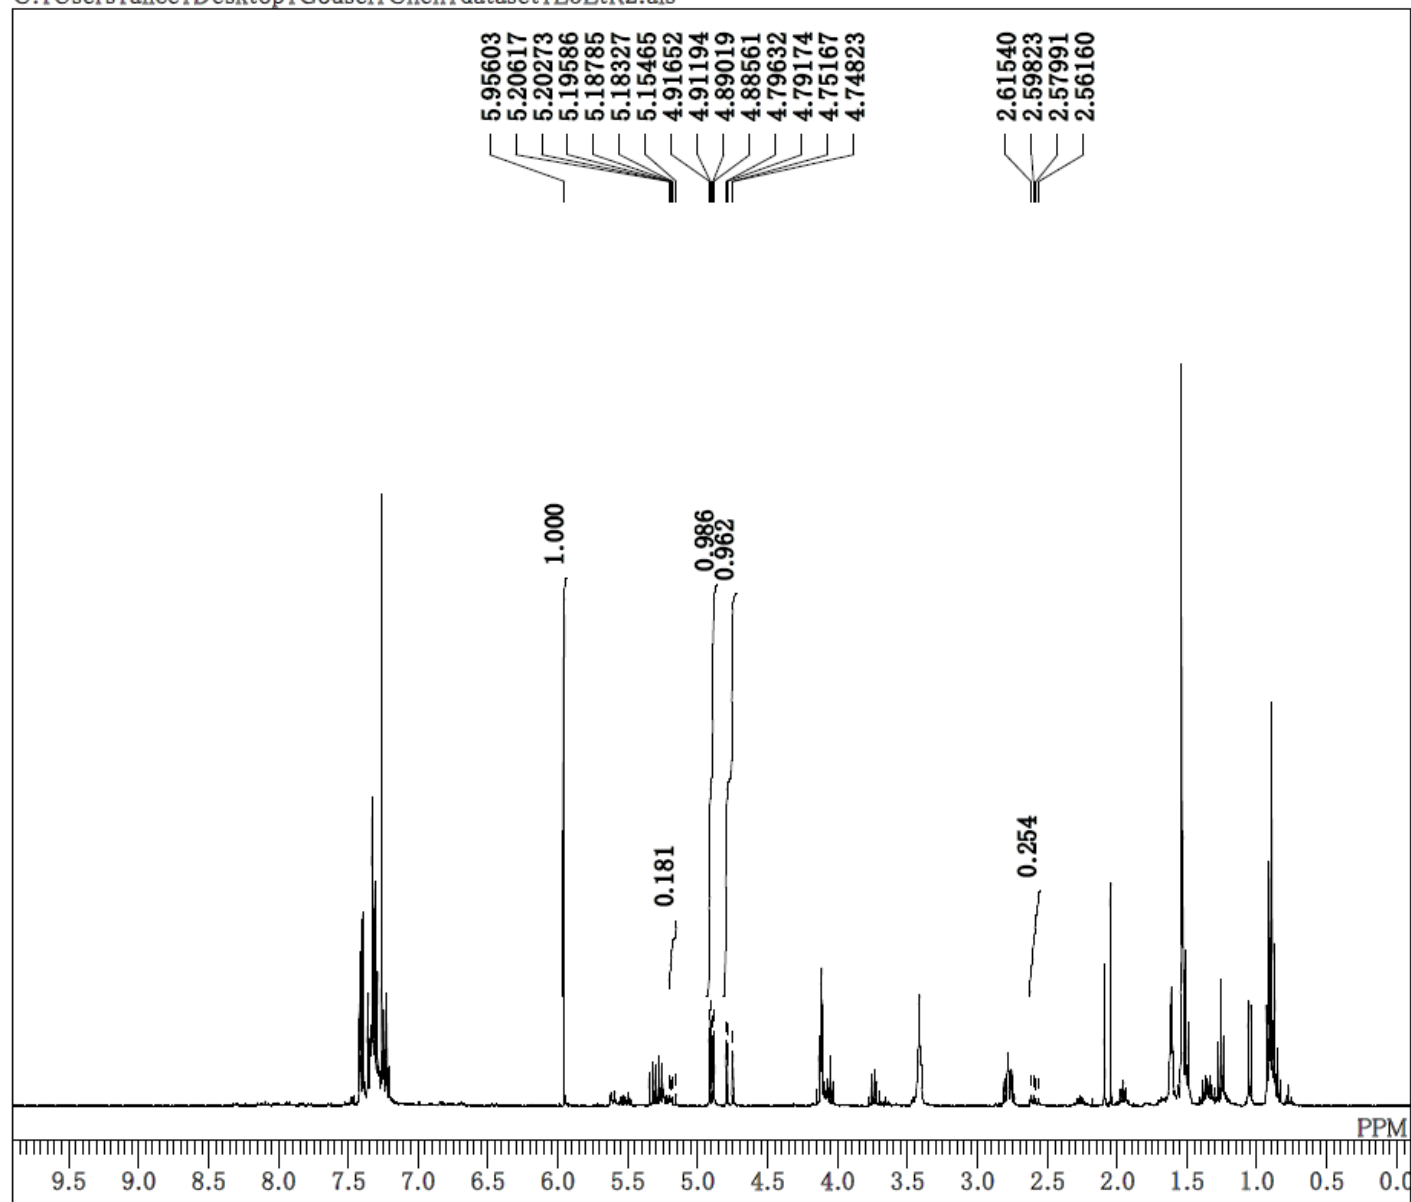

DFILE L5EtR2.als  
 COMNT  
 DATIM 29-08-2020 22:29:18  
 OBNUC 1H  
 EXMOD proton.jxp  
 OBFRQ 391.78 MHz  
 OBSET 8.51 KHz  
 OBFIN 3.34 Hz  
 POINT 13107  
 FREQU 5878.90 Hz  
 SCANS 8  
 ACQTM 2.2295 sec  
 PD 6.0000 sec  
 PW1 5.17 usec  
 IRNUC 1H  
 CTEMP 20.3 c  
 SLVNT CDCL3  
 EXREF 7.26 ppm  
 BF 0.12 Hz  
 RGAIN 40

**L5/1Et, R**

(2<sup>nd</sup> trial)

83%, 10.8/1 dr, 4.2/1 b/l

C:\Users\Valice\Desktop\Gousei\Chen\aaaaaaaaaaaa\L5Pr\_1.als

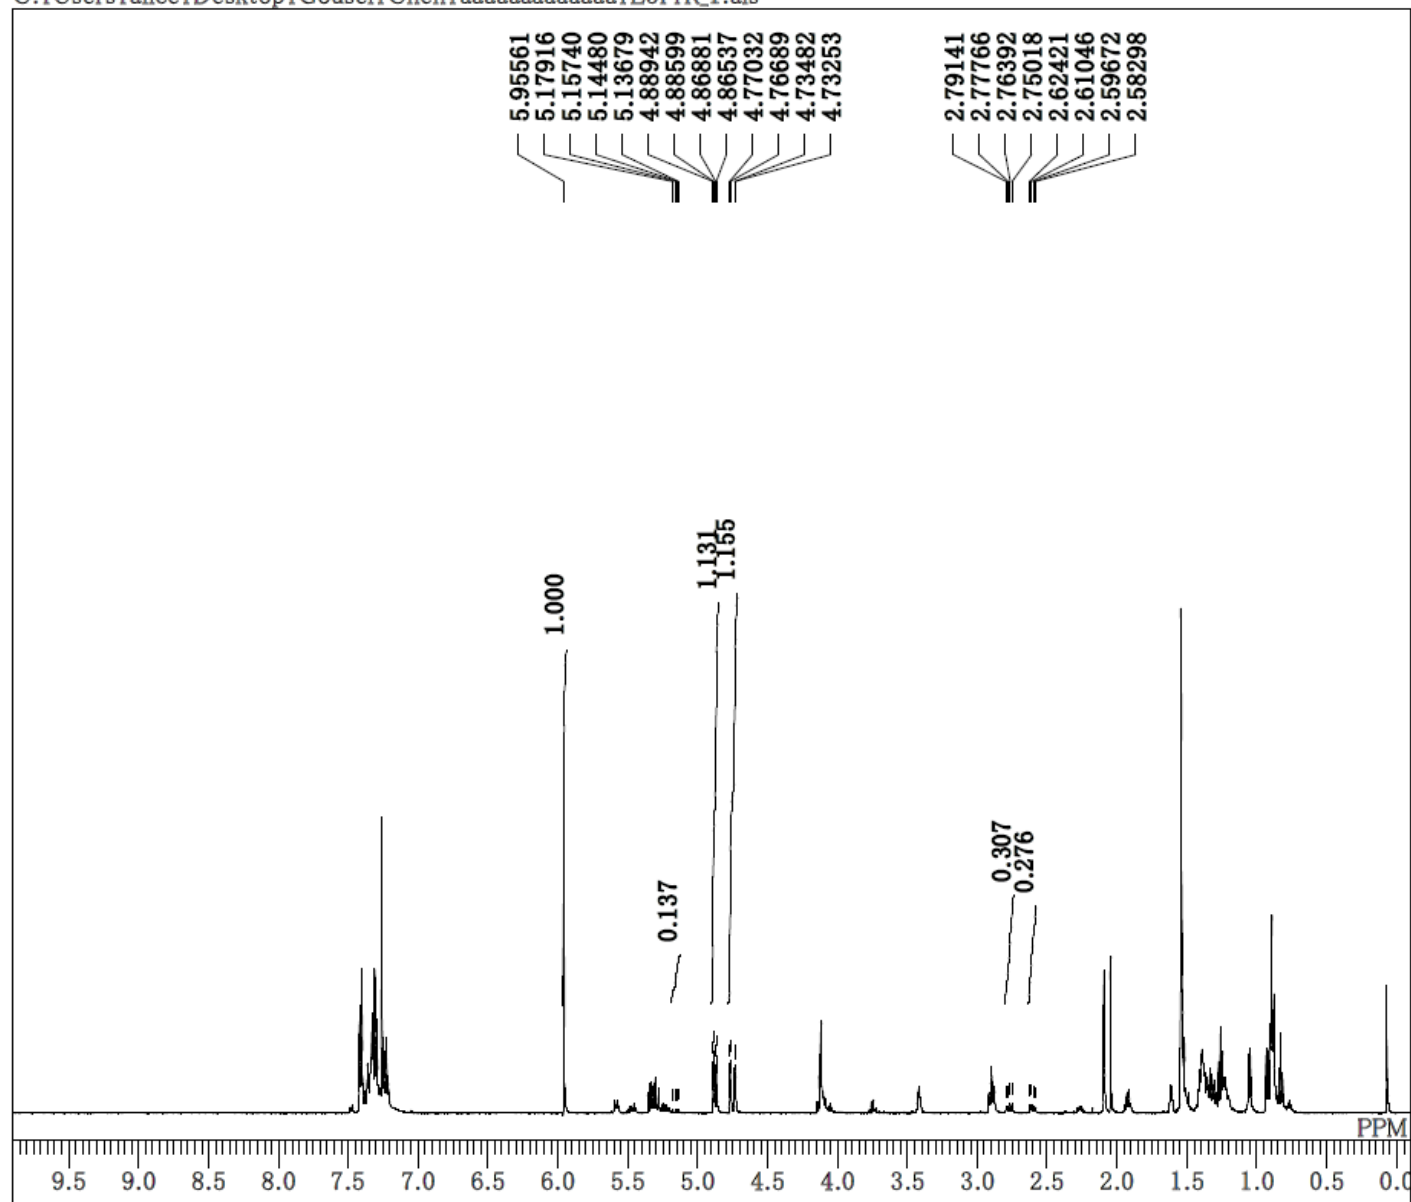

DFILE L5Pr\_1.als  
 COMNT  
 DATIM 2018-11-11 23:26:52  
 OBNUC 1H  
 EXMOD proton.jxp  
 OBFRQ 500.16 MHz  
 OBSET 2.41 KHz  
 OBFIN 6.01 Hz  
 POINT 13107  
 FREQU 7507.51 Hz  
 SCANS 8  
 ACQTM 1.7459 sec  
 PD 5.0000 sec  
 PW1 5.55 usec  
 IRNUC 1H  
 CTEMP 21.9 c  
 SLVNT CDCL3  
 EXREF 7.26 ppm  
 BF 0.12 Hz  
 RGAIN 32

**L5/1Pr, R**

(1<sup>st</sup> trial)

95%, 16.7/1 dr, 4.2/1 b/l

C:\Users\Valice\Desktop\Gousei\Chen\dataset\L5PrR2.als

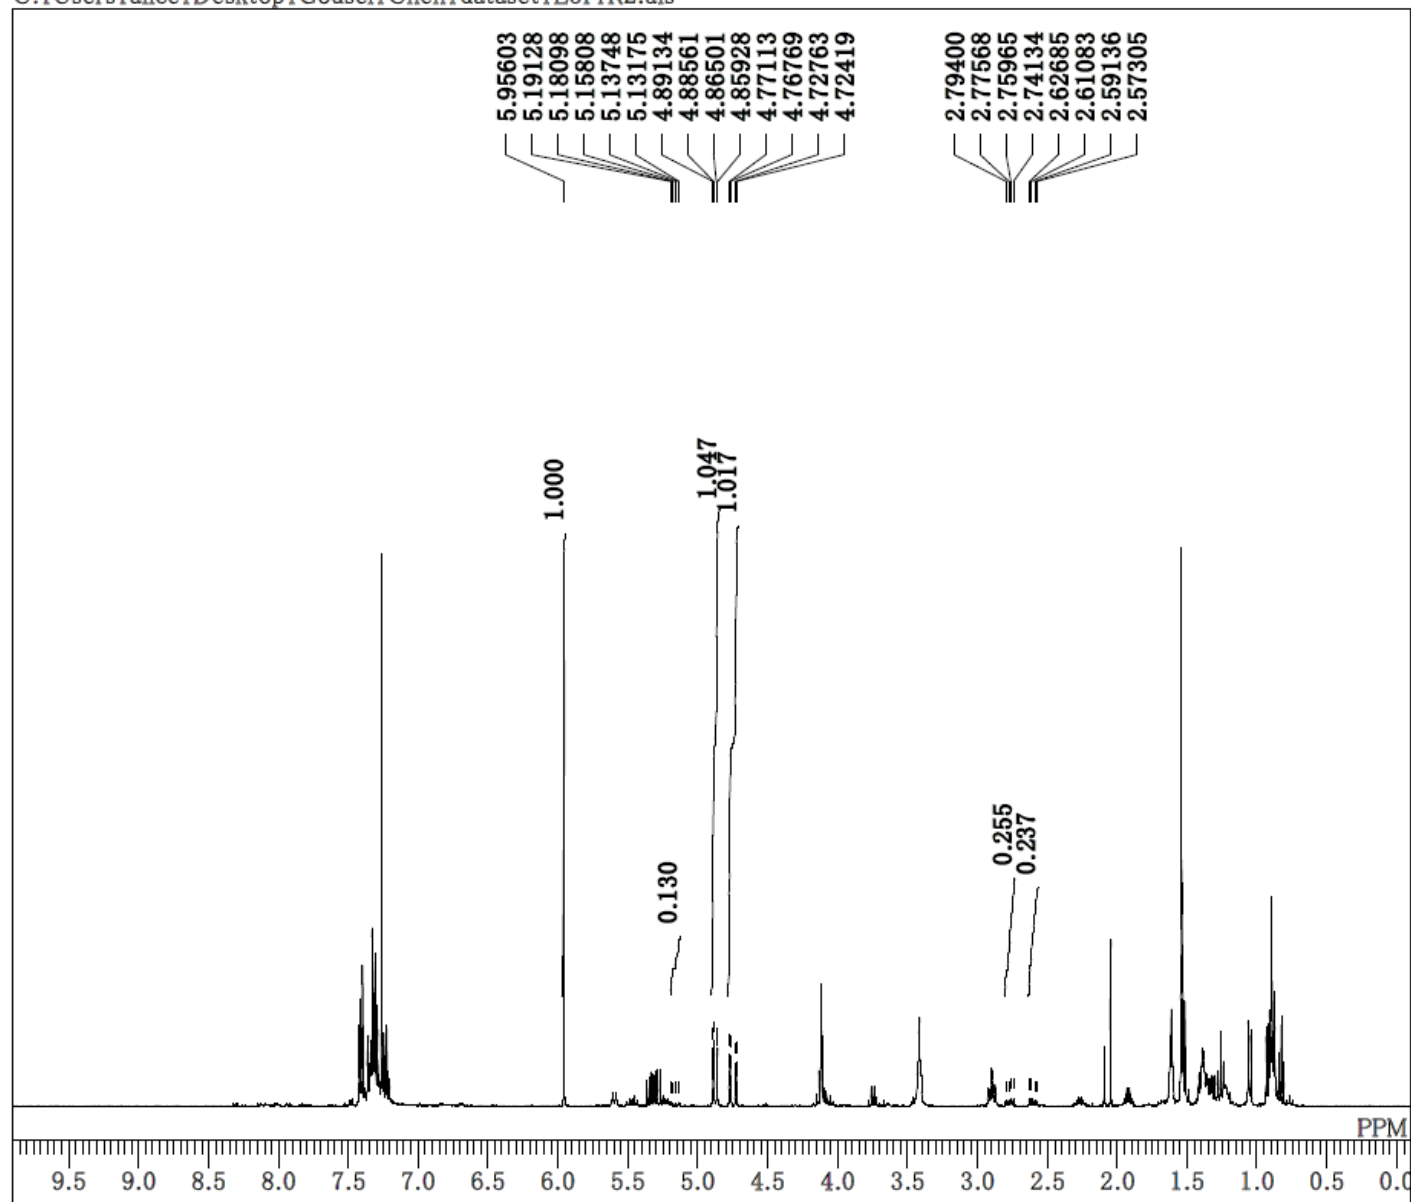

DFILE L5PrR2.als  
COMNT  
DATIM 29-08-2020 22:37:03  
OBNUC 1H  
EXMOD proton.jxp  
OBFRQ 391.78 MHz  
OBSET 8.51 KHz  
OBFIN 3.34 Hz  
POINT 13107  
FREQU 5878.90 Hz  
SCANS 8  
ACQTM 2.2295 sec  
PD 6.0000 sec  
PW1 5.17 usec  
IRNUC 1H  
CTEMP 20.3 c  
SLVNT CDCL3  
EXREF 7.26 ppm  
BF 0.12 Hz  
RGAIN 40

**L5/1Pr, R**  
(2<sup>nd</sup> trial)  
85%, 15.9/1 dr, 4.5/1 b/l

C:\Users\Valice\Desktop\Gousei\Chen\dataset\L6EtR1.als

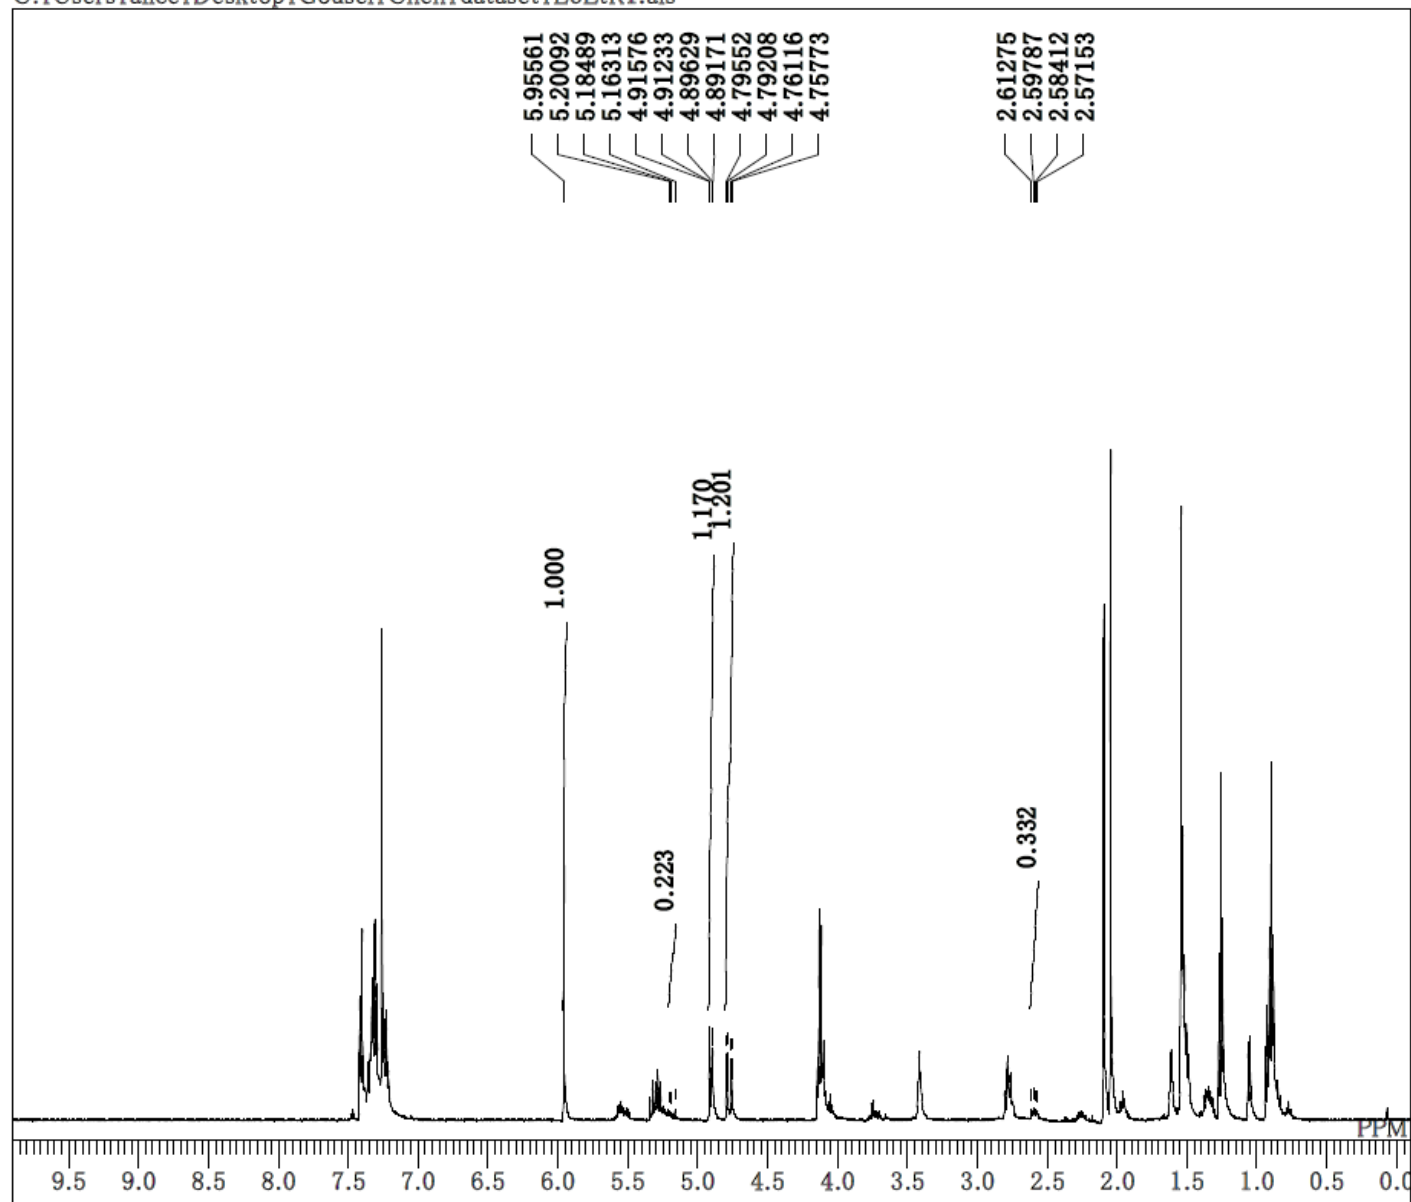

DFILE L6EtR1.als  
 COMNT  
 DATIM 2018-11-23 13:19:34  
 OBNUC 1H  
 EXMOD proton.jxp  
 OBFRQ 500.16 MHz  
 OBSET 2.41 KHz  
 OBFIN 6.01 Hz  
 POINT 13107  
 FREQU 7507.51 Hz  
 SCANS 8  
 ACQTM 1.7459 sec  
 PD 5.0000 sec  
 PW1 5.55 usec  
 IRNUC 1H  
 CTEMP 21.8 c  
 SLVNT CDCL3  
 EXREF 7.26 ppm  
 BF 0.12 Hz  
 RGAIN 32

**L6/1Et, R**  
 (1<sup>st</sup> trial)  
 100%, 10.6/1 dr, 3.9/1 b/l



C:\Users\Valice\Desktop\Gousei\Chen\dataset\L6EtR2.als

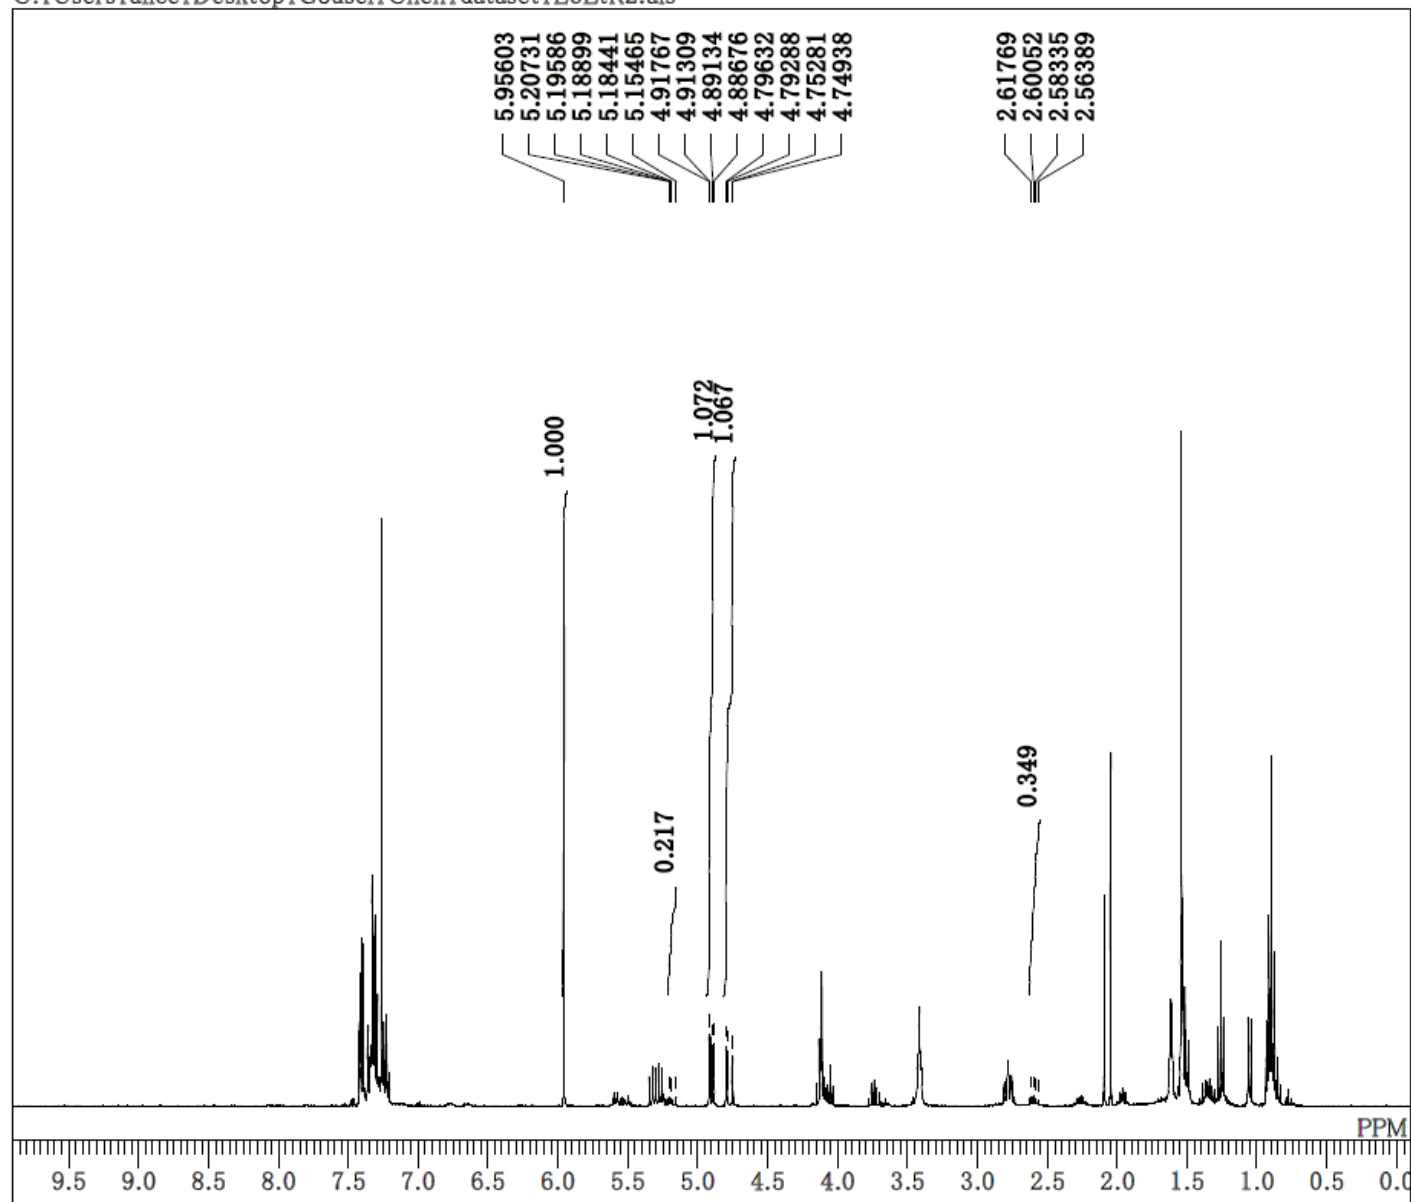

DFILE L6EtR2.als  
COMNT  
DATIM 04-09-2020 01:43:34  
OBNUC 1H  
EXMOD proton.jxp  
OBFRQ 391.78 MHz  
OBSET 8.51 KHz  
OBFIN 3.34 Hz  
POINT 13107  
FREQU 5878.90 Hz  
SCANS 8  
ACQTM 2.2295 sec  
PD 6.0000 sec  
PW1 5.17 usec  
IRNUC 1H  
CTEMP 21.0 c  
SLVNT CDCL3  
EXREF 7.26 ppm  
BF 0.12 Hz  
RGAIN 40

**L6/1Et, R**

(2<sup>nd</sup> trial)

96%, 9.9/1 dr, 3.4/1 b/l

C:\Users\alice\Desktop\Gousei\Chen\dataset\L6PrR1.als

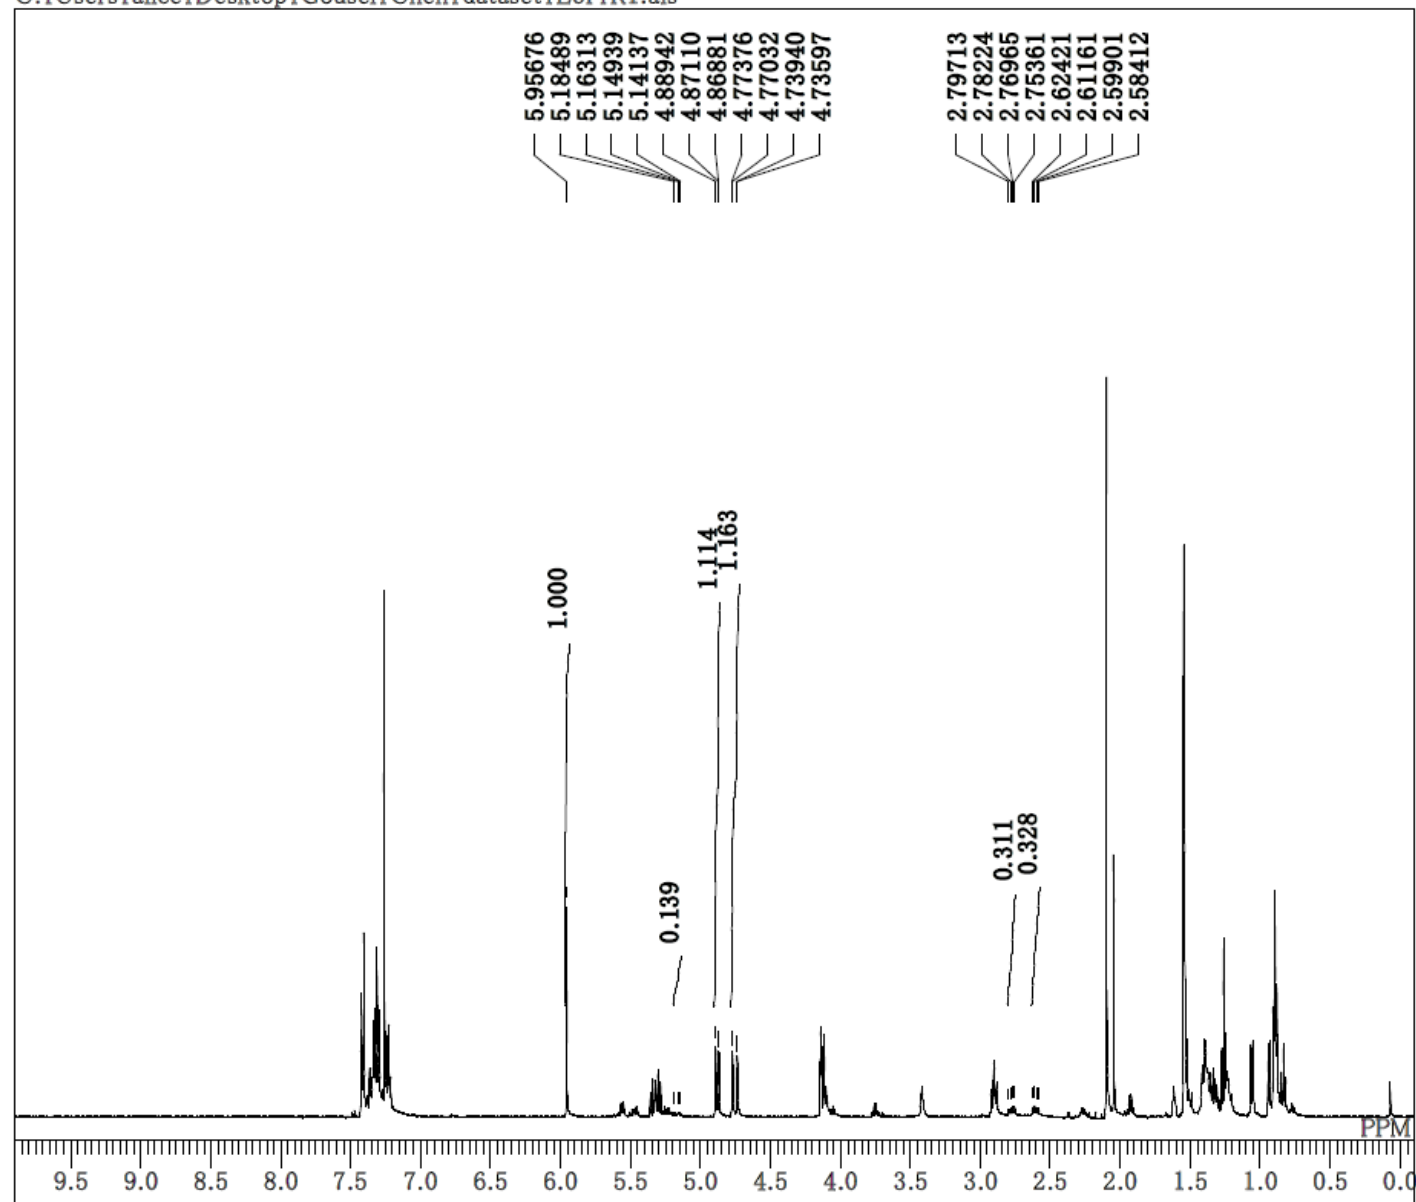

DFILE L6PrR1.als  
 COMNT  
 DATIM 2018-11-21 15:45:11  
 OBNUC 1H  
 EXMOD proton.jxp  
 OBFRQ 500.16 MHz  
 OBSET 2.41 KHz  
 OBFIN 6.01 Hz  
 POINT 13107  
 FREQU 7507.51 Hz  
 SCANS 8  
 ACQTM 1.7459 sec  
 PD 5.0000 sec  
 PW1 5.55 usec  
 IRNUC 1H  
 CTEMP 22.0 c  
 SLVNT CDCL3  
 EXREF 7.26 ppm  
 BF 0.12 Hz  
 RGAIN 32

**L6/1Pr, R**

(1<sup>st</sup> trial)

96%, 16.4/1 dr, 3.8/1 b/l

C:\Users\alice\Desktop\Gousei\Chen\dataset\L6PrR2.als

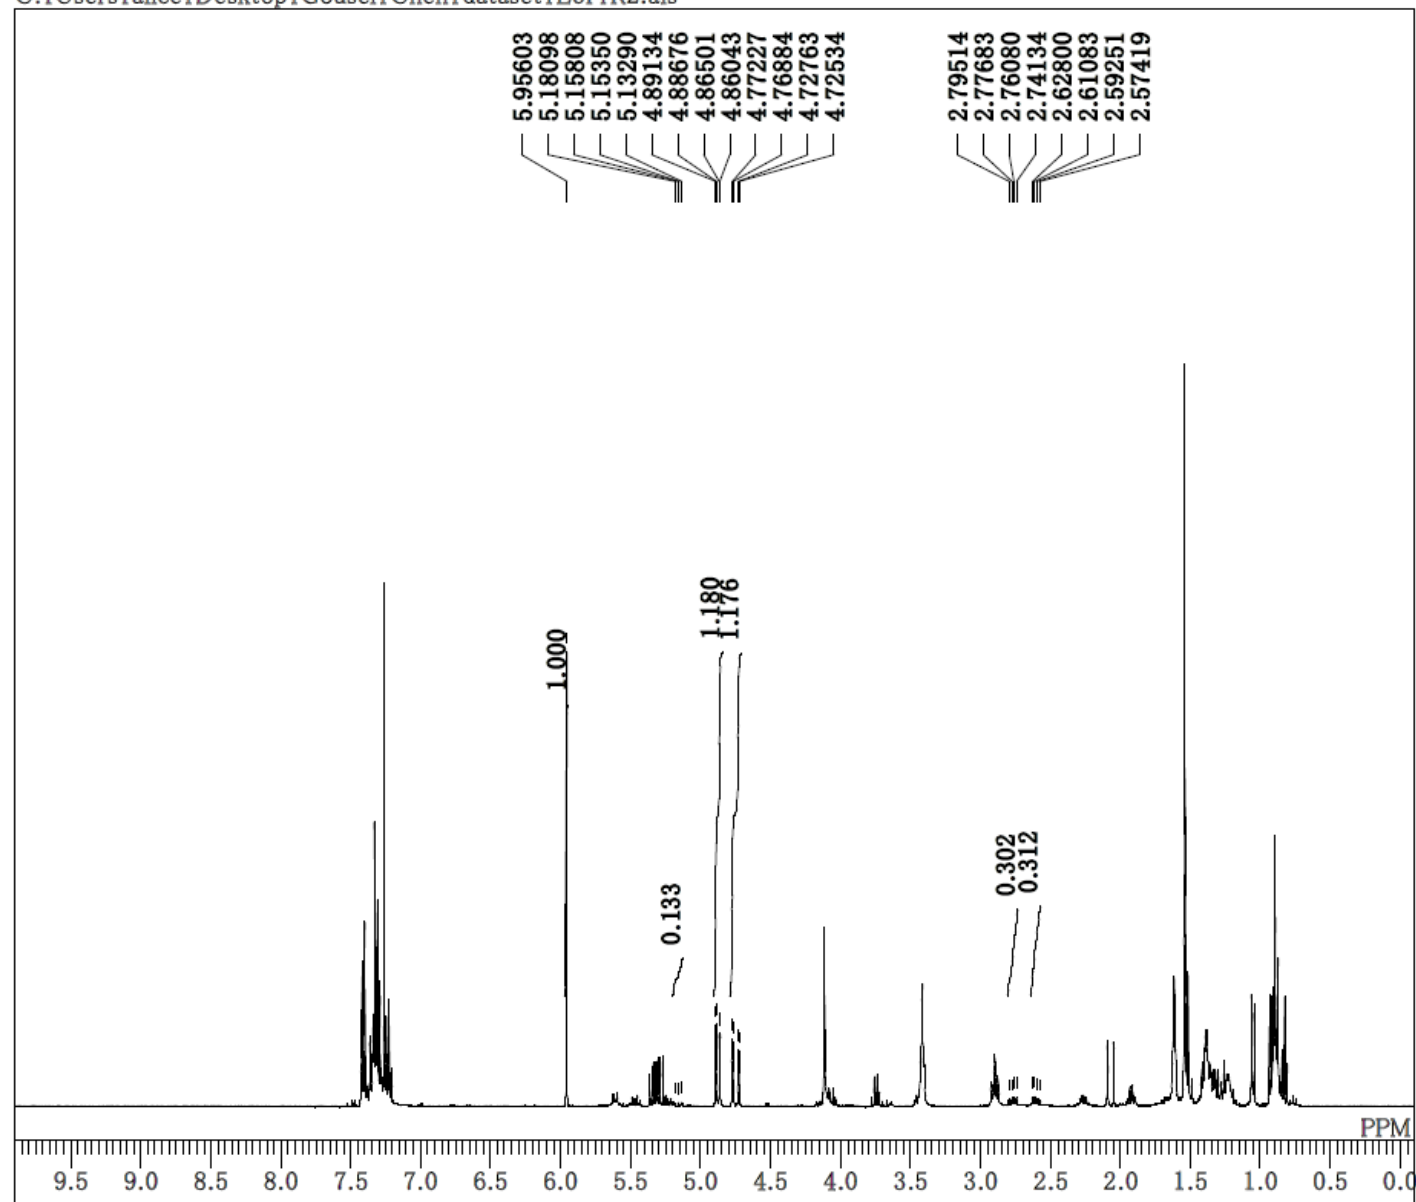

DFILE L6PrR2.als  
 COMNT  
 DATIM 04-09-2020 01:53:27  
 OBNUC 1H  
 EXMOD proton.jxp  
 OBFRQ 391.78 MHz  
 OBSET 8.51 KHz  
 OBFIN 3.34 Hz  
 POINT 13107  
 FREQU 5878.90 Hz  
 SCANS 8  
 ACQTM 2.2295 sec  
 PD 6.0000 sec  
 PW1 5.17 usec  
 IRNUC 1H  
 CTEMP 20.9 c  
 SLVNT CDCL3  
 EXREF 7.26 ppm  
 BF 0.12 Hz  
 RGAIN 38

**L6/1Pr, R**

(2<sup>nd</sup> trial)

98%, 17.7/1 dr, 4.1/1 b/l

C:\Users\Valice\Desktop\Gousei\Chen\aaaaaaaaaaaa\L7EtR1.als

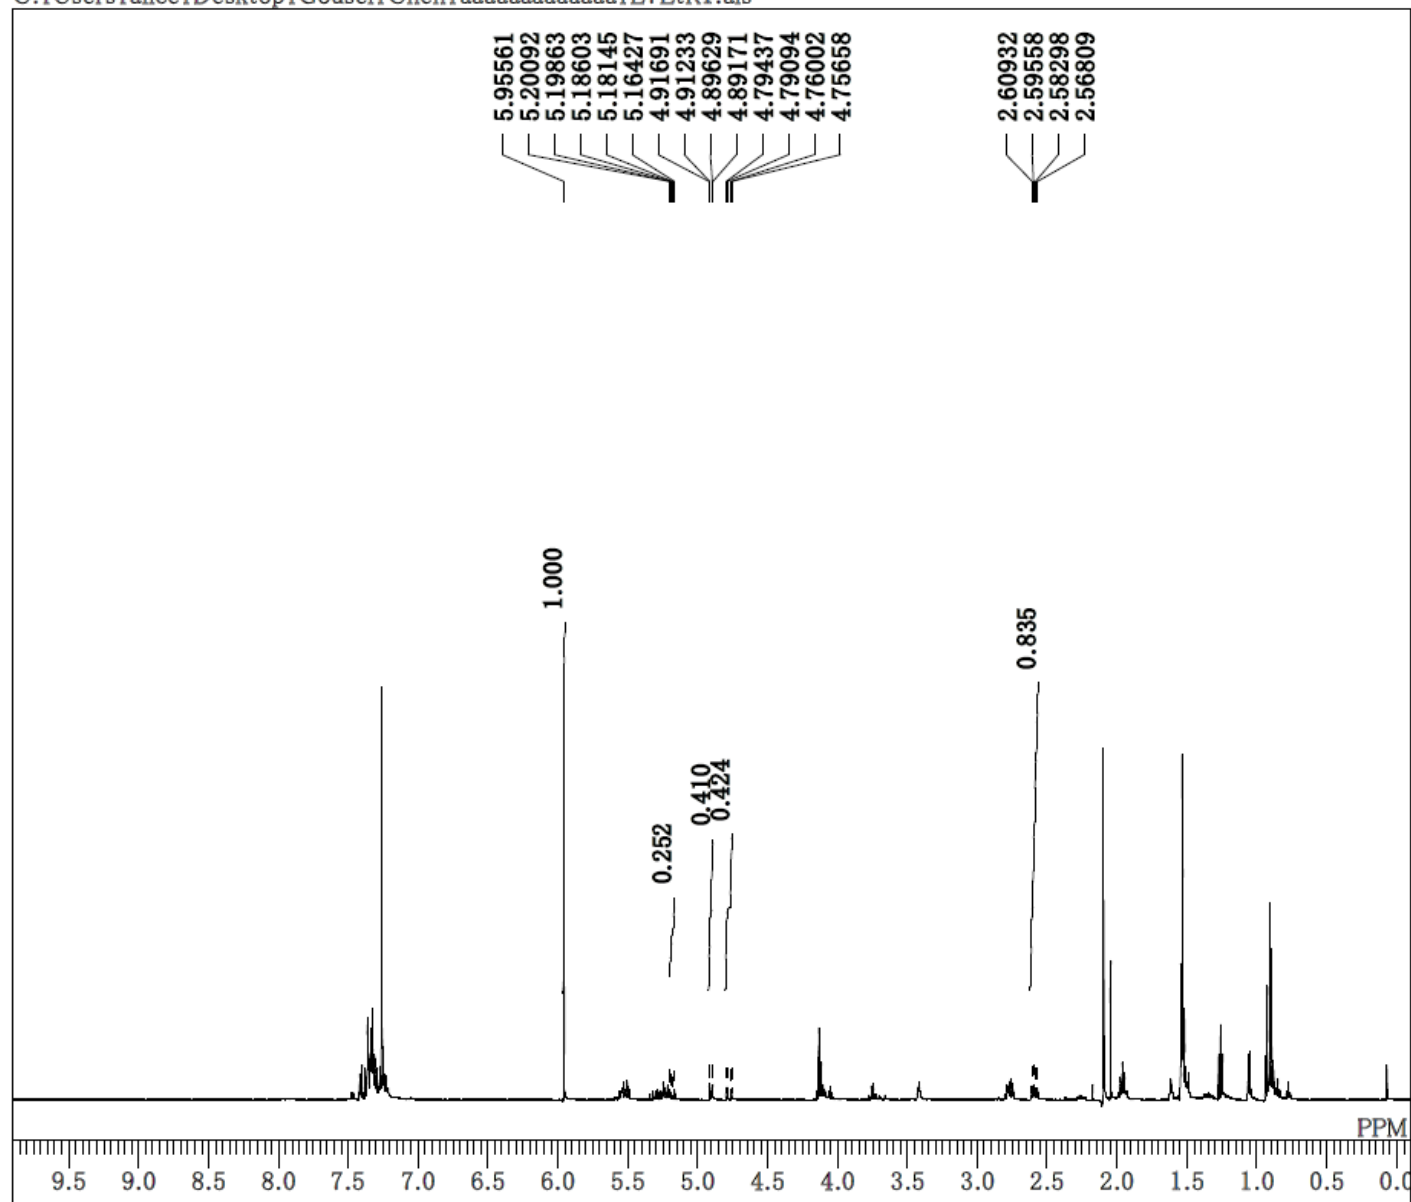

DFILE L7EtR1.als  
 COMNT  
 DATIM 2018-11-13 16:08:38  
 OBNUC 1H  
 EXMOD proton.jxp  
 OBFRQ 500.16 MHz  
 OBSET 2.41 KHz  
 OBFIN 6.01 Hz  
 POINT 13107  
 FREQU 7507.51 Hz  
 SCANS 8  
 ACQTM 1.7459 sec  
 PD 5.0000 sec  
 PW1 5.55 usec  
 IRNUC 1H  
 CTEMP 21.6 c  
 SLVNT CDCL3  
 EXREF 7.26 ppm  
 BF 0.12 Hz  
 RGAIN 32

**L7/1Et, R**

(1<sup>st</sup> trial)

87%, 3.2/1 dr, 1/1.5 b/l

C:\Users\Valice\Desktop\Gousei\Chen\dataset\L7EtR2.als

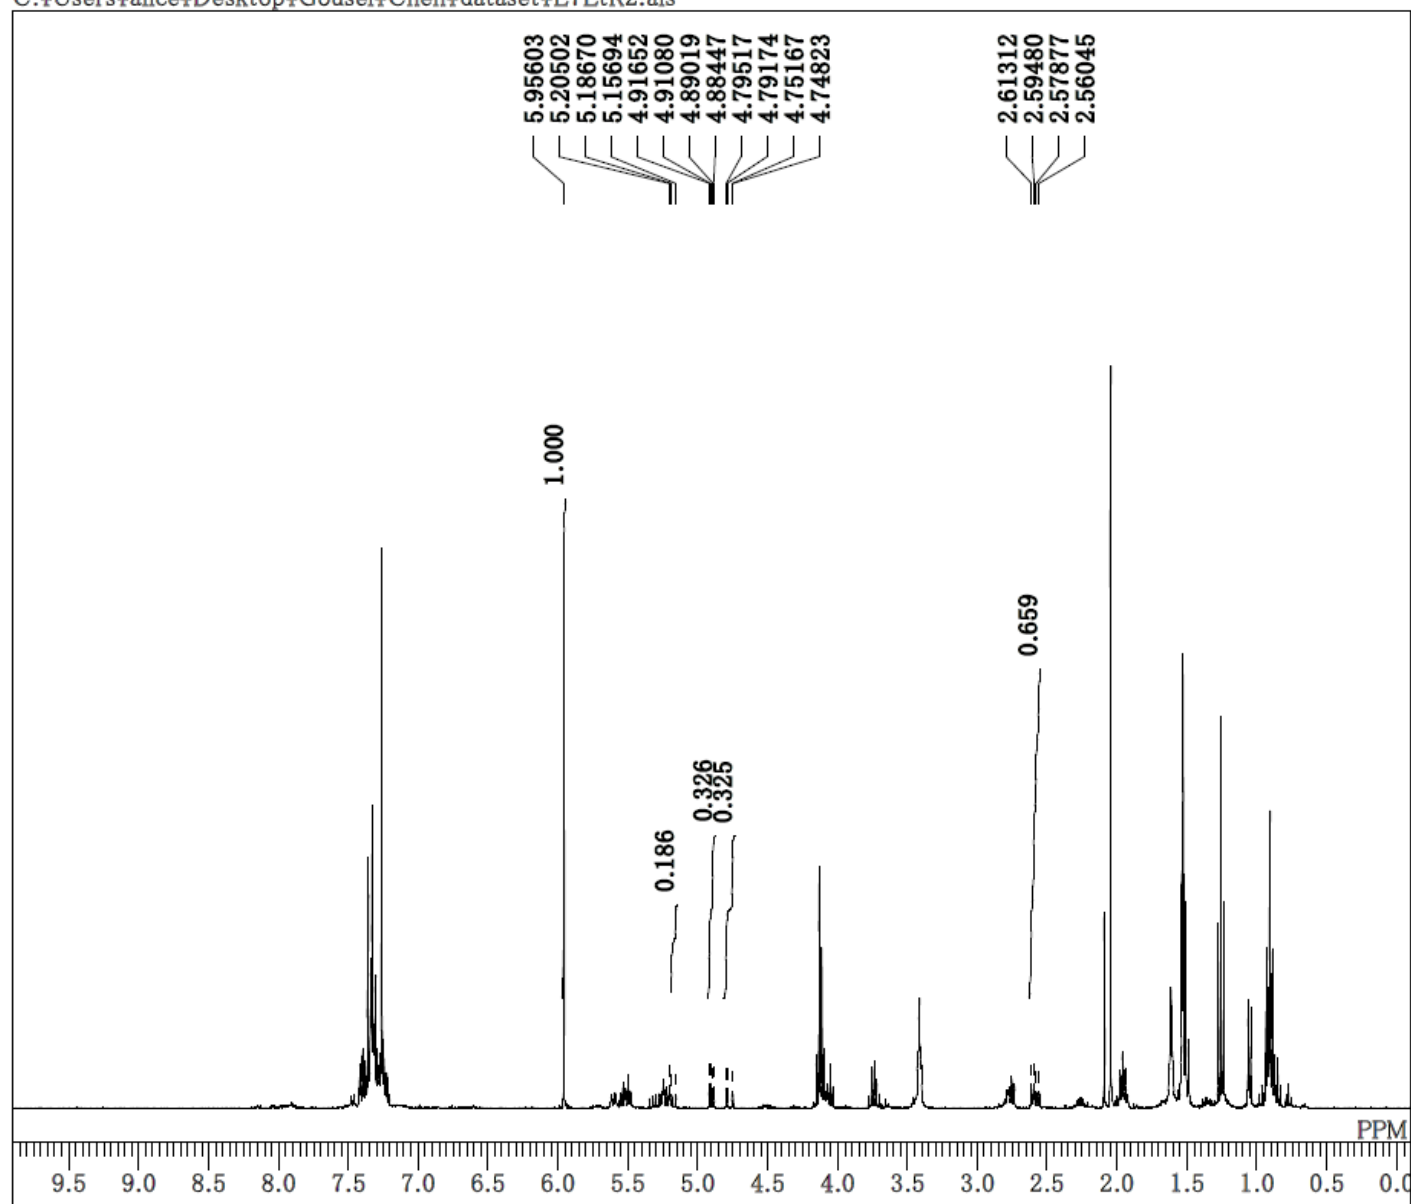

DFILE L7EtR2.als  
 COMNT  
 DATIM 29-08-2020 23:00:39  
 OBNUC 1H  
 EXMOD proton.jxp  
 OBFRQ 391.78 MHz  
 OBSET 8.51 KHz  
 OBFIN 3.34 Hz  
 POINT 13107  
 FREQU 5878.90 Hz  
 SCANS 8  
 ACQTM 2.2295 sec  
 PD 6.0000 sec  
 PW1 5.17 usec  
 IRNUC 1H  
 CTEMP 20.6 c  
 SLVNT CDCL3  
 EXREF 7.26 ppm  
 BF 0.12 Hz  
 RGAIN 40

**L7/1Et, R**

(2<sup>nd</sup> trial)

68%, 3.5/1 dr, 1/1.6 b/l

C:\Users\Valice\Desktop\Gousei\Chen\aaaaaaaaaaaa\L7PrR1.als

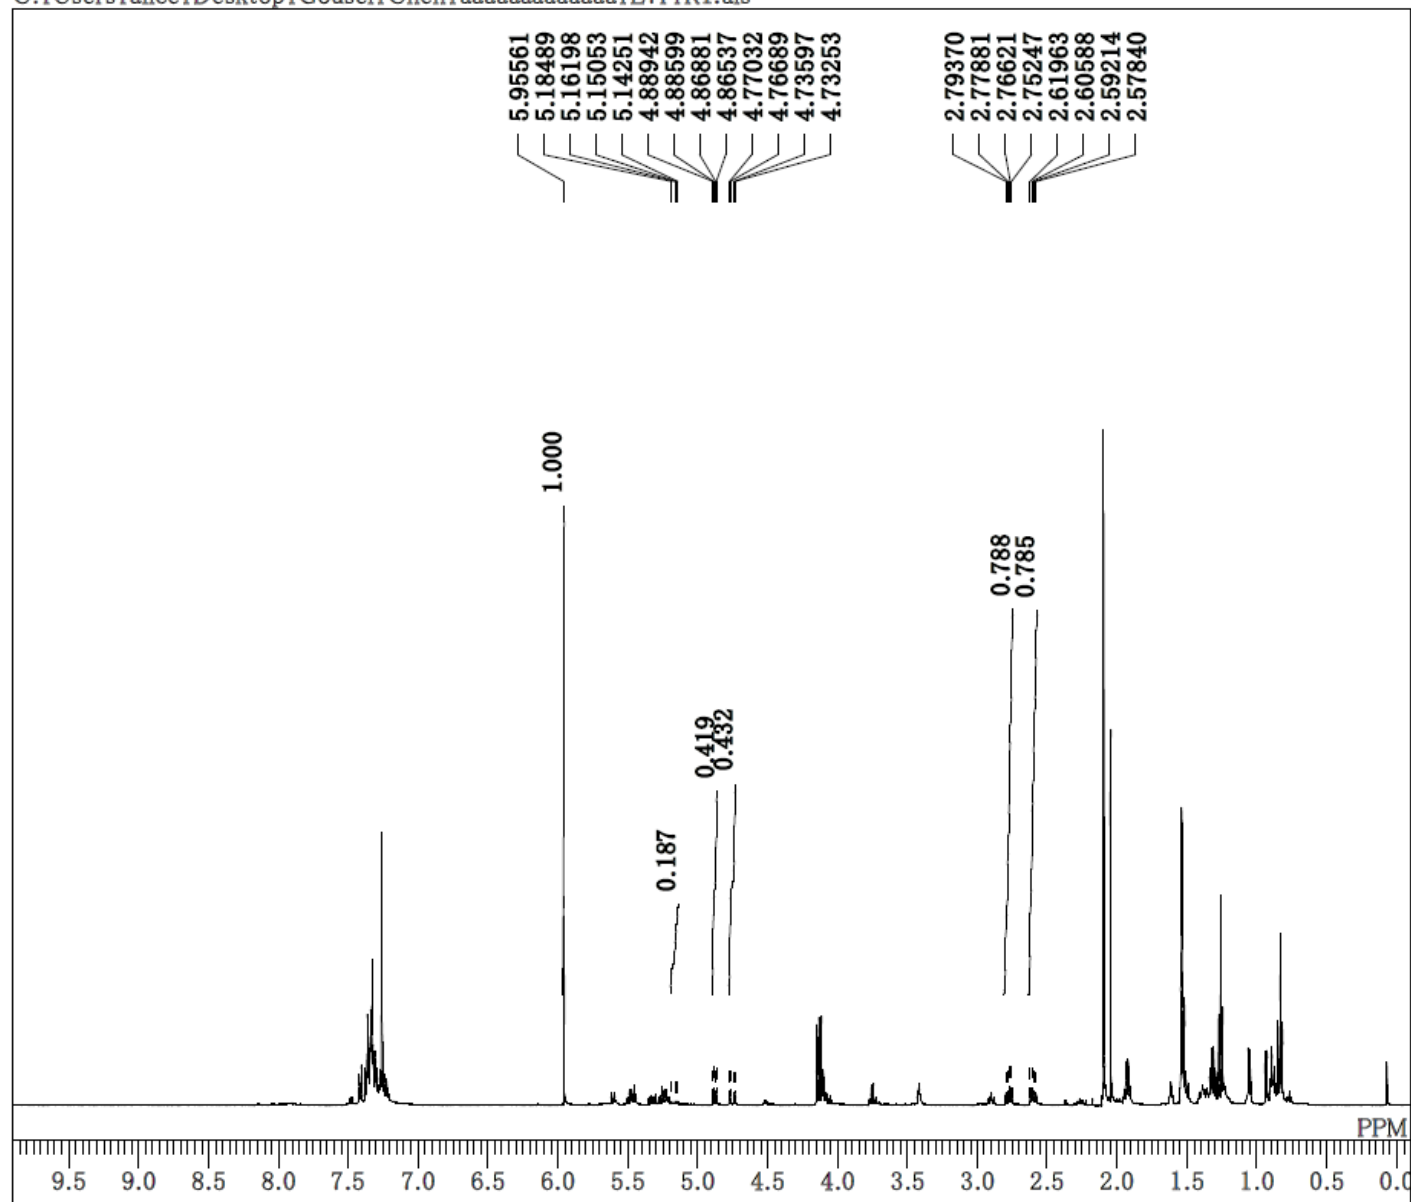

DFILE L7PrR1.als  
 COMNT  
 DATIM 2018-11-11 23:09:18  
 OBNUC 1H  
 EXMOD proton.jxp  
 OBFRQ 500.16 MHz  
 OBSET 2.41 KHz  
 OBFIN 6.01 Hz  
 POINT 13107  
 FREQU 7507.51 Hz  
 SCANS 8  
 ACQTM 1.7459 sec  
 PD 5.0000 sec  
 PW1 5.55 usec  
 IRNUC 1H  
 CTEMP 21.7 c  
 SLVNT CDCL3  
 EXREF 7.26 ppm  
 BF 0.12 Hz  
 RGAIN 32

**L7/1Pr, R**  
 (1<sup>st</sup> trial)  
 82%, 4.6/1 dr, 1/1.5 b/l

C:\Users\Valice\Desktop\Gousei\Chen\dataset\L7PrR2.als

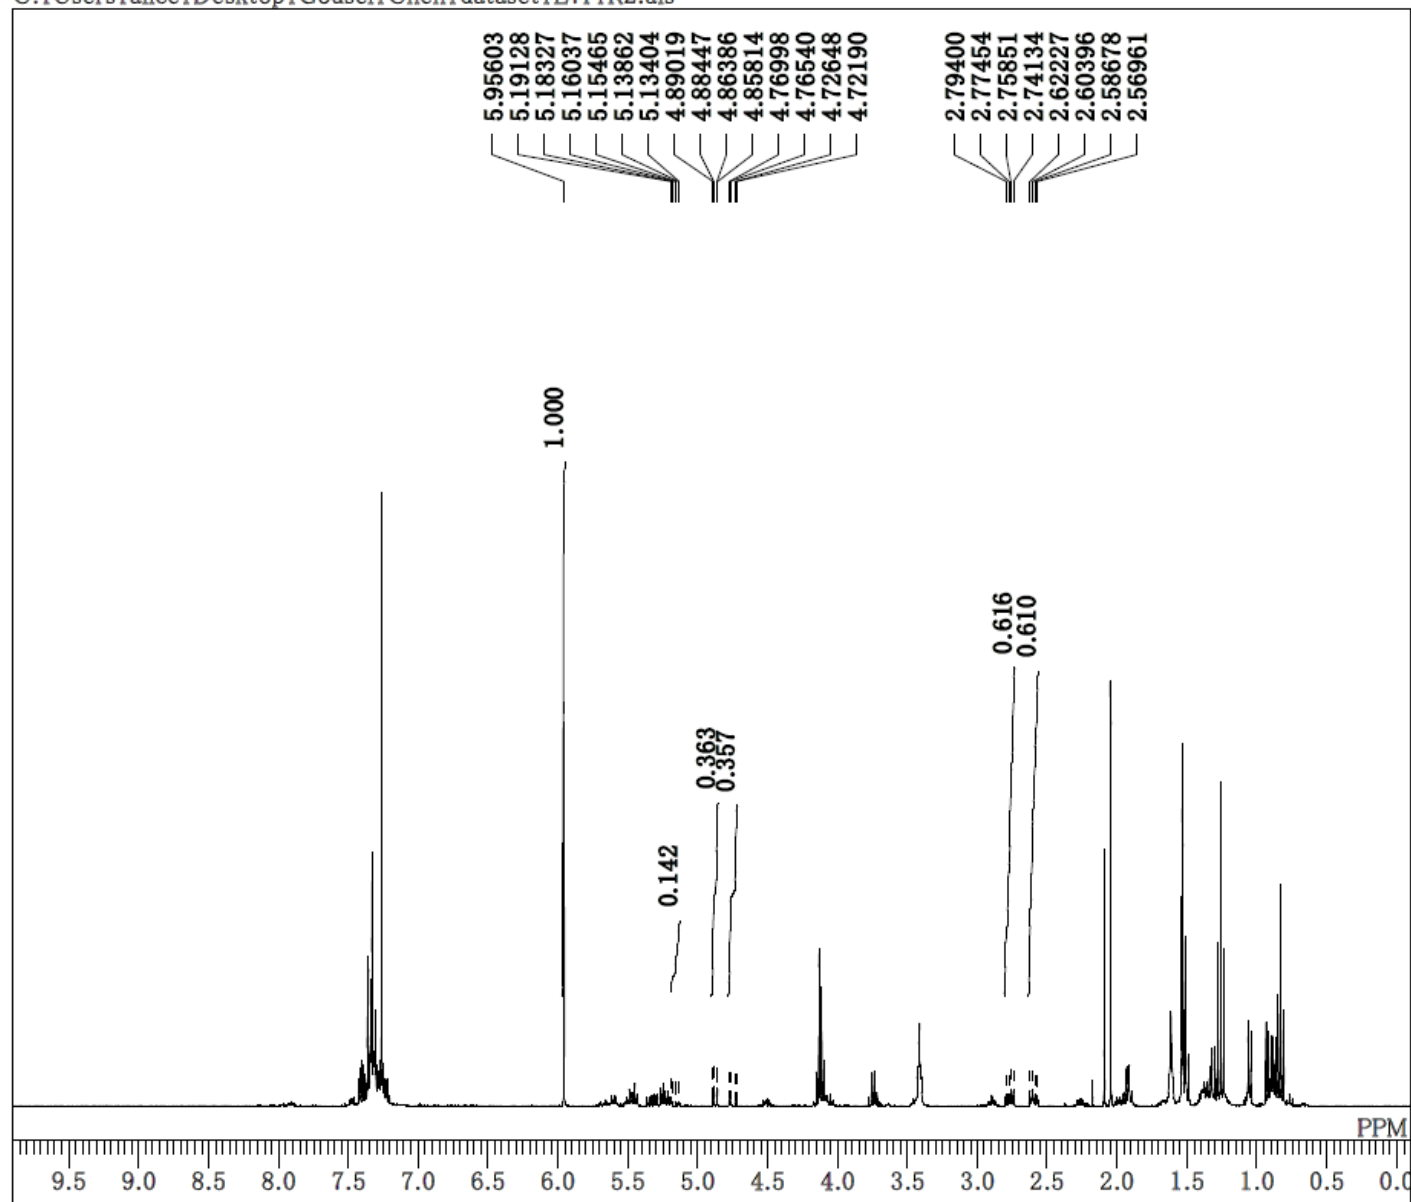

DFILE L7PrR2.als  
 COMNT  
 DATIM 29-08-2020 23:08:22  
 OBNUC 1H  
 EXMOD proton.jxp  
 OBFRQ 391.78 MHz  
 OBSET 8.51 KHz  
 OBFIN 3.34 Hz  
 POINT 13107  
 FREQU 5878.90 Hz  
 SCANS 8  
 ACQTM 2.2295 sec  
 PD 6.0000 sec  
 PW1 5.17 usec  
 IRNUC 1H  
 CTEMP 20.7 c  
 SLVNT CDCL3  
 EXREF 7.26 ppm  
 BF 0.12 Hz  
 RGAIN 40

**L7/1Pr, R**

(2<sup>nd</sup> trial)

66%, 5.1/1 dr, 1/1.4 b/l

C:\Users\Valice\Desktop\Gousei\Chen\dataset\L8EtR1.als

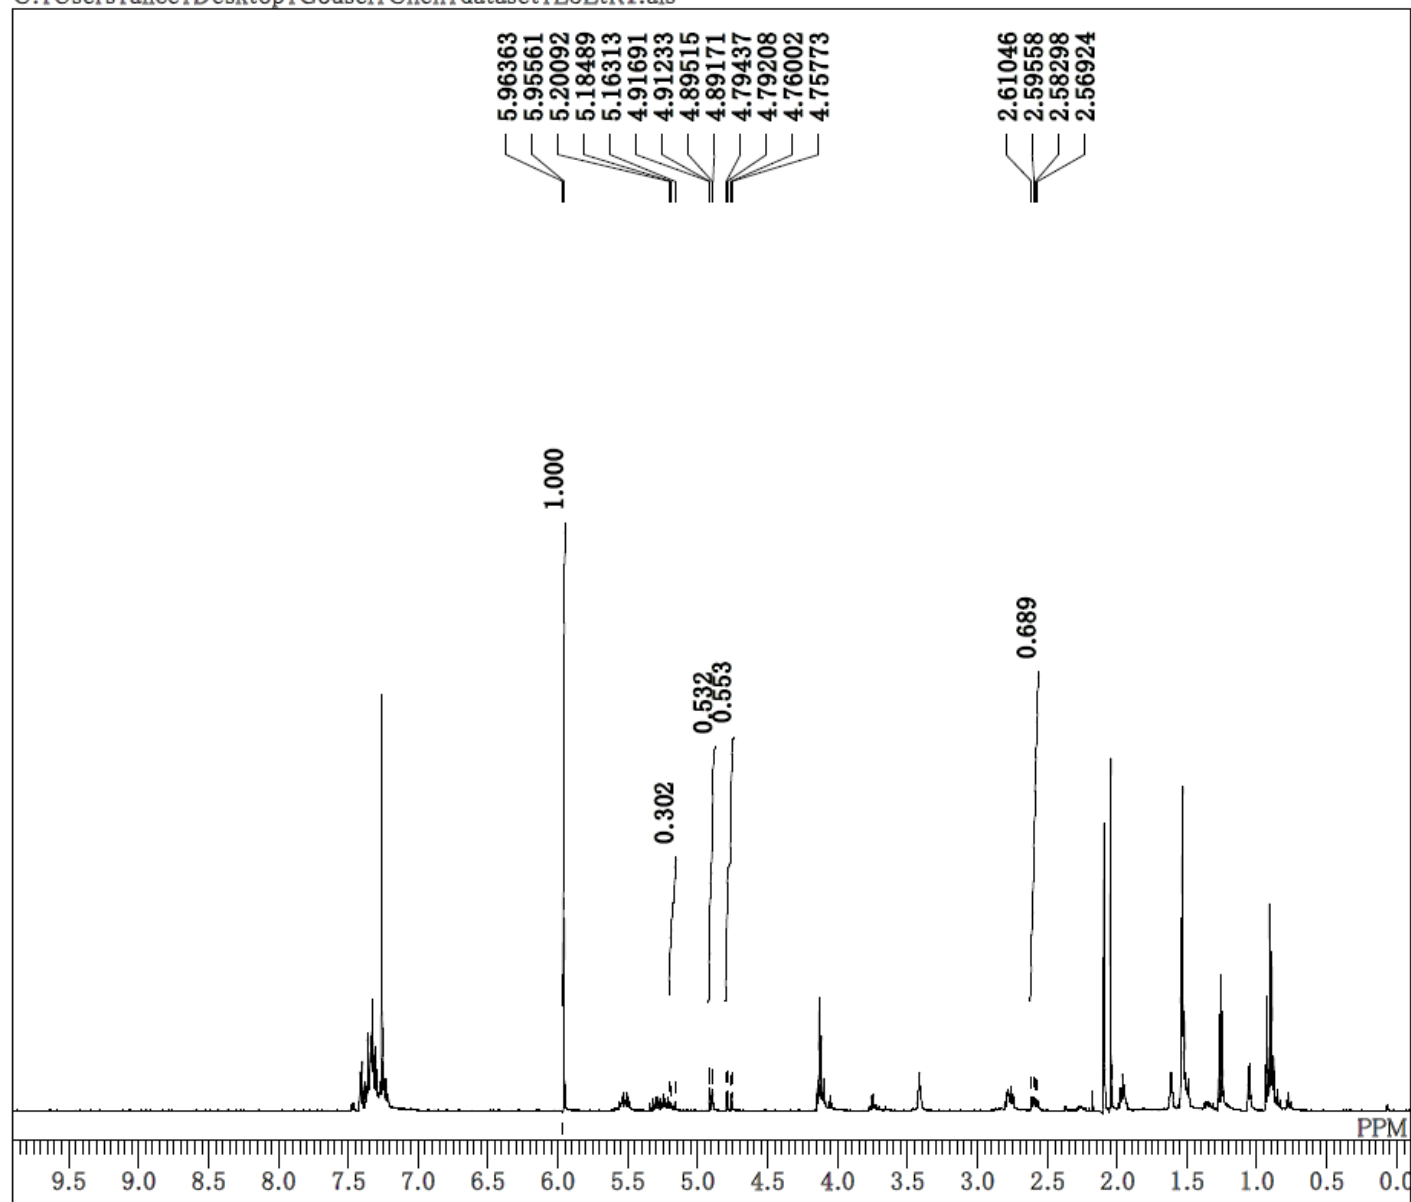

DFILE L8EtR1.als  
 COMNT  
 DATIM 2018-11-23 13:32:36  
 OBNUC 1H  
 EXMOD proton.jxp  
 OBFRQ 500.16 MHz  
 OBSET 2.41 KHz  
 OBFIN 6.01 Hz  
 POINT 13107  
 FREQU 7507.51 Hz  
 SCANS 8  
 ACQTM 1.7459 sec  
 PD 5.0000 sec  
 PW1 5.55 usec  
 IRNUC 1H  
 CTEMP 21.8 c  
 SLVNT CDCL3  
 EXREF 7.26 ppm  
 BF 0.12 Hz  
 RGAIN 32

**L8/1Et, R**

(1<sup>st</sup> trial)

87%, 3.6/1 dr, 1.0/1 b/1



C:\Users\Valice\Desktop\Gousei\Chen\dataset\L8EtR2.als

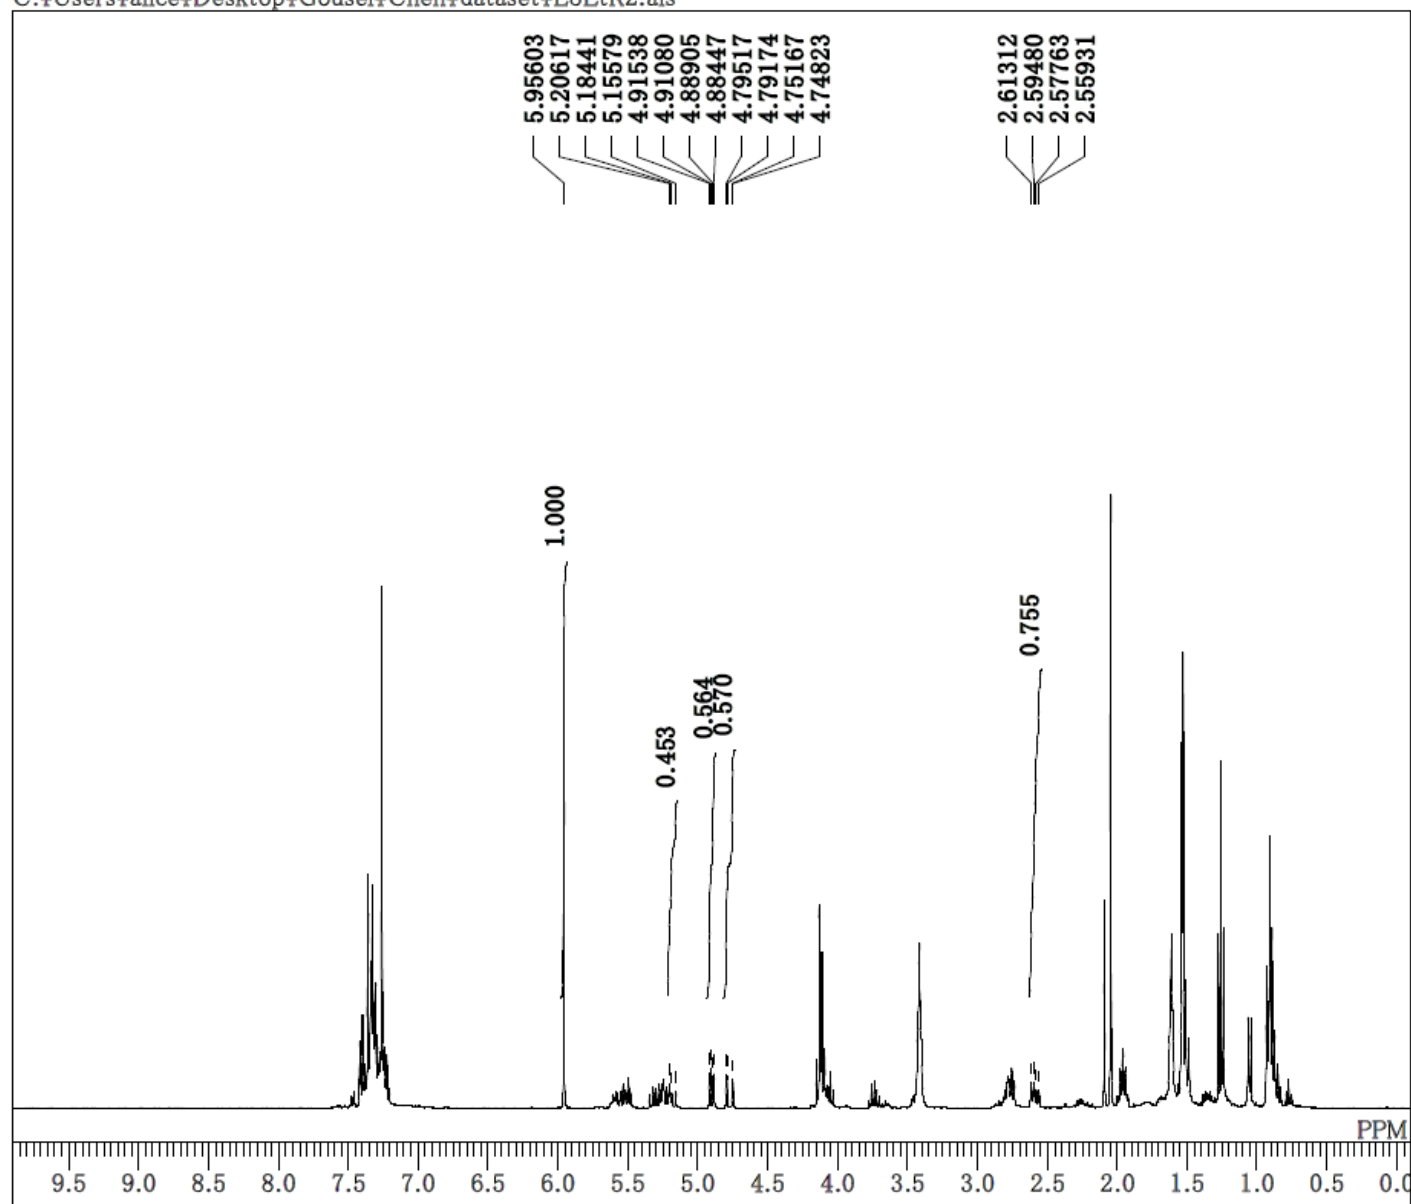

DFILE L8EtR2.als  
COMNT  
DATIM 23-08-2020 22:40:21  
OBNUC 1H  
EXMOD proton.jxp  
OBFRQ 391.78 MHz  
OBSET 8.51 KHz  
OBFIN 3.34 Hz  
POINT 13107  
FREQU 5878.90 Hz  
SCANS 8  
ACQTM 2.2295 sec  
PD 6.0000 sec  
PW1 5.17 usec  
IRNUC 1H  
CTEMP 20.1 c  
SLVNT CDCL3  
EXREF 7.26 ppm  
BF 0.62 Hz  
RGAIN 40

**L8/1Et, *R***  
(2<sup>nd</sup> trial)  
98%, 2.5/1 dr, 1.1/1 b/l

C:\Users\Valice\Desktop\Gousei\Chen\dataset\L8PrR1.als

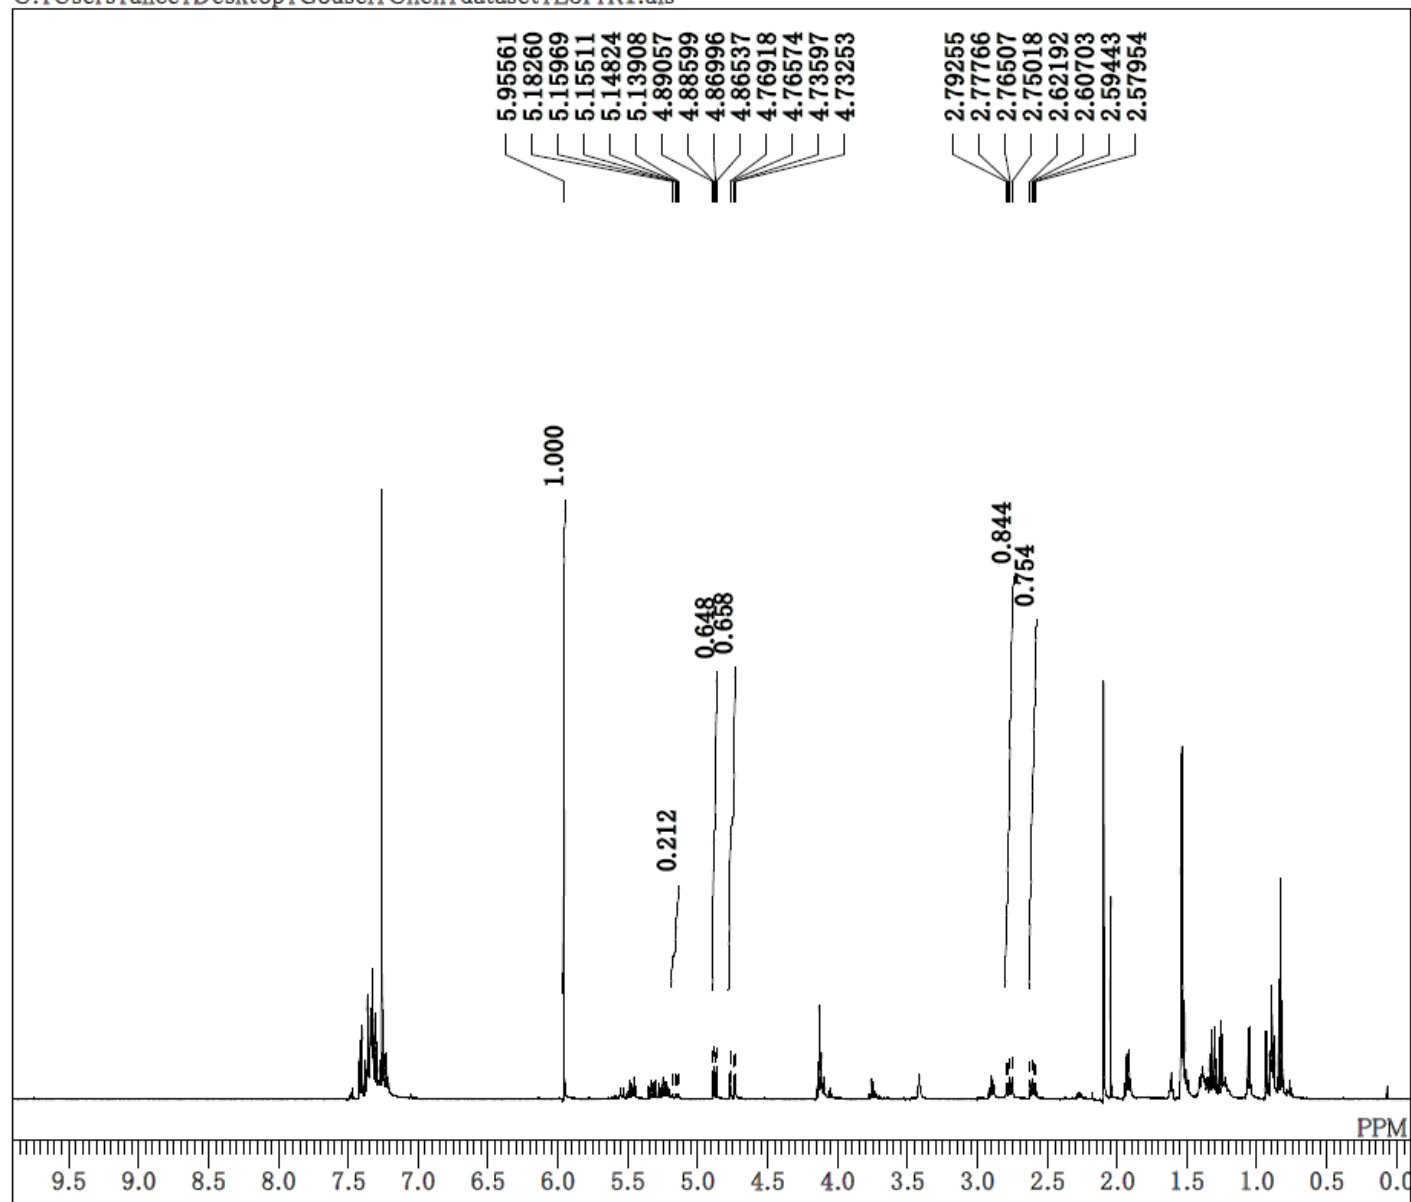

DFILE L8PrR1.als  
 COMNT  
 DATIM 2018-11-21 16:09:37  
 OBNUC 1H  
 EXMOD proton.jxp  
 OBFRQ 500.16 MHz  
 OBSET 2.41 KHz  
 OBFIN 6.01 Hz  
 POINT 13107  
 FREQU 7507.51 Hz  
 SCANS 8  
 ACQTM 1.7459 sec  
 PD 5.0000 sec  
 PW1 5.55 usec  
 IRNUC 1H  
 CTEMP 21.9 c  
 SLVNT CDCL3  
 EXREF 7.26 ppm  
 BF 0.12 Hz  
 RGAIN 32

**L8/1Pr, R**  
 (1<sup>st</sup> trial)  
 98%, 6.2/1 dr, 1/1.1 b/l

C:\Users\Valice\Desktop\Gousei\Chen\dataset\L8PrR2.als

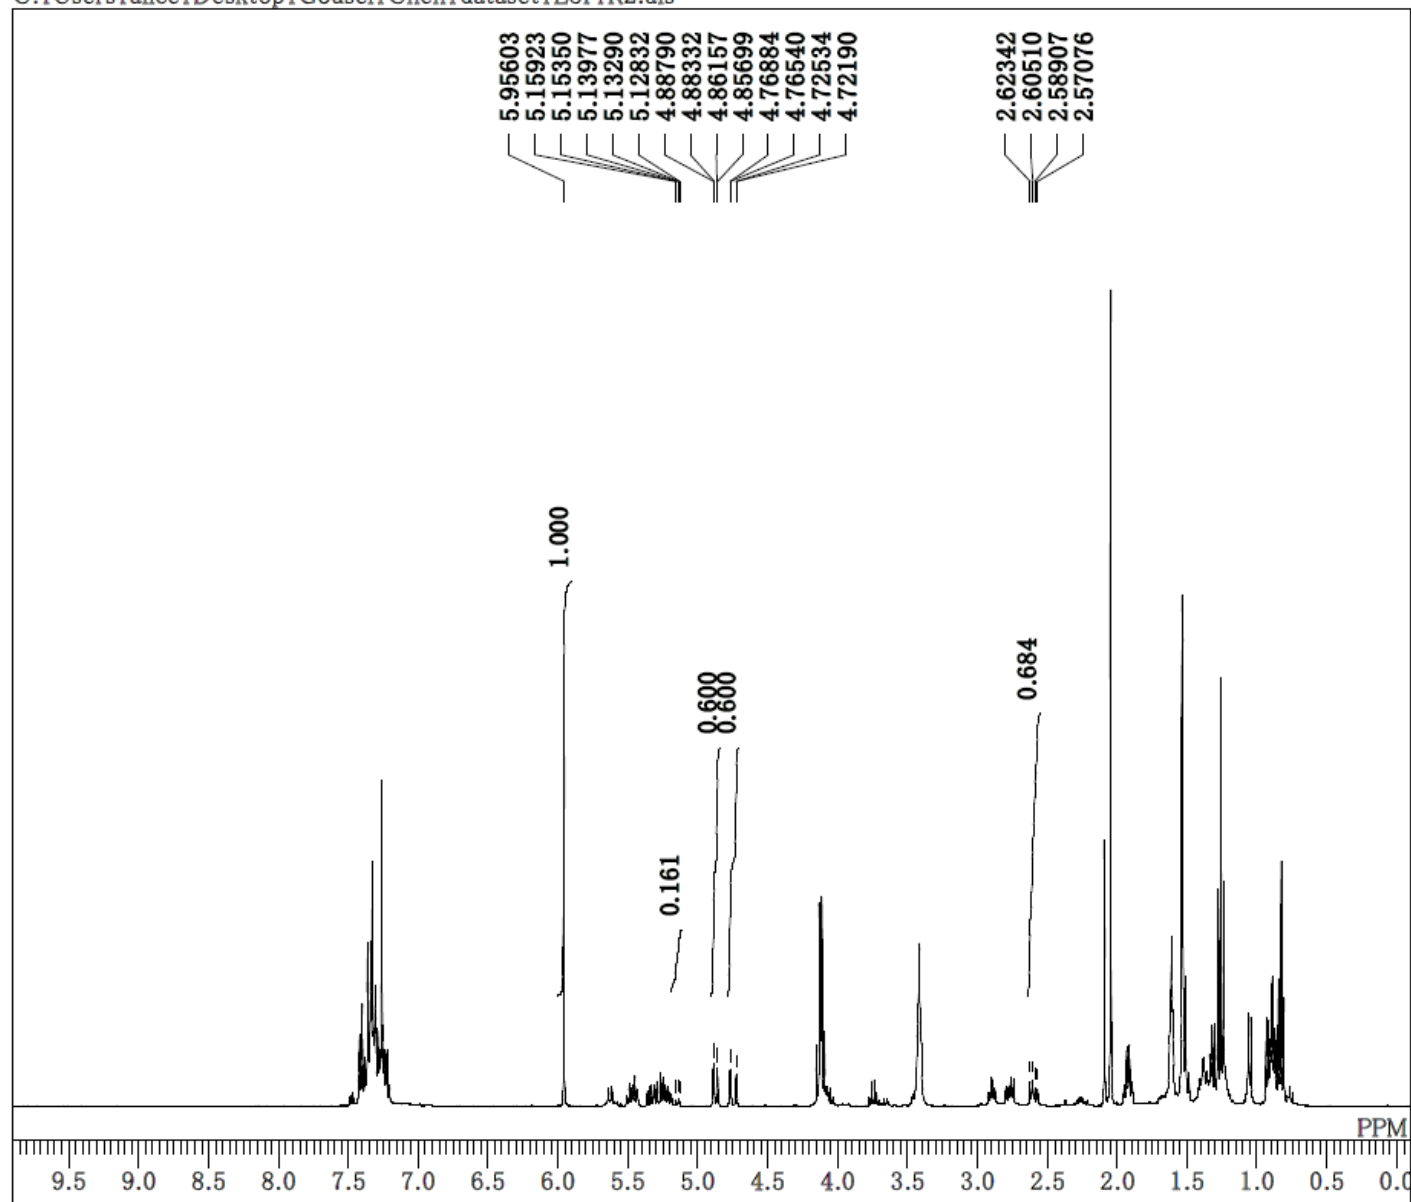

DFILE L8PrR2.als  
 COMNT  
 DATIM 23-08-2020 22:52:25  
 OBNUC 1H  
 EXMOD proton.jxp  
 OBFRQ 391.78 MHz  
 OBSET 8.51 KHz  
 OBFIN 3.34 Hz  
 POINT 13107  
 FREQU 5878.90 Hz  
 SCANS 8  
 ACQTM 2.2295 sec  
 PD 6.0000 sec  
 PW1 5.17 usec  
 IRNUC 1H  
 CTEMP 20.0 c  
 SLVNT CDCL3  
 EXREF 7.26 ppm  
 BF 0.62 Hz  
 RGAIN 36

**L8/1Pr, R**

(2<sup>nd</sup> trial)

86%, 7.5/1 dr, 1/1.0 b/l

C:\Users\Valice\Desktop\Gousei\Chen\dataset\L9EtR1.als

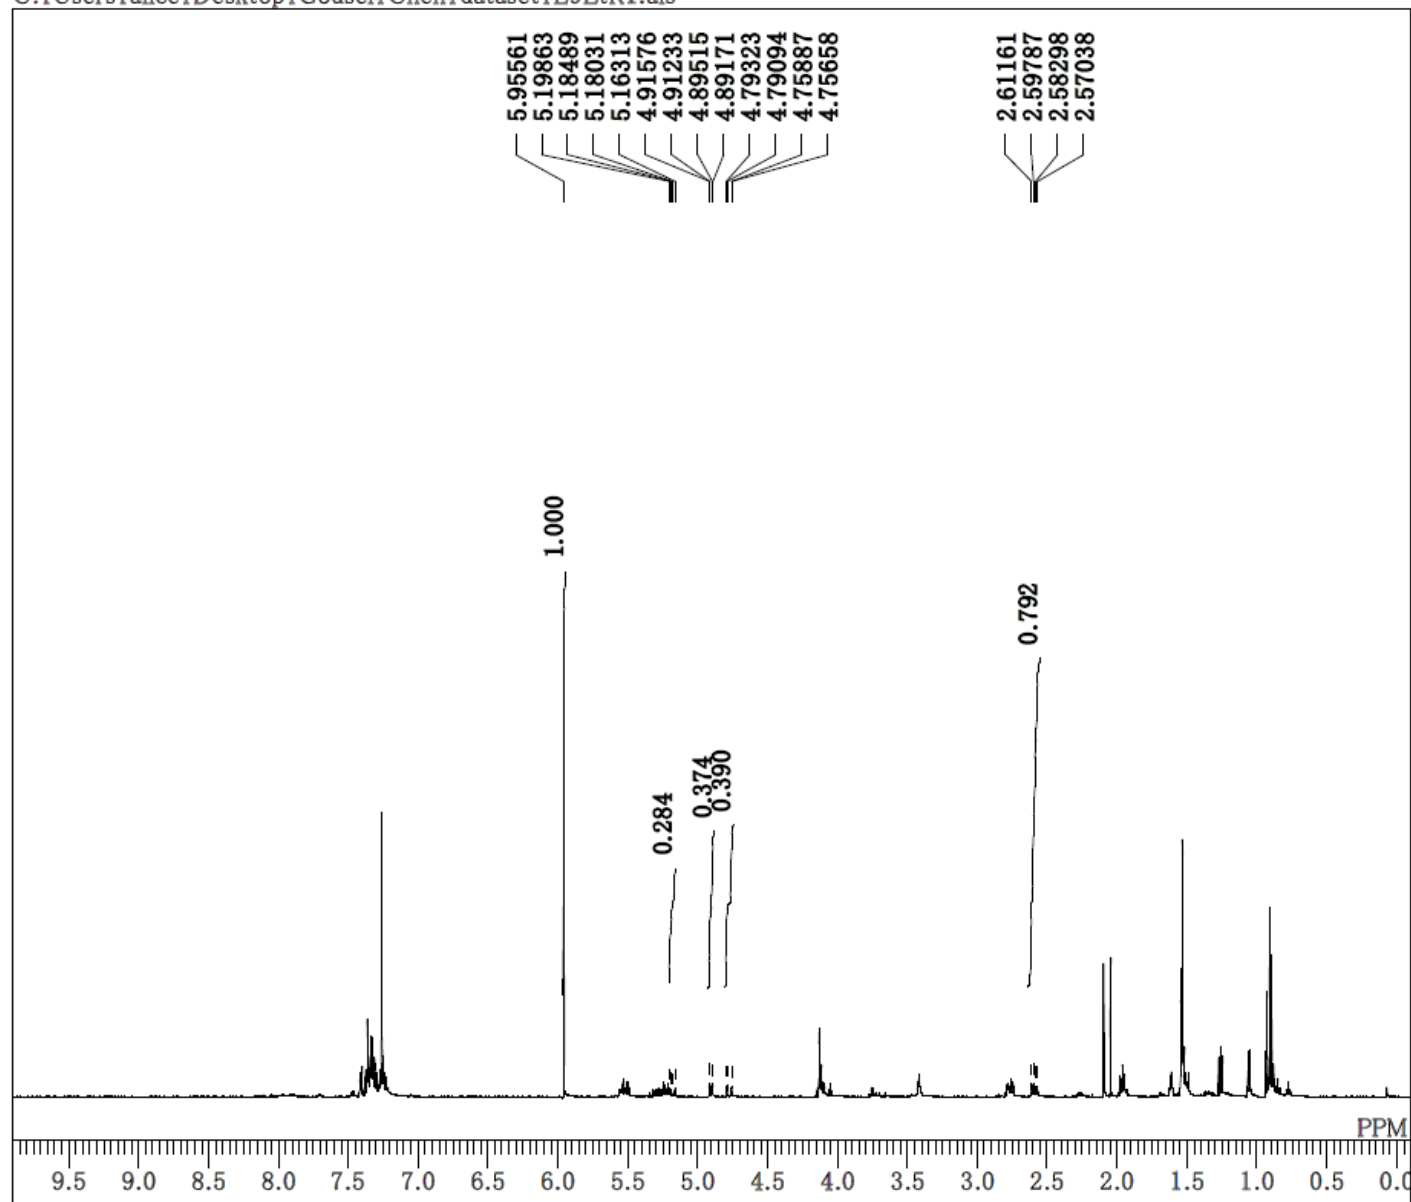

DFILE L9EtR1.als  
COMNT  
DATIM 2018-12-06 14:35:29  
OBNUC 1H  
EXMOD proton.jxp  
OBFRQ 500.16 MHz  
OBSET 2.41 KHz  
OBFIN 6.01 Hz  
POINT 13107  
FREQU 7507.51 Hz  
SCANS 8  
ACQTM 1.7459 sec  
PD 5.0000 sec  
PW1 5.55 usec  
IRNUC 1H  
CTEMP 21.7 c  
SLVNT CDCL3  
EXREF 7.26 ppm  
BF 0.12 Hz  
RGAIN 32

**L9/1Et, R**

(1<sup>st</sup> trial)

83%, 2.7/1 dr, 1/1.5 b/l

C:\Users\Valice\Desktop\Gousei\Chen\dataset\L9EtR2.als

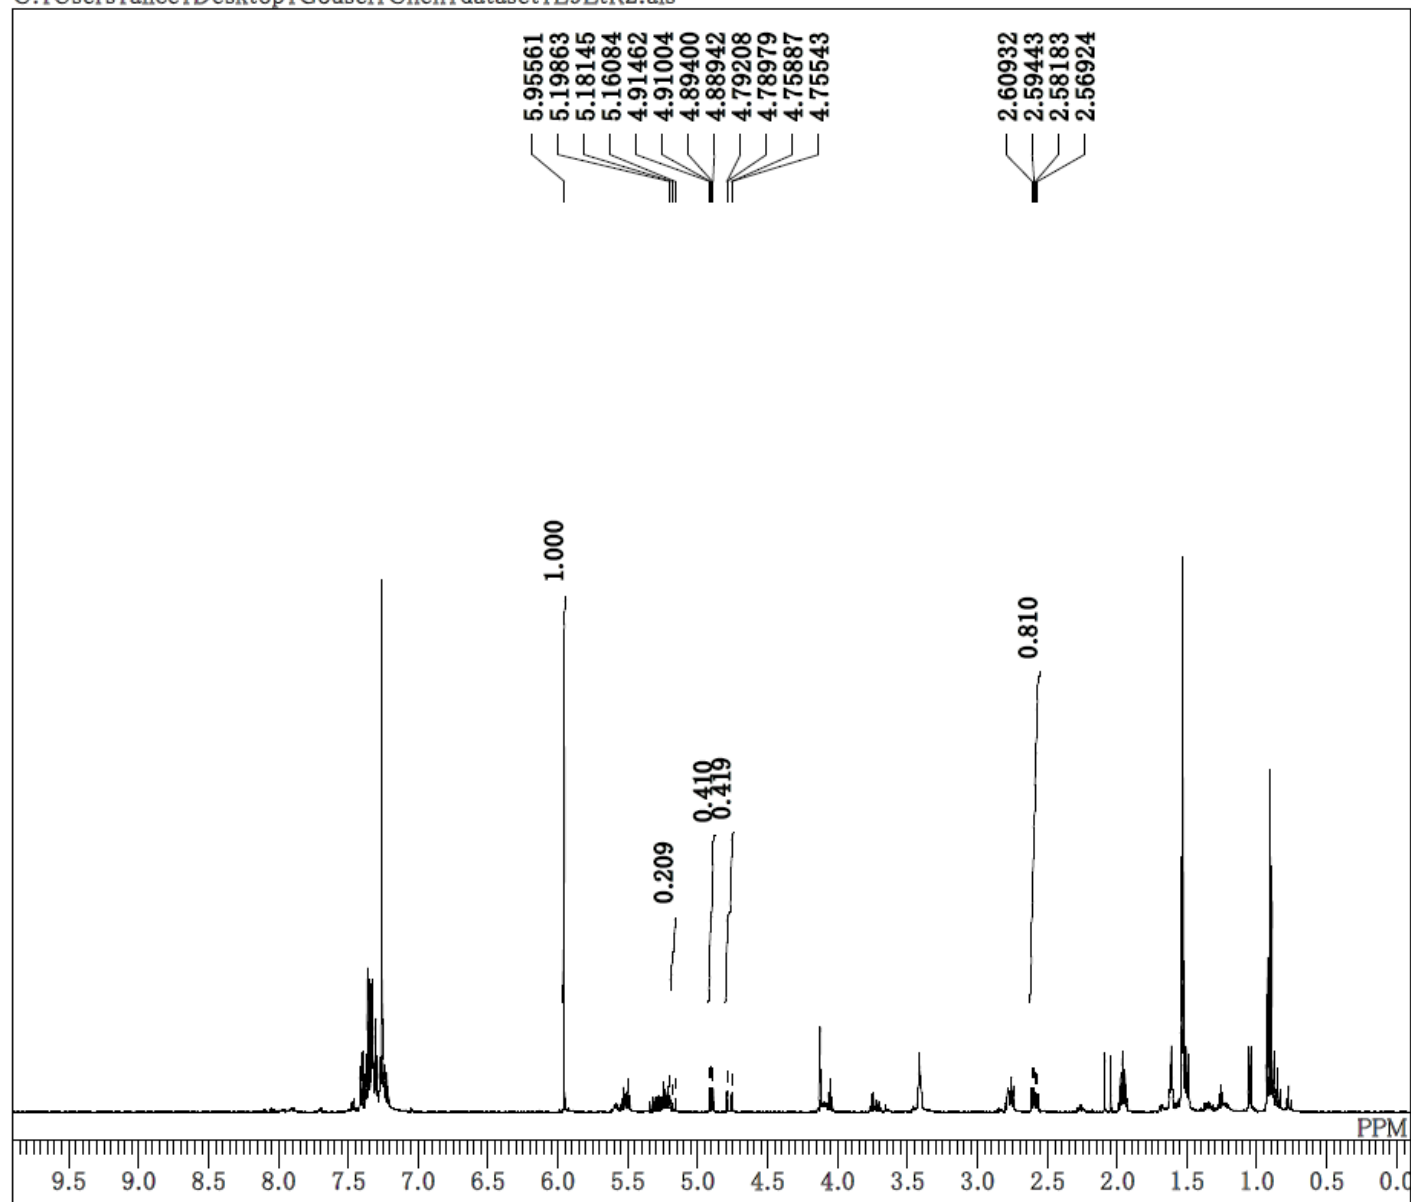

DFILE L9EtR2.als  
 COMNT  
 DATIM 2020-09-01 22:37:35  
 OBNUC 1H  
 EXMOD proton.jxp  
 OBFRQ 500.16 MHz  
 OBSET 2.41 KHz  
 OBFIN 6.01 Hz  
 POINT 13107  
 FREQU 7507.51 Hz  
 SCANS 8  
 ACQTM 1.7459 sec  
 PD 6.0000 sec  
 PW1 5.55 usec  
 IRNUC 1H  
 CTEMP 22.0 c  
 SLVNT CDCL3  
 EXREF 7.26 ppm  
 BF 0.12 Hz  
 RGAIN 42

**L9/1Et, R**

(2<sup>nd</sup> trial)

84%, 4.0/1 dr, 1/1.6 b/l

C:\Users\Valice\Desktop\Gousei\Chen\dataset\L9PrR1.als

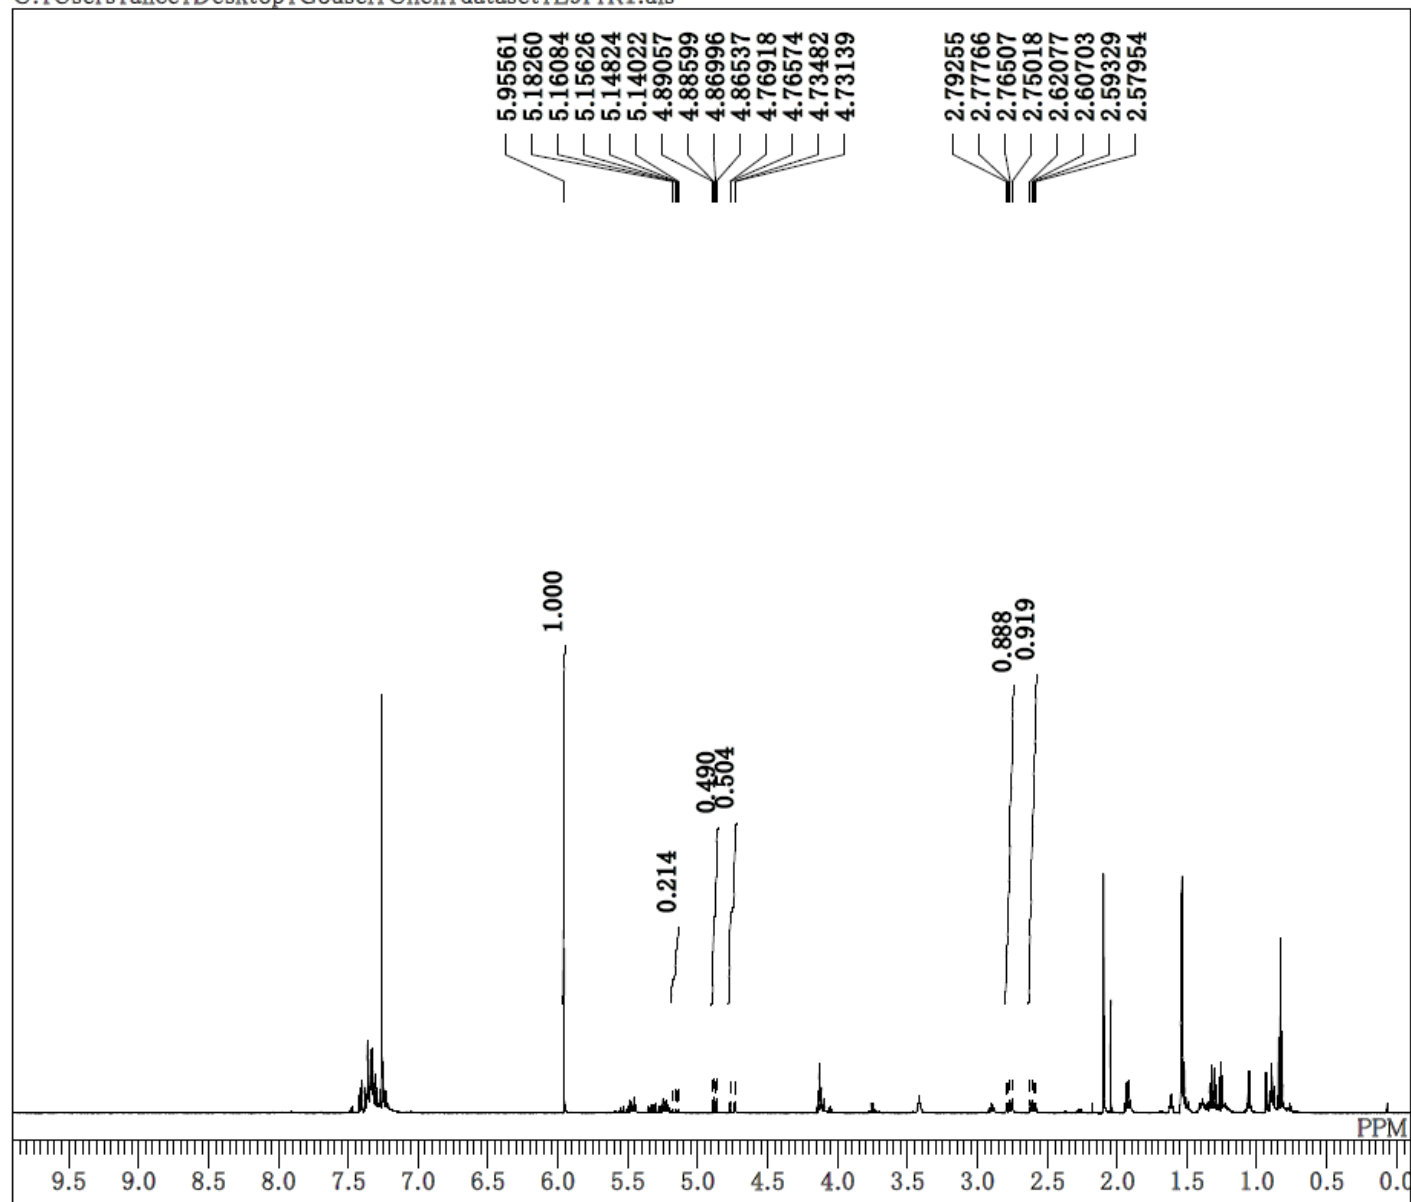

DFILE L9PrR1.als  
 COMNT  
 DATIM 2018-12-06 14:49:03  
 OBNUC 1H  
 EXMOD proton.jxp  
 OBFRQ 500.16 MHz  
 OBSET 2.41 KHz  
 OBFIN 6.01 Hz  
 POINT 13107  
 FREQU 7507.51 Hz  
 SCANS 8  
 ACQTM 1.7459 sec  
 PD 5.0000 sec  
 PW1 5.55 usec  
 IRNUC 1H  
 CTEMP 21.5 c  
 SLVNT CDCL3  
 EXREF 7.26 ppm  
 BF 0.12 Hz  
 RGAIN 32

**L9/1Pr, R**

(1<sup>st</sup> trial)

95%, 4.6/1 dr, 1/1.5 b/l

C:\Users\Valice\Desktop\Gousei\Chen\dataset\L9PrR2.als

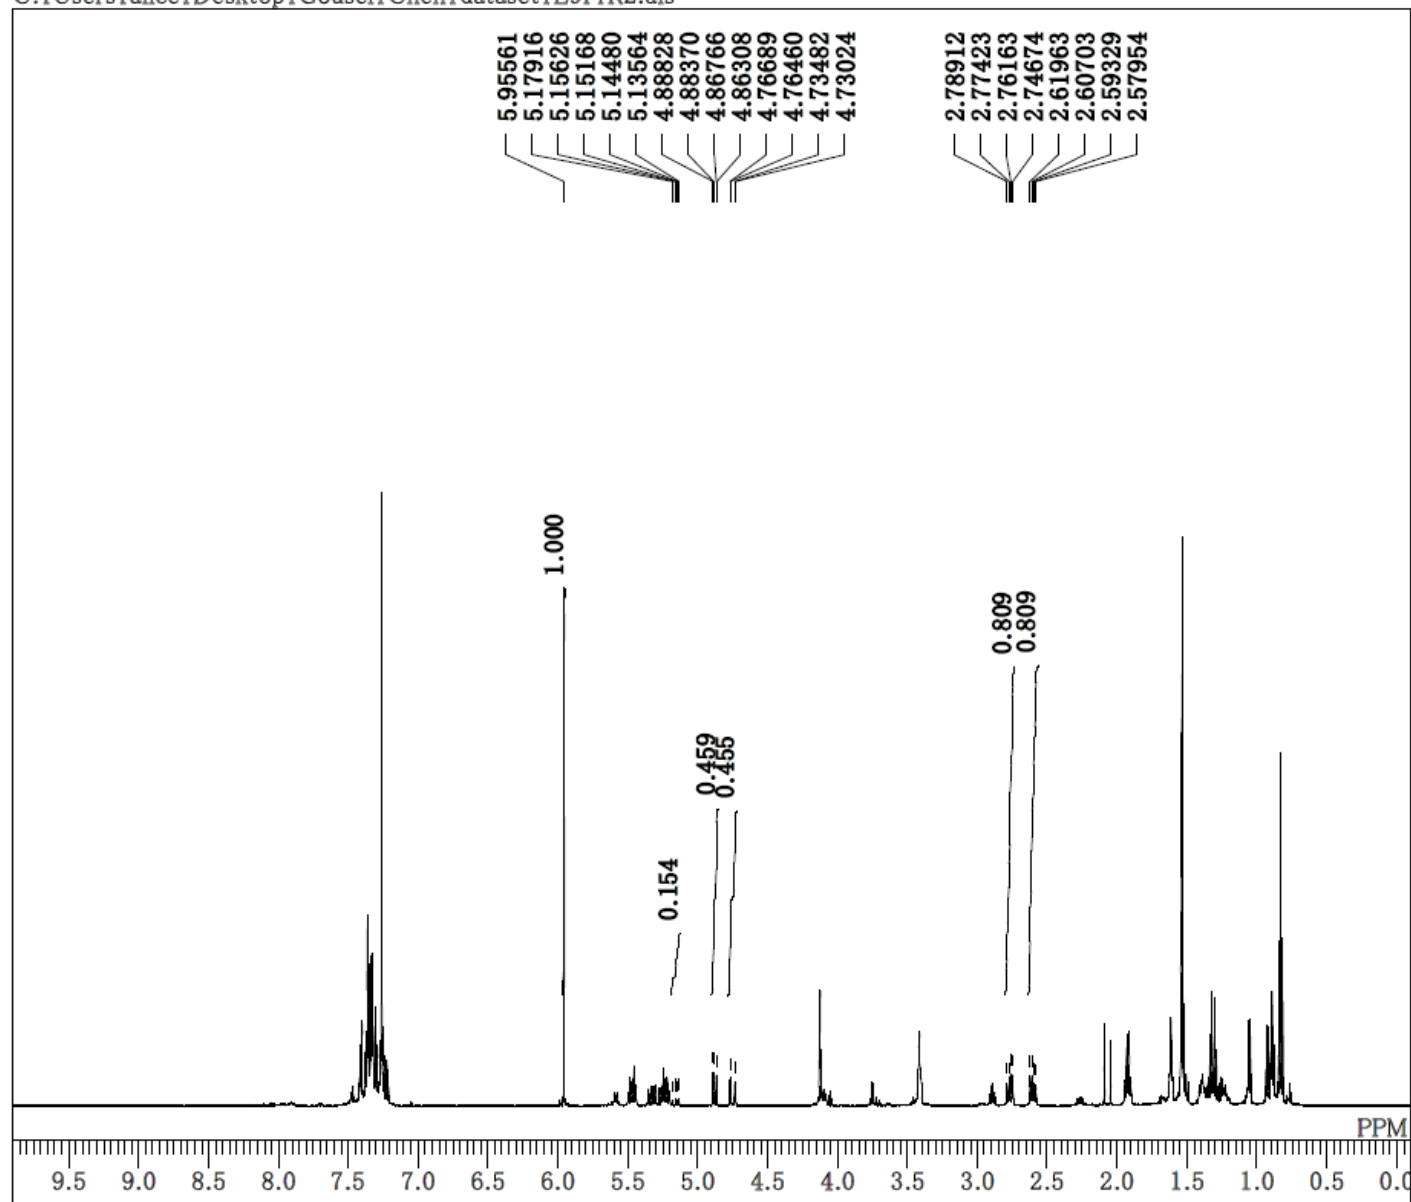

DFILE L9PrR2.als  
 COMNT  
 DATIM 2020-09-01 22:46:44  
 OBNUC 1H  
 EXMOD proton.jxp  
 OBFRQ 500.16 MHz  
 OBSET 2.41 KHz  
 OBFIN 6.01 Hz  
 POINT 13107  
 FREQU 7507.51 Hz  
 SCANS 8  
 ACQTM 1.7459 sec  
 PD 6.0000 sec  
 PW1 5.55 usec  
 IRNUC 1H  
 CTEMP 22.0 c  
 SLVNT CDCL3  
 EXREF 7.26 ppm  
 BF 0.12 Hz  
 RGAIN 42

**L9/1Pr, R**

(2<sup>nd</sup> trial)

85%, 5.9/1 dr, 1/1.5 b/l

C:\Users\Valice\Desktop\Gousei\Chen\dataset\L10EtR1.als

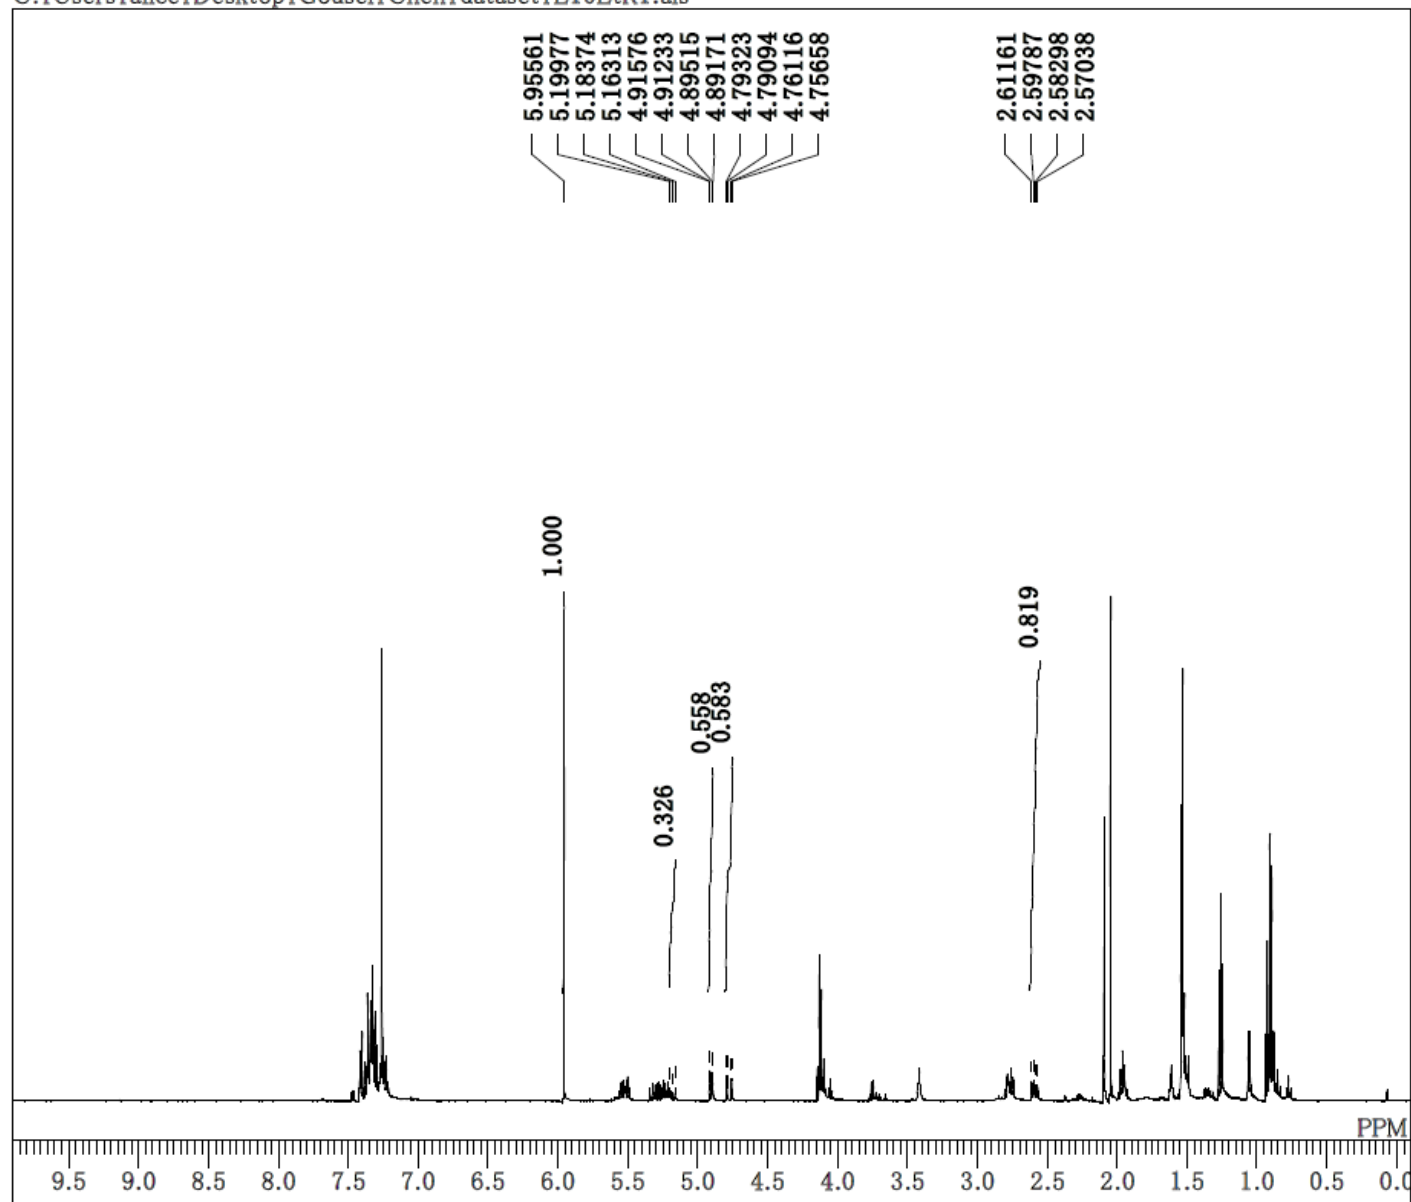

DFILE L10EtR1.als  
COMNT  
DATIM 2018-12-05 09:21:32  
OBNUC 1H  
EXMOD proton.jxp  
OBFRQ 500.16 MHz  
OBSET 2.41 KHz  
OBFIN 6.01 Hz  
POINT 13107  
FREQU 7507.51 Hz  
SCANS 8  
ACQTM 1.7459 sec  
PD 5.0000 sec  
PW1 5.55 usec  
IRNUC 1H  
CTEMP 21.9 c  
SLVNT CDCL3  
EXREF 7.26 ppm  
BF 0.12 Hz  
RGAIN 32

**L10/1Et, R**

(1<sup>st</sup> trial)

88%, 3.8/1 dr, 1/1.1 b/l



C:\Users\Valice\Desktop\Gousei\Chen\dataset\L10EtR2.als

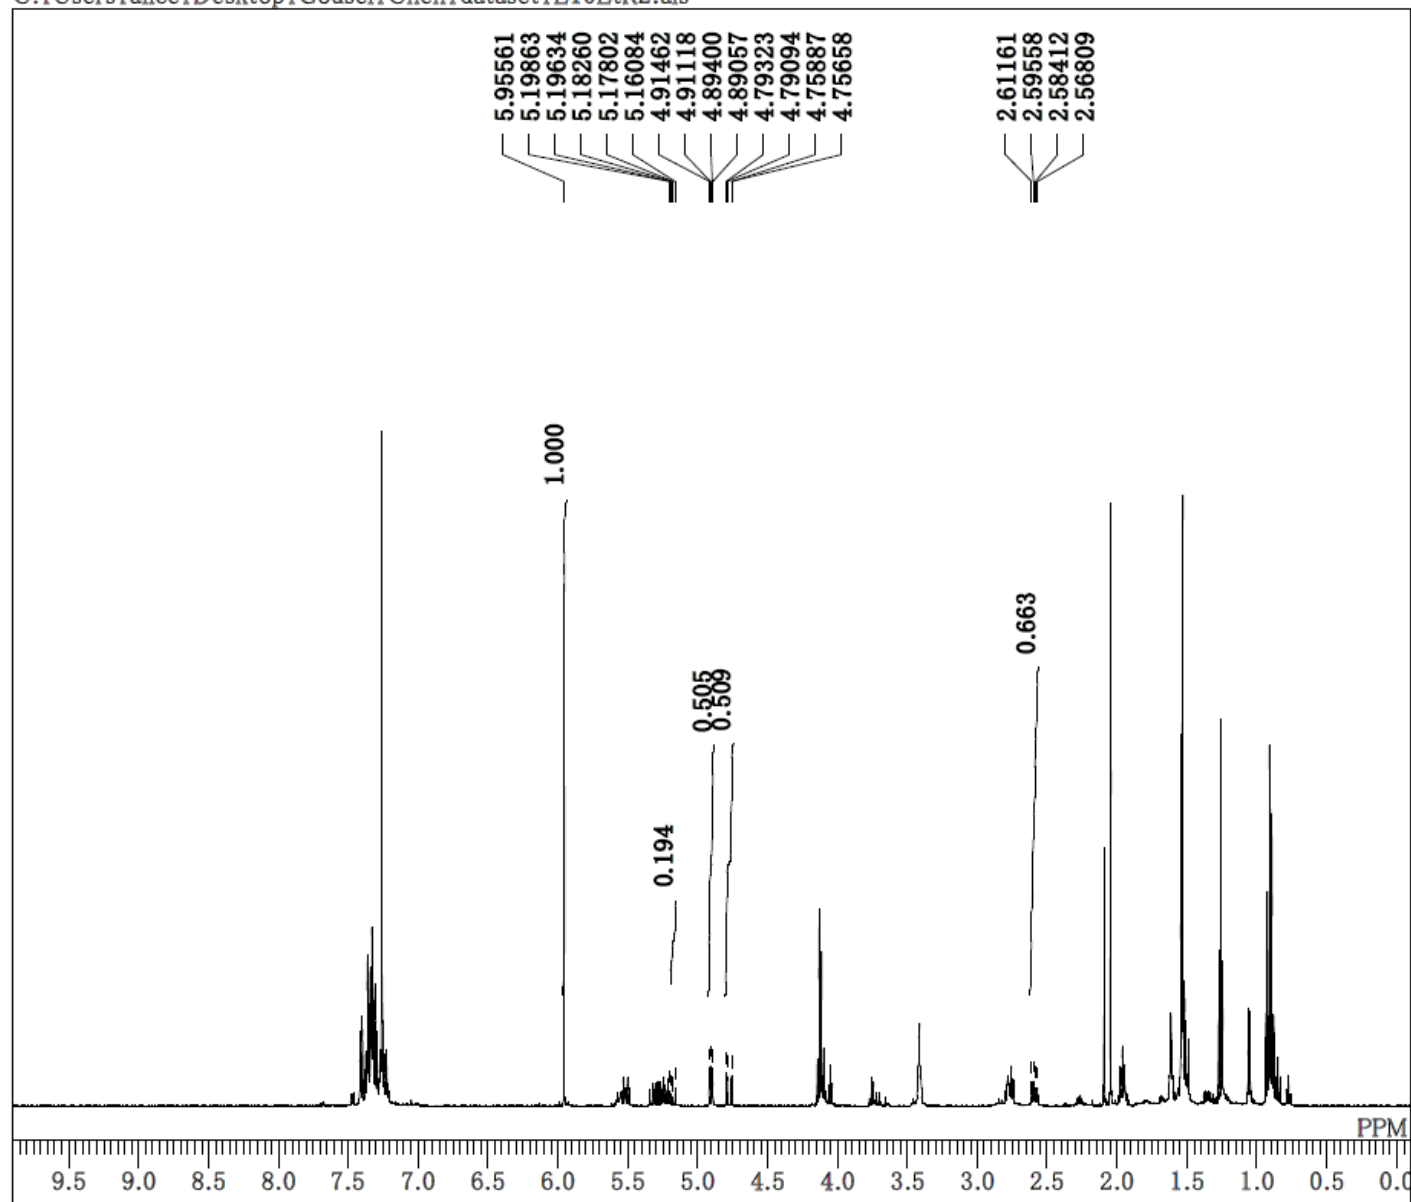

DFILE L10EtR2.als  
 COMNT  
 DATIM 2020-09-01 23:22:47  
 OBNUC 1H  
 EXMOD proton.jxp  
 OBFRQ 500.16 MHz  
 OBSET 2.41 KHz  
 OBFIN 6.01 Hz  
 POINT 13107  
 FREQU 7507.51 Hz  
 SCANS 8  
 ACQTM 1.7459 sec  
 PD 6.0000 sec  
 PW1 5.55 usec  
 IRNUC 1H  
 CTEMP 21.9 c  
 SLVNT CDCL3  
 EXREF 7.26 ppm  
 BF 0.12 Hz  
 RGAIN 42

**L10/1Et, R**  
 (2<sup>nd</sup> trial)  
 80%, 5.2/1 dr, 1/1.1 b/l

C:\Users\Valice\Desktop\Gousei\Chen\dataset\L10PrR1.als

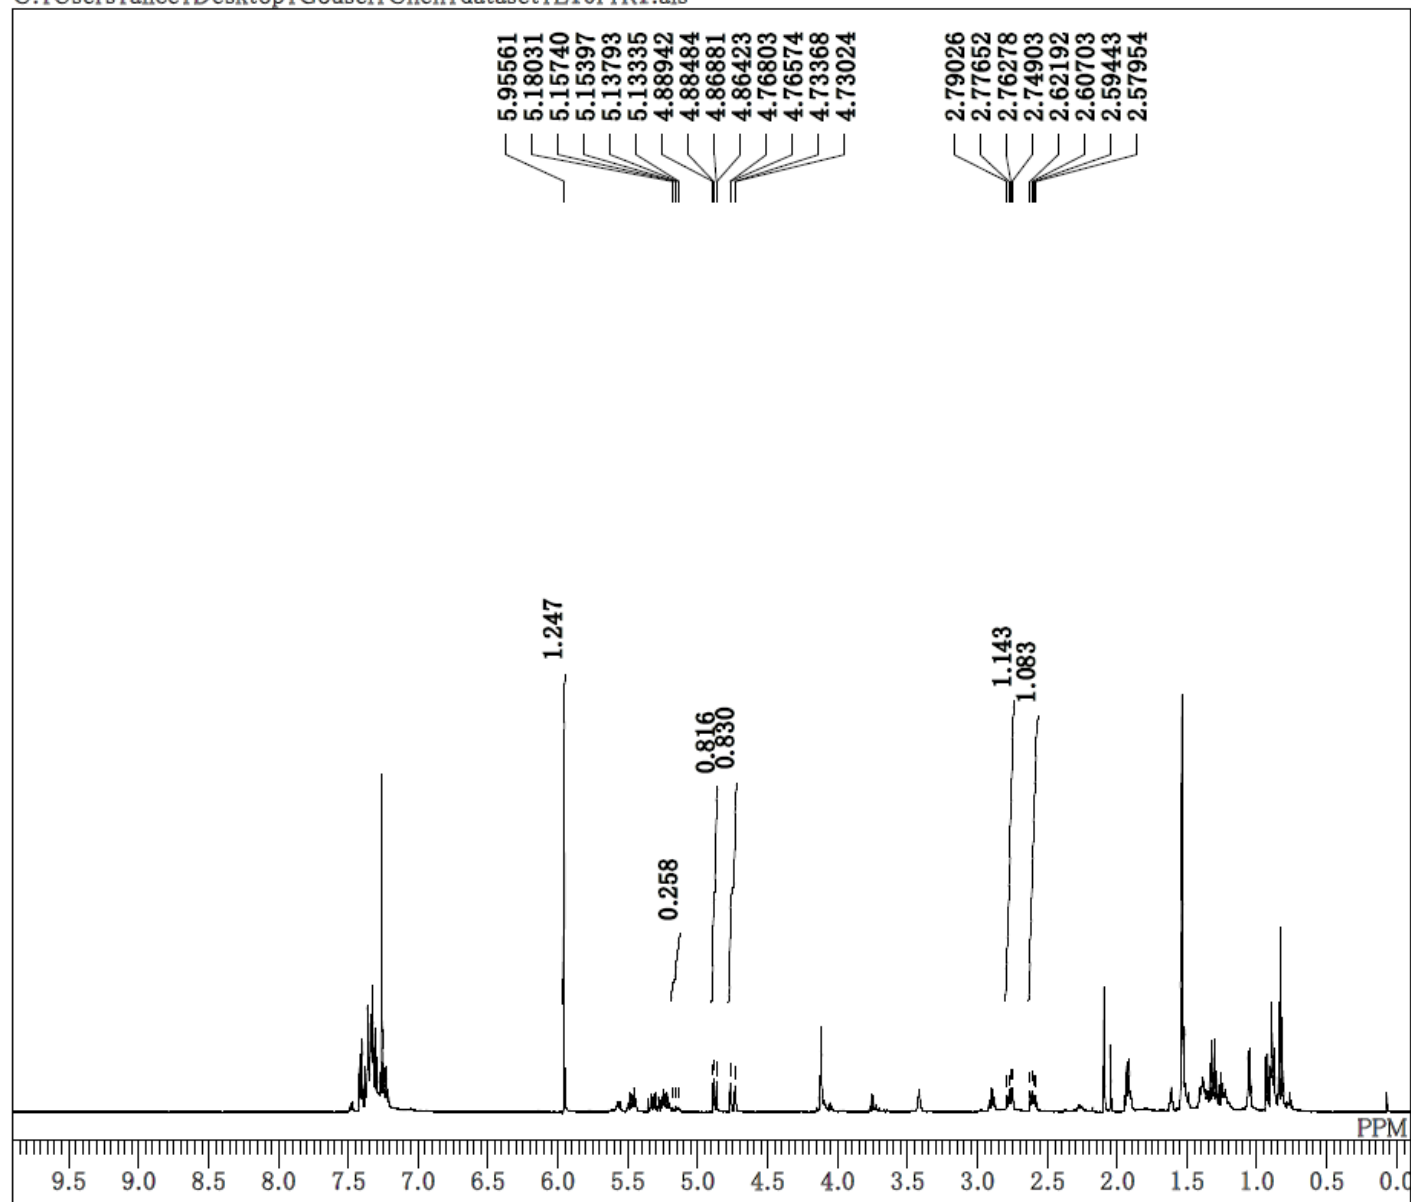

|       |                     |
|-------|---------------------|
| DFILE | L10PrR1.als         |
| COMNT |                     |
| DATIM | 2018-12-03 17:39:16 |
| OBNUC | <sup>1</sup> H      |
| EXMOD | proton.jxp          |
| OBFRQ | 500.16 MHz          |
| OBSET | 2.41 KHz            |
| OBFIN | 6.01 Hz             |
| POINT | 13107               |
| FREQU | 7507.51 Hz          |
| SCANS | 8                   |
| ACQTM | 1.7459 sec          |
| PD    | 5.0000 sec          |
| PW1   | 5.55 usec           |
| IRNUC | <sup>1</sup> H      |
| CTEMP | 21.9 c              |
| SLVNT | CDCL <sub>3</sub>   |
| EXREF | 7.26 ppm            |
| BF    | 0.12 Hz             |
| RGAIN | 32                  |

**L10/1Pr, R**

(1<sup>st</sup> trial)

100%, 6.7/1 dr, 1/1.2 b/l

C:\Users\Valice\Desktop\Gousei\Chen\dataset\L10PrR2.als

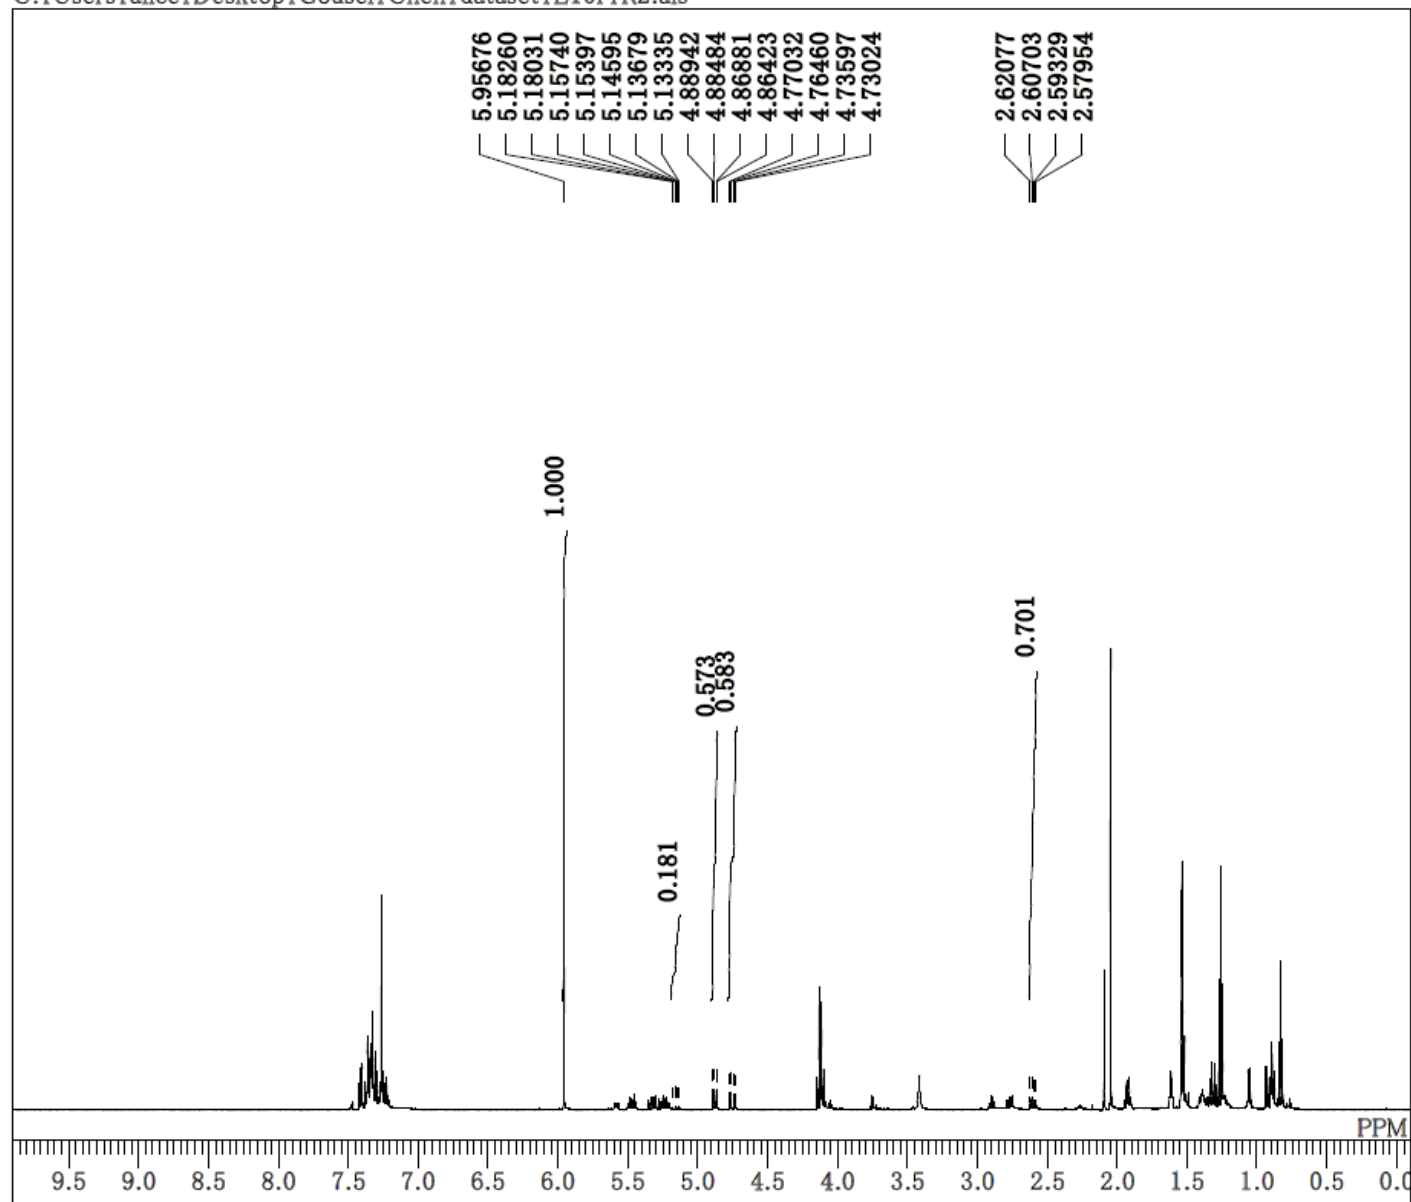

DFILE L10PrR2.als  
 COMNT  
 DATIM 2020-09-01 23:33:41  
 OBNUC 1H  
 EXMOD proton.jxp  
 OBFRQ 500.16 MHz  
 OBSET 2.41 KHz  
 OBFIN 6.01 Hz  
 POINT 13107  
 FREQU 7507.51 Hz  
 SCANS 8  
 ACQTM 1.7459 sec  
 PD 6.0000 sec  
 PW1 5.55 usec  
 IRNUC 1H  
 CTEMP 22.1 c  
 SLVNT CDCL3  
 EXREF 7.26 ppm  
 BF 0.12 Hz  
 RGAIN 42

**L10/1Pr, R**

(2<sup>nd</sup> trial)

86%, 6.4/1 dr, 1/1.0 b/l

C:\Users\Valice\Desktop\Gousei\Chen\dataset\L11EtR1.als

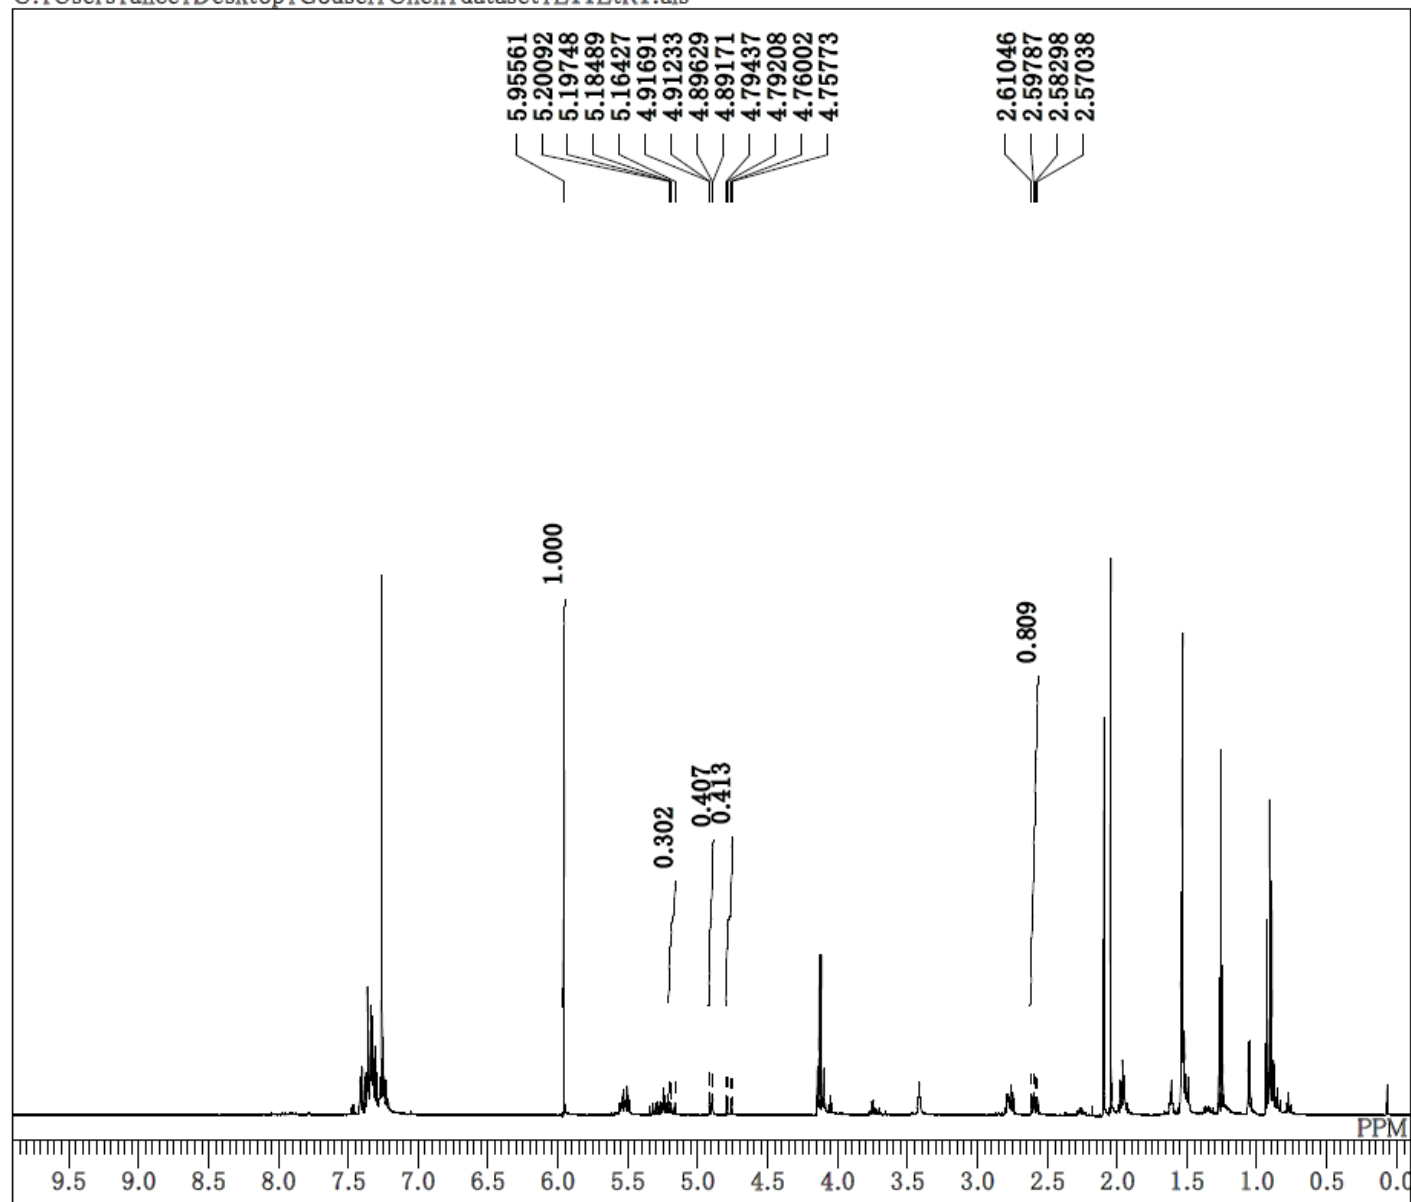

DFILE L11EtR1.als  
 COMNT  
 DATIM 2018-12-05 09:34:08  
 OBNUC 1H  
 EXMOD proton.jxp  
 OBFRQ 500.16 MHz  
 OBSET 2.41 KHz  
 OBFIN 6.01 Hz  
 POINT 13107  
 FREQU 7507.51 Hz  
 SCANS 8  
 ACQTM 1.7459 sec  
 PD 5.0000 sec  
 PW1 5.55 usec  
 IRNUC 1H  
 CTEMP 22.1 c  
 SLVNT CDCL3  
 EXREF 7.26 ppm  
 BF 0.12 Hz  
 RGAIN 32

**L11/1Et, R**

(1<sup>st</sup> trial)

86%, 2.7/1 dr, 1/1.4 b/l

C:\Users\Valice\Desktop\Gousei\Chen\dataset\L11EtR2.als

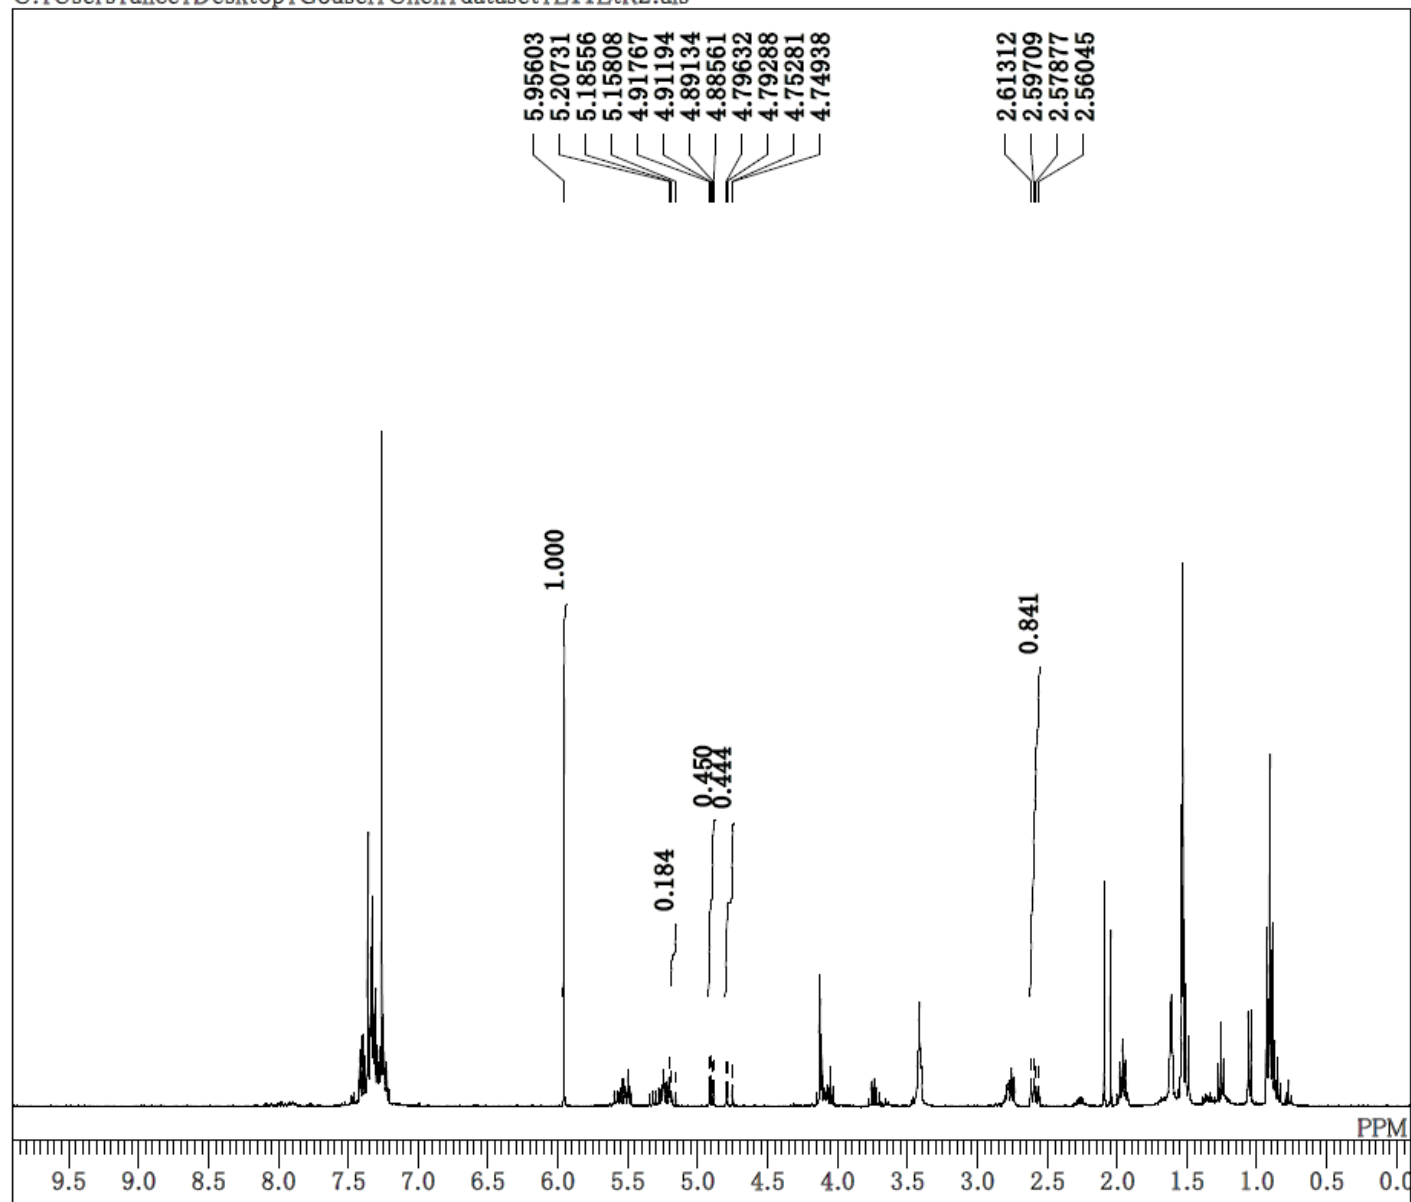

DFILE L11EtR2.als  
COMNT  
DATIM 04-09-2020 02:09:29  
OBNUC 1H  
EXMOD proton.jxp  
OBFRQ 391.78 MHz  
OBSET 8.51 KHz  
OBFIN 3.34 Hz  
POINT 13107  
FREQU 5878.90 Hz  
SCANS 8  
ACQTM 2.2295 sec  
PD 6.0000 sec  
PW1 5.17 usec  
IRNUC 1H  
CTEMP 20.9 c  
SLVNT CDCL3  
EXREF 7.26 ppm  
BF 0.12 Hz  
RGAIN 42

**L11/1Et, *R***

(2<sup>nd</sup> trial)

87%, 4.9/1 dr, 1/1.6 b/l

C:\Users\Valice\Desktop\Gousei\Chen\dataset\L11PrR1.als

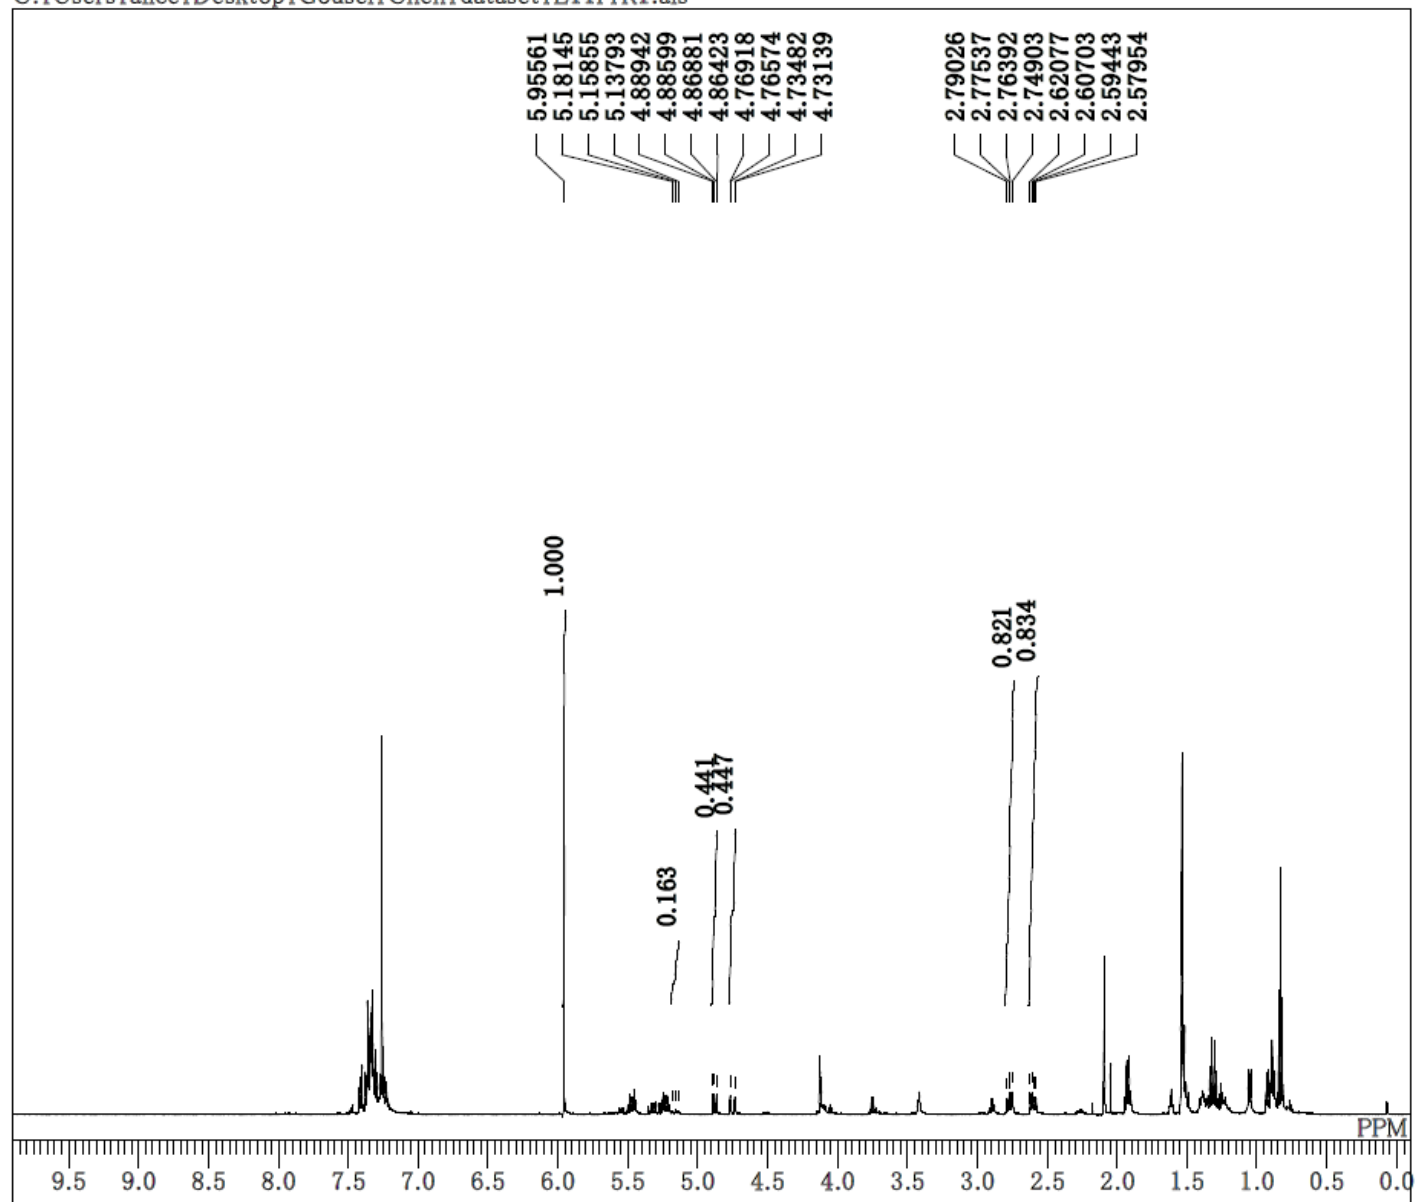

DFILE L11PrR1.als  
COMNT  
DATIM 2018-12-03 17:54:30  
OBNUC 1H  
EXMOD proton.jxp  
OBFRQ 500.16 MHz  
OBSET 2.41 KHz  
OBFIN 6.01 Hz  
POINT 13107  
FREQU 7507.51 Hz  
SCANS 8  
ACQTM 1.7459 sec  
PD 5.0000 sec  
PW1 5.55 usec  
IRNUC 1H  
CTEMP 21.8 c  
SLVNT CDCL3  
EXREF 7.26 ppm  
BF 0.12 Hz  
RGAIN 32

**L11/1Pr, R**

(1<sup>st</sup> trial)

85%, 5.4/1 dr, 1/1.6 b/l

C:\Users\Valice\Desktop\Gousei\Chen\dataset\L11PrR2.als

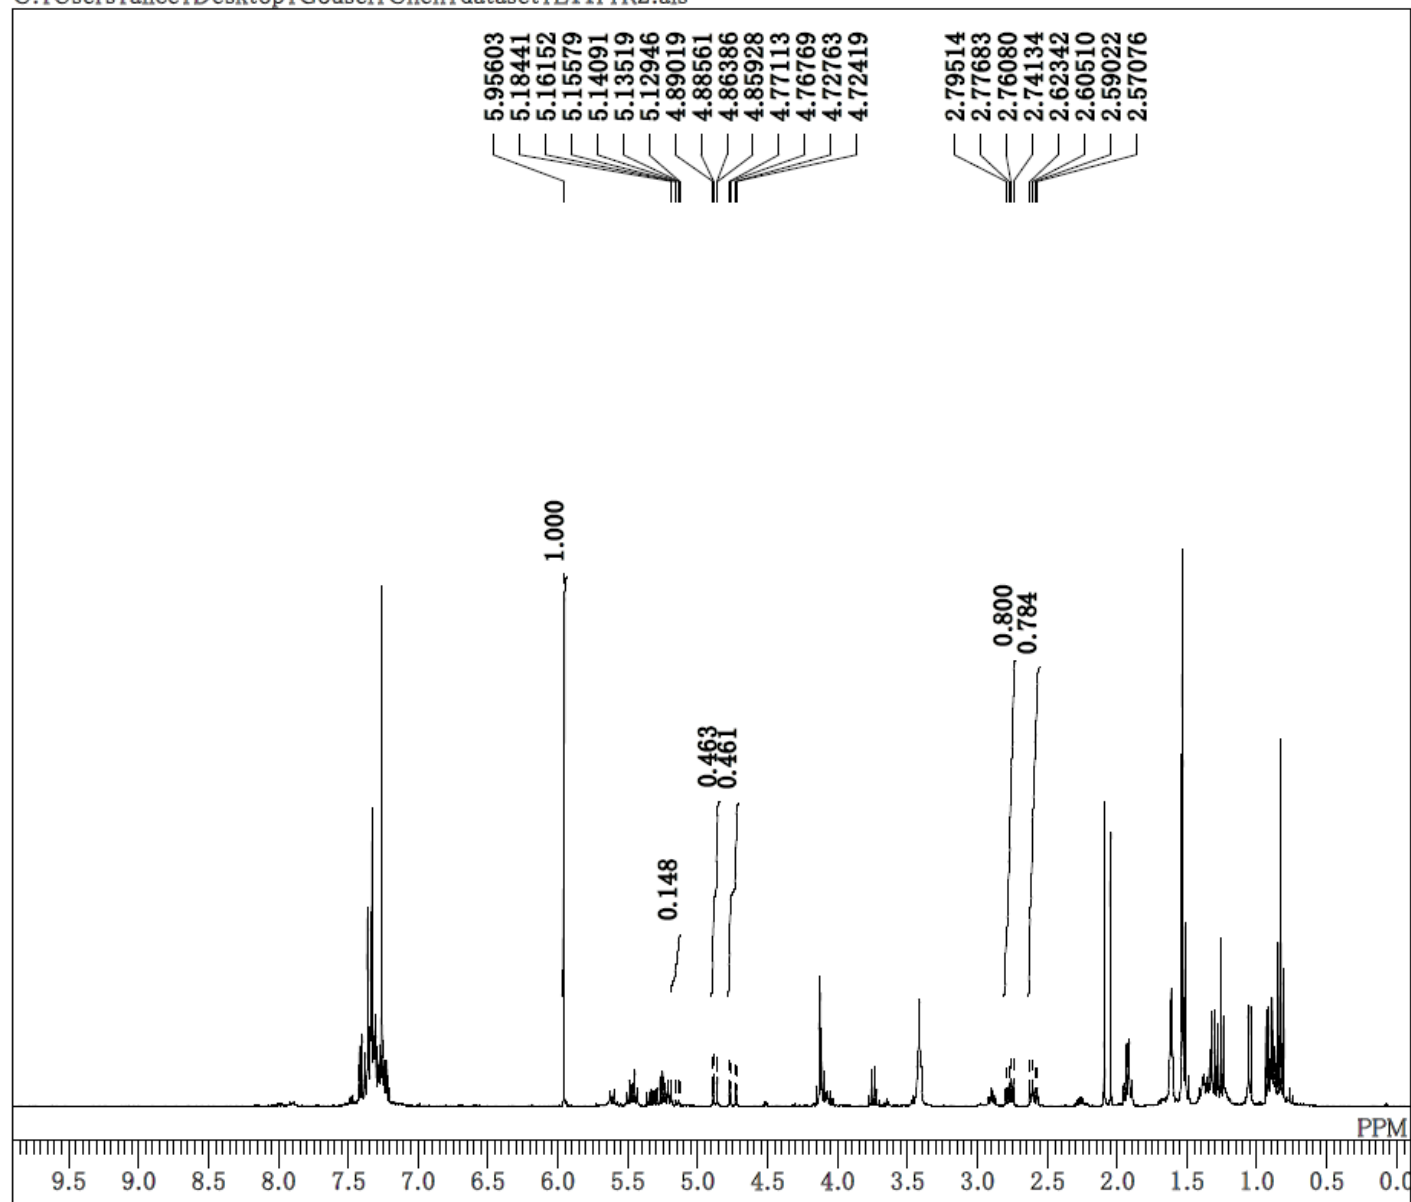

DFILE L11PrR2.als  
 COMNT  
 DATIM 04-09-2020 02:18:19  
 OBNUC 1H  
 EXMOD proton.jxp  
 OBFRQ 391.78 MHz  
 OBSET 8.51 KHz  
 OBFIN 3.34 Hz  
 POINT 13107  
 FREQU 5878.90 Hz  
 SCANS 8  
 ACQTM 2.2295 sec  
 PD 6.0000 sec  
 PW1 5.17 usec  
 IRNUC 1H  
 CTEMP 20.9 c  
 SLVNT CDCL3  
 EXREF 7.26 ppm  
 BF 0.12 Hz  
 RGAIN 38

**L11/1Pr, R**

(2<sup>nd</sup> trial)

84%, 6.2/1 dr, 1/1.5 b/l

C:\Users\Valice\Desktop\Gousei\Chen\dataset\L12EtR1.als

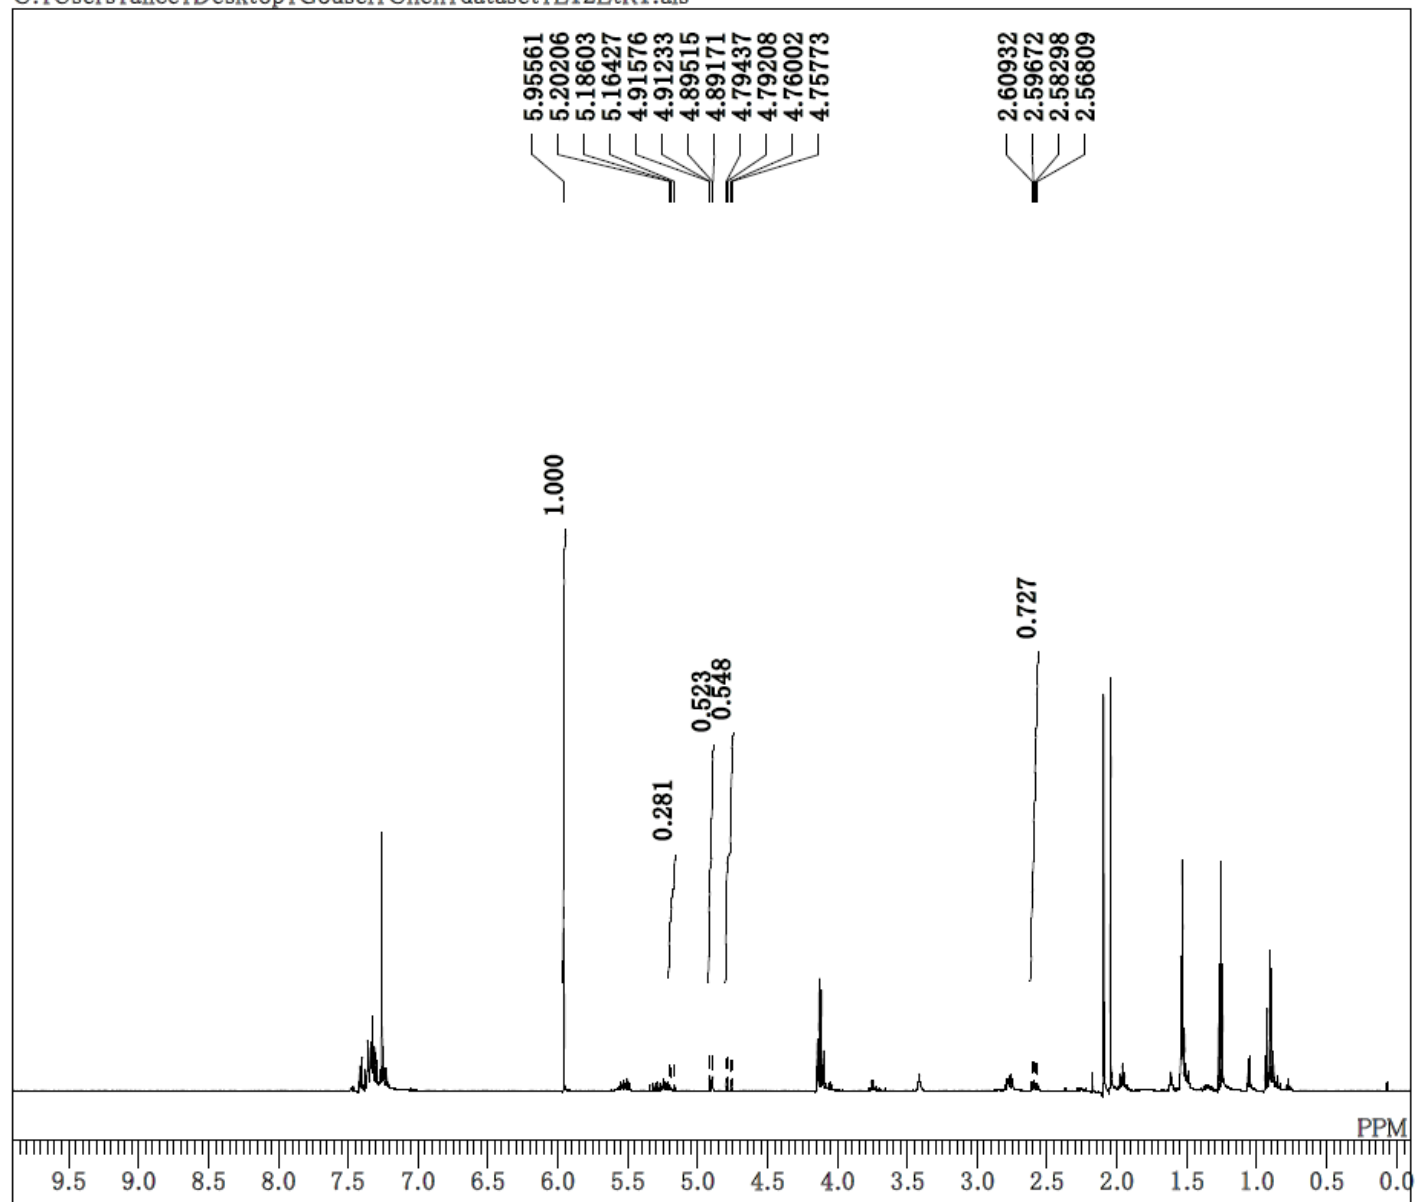

DFILE L12EtR1.als  
COMNT  
DATIM 2018-12-05 09:46:22  
OBNUC 1H  
EXMOD proton.jxp  
OBFRQ 500.16 MHz  
OBSET 2.41 KHz  
OBFIN 6.01 Hz  
POINT 13107  
FREQU 7507.51 Hz  
SCANS 8  
ACQTM 1.7459 sec  
PD 5.0000 sec  
PW1 5.55 usec  
IRNUC 1H  
CTEMP 22.0 c  
SLVNT CDCL3  
EXREF 7.26 ppm  
BF 0.12 Hz  
RGAIN 32

**L12/1Et, R**

(1<sup>st</sup> trial)

88%, 3.8/1 dr, 1/1.1 b/l



C:\Users\Valice\Desktop\Gousei\Chen\dataset\L12EtR2.als

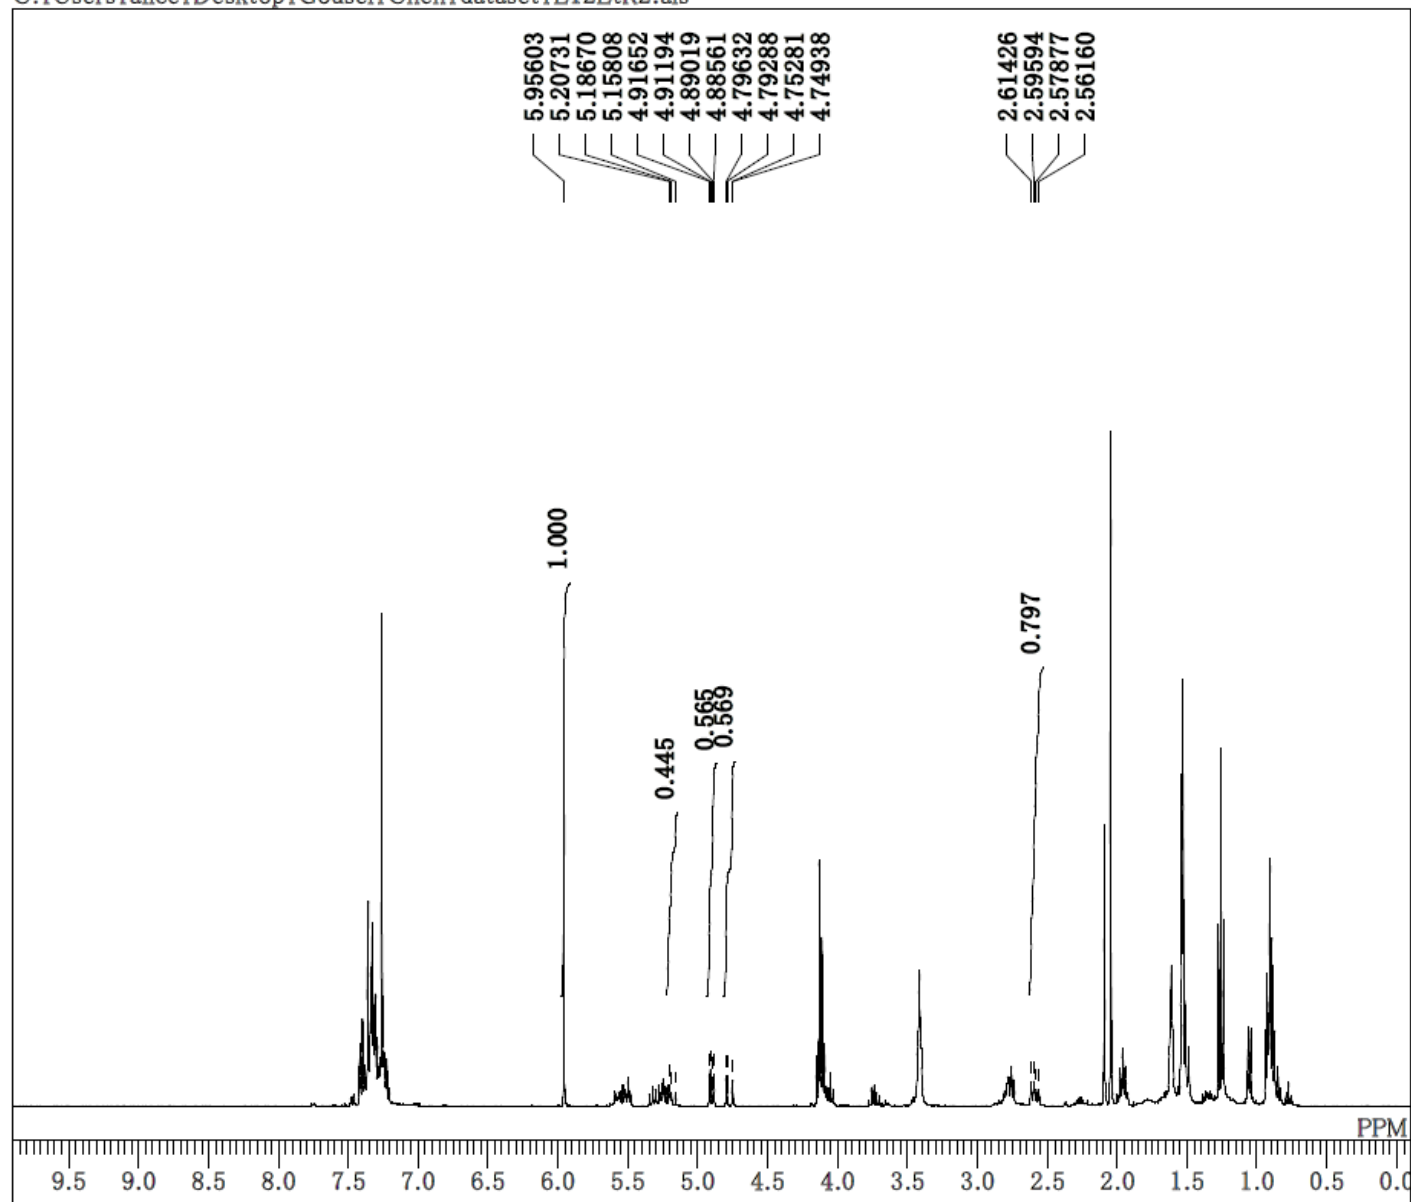

DFILE L12EtR2.als  
COMNT  
DATIM 22-08-2020 14:13:03  
OBNUC 1H  
EXMOD proton.jxp  
OBFRQ 391.78 MHz  
OBSET 8.51 KHz  
OBFIN 3.34 Hz  
POINT 13107  
FREQU 5878.90 Hz  
SCANS 8  
ACQTM 2.2295 sec  
PD 6.0000 sec  
PW1 5.17 usec  
IRNUC 1H  
CTEMP 20.8 c  
SLVNT CDCL3  
EXREF 7.26 ppm  
BF 0.62 Hz  
RGAIN 42

**L12/1Et, R**

(2<sup>nd</sup> trial)

100%, 2.5/1 dr, 1.0/1 b/l

C:\Users\Valice\Desktop\Gousei\Chen\dataset\L12PrR1.als

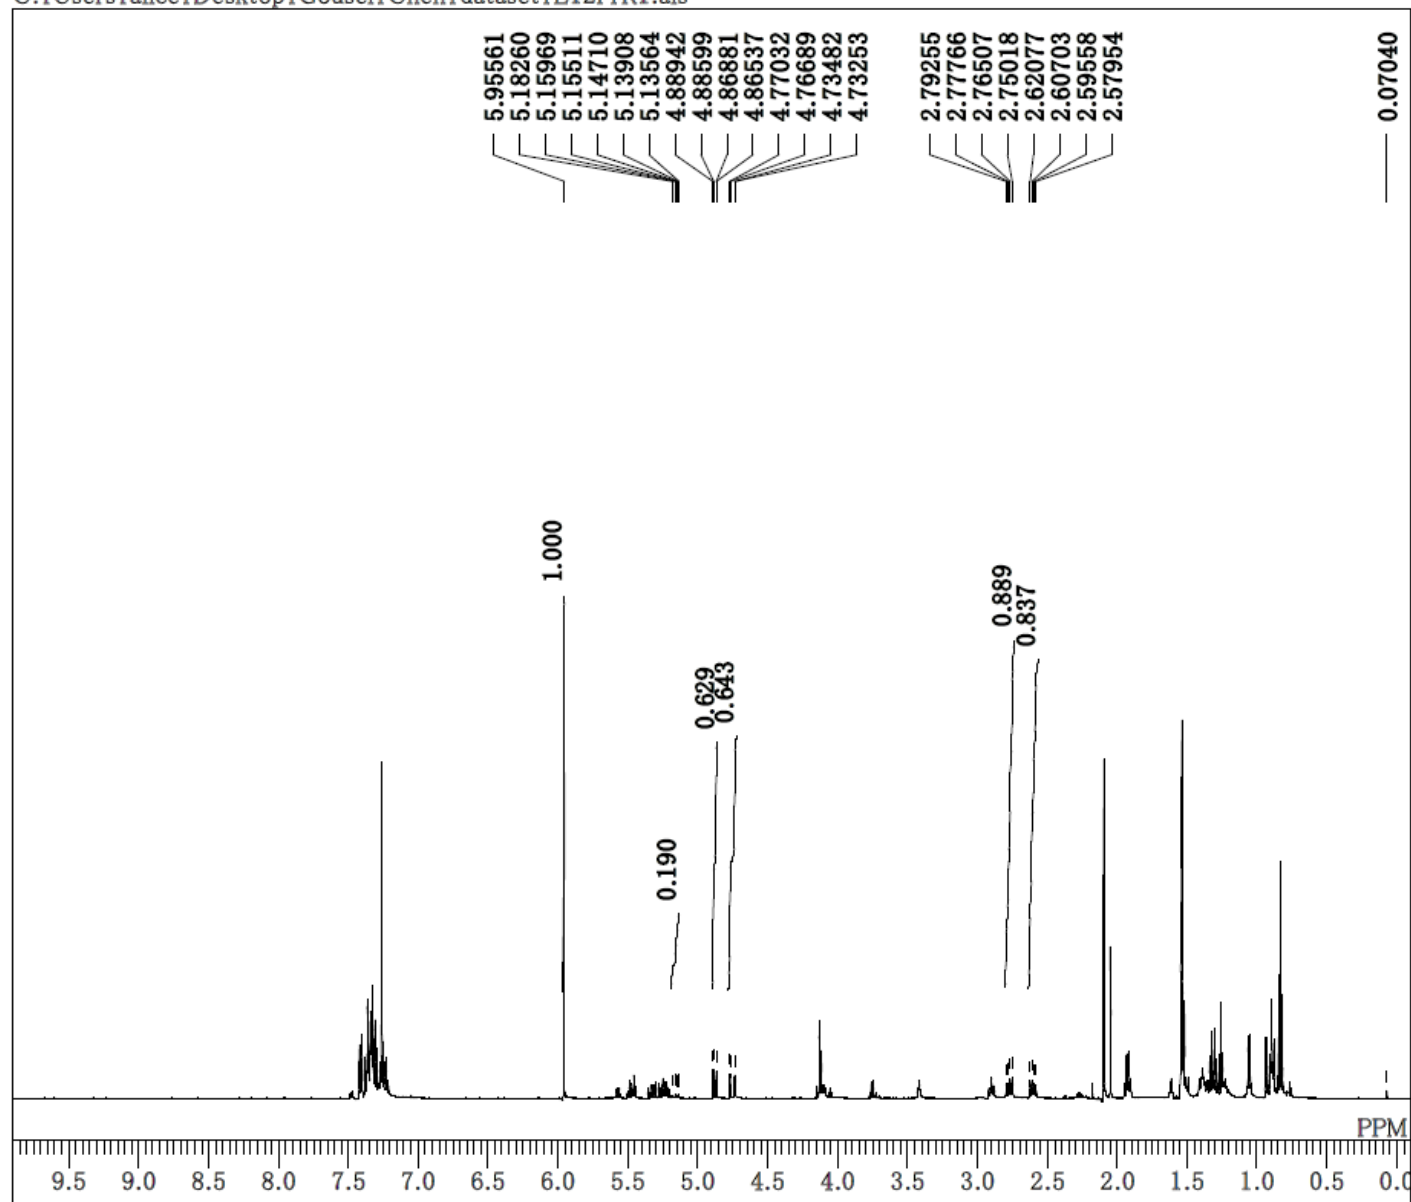

DFILE L12PrR1.als  
 COMNT  
 DATIM 2018-12-03 18:07:42  
 OBNUC 1H  
 EXMOD proton.jxp  
 OBFRQ 500.16 MHz  
 OBSET 2.41 KHz  
 OBFIN 6.01 Hz  
 POINT 13107  
 FREQU 7507.51 Hz  
 SCANS 8  
 ACQTM 1.7459 sec  
 PD 5.0000 sec  
 PW1 5.55 usec  
 IRNUC 1H  
 CTEMP 21.7 c  
 SLVNT CDCL3  
 EXREF 7.26 ppm  
 BF 0.12 Hz  
 RGAIN 32

**L12/1Pr, R**

(1<sup>st</sup> trial)

100%, 6.7/1 dr, 1/1.2 b/l

C:\Users\Valice\Desktop\Gousei\Chen\dataset\L12PrR2.als

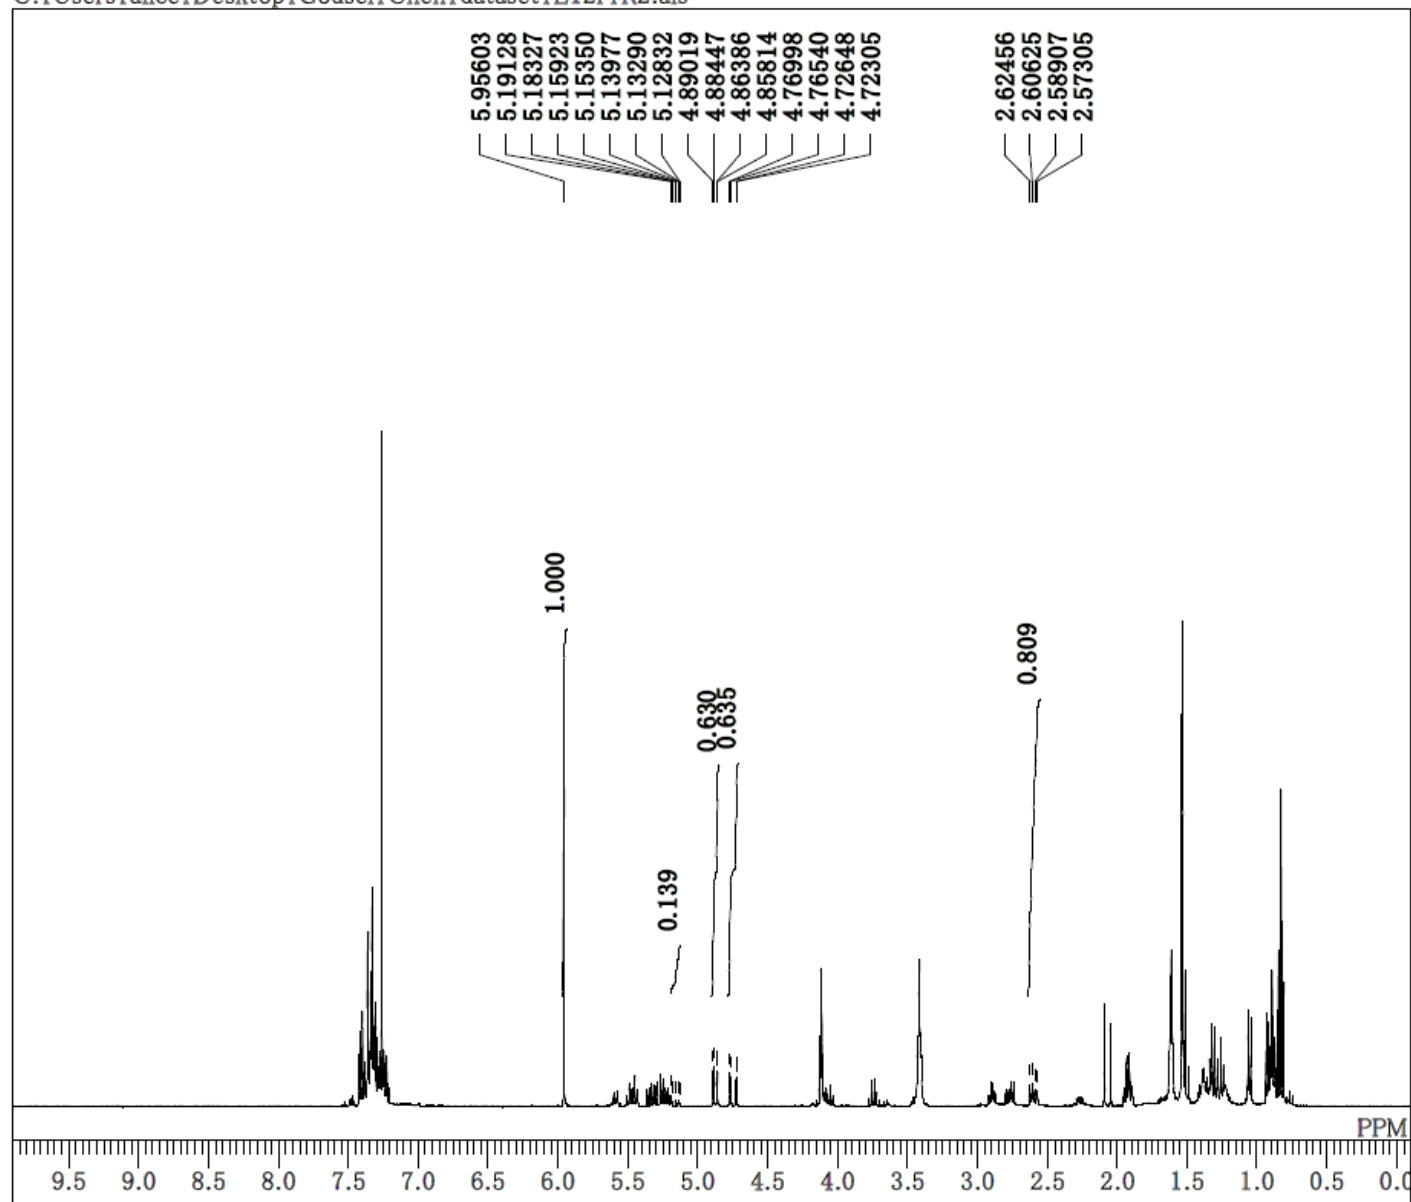

DFILE L12PrR2.als  
 COMNT  
 DATIM 23-08-2020 22:11:47  
 OBNUC 1H  
 EXMOD proton.jxp  
 OBFRQ 391.78 MHz  
 OBSET 8.51 KHz  
 OBFIN 3.34 Hz  
 POINT 13107  
 FREQU 5878.90 Hz  
 SCANS 8  
 ACQTM 2.2295 sec  
 PD 6.0000 sec  
 PW1 5.17 usec  
 IRNUC 1H  
 CTEMP 20.4 c  
 SLVNT CDCL3  
 EXREF 7.26 ppm  
 BF 0.12 Hz  
 RGAIN 40

**L12/1Pr, R**

(2<sup>nd</sup> trial)

95%, 9.1/1 dr, 1/1.2 b/l

C:\Users\Valice\Desktop\Gousei\Chen\dataset\L13EtS1.als

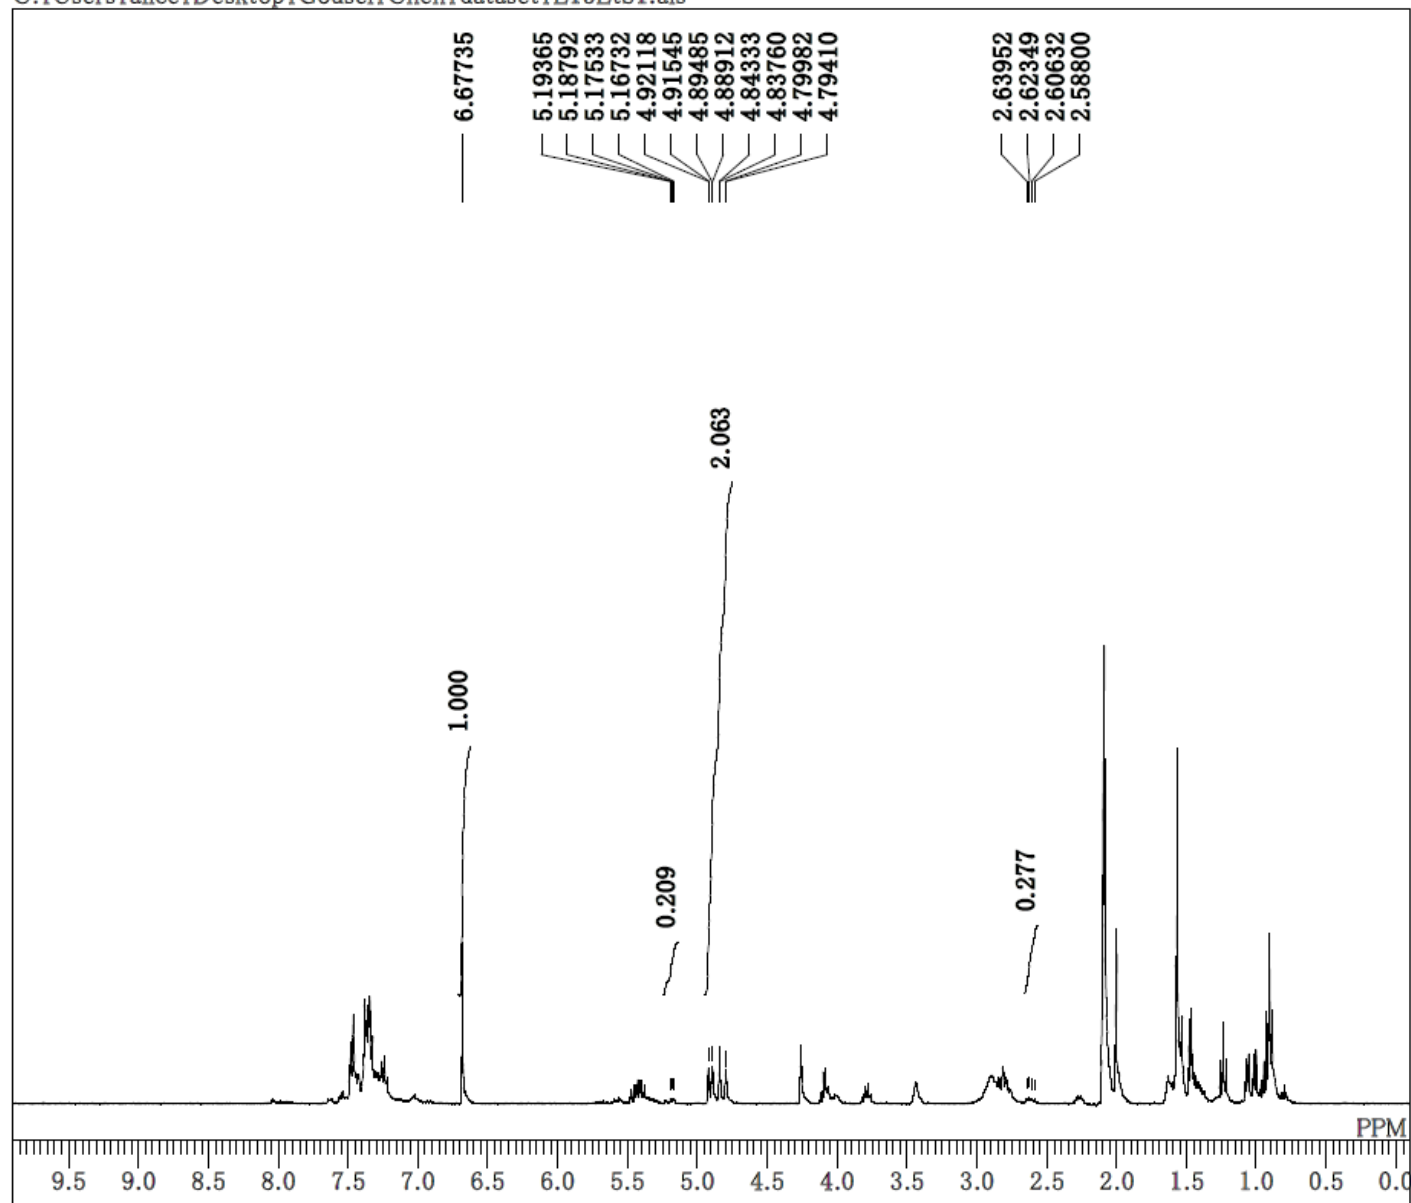

DFILE L13EtS1.als  
COMNT  
DATIM 16-12-2018 20:38:15  
OBNUC 1H  
EXMOD proton.jxp  
OBFRQ 391.78 MHz  
OBSET 8.51 KHz  
OBFIN 3.34 Hz  
POINT 13107  
FREQU 5878.90 Hz  
SCANS 8  
ACQTM 2.2295 sec  
PD 5.0000 sec  
PW1 5.22 usec  
IRNUC 1H  
CTEMP 19.9 c  
SLVNT ACETN  
EXREF 2.09 ppm  
BF 0.12 Hz  
RGAIN 44

**L13/1Et, R**

(1<sup>st</sup> trial)

89%, 9.9/1 dr, 4.1/1 b/l

C:\Users\Valice\Desktop\Gousei\Chen\dataset\L13EtR2.als

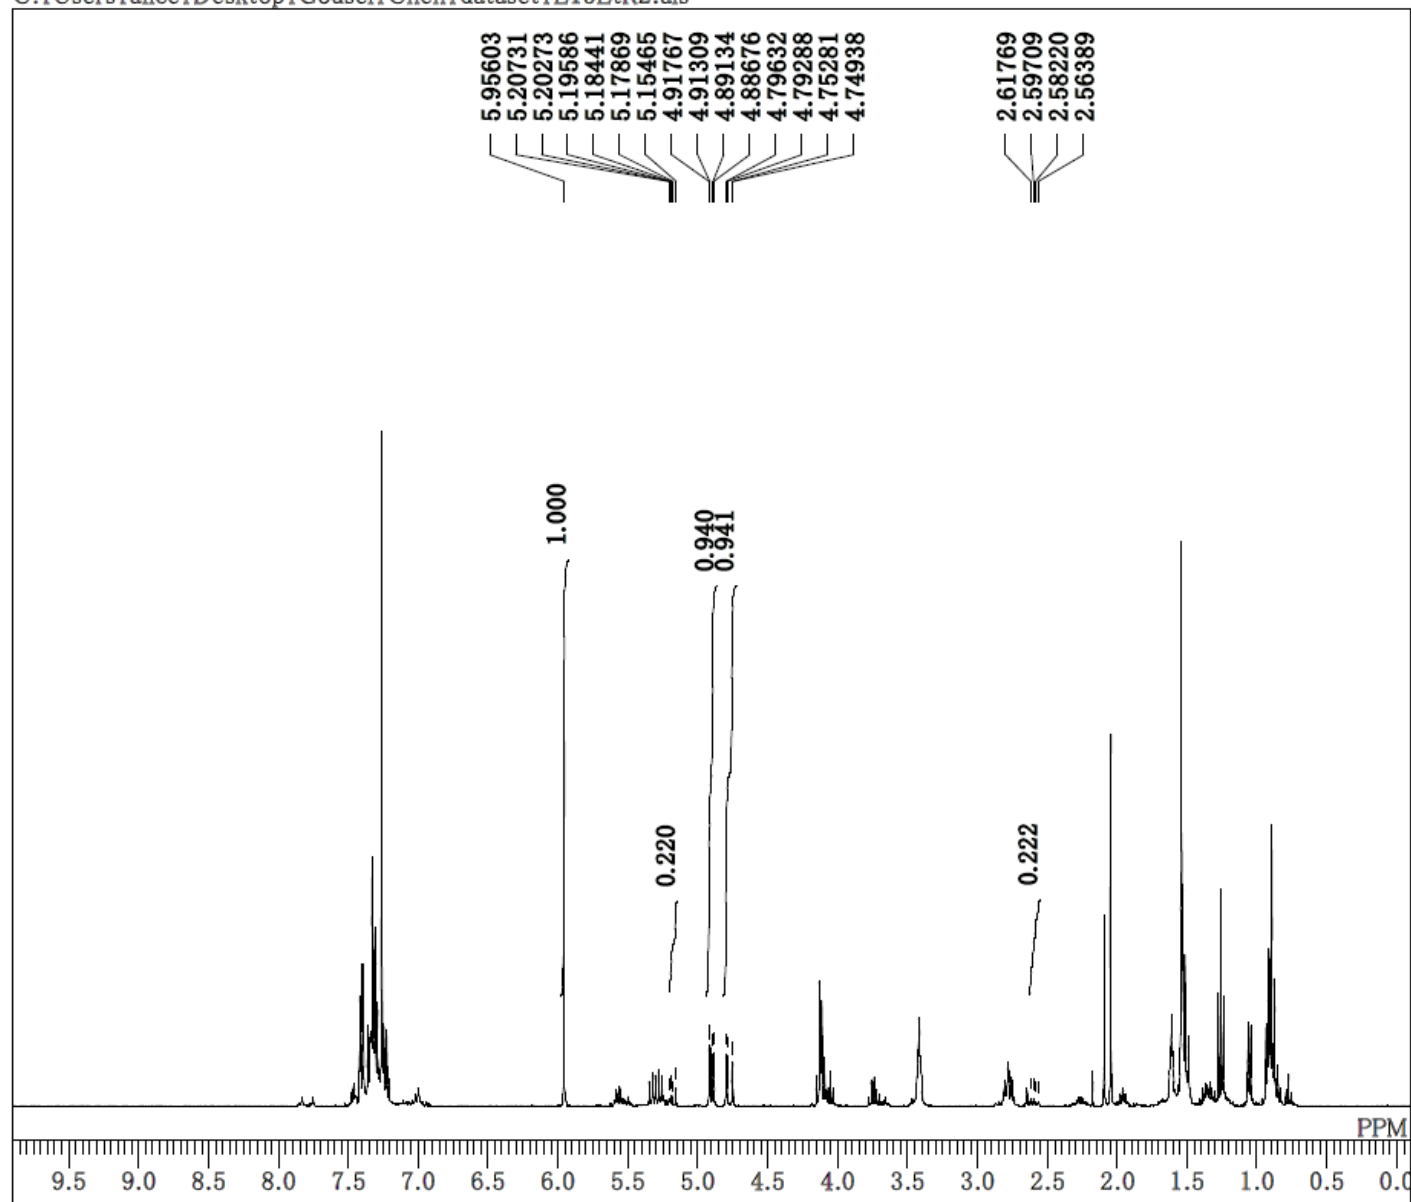

DFILE L13EtR2.als  
COMNT  
DATIM 26-08-2020 23:08:20  
OBNUC 1H  
EXMOD proton.jxp  
OBFRQ 391.78 MHz  
OBSET 8.51 KHz  
OBFIN 3.34 Hz  
POINT 13107  
FREQU 5878.90 Hz  
SCANS 8  
ACQTM 2.2295 sec  
PD 6.0000 sec  
PW1 5.17 usec  
IRNUC 1H  
CTEMP 21.0 c  
SLVNT CDCL3  
EXREF 7.26 ppm  
BF 0.42 Hz  
RGAIN 44

**L13/1Et, R**

(2<sup>nd</sup> trial)

80%, 8.5/1 dr, 4.7/1 b/l

C:\Users\Valice\Desktop\Gousei\Chen\dataset\L13PrR1.als

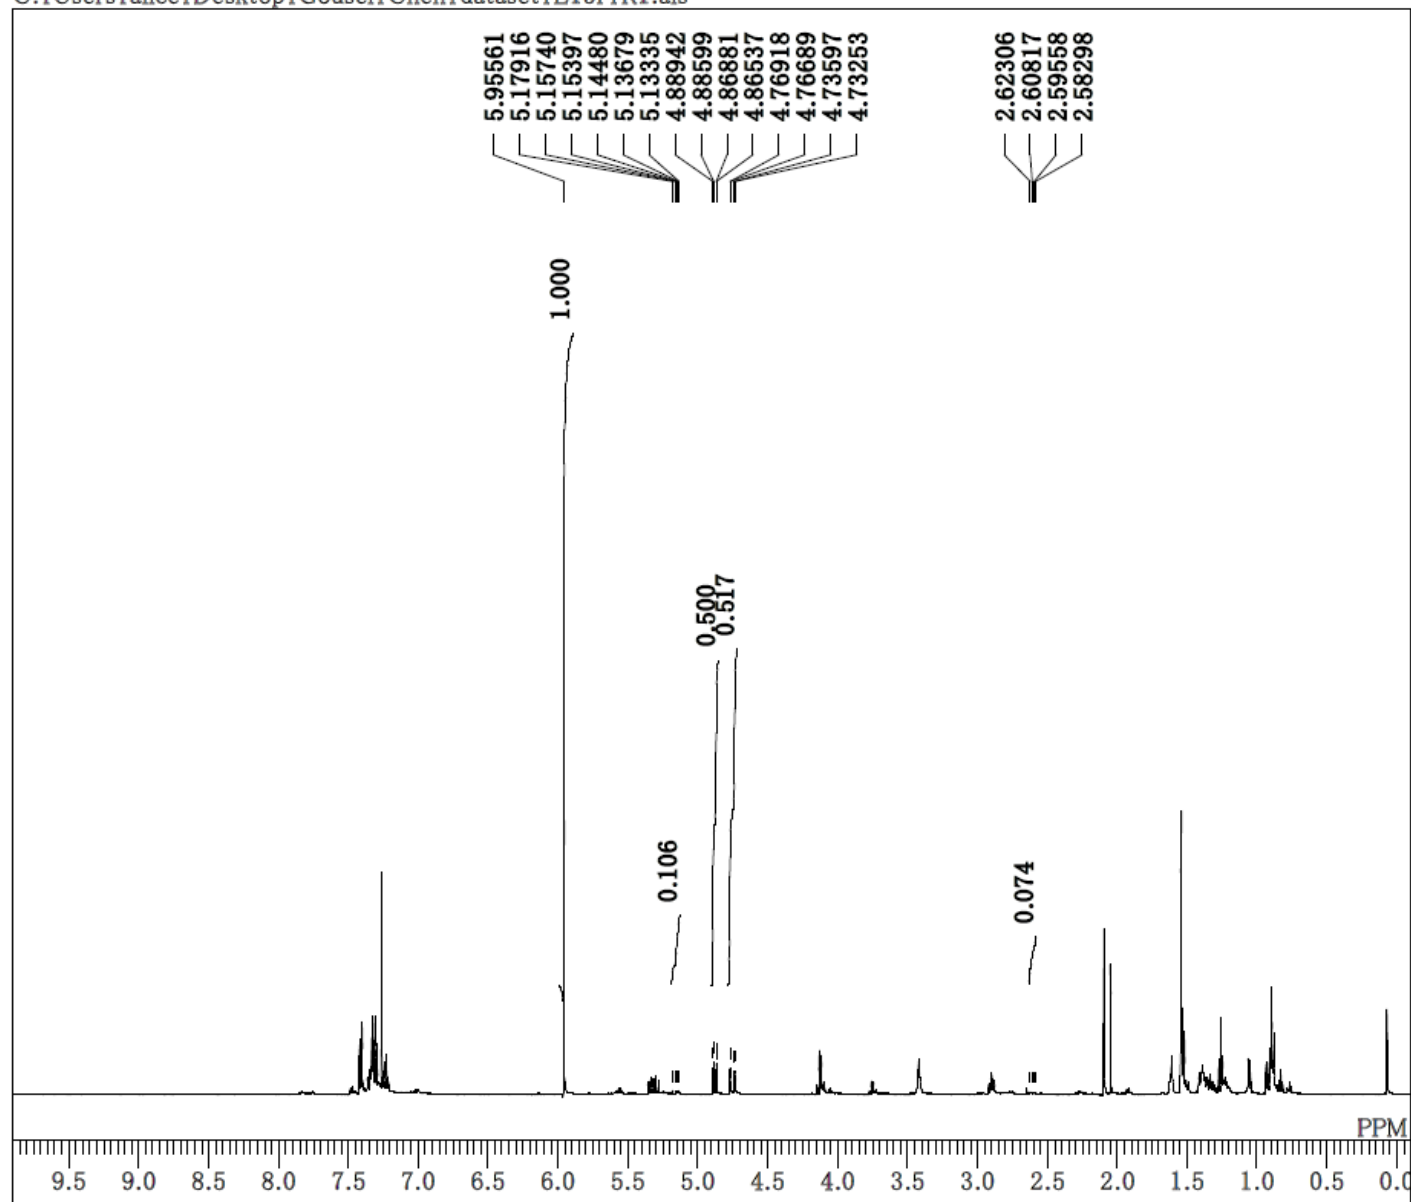

DFILE L13PrR1.als  
COMNT  
DATIM 2018-04-27 20:08:02  
OBNUC 1H  
EXMOD proton.jxp  
OBFRQ 500.16 MHz  
OBSET 2.41 KHz  
OBFIN 6.01 Hz  
POINT 13107  
FREQU 7507.51 Hz  
SCANS 17  
ACQTM 1.7459 sec  
PD 5.0000 sec  
PW1 5.55 usec  
IRNUC 1H  
CTEMP 21.4 c  
SLVNT CDCL3  
EXREF 7.26 ppm  
BF 0.12 Hz  
RGAIN 30

**L13/1Pr, *R***

(1<sup>st</sup> trial)

81%, 10.0/1 dr, 9.9/1 b/l

C:\Users\Valice\Desktop\Gousei\Chen\dataset\L13PrR2.als

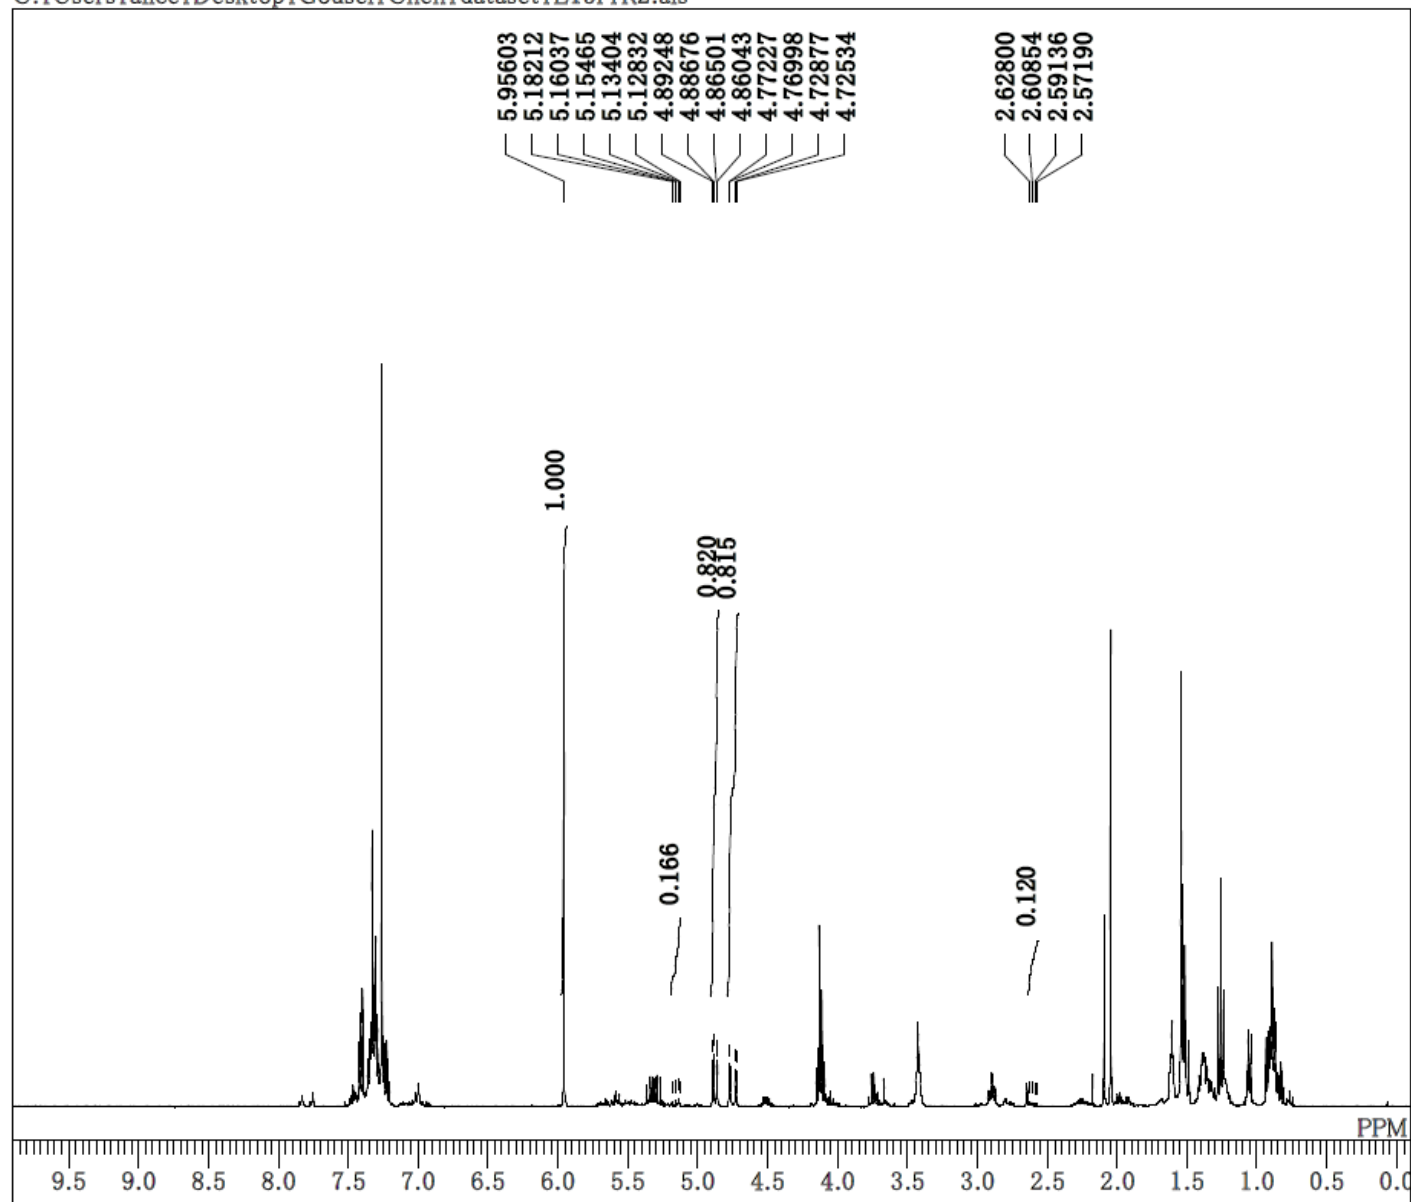

DFILE L13PrR2.als  
 COMNT  
 DATIM 26-08-2020 23:16:22  
 OBNUC 1H  
 EXMOD proton.jxp  
 OBFRQ 391.78 MHz  
 OBSET 8.51 KHz  
 OBFIN 3.34 Hz  
 POINT 13107  
 FREQU 5878.90 Hz  
 SCANS 8  
 ACQTM 2.2295 sec  
 PD 6.0000 sec  
 PW1 5.17 usec  
 IRNUC 1H  
 CTEMP 20.9 c  
 SLVNT CDCL3  
 EXREF 7.26 ppm  
 BF 0.42 Hz  
 RGAIN 44

**L13/1Pr, R**  
 (2<sup>nd</sup> trial)  
 64%, 9.8/1 dr, 7.5/1 b/l

C:\Users\Valice\Desktop\Gousei\Chen\dataset\L14EtR1.als

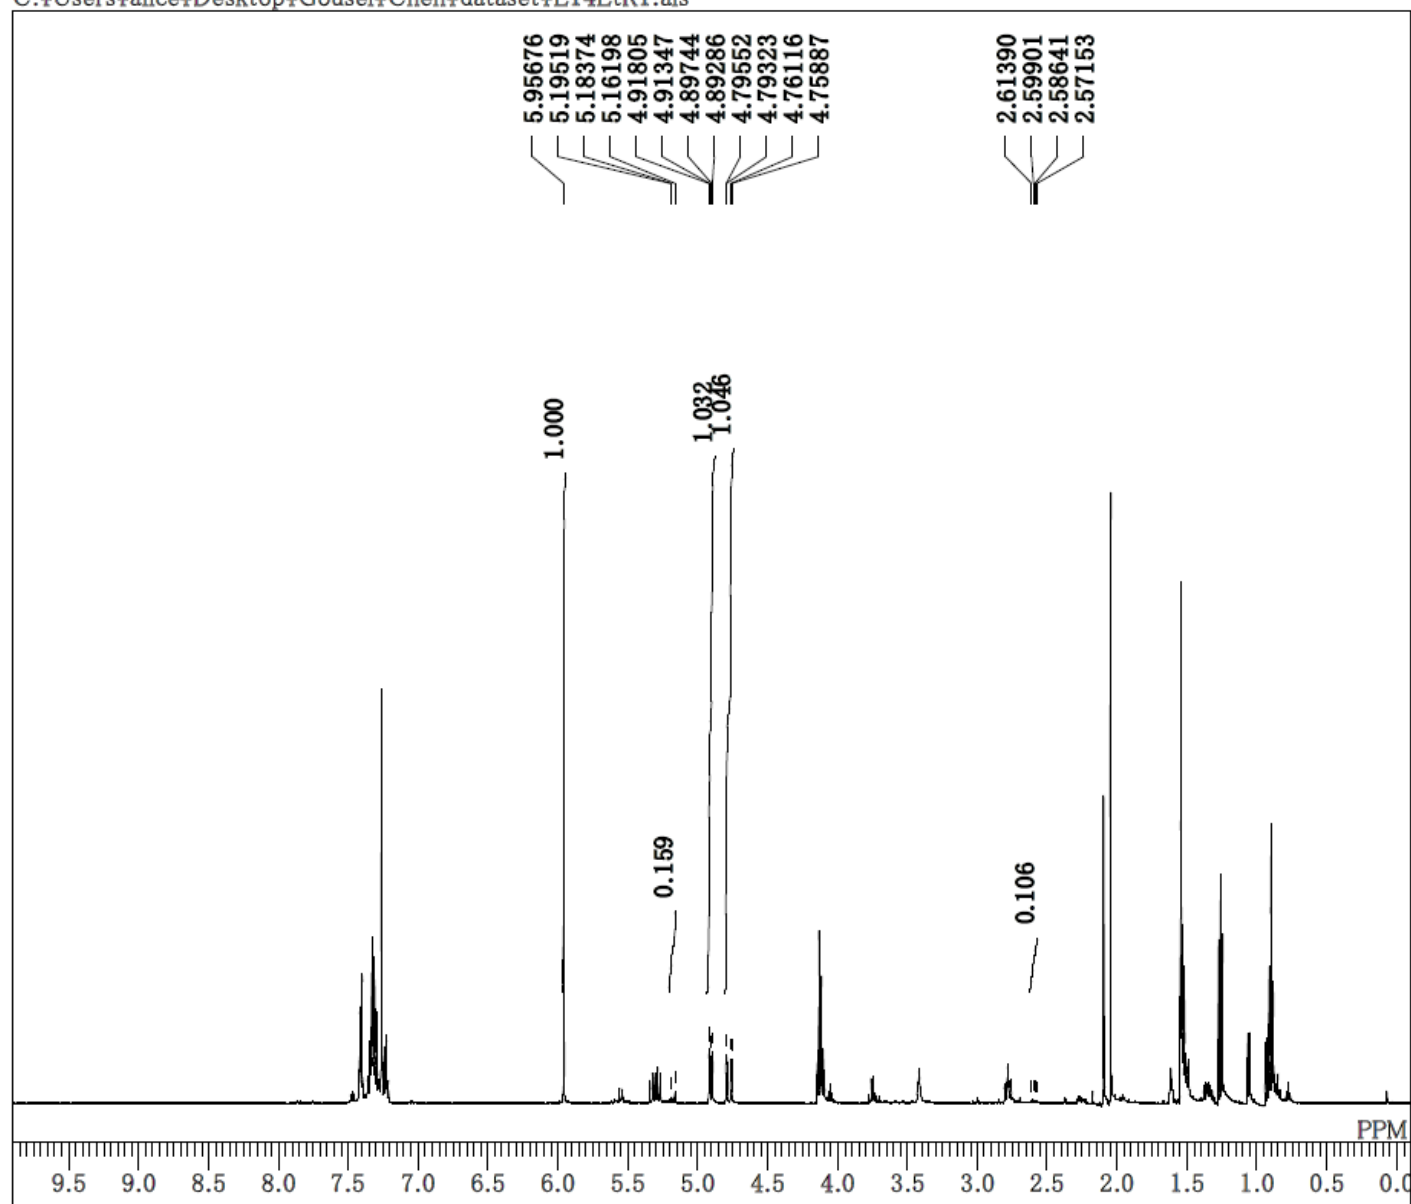

DFILE L14EtR1.als  
COMNT  
DATIM 2019-09-19 14:07:33  
OBNUC 1H  
EXMOD proton.jxp  
OBFRQ 500.16 MHz  
OBSET 2.41 KHz  
OBFIN 6.01 Hz  
POINT 13107  
FREQU 7507.51 Hz  
SCANS 8  
ACQTM 1.7459 sec  
PD 6.0000 sec  
PW1 5.55 usec  
IRNUC 1H  
CTEMP 21.8 c  
SLVNT CDCL3  
EXREF 7.26 ppm  
BF 0.12 Hz  
RGAIN 42

**L14/1Et, R**

(1<sup>st</sup> trial)

77%, 13.1/1 dr, 11.0/1 b/l



C:\Users\Valice\Desktop\Gousei\Chen\dataset\L14EtS2.als

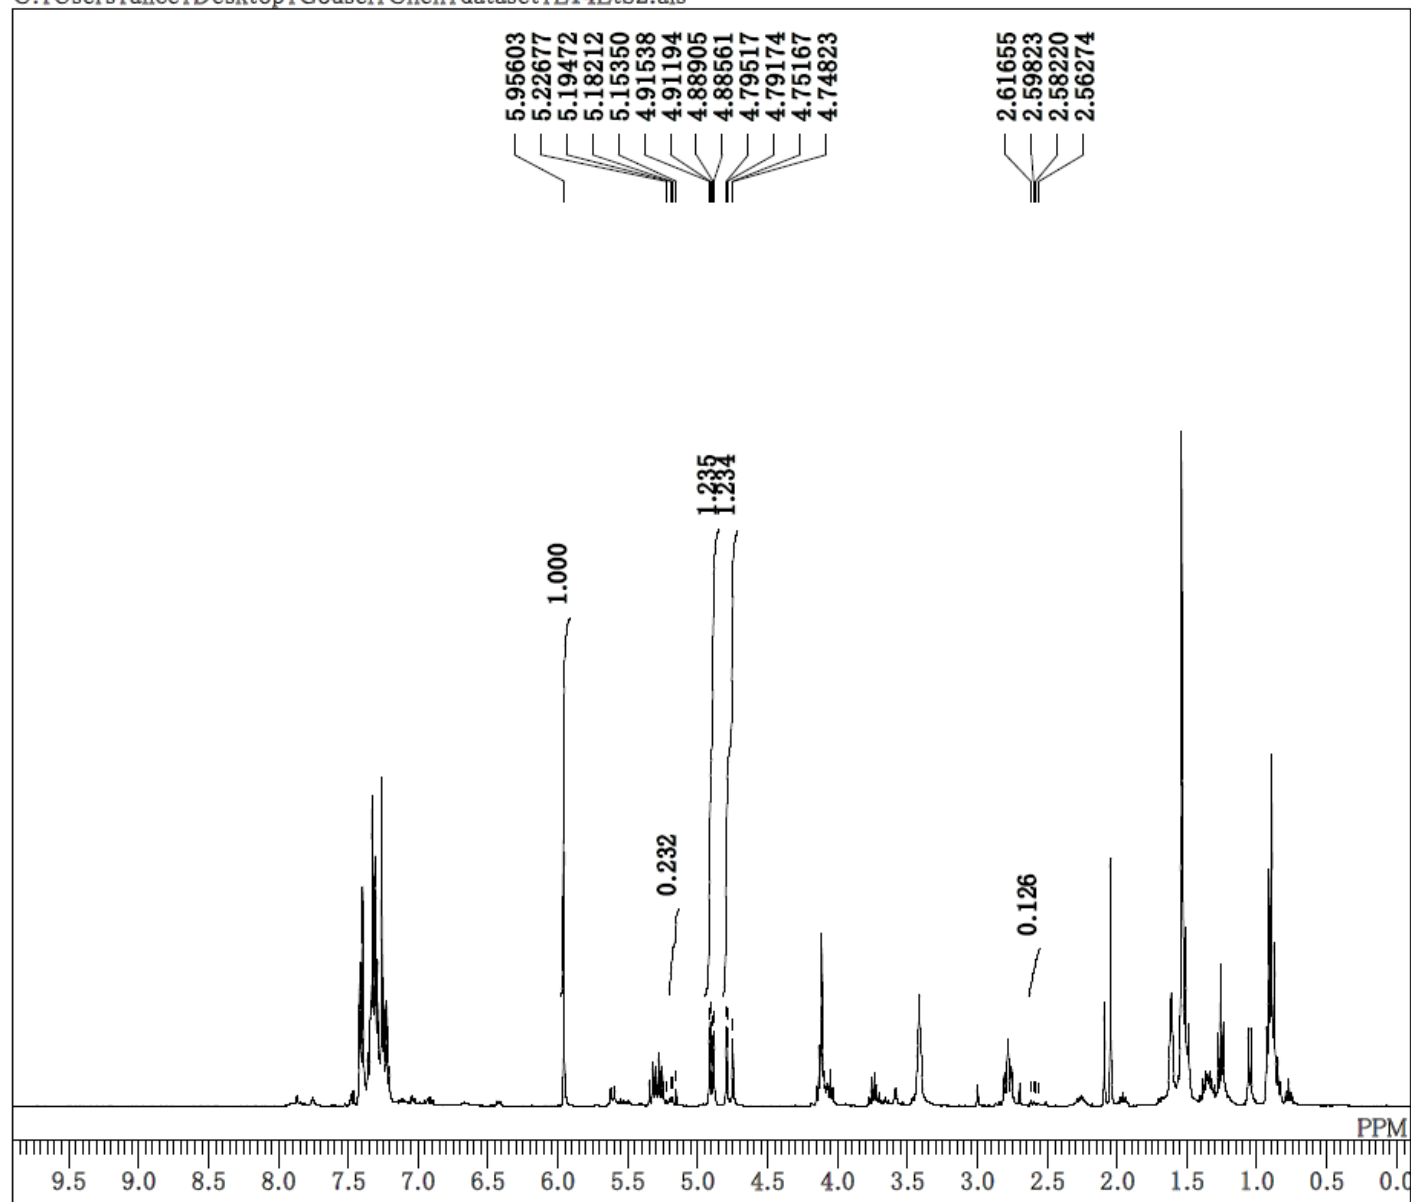

DFILE L14EtS2.als  
COMNT  
DATIM 07-09-2020 18:58:20  
OBNUC 1H  
EXMOD proton.jxp  
OBFRQ 391.78 MHz  
OBSET 8.51 KHz  
OBFIN 3.34 Hz  
POINT 13107  
FREQU 5878.90 Hz  
SCANS 8  
ACQTM 2.2295 sec  
PD 6.0000 sec  
PW1 5.17 usec  
IRNUC 1H  
CTEMP 20.4 c  
SLVNT CDCL3  
EXREF 7.26 ppm  
BF 1.20 Hz  
RGAIN 40

**L14/1Et, R**

(2<sup>nd</sup> trial)

93%, 10.6/1 dr, 10.7/1 b/l

C:\Users\Valice\Desktop\Gousei\Chen\dataset\L14PrR1.als

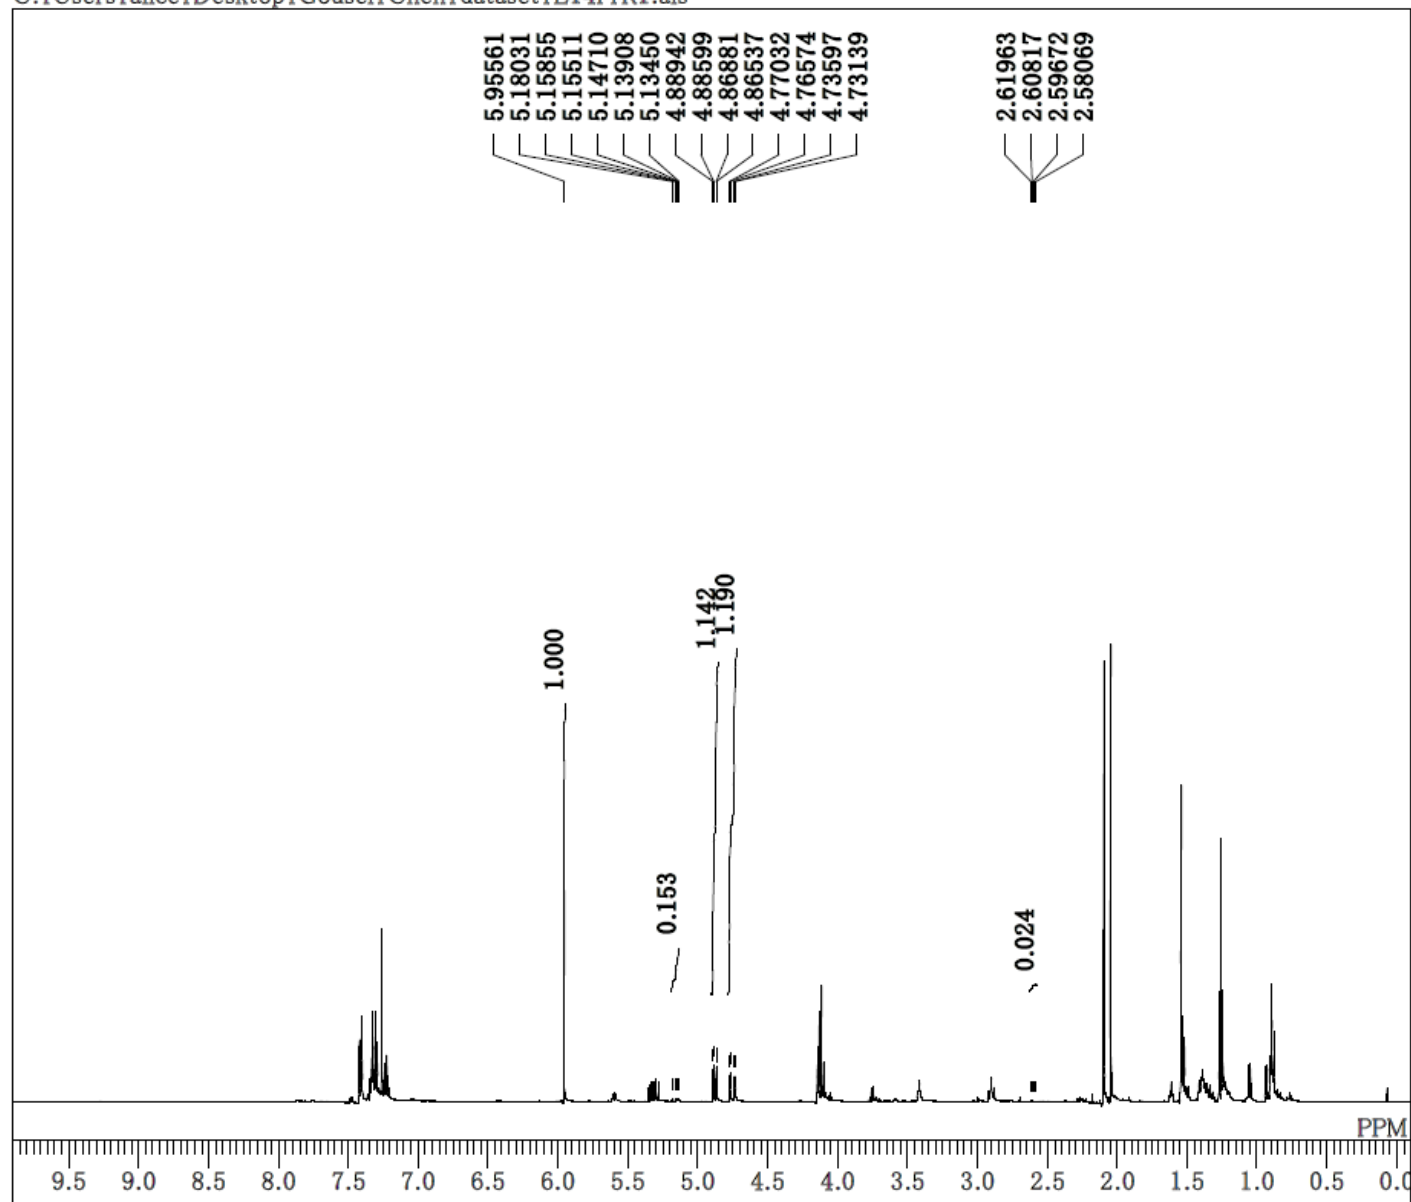

DFILE L14PrR1.als  
COMNT  
DATIM 2019-09-19 14:23:05  
OBNUC 1H  
EXMOD proton.jxp  
OBFRQ 500.16 MHz  
OBSET 2.41 KHz  
OBFIN 6.01 Hz  
POINT 13107  
FREQU 7507.51 Hz  
SCANS 8  
ACQTM 1.7459 sec  
PD 6.0000 sec  
PW1 5.55 usec  
IRNUC 1H  
CTEMP 22.0 c  
SLVNT CDCL3  
EXREF 7.26 ppm  
BF 0.12 Hz  
RGAIN 40

**L14/1Pr, R**

(1<sup>st</sup> trial)

80%, 15.2/1 dr, >50/1 b/l

C:\Users\Valice\Desktop\Gousei\Chen\dataset\L14PrS2.als

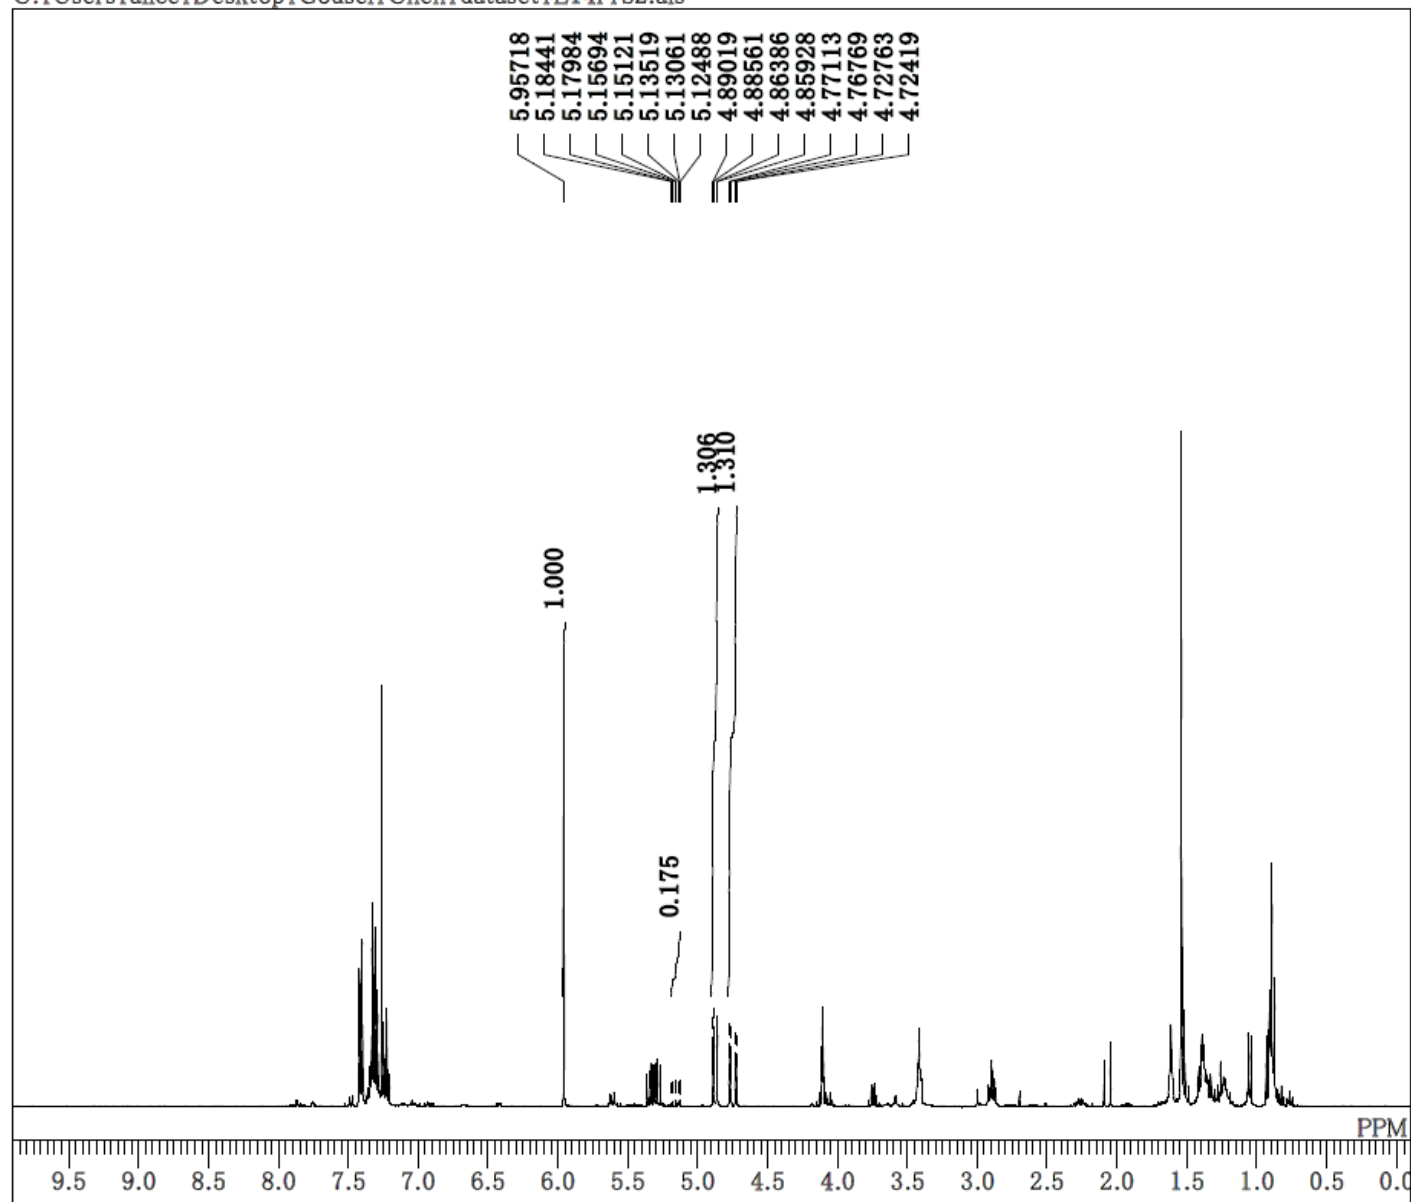

DFILE L14PrS2.als  
COMNT  
DATIM 07-09-2020 22:56:10  
OBNUC 1H  
EXMOD proton.jxp  
OBFRQ 391.78 MHz  
OBSET 8.51 KHz  
OBFIN 3.34 Hz  
POINT 13107  
FREQU 5878.90 Hz  
SCANS 8  
ACQTM 2.2295 sec  
PD 6.0000 sec  
PW1 5.17 usec  
IRNUC 1H  
CTEMP 20.3 c  
SLVNT CDCL3  
EXREF 7.26 ppm  
BF 0.12 Hz  
RGAIN 40

**L14/1Pr, R**

(2<sup>nd</sup> trial)

88%, 14.9/1 dr, >50/1 b/l

C:\Users\Valice\Desktop\Gousei\Chen\dataset\L15EtR1.als

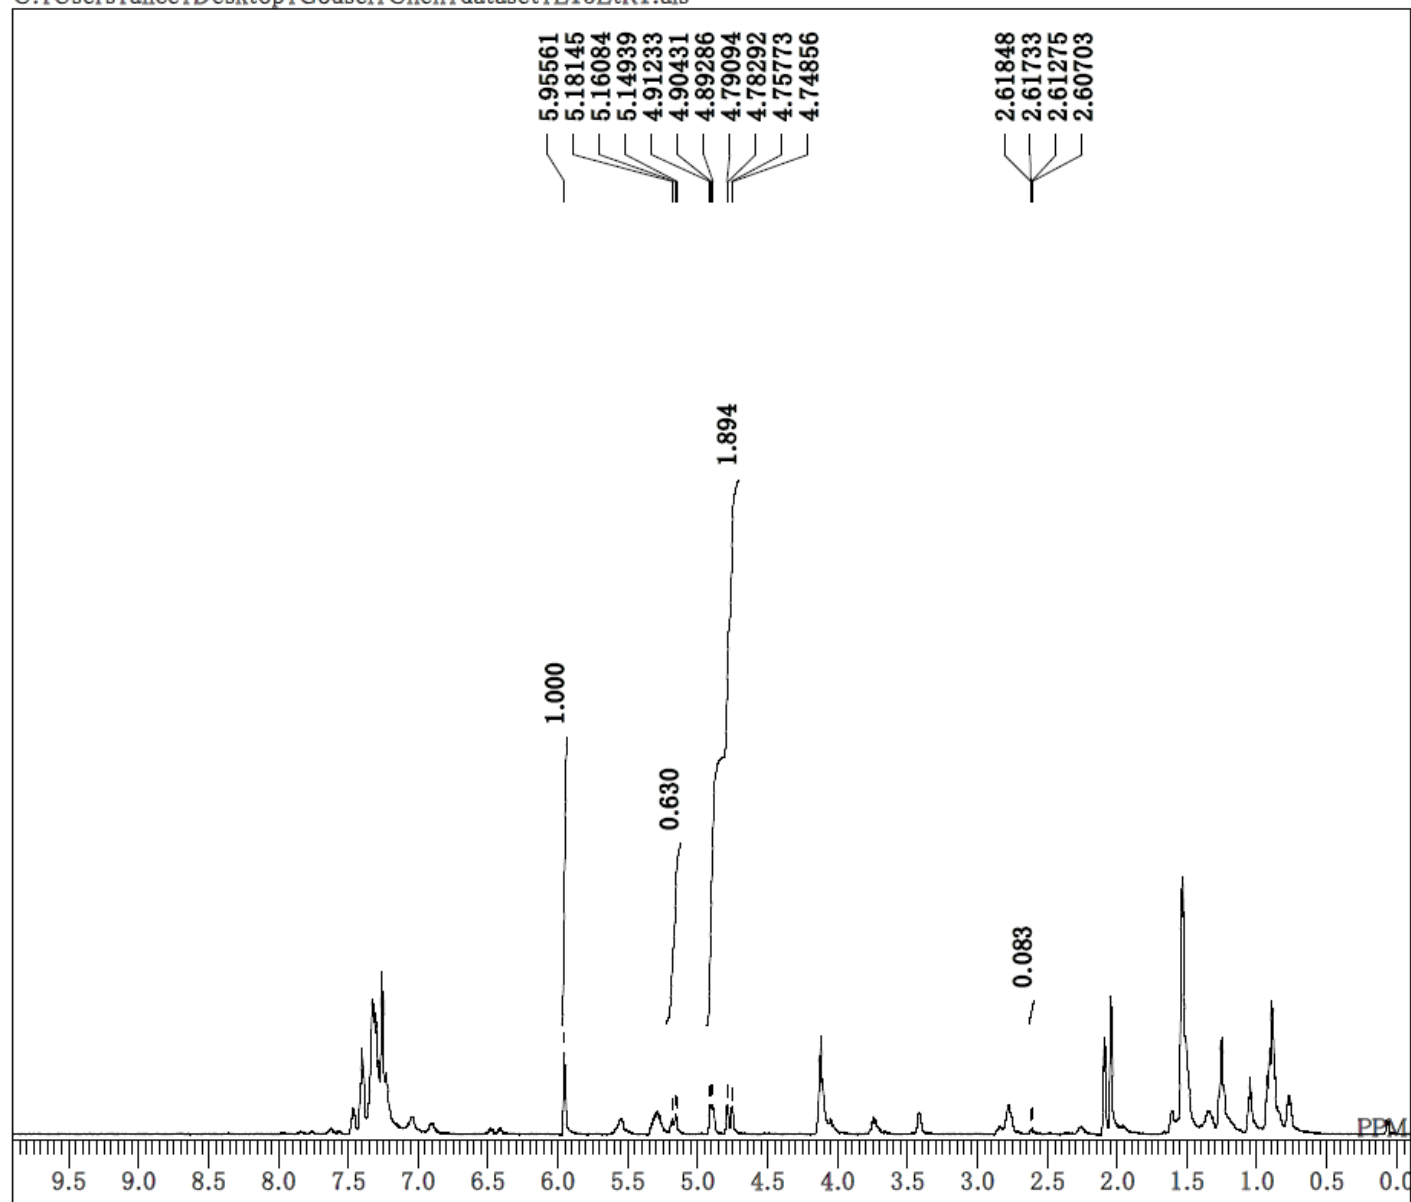

DFILE L15EtR1.als  
COMNT  
DATIM 2019-01-16 15:08:19  
OBNUC 1H  
EXMOD proton.jxp  
OBFRQ 500.16 MHz  
OBSET 2.41 KHz  
OBFIN 6.01 Hz  
POINT 13107  
FREQU 7507.51 Hz  
SCANS 8  
ACQTM 1.7459 sec  
PD 6.0000 sec  
PW1 5.55 usec  
IRNUC 1H  
CTEMP 21.7 c  
SLVNT CDCL3  
EXREF 7.26 ppm  
BF 0.12 Hz  
RGAIN 30

**L15/1Et, *R***

(1<sup>st</sup> trial)

85%, 3.0/1 dr, 19.8/1 b/l

C:\Users\Valice\Desktop\Gousei\Chen\dataset\L15EtR2.als

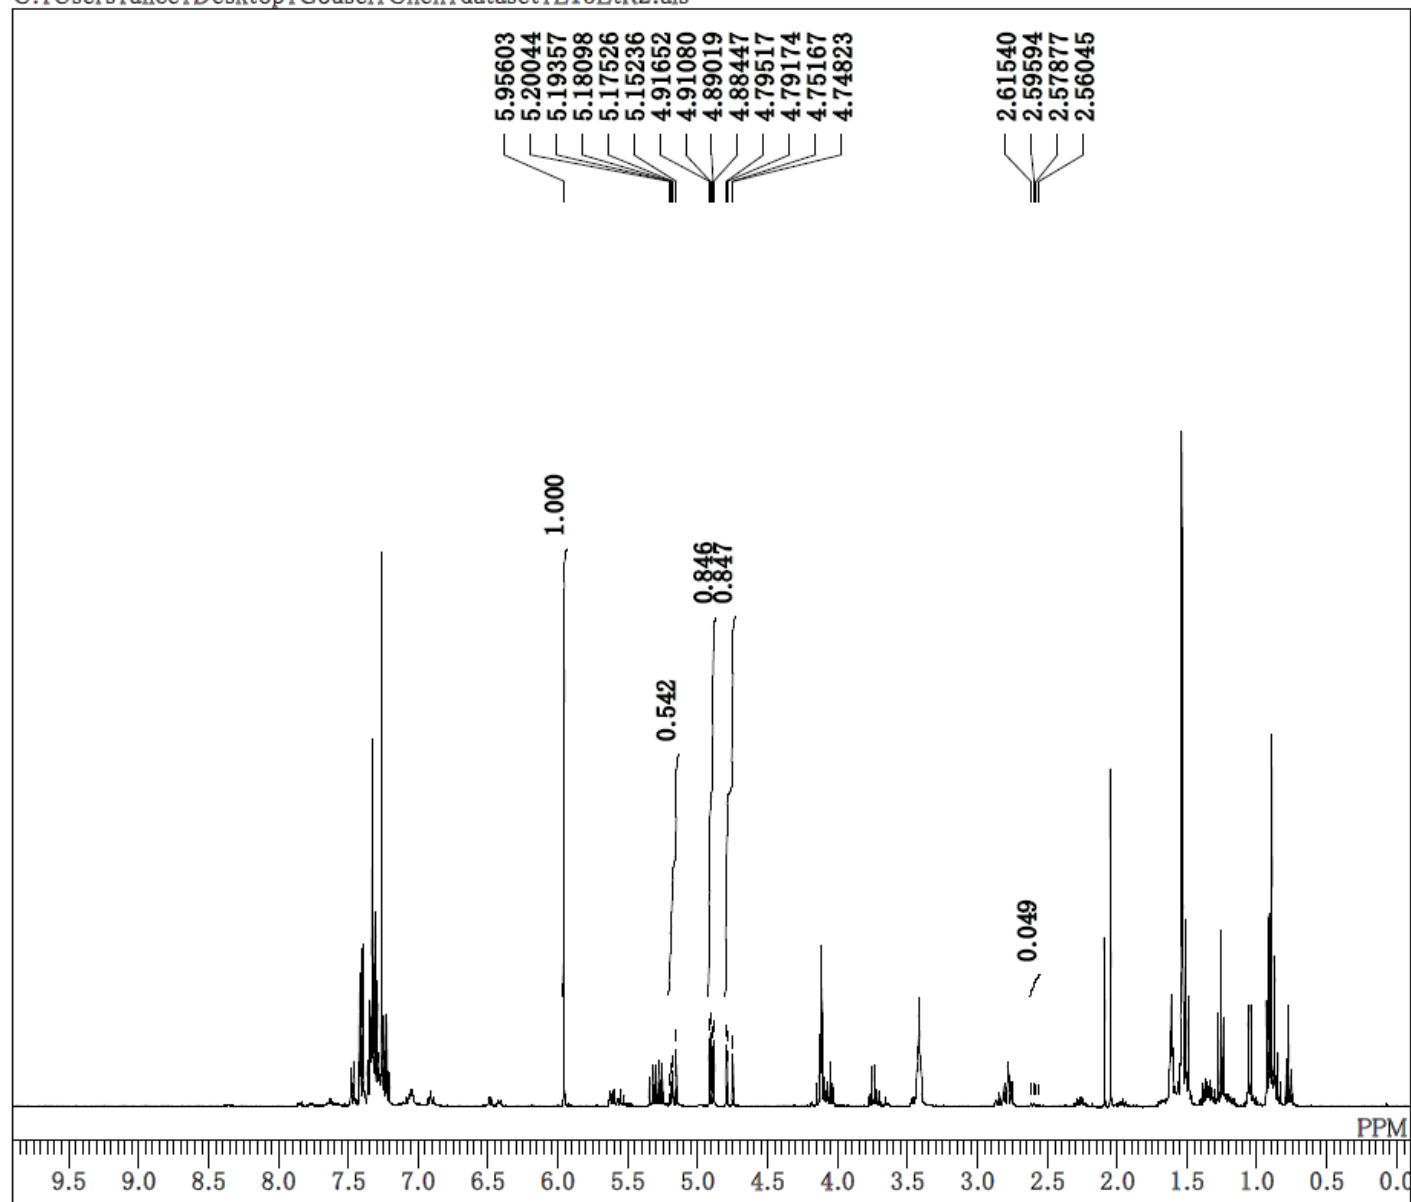

DFILE L15EtR2.als  
 COMNT  
 DATIM 07-09-2020 22:39:16  
 OBNUC 1H  
 EXMOD proton.jxp  
 OBFRQ 391.78 MHz  
 OBSET 8.51 KHz  
 OBFIN 3.34 Hz  
 POINT 13107  
 FREQU 5878.90 Hz  
 SCANS 8  
 ACQTM 2.2295 sec  
 PD 6.0000 sec  
 PW1 5.17 usec  
 IRNUC 1H  
 CTEMP 20.3 c  
 SLVNT CDCL3  
 EXREF 7.26 ppm  
 BF 0.12 Hz  
 RGAIN 38

**L15/1Et, R**

(2<sup>nd</sup> trial)

73%, 3.1/1 dr, 22.8/1 b/l

C:\Users\Valice\Desktop\Gousei\Chen\dataset\L15PrR1.als

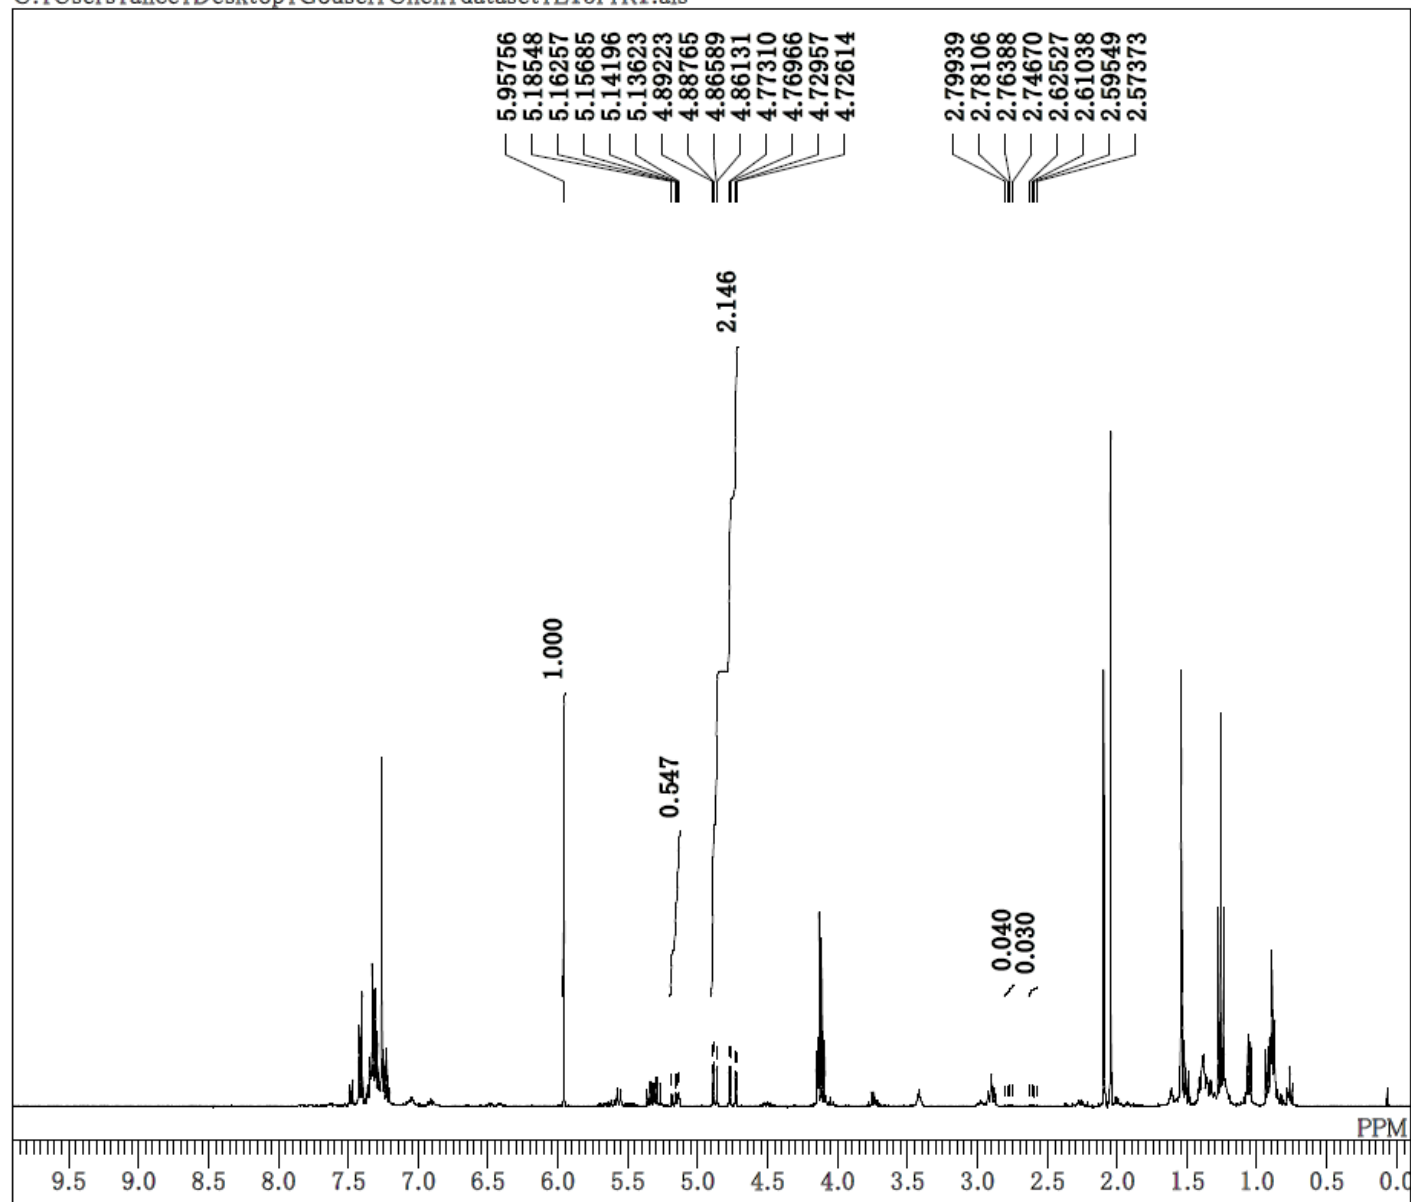

DFILE L15PrR1.als  
COMNT  
DATIM 16-01-2019 15:09:55  
OBNUC 1H  
EXMOD proton.jxp  
OBFRQ 391.78 MHz  
OBSET 8.51 KHz  
OBFIN 3.34 Hz  
POINT 13107  
FREQU 5882.35 Hz  
SCANS 8  
ACQTM 2.2282 sec  
PD 5.0000 sec  
PW1 5.22 usec  
IRNUC 1H  
CTEMP 19.7 c  
SLVNT CDCL3  
EXREF 7.26 ppm  
BF 0.12 Hz  
RGAIN 40

**L15/1Pr, R**

(1<sup>st</sup> trial)

87%, 3.9/1 dr, 38.5/1 b/l

C:\Users\Valice\Desktop\Gousei\Chen\dataset\L15PrR2.als

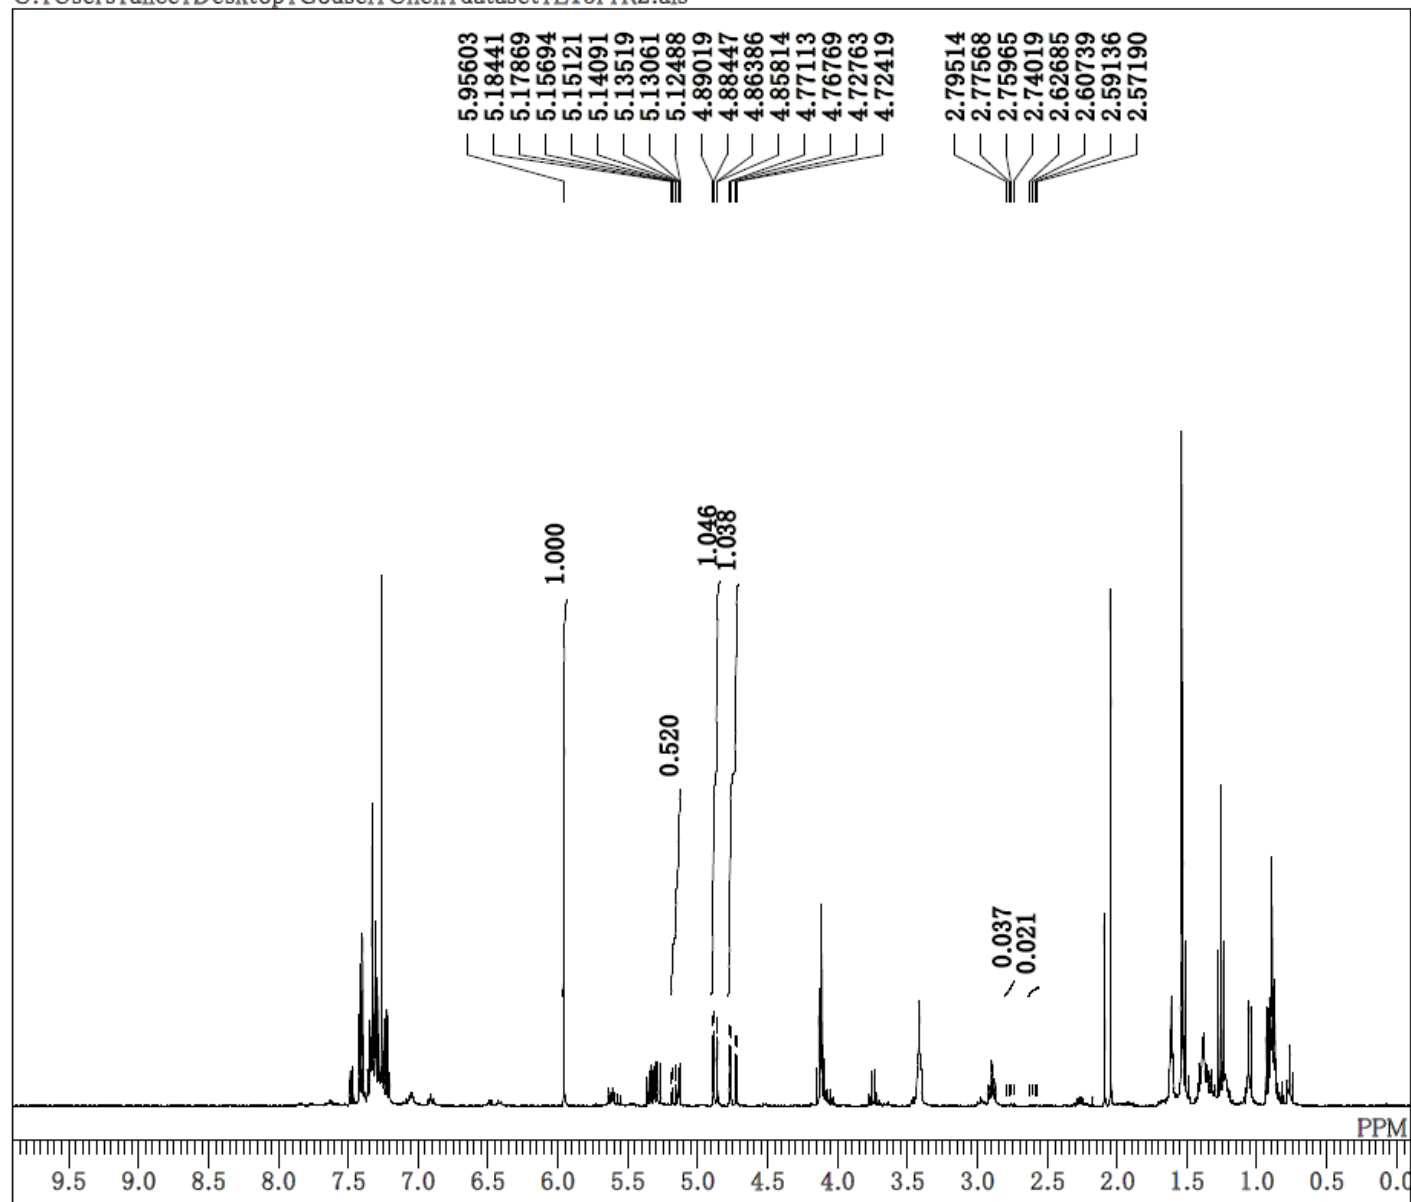

DFILE L15PrR2.als  
 COMNT  
 DATIM 07-09-2020 22:47:60  
 OBNUC 1H  
 EXMOD proton.jxp  
 OBFRQ 391.78 MHz  
 OBSET 8.51 KHz  
 OBFIN 3.34 Hz  
 POINT 13107  
 FREQU 5878.90 Hz  
 SCANS 8  
 ACQTM 2.2295 sec  
 PD 6.0000 sec  
 PW1 5.17 usec  
 IRNUC 1H  
 CTEMP 20.3 c  
 SLVNT CDCL3  
 EXREF 7.26 ppm  
 BF 0.12 Hz  
 RGAIN 38

**L15/1Pr, R**

(2<sup>nd</sup> trial)

84%, 4.0/1 dr, 35.2/1 b/l

C:\Users\Valice\Desktop\Gousei\Chen\dataset\L16EtR1.als

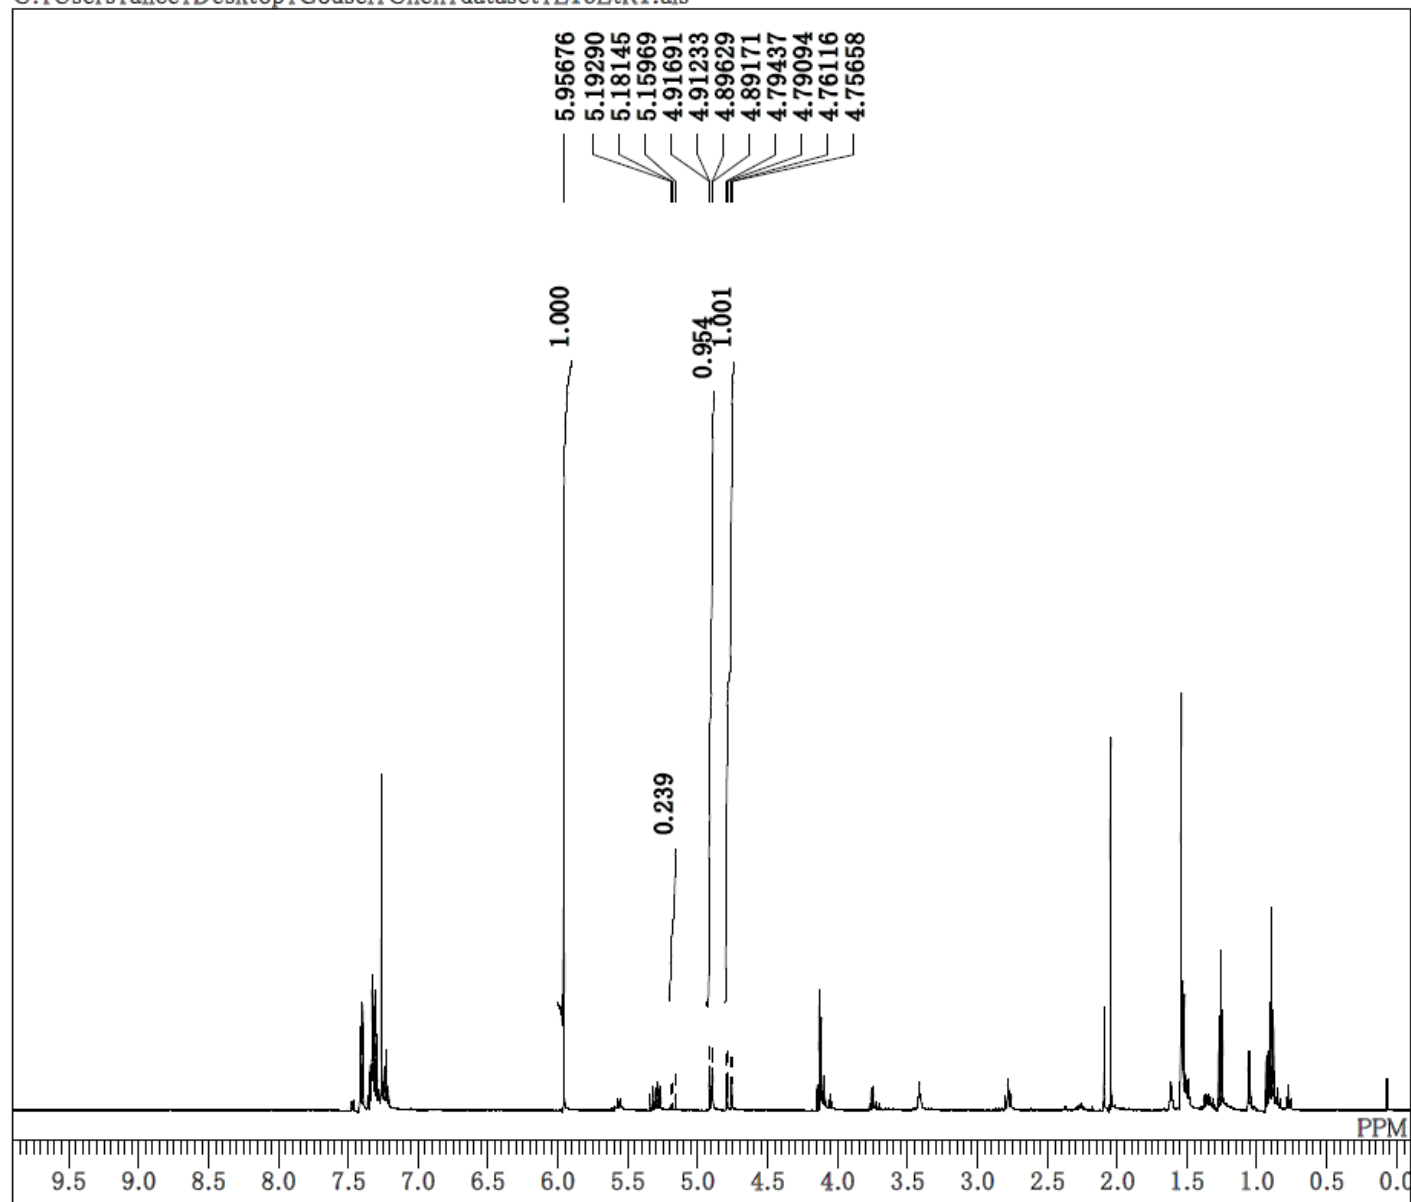

DFILE L16EtR1.als  
 COMNT  
 DATIM 2019-09-06 14:45:35  
 OBNUC 1H  
 EXMOD proton.jxp  
 OBFRQ 500.16 MHz  
 OBSET 2.41 KHz  
 OBFIN 6.01 Hz  
 POINT 13107  
 FREQU 7507.51 Hz  
 SCANS 8  
 ACQTM 1.7459 sec  
 PD 6.0000 sec  
 PW1 5.55 usec  
 IRNUC 1H  
 CTEMP 21.7 c  
 SLVNT CDCL3  
 EXREF 7.26 ppm  
 BF 0.12 Hz  
 RGAIN 40

**L16/1Et, R**

(1<sup>st</sup> trial)

69%, 8.2/1 dr, >50/1 b/l



C:\Users\Valice\Desktop\Gousei\Chen\dataset\L16EtR2.als

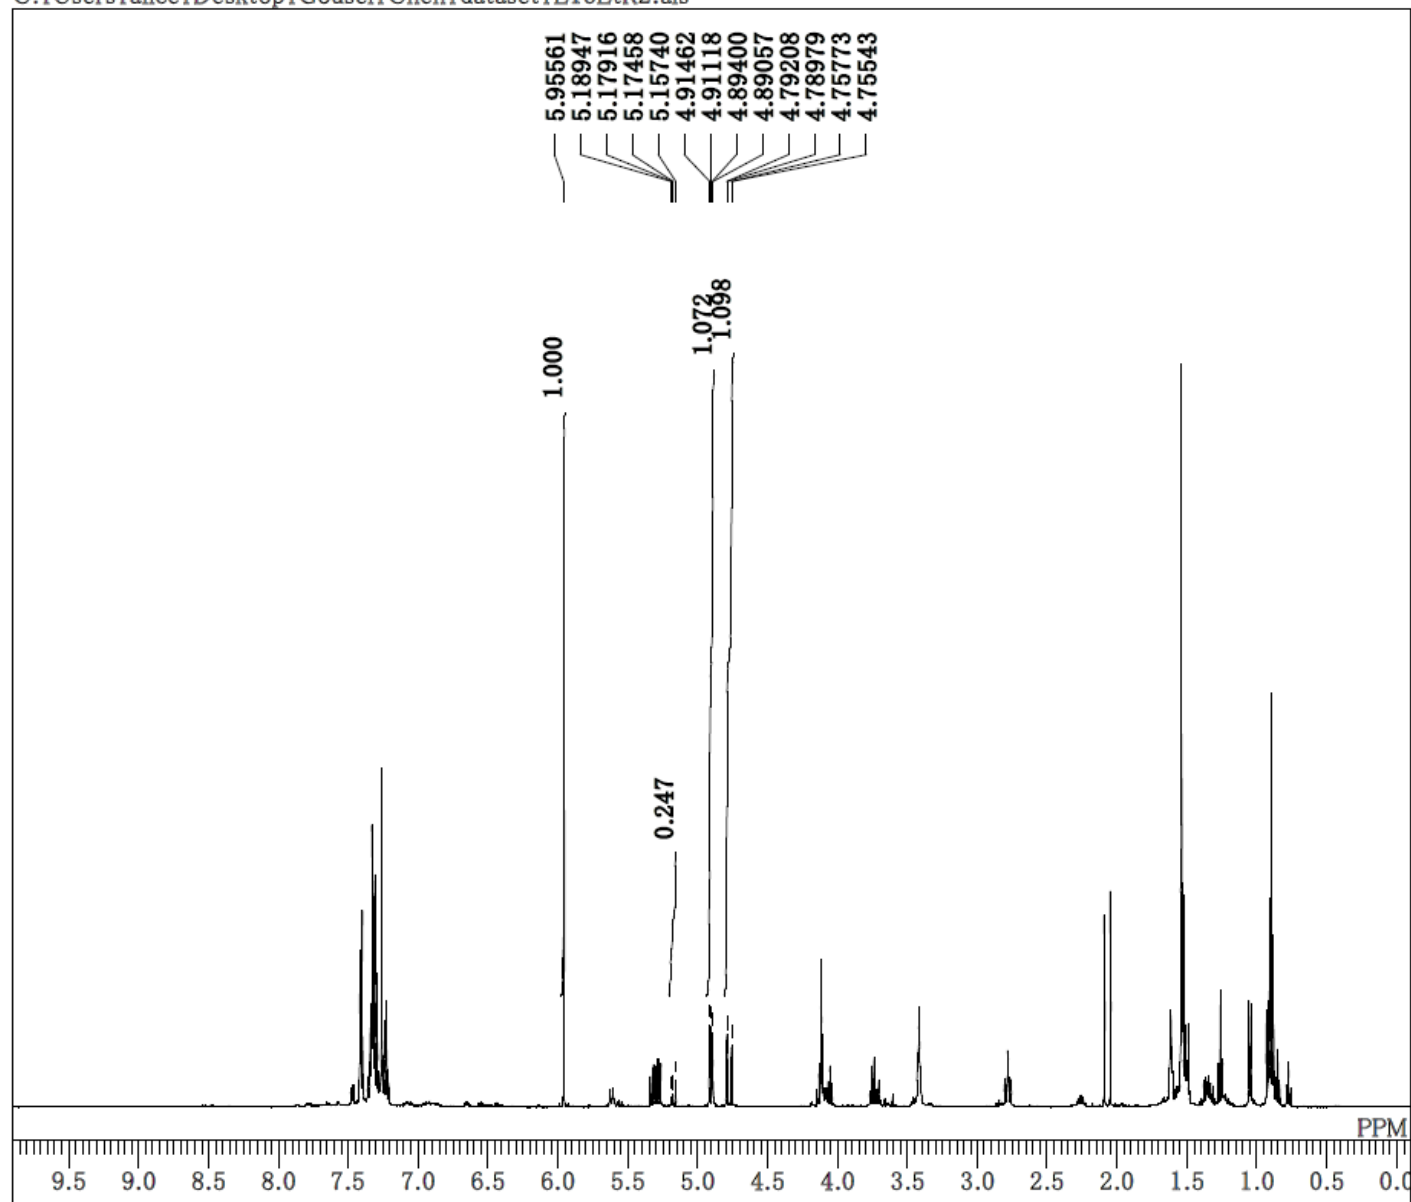

DFILE L16EtR2.als  
COMNT  
DATIM 2020-09-05 16:00:22  
OBNUC 1H  
EXMOD proton.jxp  
OBFRQ 500.16 MHz  
OBSET 2.41 KHz  
OBFIN 6.01 Hz  
POINT 13107  
FREQU 7507.51 Hz  
SCANS 16  
ACQTM 1.7459 sec  
PD 6.0000 sec  
PW1 5.55 usec  
IRNUC 1H  
CTEMP 21.5 c  
SLVNT CDCL3  
EXREF 7.26 ppm  
BF 0.12 Hz  
RGAIN 40

**L16/1Et, R**  
(2<sup>nd</sup> trial)  
76%, 8.8/1 dr, >50/1 b/l

C:\Users\Valice\Desktop\Gousei\Chen\dataset\L16PrR1.als

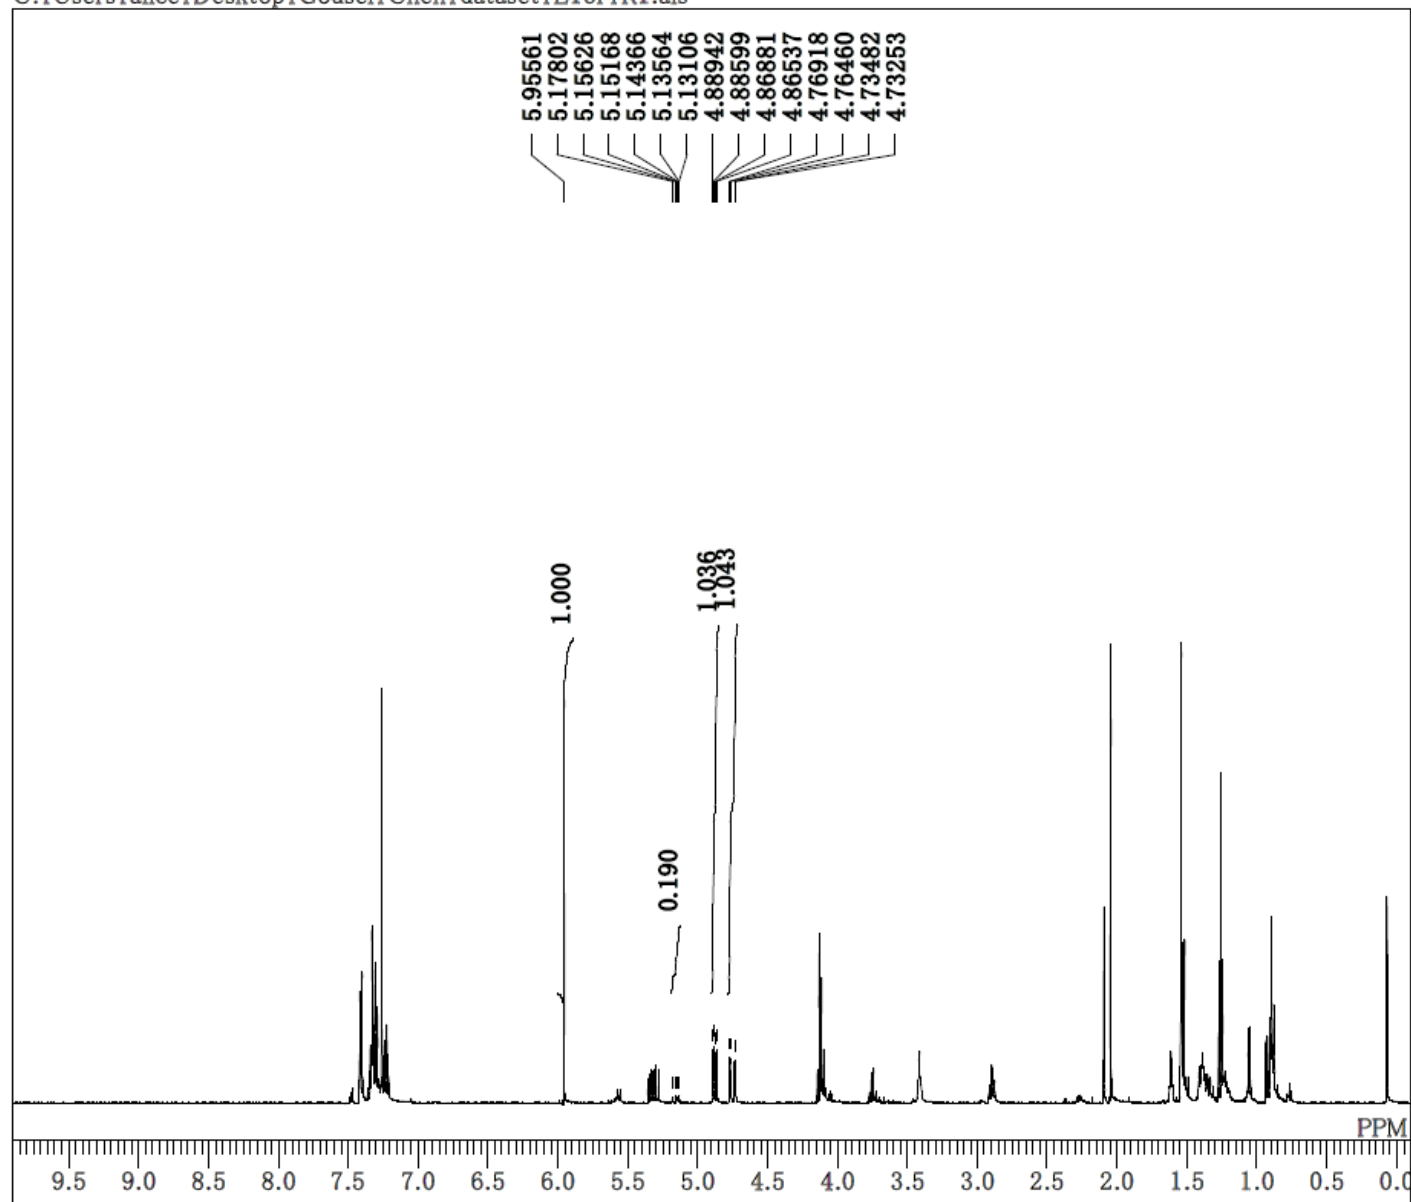

DFILE L16PrR1.als  
COMNT  
DATIM 2019-09-04 10:22:05  
OBNUC 1H  
EXMOD proton.jxp  
OBFRQ 500.16 MHz  
OBSET 2.41 KHz  
OBFIN 6.01 Hz  
POINT 13107  
FREQU 7507.51 Hz  
SCANS 8  
ACQTM 1.7459 sec  
PD 6.0000 sec  
PW1 5.55 usec  
IRNUC 1H  
CTEMP 21.6 c  
SLVNT CDCL3  
EXREF 7.26 ppm  
BF 0.12 Hz  
RGAIN 40

**L16/1Pr, R**

(1<sup>st</sup> trial)

71%, 10.9/1 dr, >50/1 b/l

C:\Users\Valice\Desktop\Gousei\Chen\dataset\L16PrR2.als

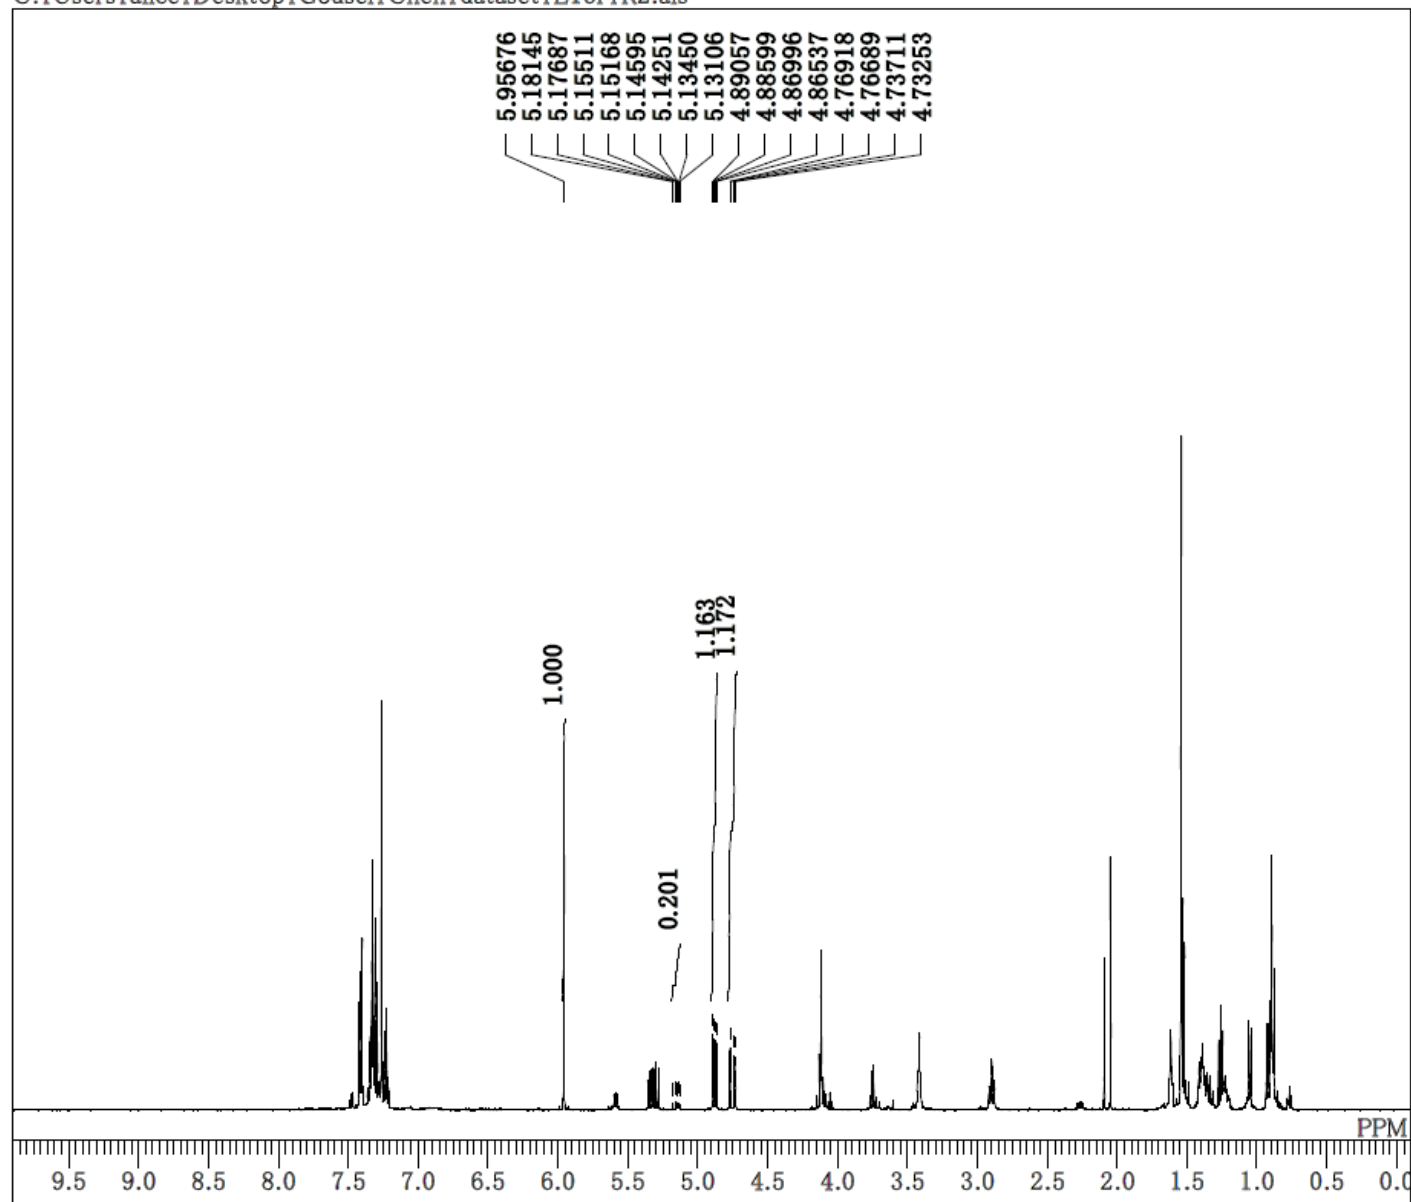

DFILE L16PrR2.als  
 COMNT  
 DATIM 2020-09-05 16:08:04  
 OBNUC 1H  
 EXMOD proton.jxp  
 OBFRQ 500.16 MHz  
 OBSET 2.41 KHz  
 OBFIN 6.01 Hz  
 POINT 13107  
 FREQU 7507.51 Hz  
 SCANS 16  
 ACQTM 1.7459 sec  
 PD 6.0000 sec  
 PW1 5.55 usec  
 IRNUC 1H  
 CTEMP 22.5 c  
 SLVNT CDCL3  
 EXREF 7.26 ppm  
 BF 0.12 Hz  
 RGAIN 40

**L16/1Pr, R**

(2<sup>nd</sup> trial)

80%, 11.6/1 dr, >50/1 b/l

C:\Users\Valice\Desktop\Gousei\Chen\dataset\L1EtS1.als

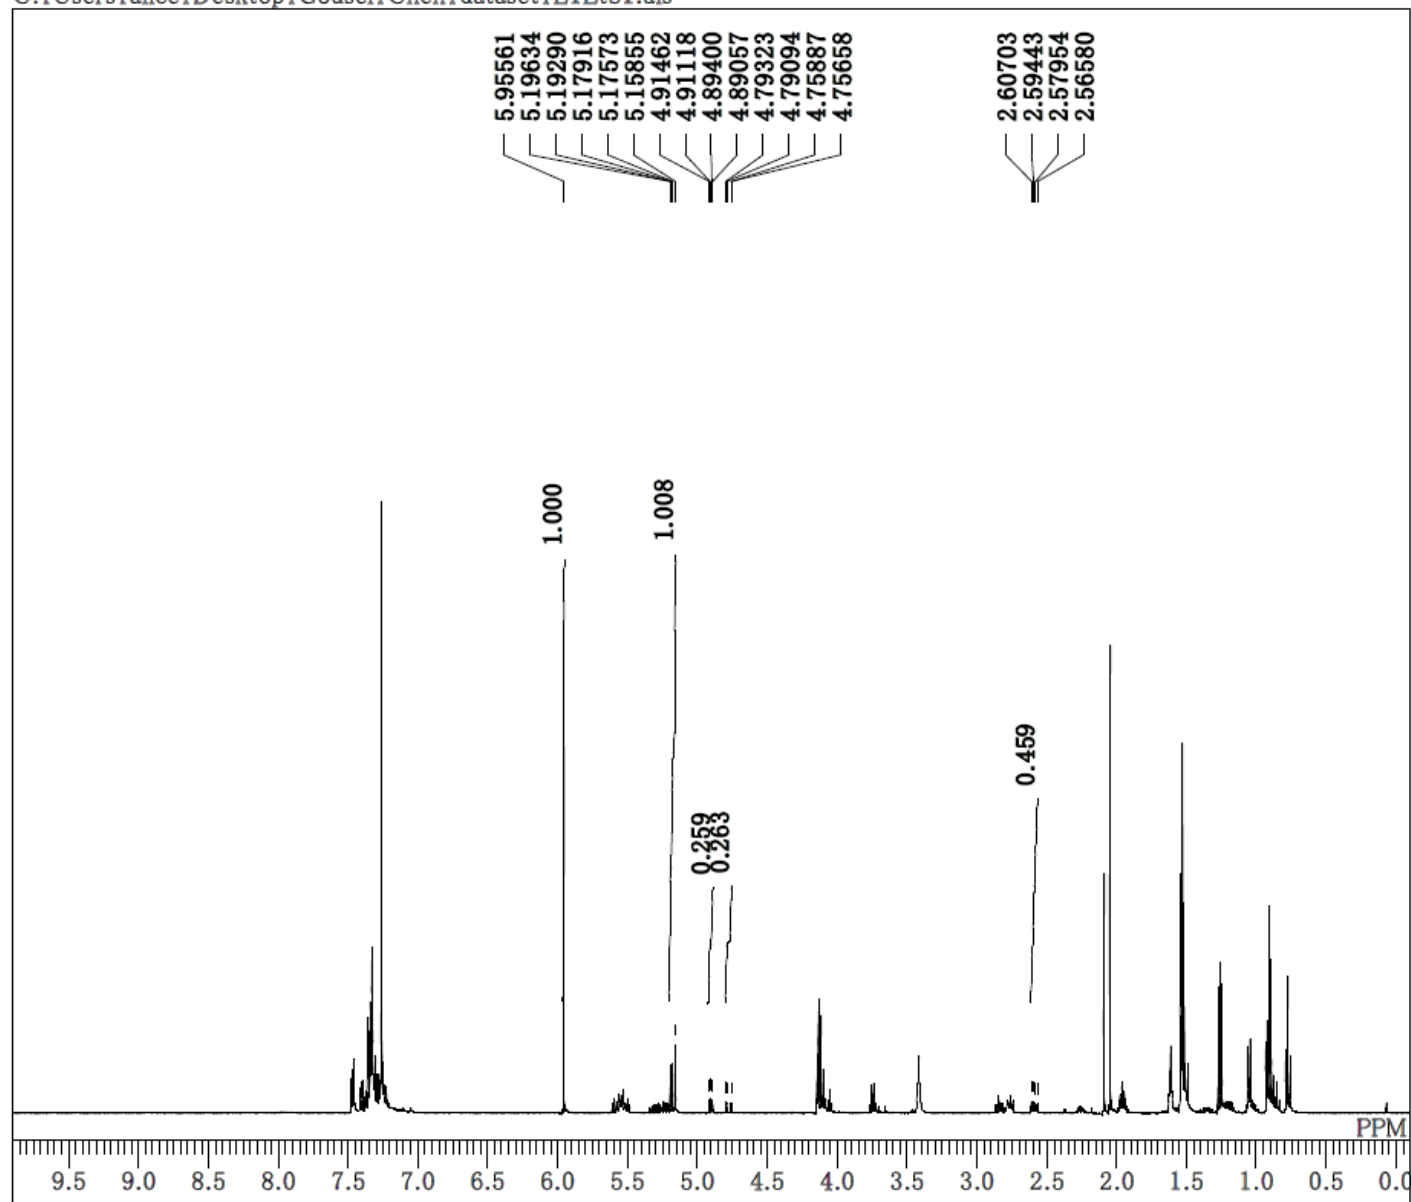

DFILE L1EtS1.als  
 COMNT  
 DATIM 2018-11-23 12:59:23  
 OBNUC 1H  
 EXMOD proton.jxp  
 OBFRQ 500.16 MHz  
 OBSET 2.41 KHz  
 OBFIN 6.01 Hz  
 POINT 13107  
 FREQU 7507.51 Hz  
 SCANS 8  
 ACQTM 1.7459 sec  
 PD 5.0000 sec  
 PW1 5.55 usec  
 IRNUC 1H  
 CTEMP 21.5 c  
 SLVNT CDCL3  
 EXREF 7.26 ppm  
 BF 0.12 Hz  
 RGAIN 32

**L1/1Et, S**

(1<sup>st</sup> trial)

77%, 1.9/1 dr, 1.7/1 b/l

C:\Users\Valice\Desktop\Gousei\Chen\dataset\L1EtS2.als

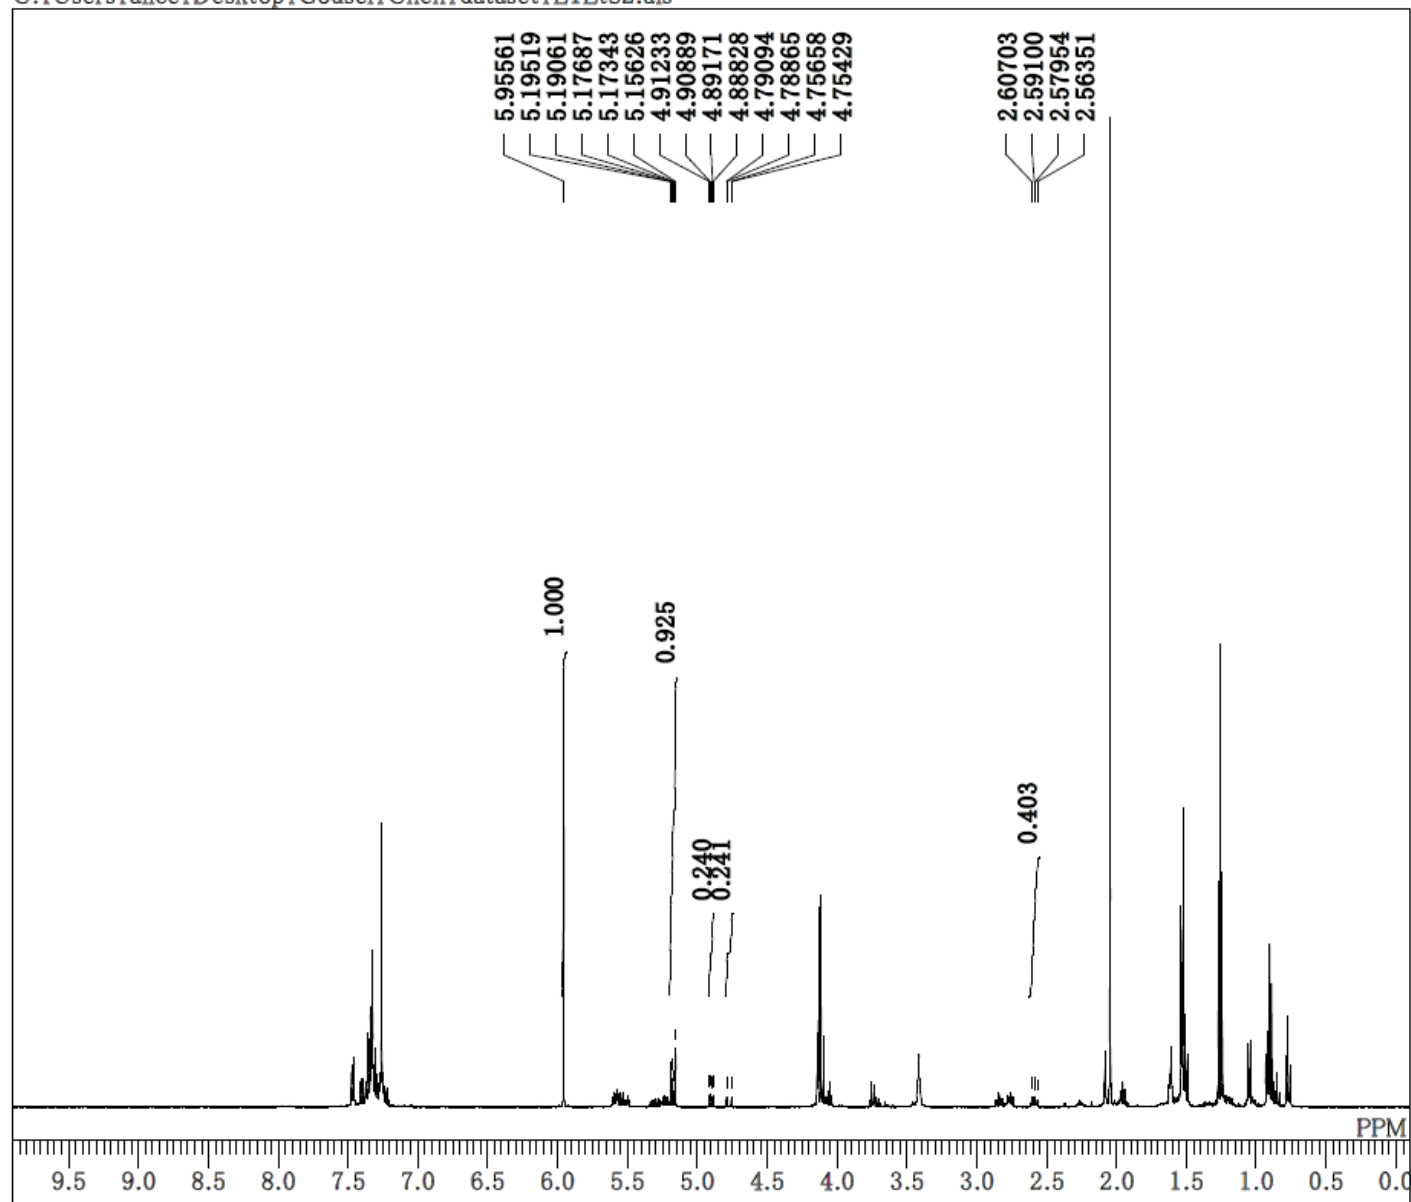

DFILE L1EtS2.als  
 COMNT  
 DATIM 2020-08-26 15:30:27  
 OBNUC 1H  
 EXMOD proton.jxp  
 OBFRQ 500.16 MHz  
 OBSET 2.41 KHz  
 OBFIN 6.01 Hz  
 POINT 13107  
 FREQU 7507.51 Hz  
 SCANS 8  
 ACQTM 1.7459 sec  
 PD 6.0000 sec  
 PW1 5.55 usec  
 IRNUC 1H  
 CTEMP 21.6 c  
 SLVNT CDCL3  
 EXREF 7.26 ppm  
 BF 0.12 Hz  
 RGAIN 42

**L1/1Et, S**

(2<sup>nd</sup> trial)

70%, 1.9/1 dr, 1.7/1 b/l

C:\Users\Valice\Desktop\Gousei\Chen\dataset\L1PrS1.als

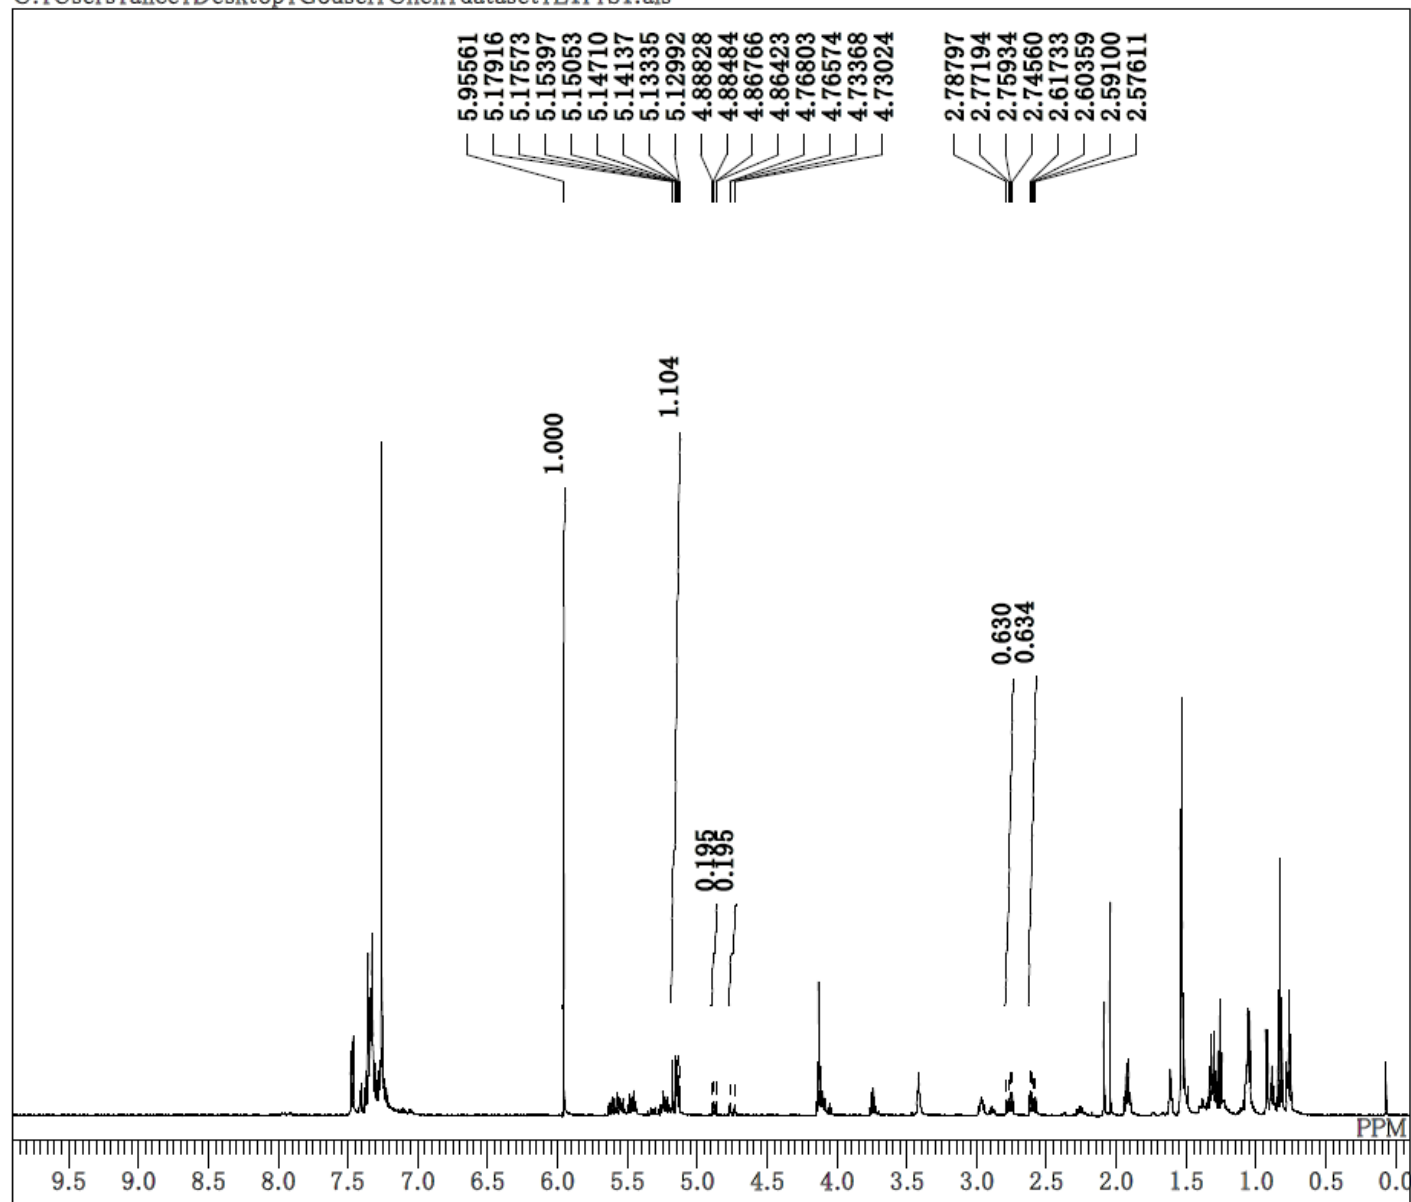

DFILE L1PrS1.als  
 COMNT  
 DATIM 2018-11-21 15:26:37  
 OBNUC 1H  
 EXMOD proton.jxp  
 OBFRQ 500.16 MHz  
 OBSET 2.41 KHz  
 OBFIN 6.01 Hz  
 POINT 13107  
 FREQU 7507.51 Hz  
 SCANS 8  
 ACQTM 1.7459 sec  
 PD 5.0000 sec  
 PW1 5.55 usec  
 IRNUC 1H  
 CTEMP 22.0 c  
 SLVNT CDCL3  
 EXREF 7.26 ppm  
 BF 0.12 Hz  
 RGAIN 32

**L1/1Pr, S**

(1<sup>st</sup> trial)

87%, 2.8/1 dr, 1.2/1 b/l

C:\Users\Valice\Desktop\Gousei\Chen\dataset\L1PrS2.als

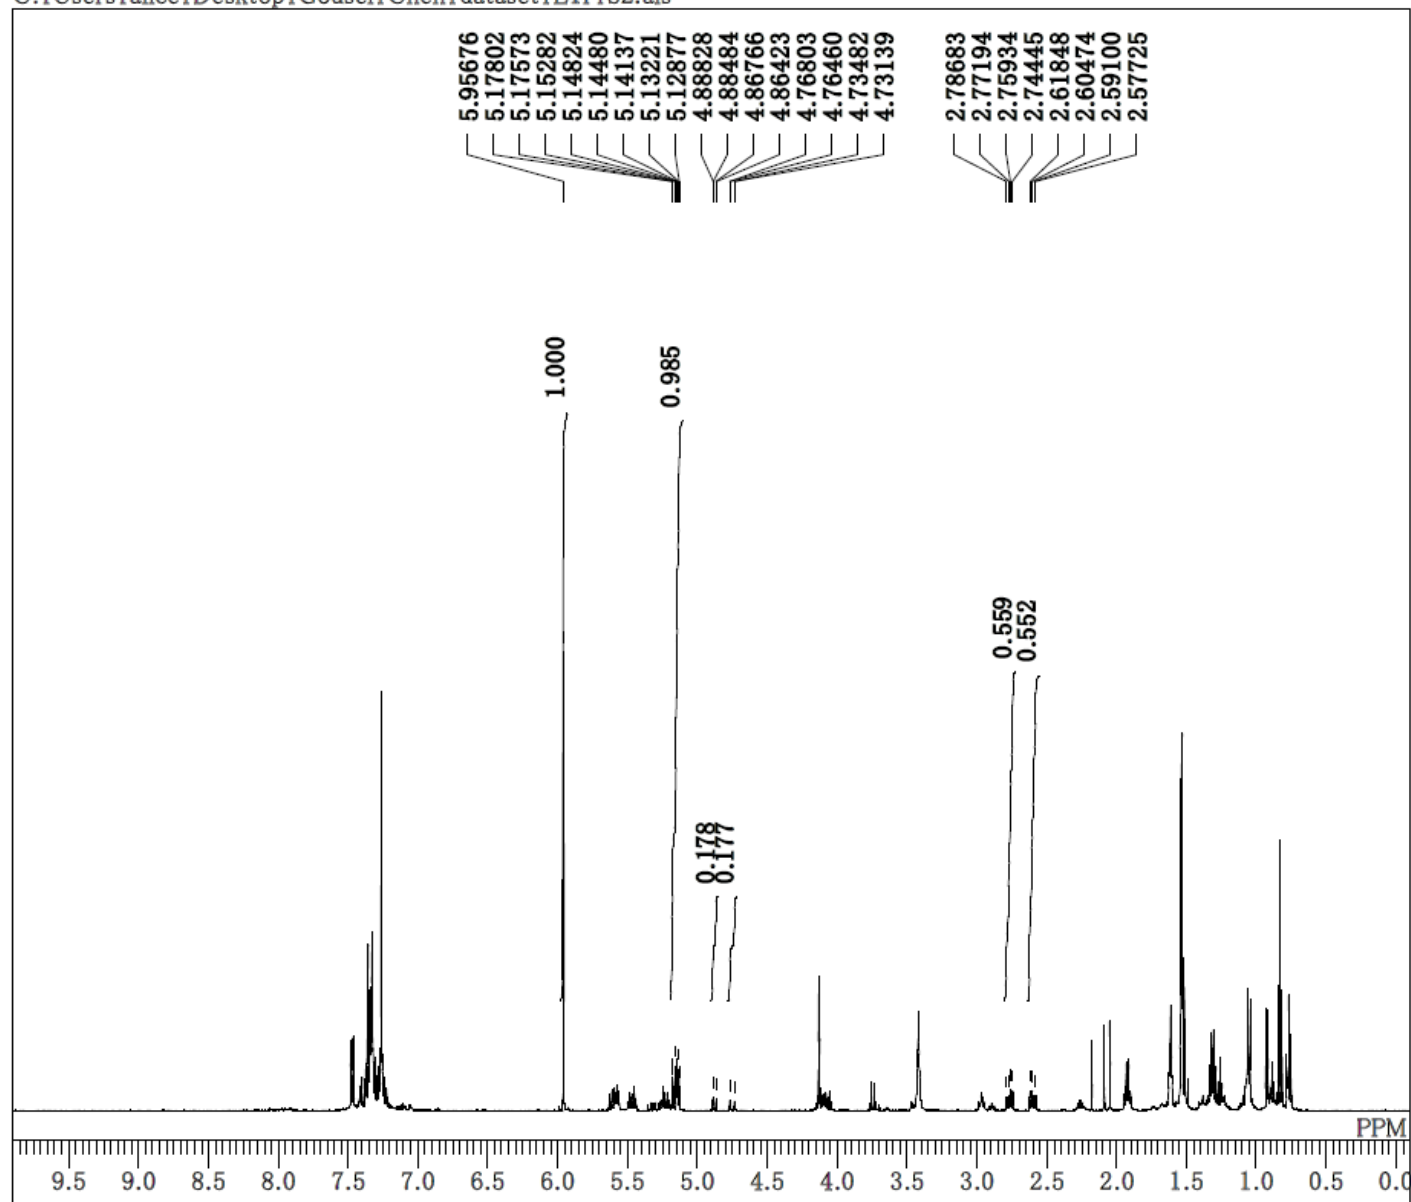

DFILE L1PrS2.als  
 COMNT  
 DATIM 2020-08-26 21:51:49  
 OBNUC 1H  
 EXMOD proton.jxp  
 OBFRQ 500.16 MHz  
 OBSET 2.41 KHz  
 OBFIN 6.01 Hz  
 POINT 13107  
 FREQU 7507.51 Hz  
 SCANS 8  
 ACQTM 1.7459 sec  
 PD 6.0000 sec  
 PW1 5.55 usec  
 IRNUC 1H  
 CTEMP 22.0 c  
 SLVNT CDCL3  
 EXREF 7.26 ppm  
 BF 0.12 Hz  
 RGAIN 42

**L1/1Pr, S**

(2<sup>nd</sup> trial)

77%, 2.8/1 dr, 1.2/1 b/l

C:\Users\Valice\Desktop\Gousei\Chen\dataset\L2EtS1.als

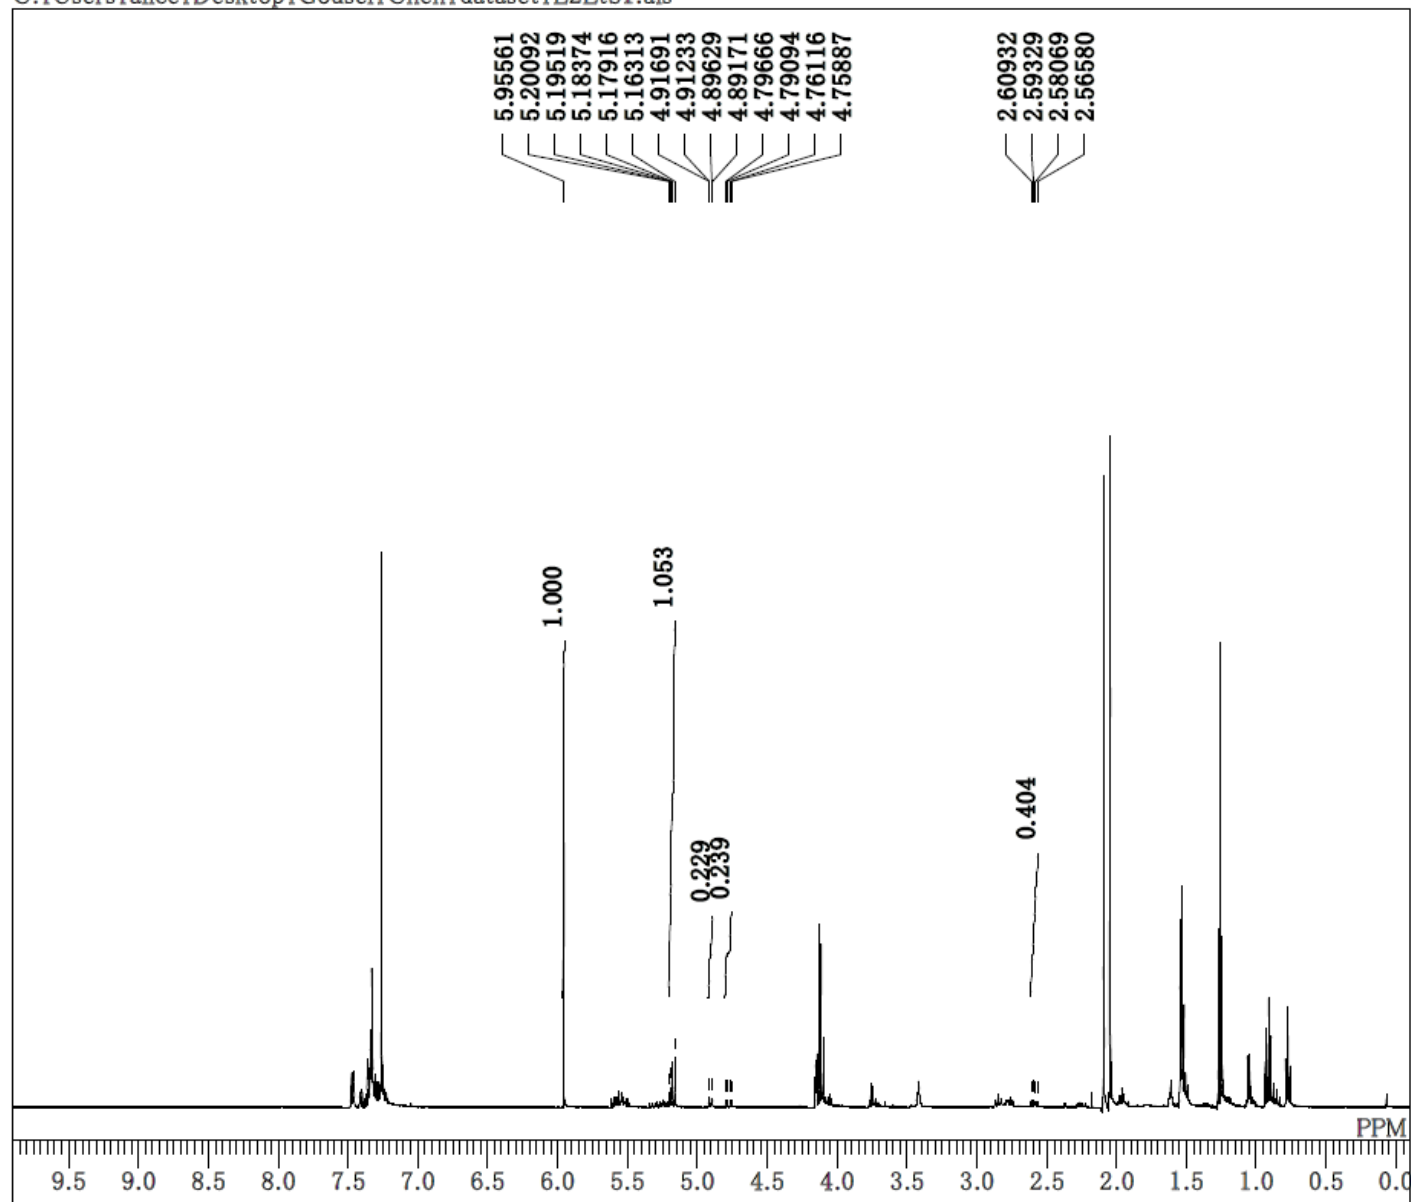

DFILE L2EtS1.als  
 COMNT  
 DATIM 2018-11-13 16:15:25  
 OBNUC 1H  
 EXMOD proton.jxp  
 OBFRQ 500.16 MHz  
 OBSET 2.41 KHz  
 OBFIN 6.01 Hz  
 POINT 13107  
 FREQU 7507.51 Hz  
 SCANS 8  
 ACQTM 1.7459 sec  
 PD 5.0000 sec  
 PW1 5.55 usec  
 IRNUC 1H  
 CTEMP 22.0 c  
 SLVNT CDCL3  
 EXREF 7.26 ppm  
 BF 0.12 Hz  
 RGAIN 32

**L2/1Et, S**

(1<sup>st</sup> trial)

73%, 2.3/1 dr, 1.9/1 b/l



C:\Users\Valice\Desktop\Gousei\Chen\dataset\L2EtS2.als

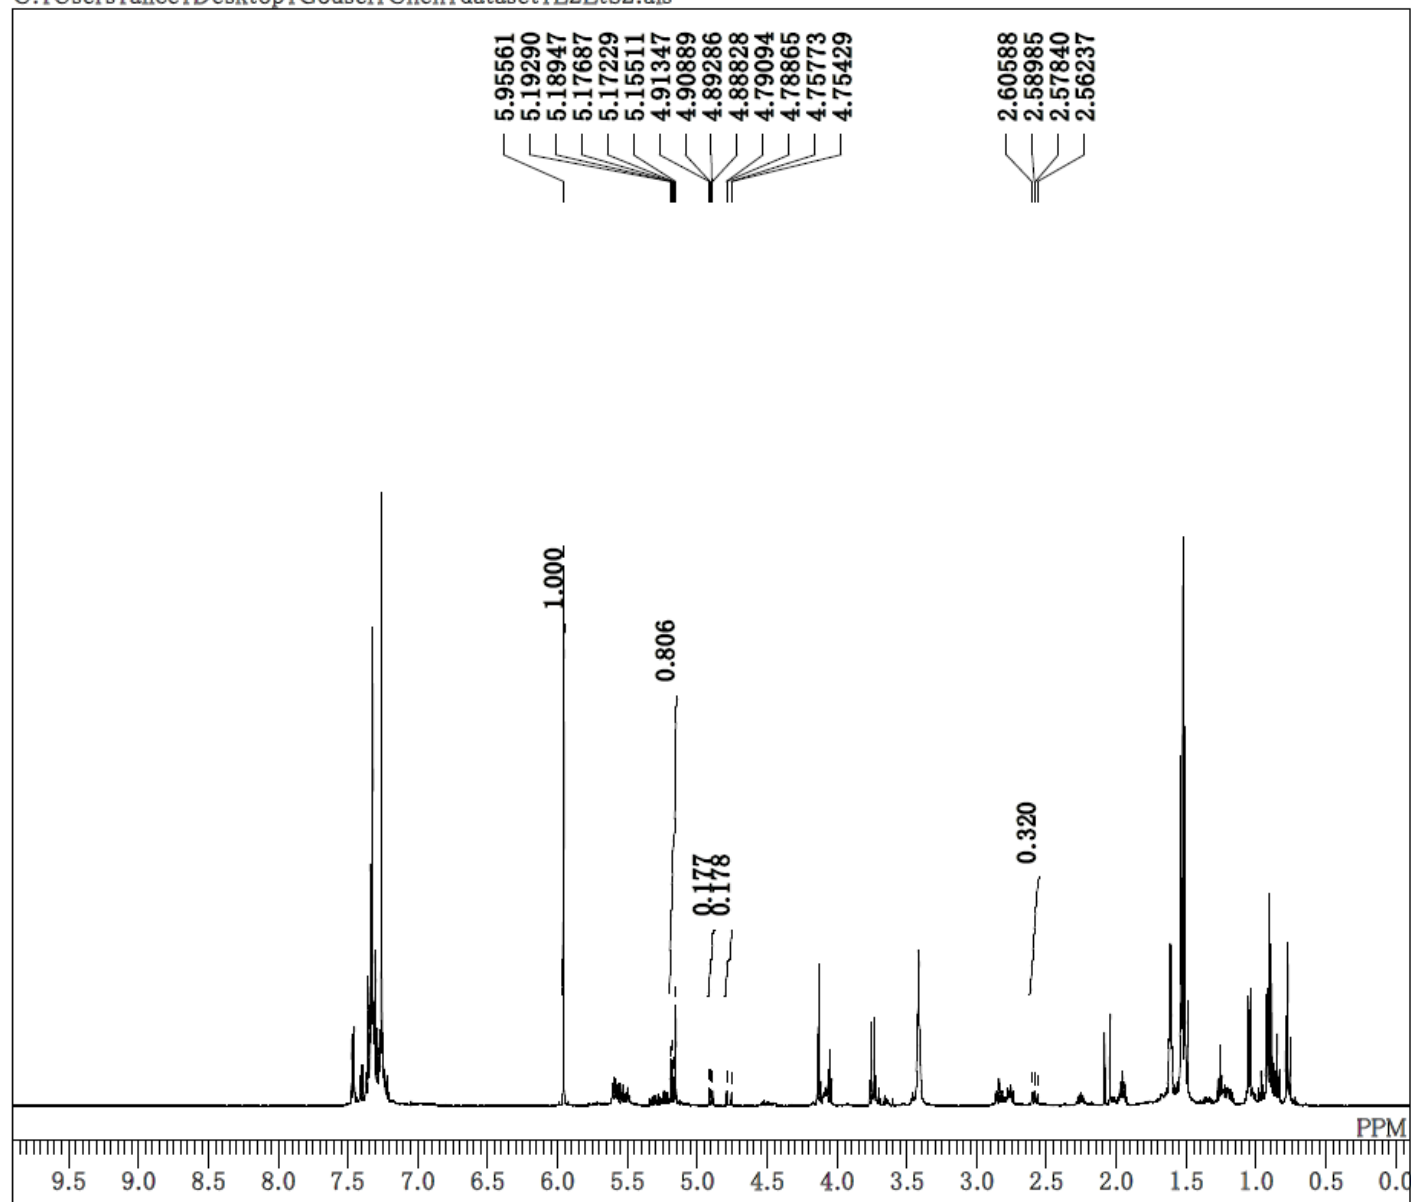

DFILE L2EtS2.als  
COMNT  
DATIM 2020-08-28 00:28:25  
OBNUC 1H  
EXMOD proton.jxp  
OBFRQ 500.16 MHz  
OBSET 2.41 KHz  
OBFIN 6.01 Hz  
POINT 13107  
FREQU 7507.51 Hz  
SCANS 8  
ACQTM 1.7459 sec  
PD 6.0000 sec  
PW1 5.55 usec  
IRNUC 1H  
CTEMP 21.9 c  
SLVNT CDCL3  
EXREF 7.26 ppm  
BF 0.12 Hz  
RGAIN 42

**L2/1Et, S**

(2<sup>nd</sup> trial)

57%, 2.3/1 dr, 1.8/1 b/l

C:\Users\Valice\Desktop\Gousei\Chen\aaaaaaaaaaaa\L2PrS1.als

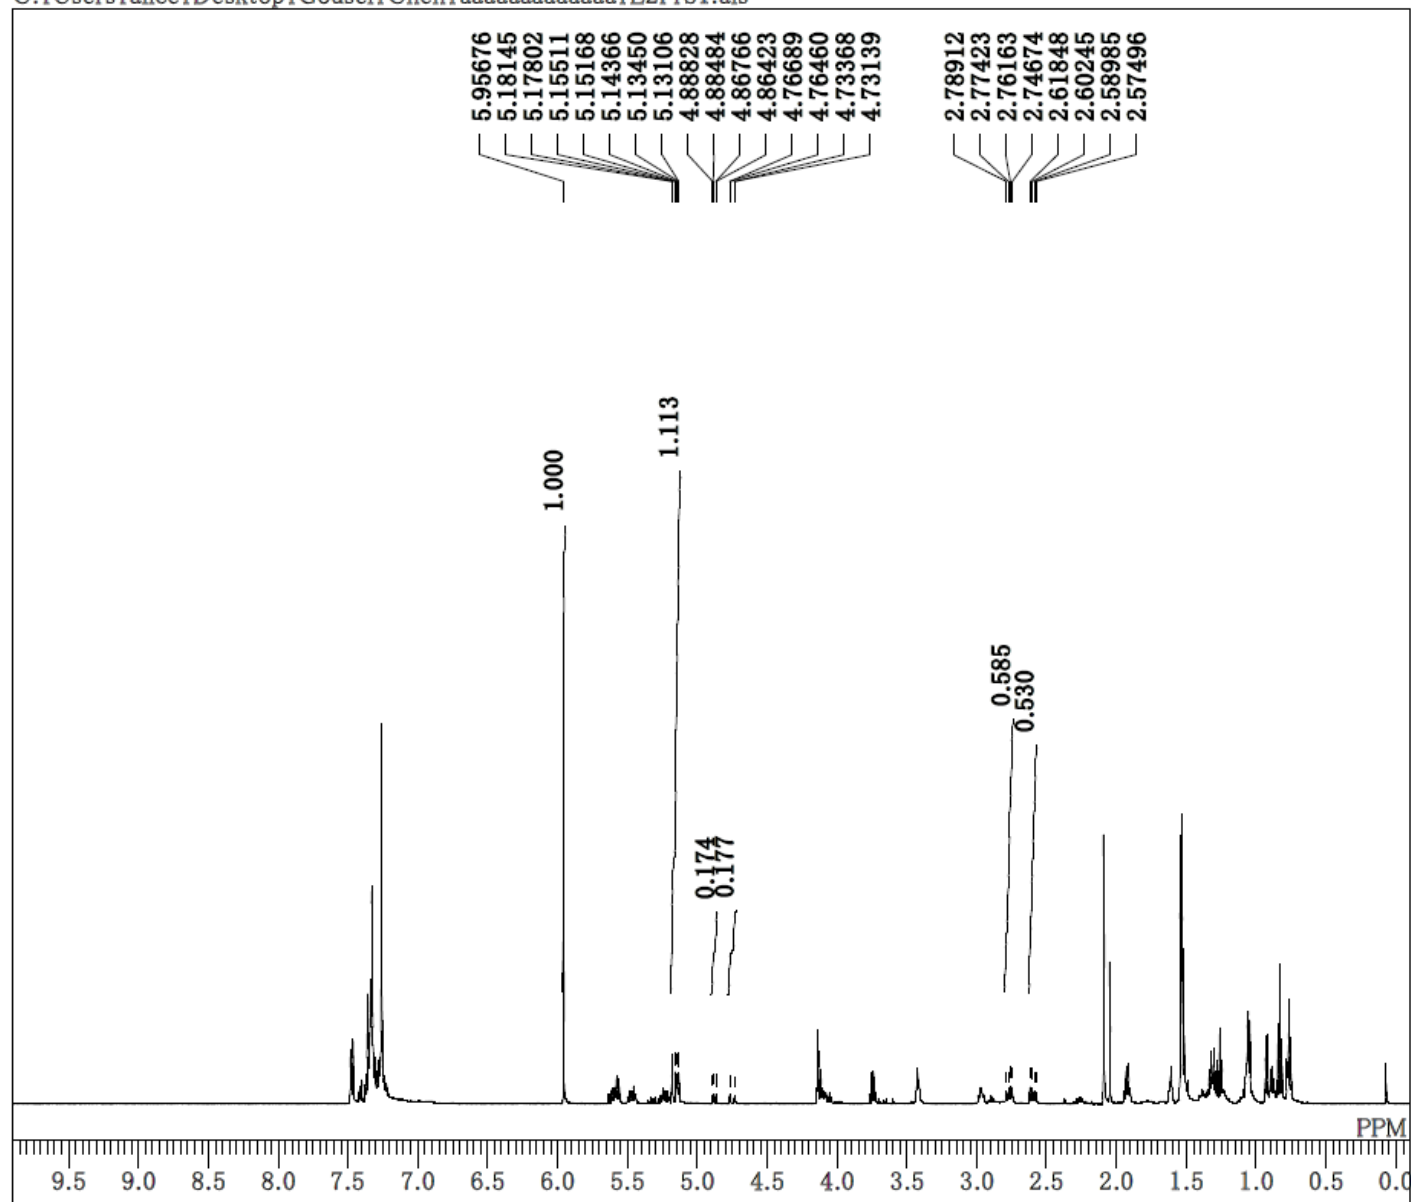

DFILE L2PrS1.als  
COMNT  
DATIM 2018-11-11 22:53:41  
OBNUC 1H  
EXMOD proton.jxp  
OBFRQ 500.16 MHz  
OBSET 2.41 KHz  
OBFIN 6.01 Hz  
POINT 13107  
FREQU 7507.51 Hz  
SCANS 8  
ACQTM 1.7459 sec  
PD 5.0000 sec  
PW1 5.55 usec  
IRNUC 1H  
CTEMP 21.6 c  
SLVNT CDCL3  
EXREF 7.26 ppm  
BF 0.12 Hz  
RGAIN 32

**L2/1Pr, S**

(1<sup>st</sup> trial)

81%, 3.2/1 dr, 1.3/1 b/l

C:\Users\Valice\Desktop\Gousei\Chen\dataset\L2PrS2.als

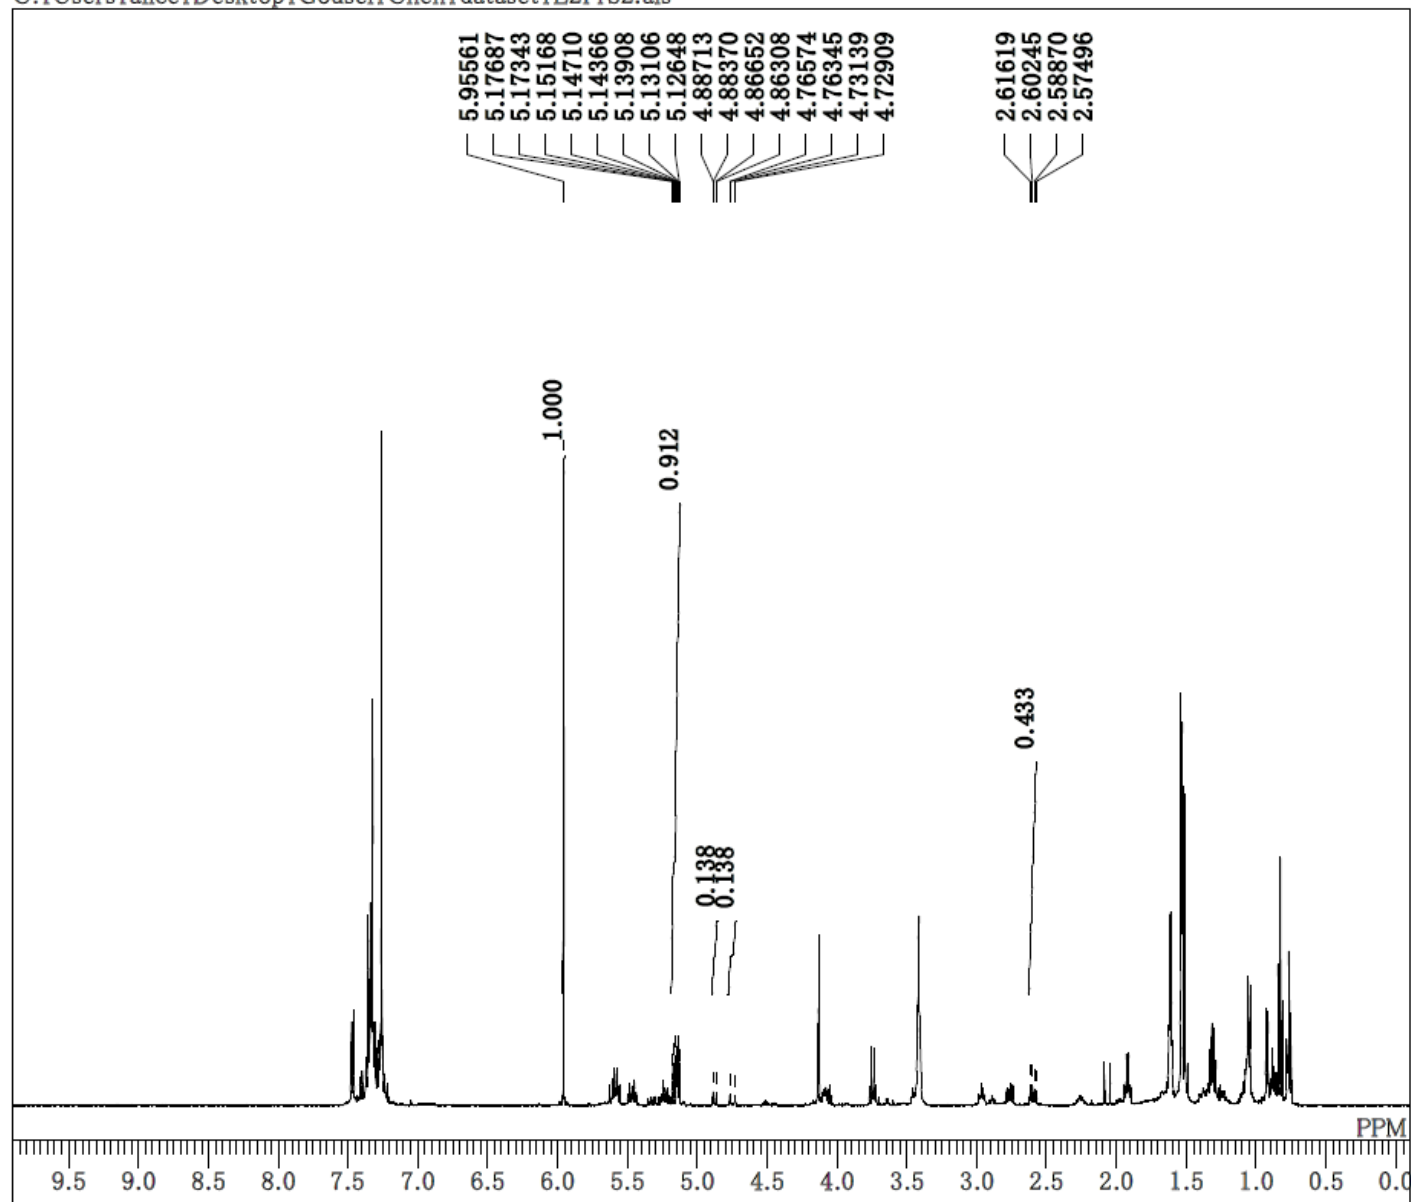

DFILE L2PrS2.als  
 COMNT  
 DATIM 2020-08-28 00:35:42  
 OBNUC 1H  
 EXMOD proton.jxp  
 OBFRQ 500.16 MHz  
 OBSET 2.41 KHz  
 OBFIN 6.01 Hz  
 POINT 13107  
 FREQU 7507.51 Hz  
 SCANS 8  
 ACQTM 1.7459 sec  
 PD 6.0000 sec  
 PW1 5.55 usec  
 IRNUC 1H  
 CTEMP 22.0 c  
 SLVNT CDCL3  
 EXREF 7.26 ppm  
 BF 0.12 Hz  
 RGAIN 42

**L2/1Pr, S**

(2<sup>nd</sup> trial)

65%, 3.3/1 dr, 1.4/1 b/l

C:\Users\Valice\Desktop\Gousei\Chen\dataset\L3EtS1.als

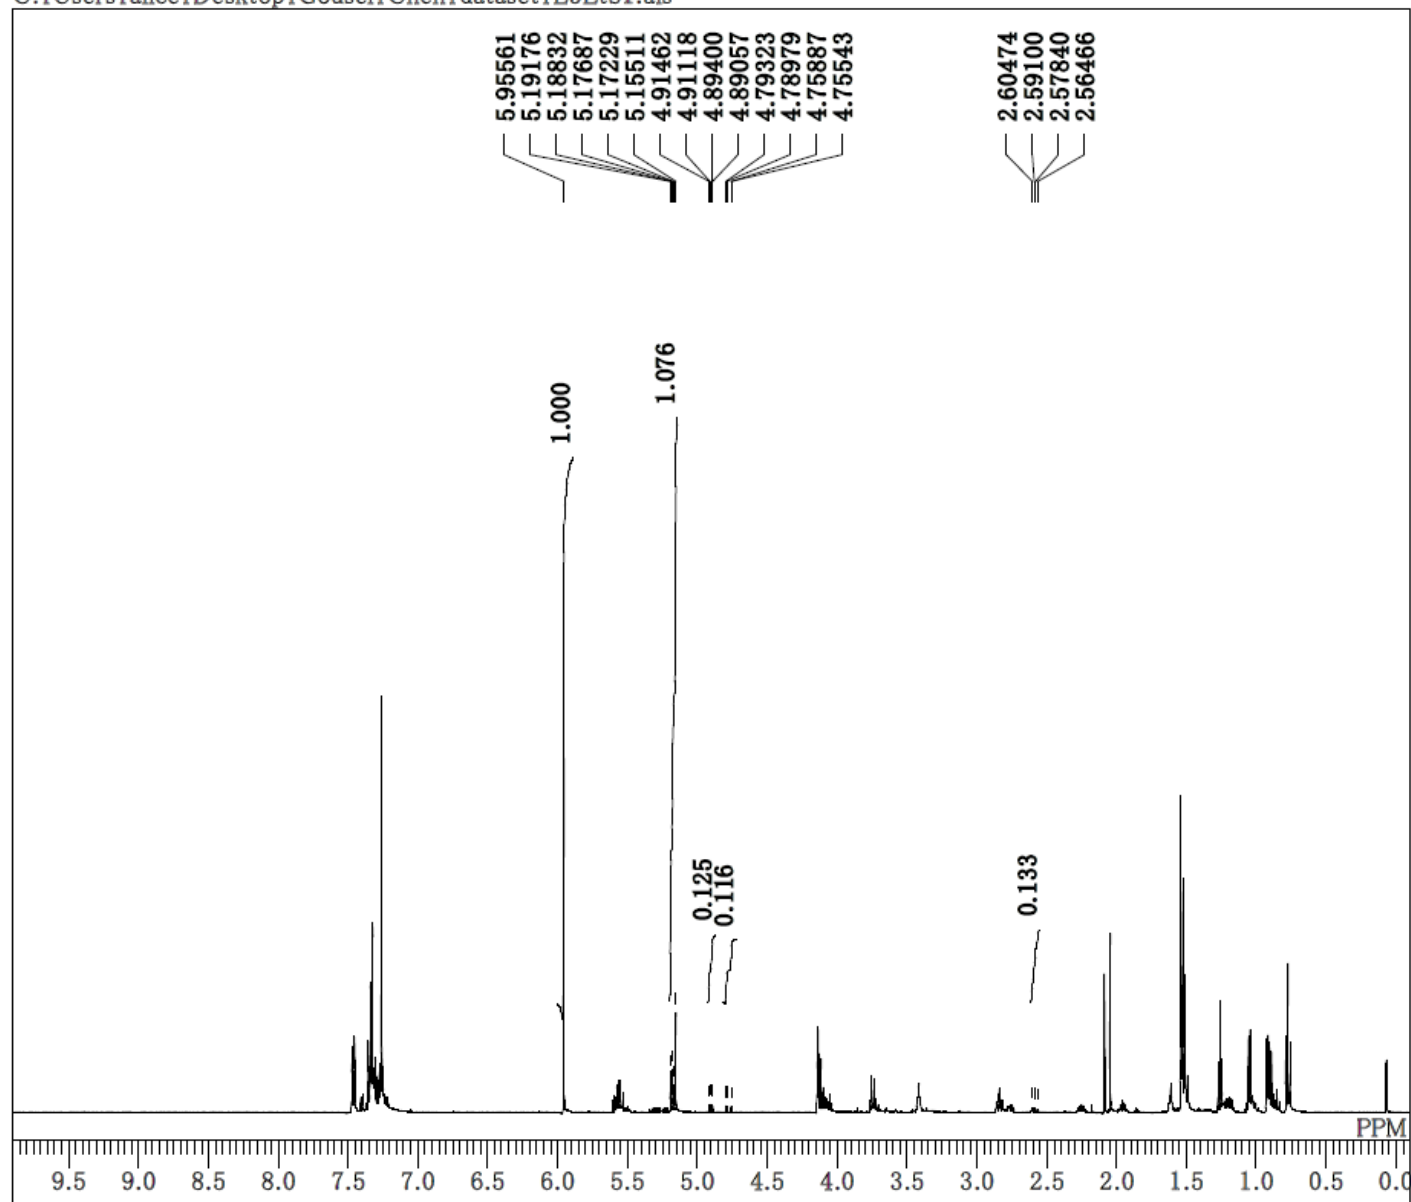

DFILE L3EtS1.als  
 COMNT  
 DATIM 2019-09-09 11:23:26  
 OBNUC 1H  
 EXMOD proton.jxp  
 OBFRQ 500.16 MHz  
 OBSET 2.41 KHz  
 OBFIN 6.01 Hz  
 POINT 13107  
 FREQU 7507.51 Hz  
 SCANS 8  
 ACQTM 1.7459 sec  
 PD 6.0000 sec  
 PW1 5.55 usec  
 IRNUC 1H  
 CTEMP 22.3 c  
 SLVNT CDCL3  
 EXREF 7.26 ppm  
 BF 0.12 Hz  
 RGAIN 40

**L3/1Et, S**

(1<sup>st</sup> trial)

50%, 4.5/1 dr, 5.0/1 b/l

C:\Users\Valice\Desktop\Gousei\Chen\dataset\L3EtS2.als

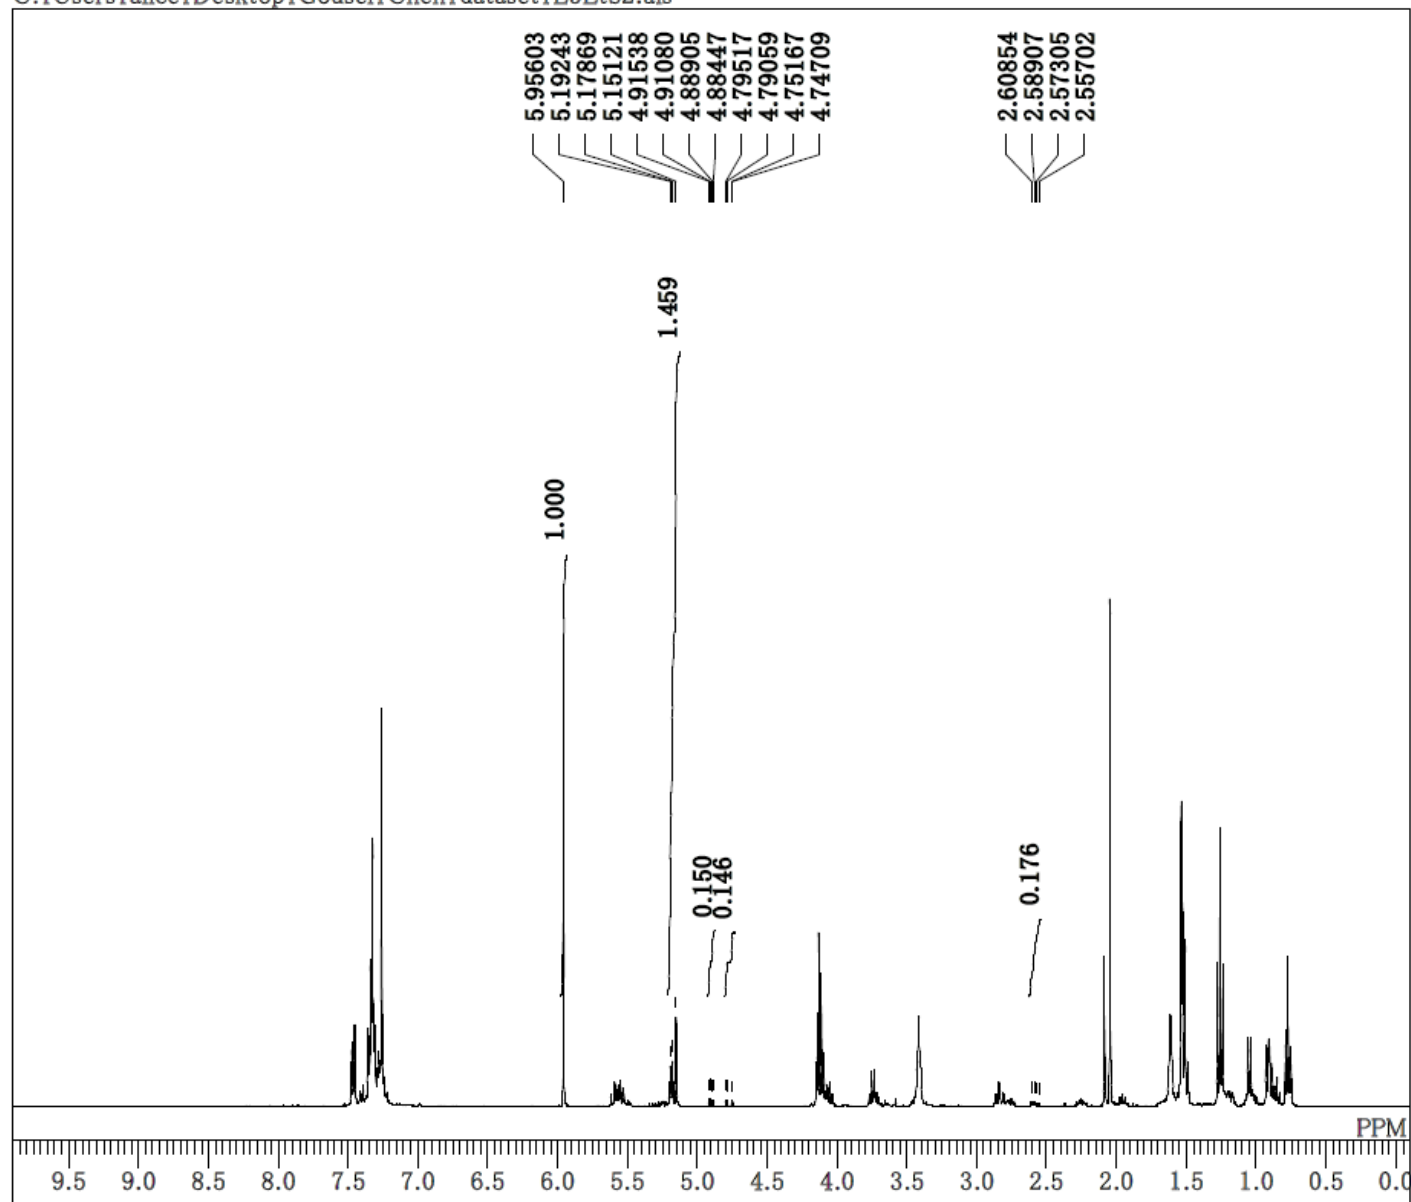

DFILE L3EtS2.als  
COMNT  
DATIM 22-08-2020 11:24:59  
OBNUC 1H  
EXMOD proton.jxp  
OBFRQ 391.78 MHz  
OBSET 8.51 KHz  
OBFIN 3.34 Hz  
POINT 13107  
FREQU 5878.90 Hz  
SCANS 8  
ACQTM 2.2295 sec  
PD 6.0000 sec  
PW1 5.17 usec  
IRNUC 1H  
CTEMP 21.0 c  
SLVNT CDCL3  
EXREF 7.26 ppm  
BF 0.62 Hz  
RGAIN 40

**L3/1Et, S**

(2<sup>nd</sup> trial)

66%, 4.9/1 dr, 5.0/1 b/l

C:\Users\Valice\Desktop\Gousei\Chen\dataset\L3PrS1.als

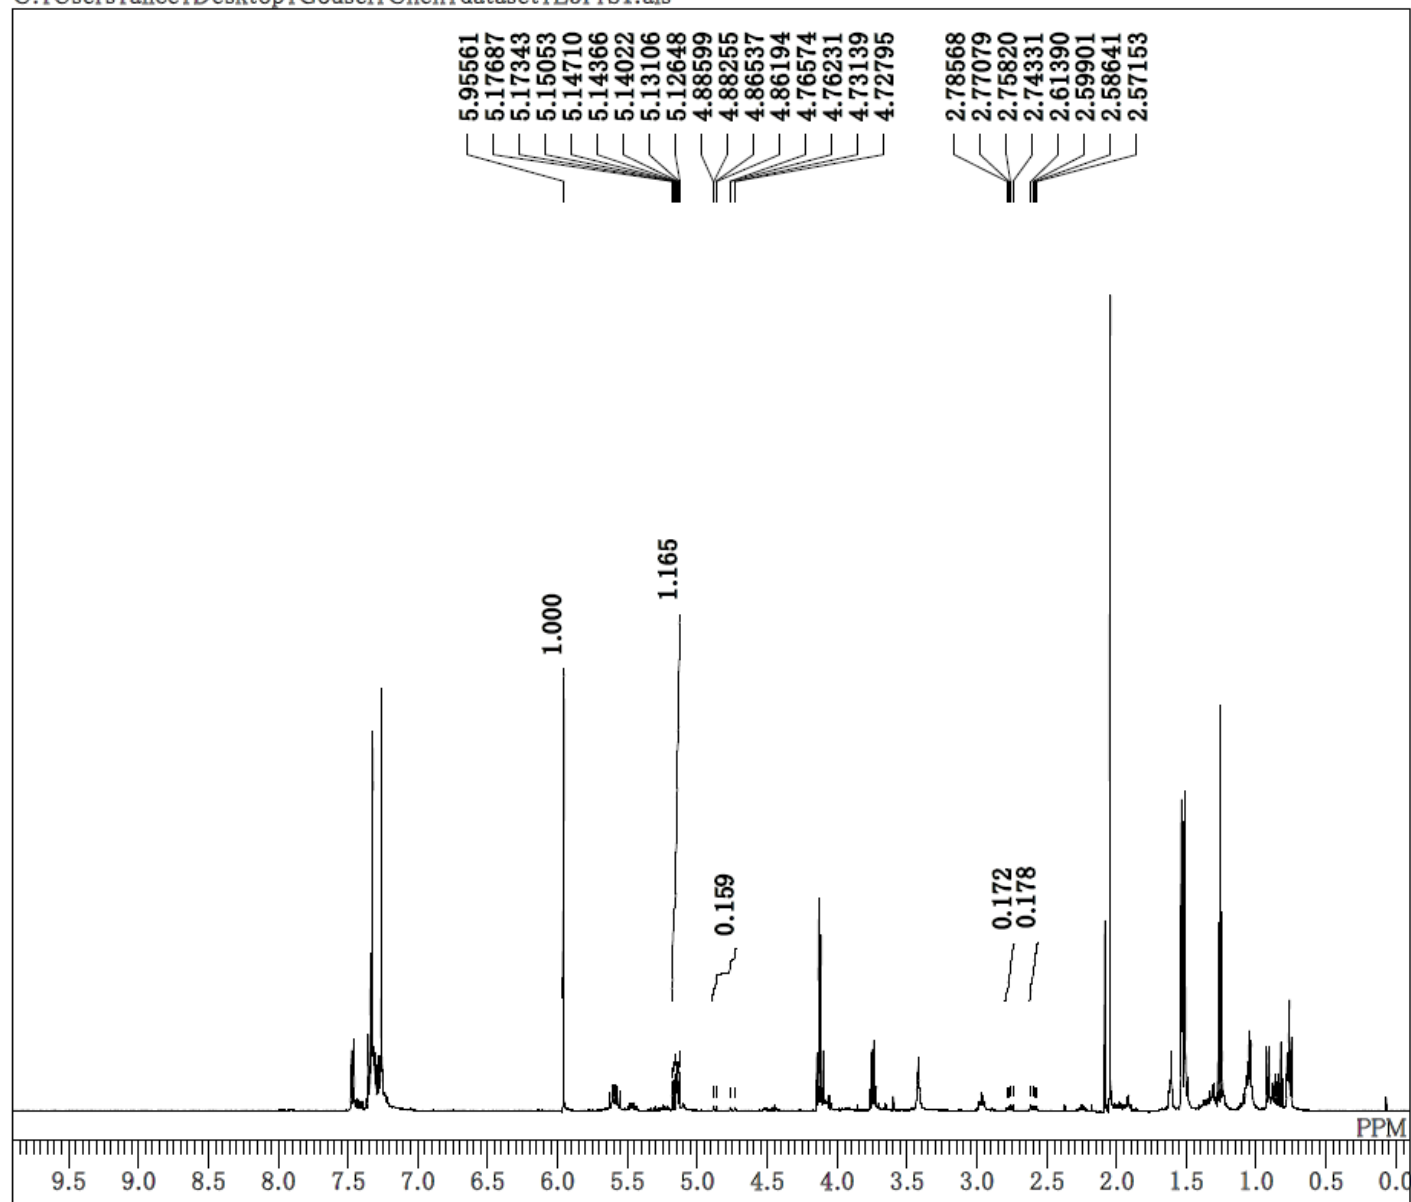

DFILE L3PrS1.als  
 COMNT  
 DATIM 2018-07-14 17:54:49  
 OBNUC 1H  
 EXMOD proton.jxp  
 OBFRQ 500.16 MHz  
 OBSET 2.41 KHz  
 OBFIN 6.01 Hz  
 POINT 13107  
 FREQU 7507.51 Hz  
 SCANS 12  
 ACQTM 1.7459 sec  
 PD 5.0000 sec  
 PW1 5.55 usec  
 IRNUC 1H  
 CTEMP 21.6 c  
 SLVNT CDCL3  
 EXREF 7.26 ppm  
 BF 0.12 Hz  
 RGAIN 30

**L3/1Pr, S**

(1<sup>st</sup> trial)

54%, 7.3/1 dr, 3.8/1 b/l

C:\Users\Valice\Desktop\Gousei\Chen\dataset\L3PrS2.als

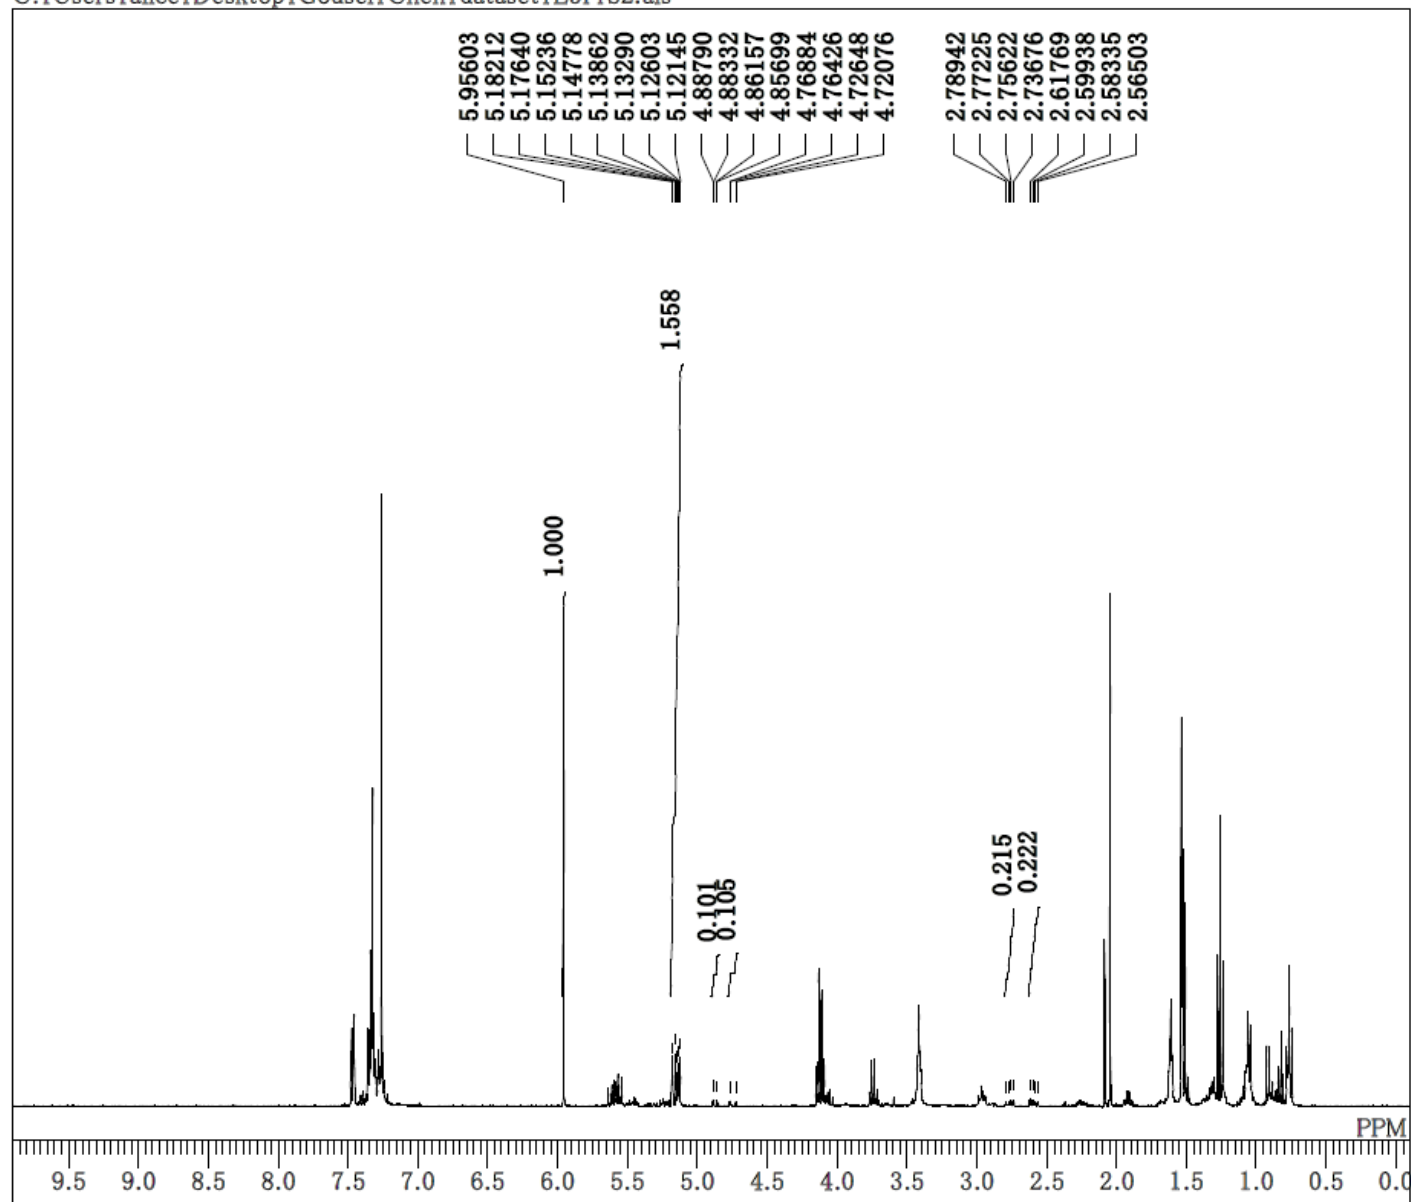

DFILE L3PrS2.als  
 COMNT  
 DATIM 23-08-2020 16:55:12  
 OBNUC 1H  
 EXMOD proton.jxp  
 OBFRQ 391.78 MHz  
 OBSET 8.51 KHz  
 OBFIN 3.34 Hz  
 POINT 13107  
 FREQU 5878.90 Hz  
 SCANS 8  
 ACQTM 2.2295 sec  
 PD 6.0000 sec  
 PW1 5.17 usec  
 IRNUC 1H  
 CTEMP 20.4 c  
 SLVNT CDCL3  
 EXREF 7.26 ppm  
 BF 0.12 Hz  
 RGAIN 42

**L3/1Pr, S**

(2<sup>nd</sup> trial)

69%, 7.6/1 dr, 4.0/1 b/l

C:\Users\Valice\Desktop\Gousei\Chen\dataset\L4EtS1.als

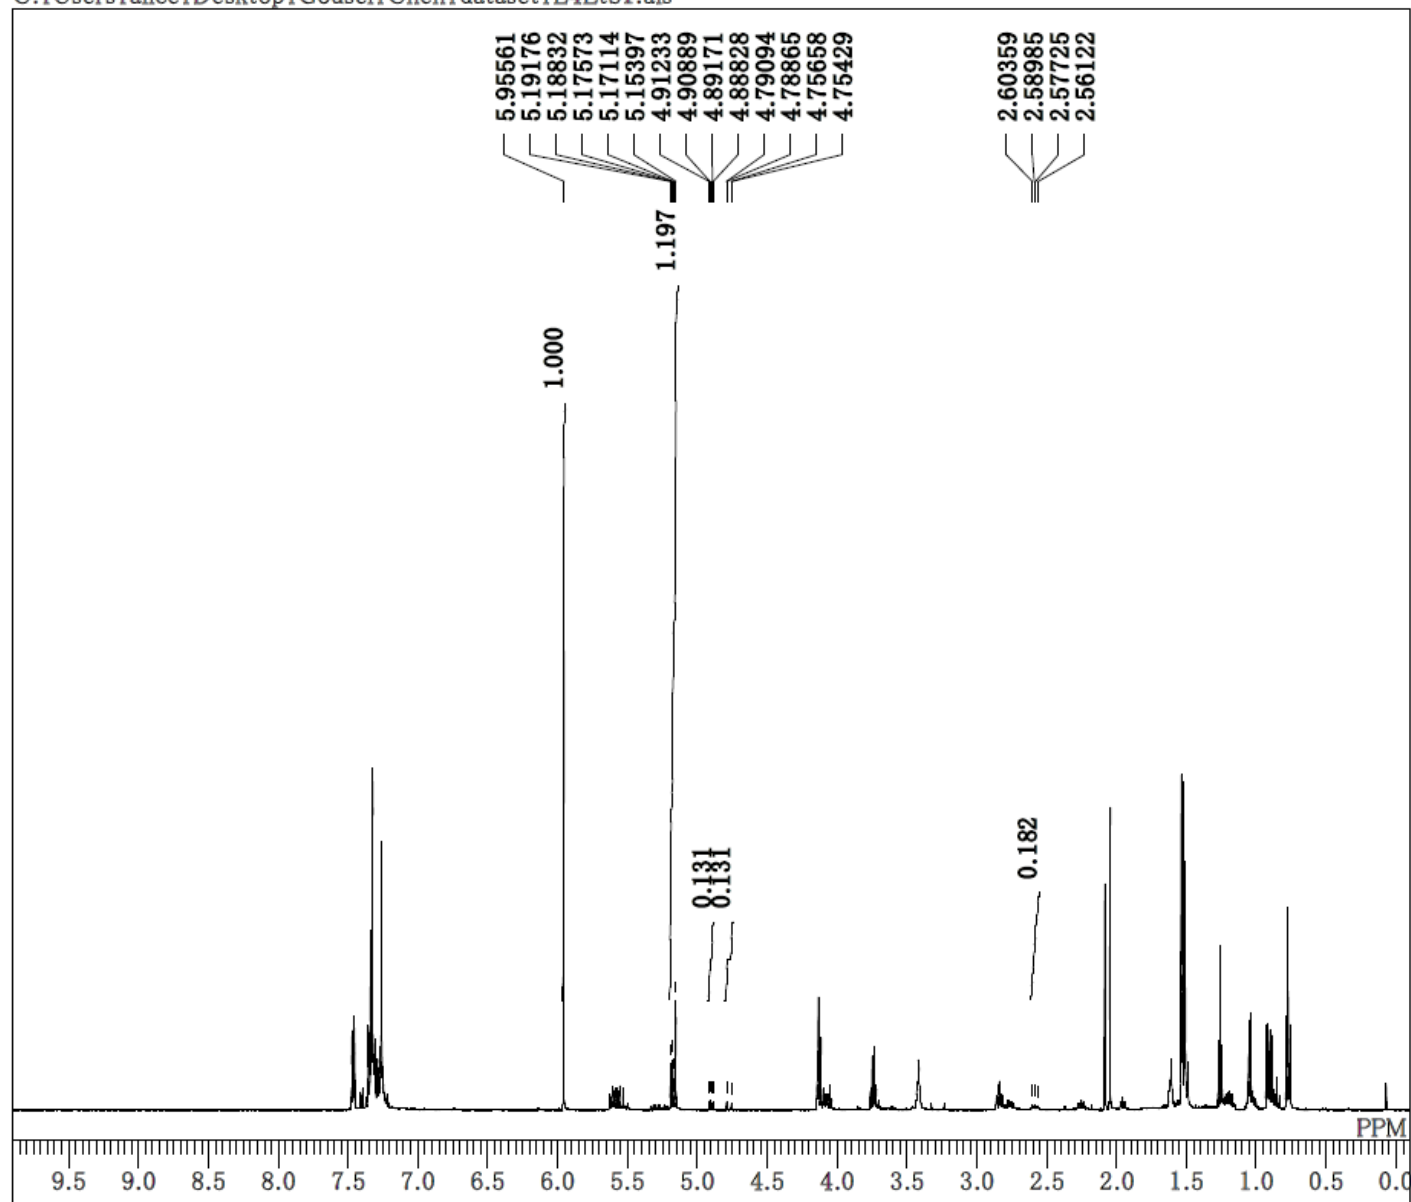

DFILE L4EtS1.als  
 COMNT  
 DATIM 2019-09-28 14:55:27  
 OBNUC 1H  
 EXMOD proton.jxp  
 OBFRQ 500.16 MHz  
 OBSET 2.41 KHz  
 OBFIN 6.01 Hz  
 POINT 13107  
 FREQU 7507.51 Hz  
 SCANS 8  
 ACQTM 1.7459 sec  
 PD 6.0000 sec  
 PW1 5.55 usec  
 IRNUC 1H  
 CTEMP 21.8 c  
 SLVNT CDCL3  
 EXREF 7.26 ppm  
 BF 0.12 Hz  
 RGAIN 40

**L4/1Et, S**  
 (1<sup>st</sup> trial)  
 57%, 4.6/1 dr, 4.0/1 b/l



C:\Users\Valice\Desktop\Gousei\Chen\dataset\L4EtS2.als

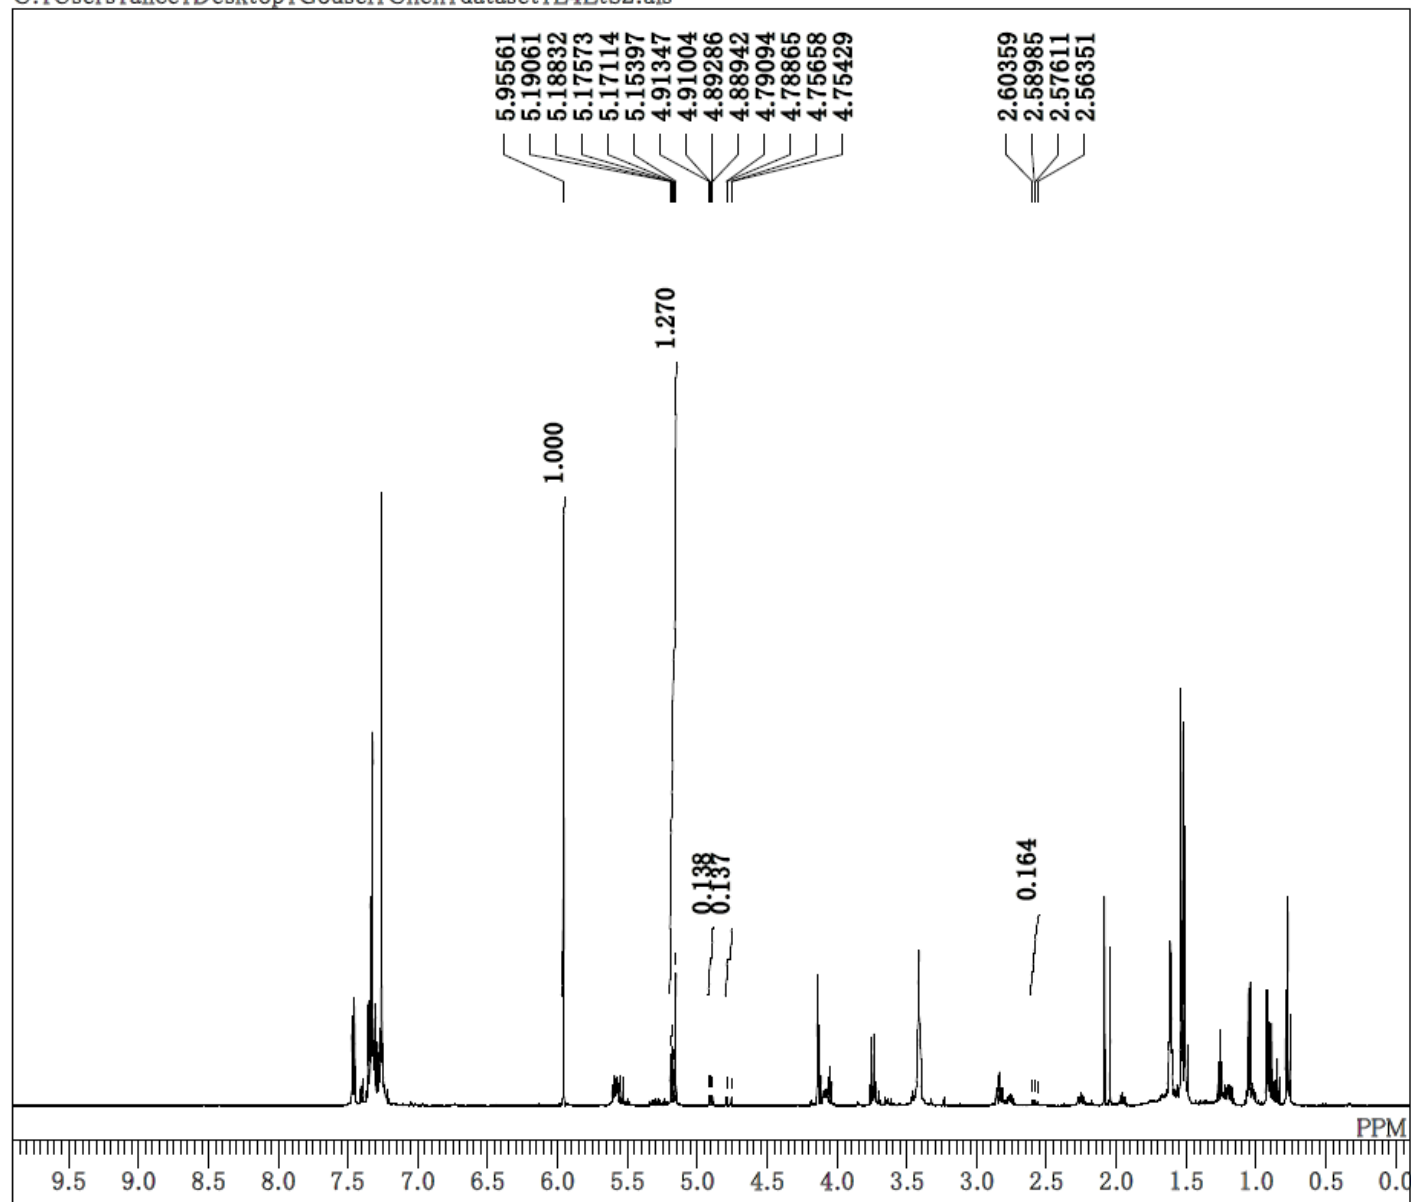

DFILE L4EtS2.als  
 COMNT  
 DATIM 2020-08-28 00:56:06  
 OBNUC 1H  
 EXMOD proton.jxp  
 OBFRQ 500.16 MHz  
 OBSET 2.41 KHz  
 OBFIN 6.01 Hz  
 POINT 13107  
 FREQU 7507.51 Hz  
 SCANS 8  
 ACQTM 1.7459 sec  
 PD 6.0000 sec  
 PW1 5.55 usec  
 IRNUC 1H  
 CTEMP 22.1 c  
 SLVNT CDCL3  
 EXREF 7.26 ppm  
 BF 0.12 Hz  
 RGAIN 42

**L4/1Et, S**

(2<sup>nd</sup> trial)

59%, 4.6/1 dr, 4.7/1 b/l

C:\Users\Valice\Desktop\Gousei\Chen\dataset\L4PrS1.als

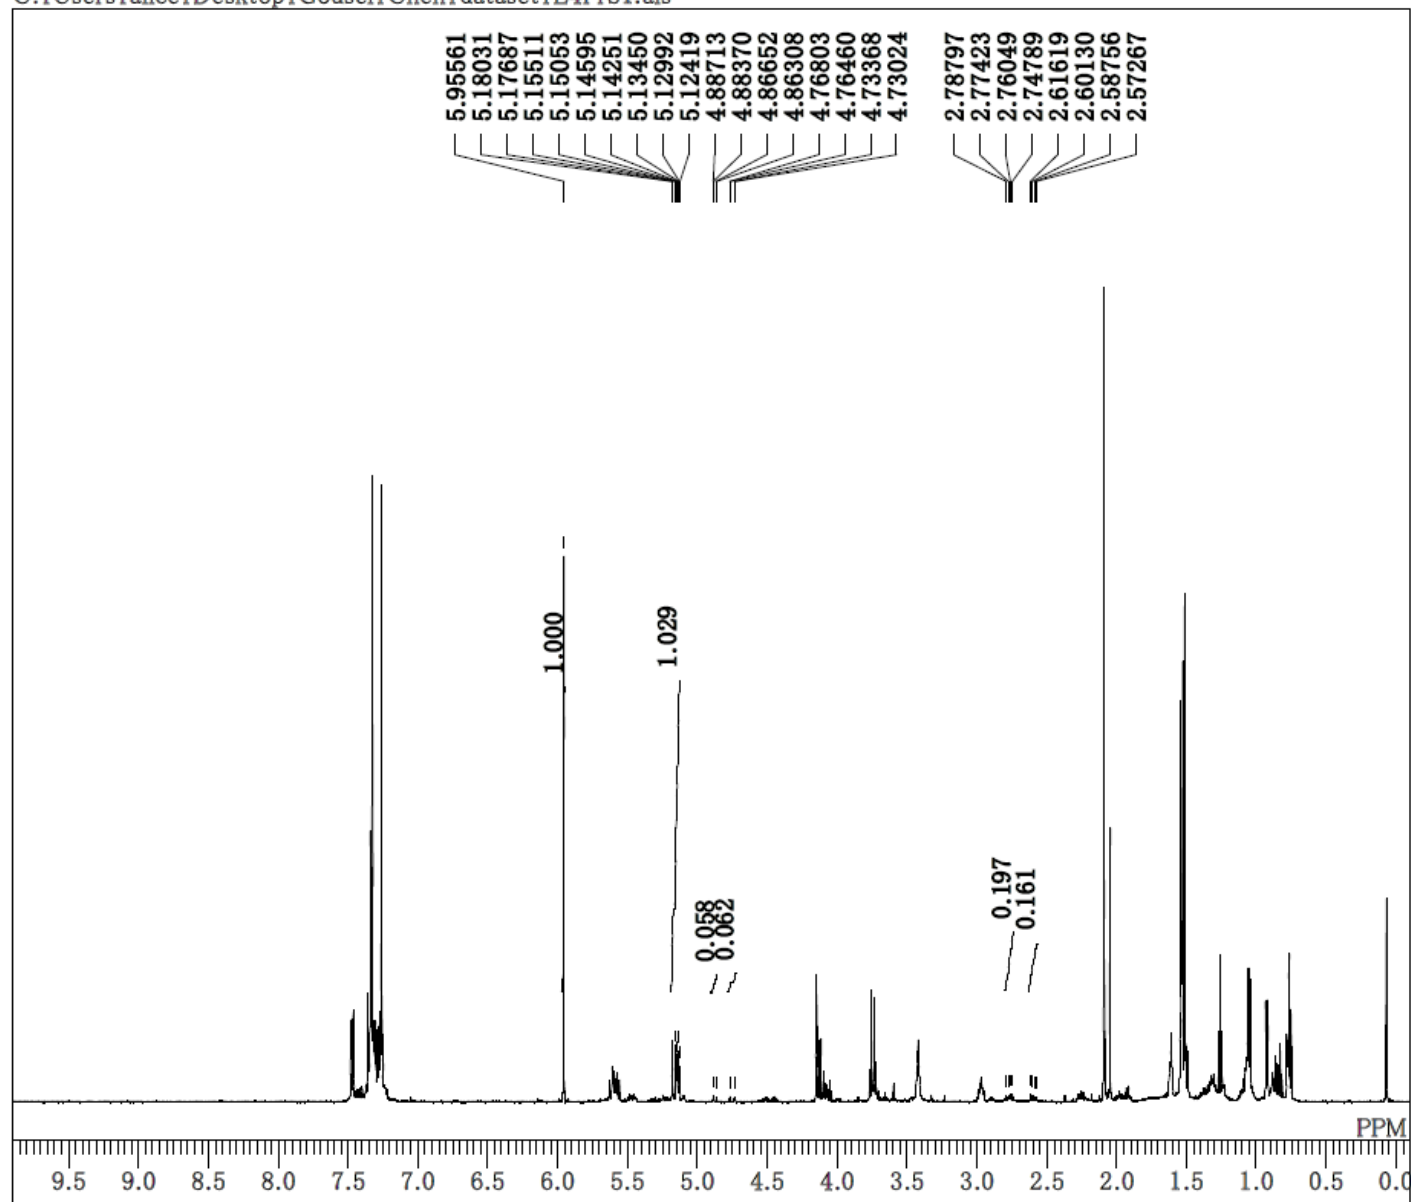

DFILE L4PrS1.als  
 COMNT  
 DATIM 2019-09-28 15:11:53  
 OBNUC 1H  
 EXMOD proton.jxp  
 OBFRQ 500.16 MHz  
 OBSET 2.41 KHz  
 OBFIN 6.01 Hz  
 POINT 13107  
 FREQU 7507.51 Hz  
 SCANS 8  
 ACQTM 1.7459 sec  
 PD 6.0000 sec  
 PW1 5.55 usec  
 IRNUC 1H  
 CTEMP 21.7 c  
 SLVNT CDCL3  
 EXREF 7.26 ppm  
 BF 0.12 Hz  
 RGAIN 42

**L4/1Pr, S**

(1<sup>st</sup> trial)

47%, 8.6/1 dr, 3.2/1 b/l

C:\Users\Valice\Desktop\Gousei\Chen\dataset\L4PrS2.als

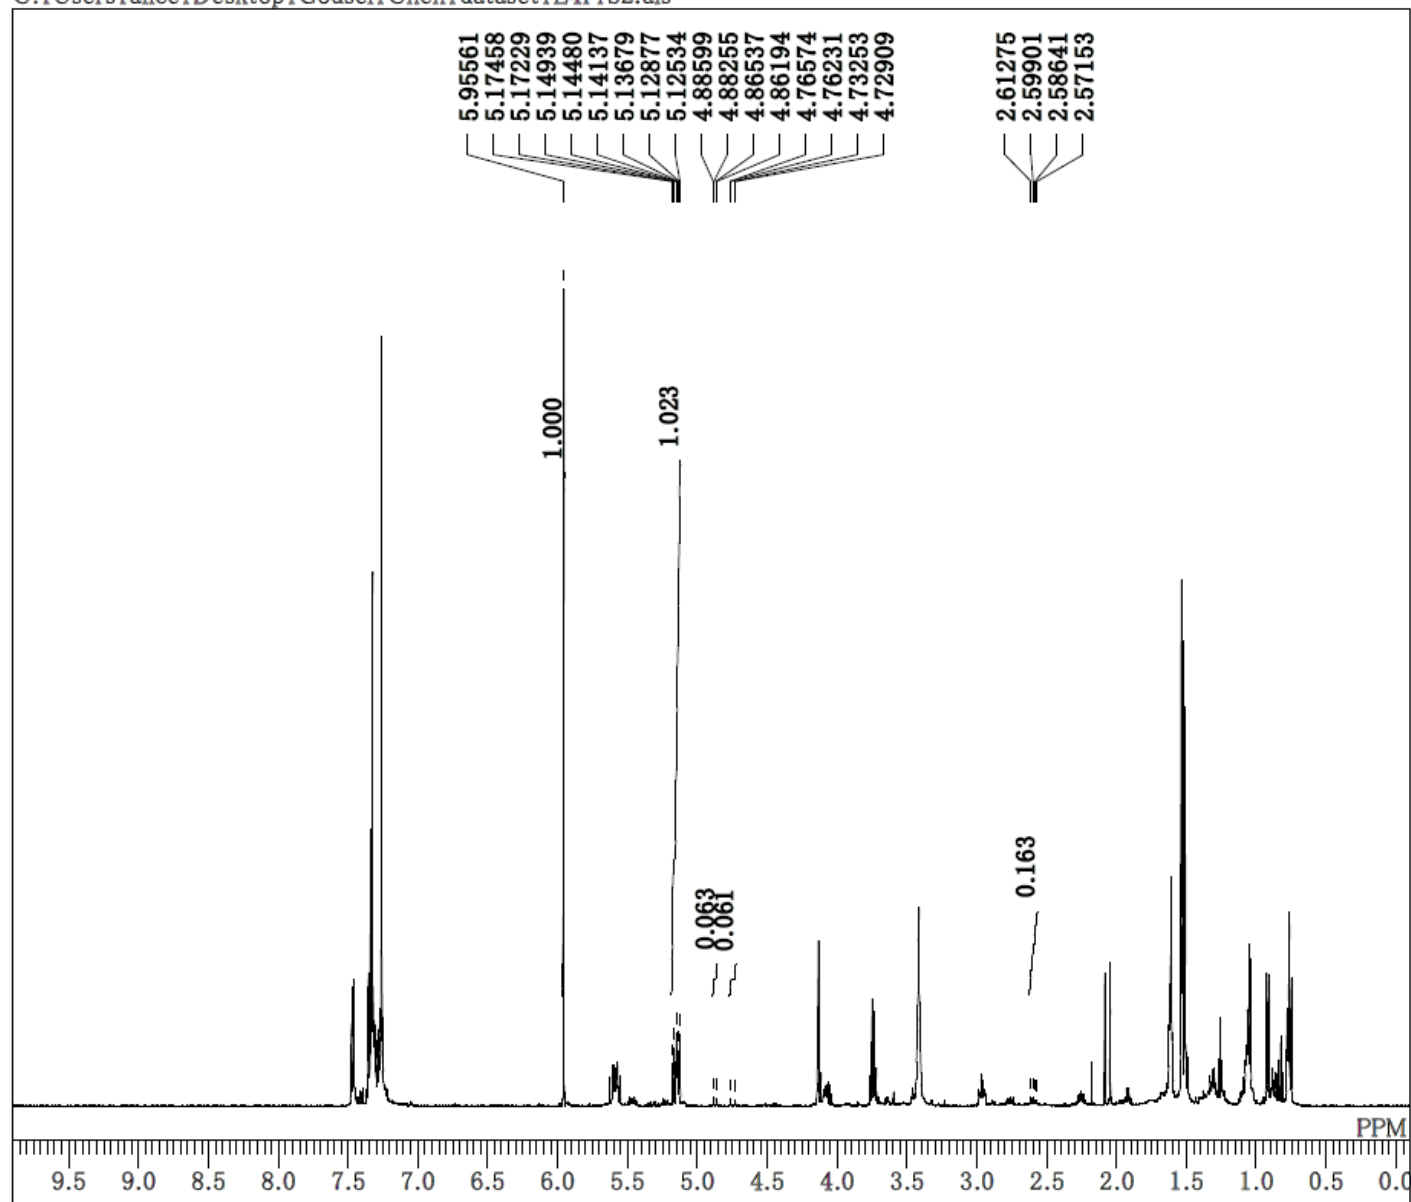

DFILE L4PrS2.als  
 COMNT  
 DATIM 2020-08-28 01:05:02  
 OBNUC 1H  
 EXMOD proton.jxp  
 OBFRQ 500.16 MHz  
 OBSET 2.41 KHz  
 OBFIN 6.01 Hz  
 POINT 13107  
 FREQU 7507.51 Hz  
 SCANS 8  
 ACQTM 1.7459 sec  
 PD 6.0000 sec  
 PW1 5.55 usec  
 IRNUC 1H  
 CTEMP 21.9 c  
 SLVNT CDCL3  
 EXREF 7.26 ppm  
 BF 0.12 Hz  
 RGAIN 42

**L4/1Pr, S**

(2<sup>nd</sup> trial)

46%, 8.3/1 dr, 3.5/1 b/l

C:\Users\Valice\Desktop\Gousei\Chen\aaaaaaaaaaaa\L5EtS1.als

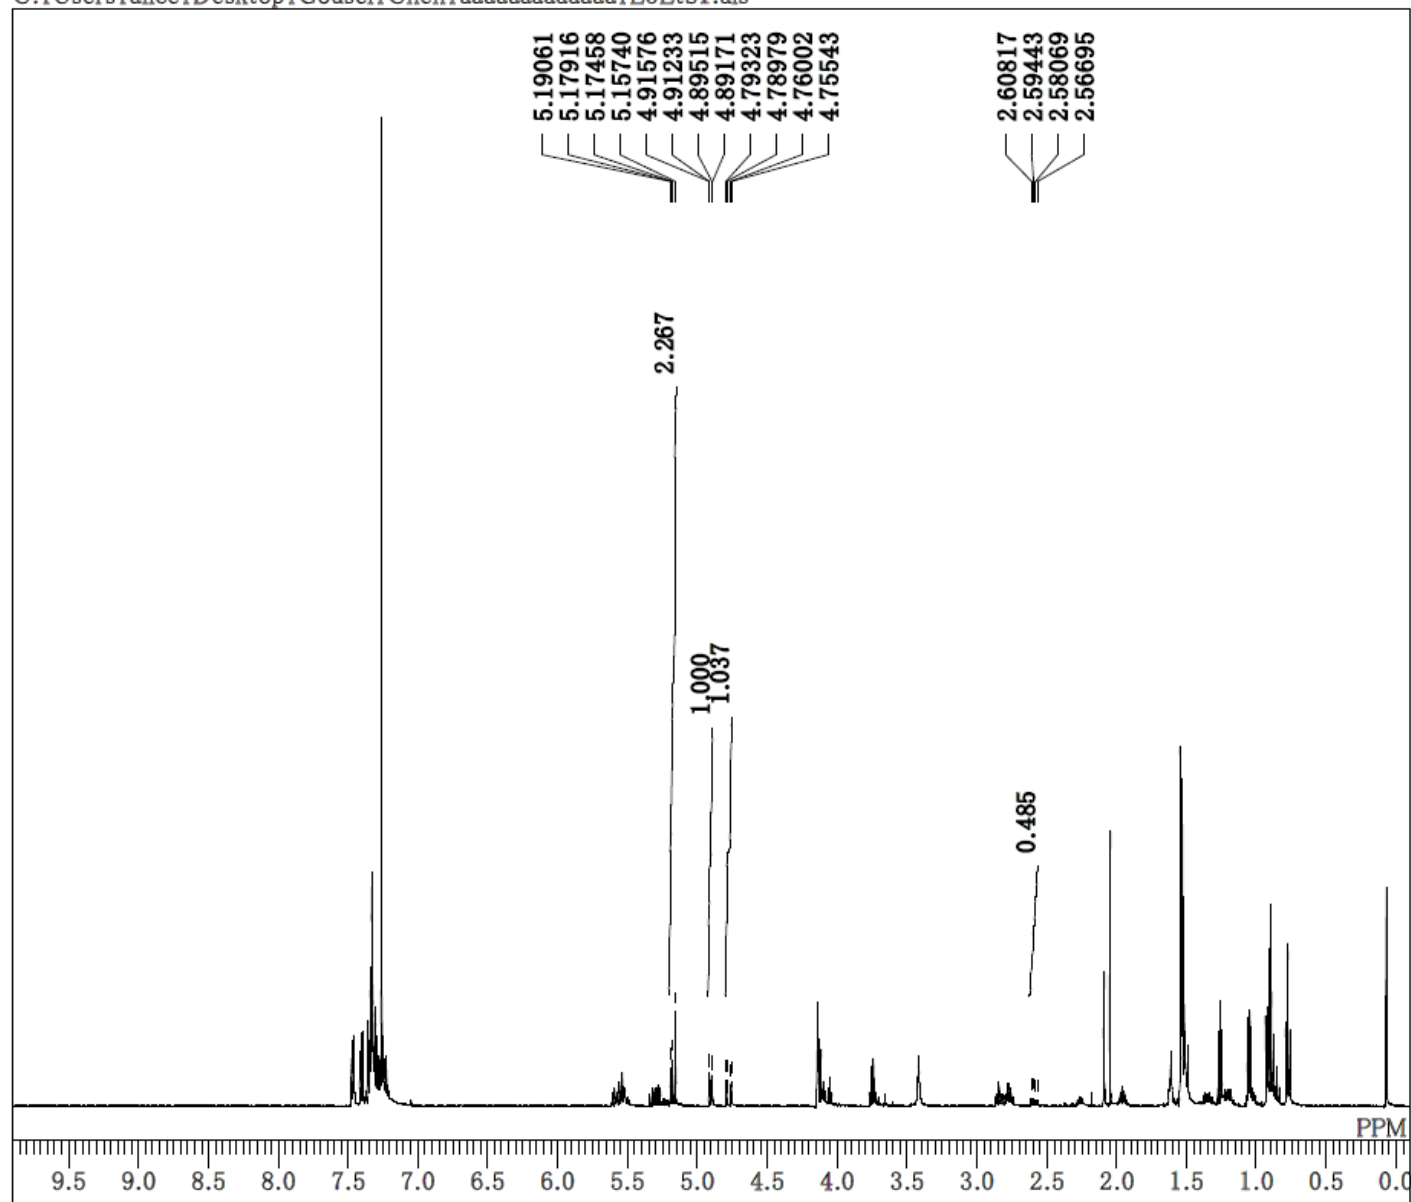

DFILE L5EtS1.als  
COMNT  
DATIM 2018-11-13 15:43:30  
OBNUC 1H  
EXMOD proton.jxp  
OBFRQ 500.16 MHz  
OBSET 2.41 KHz  
OBFIN 6.01 Hz  
POINT 13107  
FREQU 7507.51 Hz  
SCANS 8  
ACQTM 1.7459 sec  
PD 5.0000 sec  
PW1 5.55 usec  
IRNUC 1H  
CTEMP 21.9 c  
SLVNT CDCL3  
EXREF 7.26 ppm  
BF 0.12 Hz  
RGAIN 34

**L5/1Et, S**

(1<sup>st</sup> trial)

68%, 1.1/1 dr, 4.4/1 b/l

C:\Users\Valice\Desktop\Gousei\Chen\dataset\L5EtS2.als

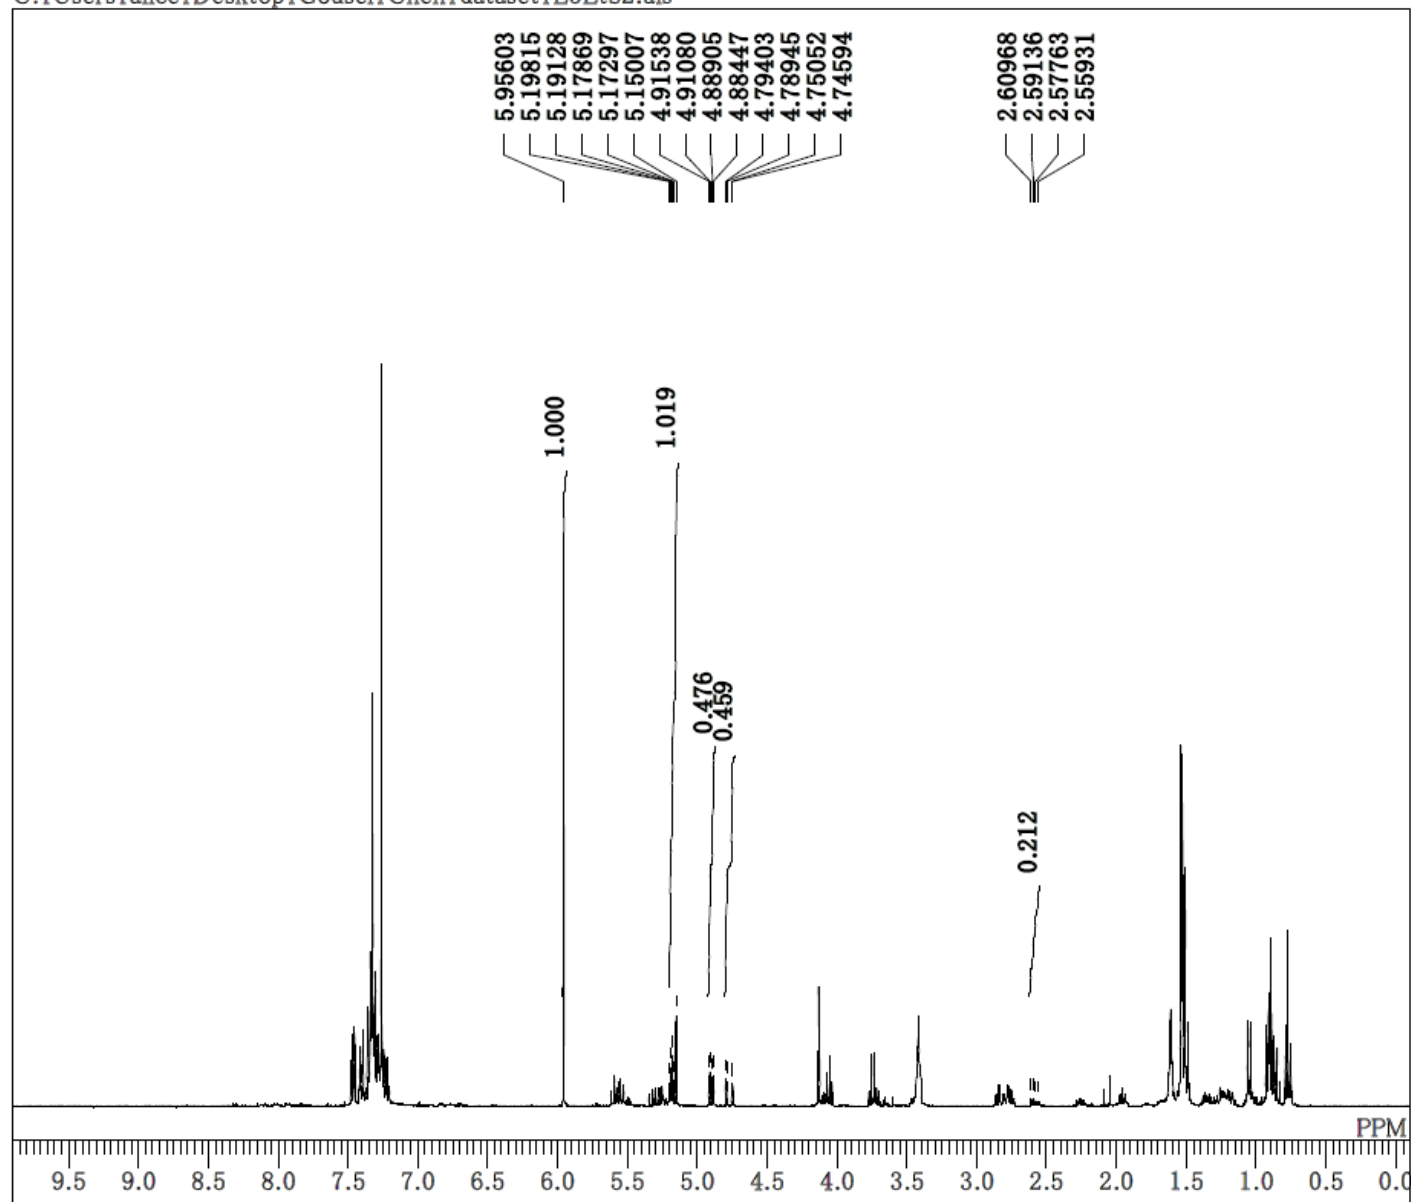

DFILE L5EtS2.als  
COMNT  
DATIM 29-08-2020 22:14:28  
OBNUC 1H  
EXMOD proton.jxp  
OBFRQ 391.78 MHz  
OBSET 8.51 KHz  
OBFIN 3.34 Hz  
POINT 13107  
FREQU 5878.90 Hz  
SCANS 8  
ACQTM 2.2295 sec  
PD 6.0000 sec  
PW1 5.17 usec  
IRNUC 1H  
CTEMP 20.4 c  
SLVNT CDCL3  
EXREF 7.26 ppm  
BF 0.12 Hz  
RGAIN 42

**L5/1Et, S**

(2<sup>nd</sup> trial)

75%, 1.1/1 dr, 4.6/1 b/l

C:\Users\Valice\Desktop\Gousei\Chen\aaaaaaaaaaaa\L5PrS1.als

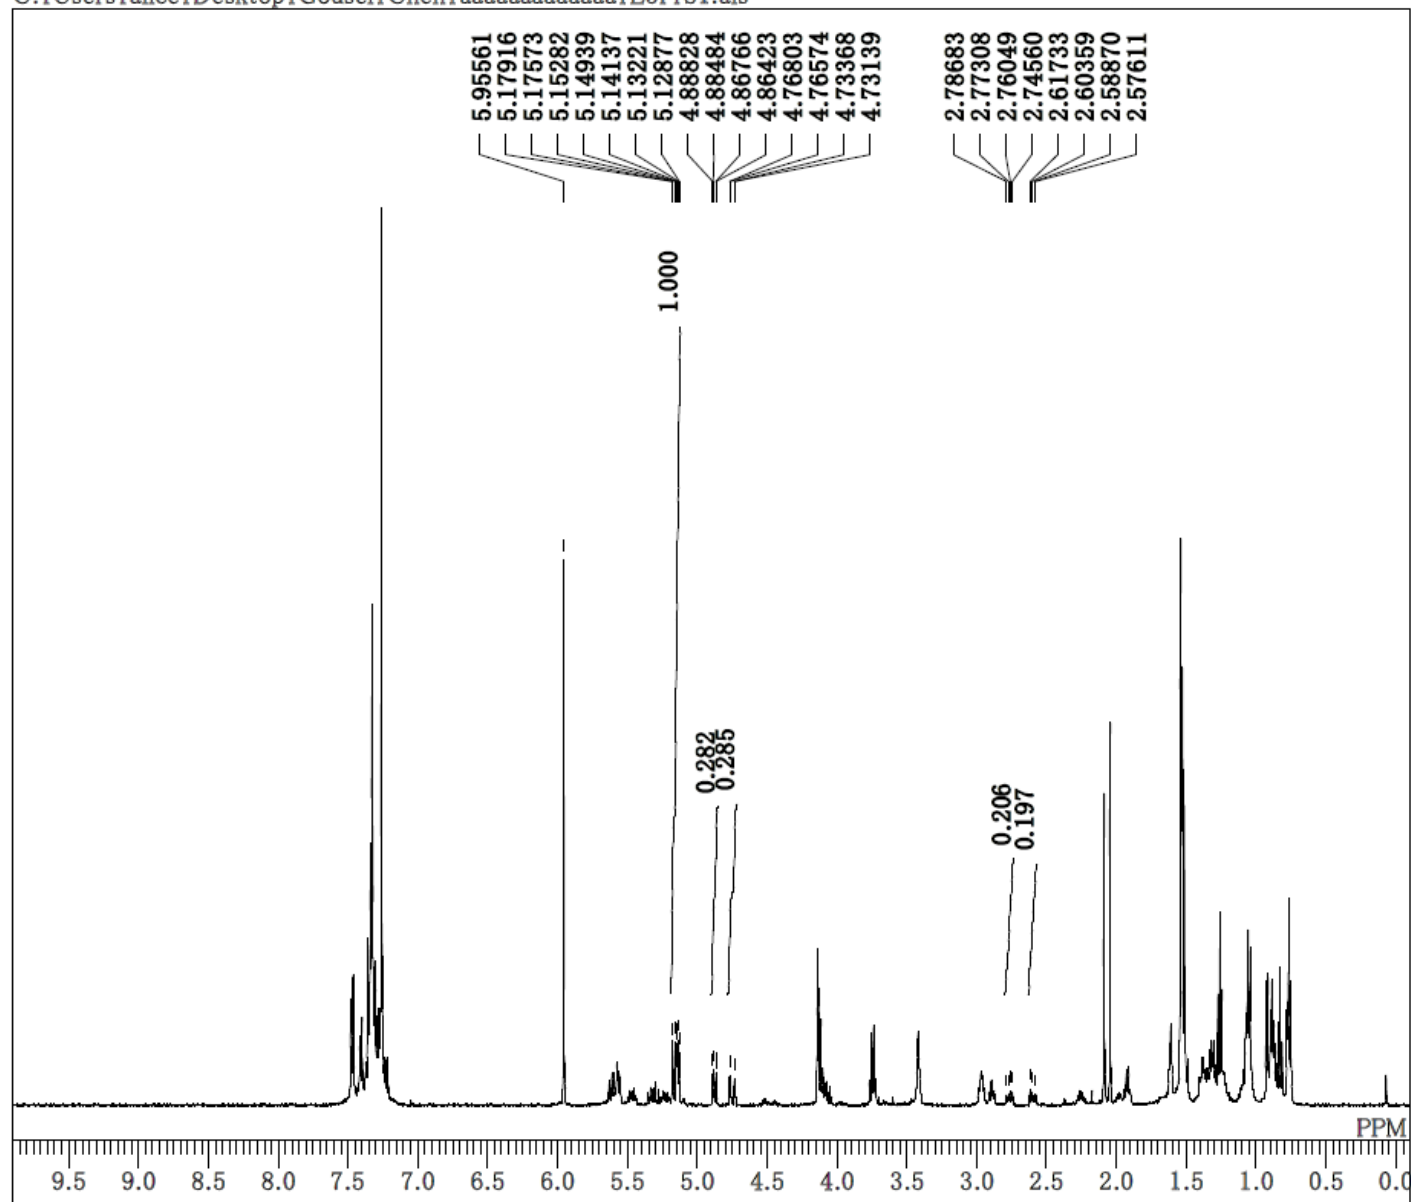

DFILE L5PrS1.als  
 COMNT  
 DATIM 2018-11-11 23:32:49  
 OBNUC 1H  
 EXMOD proton.jxp  
 OBFRQ 500.16 MHz  
 OBSET 2.41 KHz  
 OBFIN 6.01 Hz  
 POINT 13107  
 FREQU 7507.51 Hz  
 SCANS 8  
 ACQTM 1.7459 sec  
 PD 5.0000 sec  
 PW1 5.55 usec  
 IRNUC 1H  
 CTEMP 21.7 c  
 SLVNT CDCL3  
 EXREF 7.26 ppm  
 BF 0.12 Hz  
 RGAIN 32

**L5/1Pr, S**

(1<sup>st</sup> trial)

66%, 1.7/1 dr, 3.7/1 b/l

C:\Users\Valice\Desktop\Gousei\Chen\dataset\L5PrS2.als

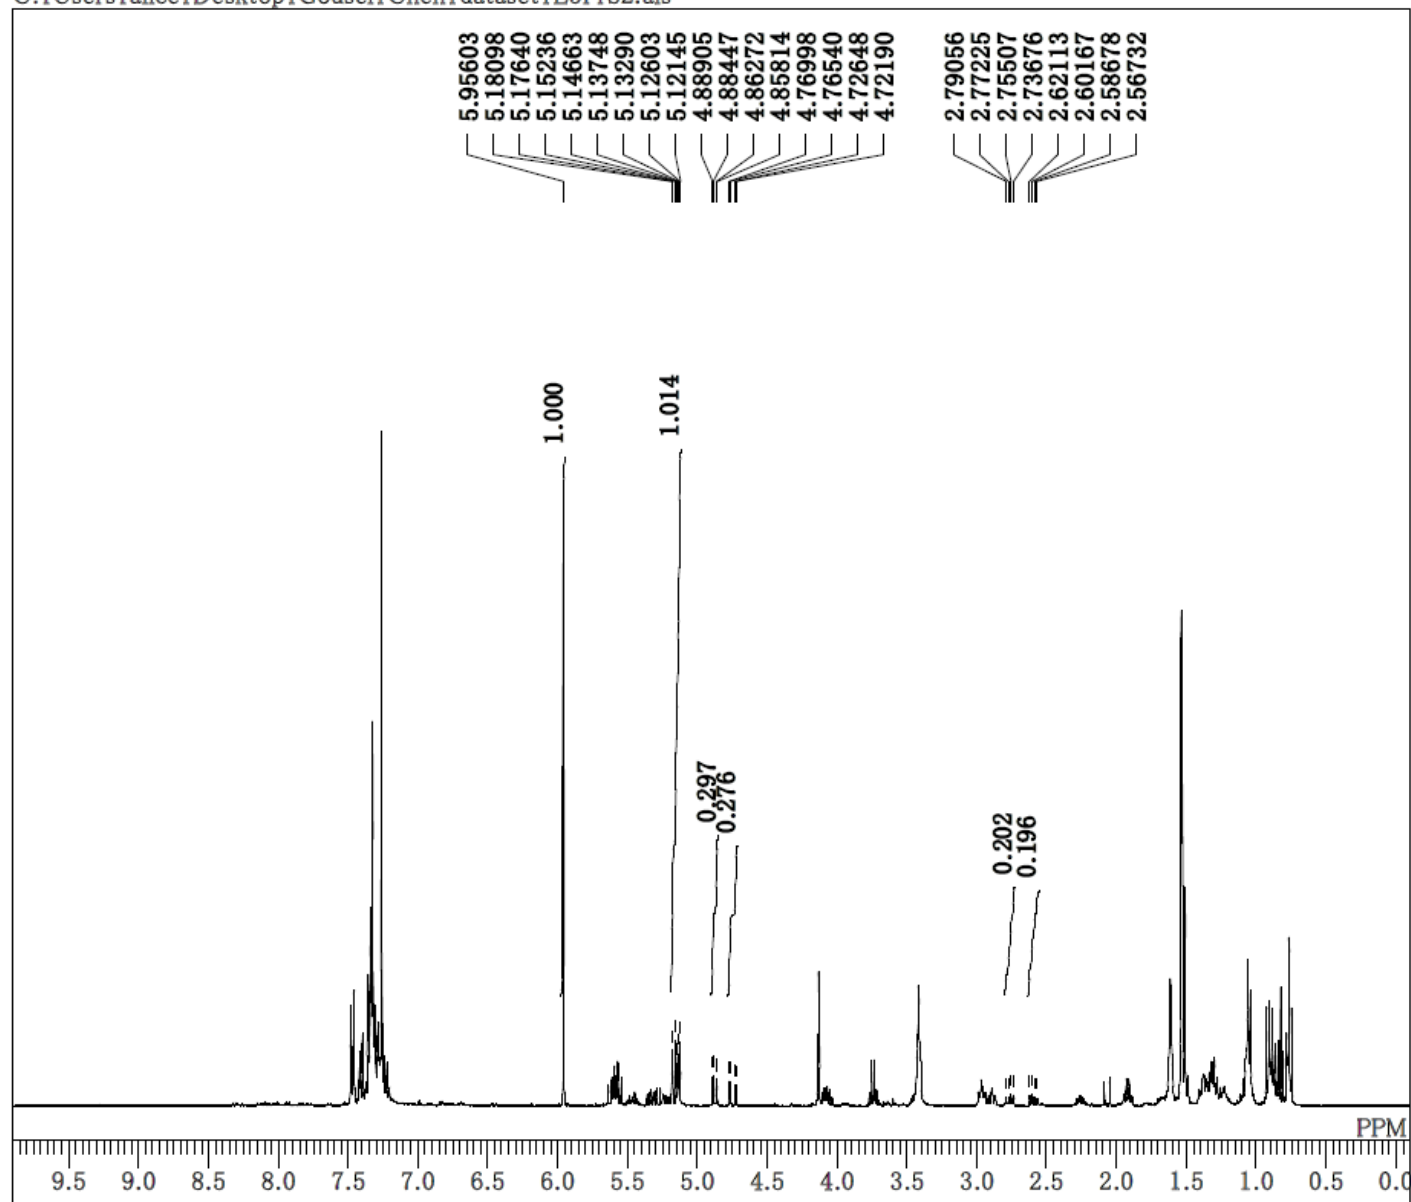

DFILE L5PrS2.als  
 COMNT  
 DATIM 29-08-2020 22:22:03  
 OBNUC 1H  
 EXMOD proton.jxp  
 OBFRQ 391.78 MHz  
 OBSET 8.51 KHz  
 OBFIN 3.34 Hz  
 POINT 13107  
 FREQU 5878.90 Hz  
 SCANS 8  
 ACQTM 2.2295 sec  
 PD 6.0000 sec  
 PW1 5.17 usec  
 IRNUC 1H  
 CTEMP 20.4 c  
 SLVNT CDCL3  
 EXREF 7.26 ppm  
 BF 0.12 Hz  
 RGAIN 42

**L5/1Pr, S**

(2<sup>nd</sup> trial)

63%, 1.8/1 dr, 4.0/1 b/l

C:\Users\Valice\Desktop\Gousei\Chen\dataset\L6EtS1.als

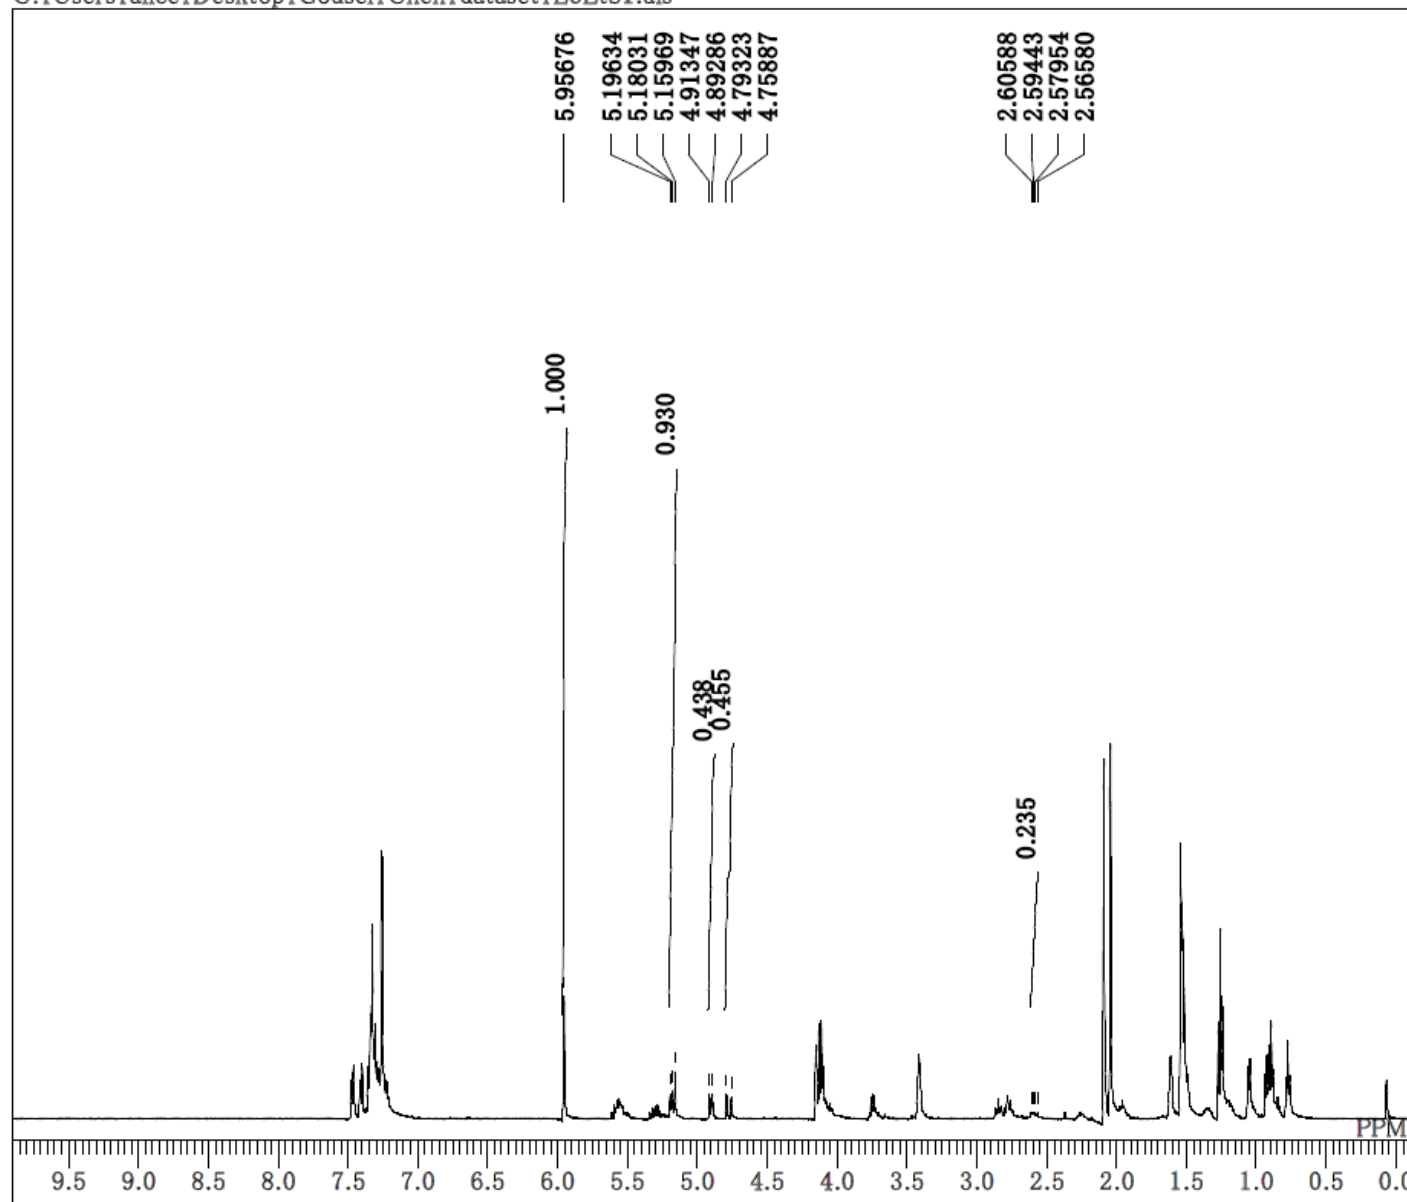

DFILE L6EtS1.als  
 COMNT  
 DATIM 2018-11-23 13:11:50  
 OBNUC 1H  
 EXMOD proton.jxp  
 OBFRQ 500.16 MHz  
 OBSET 2.41 KHz  
 OBFIN 6.01 Hz  
 POINT 13107  
 FREQU 7507.51 Hz  
 SCANS 8  
 ACQTM 1.7459 sec  
 PD 5.0000 sec  
 PW1 5.55 usec  
 IRNUC 1H  
 CTEMP 21.9 c  
 SLVNT CDCL3  
 EXREF 7.26 ppm  
 BF 0.12 Hz  
 RGAIN 32

**L6/1Et, S**

(1<sup>st</sup> trial)

72%, 1.0/1 dr, 3.9/1 b/l



C:\Users\Valice\Desktop\Gousei\Chen\dataset\L6EtS2.als

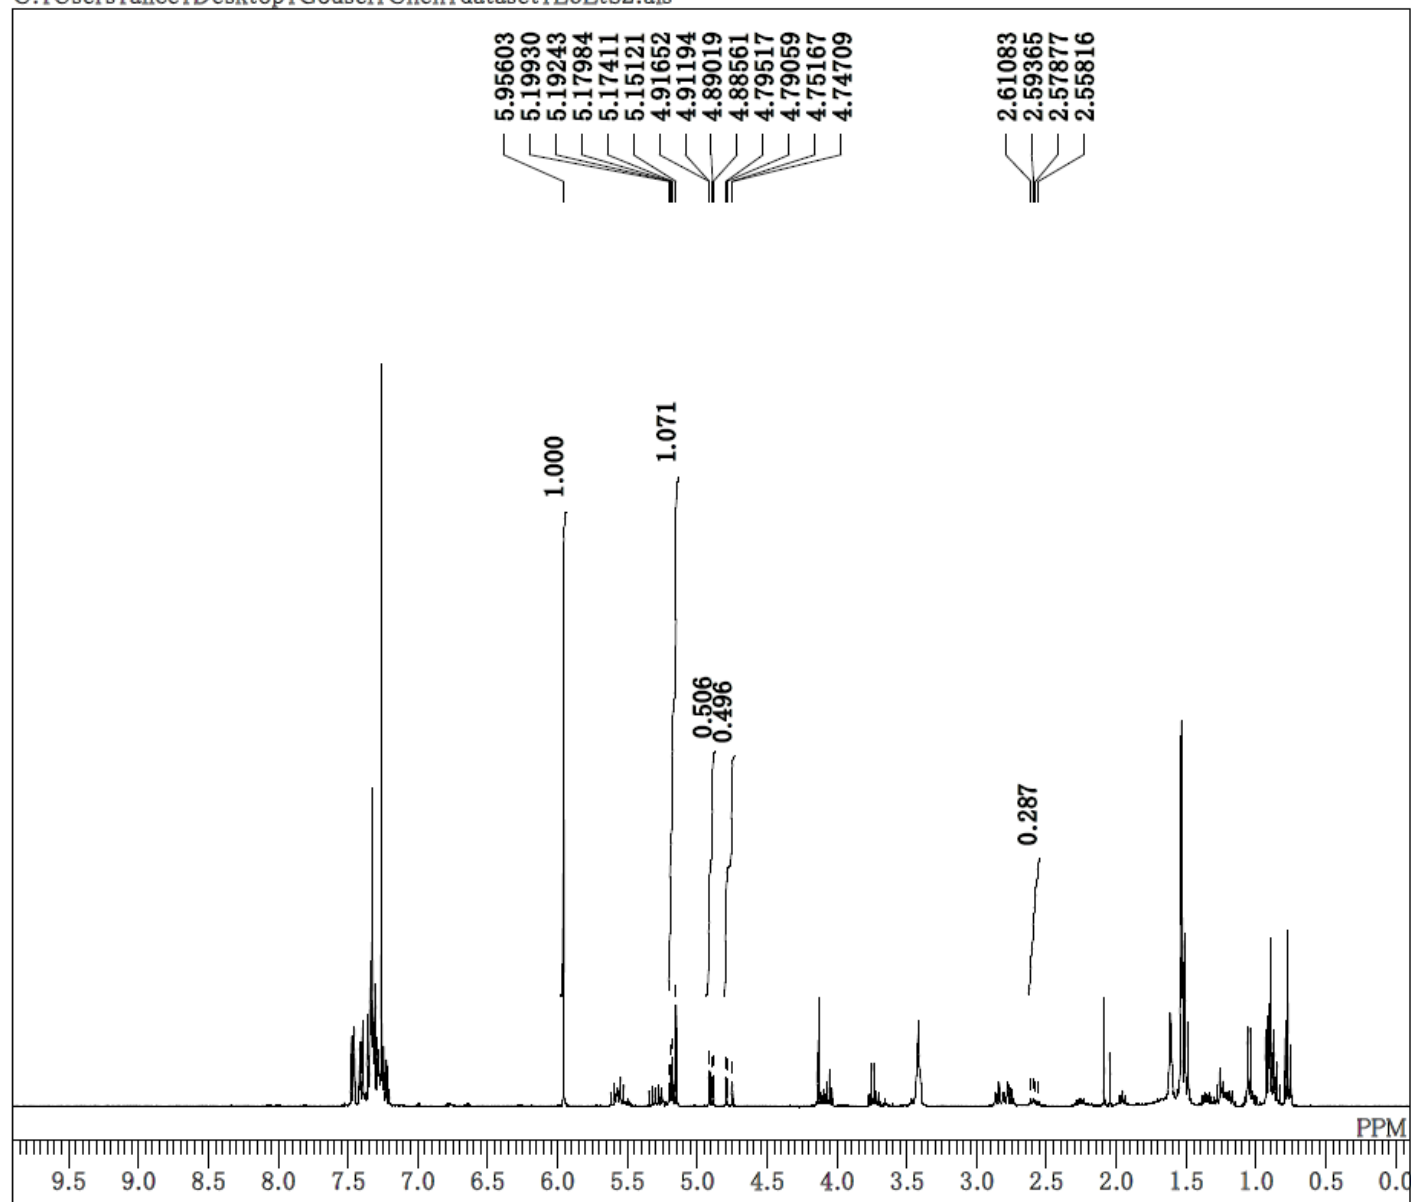

DFILE L6EtS2.als  
COMNT  
DATIM 04-09-2020 01:27:06  
OBNUC 1H  
EXMOD proton.jxp  
OBFRQ 391.78 MHz  
OBSET 8.51 KHz  
OBFIN 3.34 Hz  
POINT 13107  
FREQU 5878.90 Hz  
SCANS 8  
ACQTM 2.2295 sec  
PD 6.0000 sec  
PW1 5.17 usec  
IRNUC 1H  
CTEMP 21.1 c  
SLVNT CDCL3  
EXREF 7.26 ppm  
BF 0.12 Hz  
RGAIN 42

**L6/1Et, S**

(2<sup>nd</sup> trial)

83%, 1.1/1 dr, 3.6/1 b/l

C:\Users\Valice\Desktop\Gousei\Chen\dataset\L6PrS1.als

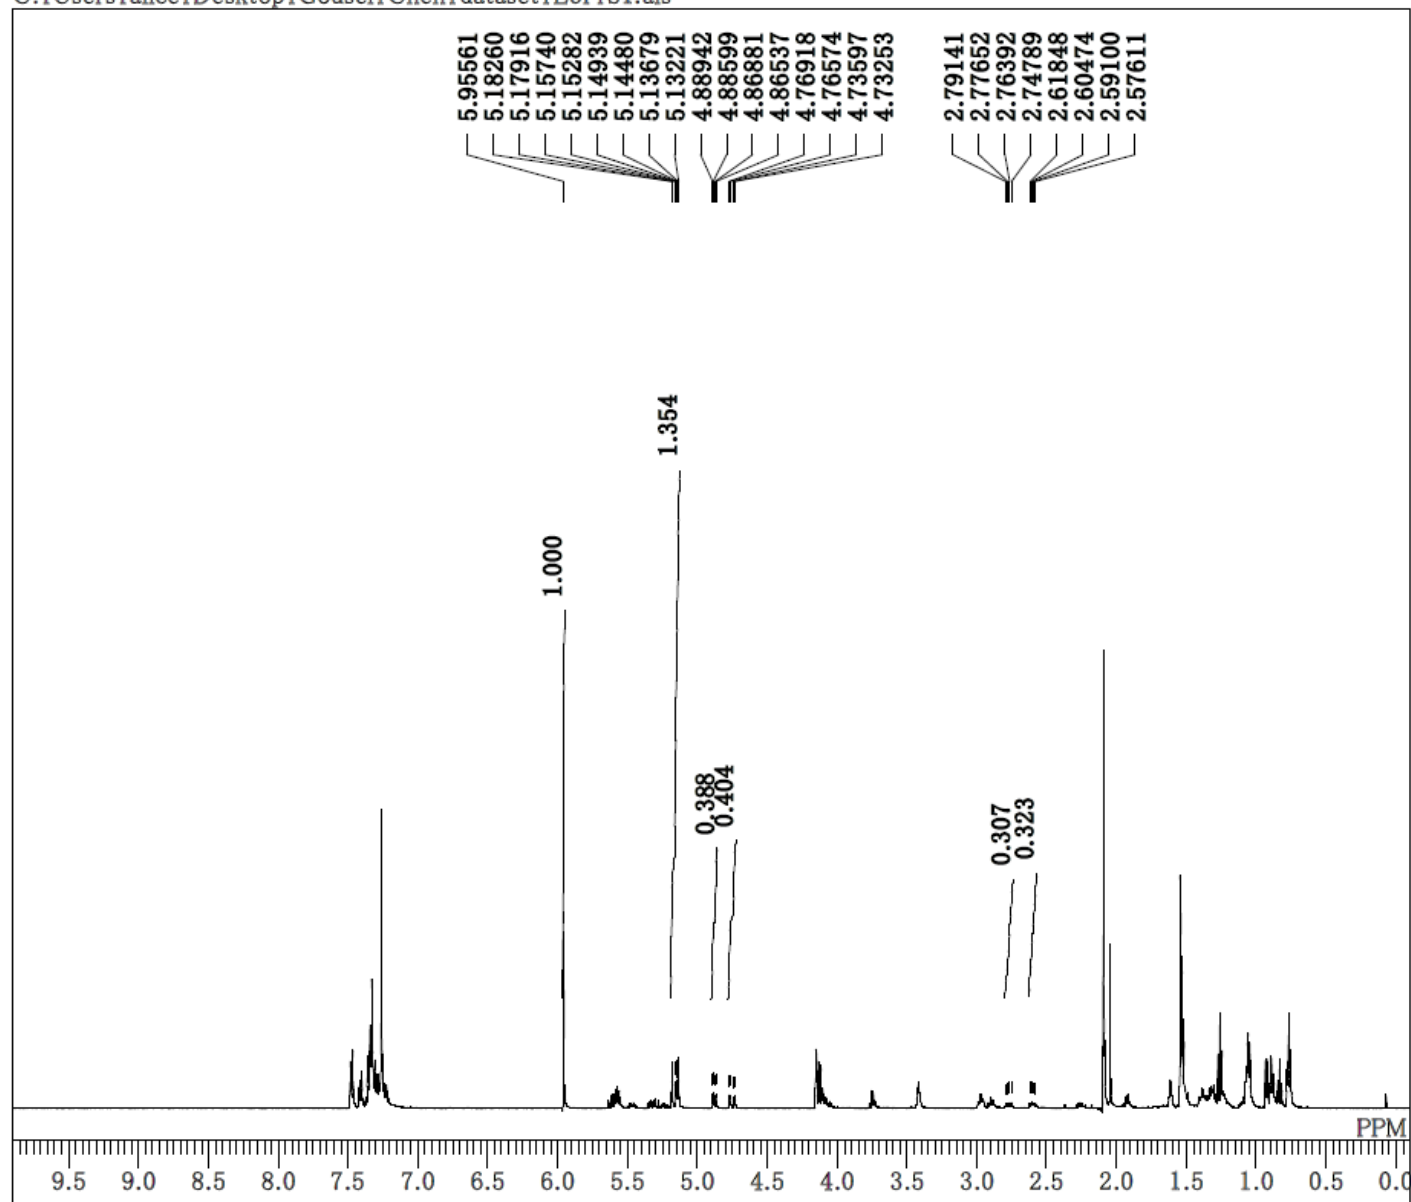

DFILE L6PrS1.als  
 COMNT  
 DATIM 2018-11-21 15:38:45  
 OBNUC 1H  
 EXMOD proton.jxp  
 OBFRQ 500.16 MHz  
 OBSET 2.41 KHz  
 OBFIN 6.01 Hz  
 POINT 13107  
 FREQU 7507.51 Hz  
 SCANS 8  
 ACQTM 1.7459 sec  
 PD 5.0000 sec  
 PW1 5.55 usec  
 IRNUC 1H  
 CTEMP 21.8 c  
 SLVNT CDCL3  
 EXREF 7.26 ppm  
 BF 0.12 Hz  
 RGAIN 32

**L6/1Pr, S**

(1<sup>st</sup> trial)

87%, 1.7/1 dr, 3.4/1 b/l

C:\Users\Valice\Desktop\Gousei\Chen\dataset\L6PrS2.als

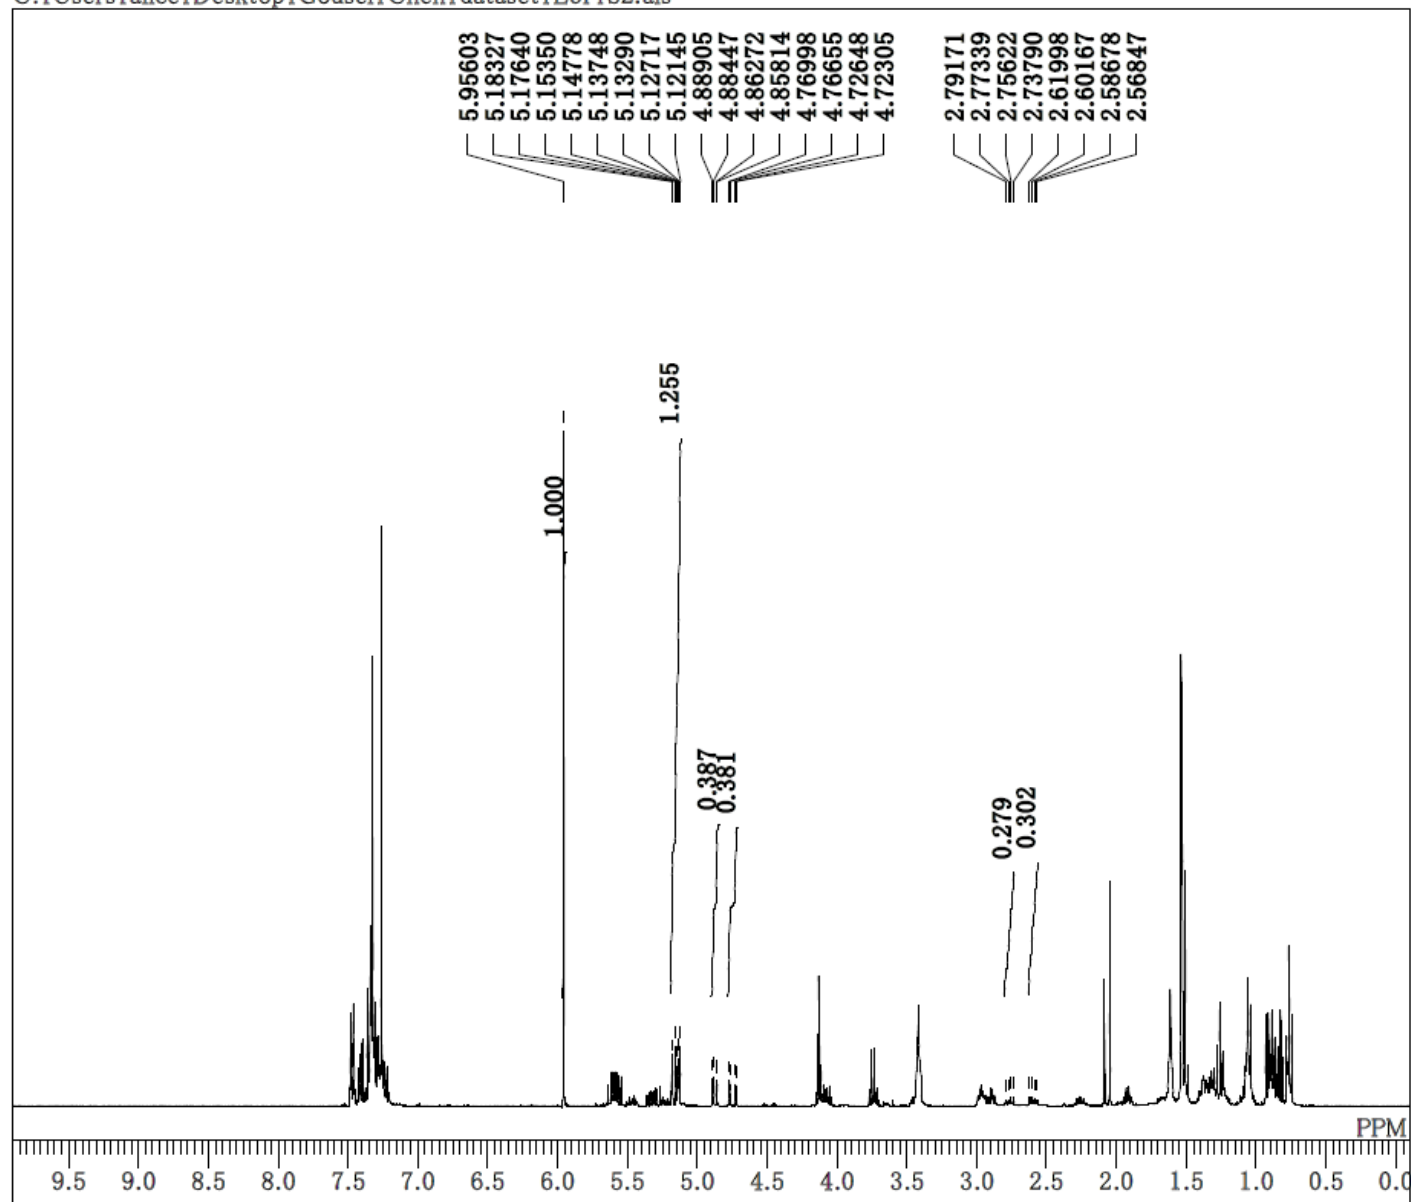

DFILE L6PrS2.als  
 COMNT  
 DATIM 04-09-2020 01:35:30  
 OBNUC 1H  
 EXMOD proton.jxp  
 OBFRQ 391.78 MHz  
 OBSET 8.51 KHz  
 OBFIN 3.34 Hz  
 POINT 13107  
 FREQU 5878.90 Hz  
 SCANS 8  
 ACQTM 2.2295 sec  
 PD 6.0000 sec  
 PW1 5.17 usec  
 IRNUC 1H  
 CTEMP 21.0 c  
 SLVNT CDCL3  
 EXREF 7.26 ppm  
 BF 0.12 Hz  
 RGAIN 38

**L6/1Pr, S**

(2<sup>nd</sup> trial)

82%, 1.6/1 dr, 3.5/1 b/l

C:\Users\Valice\Desktop\Gousei\Chen\dataset\L7EtS1.als

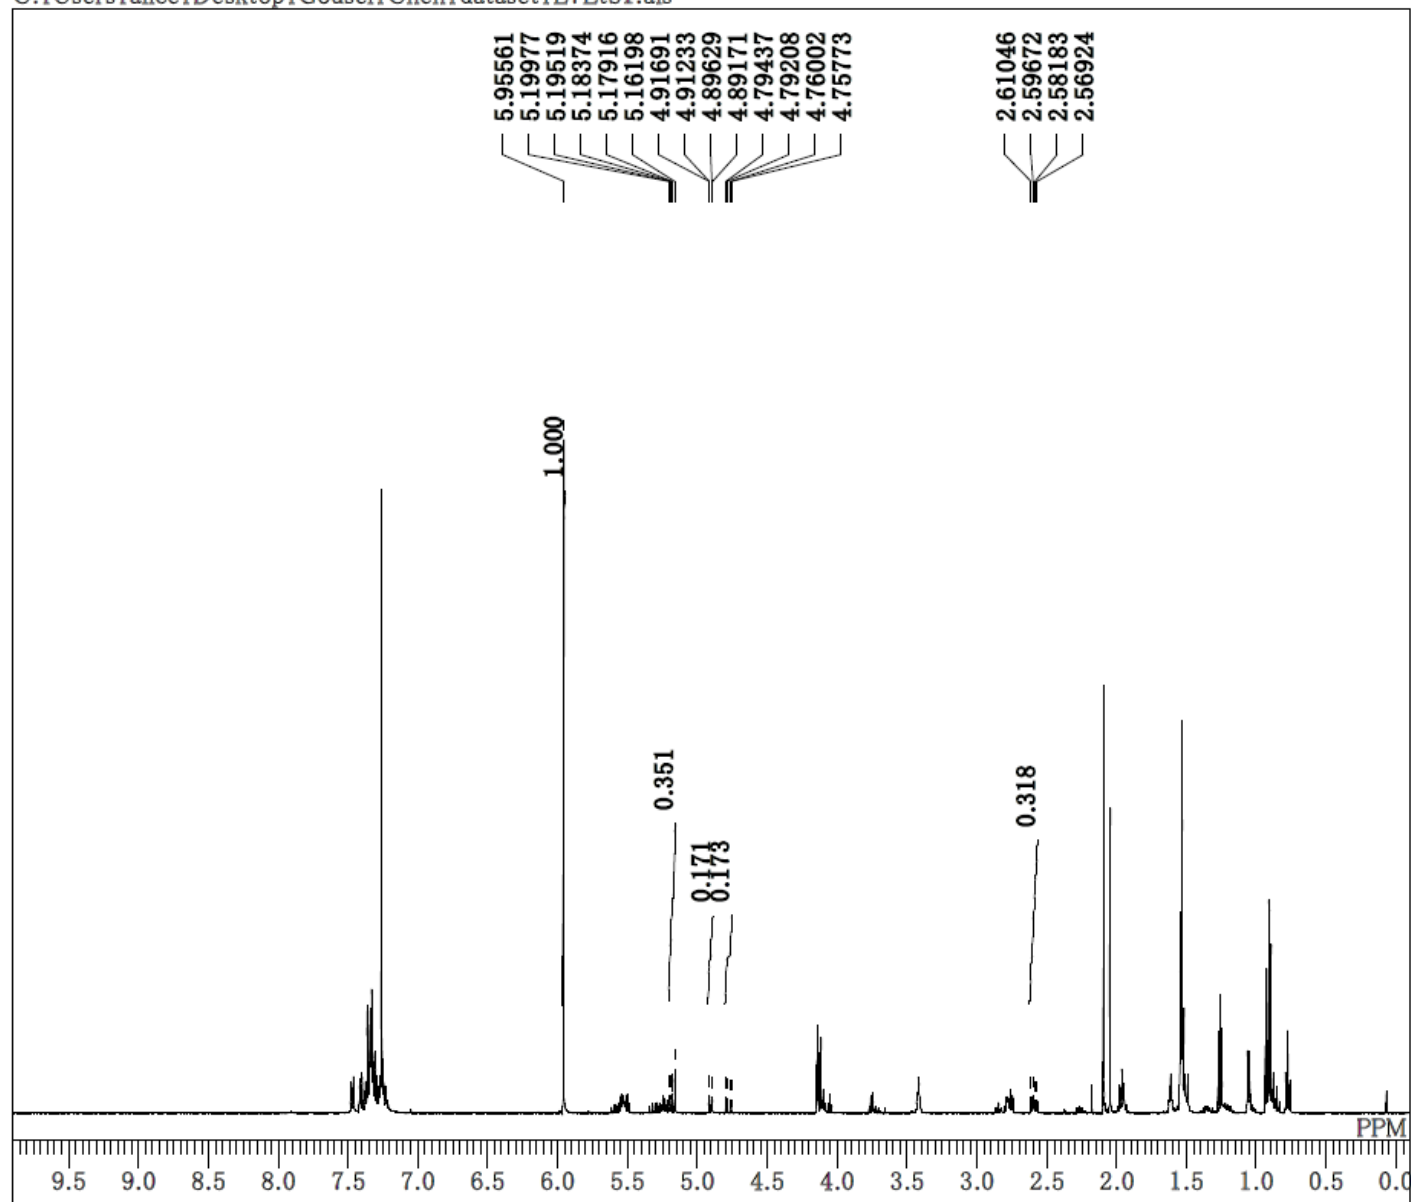

DFILE L7EtS1.als  
 COMNT  
 DATIM 2018-11-13 16:01:51  
 OBNUC 1H  
 EXMOD proton.jxp  
 OBFRQ 500.16 MHz  
 OBSET 2.41 KHz  
 OBFIN 6.01 Hz  
 POINT 13107  
 FREQU 7507.51 Hz  
 SCANS 8  
 ACQTM 1.7459 sec  
 PD 5.0000 sec  
 PW1 5.55 usec  
 IRNUC 1H  
 CTEMP 22.0 c  
 SLVNT CDCL3  
 EXREF 7.26 ppm  
 BF 0.12 Hz  
 RGAIN 32

**L7/1Et, S**

(1<sup>st</sup> trial)

84%, 1.1/1 dr, 1.1/1 b/l

C:\Users\Valice\Desktop\Gousei\Chen\dataset\L7EtS2.als

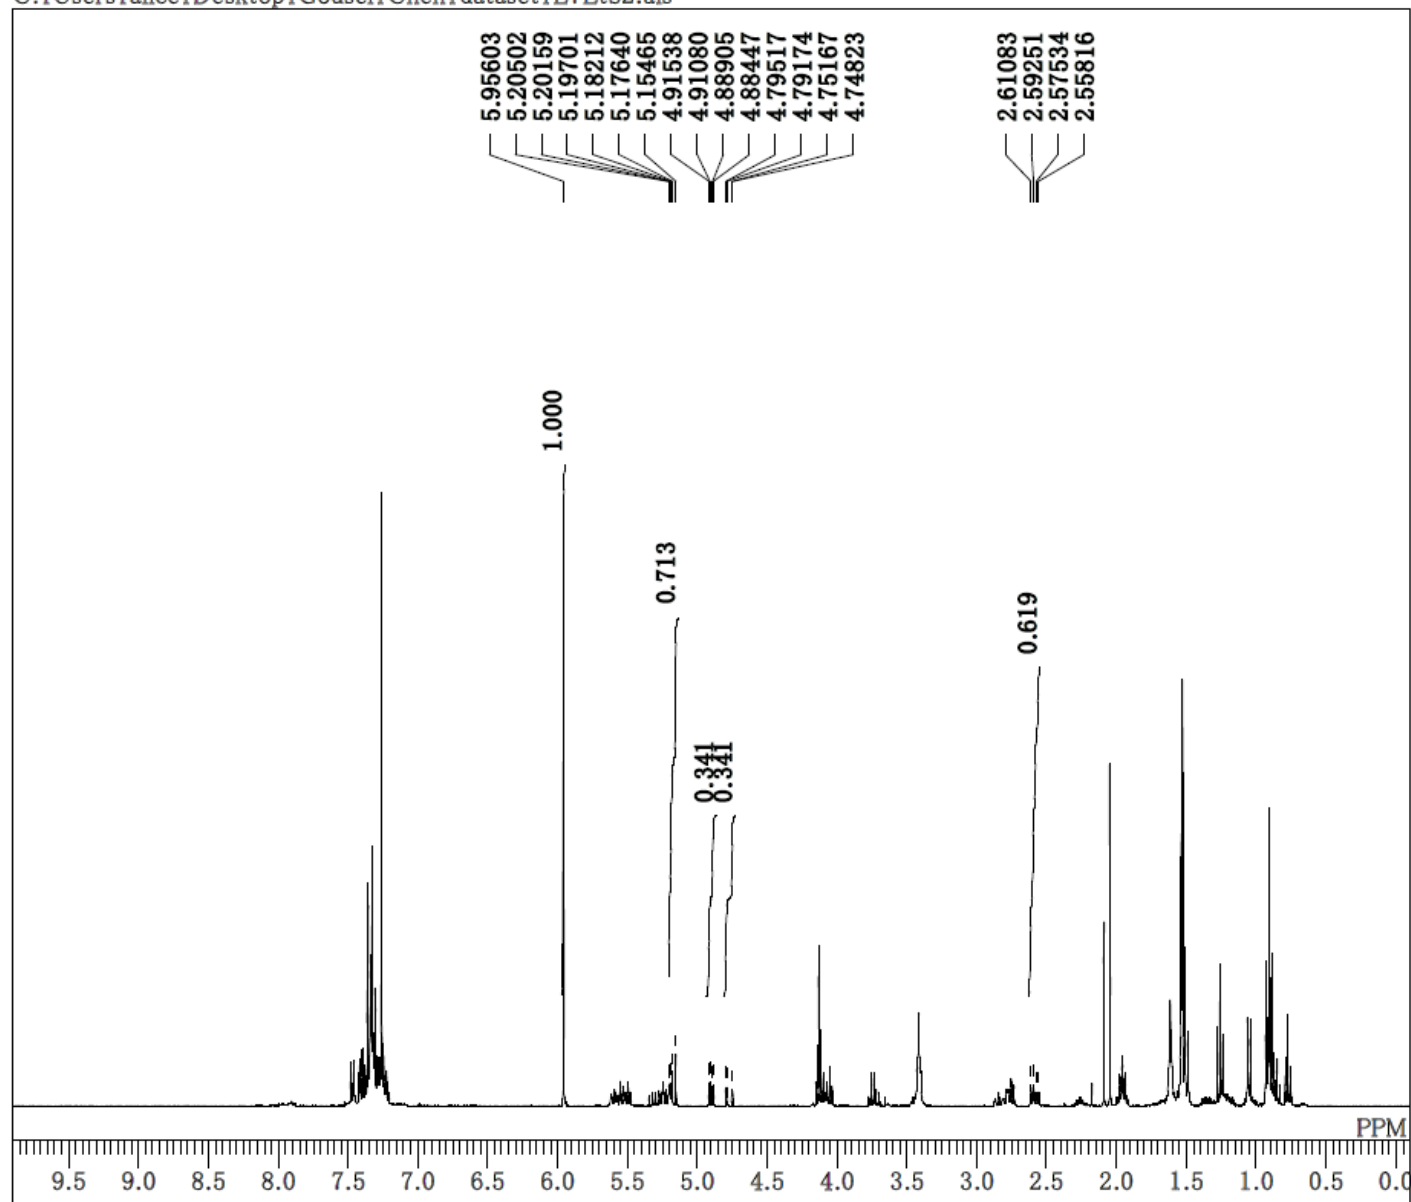

DFILE L7EtS2.als  
 COMNT  
 DATIM 29-08-2020 22:45:16  
 OBNUC 1H  
 EXMOD proton.jxp  
 OBFRQ 391.78 MHz  
 OBSET 8.51 KHz  
 OBFIN 3.34 Hz  
 POINT 13107  
 FREQU 5878.90 Hz  
 SCANS 8  
 ACQTM 2.2295 sec  
 PD 6.0000 sec  
 PW1 5.17 usec  
 IRNUC 1H  
 CTEMP 20.3 c  
 SLVNT CDCL3  
 EXREF 7.26 ppm  
 BF 0.12 Hz  
 RGAIN 40

**L7/1Et, S**  
 (2<sup>nd</sup> trial)  
 83%, 1.0/1 dr, 1.1/1 b/l

C:\Users\alice\Desktop\Gousei\Chen\aaaaaaaaaaa\L7PrS1.als

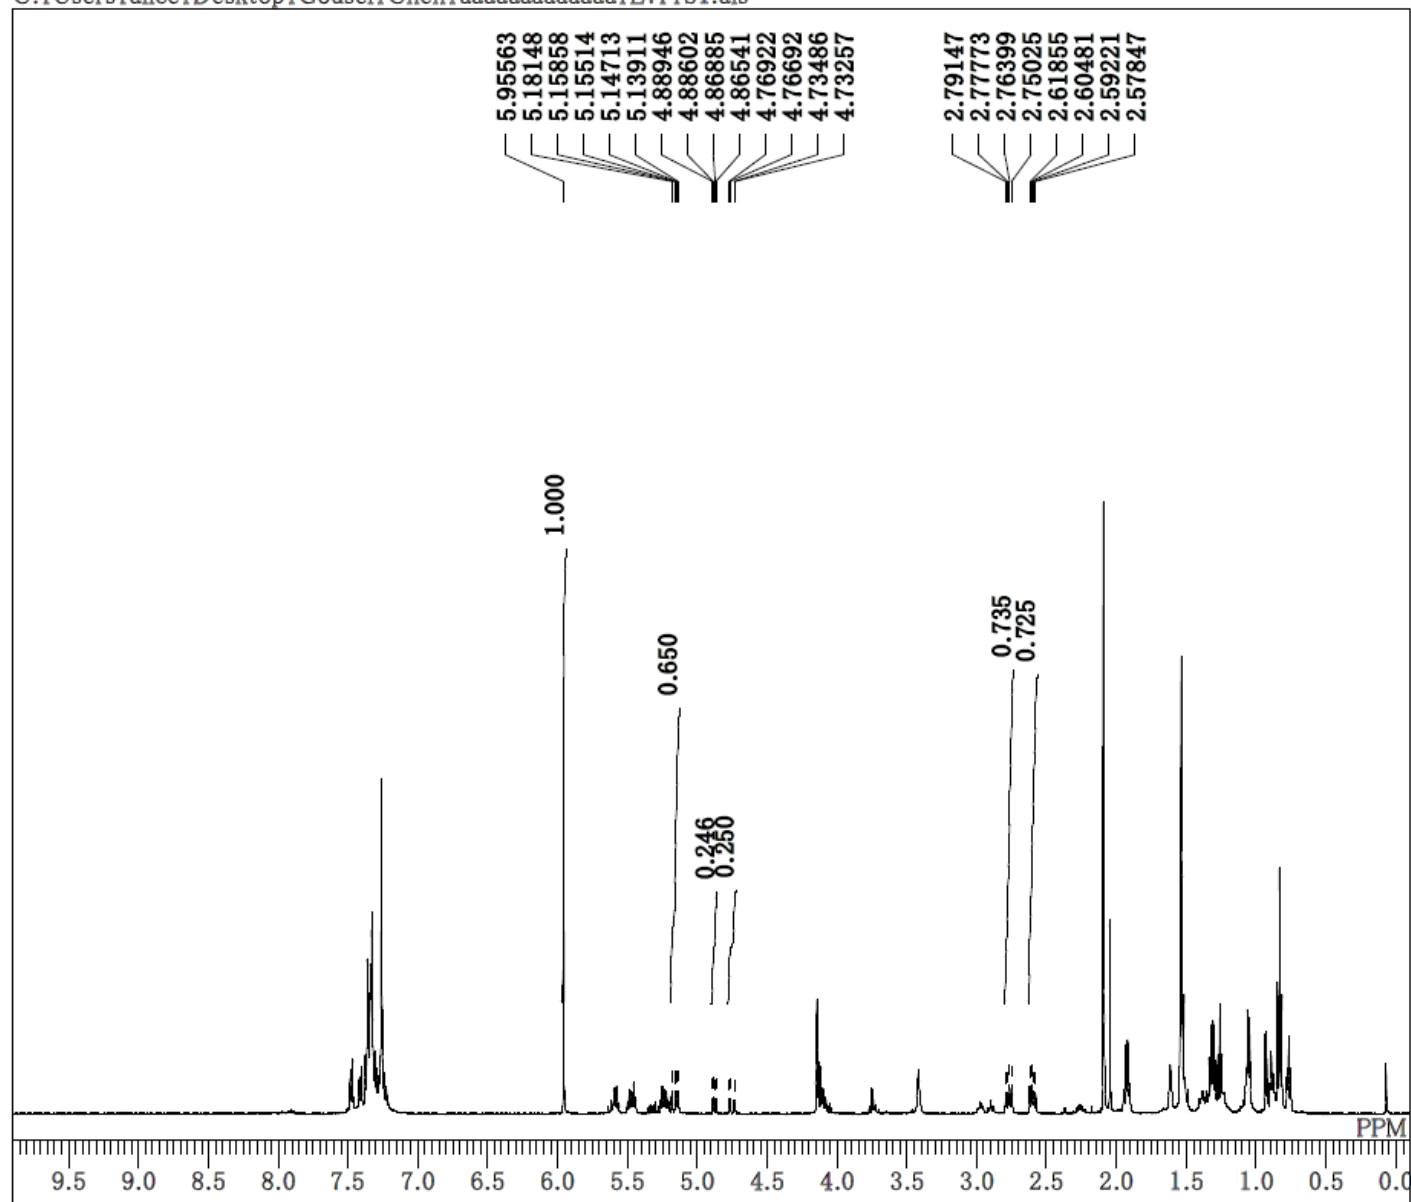

DFILE L7PrS1.als  
 COMNT  
 DATIM 2018-11-11 23:20:35  
 OBNUC 1H  
 EXMOD proton.jxp  
 OBFRQ 500.16 MHz  
 OBSET 2.41 KHz  
 OBFIN 6.01 Hz  
 POINT 16384  
 FREQU 9384.38 Hz  
 SCANS 8  
 ACQTM 1.7459 sec  
 PD 5.0000 sec  
 PW1 5.55 usec  
 IRNUC 1H  
 CTEMP 21.7 c  
 SLVNT CDCL3  
 EXREF 7.26 ppm  
 BF 0.12 Hz  
 RGAIN 32

**L7/1Pr, S**

(1<sup>st</sup> trial)

83%, 1.4/1 dr, 1/1.2 b/l

C:\Users\Valice\Desktop\Gousei\Chen\dataset\L7PrS2.als

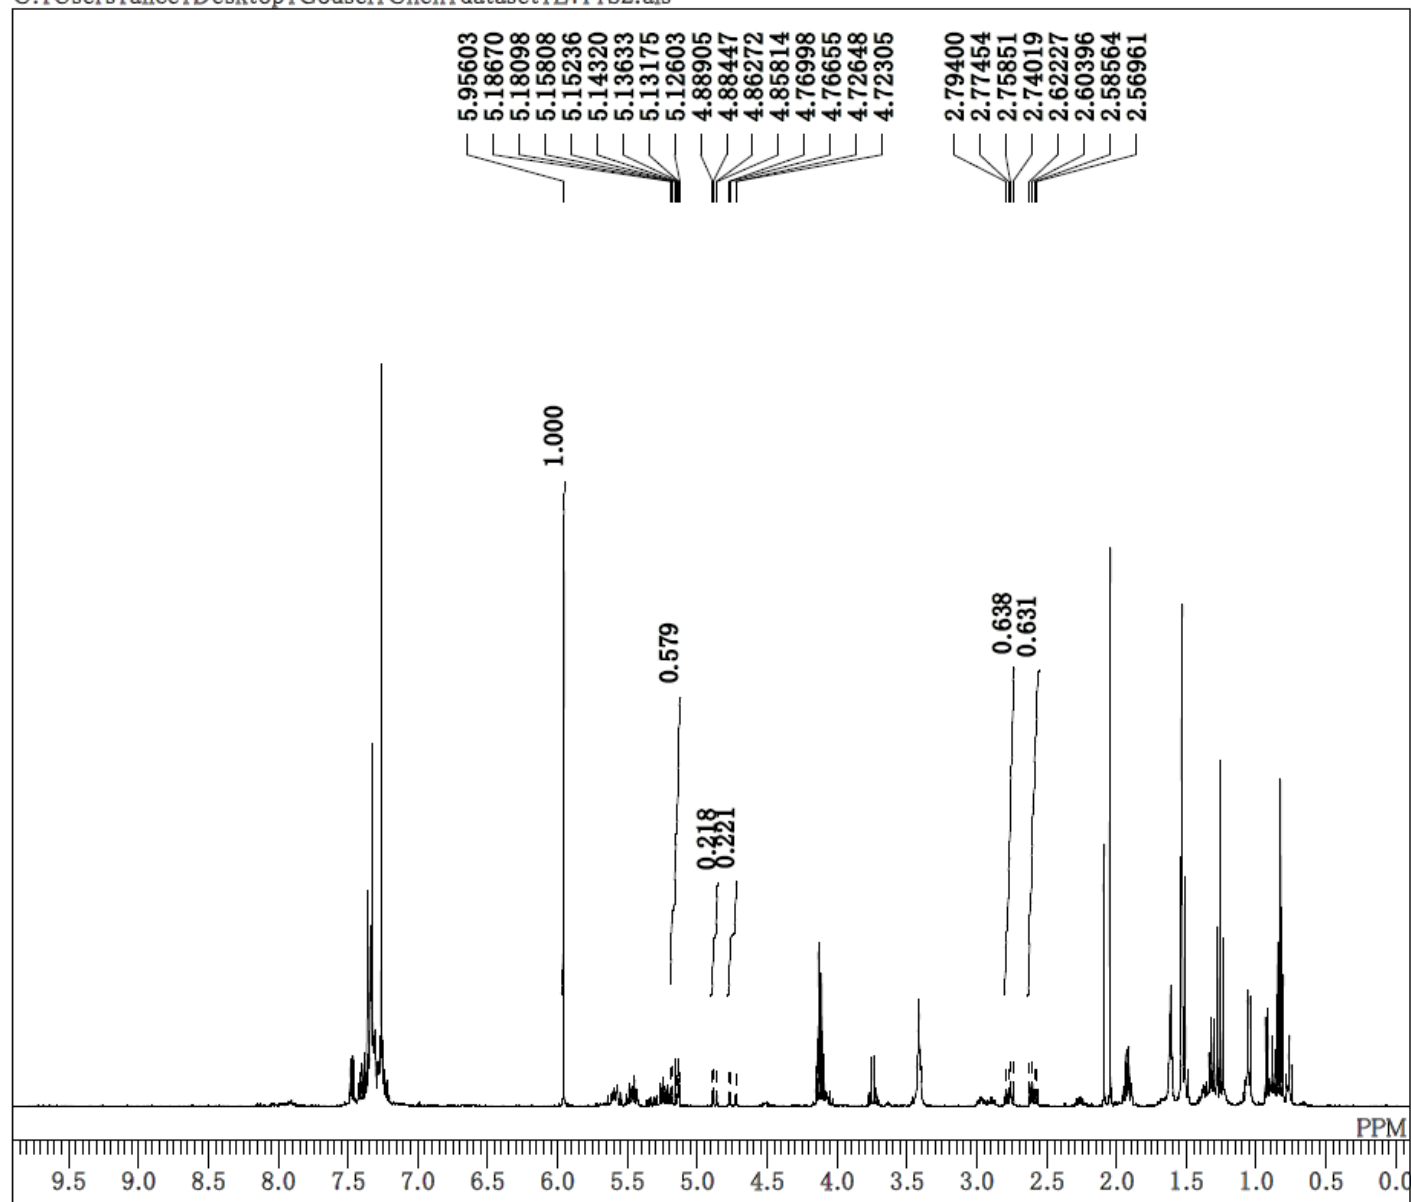

DFILE L7PrS2.als  
 COMNT  
 DATIM 29-08-2020 22:52:48  
 OBNUC 1H  
 EXMOD proton.jxp  
 OBFRQ 391.78 MHz  
 OBSET 8.51 KHz  
 OBFIN 3.34 Hz  
 POINT 13107  
 FREQU 5878.90 Hz  
 SCANS 8  
 ACQTM 2.2295 sec  
 PD 6.0000 sec  
 PW1 5.17 usec  
 IRNUC 1H  
 CTEMP 20.5 c  
 SLVNT CDCL3  
 EXREF 7.26 ppm  
 BF 0.12 Hz  
 RGAIN 40

**L7/1Pr, S**

(2<sup>nd</sup> trial)

72%, 1.3/1 dr, 1/1.2 b/l

C:\Users\Valice\Desktop\Gousei\Chen\dataset\L8EtS1.als

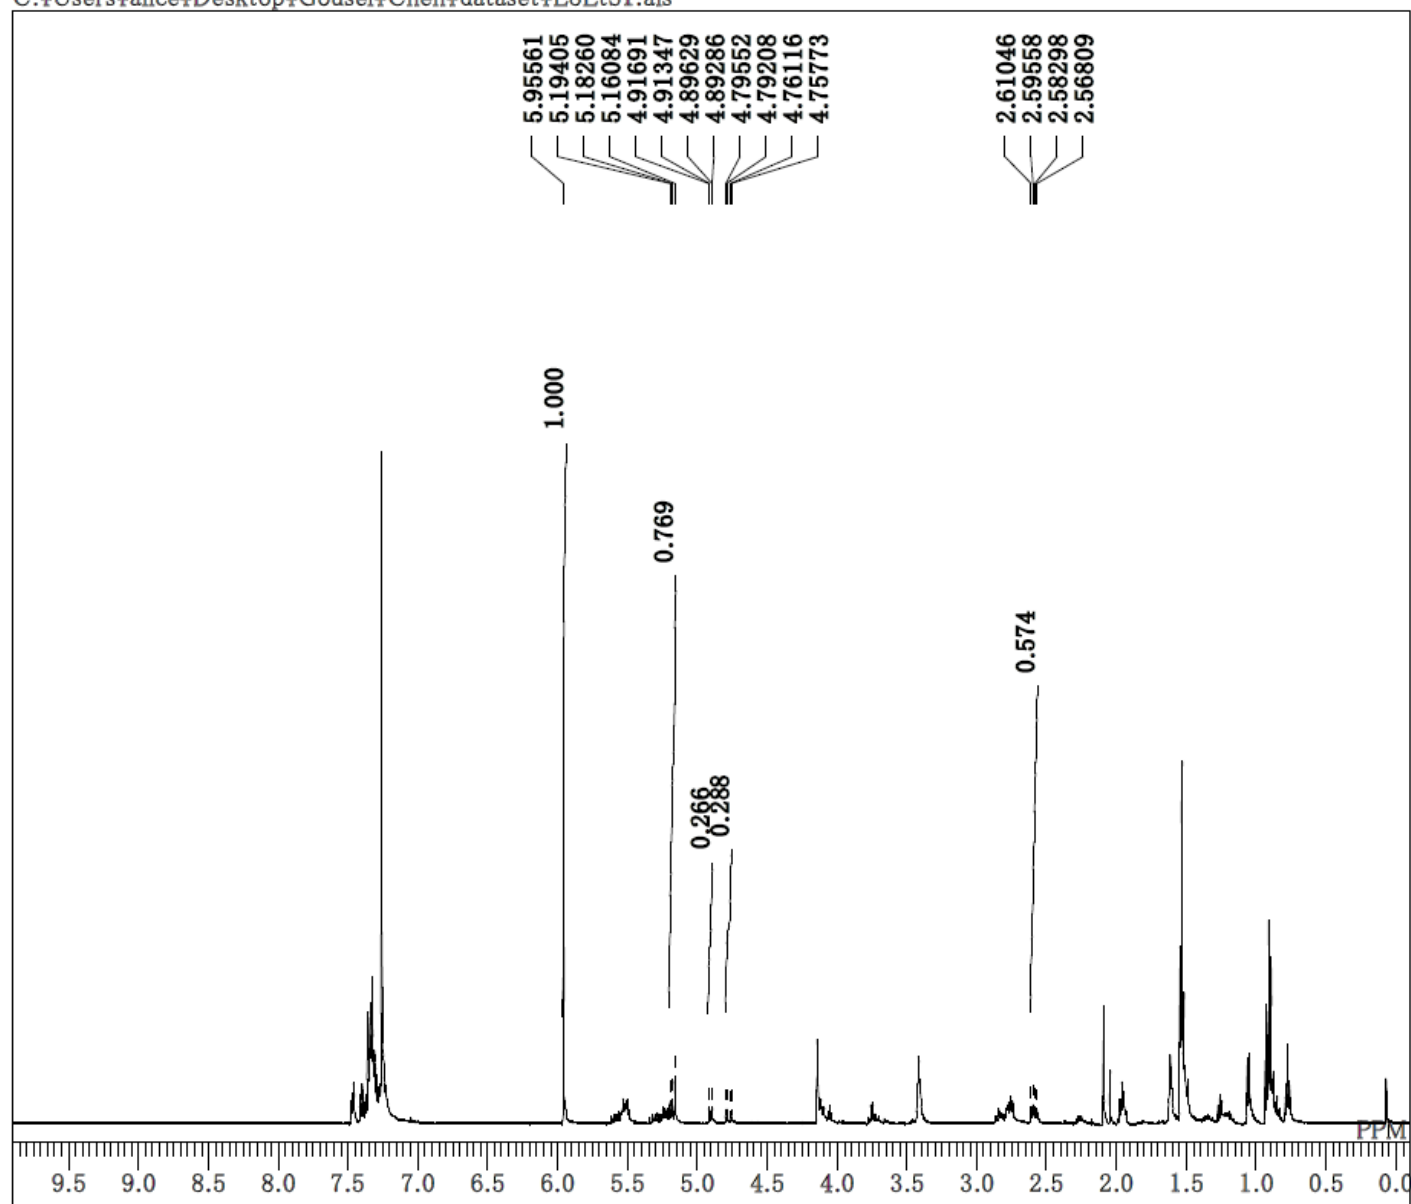

DFILE L8EtS1.als  
COMNT  
DATIM 2018-11-23 13:25:48  
OBNUC 1H  
EXMOD proton.jxp  
OBFRQ 500.16 MHz  
OBSET 2.41 KHz  
OBFIN 6.01 Hz  
POINT 13107  
FREQU 7507.51 Hz  
SCANS 8  
ACQTM 1.7459 sec  
PD 5.0000 sec  
PW1 5.55 usec  
IRNUC 1H  
CTEMP 22.1 c  
SLVNT CDCL3  
EXREF 7.26 ppm  
BF 0.12 Hz  
RGAIN 32

**L8/1Et, S**

(1<sup>st</sup> trial)

78%, 1.4/1 dr, 1.2/1 b/l



C:\Users\Valice\Desktop\Gousei\Chen\dataset\L8EtS2.als

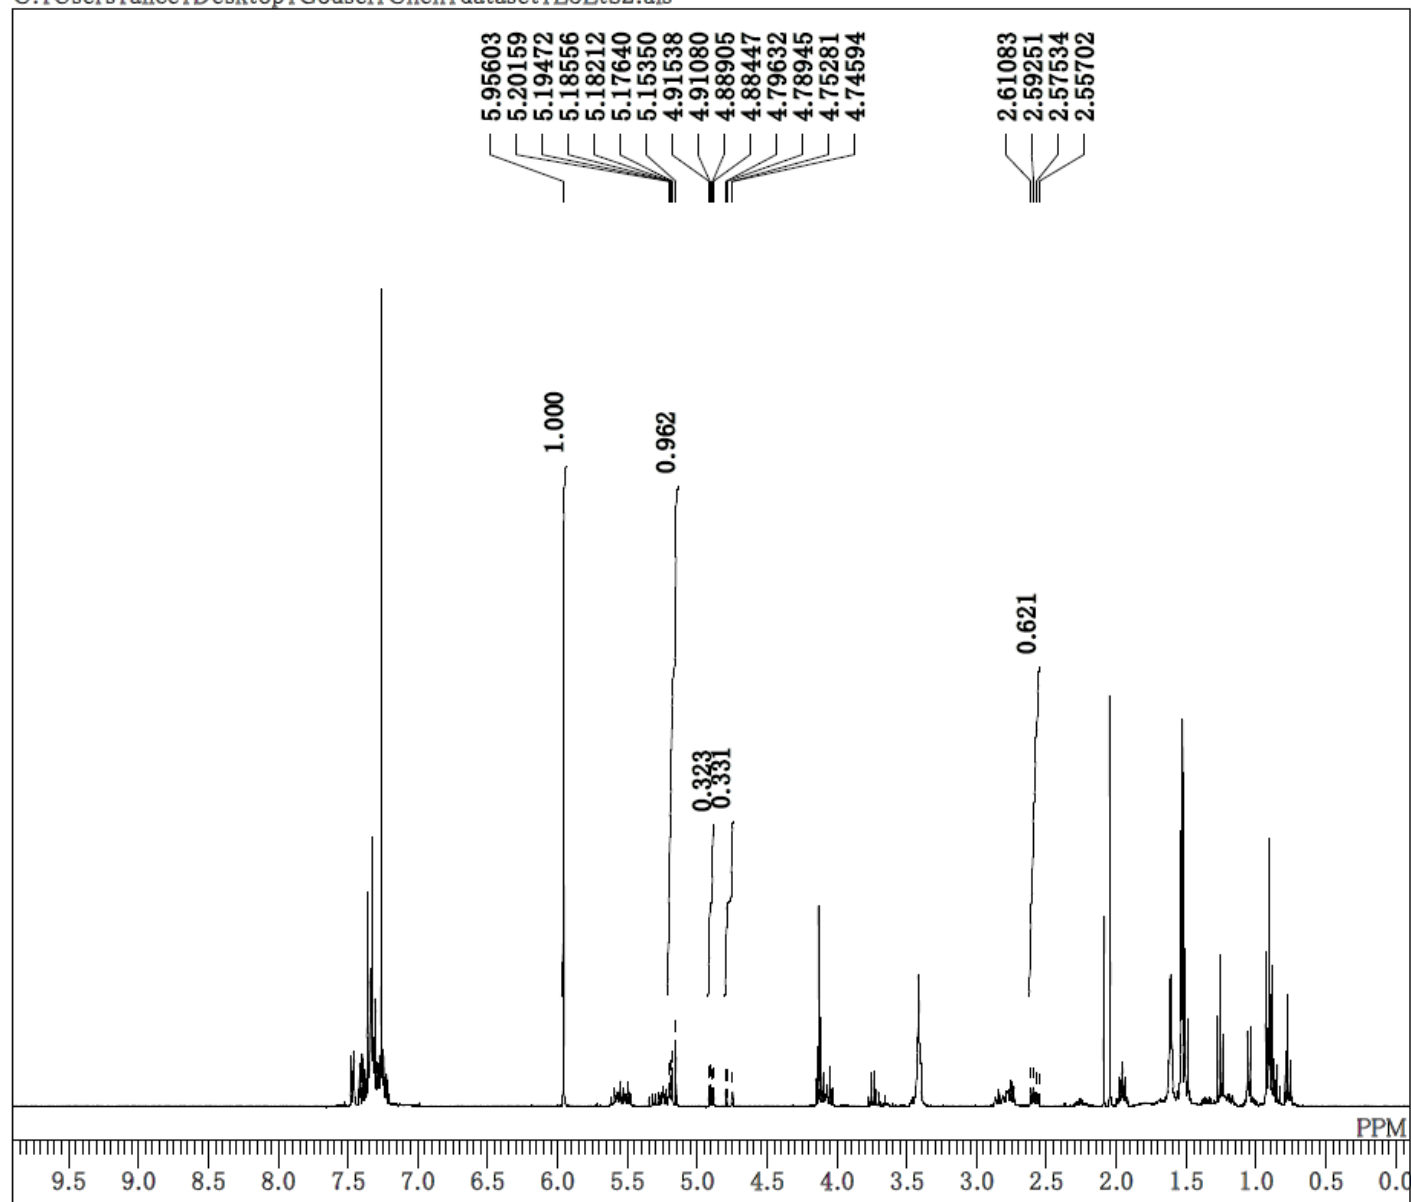

DFILE L8EtS2.als  
 COMNT  
 DATIM 23-08-2020 22:21:26  
 OBNUC 1H  
 EXMOD proton.jxp  
 OBFRQ 391.78 MHz  
 OBSET 8.51 KHz  
 OBFIN 3.34 Hz  
 POINT 13107  
 FREQU 5878.90 Hz  
 SCANS 8  
 ACQTM 2.2295 sec  
 PD 6.0000 sec  
 PW1 5.17 usec  
 IRNUC 1H  
 CTEMP 20.3 c  
 SLVNT CDCL3  
 EXREF 7.26 ppm  
 BF 0.12 Hz  
 RGAIN 42

**L8/1Et, S**

(2<sup>nd</sup> trial)

90%, 1.5/1 dr, 1.3/1 b/l

C:\Users\Valice\Desktop\Gousei\Chen\dataset\L8PrS1.als

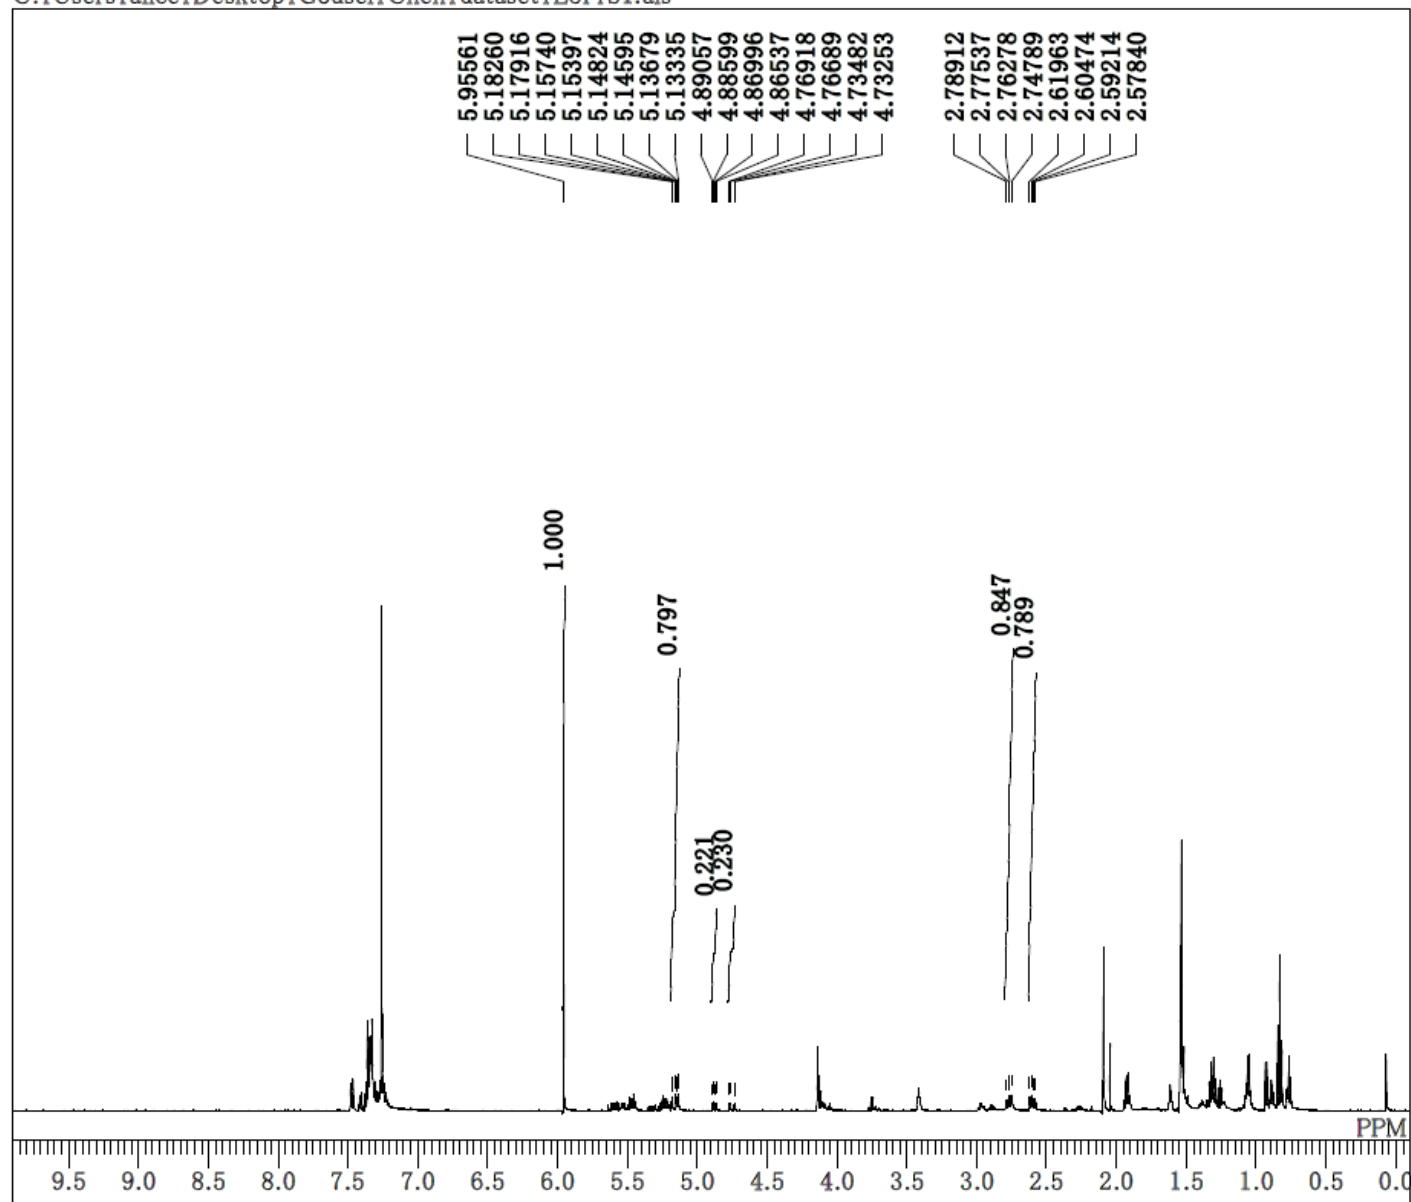

DFILE L8PrS1.als  
 COMNT  
 DATIM 2018-11-21 16:15:41  
 OBNUC 1H  
 EXMOD proton.jxp  
 OBFRQ 500.16 MHz  
 OBSET 2.41 KHz  
 OBFIN 6.01 Hz  
 POINT 13107  
 FREQU 7507.51 Hz  
 SCANS 8  
 ACQTM 1.7459 sec  
 PD 5.0000 sec  
 PW1 5.55 usec  
 IRNUC 1H  
 CTEMP 22.0 c  
 SLVNT CDCL3  
 EXREF 7.26 ppm  
 BF 0.12 Hz  
 RGAIN 32

**L8/1Pr, S**

(1<sup>st</sup> trial)

91%, 1.8/1 dr, 1/1.3 b/l

C:\Users\Valice\Desktop\Gousei\Chen\dataset\L8PrS2.als

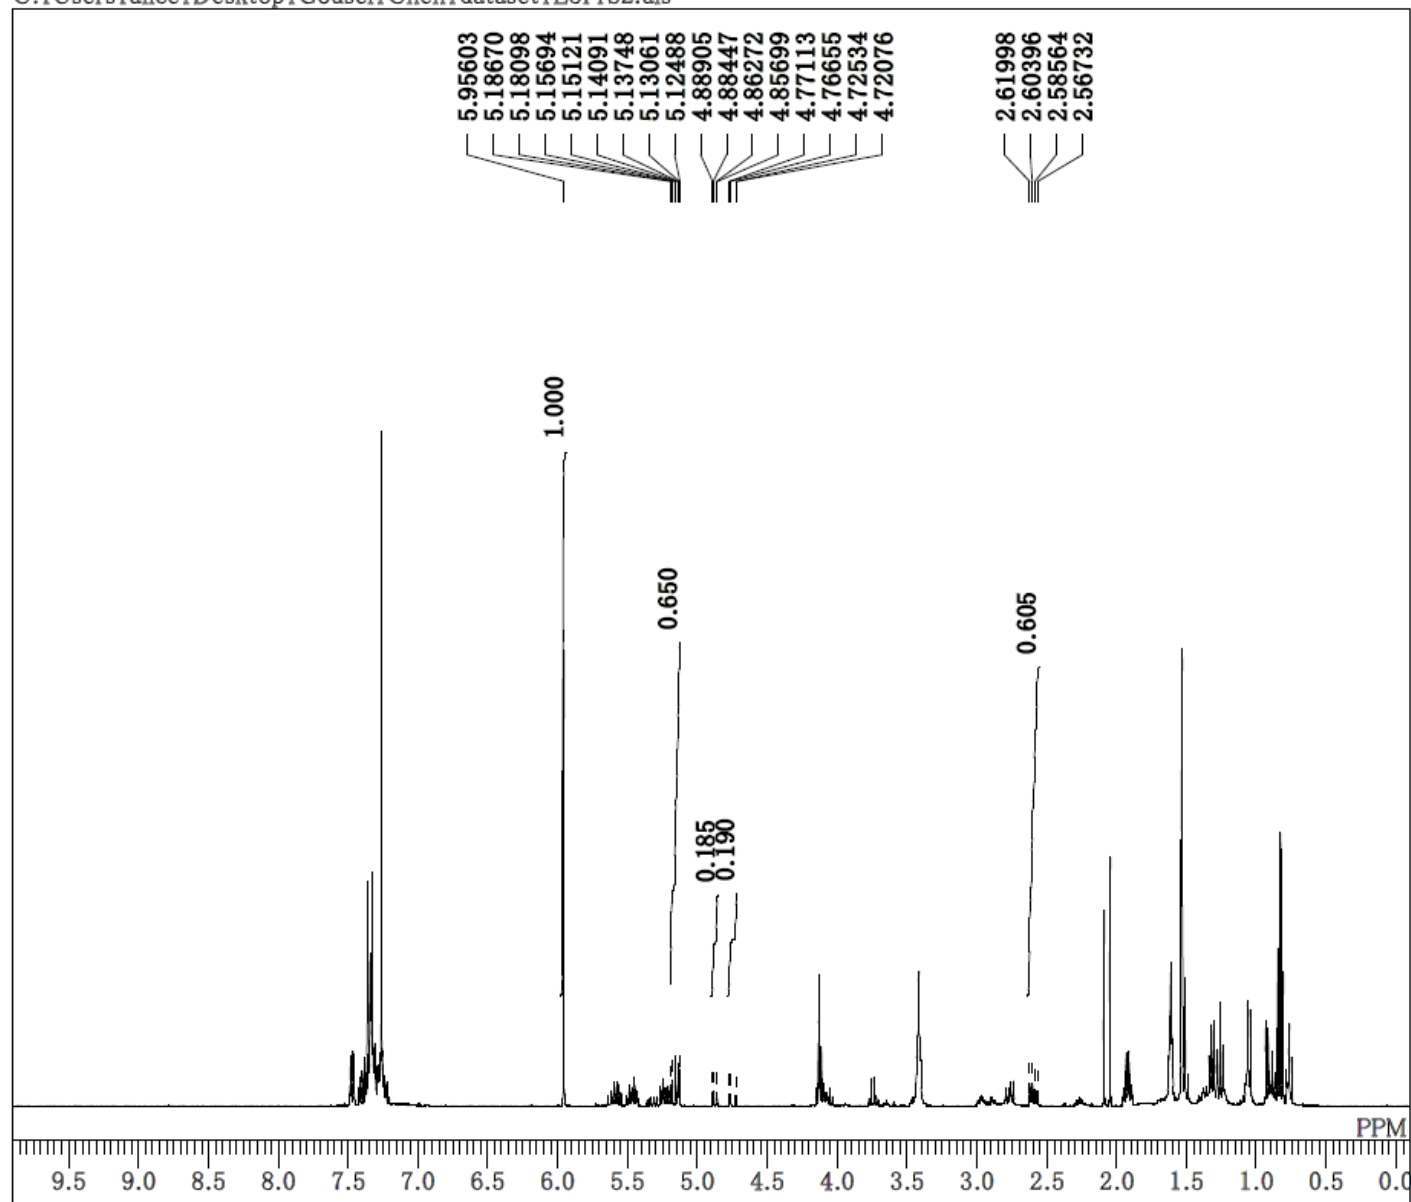

DFILE L8PrS2.als  
 COMNT  
 DATIM 23-08-2020 22:32:38  
 OBNUC 1H  
 EXMOD proton.jxp  
 OBFRQ 391.78 MHz  
 OBSET 8.51 KHz  
 OBFIN 3.34 Hz  
 POINT 13107  
 FREQU 5878.90 Hz  
 SCANS 8  
 ACQTM 2.2295 sec  
 PD 6.0000 sec  
 PW1 5.17 usec  
 IRNUC 1H  
 CTEMP 20.2 c  
 SLVNT CDCL3  
 EXREF 7.26 ppm  
 BF 0.12 Hz  
 RGAIN 40

**L8/1Pr, S**

(2<sup>nd</sup> trial)

70%, 1.7/1 dr, 1/1.2 b/l

C:\Users\Valice\Desktop\Gousei\Chen\dataset\L9EtS1.als

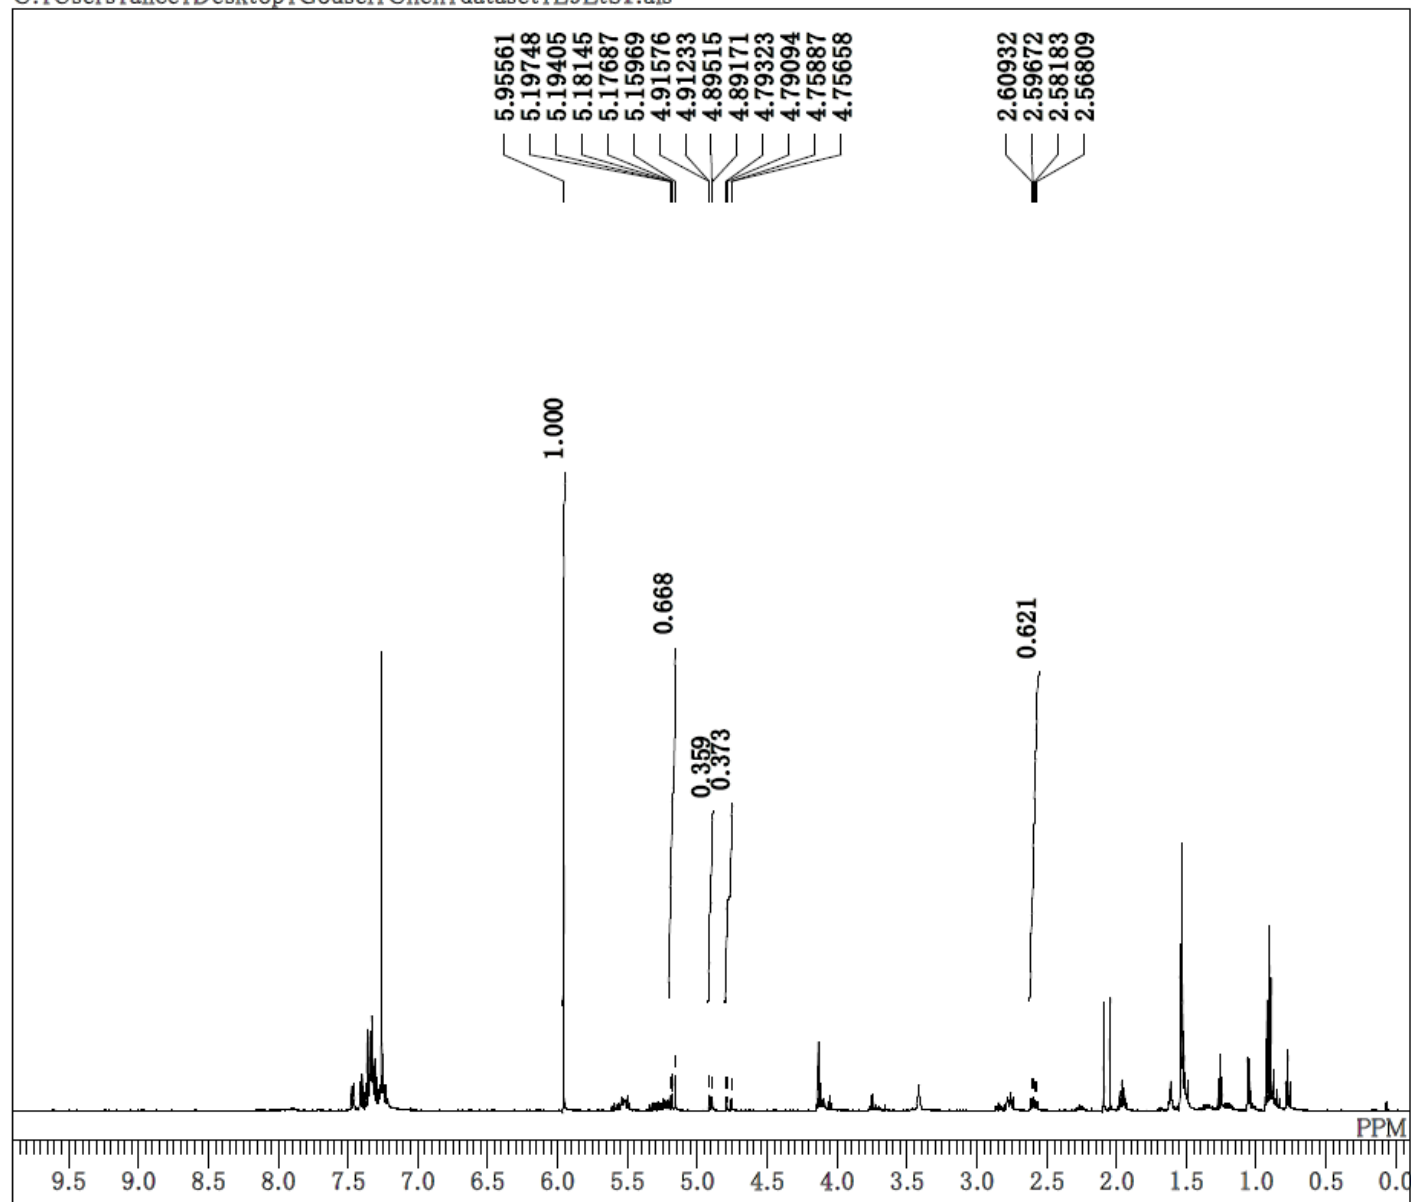

DFILE L9EtS1.als  
COMNT  
DATIM 2018-12-06 14:28:41  
OBNUC 1H  
EXMOD proton.jxp  
OBFRQ 500.16 MHz  
OBSET 2.41 KHz  
OBFIN 6.01 Hz  
POINT 13107  
FREQU 7507.51 Hz  
SCANS 8  
ACQTM 1.7459 sec  
PD 5.0000 sec  
PW1 5.55 usec  
IRNUC 1H  
CTEMP 21.7 c  
SLVNT CDCL3  
EXREF 7.26 ppm  
BF 0.12 Hz  
RGAIN 32

**L9/1Et, S**

(1<sup>st</sup> trial)

83%, 1/1.1 dr, 1.1/1 b/l

C:\Users\Valice\Desktop\Gousei\Chen\dataset\L9EtS2.als

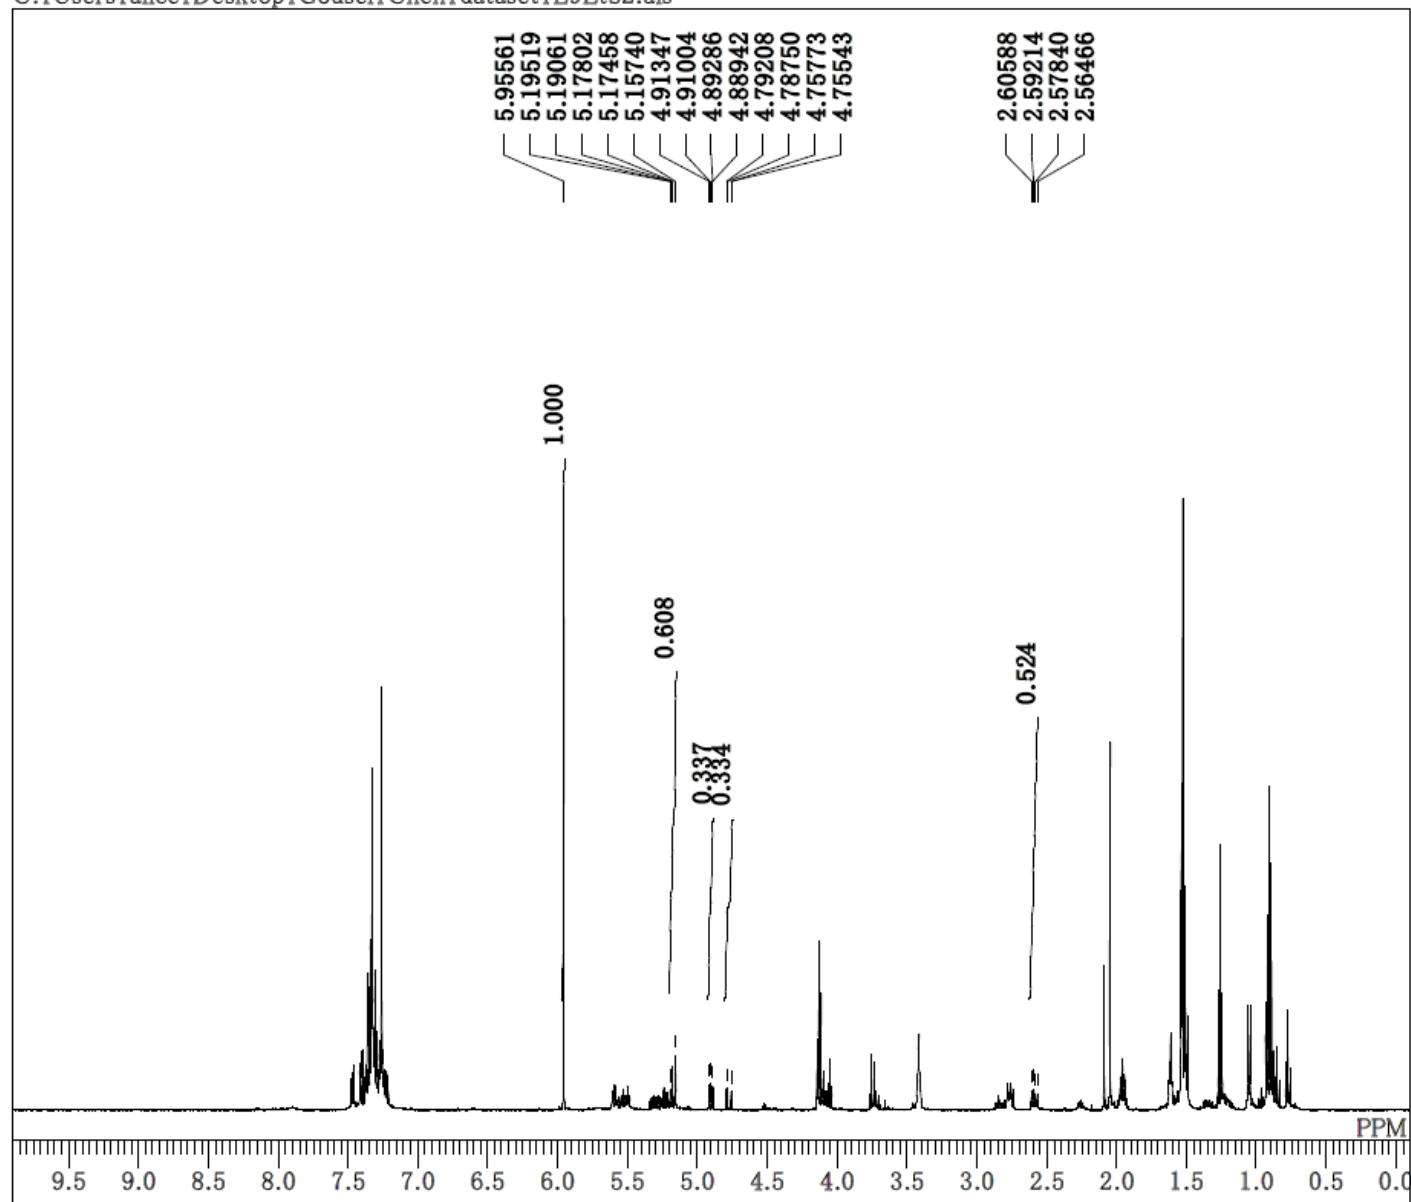

DFILE L9EtS2.als  
COMNT  
DATIM 2020-09-01 19:07:10  
OBNUC 1H  
EXMOD proton.jxp  
OBFRQ 500.16 MHz  
OBSET 2.41 KHz  
OBFIN 6.01 Hz  
POINT 13107  
FREQU 7507.51 Hz  
SCANS 8  
ACQTM 1.7459 sec  
PD 6.0000 sec  
PW1 5.55 usec  
IRNUC 1H  
CTEMP 22.0 c  
SLVNT CDCL3  
EXREF 7.26 ppm  
BF 0.12 Hz  
RGAIN 42

**L9/1Et, S**

(2<sup>nd</sup> trial)

73%, 1/1.1 dr, 1.2/1 b/l

C:\Users\Valice\Desktop\Gousei\Chen\dataset\L9PrS1.als

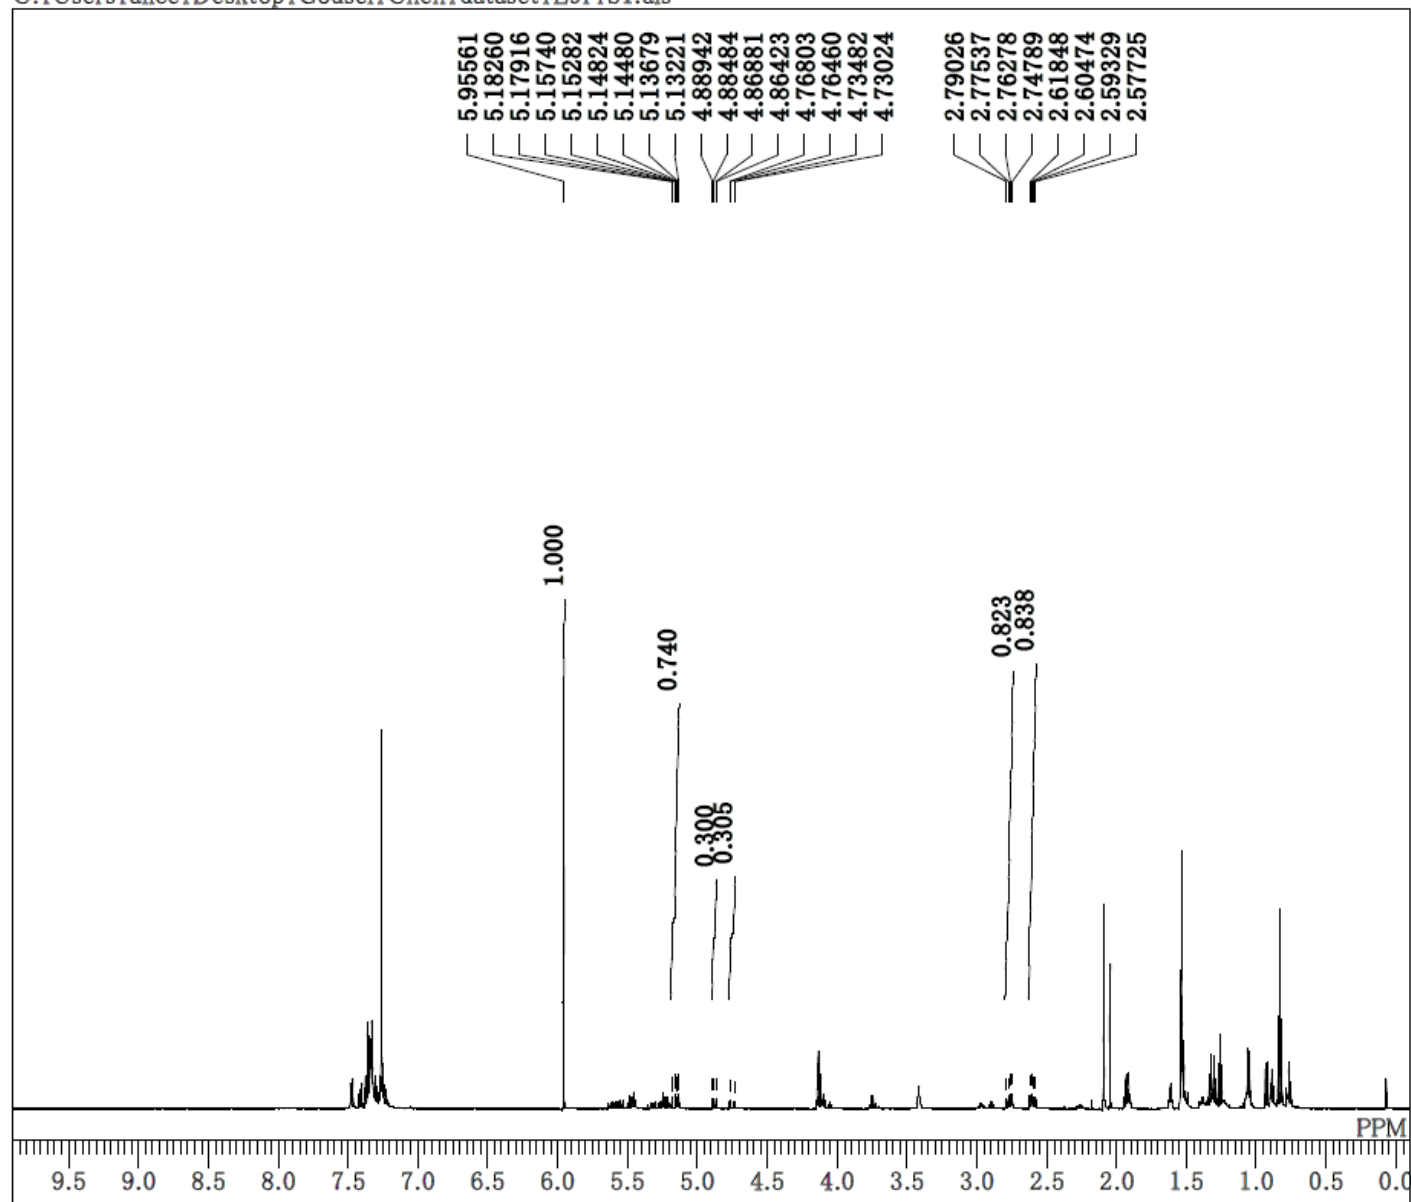

DFILE L9PrS1.als  
COMNT  
DATIM 2018-12-06 14:42:08  
OBNUC 1H  
EXMOD proton.jxp  
OBFRQ 500.16 MHz  
OBSET 2.41 KHz  
OBFIN 6.01 Hz  
POINT 13107  
FREQU 7507.51 Hz  
SCANS 8  
ACQTM 1.7459 sec  
PD 5.0000 sec  
PW1 5.55 usec  
IRNUC 1H  
CTEMP 21.9 c  
SLVNT CDCL3  
EXREF 7.26 ppm  
BF 0.12 Hz  
RGAIN 32

**L9/1Pr, S**

(1<sup>st</sup> trial)

95%, 1.2/1 dr, 1/1.2 b/l

C:\Users\Valice\Desktop\Gousei\Chen\dataset\L9PrS2.als

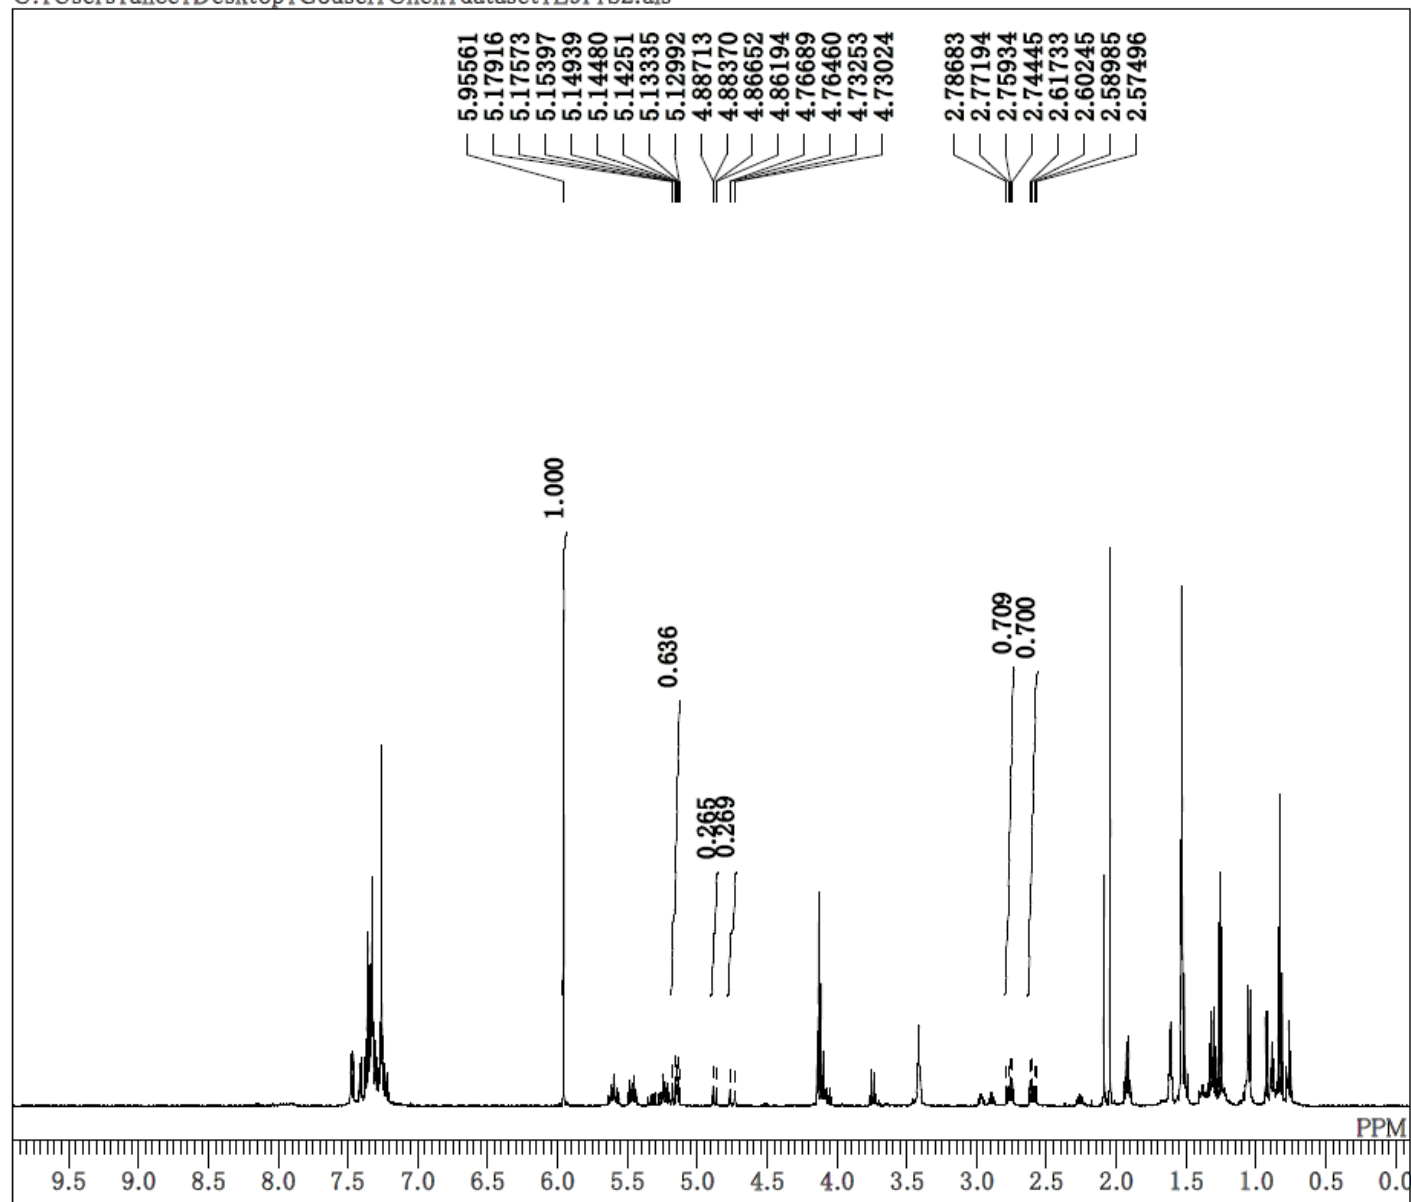

DFILE L9PrS2.als  
 COMNT  
 DATIM 2020-09-01 19:14:20  
 OBNUC 1H  
 EXMOD proton.jxp  
 OBFRQ 500.16 MHz  
 OBSET 2.41 KHz  
 OBFIN 6.01 Hz  
 POINT 13107  
 FREQU 7507.51 Hz  
 SCANS 8  
 ACQTM 1.7459 sec  
 PD 6.0000 sec  
 PW1 5.55 usec  
 IRNUC 1H  
 CTEMP 22.1 c  
 SLVNT CDCL3  
 EXREF 7.26 ppm  
 BF 0.12 Hz  
 RGAIN 42

**L9/1Pr, S**

(2<sup>nd</sup> trial)

81%, 1.2/1 dr, 1/1.2 b/l

C:\Users\Valice\Desktop\Gousei\Chen\dataset\L10EtS1.als

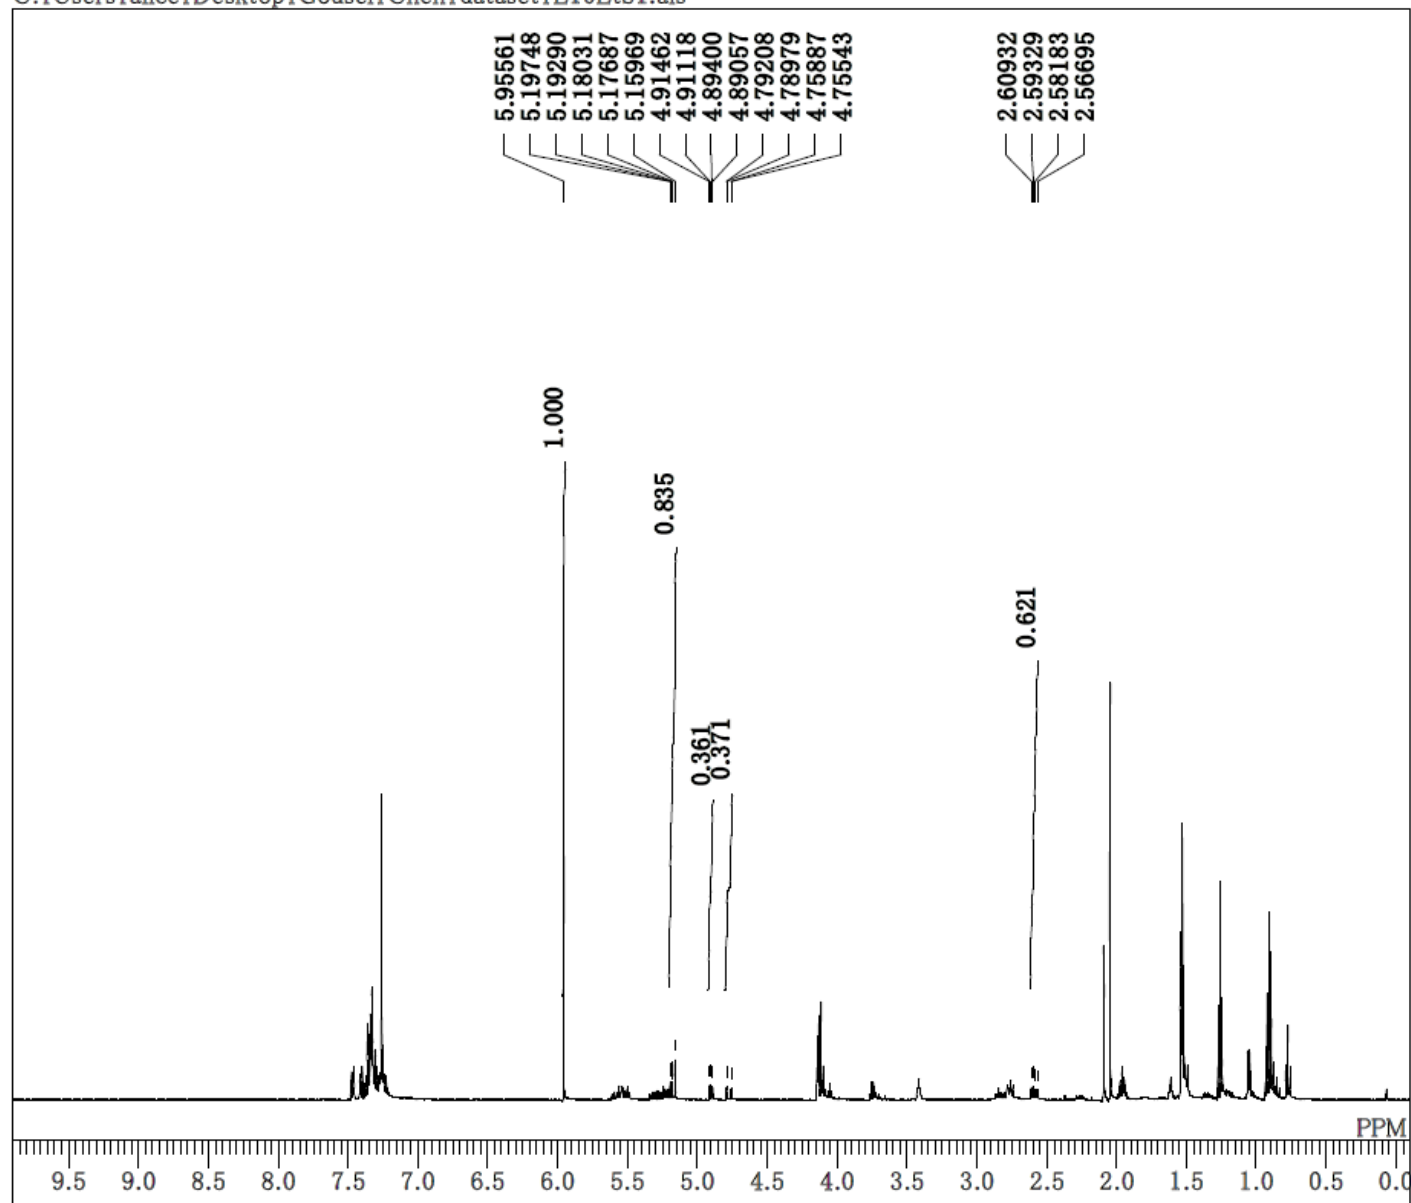

DFILE L10EtS1.als  
COMNT  
DATIM 2018-12-05 09:15:09  
OBNUC 1H  
EXMOD proton.jxp  
OBFRQ 500.16 MHz  
OBSET 2.41 KHz  
OBFIN 6.01 Hz  
POINT 13107  
FREQU 7507.51 Hz  
SCANS 8  
ACQTM 1.7459 sec  
PD 5.0000 sec  
PW1 5.55 usec  
IRNUC 1H  
CTEMP 21.5 c  
SLVNT CDCL3  
EXREF 7.26 ppm  
BF 0.12 Hz  
RGAIN 32

**L10/1Et, S**

(1<sup>st</sup> trial)

88%, 1.1/1 dr, 1.3/1 b/l



C:\Users\Valice\Desktop\Gousei\Chen\dataset\L10EtS2.als

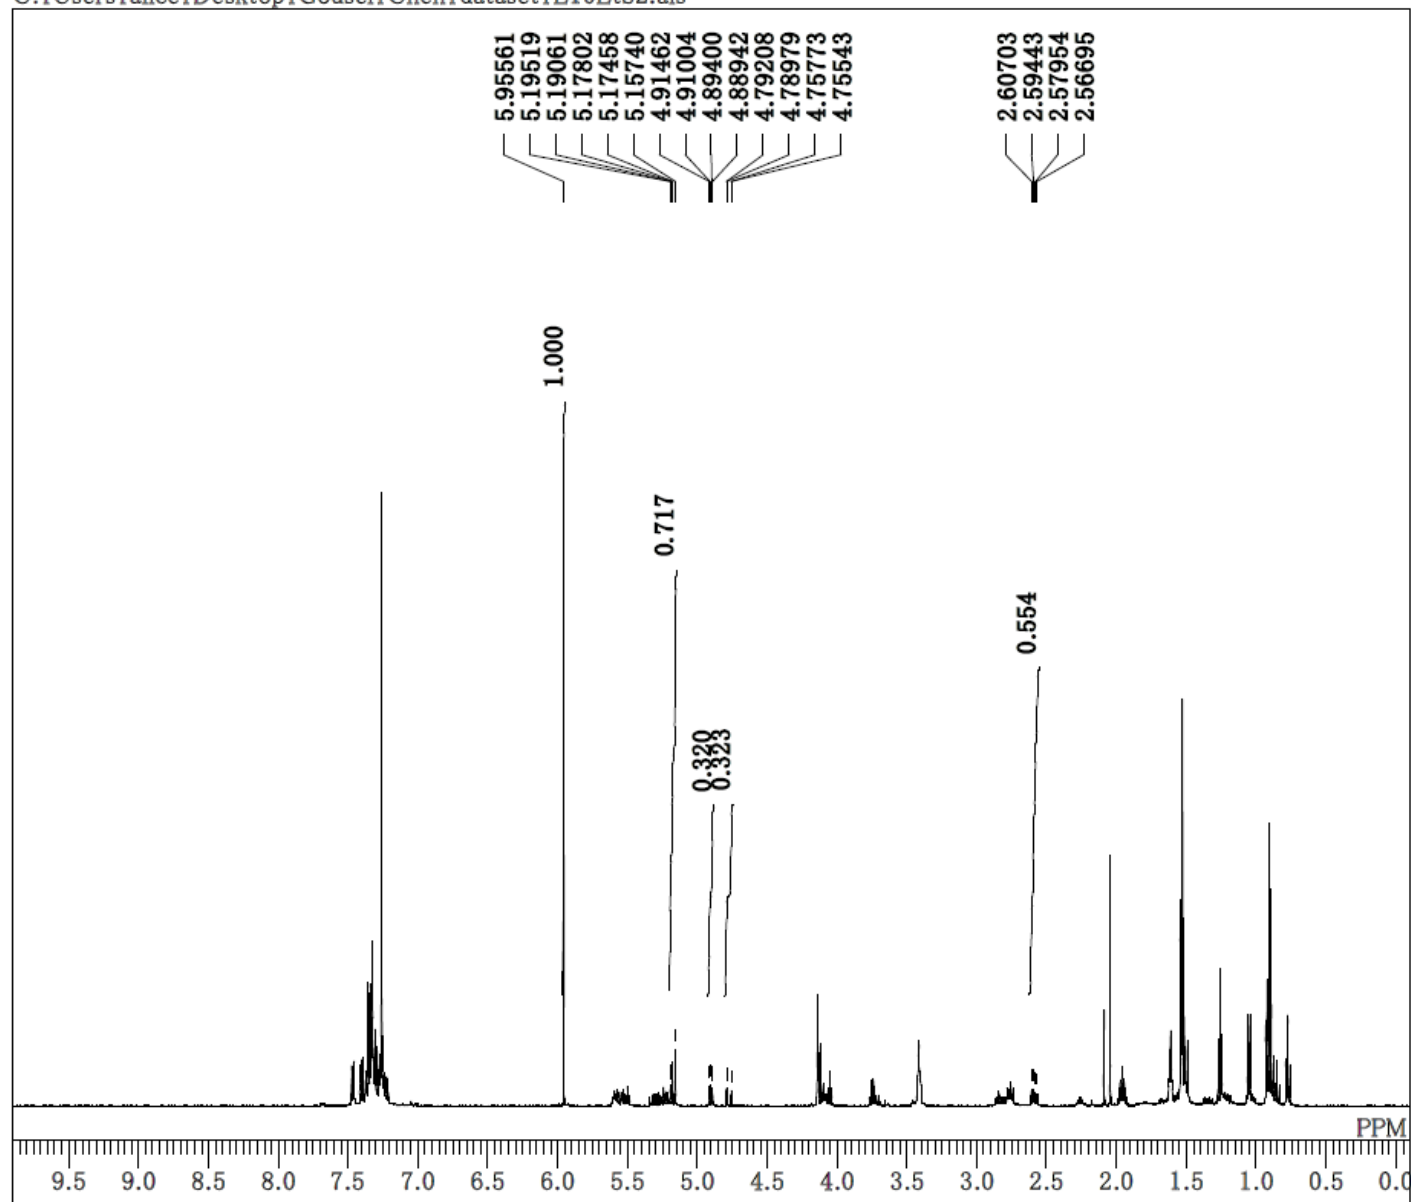

DFILE L10EtS2.als  
 COMNT  
 DATIM 2020-09-01 23:04:01  
 OBNUC 1H  
 EXMOD proton.jxp  
 OBFRQ 500.16 MHz  
 OBSET 2.41 KHz  
 OBFIN 6.01 Hz  
 POINT 13107  
 FREQU 7507.51 Hz  
 SCANS 8  
 ACQTM 1.7459 sec  
 PD 6.0000 sec  
 PW1 5.55 usec  
 IRNUC 1H  
 CTEMP 21.9 c  
 SLVNT CDCL3  
 EXREF 7.26 ppm  
 BF 0.12 Hz  
 RGAIN 42

**L10/1Et, S**

(2<sup>nd</sup> trial)

78%, 1.1/1 dr, 1.2/1 b/l

C:\Users\Valice\Desktop\Gousei\Chen\dataset\L10PrS1.als

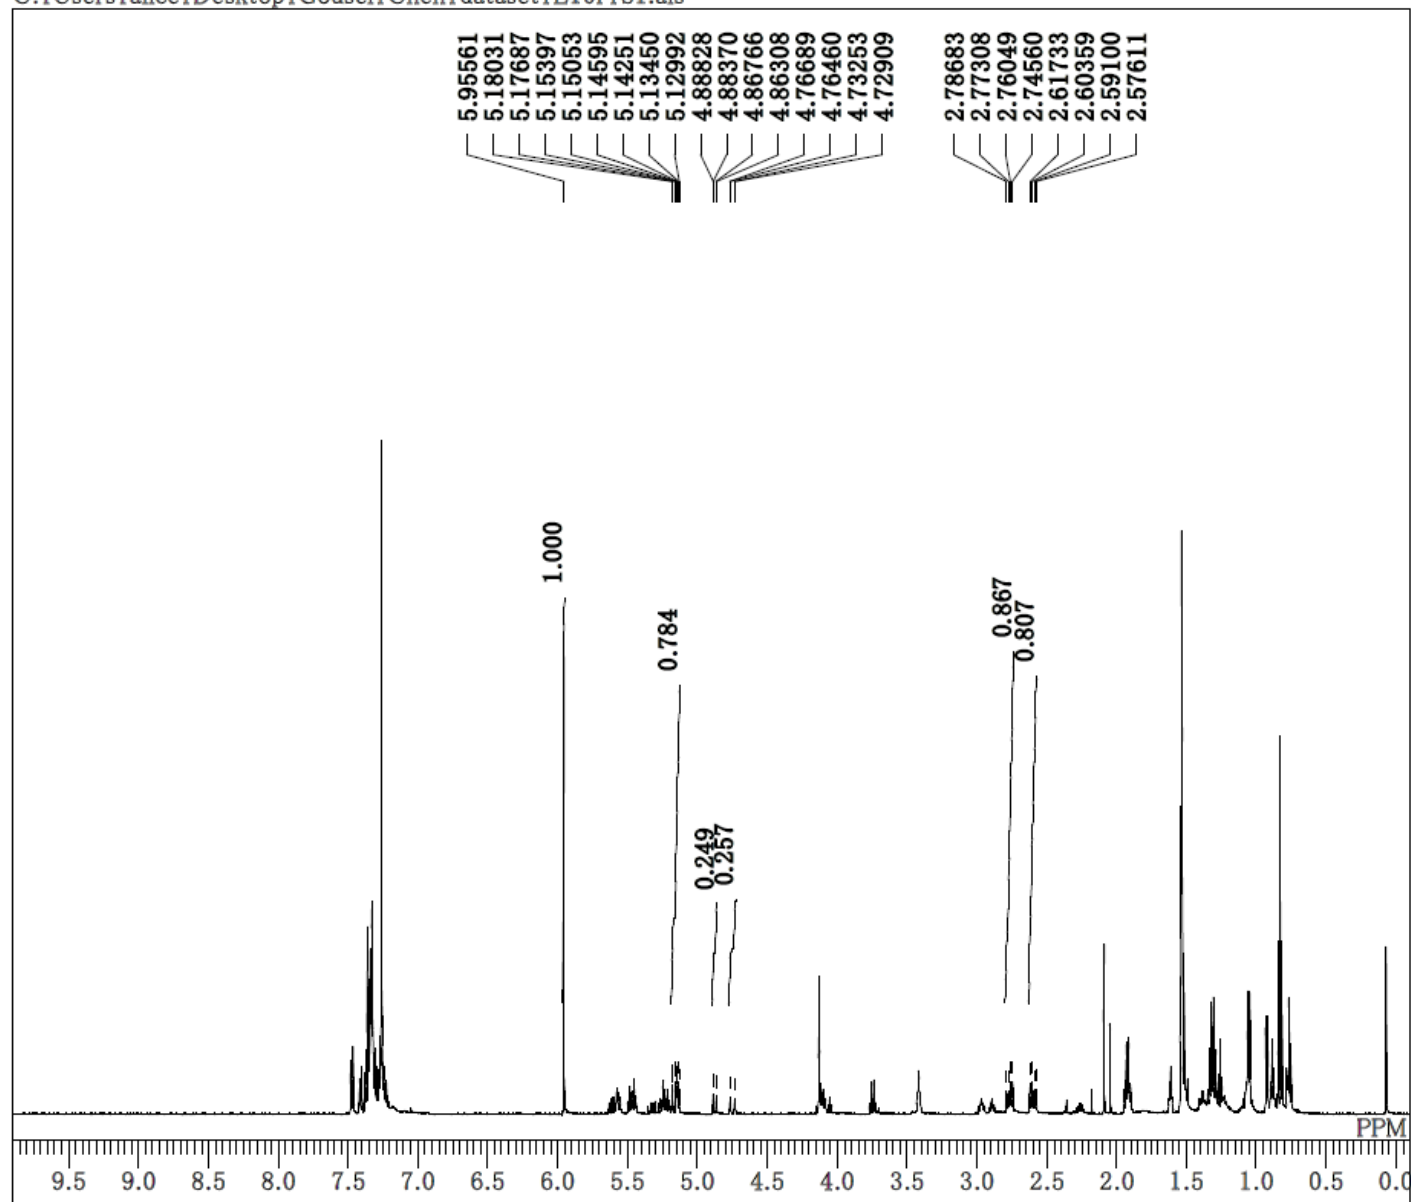

DFILE L10PrS1.als  
 COMNT  
 DATIM 2018-12-03 17:32:44  
 OBNUC 1H  
 EXMOD proton.jxp  
 OBFRQ 500.16 MHz  
 OBSET 2.41 KHz  
 OBFIN 6.01 Hz  
 POINT 13107  
 FREQU 7507.51 Hz  
 SCANS 8  
 ACQTM 1.7459 sec  
 PD 5.0000 sec  
 PW1 5.55 usec  
 IRNUC 1H  
 CTEMP 21.8 c  
 SLVNT CDCL3  
 EXREF 7.26 ppm  
 BF 0.12 Hz  
 RGAIN 32

**L10/1Pr, S**

(1<sup>st</sup> trial)

93%, 1.5/1 dr, 1/1.3 b/l

C:\Users\Valice\Desktop\Gousei\Chen\dataset\L10PrS2.als

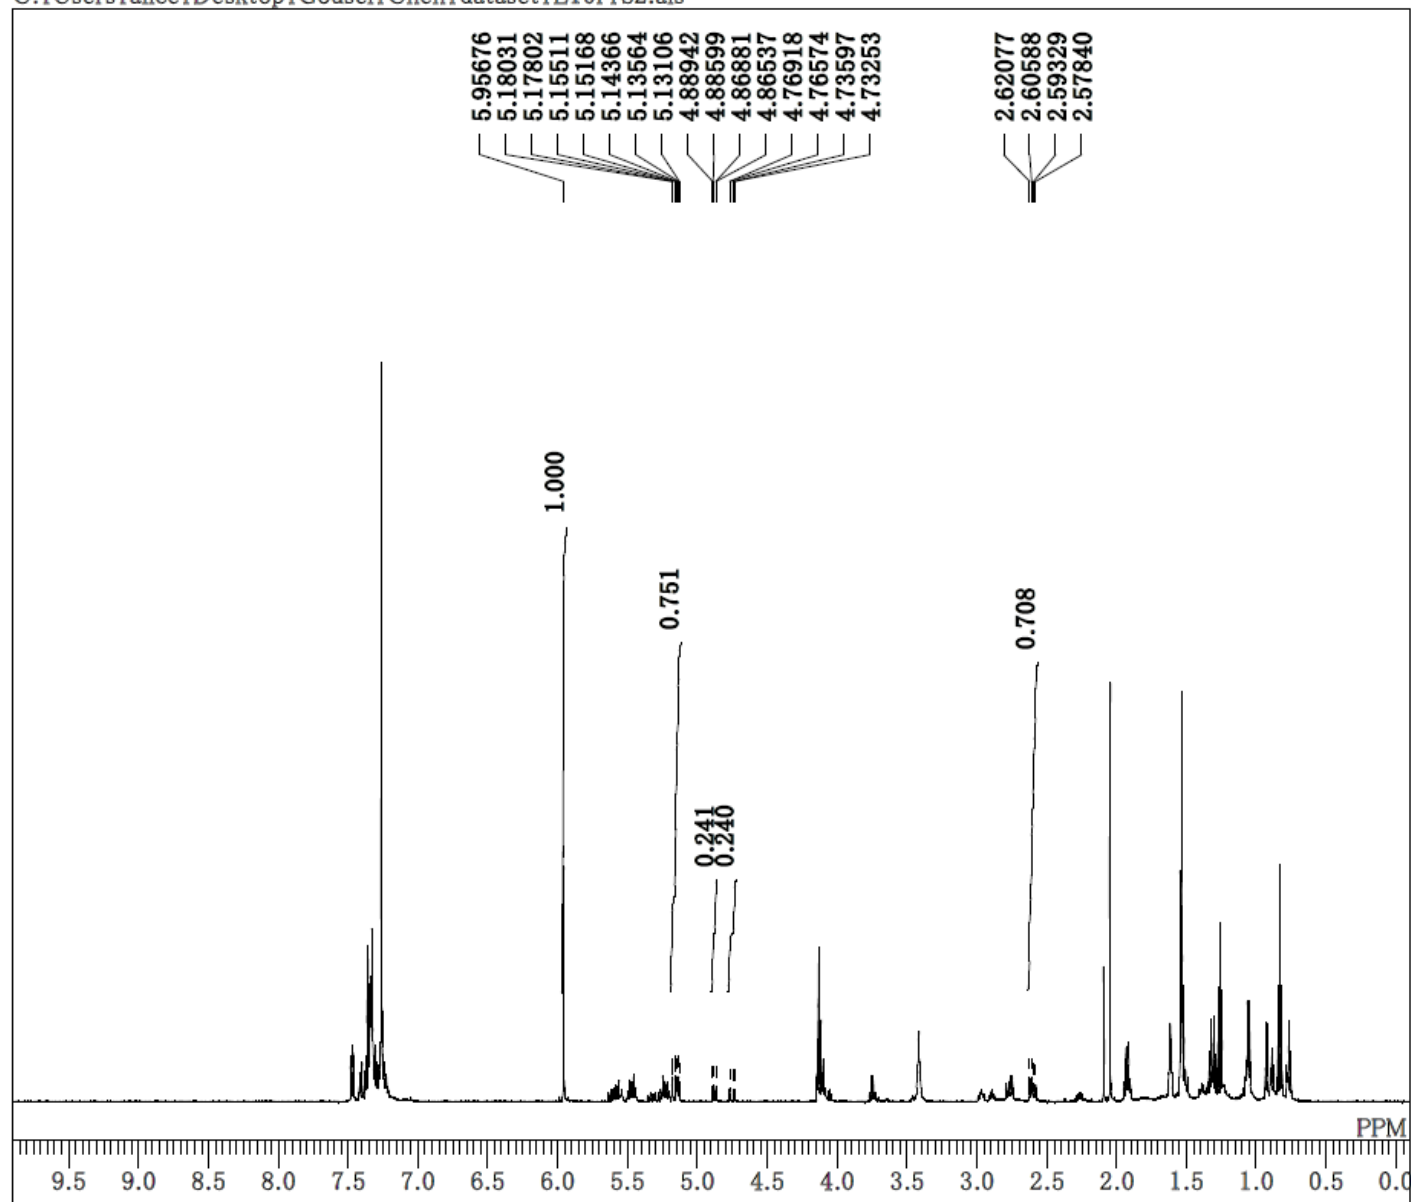

DFILE L10PrS2.als  
 COMNT  
 DATIM 2020-09-01 23:13:58  
 OBNUC 1H  
 EXMOD proton.jxp  
 OBFRQ 500.16 MHz  
 OBSET 2.41 KHz  
 OBFIN 6.01 Hz  
 POINT 13107  
 FREQU 7507.51 Hz  
 SCANS 8  
 ACQTM 1.7459 sec  
 PD 6.0000 sec  
 PW1 5.55 usec  
 IRNUC 1H  
 CTEMP 22.2 c  
 SLVNT CDCL3  
 EXREF 7.26 ppm  
 BF 0.12 Hz  
 RGAIN 42

**L10/1Pr, S**

(2<sup>nd</sup> trial)

83%, 1.6/1 dr, 1/1.1 b/l

C:\Users\Valice\Desktop\Gousei\Chen\dataset\L11EtS1.als

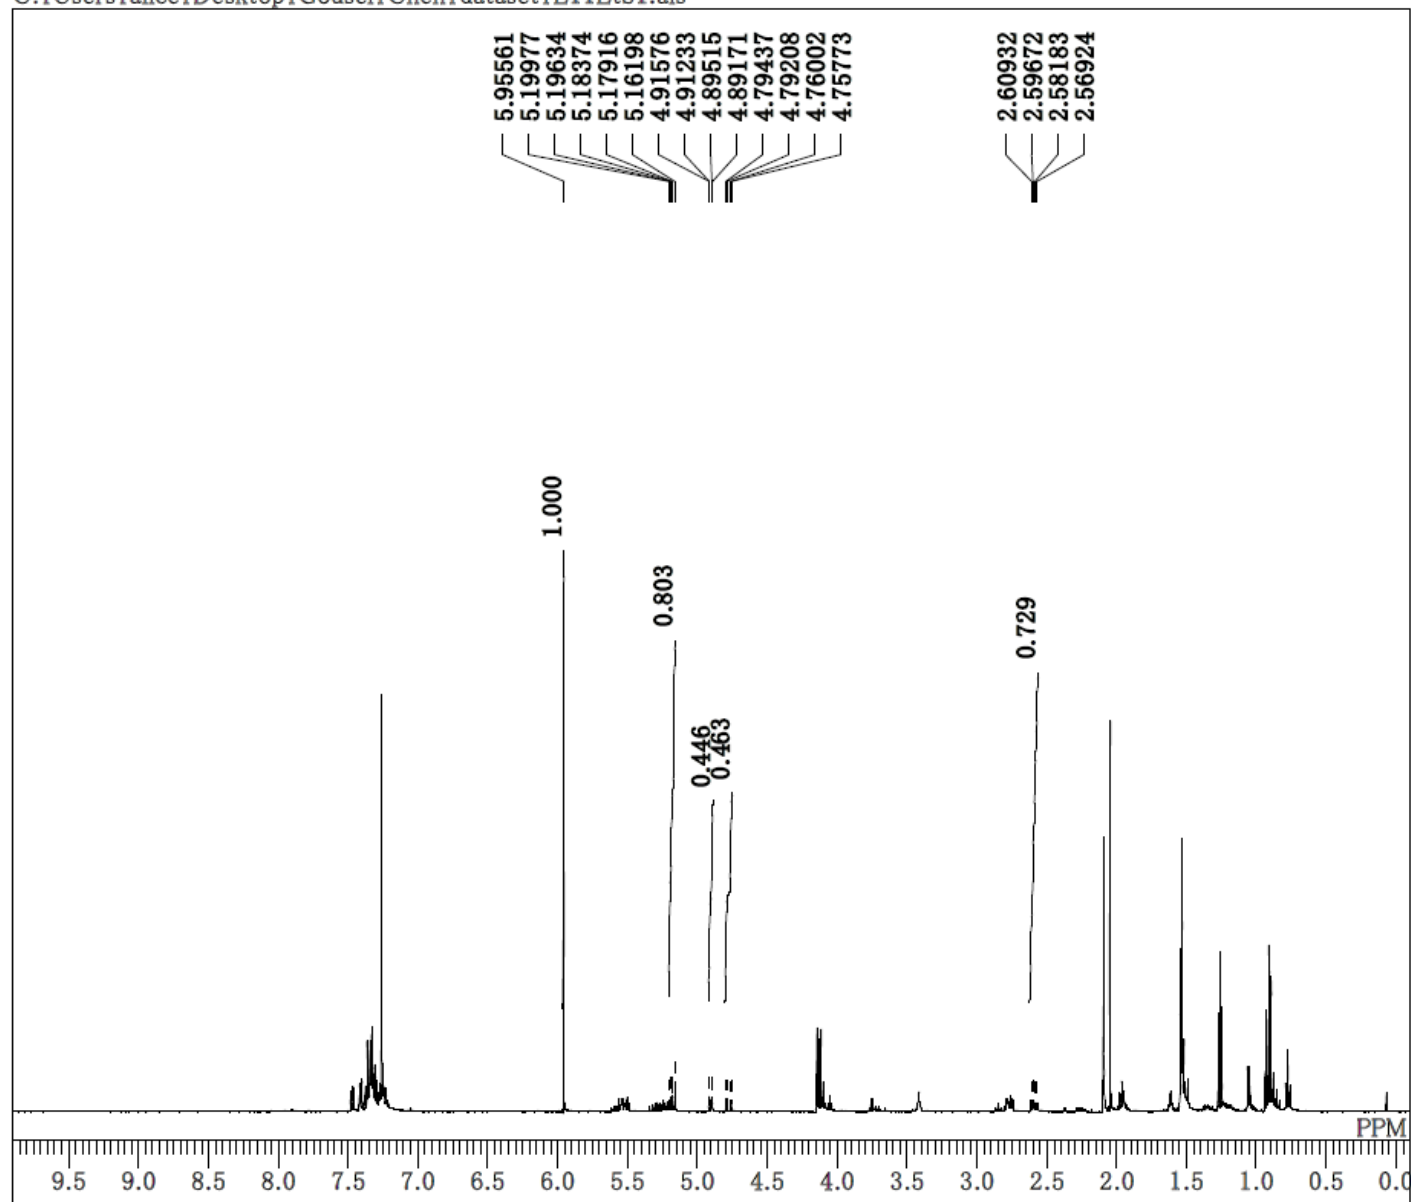

DFILE L11EtS1.als  
COMNT  
DATIM 2018-12-05 09:27:38  
OBNUC 1H  
EXMOD proton.jxp  
OBFRQ 500.16 MHz  
OBSET 2.41 KHz  
OBFIN 6.01 Hz  
POINT 13107  
FREQU 7507.51 Hz  
SCANS 8  
ACQTM 1.7459 sec  
PD 5.0000 sec  
PW1 5.55 usec  
IRNUC 1H  
CTEMP 21.6 c  
SLVNT CDCL3  
EXREF 7.26 ppm  
BF 0.12 Hz  
RGAIN 32

**L11/1Et, S**

(1<sup>st</sup> trial)

100%, 1/1.1 dr, 1.2/1 b/l

C:\Users\Valice\Desktop\Gousei\Chen\dataset\L11EtS2.als

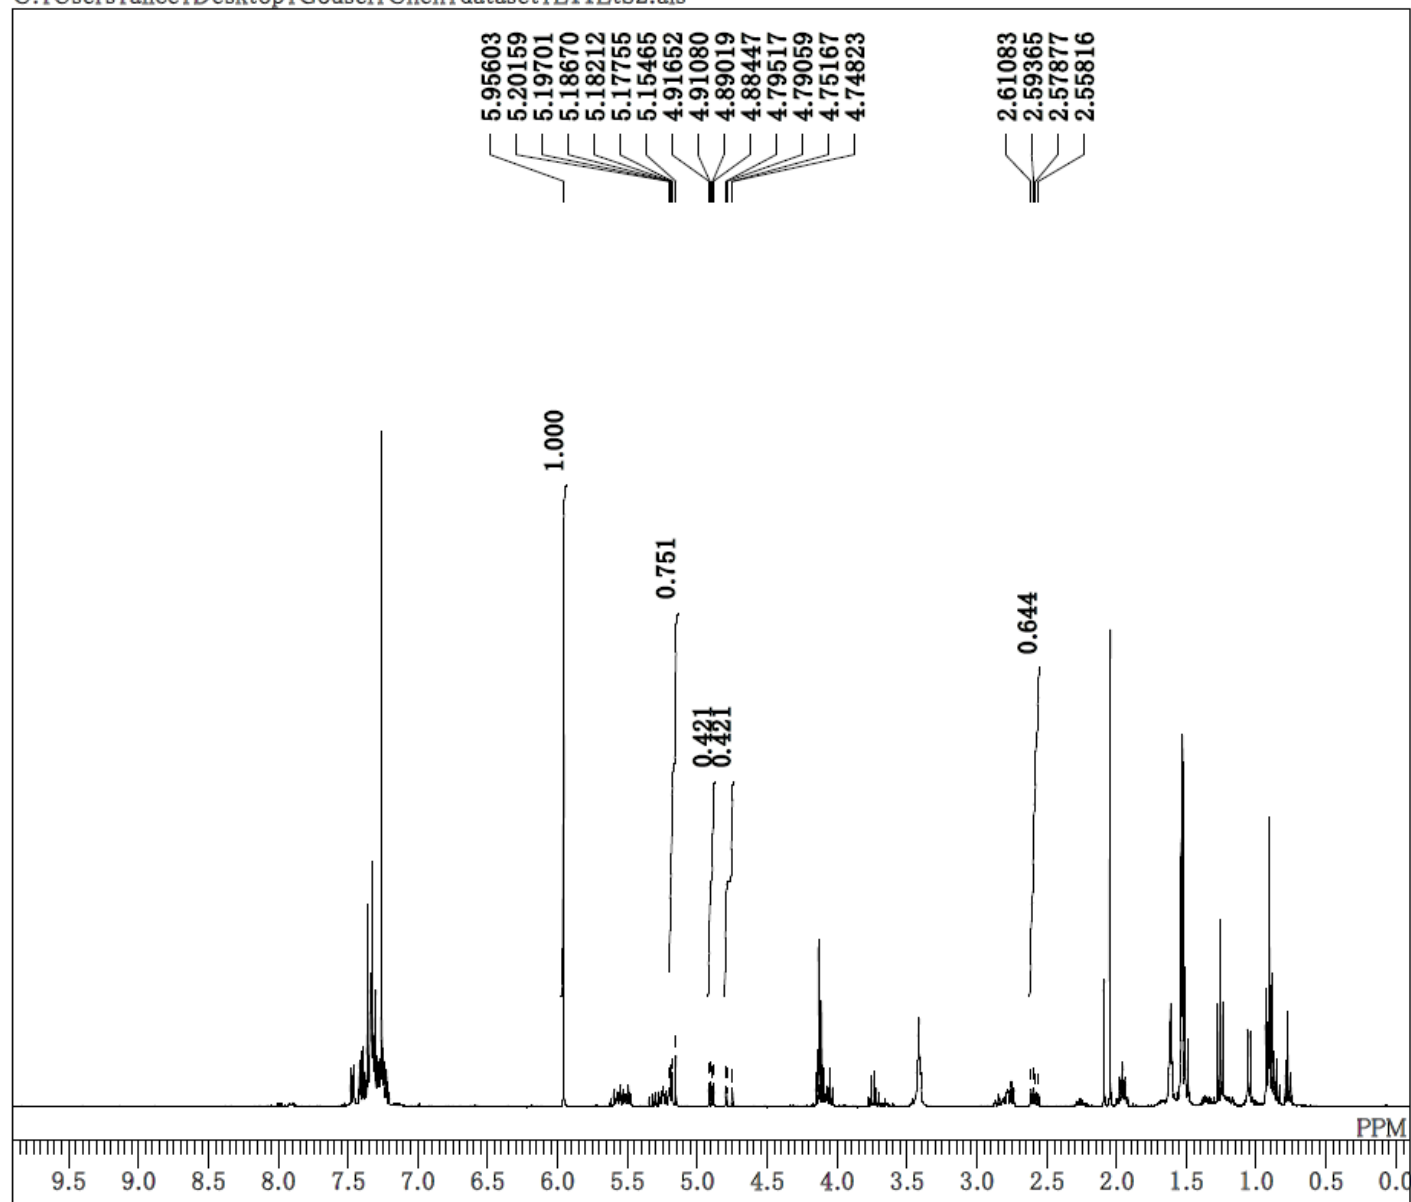

DFILE L11EtS2.als  
COMNT  
DATIM 03-09-2020 20:52:34  
OBNUC 1H  
EXMOD proton.jxp  
OBFRQ 391.78 MHz  
OBSET 8.51 KHz  
OBFIN 3.34 Hz  
POINT 13107  
FREQU 5878.90 Hz  
SCANS 16  
ACQTM 2.2295 sec  
PD 6.0000 sec  
PW1 5.17 usec  
IRNUC 1H  
CTEMP 20.6 c  
SLVNT CDCL3  
EXREF 7.26 ppm  
BF 0.12 Hz  
RGAIN 40

**L11/1Et, S**

(2<sup>nd</sup> trial)

91%, 1/1.1 dr, 1.2/1 b/l

C:\Users\Valice\Desktop\Gousei\Chen\dataset\L11PrS1.als

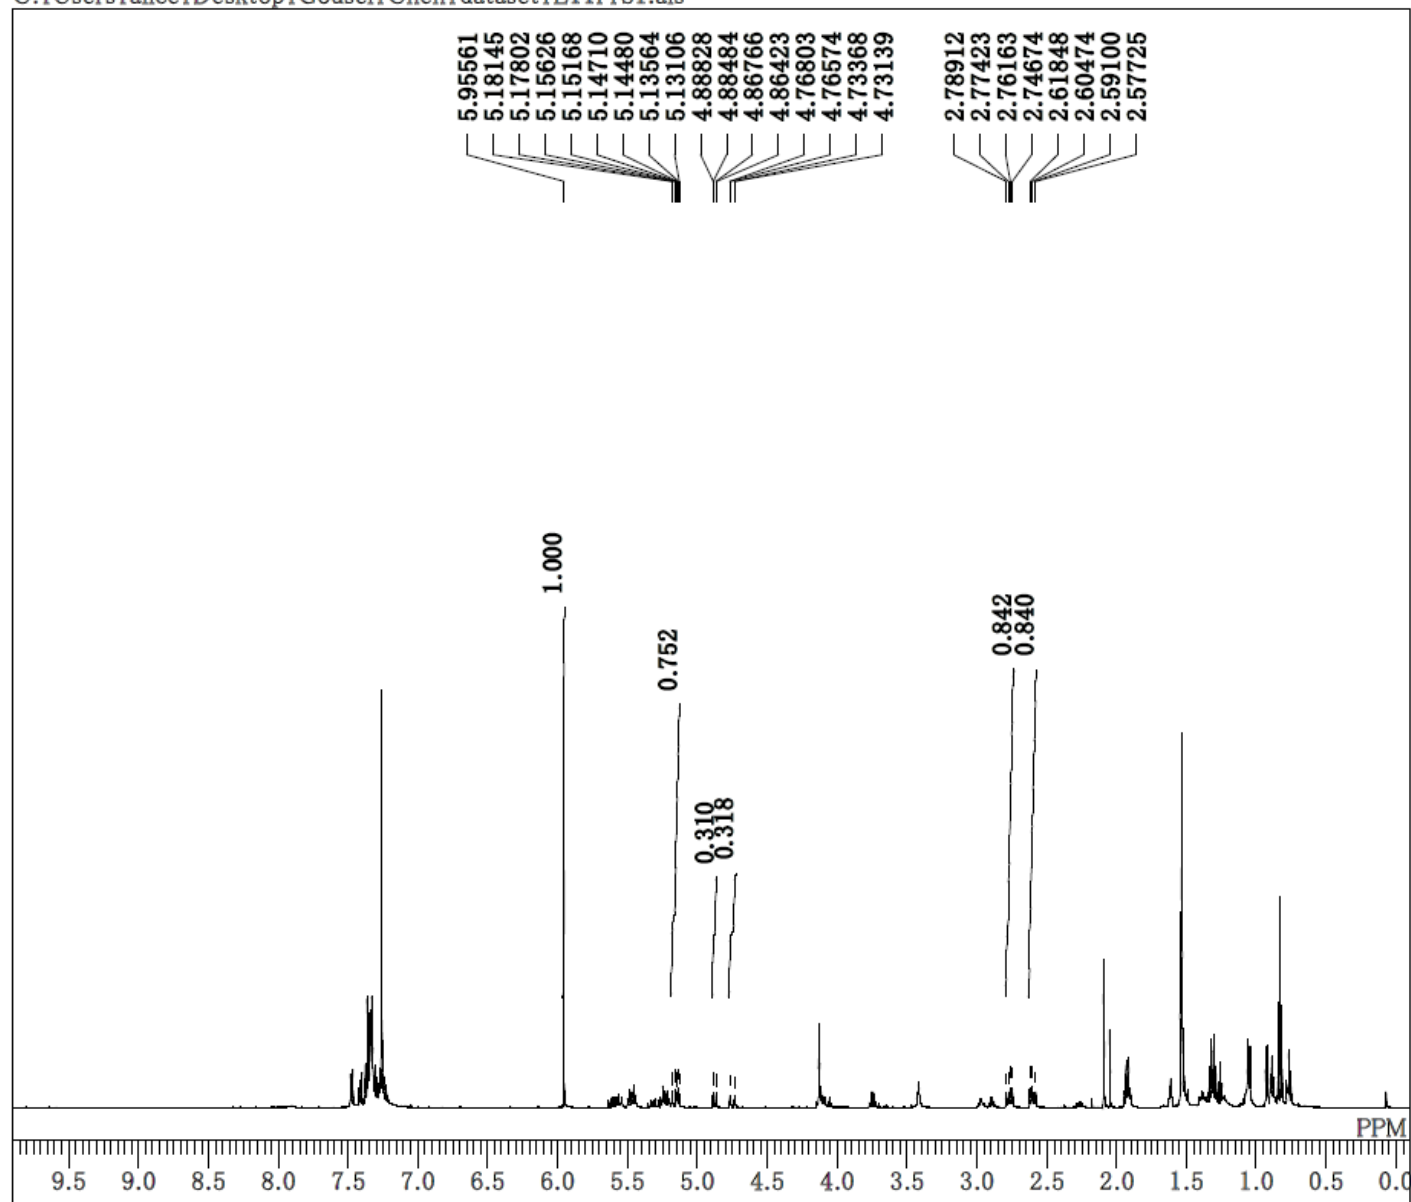

DFILE L11PrS1.als  
 COMNT  
 DATIM 2018-12-03 17:47:15  
 OBNUC 1H  
 EXMOD proton.jxp  
 OBFRQ 500.16 MHz  
 OBSET 2.41 KHz  
 OBFIN 6.01 Hz  
 POINT 13107  
 FREQU 7507.51 Hz  
 SCANS 8  
 ACQTM 1.7459 sec  
 PD 5.0000 sec  
 PW1 5.55 usec  
 IRNUC 1H  
 CTEMP 21.8 c  
 SLVNT CDCL3  
 EXREF 7.26 ppm  
 BF 0.12 Hz  
 RGAIN 32

**L11/1Pr, S**

(1<sup>st</sup> trial)

96%, 1.2/1 dr, 1/1.2 b/l

C:\Users\Valice\Desktop\Gousei\Chen\dataset\L11PrS2.als

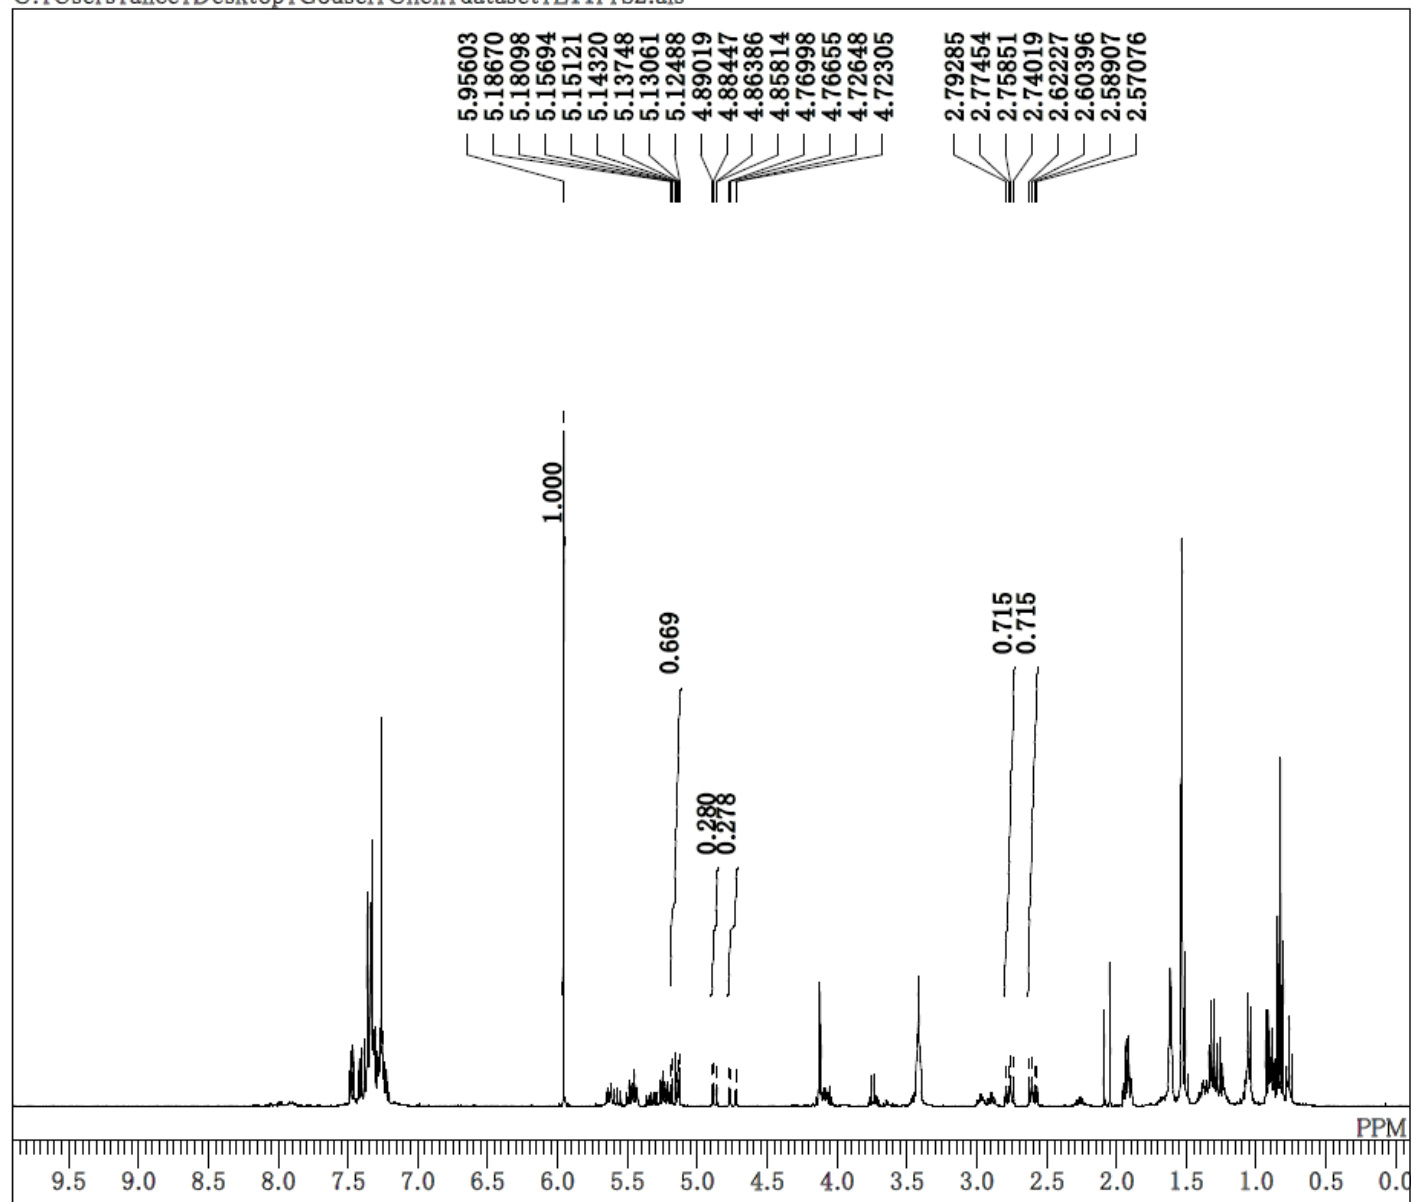

DFILE L11PrS2.als  
 COMNT  
 DATIM 04-09-2020 02:01:49  
 OBNUC 1H  
 EXMOD proton.jxp  
 OBFRQ 391.78 MHz  
 OBSET 8.51 KHz  
 OBFIN 3.34 Hz  
 POINT 13107  
 FREQU 5878.90 Hz  
 SCANS 8  
 ACQTM 2.2295 sec  
 PD 6.0000 sec  
 PW1 5.17 usec  
 IRNUC 1H  
 CTEMP 20.9 c  
 SLVNT CDCL3  
 EXREF 7.26 ppm  
 BF 0.12 Hz  
 RGAIN 36

**L11/1Pr, S**

(2<sup>nd</sup> trial)

84%, 1.2/1 dr, 1/1.2 b/l

C:\Users\Valice\Desktop\Gousei\Chen\dataset\L12EtS1.als

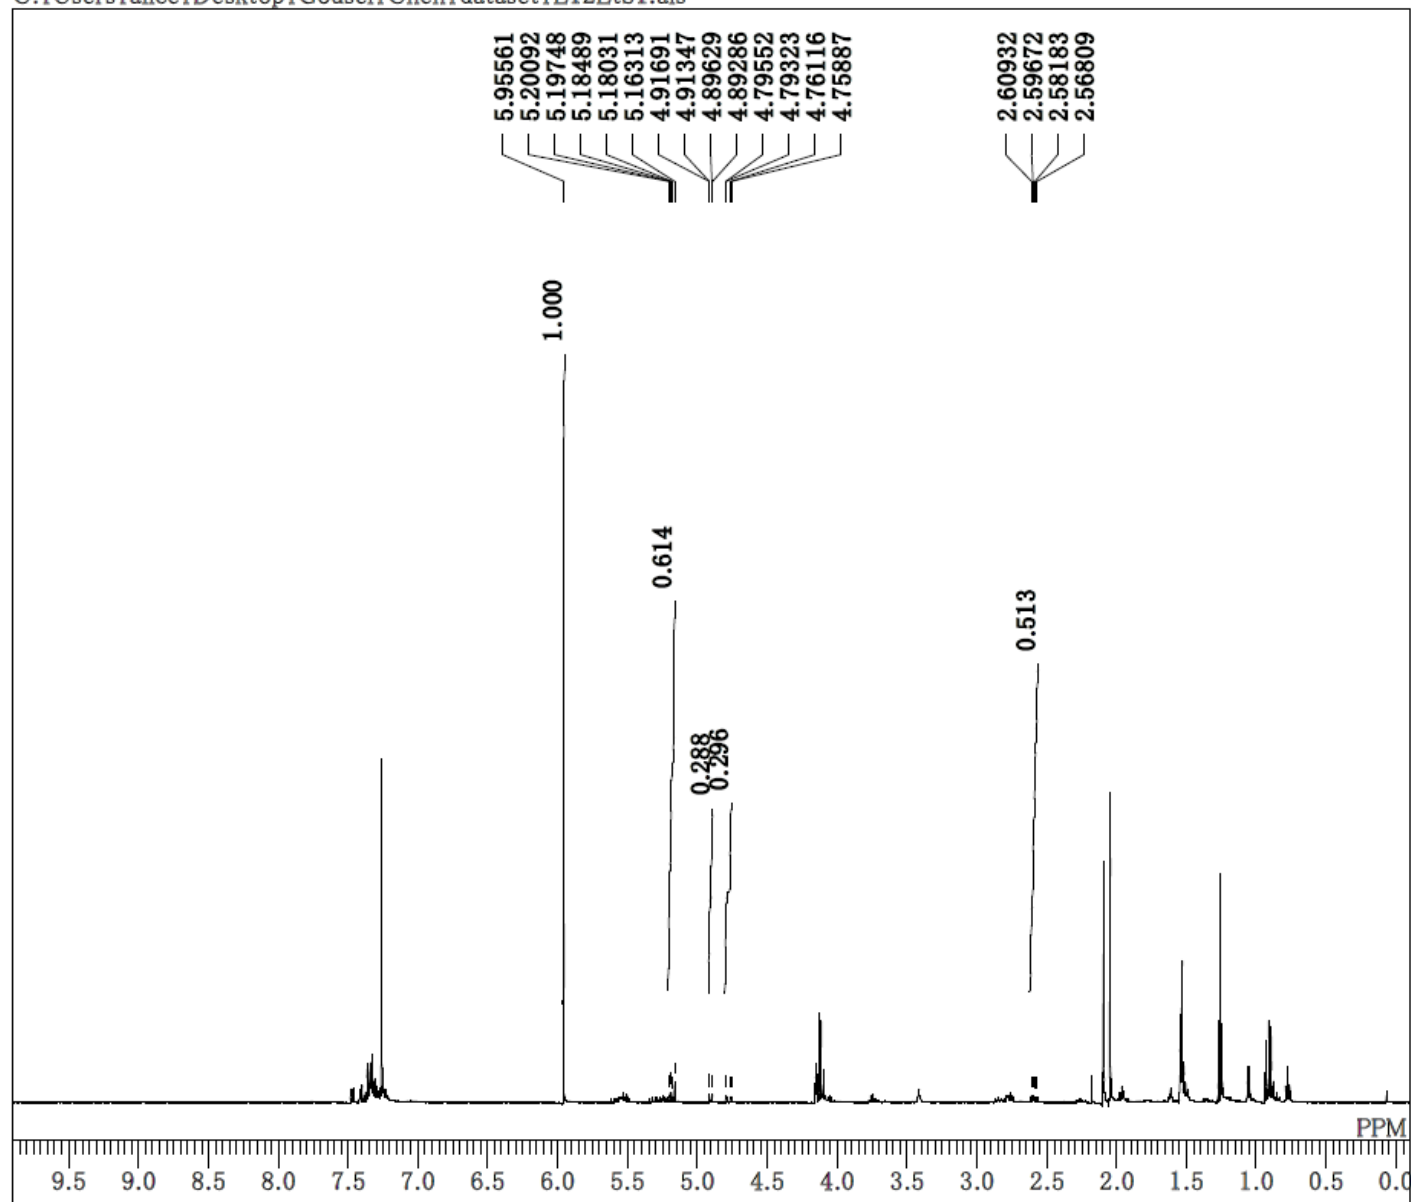

DFILE L12EtS1.als  
 COMNT  
 DATIM 2018-12-05 09:40:24  
 OBNUC 1H  
 EXMOD proton.jxp  
 OBFRQ 500.16 MHz  
 OBSET 2.41 KHz  
 OBFIN 6.01 Hz  
 POINT 13107  
 FREQU 7507.51 Hz  
 SCANS 8  
 ACQTM 1.7459 sec  
 PD 5.0000 sec  
 PW1 5.55 usec  
 IRNUC 1H  
 CTEMP 21.8 c  
 SLVNT CDCL3  
 EXREF 7.26 ppm  
 BF 0.12 Hz  
 RGAIN 32

**L12/1Et, S**

(1<sup>st</sup> trial)

84%, 1.1/1 dr, 1.2/1 b/l



C:\Users\Valice\Desktop\Gousei\Chen\dataset\L12EtS2.als

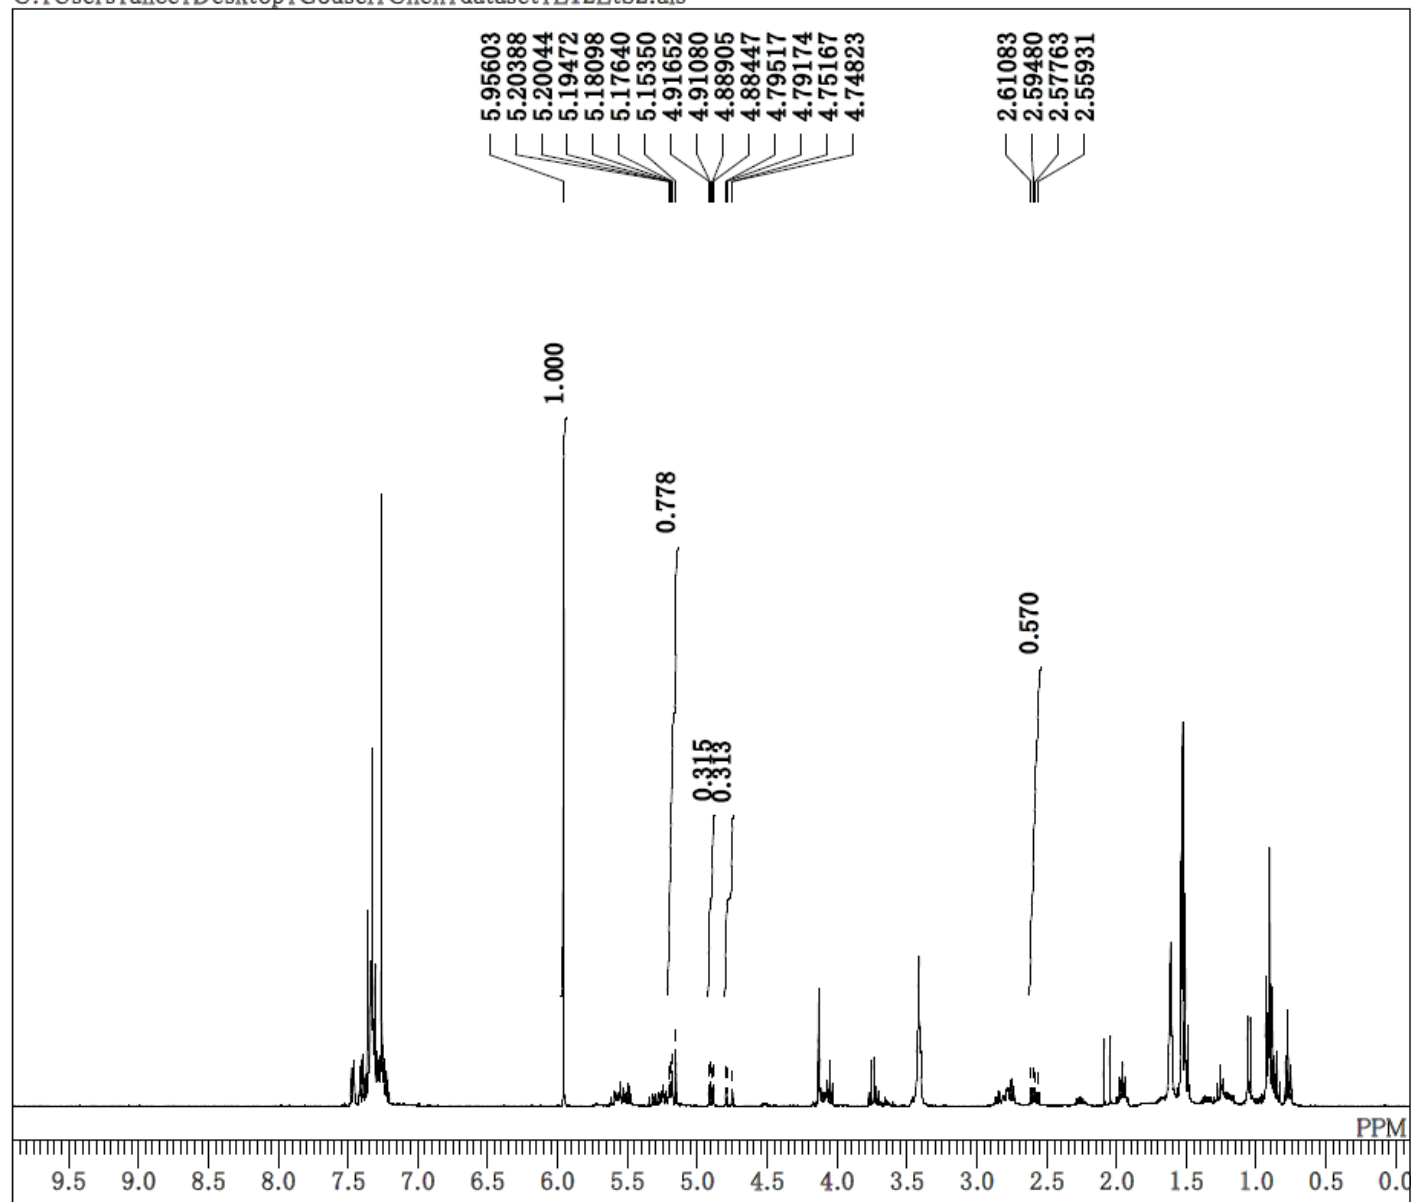

DFILE L12EtS2.als  
 COMNT  
 DATIM 23-08-2020 21:36:05  
 OBNUC 1H  
 EXMOD proton.jxp  
 OBFRQ 391.78 MHz  
 OBSET 8.51 KHz  
 OBFIN 3.34 Hz  
 POINT 13107  
 FREQU 5878.90 Hz  
 SCANS 8  
 ACQTM 2.2295 sec  
 PD 6.0000 sec  
 PW1 5.17 usec  
 IRNUC 1H  
 CTEMP 20.7 c  
 SLVNT CDCL3  
 EXREF 7.26 ppm  
 BF 0.12 Hz  
 RGAIN 40

**L12/1Et, S**

(2<sup>nd</sup> trial)

80%, 1.2/1 dr, 1.2/1 b/l

C:\Users\Valice\Desktop\Gousei\Chen\dataset\L12PrS1.als

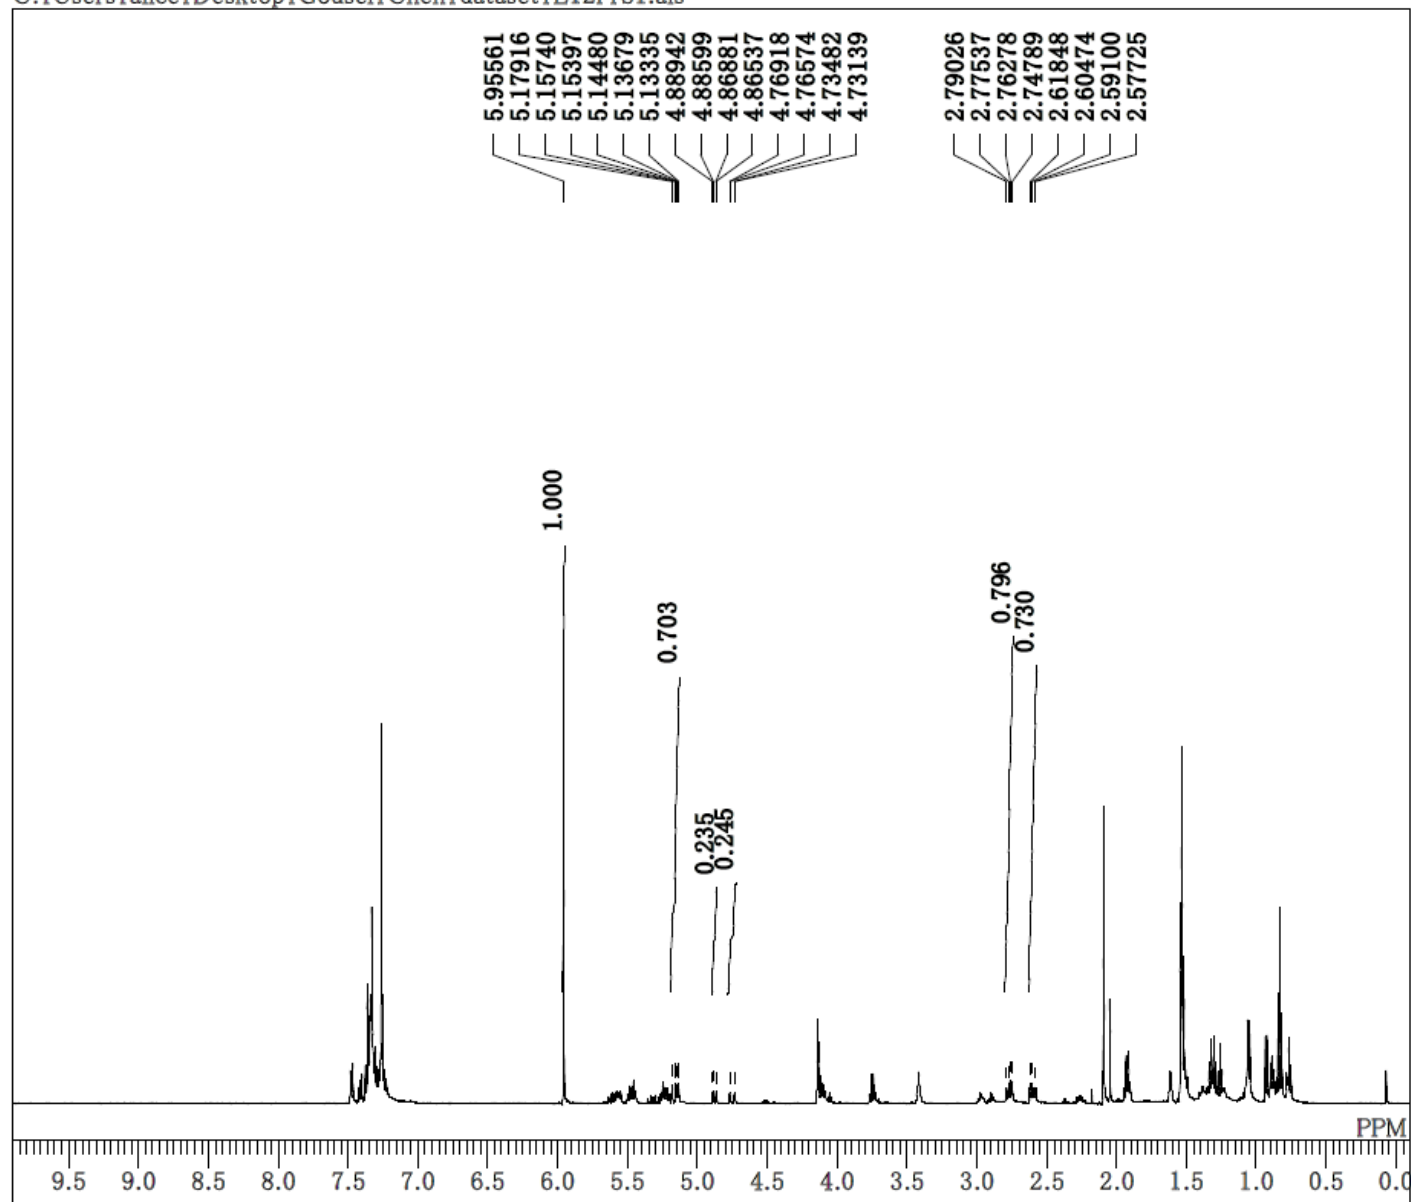

DFILE L12PrS1.als  
 COMNT  
 DATIM 2018-12-03 18:00:56  
 OBNUC 1H  
 EXMOD proton.jxp  
 OBFRQ 500.16 MHz  
 OBSET 2.41 KHz  
 OBFIN 6.01 Hz  
 POINT 13107  
 FREQU 7507.51 Hz  
 SCANS 8  
 ACQTM 1.7459 sec  
 PD 5.0000 sec  
 PW1 5.55 usec  
 IRNUC 1H  
 CTEMP 21.8 c  
 SLVNT CDCL3  
 EXREF 7.26 ppm  
 BF 0.12 Hz  
 RGAIN 32

**L12/1Pr, S**

(1<sup>st</sup> trial)

85%, 1.5/1 dr, 1/1.3 b/l

C:\Users\Valice\Desktop\Gousei\Chen\dataset\L12PrS2.als

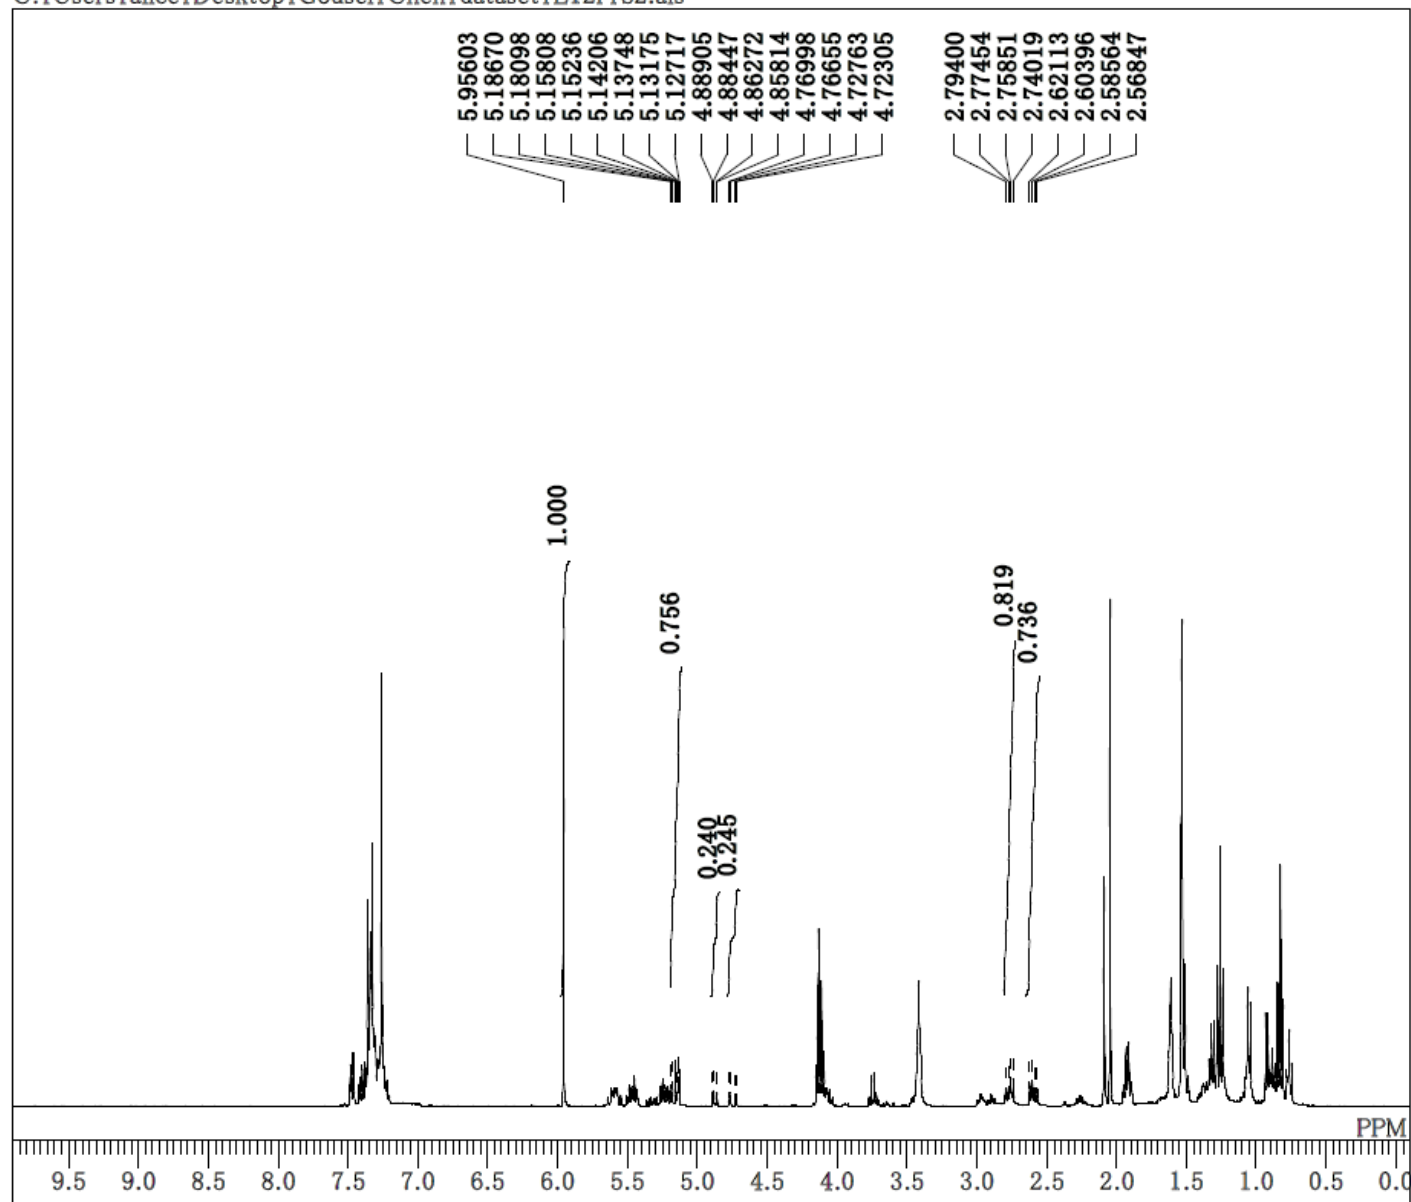

DFILE L12PrS2.als  
 COMNT  
 DATIM 22-08-2020 14:05:15  
 OBNUC 1H  
 EXMOD proton.jxp  
 OBFRQ 391.78 MHz  
 OBSET 8.51 KHz  
 OBFIN 3.34 Hz  
 POINT 13107  
 FREQU 5878.90 Hz  
 SCANS 8  
 ACQTM 2.2295 sec  
 PD 6.0000 sec  
 PW1 5.17 usec  
 IRNUC 1H  
 CTEMP 20.8 c  
 SLVNT CDCL3  
 EXREF 7.26 ppm  
 BF 0.62 Hz  
 RGAIN 40

**L12/1Pr, S**

(2<sup>nd</sup> trial)

85%, 1.6/1 dr, 1/1.2 b/l

C:\Users\Valice\Desktop\Gousei\Chen\dataset\L13EtR1.als

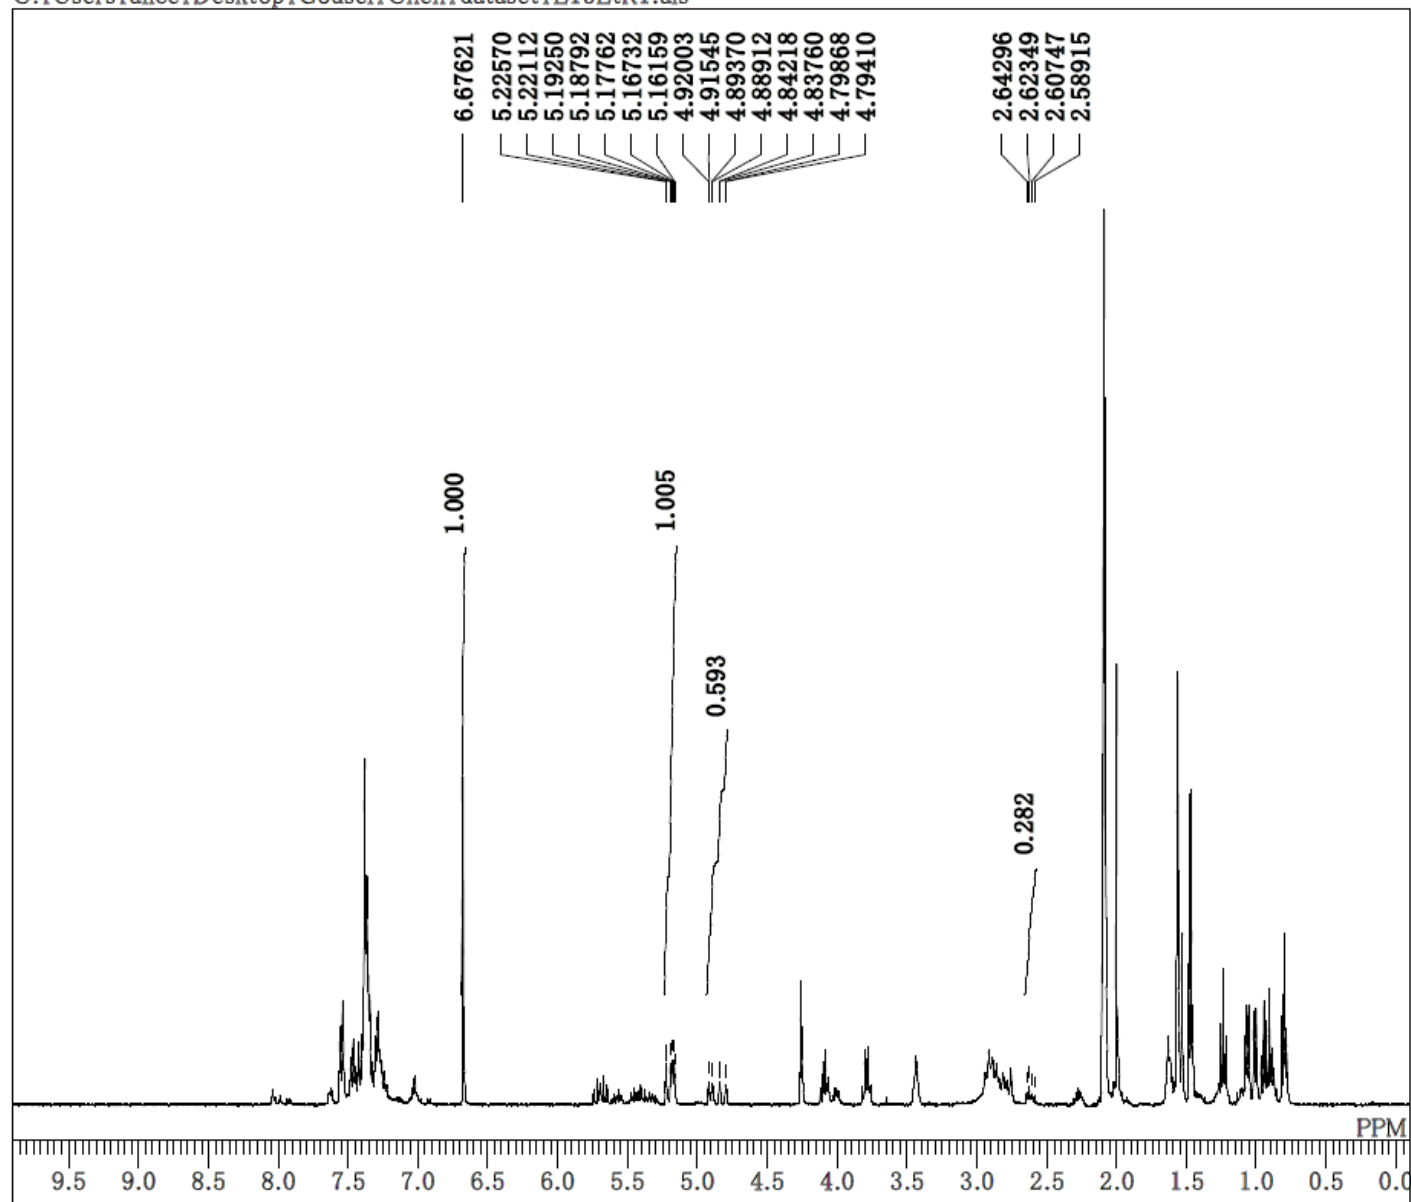

DFILE L13EtR1.als  
 COMNT  
 DATIM 16-12-2018 20:51:53  
 OBNUC 1H  
 EXMOD proton.jxp  
 OBFRQ 391.78 MHz  
 OBSET 8.51 KHz  
 OBFIN 3.34 Hz  
 POINT 13107  
 FREQU 5878.90 Hz  
 SCANS 8  
 ACQTM 2.2295 sec  
 PD 5.0000 sec  
 PW1 5.22 usec  
 IRNUC 1H  
 CTEMP 20.2 c  
 SLVNT ACETN  
 EXREF 2.09 ppm  
 BF 0.12 Hz  
 RGAIN 44

**L13/1Et, S**

(1<sup>st</sup> trial)

68%, 1.7/1 dr, 2.8/1 b/l

C:\Users\alice\Desktop\Gousei\Chen\dataset\L13EtS2.als

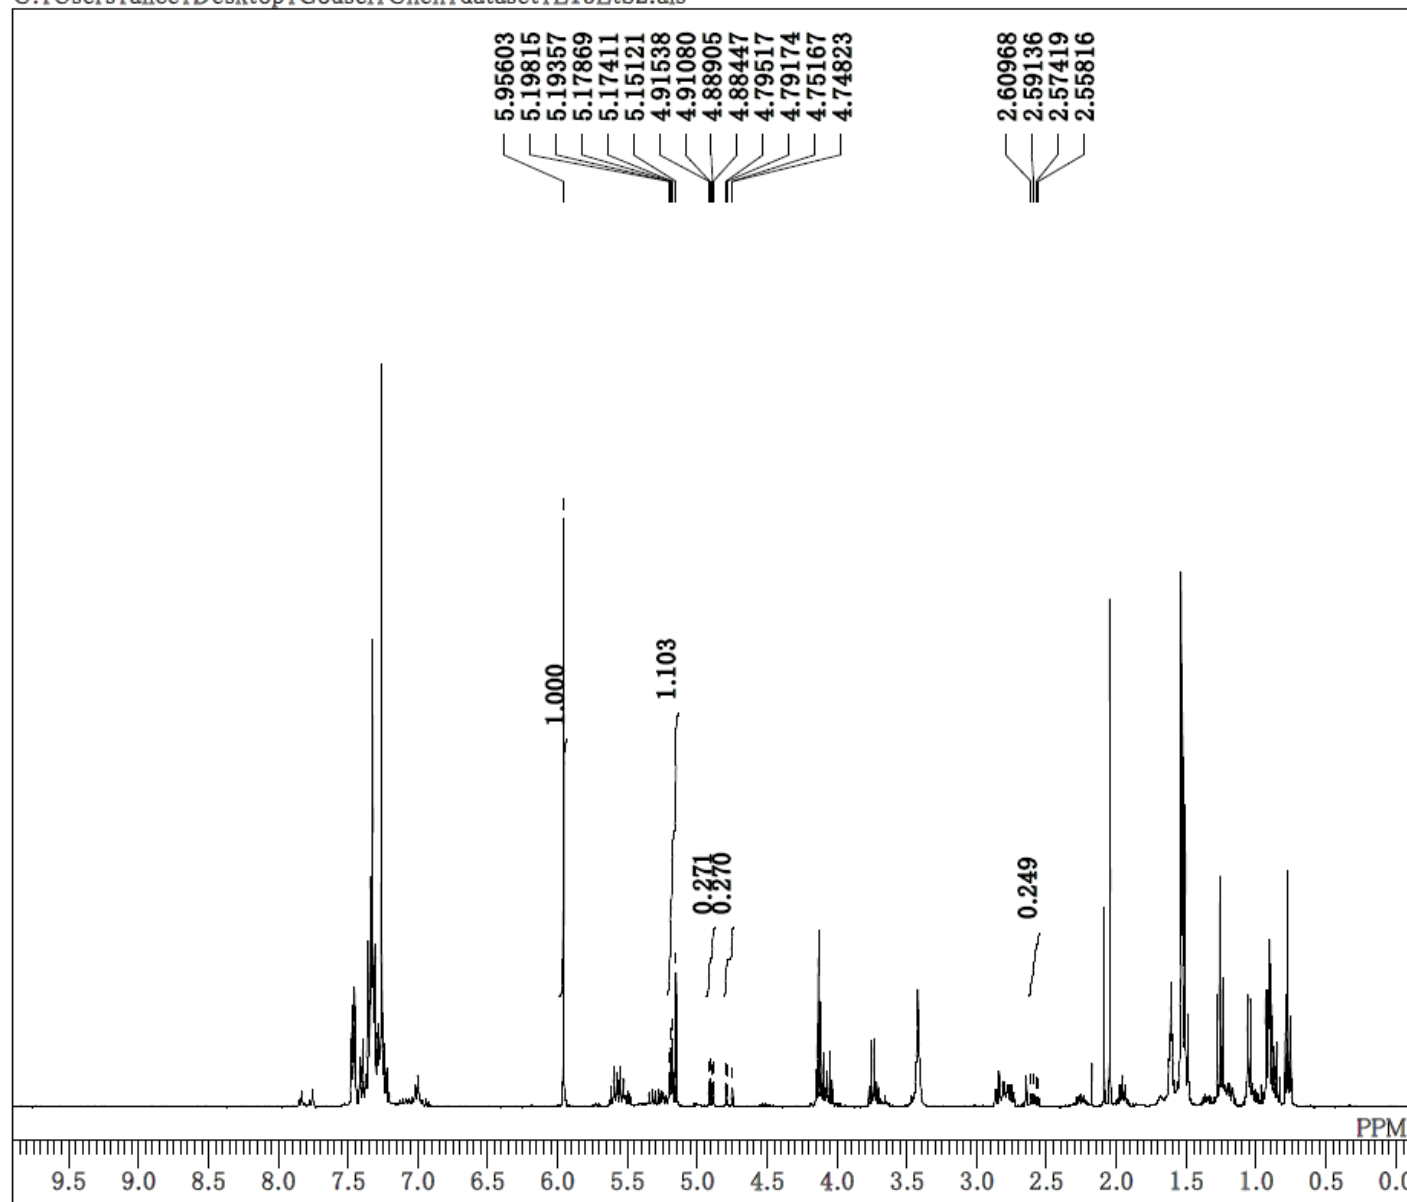

DFILE L13EtS2.als  
COMNT  
DATIM 26-08-2020 23:24:12  
OBNUC 1H  
EXMOD proton.jxp  
OBFRQ 391.78 MHz  
OBSET 8.51 KHz  
OBFIN 3.34 Hz  
POINT 13107  
FREQU 5878.90 Hz  
SCANS 8  
ACQTM 2.2295 sec  
PD 6.0000 sec  
PW1 5.17 usec  
IRNUC 1H  
CTEMP 20.9 c  
SLVNT CDCL3  
EXREF 7.26 ppm  
BF 0.42 Hz  
RGAIN 40

**L13/1Et, S**

(2<sup>nd</sup> trial)

67%, 2.0/1 dr, 3.3/1 b/l

C:\Users\Valice\Desktop\Gousei\Chen\dataset\L13PrS1.als

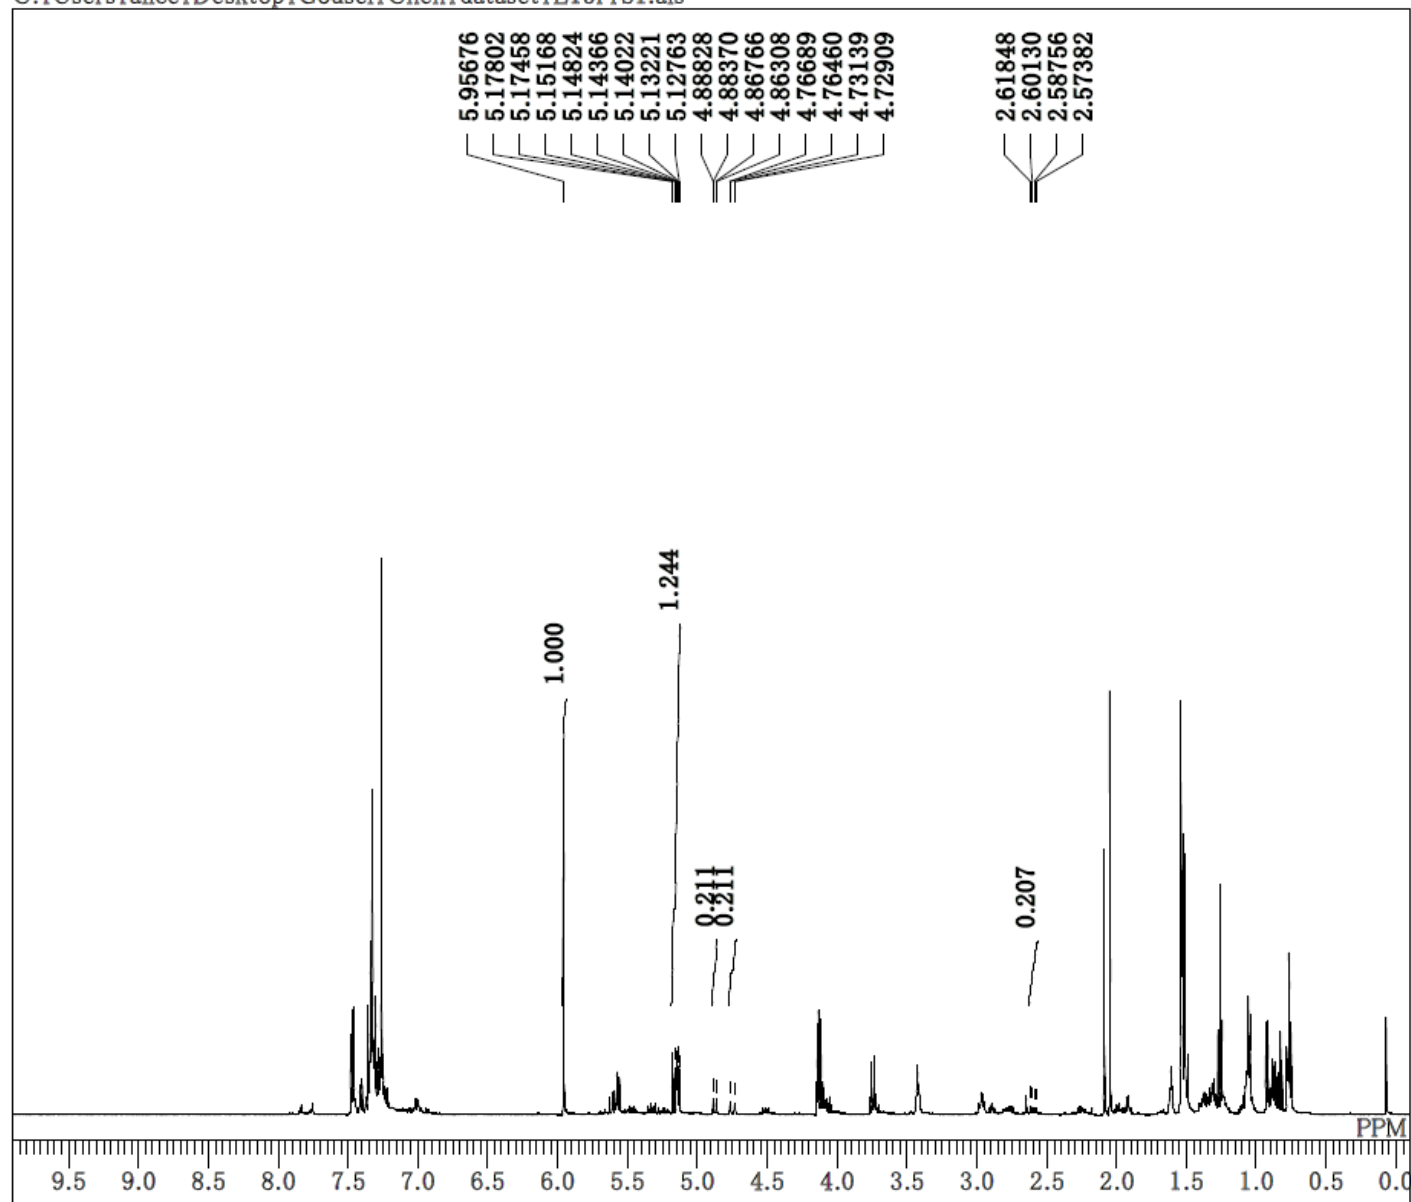

DFILE L13PrS1.als  
 COMNT  
 DATIM 2018-05-15 17:09:29  
 OBNUC 1H  
 EXMOD proton.jxp  
 OBFRQ 500.16 MHz  
 OBSET 2.41 KHz  
 OBFIN 6.01 Hz  
 POINT 13107  
 FREQU 7507.51 Hz  
 SCANS 8  
 ACQTM 1.7459 sec  
 PD 5.0000 sec  
 PW1 5.55 usec  
 IRNUC 1H  
 CTEMP 21.4 c  
 SLVNT CDCL3  
 EXREF 7.26 ppm  
 BF 0.12 Hz  
 RGAIN 32

**L13/1Pr, S**

(1<sup>st</sup> trial)

65%, 2.9/1 dr, 4.0/1 b/l

C:\Users\Valice\Desktop\Gousei\Chen\dataset\L13PrS2.als

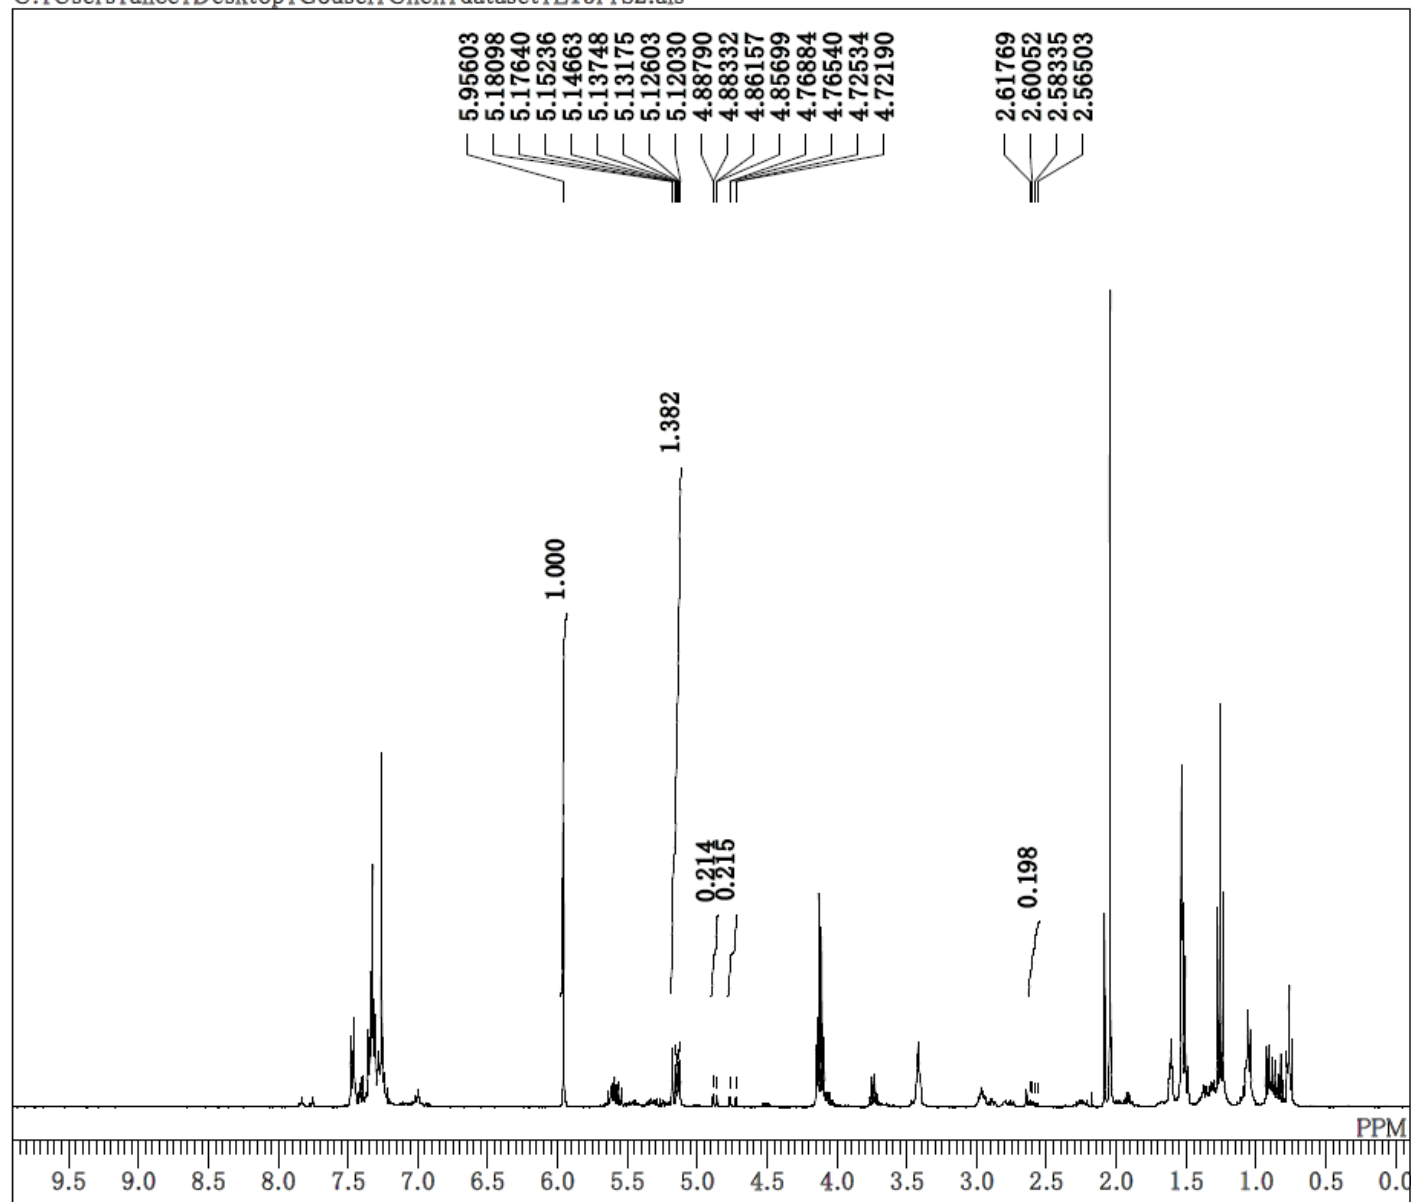

DFILE L13PrS2.als  
 COMNT  
 DATIM 26-08-2020 23:32:29  
 OBNUC 1H  
 EXMOD proton.jxp  
 OBFRQ 391.78 MHz  
 OBSET 8.51 KHz  
 OBFIN 3.34 Hz  
 POINT 13107  
 FREQU 5878.90 Hz  
 SCANS 8  
 ACQTM 2.2295 sec  
 PD 6.0000 sec  
 PW1 5.17 usec  
 IRNUC 1H  
 CTEMP 20.9 c  
 SLVNT CDCL3  
 EXREF 7.26 ppm  
 BF 0.42 Hz  
 RGAIN 38

**L13/1Pr, S**

(2<sup>nd</sup> trial)

70%, 3.2/1 dr, 4.6/1 b/l

C:\Users\Valice\Desktop\Gousei\Chen\dataset\L14EtS1.als

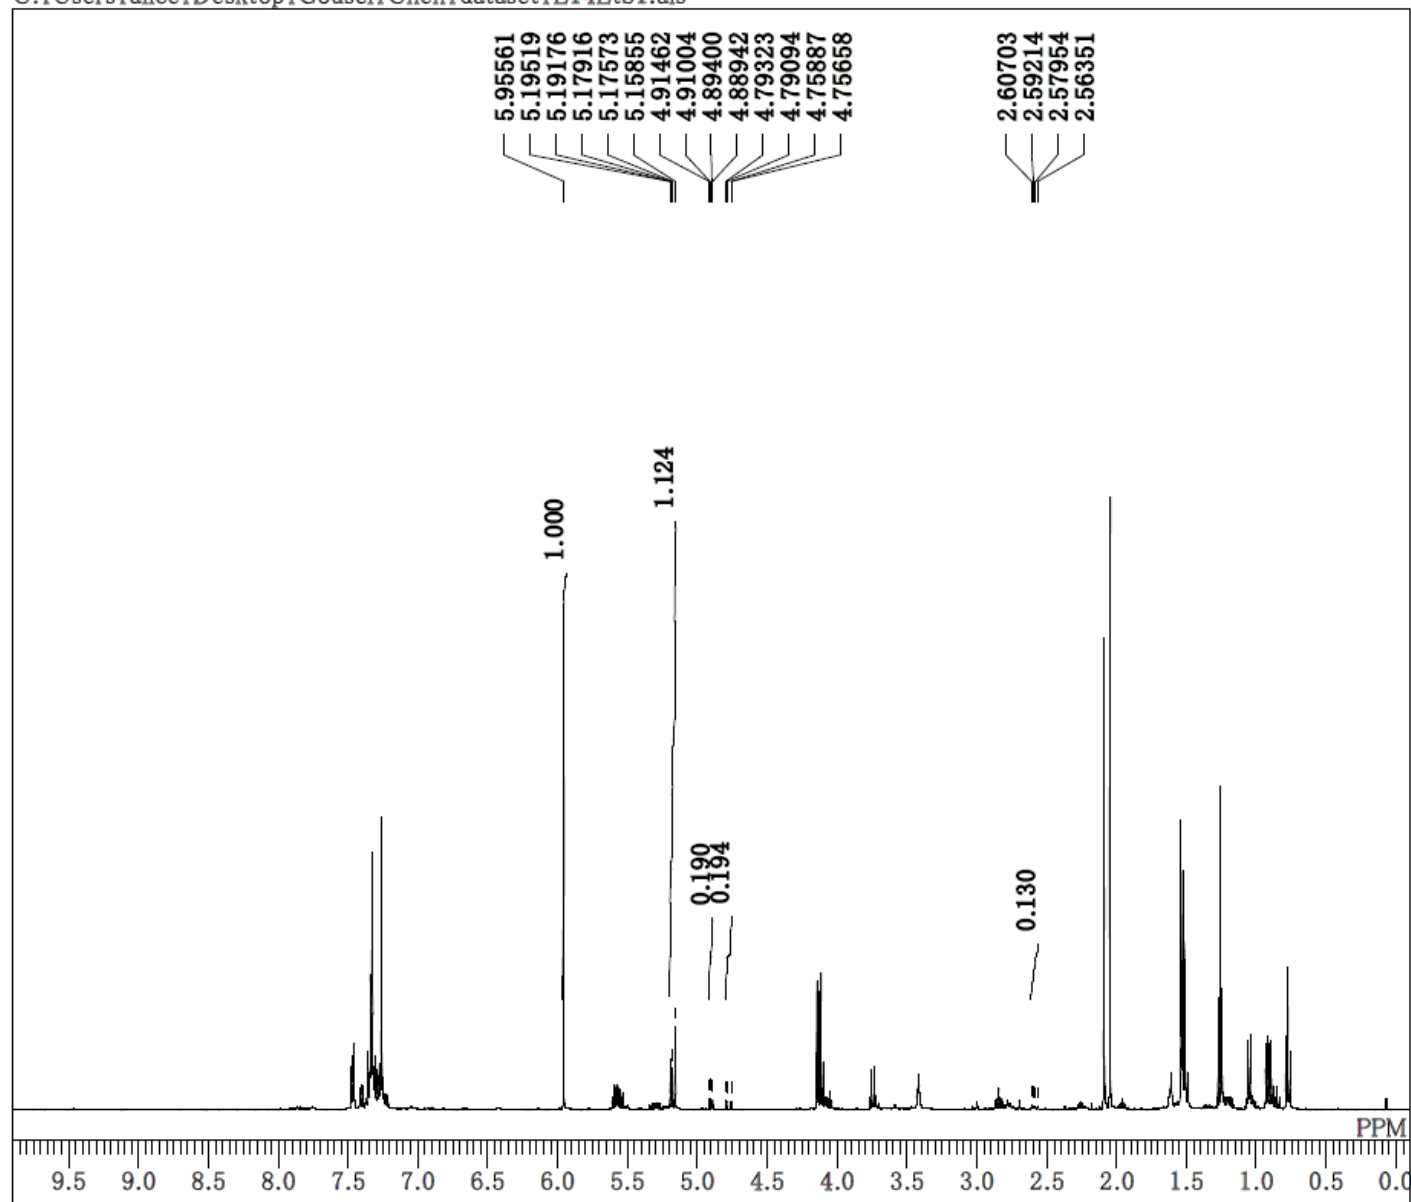

DFILE L14EtS1.als  
COMNT  
DATIM 2019-09-19 14:00:15  
OBNUC 1H  
EXMOD proton.jxp  
OBFRQ 500.16 MHz  
OBSET 2.41 KHz  
OBFIN 6.01 Hz  
POINT 13107  
FREQU 7507.51 Hz  
SCANS 8  
ACQTM 1.7459 sec  
PD 6.0000 sec  
PW1 5.55 usec  
IRNUC 1H  
CTEMP 21.6 c  
SLVNT CDCL3  
EXREF 7.26 ppm  
BF 0.12 Hz  
RGAIN 40

**L14/1Et, S**

(1<sup>st</sup> trial)

56%, 2.9/1 dr, 5.8/1 b/l



C:\Users\Valice\Desktop\Gousei\Chen\dataset\L14EtR2.als

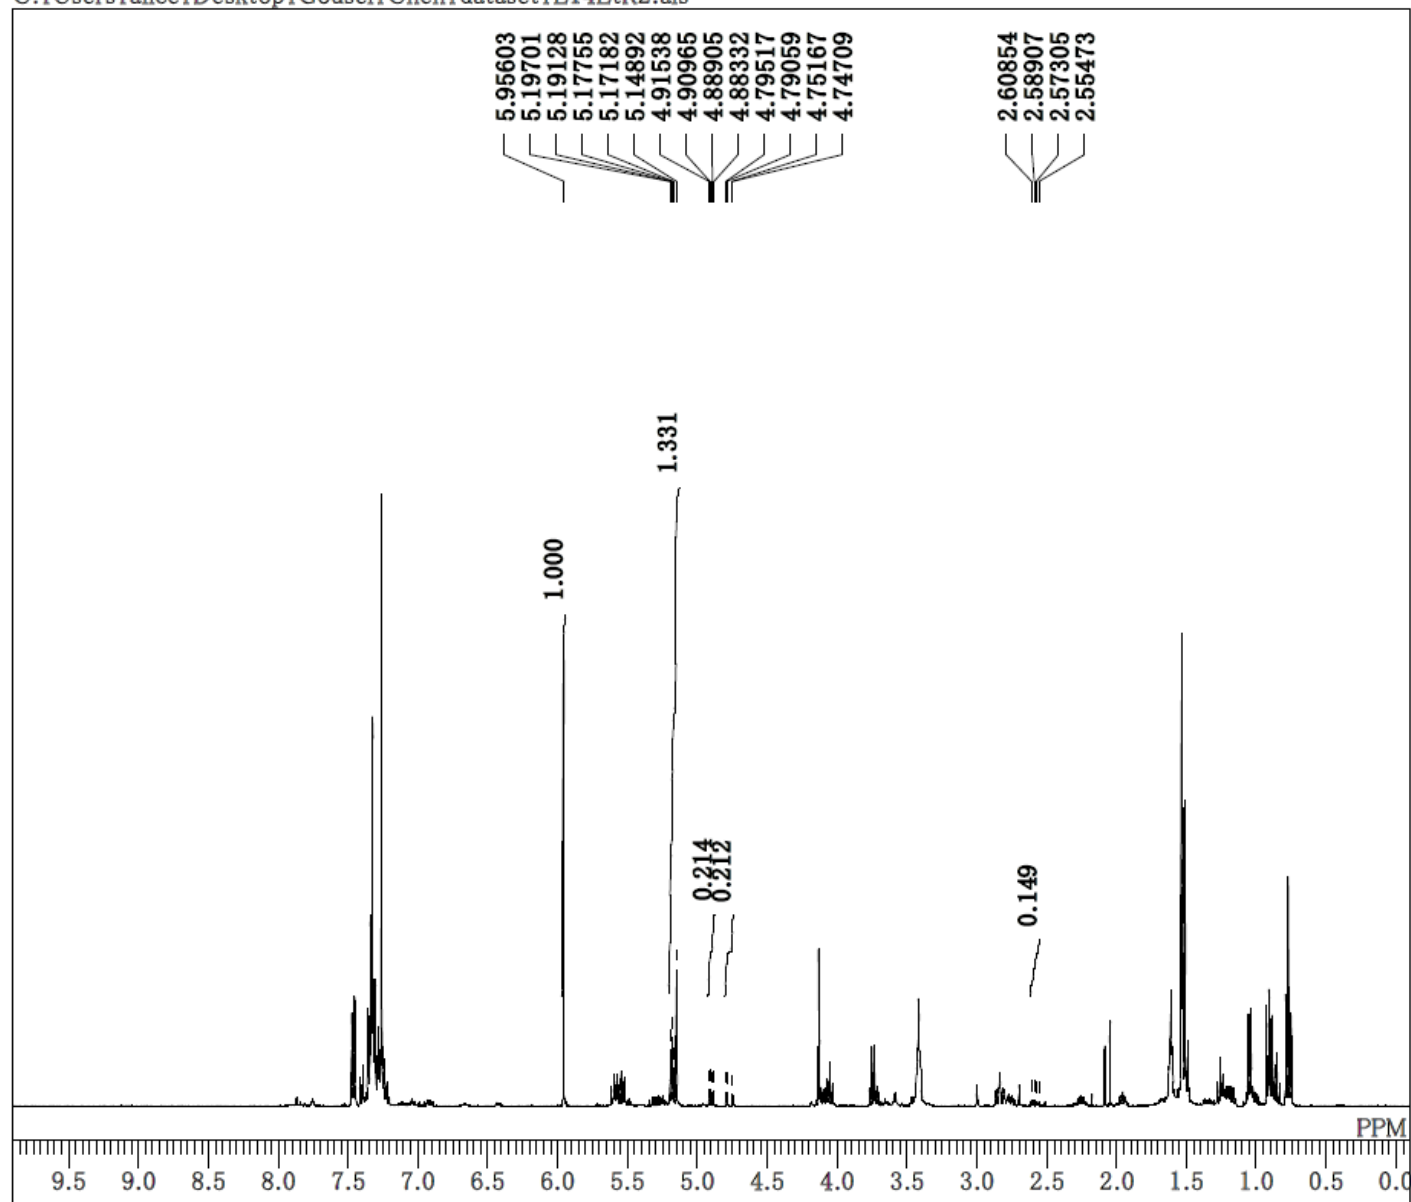

DFILE L14EtR2.als  
 COMNT  
 DATIM 07-09-2020 23:05:05  
 OBNUC 1H  
 EXMOD proton.jxp  
 OBFRQ 391.78 MHz  
 OBSET 8.51 KHz  
 OBFIN 3.34 Hz  
 POINT 13107  
 FREQU 5878.90 Hz  
 SCANS 8  
 ACQTM 2.2295 sec  
 PD 6.0000 sec  
 PW1 5.17 usec  
 IRNUC 1H  
 CTEMP 20.2 c  
 SLVNT CDCL3  
 EXREF 7.26 ppm  
 BF 0.12 Hz  
 RGAIN 40

**L14/1Et, S**

(2<sup>nd</sup> trial)

65%, 3.1/1 dr, 5.9/1 b/l

1.000

1.622

0.123

0.125

0.094

0.122

5.95561  
5.17687  
5.17229  
5.15053  
5.14595  
5.13793  
5.12992  
5.12534  
4.88713  
4.88370  
4.86652  
4.86308  
4.76689  
4.76345  
4.73253  
4.73024  
2.61619  
2.60130  
2.58756  
2.57267

PPM

**L14/1Pr, S**  
(1<sup>st</sup> trial)  
65%, 6.5/1 dr, 11/1 b/1

C:\Users\Valice\Desktop\Gousei\Chen\dataset\L14PrR2.als

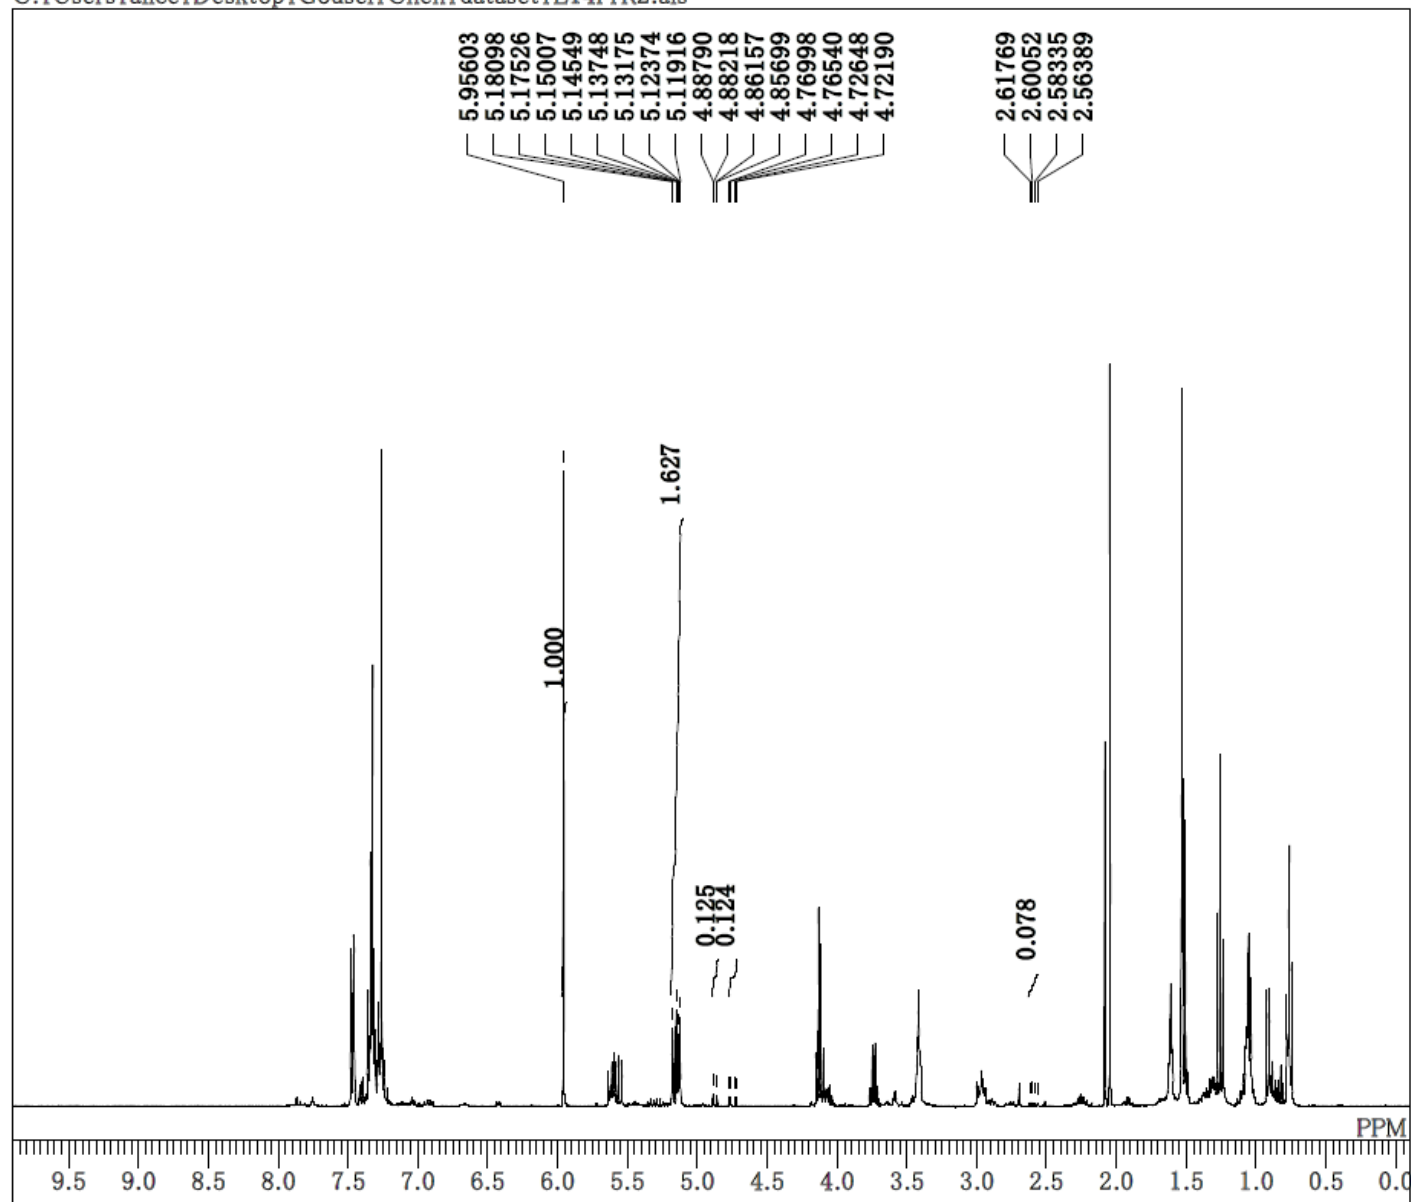

DFILE L14PrR2.als  
 COMNT  
 DATIM 07-09-2020 23:12:35  
 OBNUC 1H  
 EXMOD proton.jxp  
 OBFRQ 391.78 MHz  
 OBSET 8.51 KHz  
 OBFIN 3.34 Hz  
 POINT 13107  
 FREQU 5878.90 Hz  
 SCANS 8  
 ACQTM 2.2295 sec  
 PD 6.0000 sec  
 PW1 5.17 usec  
 IRNUC 1H  
 CTEMP 20.2 c  
 SLVNT CDCL3  
 EXREF 7.26 ppm  
 BF 0.12 Hz  
 RGAIN 38

**L14/1Pr, S**

(2<sup>nd</sup> trial)

64%, 6.5/1 dr, 12/1 b/l

C:\Users\Valice\Desktop\Gousei\Chen\dataset\L15EtS1.als

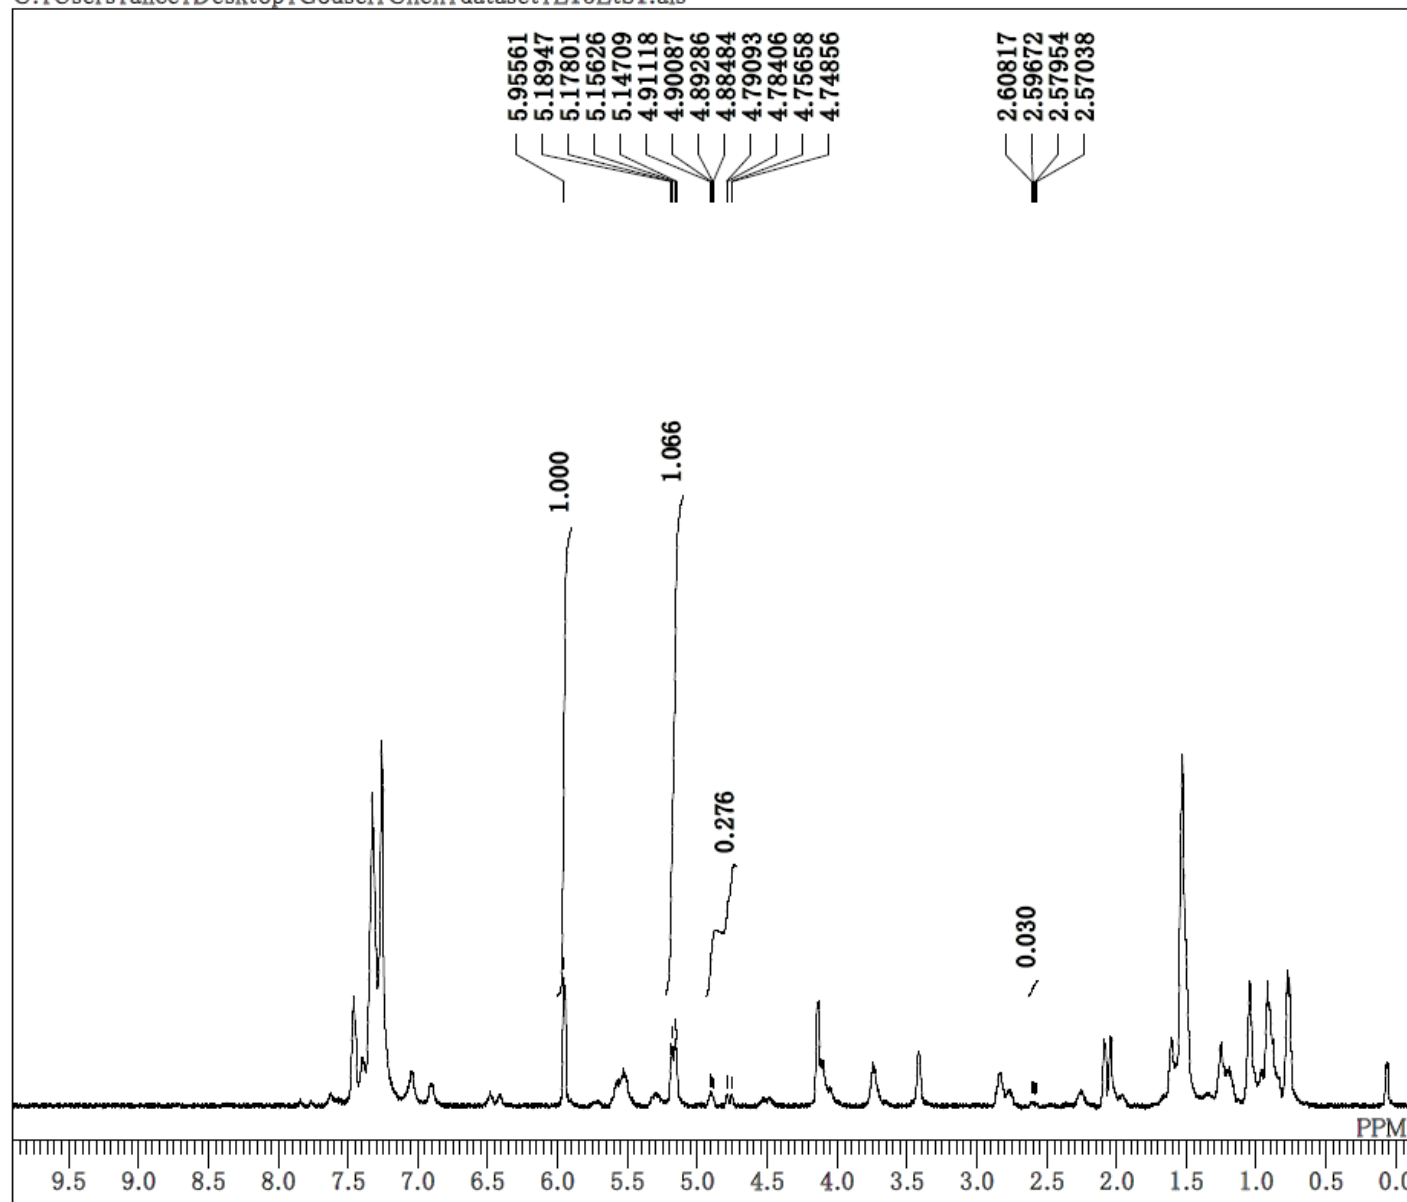

DFILE L15EtS1.als  
COMNT  
DATIM 2019-01-16 15:14:20  
OBNUC 1H  
EXMOD proton.jxp  
OBFRQ 500.16 MHz  
OBSET 2.41 KHz  
OBFIN 6.01 Hz  
POINT 13107  
FREQU 7507.51 Hz  
SCANS 8  
ACQTM 1.7459 sec  
PD 6.0000 sec  
PW1 5.55 usec  
IRNUC 1H  
CTEMP 22.0 c  
SLVNT CDCL3  
EXREF 7.26 ppm  
BF 0.12 Hz  
RGAIN 30

**L15/1Et, S**

(1<sup>st</sup> trial)

44%, 3.9/1 dr, 22.4/1 b/l

C:\Users\Valice\Desktop\Gousei\Chen\dataset\L15EtS2.als

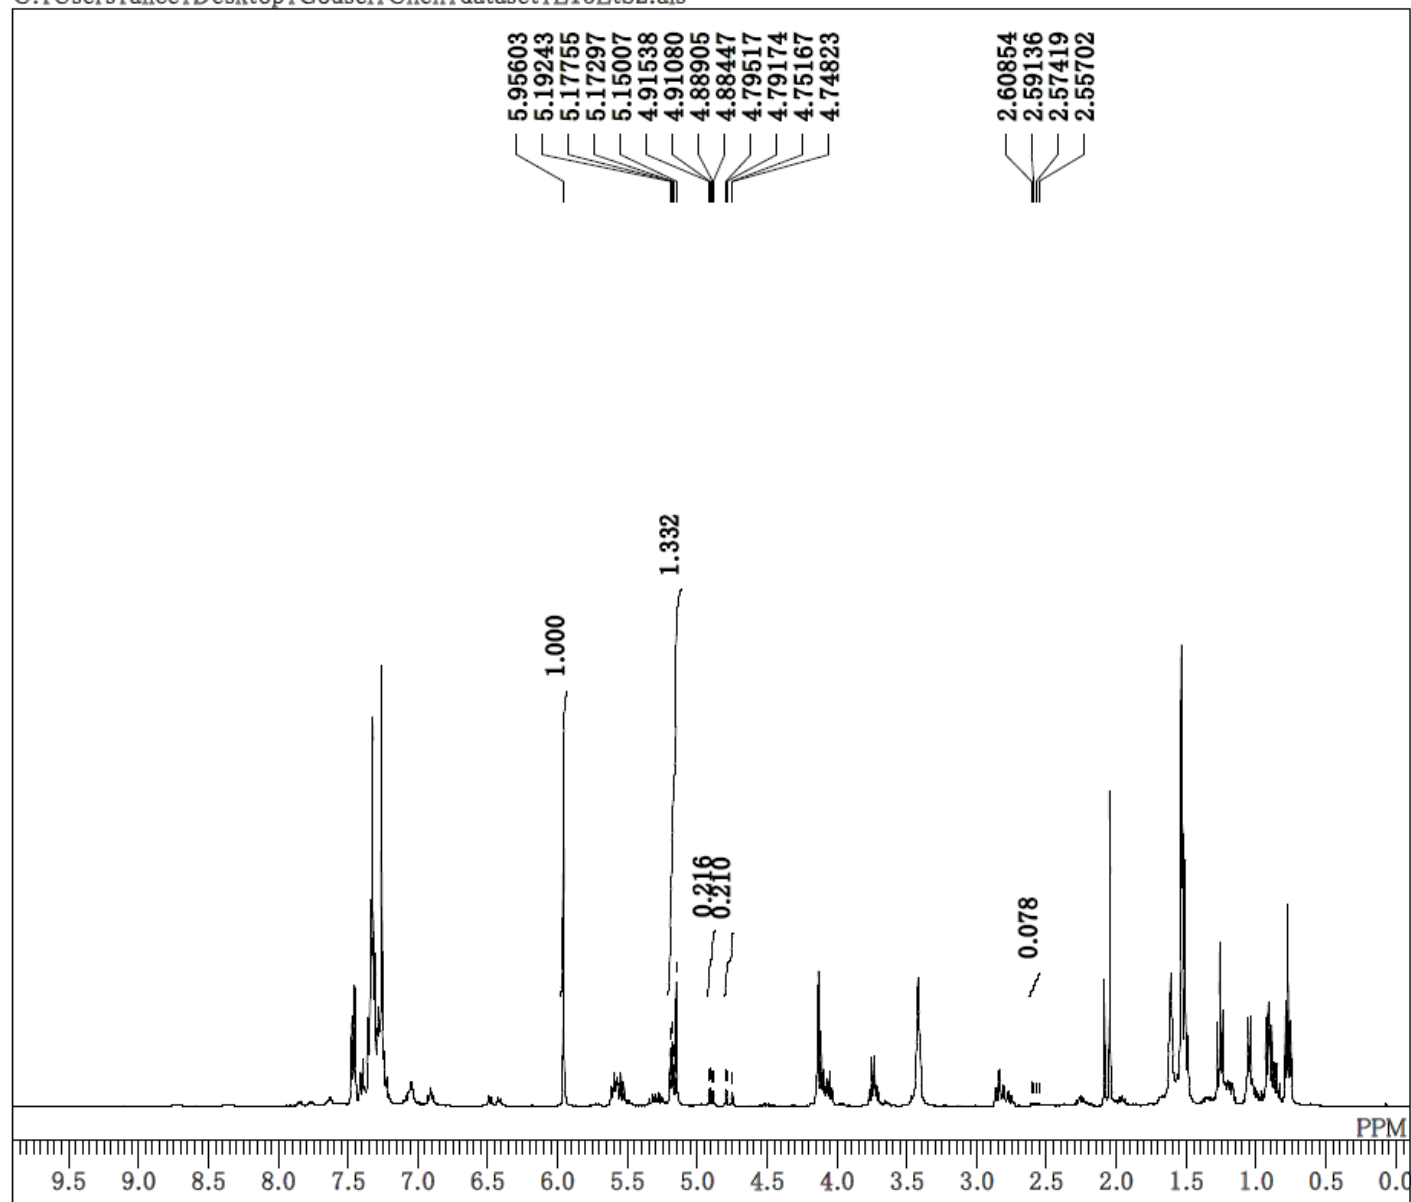

DFILE L15EtS2.als  
COMNT  
DATIM 07-09-2020 18:48:24  
OBNUC 1H  
EXMOD proton.jxp  
OBFRQ 391.78 MHz  
OBSET 8.51 KHz  
OBFIN 3.34 Hz  
POINT 13107  
FREQU 5878.90 Hz  
SCANS 8  
ACQTM 2.2295 sec  
PD 6.0000 sec  
PW1 5.17 usec  
IRNUC 1H  
CTEMP 20.8 c  
SLVNT CDCL3  
EXREF 7.26 ppm  
BF 1.20 Hz  
RGAIN 40

**L15/1Et, S**

(2<sup>nd</sup> trial)

60%, 3.1/1 dr, 11.4/1 b/l

C:\Users\Valice\Desktop\Gousei\Chen\dataset\L15PrS1.als

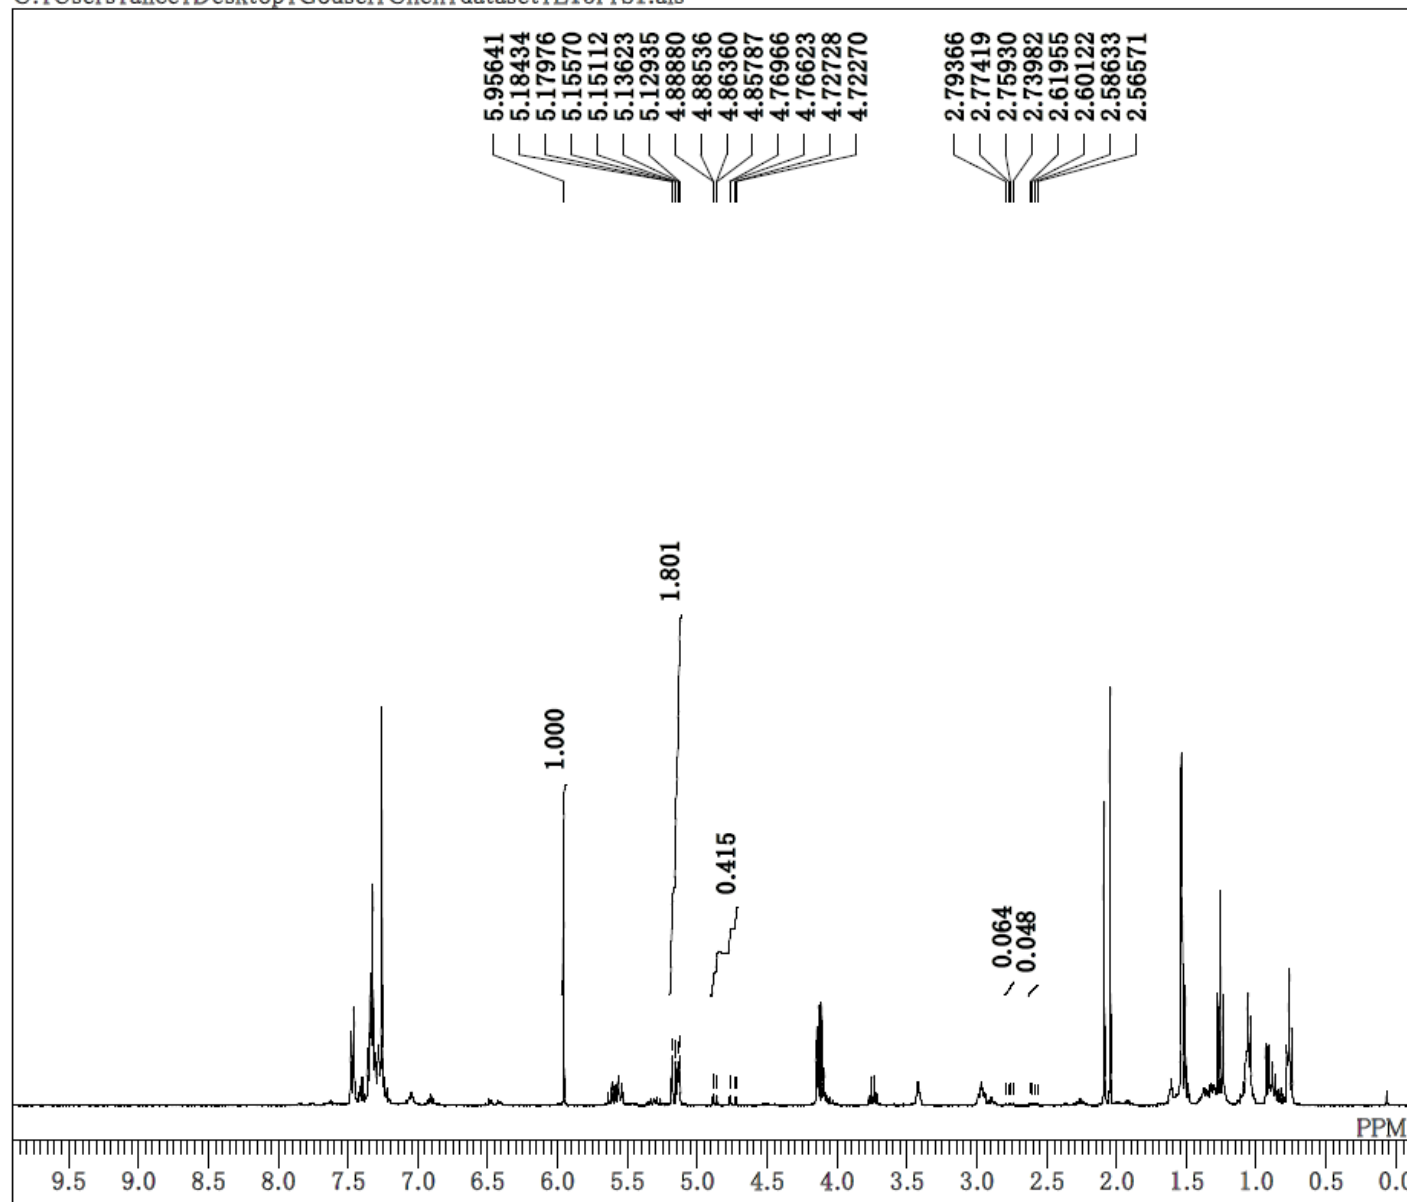

DFILE L15PrS1.als  
 COMNT  
 DATIM 16-01-2019 15:02:44  
 OBNUC 1H  
 EXMOD proton.jxp  
 OBFRQ 391.78 MHz  
 OBSET 8.51 KHz  
 OBFIN 3.34 Hz  
 POINT 13107  
 FREQU 5882.35 Hz  
 SCANS 8  
 ACQTM 2.2282 sec  
 PD 5.0000 sec  
 PW1 5.22 usec  
 IRNUC 1H  
 CTEMP 19.7 c  
 SLVNT CDCL3  
 EXREF 7.26 ppm  
 BF 0.12 Hz  
 RGAIN 40

**L15/1Pr, S**

(1<sup>st</sup> trial)

73%, 4.3/1 dr, 15.2/1 b/l

C:\Users\Valice\Desktop\Gousei\Chen\dataset\L15PrS2.als

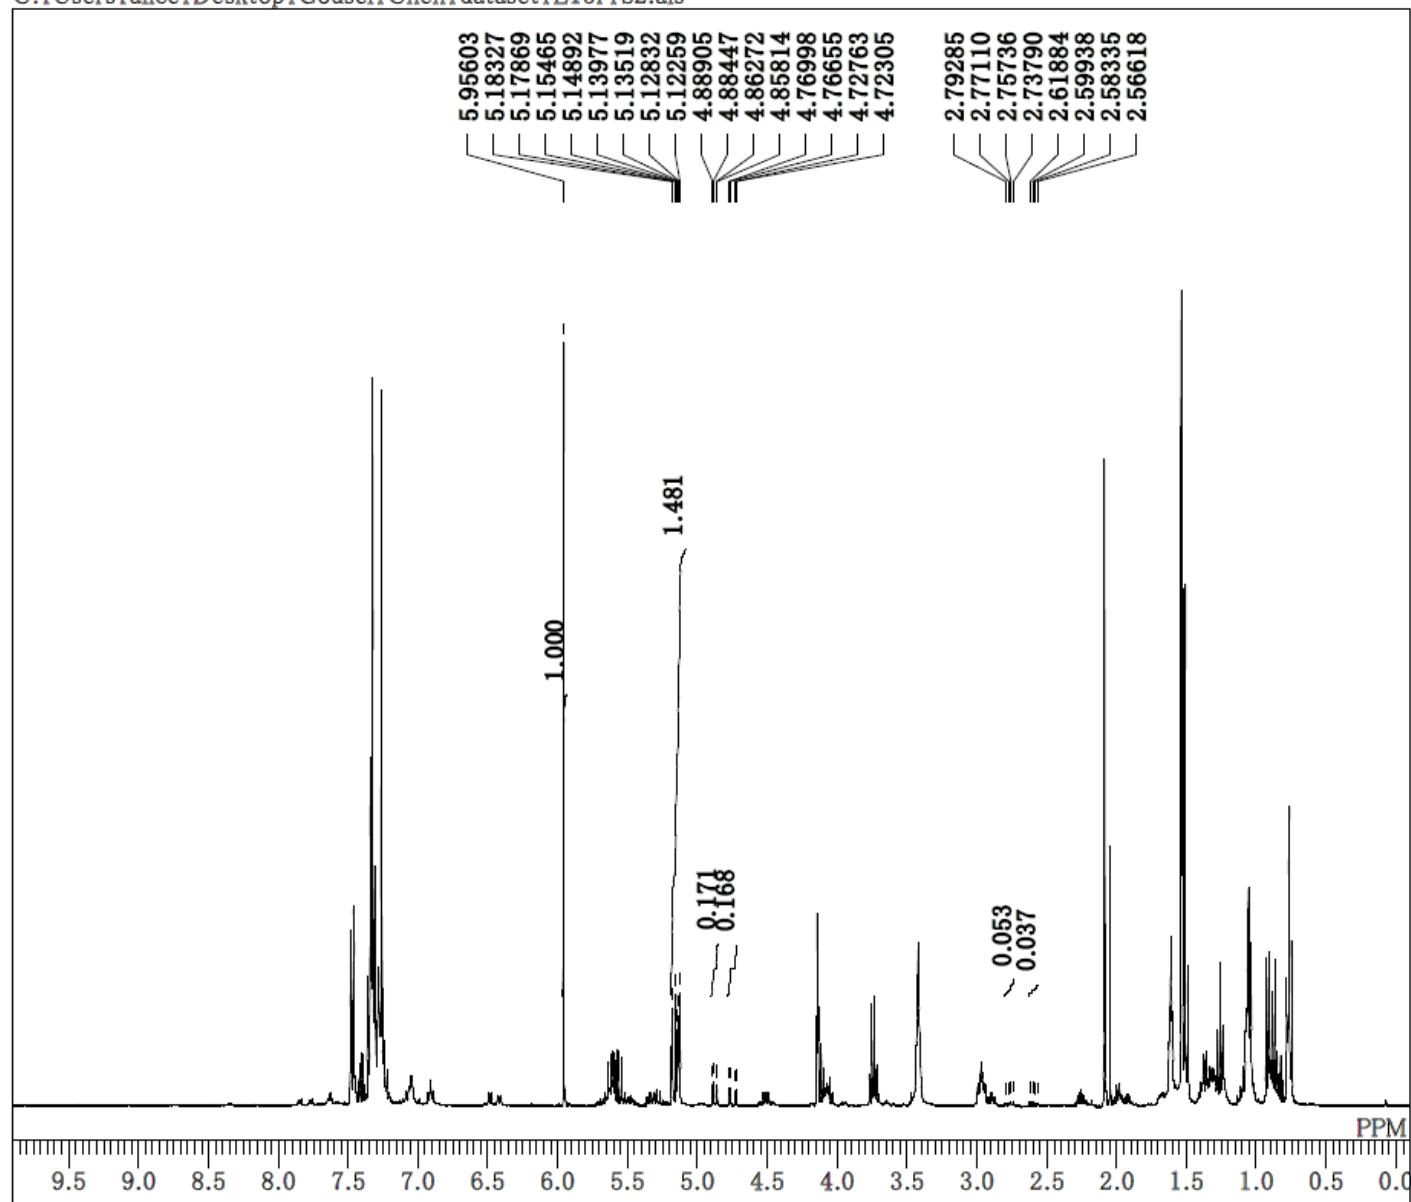

DFILE L15PrS2.als  
 COMNT  
 DATIM 07-09-2020 22:31:27  
 OBNUC 1H  
 EXMOD proton.jxp  
 OBFRQ 391.78 MHz  
 OBSET 8.51 KHz  
 OBFIN 3.34 Hz  
 POINT 13107  
 FREQU 5878.90 Hz  
 SCANS 8  
 ACQTM 2.2295 sec  
 PD 6.0000 sec  
 PW1 5.17 usec  
 IRNUC 1H  
 CTEMP 20.4 c  
 SLVNT CDCL3  
 EXREF 7.26 ppm  
 BF 0.12 Hz  
 RGAIN 40

**L15/1Pr, S**

(2<sup>nd</sup> trial)

60%, 4.4/1 dr, 20.2/1 b/l

C:\Users\Valice\Desktop\Gousei\Chen\dataset\L16EtS1.als

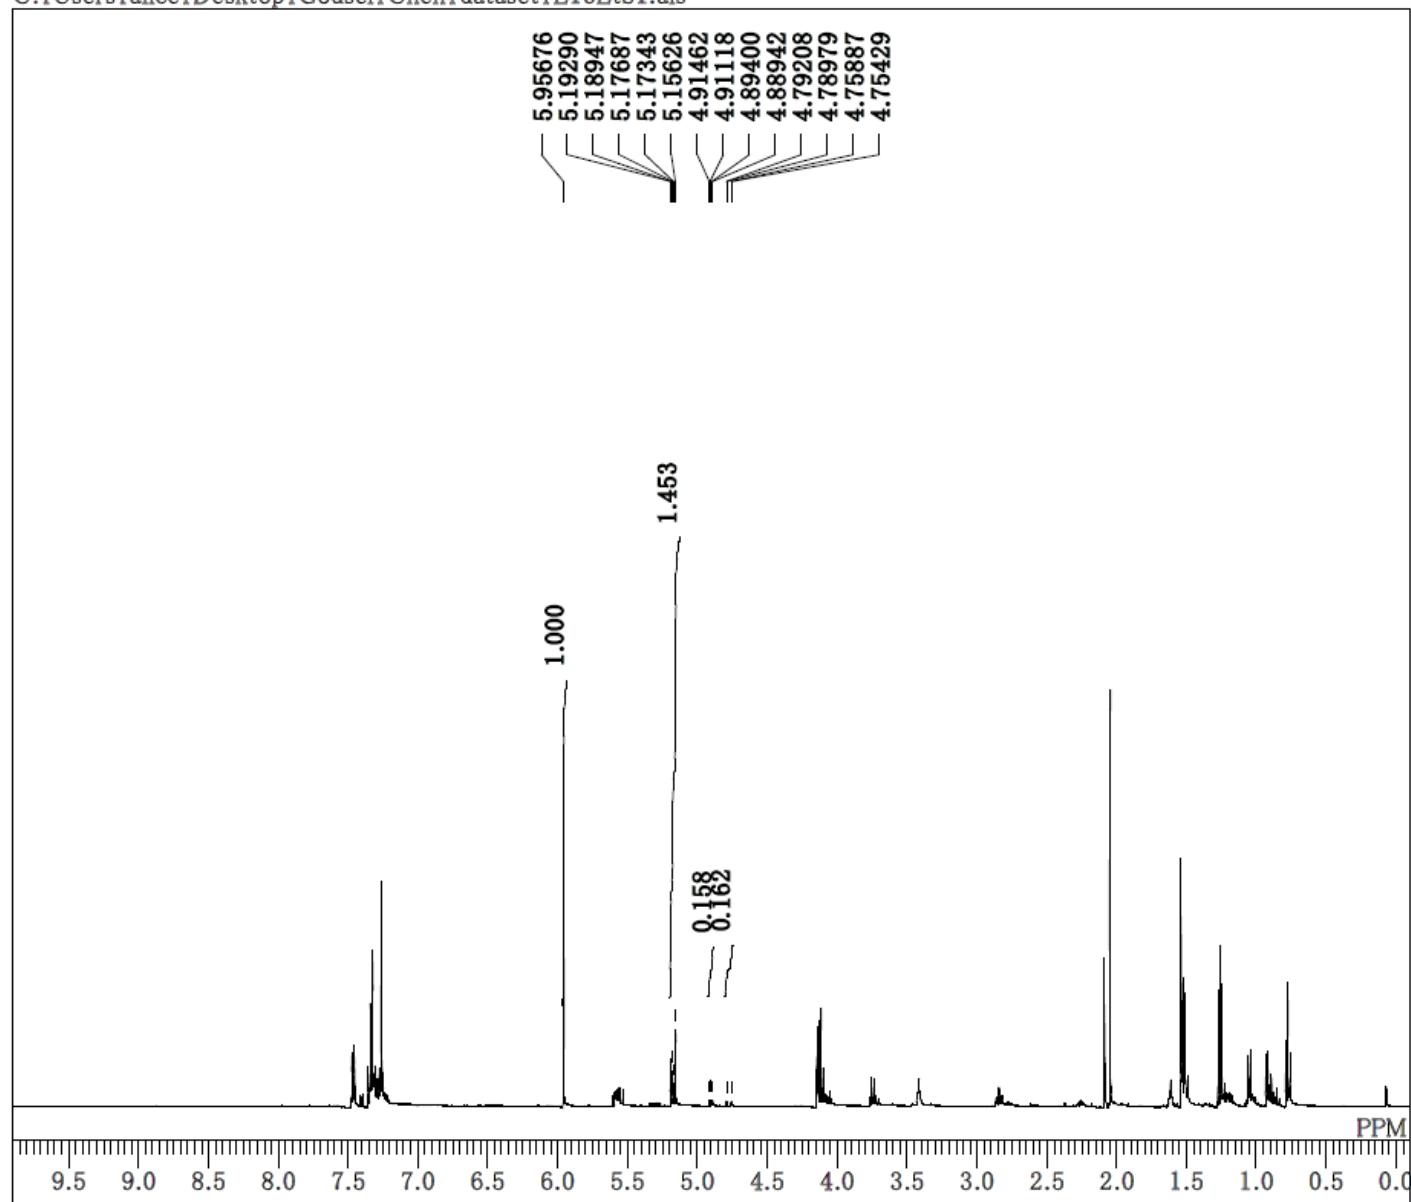

DFILE L16EtS1.als  
COMNT  
DATIM 2019-09-06 14:33:04  
OBNUC 1H  
EXMOD proton.jxp  
OBFRQ 500.16 MHz  
OBSET 2.41 KHz  
OBFIN 6.01 Hz  
POINT 13107  
FREQU 7507.51 Hz  
SCANS 8  
ACQTM 1.7459 sec  
PD 6.0000 sec  
PW1 5.55 usec  
IRNUC 1H  
CTEMP 21.5 c  
SLVNT CDCL3  
EXREF 7.26 ppm  
BF 0.12 Hz  
RGAIN 38

**L16/1Et, S**

(1<sup>st</sup> trial)

56%, 4.5/1 dr, >50/1 b/l



C:\Users\Valice\Desktop\Gousei\Chen\dataset\L16EtS2.als

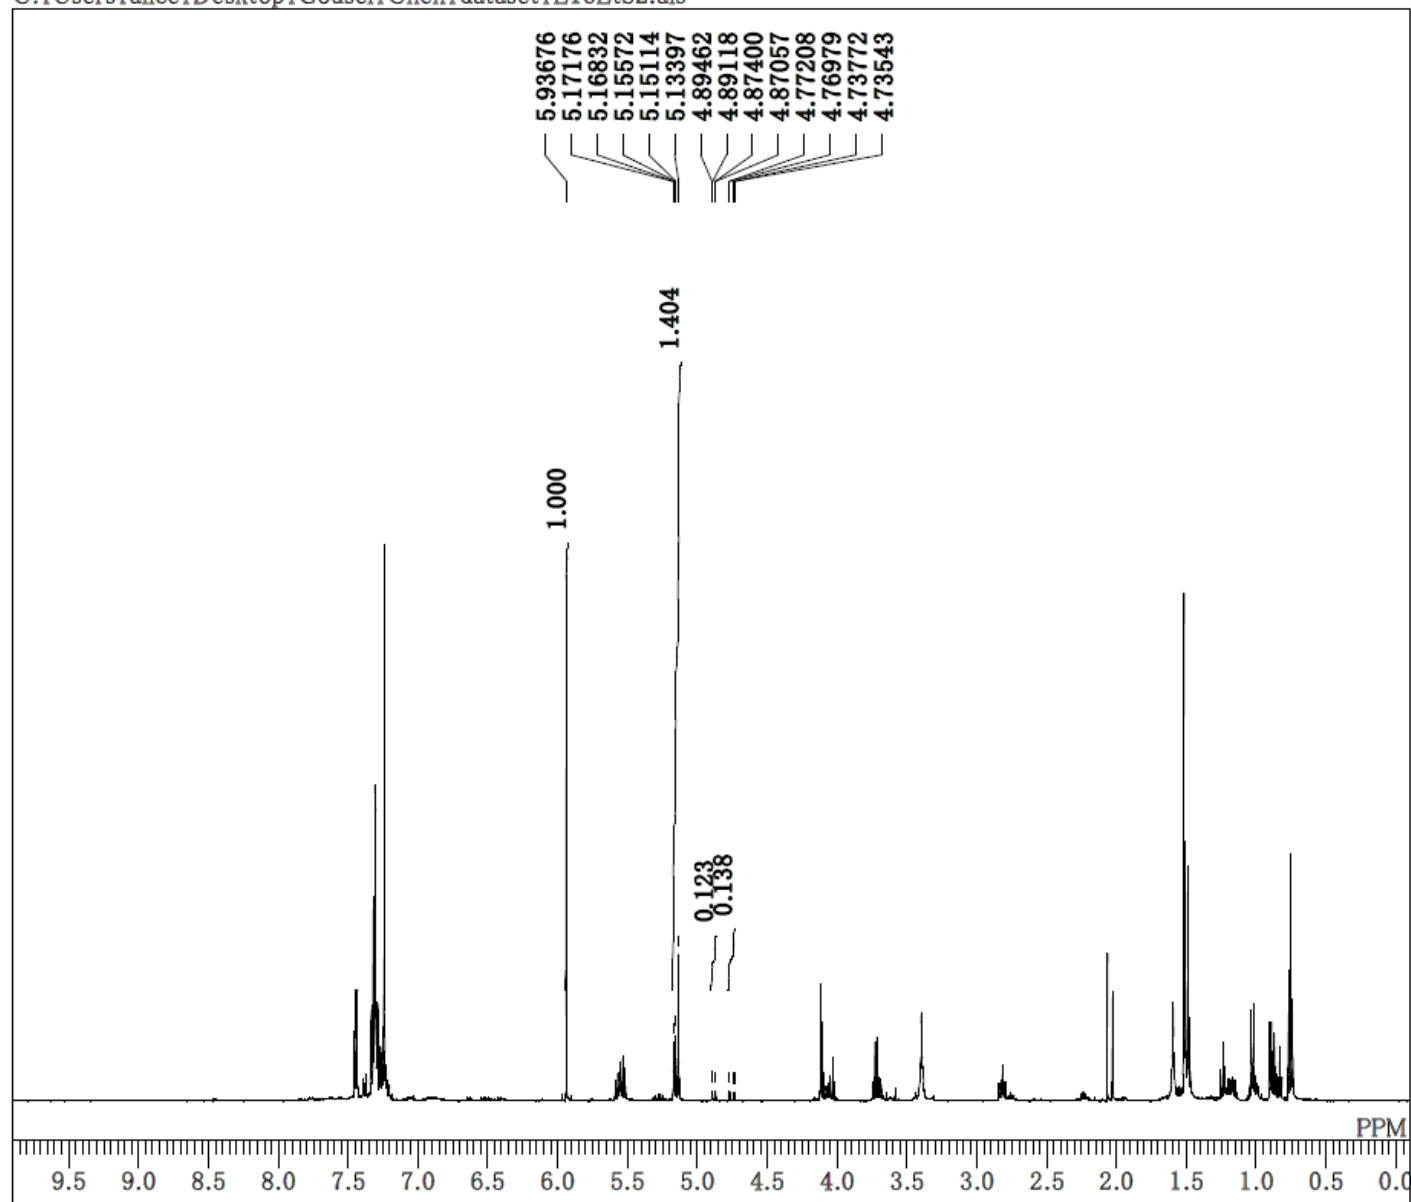

DFILE L16EtS2.als  
COMNT  
DATIM 2020-09-05 13:46:04  
OBNUC 1H  
EXMOD proton.jxp  
OBFRQ 500.16 MHz  
OBSET 2.41 KHz  
OBFIN 6.01 Hz  
POINT 13107  
FREQU 7507.51 Hz  
SCANS 8  
ACQTM 1.7459 sec  
PD 6.0000 sec  
PW1 5.55 usec  
IRNUC 1H  
CTEMP 21.9 c  
SLVNT CDCL3  
EXREF 7.24 ppm  
BF 0.12 Hz  
RGAIN 42

**L16/1Et, S**

(2<sup>nd</sup> trial)

52%, 5.4/1 dr, >50/1 b/l

C:\Users\Valice\Desktop\Gousei\Chen\dataset\L16PrS1.als

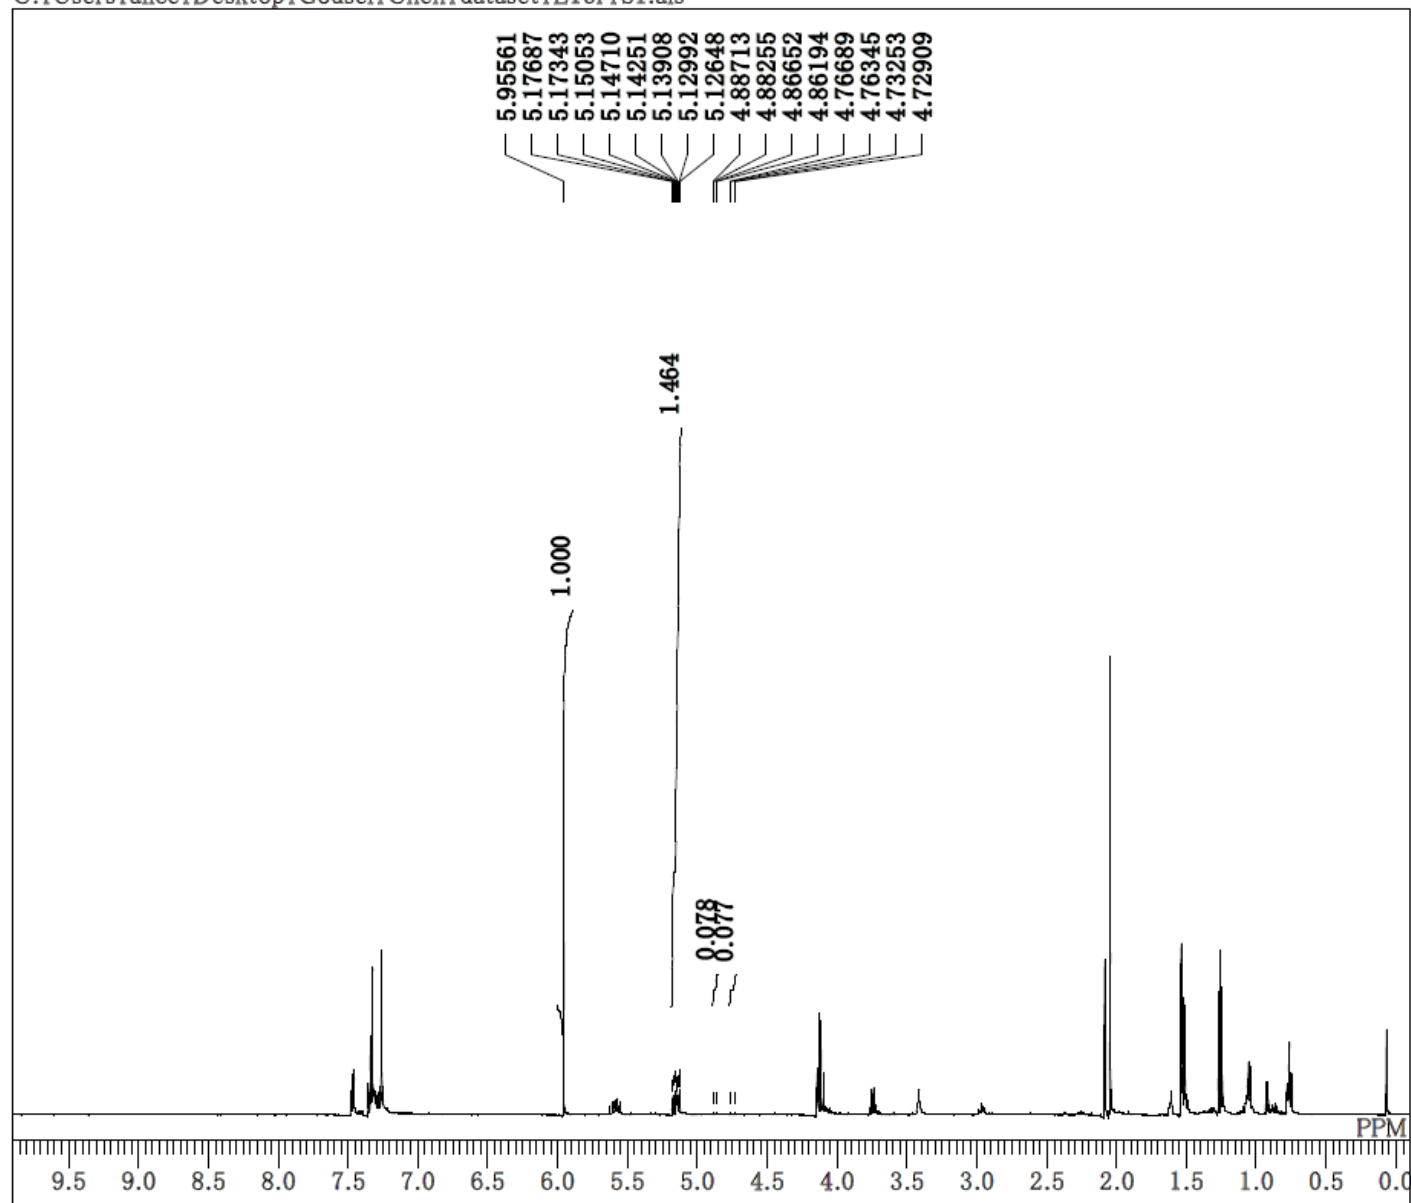

DFILE L16PrS1.als  
COMNT  
DATIM 2019-09-04 10:13:46  
OBNUC 1H  
EXMOD proton.jxp  
OBFRQ 500.16 MHz  
OBSET 2.41 KHz  
OBFIN 6.01 Hz  
POINT 13107  
FREQU 7507.51 Hz  
SCANS 8  
ACQTM 1.7459 sec  
PD 6.0000 sec  
PW1 5.55 usec  
IRNUC 1H  
CTEMP 21.7 c  
SLVNT CDCL3  
EXREF 7.26 ppm  
BF 0.12 Hz  
RGAIN 38

**L16/1Pr, S**

(1<sup>st</sup> trial)

51%, 9.4/1 dr, >50/1 b/l

C:\Users\Valice\Desktop\Gousei\Chen\dataset\L16PrS2.als

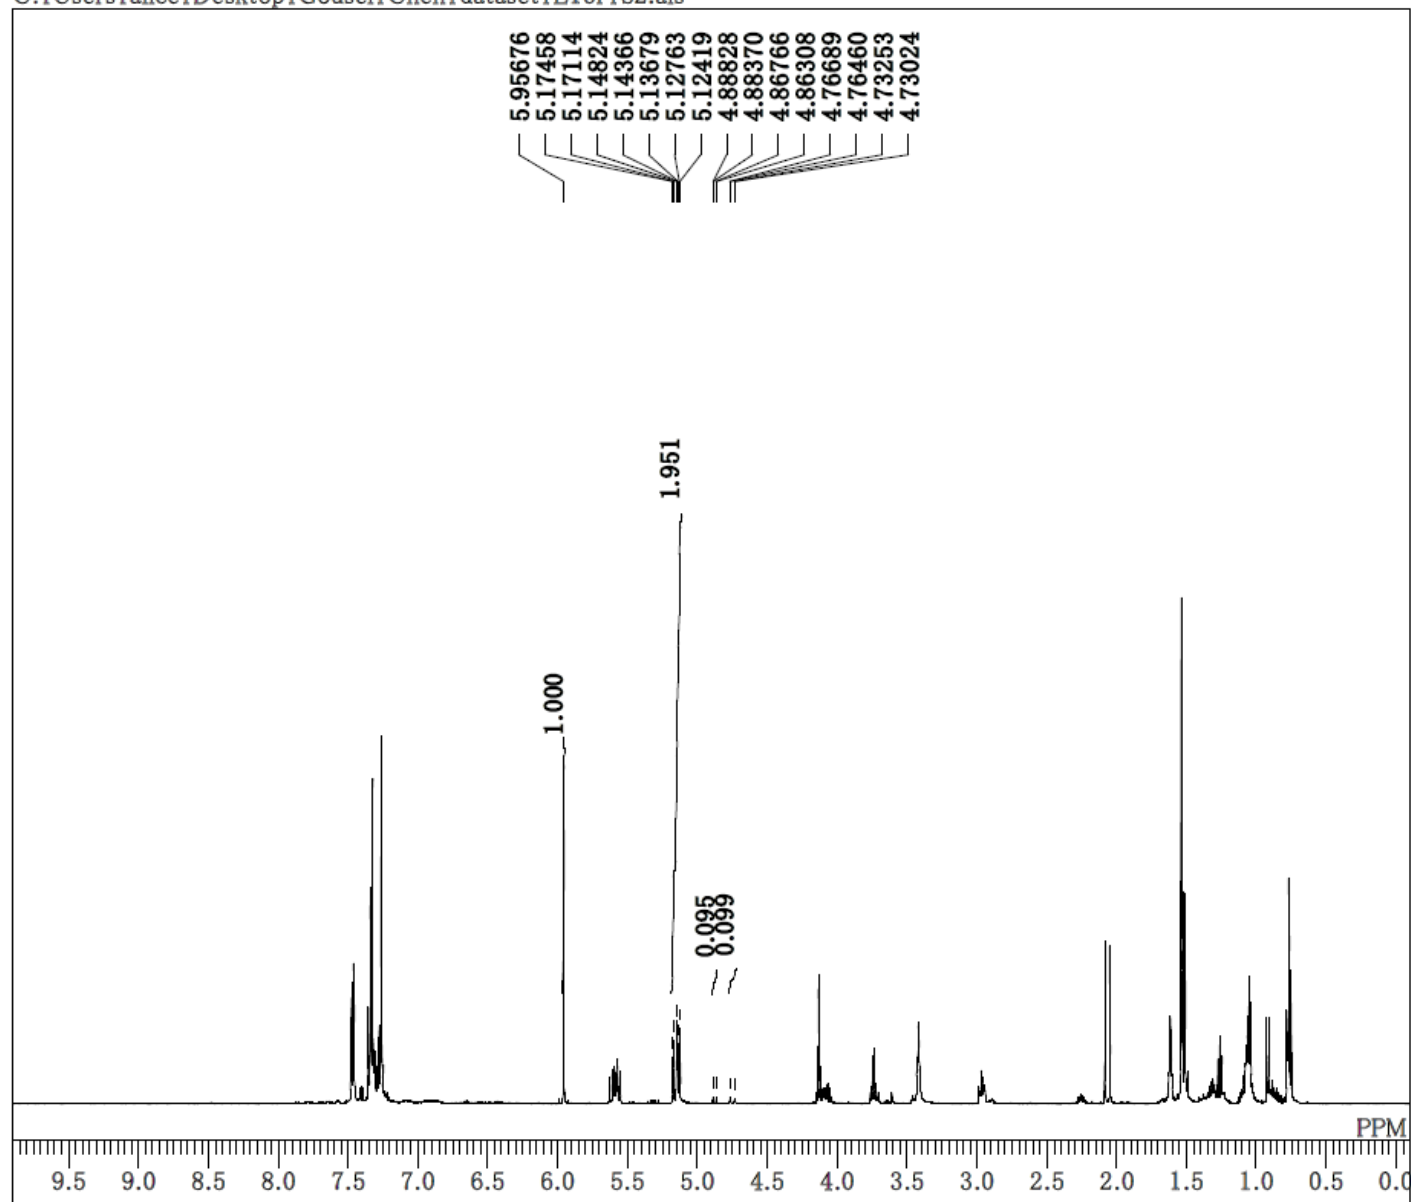

DFILE L16PrS2.als  
COMNT  
DATIM 2020-09-05 15:52:11  
OBNUC 1H  
EXMOD proton.jxp  
OBFRQ 500.16 MHz  
OBSET 2.41 KHz  
OBFIN 6.01 Hz  
POINT 13107  
FREQU 7507.51 Hz  
SCANS 16  
ACQTM 1.7459 sec  
PD 6.0000 sec  
PW1 5.55 usec  
IRNUC 1H  
CTEMP 22.0 c  
SLVNT CDCL3  
EXREF 7.26 ppm  
BF 0.12 Hz  
RGAIN 40

**L16/1Pr, S**

(2<sup>nd</sup> trial)

68%, 10.1/1 dr, >50/1 b/l
